# Supplementary material for: A transcriptome profile in gallbladder cancer based on annotation analysis of microarray studies
Source: PubMed Central journal article supplement — Mol Med Rep. 2020 Nov 3;23(1):25. doi: 10.3892/mmr.2020.11663 (PMC7673323; doi:10.3892/mmr.2020.11663), 2020-11-03
Supplement: Supplementary_Data.pdf [file Supplementary_Data.pdf]

Figure S1. Hierarchical clustering analysis. Figs. S1-S6 represent the genes that were often aberrantly expressed in comparison I, II, III, IV, V and VI, respectively.

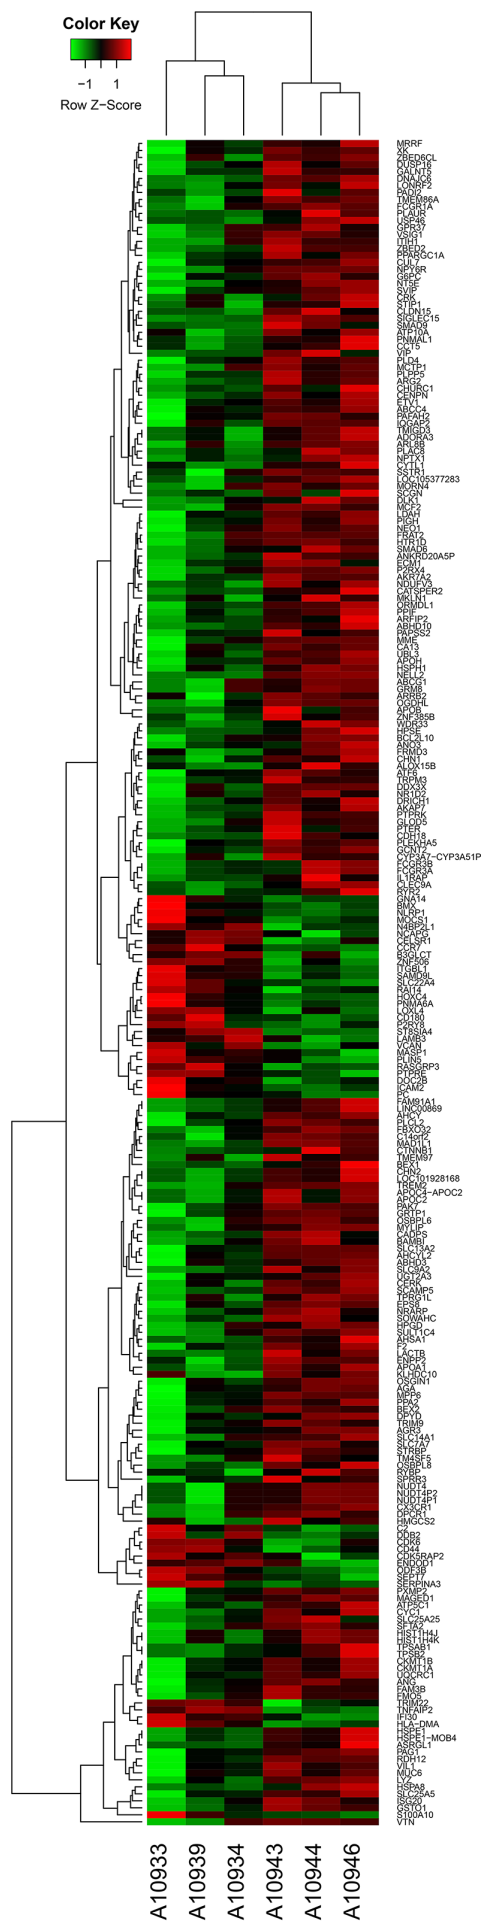

Figure S2. Hierarchical clustering analysis. Figs. S1-S6 represent the genes that were often aberrantly expressed in comparison I, II, III, IV, V and VI, respectively.

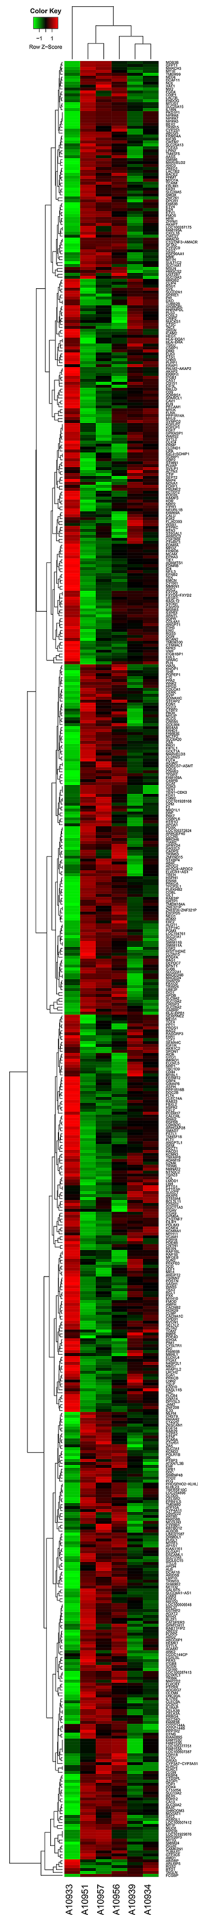



Figure S4. Hierarchical clustering analysis. Figs. S1-S6 represent the genes that were often aberrantly expressed in comparison I, II, III, IV, V and VI, respectively.

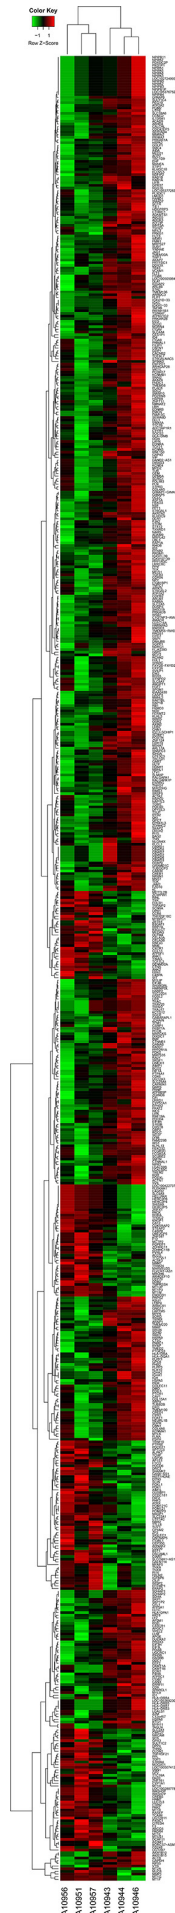

Figure S5. Hierarchical clustering analysis. Figs. S1-S6 represent the genes that were often aberrantly expressed in comparison I, II, III, IV, V and VI, respectively.

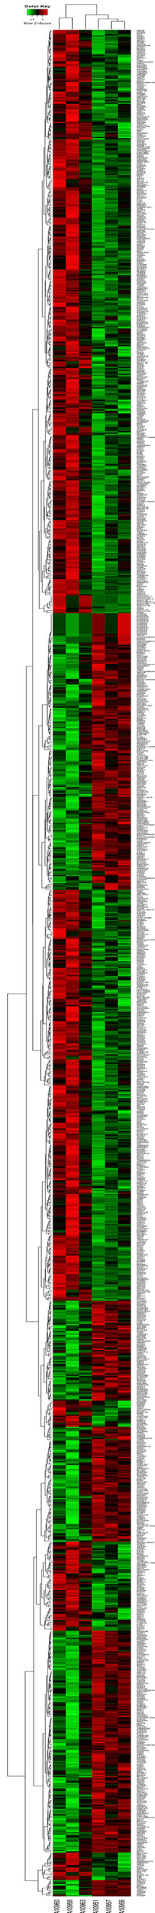

Figure S6. Hierarchical clustering analysis. Figs. S1-S6 represent the genes that were often aberrantly expressed in comparison I, II, III, IV, V and VI, respectively.

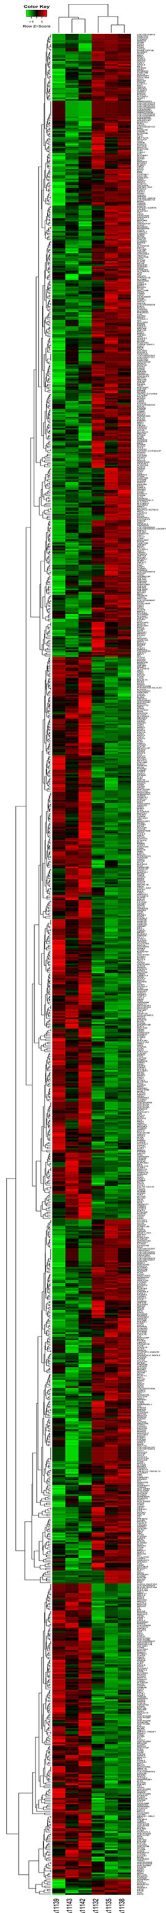

Table SI. DEGs in comparison I.

| Entrez<br>accession<br>no. | Gene<br>symbol | Gene name                                 | Gall<br>blad<br>der<br>wall<br>of<br>gall<br>ston<br>e<br>(A1<br>093<br>3) | Gall<br>blad<br>der<br>wall<br>of<br>gall<br>ston<br>e<br>(A1<br>093<br>4) | Gall<br>blad<br>der<br>wall<br>of<br>gall<br>ston<br>e<br>(A1<br>093<br>9) | Gall<br>blad<br>der<br>wall<br>of<br>chol<br>este<br>rol<br>pol<br>yps<br>(A1<br>094<br>3) | Gall<br>blad<br>der<br>wall<br>of<br>chol<br>este<br>rol<br>pol<br>yps<br>(A1<br>094<br>4) | Gall<br>blad<br>der<br>wall<br>of<br>chol<br>este<br>rol<br>pol<br>yps<br>(A1<br>094<br>6) | Fold-ch<br>ange  | Log<br>Fold-ch<br>ange | Absolut<br>e<br>Fold-ch<br>ange | Regul<br>ation | P-value         | False<br>discove<br>ry rate |
|----------------------------|----------------|-------------------------------------------|----------------------------------------------------------------------------|----------------------------------------------------------------------------|----------------------------------------------------------------------------|--------------------------------------------------------------------------------------------|--------------------------------------------------------------------------------------------|--------------------------------------------------------------------------------------------|------------------|------------------------|---------------------------------|----------------|-----------------|-----------------------------|
| 6415<br>1                  | NCA<br>PG      | Non-SMC<br>condensin I<br>complex subunit | 3.98<br>958                                                                | 4.26<br>032                                                                | 4.35<br>235                                                                | 3.91<br>397                                                                                | 3.23<br>455                                                                                | 3.69<br>121                                                                                | -1.5026<br>47556 | -0.5875<br>06667       | 1.5026<br>47556                 | Down           | 0.0218<br>45186 | 0.9845<br>43317             |

|           |            | G                                                                    |             |             |             |             |             |             |                  |                  |                 |      |                 |                 |
|-----------|------------|----------------------------------------------------------------------|-------------|-------------|-------------|-------------|-------------|-------------|------------------|------------------|-----------------|------|-----------------|-----------------|
| 9630      | GNA<br>14  | Guanine<br>nucleotide<br>binding protein<br>(G protein), $\alpha$ 14 | 5.48<br>101 | 4.17<br>76  | 4.56<br>219 | 3.70<br>162 | 4.02<br>551 | 4.01<br>37  | -1.7735<br>70485 | -0.8266<br>56667 | 1.7735<br>70485 | Down | 0.0415<br>33501 | 0.9845<br>43317 |
| 2706<br>8 | PPA2       | Pyrophosphatase<br>(inorganic) 2                                     | 6.87<br>149 | 7.79<br>937 | 7.69<br>584 | 8.15<br>868 | 7.96<br>014 | 8.44<br>246 | 1.6603<br>952    | 0.7315<br>26667  | 1.6603<br>952   | Up   | 0.0389<br>65051 | 0.9845<br>43317 |
| 3697      | ITIH<br>1  | Inter- $\alpha$ -trypsin<br>inhibitor heavy<br>chain 1               | 4.53<br>139 | 5.76<br>317 | 4.63<br>167 | 6.39<br>866 | 5.80<br>243 | 5.77<br>947 | 2.0252<br>64027  | 1.0181<br>1      | 2.0252<br>64027 | Up   | 0.0293<br>25951 | 0.9845<br>43317 |
| 7448      | VTN        | Vitronectin                                                          | 11.4<br>524 | 12.8<br>472 | 11.7<br>036 | 13.0<br>509 | 12.9<br>780 | 12.8<br>385 | 1.9382<br>30298  | 0.9547<br>4      | 1.9382<br>30298 | Up   | 0.0331<br>0537  | 0.9845<br>43317 |
| 8015<br>0 | ASR<br>GL1 | Asparaginase like<br>1                                               | 9.17<br>727 | 9.19<br>058 | 9.22<br>682 | 9.62<br>751 | 9.53<br>403 | 10.2<br>263 | 1.5133<br>47533  | 0.5977<br>43333  | 1.5133<br>47533 | Up   | 0.0260<br>78823 | 0.9845<br>43317 |
| 3776      | CA13       | Carbonic                                                             | 4.37        | 5.47        | 6.05        | 6.59        | 6.21        | 6.49        | 2.2015           | 1.1385           | 2.2015          | Up   | 0.0305          | 0.9845          |



|      |      |                                           |      |      |      |      |      |      |         |         |        |      |        |        |
|------|------|-------------------------------------------|------|------|------|------|------|------|---------|---------|--------|------|--------|--------|
| 77   |      | anhydrase XIII                            | 102  | 31   | 167  | 903  | 408  | 821  | 35335   | 1       | 35335  |      | 87898  | 43317  |
| 5534 | ABH  | Abhydrolase                               | 5.29 | 5.60 | 5.43 | 6.13 | 5.97 | 6.56 | 1.7208  | 0.7831  | 1.7208 | Up   | 0.0061 | 0.9845 |
| 7    | D10  | domain<br>containing 10                   | 03   | 036  | 964  | 952  | 675  | 334  | 28512   | 03333   | 28512  |      | 08075  | 43317  |
| 9358 | ITGB | Integrin $\beta$ like 1                   | 6.45 | 5.51 | 5.40 | 4.62 | 5.05 | 4.75 | -1.9697 | -0.9780 | 1.9697 | Down | 0.0154 | 0.9845 |
|      | L1   |                                           | 273  | 838  | 511  | 81   | 948  | 452  | 87499   | 4       | 87499  |      | 46112  | 43317  |
| 2322 | PLCL | Phospholipase C                           | 6.03 | 6.81 | 6.57 | 7.25 | 7.14 | 7.01 | 1.5877  | 0.6669  | 1.5877 | Up   | 0.0235 | 0.9845 |
| 8    | 2    | like 2                                    | 216  | 048  | 182  | 358  | 245  | 926  | 05498   | 43333   | 05498  |      | 74432  | 43317  |
| 1034 | TRI  | Tripartite motif                          | 9.67 | 9.50 | 9.73 | 8.58 | 9.15 | 9.28 | -1.5461 | -0.6286 | 1.5461 | Down | 0.0234 | 0.9845 |
| 6    | M22  | containing 22                             | 375  | 515  | 607  | 859  | 816  | 216  | 56835   | 86667   | 56835  |      | 00589  | 43317  |
| 4091 | SMA  | SMAD family                               | 5.88 | 6.52 | 6.11 | 6.46 | 7.10 | 6.83 | 1.5435  | 0.6262  | 1.5435 | Up   | 0.0379 | 0.9845 |
|      | D6   | member 6                                  | 517  | 234  | 404  | 369  | 056  | 611  | 69027   | 7       | 69027  |      | 55667  | 43317  |
| 1648 | LON  | LON peptidase                             | 4.93 | 5.30 | 4.84 | 5.66 | 5.27 | 5.90 | 1.5060  | 0.5908  | 1.5060 | Up   | 0.0308 | 0.9845 |
| 32   | RF2  | N-terminal<br>domain and ring<br>finger 2 | 314  | 109  | 206  | 957  | 128  | 789  | 99064   | 16667   | 99064  |      | 42476  | 43317  |
| 1001 | BCL2 | BCL2-like 10                              | 4.10 | 4.94 | 4.55 | 4.95 | 5.33 | 5.32 | 1.5916  | 0.6705  | 1.5916 | Up   | 0.0273 | 0.9845 |

|      |      |                                        |      |      |      |      |      |      |         |         |        |      |        |        |
|------|------|----------------------------------------|------|------|------|------|------|------|---------|---------|--------|------|--------|--------|
| 7    | L10  | (apoptosis<br>facilitator)             | 962  | 207  | 308  | 373  | 757  | 503  | 46552   | 2       | 46552  |      | 95614  | 43317  |
| 1140 | TRI  | Tripartite motif                       | 5.87 | 7.73 | 7.30 | 8.63 | 8.28 | 7.88 | 2.4510  | 1.2934  | 2.4510 | Up   | 0.0352 | 0.9845 |
| 88   | M9   | containing 9                           | 481  | 926  | 811  | 477  | 45   | 319  | 9545    | 26667   | 9545   |      | 36245  | 43317  |
| 2734 | TME  | Transmembrane                          | 6.51 | 6.38 | 7.12 | 7.69 | 7.07 | 7.22 | 1.5723  | 0.6528  | 1.5723 | Up   | 0.0454 | 0.9845 |
| 6    | M97  | protein 97                             | 45   | 591  | 804  | 569  | 018  | 122  | 03798   | 8       | 03798  |      | 81147  | 43317  |
| 660  | BMX  | BMX<br>non-receptor<br>tyrosine kinase | 5.58 | 4.34 | 4.30 | 3.95 | 3.72 | 4.00 | -1.8021 | -0.8497 | 1.8021 | Down | 0.0475 | 0.9845 |
|      |      |                                        | 865  | 559  | 003  | 468  | 769  | 267  | 80275   | 43333   | 80275  |      | 10021  | 43317  |
| 5409 | FAM  | Family with                            | 7.61 | 8.98 | 8.63 | 9.83 | 9.16 | 9.11 | 1.9466  | 0.9609  | 1.9466 | Up   | 0.0450 | 0.9845 |
| 7    | 3B   | sequence<br>similarity 3<br>member B   | 672  | 351  | 249  | 82   | 225  | 514  | 00279   | 56667   | 00279  |      | 8553   | 43317  |
| 9063 | N4BP | NEDD4 binding                          | 4.53 | 4.49 | 4.20 | 3.54 | 3.96 | 3.93 | -1.5147 | -0.5991 | 1.5147 | Down | 0.0082 | 0.9845 |
| 4    | 2L1  | protein 2-like 1                       | 763  | 816  | 277  | 376  | 122  | 62   | 99307   | 26667   | 99307  |      | 47316  | 43317  |
| 6052 | LDA  | Lipid droplet                          | 5.73 | 6.41 | 6.50 | 6.90 | 6.74 | 7.04 | 1.5996  | 0.6777  | 1.5996 | Up   | 0.0270 | 0.9845 |
| 6    | H    | associated                             | 39   | 746  | 732  | 232  | 859  | 107  | 61516   | 66667   | 61516  |      | 49558  | 43317  |

|            |            |                                                                     |             |             |             |             |             |             |                  |                 |                 |      |                 |                 |
|------------|------------|---------------------------------------------------------------------|-------------|-------------|-------------|-------------|-------------|-------------|------------------|-----------------|-----------------|------|-----------------|-----------------|
|            |            | hydrolase                                                           |             |             |             |             |             |             |                  |                 |                 |      |                 |                 |
| 3914       | LAM<br>B3  | Laminin subunit $\beta$<br>3                                        | 5.30<br>498 | 6.21<br>147 | 5.45<br>485 | 5.22<br>555 | 3.99<br>354 | 4.39<br>302 | -2.1730<br>62999 | -1.1197<br>3    | 2.1730<br>62999 | Down | 0.0220<br>84184 | 0.9845<br>43317 |
| 1148<br>82 | OSB<br>PL8 | Oxysterol binding<br>protein like 8                                 | 7.38<br>312 | 7.53<br>895 | 7.84<br>777 | 8.67<br>02  | 8.17<br>635 | 9.08<br>359 | 2.0754<br>63173  | 1.0534<br>33333 | 2.0754<br>63173 | Up   | 0.0059<br>52566 | 0.9845<br>43317 |
| 344        | APO<br>C2  | Apolipoprotein<br>C-II                                              | 6.06<br>565 | 6.58<br>253 | 5.60<br>903 | 7.88<br>934 | 6.60<br>426 | 7.64<br>836 | 2.4536<br>28223  | 1.2949<br>16667 | 2.4536<br>28223 | Up   | 0.0156<br>3271  | 0.9845<br>43317 |
| 4731       | NDU<br>FV3 | NADH:ubiquinon<br>e oxidoreductase<br>subunit V3                    | 5.98<br>142 | 5.82<br>403 | 6.15<br>848 | 6.85<br>944 | 6.37<br>279 | 6.87<br>874 | 1.6422<br>57097  | 0.7156<br>8     | 1.6422<br>57097 | Up   | 0.0092<br>6413  | 0.9845<br>43317 |
| 3158       | HMG<br>CS2 | 3-hydroxy-3-meth<br>ylglutaryl-coa<br>synthase 2<br>(mitochondrial) | 8.40<br>162 | 7.09<br>511 | 6.42<br>248 | 9.75<br>264 | 8.05<br>394 | 8.63<br>892 | 2.8456<br>60068  | 1.5087<br>63333 | 2.8456<br>60068 | Up   | 0.0452<br>83069 | 0.9845<br>43317 |
| 7979<br>9  | UGT<br>2A3 | UDP<br>glucuronosyltrans<br>ferase 2 family,                        | 5.09<br>675 | 7.17<br>791 | 7.45<br>864 | 7.58<br>629 | 8.23<br>638 | 8.86<br>288 | 3.1399<br>68313  | 1.6507<br>5     | 3.1399<br>68313 | Up   | 0.0436<br>51412 | 0.9845<br>43317 |

|      |            |                                                                                             |             |             |             |             |             |             |                 |                 |                 |    |                 |                 |
|------|------------|---------------------------------------------------------------------------------------------|-------------|-------------|-------------|-------------|-------------|-------------|-----------------|-----------------|-----------------|----|-----------------|-----------------|
|      |            | polypeptide A3                                                                              |             |             |             |             |             |             |                 |                 |                 |    |                 |                 |
| 2115 | ETV1       | Ets variant 1                                                                               | 4.05<br>737 | 5.16<br>4   | 5.00<br>064 | 5.58<br>062 | 5.29<br>164 | 5.94<br>343 | 1.8207<br>84271 | 0.8645<br>6     | 1.8207<br>84271 | Up | 0.0354<br>13324 | 0.9845<br>43317 |
| 2538 | G6PC       | Glucose-6-phosph<br>atase, catalytic<br>subunit                                             | 4.75<br>452 | 5.43<br>539 | 5.53<br>366 | 5.93<br>609 | 6.14<br>29  | 5.72<br>377 | 1.6167<br>12709 | 0.6930<br>63333 | 1.6167<br>12709 | Up | 0.0272<br>93841 | 0.9845<br>43317 |
| 9820 | CUL<br>7   | Cullin 7                                                                                    | 5.00<br>998 | 5.77<br>329 | 5.65<br>355 | 5.96<br>664 | 6.01<br>264 | 6.27<br>402 | 1.5214<br>98945 | 0.6054<br>93333 | 1.5214<br>98945 | Up | 0.0384<br>64528 | 0.9845<br>43317 |
| 4168 | MCF<br>2   | MCF.2 cell line<br>derived<br>transforming<br>sequence                                      | 3.19<br>158 | 5.94<br>366 | 2.65<br>389 | 7.52<br>151 | 7.23<br>073 | 6.38<br>593 | 8.6718<br>91262 | 3.1163<br>46667 | 8.6718<br>91262 | Up | 0.0088<br>92106 | 0.9845<br>43317 |
| 509  | ATP5<br>C1 | ATP synthase, H+<br>transporting,<br>mitochondrial F1<br>complex, $\gamma$<br>polypeptide 1 | 8.62<br>478 | 8.90<br>994 | 9.09<br>255 | 9.38<br>704 | 9.32<br>925 | 9.74<br>082 | 1.5262<br>02787 | 0.6099<br>46667 | 1.5262<br>02787 | Up | 0.0166<br>63333 | 0.9845<br>43317 |

|      |      |                                                      |      |      |      |      |      |      |        |        |        |    |        |        |
|------|------|------------------------------------------------------|------|------|------|------|------|------|--------|--------|--------|----|--------|--------|
| 2059 | EPS8 | Epidermal growth factor receptor pathway substrate 8 | 6.45 | 6.97 | 7.31 | 7.58 | 7.70 | 7.60 | 1.6449 | 0.7180 | 1.6449 | Up | 0.0203 | 0.9845 |
|      |      |                                                      | 21   | 625  | 39   | 526  | 819  | 306  | 98954  | 86667  | 98954  |    | 69704  | 43317  |
| 1142 | LAC  | Lactamase $\beta$                                    | 7.35 | 7.41 | 7.29 | 8.25 | 7.71 | 7.99 | 1.5534 | 0.6355 | 1.5534 | Up | 0.0101 | 0.9845 |
| 94   | TB   |                                                      | 344  | 234  | 355  | 159  | 489  | 936  | 7964   | 03333  | 7964   |    | 35842  | 43317  |
| 2338 | AHC  | Adenosylhomocysteinase-like 2                        | 6.06 | 6.82 | 7.06 | 7.42 | 7.43 | 7.48 | 1.7327 | 0.7930 | 1.7327 | Up | 0.0230 | 0.9845 |
| 2    | YL2  |                                                      | 694  | 365  | 85   | 461  | 048  | 329  | 89813  | 96667  | 89813  |    | 41238  | 43317  |
| 2723 | SUL  | Sulfotransferase family 1C member 4                  | 6.63 | 7.24 | 6.78 | 7.50 | 7.35 | 7.57 | 1.5028 | 0.5876 | 1.5028 | Up | 0.0231 | 0.9845 |
| 3    | T1C4 |                                                      | 325  | 64   | 895  | 725  | 134  | 298  | 03797  | 56667  | 03797  |    | 87931  | 43317  |
| 1511 | ZNF3 | Zinc finger protein 385B                             | 5.11 | 5.10 | 4.06 | 7.29 | 5.58 | 6.14 | 2.9907 | 1.5804 | 2.9907 | Up | 0.0163 | 0.9845 |
| 26   | 85B  |                                                      | 087  | 602  | 066  | 064  | 057  | 78   | 07187  | 86667  | 07187  |    | 89101  | 43317  |
| 8451 | PLPP | Phospholipid phosphatase 5                           | 4.23 | 4.91 | 4.90 | 5.86 | 5.27 | 5.48 | 1.8123 | 0.8578 | 1.8123 | Up | 0.0117 | 0.9845 |
| 3    | 5    |                                                      | 119  | 952  | 17   | 003  | 631  | 967  | 56371  | 66667  | 56371  |    | 46133  | 43317  |
| 8003 | TRP  | Transient receptor potential cation                  | 3.74 | 4.56 | 4.38 | 5.54 | 4.84 | 4.87 | 1.8083 | 0.8546 | 1.8083 | Up | 0.0207 | 0.9845 |
| 6    | M3   |                                                      | 671  | 447  | 304  | 264  | 277  | 288  | 70139  | 9      | 70139  |    | 8101   | 43317  |

|           |                   |                                                                                        |             |             |             |             |             |             |                 |                 |                 |    |                 |                 |
|-----------|-------------------|----------------------------------------------------------------------------------------|-------------|-------------|-------------|-------------|-------------|-------------|-----------------|-----------------|-----------------|----|-----------------|-----------------|
|           |                   | channel,<br>subfamily M,<br>member 3                                                   |             |             |             |             |             |             |                 |                 |                 |    |                 |                 |
| 1089<br>1 | PPA<br>RGC<br>1A  | Peroxisome<br>proliferator-activa<br>ted receptor $\gamma$ ,<br>coactivator 1 $\alpha$ | 4.13<br>042 | 5.40<br>051 | 5.18<br>03  | 6.71<br>609 | 5.50<br>713 | 6.36<br>366 | 2.4484<br>74776 | 1.2918<br>83333 | 2.4484<br>74776 | Up | 0.0219<br>03709 | 0.9845<br>43317 |
| 9239<br>9 | MRR<br>F          | Mitochondrial<br>ribosome<br>recycling factor                                          | 4.51<br>916 | 5.10<br>929 | 5.40<br>633 | 5.55<br>957 | 5.46<br>269 | 6.06<br>278 | 1.6059<br>42234 | 0.6834<br>2     | 1.6059<br>42234 | Up | 0.0447<br>29776 | 0.9845<br>43317 |
| 5025      | P2RX<br>4         | Purinergic<br>receptor P2X,<br>ligand gated ion<br>channel, 4                          | 5.48<br>51  | 6.31<br>326 | 5.85<br>511 | 6.63<br>001 | 6.53<br>645 | 6.68<br>756 | 1.6626<br>87068 | 0.7335<br>16667 | 1.6626<br>87068 | Up | 0.0162<br>99087 | 0.9845<br>43317 |
| 5723<br>4 | LINC<br>0086<br>9 | Long intergenic<br>non-protein<br>coding RNA 869                                       | 6.40<br>799 | 6.69<br>703 | 6.56<br>82  | 6.93<br>653 | 7.09<br>127 | 7.44<br>719 | 1.5163<br>36556 | 0.6005<br>9     | 1.5163<br>36556 | Up | 0.0159<br>56414 | 0.9845<br>43317 |

|            |           |                                                       |                  |                  |                  |                  |                  |                  |                 |                 |                 |    |                 |                 |
|------------|-----------|-------------------------------------------------------|------------------|------------------|------------------|------------------|------------------|------------------|-----------------|-----------------|-----------------|----|-----------------|-----------------|
| 3312       | HSP<br>A8 | Heat shock<br>protein family A<br>(Hsp70) member<br>8 | 10.0<br>961<br>7 | 10.2<br>572<br>4 | 10.4<br>063<br>1 | 10.6<br>079<br>7 | 11.5<br>586<br>2 | 11.8<br>089<br>6 | 2.1022<br>63243 | 1.0719<br>43333 | 2.1022<br>63243 | Up | 0.0127<br>93567 | 0.9845<br>43317 |
| 1016       | CDH<br>18 | Cadherin 18, type<br>2                                | 3.28<br>266      | 3.64<br>847      | 3.57<br>381      | 5.42<br>958      | 4.48<br>104      | 4.15<br>033      | 2.2741<br>64583 | 1.1853<br>36667 | 2.2741<br>64583 | Up | 0.0090<br>98318 | 0.9845<br>43317 |
| 1893       | ECM<br>1  | Extracellular<br>matrix protein 1                     | 5.62<br>869      | 6.21<br>136      | 6.15<br>15       | 6.83<br>232      | 6.77<br>343      | 6.23<br>086      | 1.5315<br>79229 | 0.6150<br>2     | 1.5315<br>79229 | Up | 0.0418<br>5254  | 0.9845<br>43317 |
| 9317       | PTER      | Phosphotriesteras<br>e related                        | 3.21<br>449      | 3.93<br>808      | 3.67<br>125      | 5.01<br>011      | 3.89<br>625      | 4.32<br>171      | 1.7428<br>11655 | 0.8014<br>16667 | 1.7428<br>11655 | Up | 0.0403<br>964   | 0.9845<br>43317 |
| 9975       | NR1<br>D2 | Nuclear receptor<br>subfamily 1 group<br>D member 2   | 3.63<br>253      | 4.27<br>309      | 4.70<br>157      | 4.94<br>998      | 5.28<br>136      | 4.71<br>676      | 1.7174<br>91946 | 0.7803<br>03333 | 1.7174<br>91946 | Up | 0.0339<br>31615 | 0.9845<br>43317 |
| 3924<br>65 | GLO<br>D5 | Glyoxalase<br>domain<br>containing 5                  | 3.28<br>507      | 4.28<br>237      | 3.48<br>159      | 5.19<br>657      | 4.35<br>188      | 4.50<br>226      | 2.0007<br>76476 | 1.0005<br>6     | 2.0007<br>76476 | Up | 0.0196<br>24845 | 0.9845<br>43317 |
| 7429       | VIL1      | Villin 1                                              | 8.13             | 9.27             | 9.39             | 10.1             | 9.53             | 9.75             | 1.8575          | 0.8933          | 1.8575          | Up | 0.0483          | 0.9845          |

|      |      |                                         |      |      |      |      |      |      |         |         |        |      |        |        |
|------|------|-----------------------------------------|------|------|------|------|------|------|---------|---------|--------|------|--------|--------|
|      |      |                                         | 472  | 711  | 517  | 925  | 818  | 641  | 01445   | 63333   | 01445  |      | 71728  | 43317  |
| 2580 | SVIP | Small                                   | 4.51 | 5.62 | 5.32 | 5.69 | 5.95 | 6.20 | 1.7339  | 0.7940  | 1.7339 | Up   | 0.0388 | 0.9845 |
| 10   |      | VCP/p97-interacting protein             | 47   | 661  | 393  | 084  | 1    | 547  | 0317    | 23333   | 0317   |      | 86246  | 43317  |
| 4311 | MME  | Membrane metallo-endopeptidase          | 4.68 | 6.09 | 5.60 | 6.47 | 6.51 | 6.55 | 2.0740  | 1.0524  | 2.0740 | Up   | 0.0204 | 0.9845 |
|      |      |                                         | 478  | 163  | 641  | 271  | 126  | 611  | 05903   | 2       | 05903  |      | 57452  | 43317  |
| 8470 | BEX  | Brain expressed X-linked 2              | 6.63 | 7.99 | 7.36 | 8.43 | 8.12 | 8.00 | 1.8128  | 0.8582  | 1.8128 | Up   | 0.0448 | 0.9845 |
| 7    | 2    |                                         | 786  | 549  | 425  | 954  | 304  | 974  | 25425   | 4       | 25425  |      | 32913  | 43317  |
| 2286 | NLR  | NLR family, pyrin domain containing 1   | 5.35 | 4.00 | 4.41 | 3.64 | 3.50 | 3.71 | -1.9565 | -0.9683 | 1.9565 | Down | 0.0233 | 0.9845 |
| 1    | P1   |                                         | 728  | 116  | 804  | 86   | 544  | 742  | 88002   | 4       | 88002  |      | 66963  | 43317  |
| 8574 | AKR  | Aldo-keto reductase family 7, member A2 | 5.60 | 6.03 | 6.06 | 6.66 | 6.45 | 6.45 | 1.5387  | 0.6217  | 1.5387 | Up   | 0.0119 | 0.9845 |
|      | 7A2  |                                         | 619  | 437  | 937  | 709  | 019  | 802  | 83217   | 9       | 83217  |      | 67809  | 43317  |
| 4093 | SMA  | SMAD family member 9                    | 5.27 | 5.16 | 5.19 | 6.24 | 5.91 | 5.47 | 1.5885  | 0.6677  | 1.5885 | Up   | 0.0181 | 0.9845 |
|      | D9   |                                         | 615  | 344  | 172  | 706  | 354  | 386  | 5679    | 16667   | 5679   |      | 72334  | 43317  |



|      |              |                                                                                                    |             |             |             |             |             |             |                  |                  |                 |      |                 |                 |
|------|--------------|----------------------------------------------------------------------------------------------------|-------------|-------------|-------------|-------------|-------------|-------------|------------------|------------------|-----------------|------|-----------------|-----------------|
| 5091 | PC           | Pyruvate<br>carboxylase                                                                            | 7.44<br>502 | 5.66<br>709 | 5.73<br>504 | 5.54<br>43  | 4.80<br>076 | 4.85<br>207 | -2.3241<br>01914 | -1.2166<br>73333 | 2.3241<br>01914 | Down | 0.0496<br>73598 | 0.9845<br>43317 |
| 12   | SERP<br>INA3 | Serpin peptidase<br>inhibitor, clade A<br>(alpha-1<br>antiproteinase,<br>antitrypsin),<br>member 3 | 9.56<br>178 | 6.78<br>279 | 9.90<br>906 | 5.97<br>187 | 6.73<br>813 | 6.30<br>431 | -5.3262<br>00235 | -2.4131<br>06667 | 5.3262<br>00235 | Down | 0.0213<br>91492 | 0.9845<br>43317 |
| 4884 | NPT<br>X1    | Neuronal<br>pentraxin I                                                                            | 4.09<br>585 | 4.41<br>62  | 4.93<br>406 | 4.89<br>209 | 5.98<br>764 | 6.29<br>301 | 2.3656<br>06315  | 1.2422<br>1      | 2.3656<br>06315 | Up   | 0.0185<br>43546 | 0.9845<br>43317 |
| 4337 | MOC<br>S1    | Molybdenum<br>cofactor synthesis<br>1                                                              | 5.02<br>087 | 4.21<br>165 | 4.13<br>603 | 3.61<br>81  | 3.85<br>993 | 4.01<br>346 | -1.5429<br>45032 | -0.6256<br>86667 | 1.5429<br>45032 | Down | 0.0460<br>94105 | 0.9845<br>43317 |
| 1398 | CRK          | V-crk avian<br>sarcoma virus<br>CT10 oncogene<br>homolog                                           | 5.09<br>705 | 5.03<br>338 | 5.78<br>029 | 5.57<br>192 | 6.09<br>188 | 6.46<br>167 | 1.6681<br>51131  | 0.7382<br>5      | 1.6681<br>51131 | Up   | 0.0459<br>81631 | 0.9845<br>43317 |

|                   |                             |                                                          |             |             |             |             |             |             |                  |                 |                 |      |                 |                 |
|-------------------|-----------------------------|----------------------------------------------------------|-------------|-------------|-------------|-------------|-------------|-------------|------------------|-----------------|-----------------|------|-----------------|-----------------|
| 717               | C2                          | Complement component 2                                   | 7.73<br>207 | 7.30<br>301 | 6.89<br>655 | 6.71<br>272 | 6.28<br>609 | 6.56<br>957 | -1.7263<br>79932 | -0.7877<br>5    | 1.7263<br>79932 | Down | 0.0170<br>73827 | 0.9845<br>43317 |
| 7977<br>2         | MCT<br>P1                   | Multiple C2 domains, transmembrane 1                     | 4.39<br>319 | 5.29<br>644 | 4.53<br>471 | 5.53<br>446 | 5.16<br>04  | 5.39<br>923 | 1.5403<br>41246  | 0.6232<br>5     | 1.5403<br>41246 | Up   | 0.0499<br>55569 | 0.9845<br>43317 |
| 1226<br>18        | PLD4                        | Phospholipase D family member 4                          | 4.32<br>07  | 5.20<br>706 | 4.99<br>39  | 5.71<br>481 | 5.36<br>243 | 5.46<br>74  | 1.5958<br>51784  | 0.6743<br>26667 | 1.5958<br>51784 | Up   | 0.0332<br>54176 | 0.9845<br>43317 |
| 1706<br>88        | NUD<br>T4P2                 | Nudix hydrolase 4 pseudogene 2                           | 7.94<br>991 | 8.72<br>461 | 7.05<br>272 | 8.70<br>06  | 9.27<br>632 | 9.22<br>821 | 2.2334<br>85156  | 1.1592<br>96667 | 2.2334<br>85156 | Up   | 0.0308<br>78175 | 0.9845<br>43317 |
| 1008<br>6154<br>0 | CYP3<br>A7-C<br>YP3<br>A51P | CYP3A7-CYP3A51P readthrough                              | 3.08<br>086 | 3.18<br>838 | 4.07<br>637 | 4.80<br>214 | 4.14<br>723 | 4.14<br>12  | 1.8855<br>51646  | 0.9149<br>86667 | 1.8855<br>51646 | Up   | 0.0235<br>28165 | 0.9845<br>43317 |
| 9058              | SLC1<br>3A2                 | Solute carrier family 13 (sodium-dependent dicarboxylate | 5.79<br>316 | 6.90<br>109 | 7.00<br>095 | 7.60<br>119 | 7.58<br>437 | 7.59<br>85  | 2.0414<br>86461  | 1.0296<br>2     | 2.0414<br>86461 | Up   | 0.0180<br>18592 | 0.9845<br>43317 |

|                   |                          |                                                                                                   |             |             |             |             |             |             |                 |                 |                 |      |                 |                 |
|-------------------|--------------------------|---------------------------------------------------------------------------------------------------|-------------|-------------|-------------|-------------|-------------|-------------|-----------------|-----------------|-----------------|------|-----------------|-----------------|
|                   |                          | transporter),<br>member 2                                                                         |             |             |             |             |             |             |                 |                 |                 |      |                 |                 |
| 9056              | SLC7<br>A7               | Solute carrier<br>family 7 (amino<br>acid transporter<br>light chain, y+L<br>system), member<br>7 | 7.44<br>138 | 8.11<br>803 | 8.22<br>125 | 8.62<br>044 | 8.63<br>059 | 8.29<br>888 | 1.5049<br>85931 | 0.5897<br>5     | 1.5049<br>85931 | Up   | 0.0488<br>92039 | 0.9845<br>43317 |
| 1096<br>3         | STIP<br>1                | Stress induced<br>phosphoprotein 1                                                                | 5.16<br>927 | 4.90<br>964 | 5.63<br>706 | 5.65<br>051 | 5.68<br>909 | 6.20<br>934 | 1.5273<br>06911 | 0.6109<br>9     | 1.5273<br>06911 | Up   | 0.0458<br>783   | 0.9845<br>43317 |
| 1019<br>2816<br>8 | LOC<br>1019<br>2816<br>8 | Uncharacterized<br>LOC101928168                                                                   | 6.36<br>212 | 6.49<br>398 | 6.06<br>64  | 6.91<br>83  | 6.80<br>026 | 7.45<br>065 | 1.6805<br>14899 | 0.7489<br>03333 | 1.6805<br>14899 | Up   | 0.0139<br>06039 | 0.9845<br>43317 |
| 2300<br>8         | KLH<br>DC10              | Kelch domain<br>containing 10                                                                     | 7.77<br>557 | 6.24<br>545 | 6.37<br>059 | 8.11<br>342 | 7.40<br>668 | 8.06<br>662 | 2.0922<br>23054 | 1.0650<br>36667 | 2.0922<br>23054 | Up   | 0.0490<br>83003 | 0.9845<br>43317 |
| 1451              | B3G                      | B                                                                                                 | 4.77        | 5.35        | 5.31        | 3.48        | 4.90        | 3.40        | -2.3189         | -1.2134         | 2.3189          | Down | 0.0252          | 0.9845          |

|            |                 |                                                          |             |             |             |             |             |             |                 |                 |                 |    |                 |                 |
|------------|-----------------|----------------------------------------------------------|-------------|-------------|-------------|-------------|-------------|-------------|-----------------|-----------------|-----------------|----|-----------------|-----------------|
| 73         | LCT             | 3-glucosyltransferase                                    | 183         | 961         | 066         | 851         | 857         | 464         | 31172           | 6               | 31172           |    | 18824           | 43317           |
| 3405<br>47 | VSIG<br>1       | V-set and immunoglobulin domain containing 1             | 4.09<br>903 | 5.42<br>272 | 4.50<br>43  | 5.81<br>982 | 5.65<br>202 | 5.31<br>323 | 1.8916<br>86914 | 0.9196<br>73333 | 1.8916<br>86914 | Up | 0.0346<br>45326 | 0.9845<br>43317 |
| 1441<br>10 | TME<br>M86<br>A | Transmembrane protein 86A                                | 5.22<br>769 | 5.58<br>948 | 4.92<br>738 | 6.00<br>689 | 5.80<br>018 | 5.92<br>911 | 1.5843<br>34174 | 0.6638<br>76667 | 1.5843<br>34174 | Up | 0.0133<br>0795  | 0.9845<br>43317 |
| 1149<br>07 | FBX<br>O32      | F-box protein 32                                         | 6.42<br>353 | 6.78<br>172 | 6.20<br>567 | 7.01<br>046 | 7.23<br>952 | 7.14<br>021 | 1.5798<br>1614  | 0.6597<br>56667 | 1.5798<br>1614  | Up | 0.0117<br>16424 | 0.9845<br>43317 |
| 1124       | CHN<br>2        | Chimerin 2                                               | 6.36<br>212 | 6.49<br>398 | 6.06<br>64  | 6.91<br>83  | 6.80<br>026 | 7.45<br>065 | 1.6805<br>14899 | 0.7489<br>03333 | 1.6805<br>14899 | Up | 0.0139<br>06039 | 0.9845<br>43317 |
| 292        | SLC2<br>5A5     | Solute carrier family 25 (mitochondrial carrier; adenine | 9.96<br>518 | 10.6<br>068 | 10.6<br>481 | 10.9<br>515 | 10.8<br>494 | 11.2<br>186 | 1.5155<br>30969 | 0.5998<br>23333 | 1.5155<br>30969 | Up | 0.0341<br>87988 | 0.9845<br>43317 |

|                   |                    |                                               |             |             |             |             |             |             |                  |                  |                 |      |                 |                 |
|-------------------|--------------------|-----------------------------------------------|-------------|-------------|-------------|-------------|-------------|-------------|------------------|------------------|-----------------|------|-----------------|-----------------|
|                   |                    | nucleotide translocator), member 5            |             |             |             |             |             |             |                  |                  |                 |      |                 |                 |
| 2865<br>30        | P2RY<br>8          | Purinergic receptor P2Y, G-protein coupled, 8 | 6.23<br>21  | 4.64<br>575 | 6.55<br>598 | 4.28<br>532 | 4.00<br>296 | 4.91<br>643 | -2.6568<br>31378 | -1.4097<br>06667 | 2.6568<br>31378 | Down | 0.0319<br>98947 | 0.9845<br>43317 |
| 1005<br>2924<br>1 | HSPE<br>1-MO<br>B4 | HSPE1-MOB4 readthrough                        | 8.78<br>167 | 9.03<br>133 | 9.22<br>59  | 9.61<br>348 | 9.48<br>9   | 10.1<br>579 | 1.6707<br>74079  | 0.7405<br>16667  | 1.6707<br>74079 | Up   | 0.0146<br>8503  | 0.9845<br>43317 |
| 2918              | GRM<br>8           | Glutamate receptor, metabotropic 8            | 4.82<br>252 | 6.26<br>7   | 4.27<br>592 | 5.96<br>9   | 6.71<br>442 | 6.57<br>392 | 2.4576<br>84969  | 1.2973           | 2.4576<br>84969 | Up   | 0.0413<br>10061 | 0.9845<br>43317 |
| 5520<br>7         | ARL<br>8B          | ADP ribosylation factor like gtpase 8B        | 4.23<br>757 | 4.44<br>026 | 5.19<br>913 | 5.25<br>095 | 5.37<br>108 | 5.51<br>666 | 1.6863<br>57017  | 0.7539<br>1      | 1.6863<br>57017 | Up   | 0.0249<br>3227  | 0.9845<br>43317 |
| 2292              | ATF6               | Activating                                    | 3.87        | 4.65        | 4.66        | 5.21        | 4.96        | 4.80        | 1.5127           | 0.5971           | 1.5127          | Up   | 0.0479          | 0.9845          |

|        |            |                                             |             |             |             |             |             |             |                  |                  |                 |      |                 |                 |
|--------|------------|---------------------------------------------|-------------|-------------|-------------|-------------|-------------|-------------|------------------|------------------|-----------------|------|-----------------|-----------------|
| 6      |            | transcription factor 6                      | 927         | 411         | 728         | 611         | 913         | 691         | 39251            | 63333            | 39251           |      | 73605           | 43317           |
| 29948  | OSGI<br>N1 | Oxidative stress induced growth inhibitor 1 | 6.69<br>485 | 7.34<br>503 | 7.68<br>686 | 7.84<br>135 | 8.09<br>302 | 8.11<br>012 | 1.7083<br>26027  | 0.7725<br>83333  | 1.7083<br>26027 | Up   | 0.0258<br>72538 | 0.9845<br>43317 |
| 441478 | NRA<br>RP  | NOTCH-regulate d ankyrin repeat protein     | 6.71<br>516 | 7.32<br>901 | 7.07<br>175 | 7.78<br>116 | 7.95<br>987 | 7.45<br>671 | 1.6176<br>95417  | 0.6939<br>4      | 1.6176<br>95417 | Up   | 0.0179<br>58564 | 0.9845<br>43317 |
| 3221   | HOX<br>C4  | Homeobox C4                                 | 5.84<br>929 | 5.02<br>388 | 5.20<br>445 | 4.67<br>414 | 4.78<br>232 | 4.72<br>506 | -1.5497<br>47668 | -0.6320<br>33333 | 1.5497<br>47668 | Down | 0.0285<br>1125  | 0.9845<br>43317 |
| 440515 | ZNF5<br>06 | Zinc finger protein 506                     | 4.95<br>326 | 4.38<br>157 | 5.06<br>736 | 2.93<br>256 | 4.11<br>428 | 3.21<br>105 | -2.6052<br>70791 | -1.3814<br>33333 | 2.6052<br>70791 | Down | 0.0052<br>03406 | 0.9845<br>43317 |
| 4069   | LYZ        | Lysozyme                                    | 6.95<br>675 | 7.94<br>635 | 9.04<br>6   | 9.75<br>43  | 10.0<br>746 | 10.4<br>146 | 4.2816<br>49401  | 2.0981<br>66667  | 4.2816<br>49401 | Up   | 0.0051<br>69511 | 0.9845<br>43317 |
| 5791   | PTPR<br>E  | Protein tyrosine phosphatase,               | 6.42<br>408 | 5.77<br>979 | 6.40<br>078 | 5.58<br>441 | 5.40<br>498 | 4.90<br>077 | -1.8723<br>23857 | -0.9048<br>3     | 1.8723<br>23857 | Down | 0.0114<br>5427  | 0.9845<br>43317 |

|       |         |                                         |      |      |      |      |      |      |         |         |        |      |        |        |
|-------|---------|-----------------------------------------|------|------|------|------|------|------|---------|---------|--------|------|--------|--------|
|       |         | receptor type, E                        |      |      |      |      |      |      |         |         |        |      |        |        |
| 4064  | CD180   | CD180 molecule                          | 5.46 | 4.94 | 5.98 | 4.91 | 4.52 | 4.76 | -1.6589 | -0.7302 | 1.6589 | Down | 0.0341 | 0.9845 |
|       | 0       |                                         | 33   | 424  | 171  | 091  | 33   | 431  | 18871   | 43333   | 18871  |      | 79795  | 43317  |
| 9032  | TM4SF5  | Transmembrane 4 L six family member 5   | 7.48 | 8.34 | 7.55 | 9.26 | 8.49 | 8.24 | 1.8258  | 0.8685  | 1.8258 | Up   | 0.0432 | 0.9845 |
|       |         |                                         | 615  | 996  | 443  | 35   | 257  | 014  | 35343   | 56667   | 35343  |      | 72415  | 43317  |
| 55339 | WDR33   | WD repeat domain 33                     | 4.51 | 4.50 | 4.32 | 4.74 | 5.35 | 5.14 | 1.5487  | 0.6311  | 1.5487 | Up   | 0.0112 | 0.9845 |
|       |         |                                         | 882  | 865  | 977  | 706  | 941  | 409  | 5256    | 06667   | 5256   |      | 91783  | 43317  |
| 51233 | DRIC H1 | Aspartate-rich 1                        | 3.80 | 4.50 | 4.19 | 4.85 | 4.59 | 5.23 | 1.6606  | 0.7317  | 1.6606 | Up   | 0.0193 | 0.9845 |
|       |         |                                         | 009  | 654  | 133  | 564  | 8    | 967  | 90624   | 83333   | 90624  |      | 11424  | 43317  |
| 335   | APOA1   | Apolipoprotein A-I                      | 6.97 | 6.96 | 6.20 | 8.47 | 7.75 | 8.74 | 3.0591  | 1.6131  | 3.0591 | Up   | 0.0021 | 0.9845 |
|       |         |                                         | 141  | 21   | 648  | 954  | 603  | 376  | 1286    | 13333   | 1286   |      | 39261  | 43317  |
| 4888  | NPY6R   | Neuropeptide Y receptor Y6 (pseudogene) | 5.06 | 5.80 | 5.22 | 6.09 | 6.08 | 6.11 | 1.6599  | 0.7311  | 1.6599 | Up   | 0.0123 | 0.9845 |
|       |         |                                         | 415  | 592  | 999  | 835  | 087  | 438  | 9627    | 8       | 9627   |      | 98283  | 43317  |
| 6281  | S100A10 | S100 calcium binding protein            | 10.9 | 9.59 | 10.0 | 9.44 | 9.42 | 9.18 | -1.8395 | -0.8793 | 1.8395 | Down | 0.0407 | 0.9845 |
|       |         |                                         | 873  | 624  | 998  | 224  | 181  | 126  | 42065   | 46667   | 42065  |      | 91502  | 43317  |

|      |      |                              |      |      |      |      |      |      |         |         |        |      |        |        |
|------|------|------------------------------|------|------|------|------|------|------|---------|---------|--------|------|--------|--------|
|      |      | A10                          |      |      | 1    |      |      |      |         |         |        |      |        |        |
| 6485 | USP4 | Ubiquitin specific           | 5.11 | 4.94 | 5.11 | 5.33 | 5.75 | 5.91 | 1.5237  | 0.6076  | 1.5237 | Up   | 0.0147 | 0.9845 |
| 4    | 6    | peptidase 46                 | 964  | 448  | 929  | 263  | 501  | 868  | 61033   | 36667   | 61033  |      | 71242  | 43317  |
| 7177 | TPSA | Tryptase $\alpha/\beta$ 1    | 8.38 | 8.64 | 8.30 | 8.76 | 9.04 | 9.53 | 1.5925  | 0.6713  | 1.5925 | Up   | 0.0239 | 0.9845 |
|      | B1   |                              | 641  | 308  | 774  | 869  | 42   | 842  | 73548   | 6       | 73548  |      | 29839  | 43317  |
| 350  | APO  | Apolipoprotein H             | 5.17 | 6.05 | 6.06 | 6.77 | 6.59 | 6.97 | 2.0226  | 1.0162  | 2.0226 | Up   | 0.0089 | 0.9845 |
|      | H    | ( $\beta$ -2-glycoprotein I) | 747  | 771  | 636  | 987  | 211  | 84   | 96691   | 8       | 96691  |      | 76808  | 43317  |
| 1272 | TPR  | Tumor protein                | 6.70 | 6.83 | 7.44 | 7.43 | 7.84 | 7.73 | 1.5978  | 0.6761  | 1.5978 | Up   | 0.0273 | 0.9845 |
| 62   | G1L  | p63 regulated<br>1-like      | 613  | 794  | 113  | 028  | 845  | 497  | 88418   | 66667   | 88418  |      | 35665  | 43317  |
| 8447 | DOC  | Double C2-like               | 7.26 | 5.92 | 5.76 | 4.67 | 5.28 | 5.62 | -2.1775 | -1.1226 | 2.1775 | Down | 0.0428 | 0.9845 |
|      | 2B   | domains, $\beta$             | 53   | 974  | 117  | 499  | 603  | 712  | 26083   | 9       | 26083  |      | 50751  | 43317  |
| 2305 | END  | Endonuclease                 | 7.28 | 7.70 | 7.44 | 7.33 | 6.18 | 5.97 | -1.9770 | -0.9833 | 1.9770 | Down | 0.0336 | 0.9845 |
| 2    | OD1  | domain<br>containing 1       | 837  | 881  | 988  | 576  | 527  | 591  | 82856   | 73333   | 82856  |      | 35992  | 43317  |
| 5168 | ENPP | Ectonucleotide               | 7.49 | 7.35 | 6.95 | 8.06 | 7.82 | 7.84 | 1.5614  | 0.6429  | 1.5614 | Up   | 0.0126 | 0.9845 |



|            |              |                                             |             |             |             |             |             |             |                 |                 |                 |    |                 |                 |
|------------|--------------|---------------------------------------------|-------------|-------------|-------------|-------------|-------------|-------------|-----------------|-----------------|-----------------|----|-----------------|-----------------|
|            | 2            | pyrophosphatase/<br>phosphodiesterase<br>2  | 341         | 066         | 512         | 32          | 198         | 276         | 82788           | 16667           | 82788           |    | 65517           | 43317           |
| 9500       | MAG<br>ED1   | MAGE family<br>member D1                    | 8.24<br>641 | 9.28<br>675 | 8.99<br>486 | 9.39<br>216 | 9.71<br>645 | 9.54<br>813 | 1.6353<br>20411 | 0.7095<br>73333 | 1.6353<br>20411 | Up | 0.0418<br>27339 | 0.9845<br>43317 |
| 2147       | F2           | Coagulation<br>factor II<br>(thrombin)      | 6.48<br>685 | 6.93<br>971 | 7.10<br>44  | 7.54<br>237 | 7.24<br>188 | 7.67<br>245 | 1.5603<br>9722  | 0.6419<br>13333 | 1.5603<br>9722  | Up | 0.0229<br>47841 | 0.9845<br>43317 |
| 1159       | CKM<br>T1B   | Creatine kinase,<br>mitochondrial 1B        | 7.76<br>828 | 8.70<br>526 | 8.57<br>227 | 9.12<br>401 | 8.82<br>889 | 9.40<br>338 | 1.7054<br>54974 | 0.7701<br>56667 | 1.7054<br>54974 | Up | 0.0351<br>50218 | 0.9845<br>43317 |
| 5412       | UBL<br>3     | Ubiquitin like 3                            | 5.43<br>734 | 5.86<br>081 | 6.36<br>148 | 6.55<br>774 | 6.61<br>711 | 7.00<br>531 | 1.7902<br>69358 | 0.8401<br>76667 | 1.7902<br>69358 | Up | 0.0179<br>27056 | 0.9845<br>43317 |
| 5131<br>6  | PLA<br>C8    | Placenta specific<br>8                      | 4.58<br>949 | 4.59<br>34  | 5.10<br>885 | 5.15<br>017 | 6.23<br>335 | 5.90<br>012 | 1.9962<br>60506 | 0.9973          | 1.9962<br>60506 | Up | 0.0153<br>54393 | 0.9845<br>43317 |
| 2842<br>66 | SIGL<br>EC15 | Sialic acid<br>binding Ig-like<br>lectin 15 | 5.30<br>928 | 5.47<br>839 | 5.42<br>684 | 6.43<br>809 | 6.27<br>643 | 6.11<br>624 | 1.8303<br>04056 | 0.8720<br>83333 | 1.8303<br>04056 | Up | 0.0007<br>82001 | 0.9845<br>43317 |

|            |                    |                                                                |             |             |             |             |             |             |                  |                  |                 |      |                 |                 |
|------------|--------------------|----------------------------------------------------------------|-------------|-------------|-------------|-------------|-------------|-------------|------------------|------------------|-----------------|------|-----------------|-----------------|
| 1043<br>7  | IFI30              | Interferon,<br>$\gamma$ -inducible<br>protein 30               | 9.41<br>428 | 8.94<br>371 | 8.86<br>213 | 8.62<br>474 | 8.15<br>385 | 8.20<br>67  | -1.6759<br>08441 | -0.7449<br>43333 | 1.6759<br>08441 | Down | 0.0121<br>8156  | 0.9845<br>43317 |
| 1122<br>7  | GAL<br>NT5         | Polypeptide<br>N-acetylgalactosa<br>minyltransferase 5         | 4.48<br>587 | 5.15<br>488 | 5.15<br>143 | 6.16<br>352 | 5.56<br>161 | 5.56<br>634 | 1.7815<br>05166  | 0.8330<br>96667  | 1.7815<br>05166 | Up   | 0.0166<br>57785 | 0.9845<br>43317 |
| 1236<br>7  | CCR<br>7           | Chemokine (C-C<br>motif) receptor 7                            | 4.71<br>847 | 4.43<br>796 | 5.22<br>345 | 4.07<br>075 | 4.12<br>524 | 3.94<br>766 | -1.6764<br>50633 | -0.7454<br>1     | 1.6764<br>50633 | Down | 0.0098<br>8378  | 0.9845<br>43317 |
| 140        | ADO<br>RA3         | Adenosine A3<br>receptor                                       | 4.55<br>64  | 4.23<br>61  | 5.03<br>035 | 5.20<br>362 | 5.55<br>607 | 6.02<br>88  | 1.9841<br>85167  | 0.9885<br>46667  | 1.9841<br>85167 | Up   | 0.0111<br>33289 | 0.9845<br>43317 |
| 4404<br>82 | ANK<br>RD20<br>A5P | Ankyrin repeat<br>domain 20 family<br>member A5,<br>pseudogene | 5.87<br>277 | 6.29<br>94  | 6.13<br>31  | 7.07<br>794 | 6.70<br>578 | 6.65<br>589 | 1.6374<br>45247  | 0.7114<br>46667  | 1.6374<br>45247 | Up   | 0.0083<br>73927 | 0.9845<br>43317 |
| 4907       | NT5E               | 5'-nucleotidase,<br>ecto (CD73)                                | 4.80<br>951 | 5.59<br>635 | 4.98<br>493 | 5.71<br>846 | 6.19<br>203 | 6.25<br>617 | 1.8990<br>6594   | 0.9252<br>9      | 1.8990<br>6594  | Up   | 0.0100<br>15137 | 0.9845<br>43317 |
| 5436       | CYT                | Cytokine like 1                                                | 5.21        | 4.66        | 4.57        | 5.48        | 5.56        | 6.43        | 2.0084           | 1.0060           | 2.0084          | Up   | 0.0147          | 0.9845          |

|           |            |                                                                                                  |             |             |             |             |             |             |                 |                 |                 |    |                 |                 |
|-----------|------------|--------------------------------------------------------------------------------------------------|-------------|-------------|-------------|-------------|-------------|-------------|-----------------|-----------------|-----------------|----|-----------------|-----------------|
| 0         | L1         |                                                                                                  | 346         | 467         | 977         | 422         | 012         | 174         | 18613           | 6               | 18613           |    | 69156           | 43317           |
| 2209      | FCG<br>R1A | Fc fragment of<br>igg, high affinity<br>Ia, receptor<br>(CD64)                                   | 5.02<br>935 | 5.64<br>109 | 4.73<br>691 | 5.82<br>116 | 6.06<br>513 | 5.86<br>193 | 1.7174<br>76073 | 0.7802<br>9     | 1.7174<br>76073 | Up | 0.0174<br>19884 | 0.9845<br>43317 |
| 6549      | SLC9<br>A2 | Solute carrier<br>family 9,<br>subfamily A<br>(NHE2, cation<br>proton antiporter<br>2), member 2 | 5.58<br>032 | 6.68<br>358 | 6.06<br>64  | 8.77<br>209 | 7.34<br>553 | 8.32<br>934 | 4.1092<br>82933 | 2.0388<br>86667 | 4.1092<br>82933 | Up | 0.0026<br>02688 | 0.9845<br>43317 |
| 1059<br>8 | AHS<br>A1  | AHA1, activator<br>of heat shock<br>90kda protein<br>atpase homolog 1<br>(yeast)                 | 6.91<br>967 | 6.95<br>717 | 6.80<br>871 | 7.37<br>942 | 7.25<br>034 | 7.85<br>035 | 1.5138<br>12649 | 0.5981<br>86667 | 1.5138<br>12649 | Up | 0.0196<br>1225  | 0.9845<br>43317 |
| 2834      | CLE        | C-type lectin                                                                                    | 3.78        | 3.72        | 3.48        | 4.12        | 4.86        | 4.78        | 1.8992          | 0.9254          | 1.8992          | Up | 0.0042          | 0.9845          |

|      |     |                                                 |      |      |      |      |      |      |        |        |        |    |        |        |
|------|-----|-------------------------------------------------|------|------|------|------|------|------|--------|--------|--------|----|--------|--------|
| 20   | C9A | domain family 9, member A                       | 697  | 959  | 126  | 436  | 345  | 632  | 59012  | 36667  | 59012  |    | 68823  | 43317  |
| 5714 | PAK | P21 protein                                     | 5.37 | 6.86 | 6.32 | 7.53 | 7.30 | 7.19 | 2.2295 | 1.1567 | 2.2295 | Up | 0.0186 | 0.9845 |
| 4    | 7   | (Cdc42/Rac)-activated kinase 7                  | 311  | 432  | 054  | 321  | 133  | 371  | 61507  | 6      | 61507  |    | 49543  | 43317  |
| 1926 | SCA | Secretory carrier                               | 6.85 | 7.23 | 7.13 | 7.68 | 7.57 | 7.79 | 1.5267 | 0.6104 | 1.5267 | Up | 0.0081 | 0.9845 |
| 83   | MP5 | membrane protein 5                              | 663  | 731  | 299  | 719  | 987  | 128  | 56513  | 7      | 56513  |    | 11574  | 43317  |
| 7384 | UQC | Ubiquinol-cytochrome c reductase core protein I | 7.95 | 8.64 | 8.74 | 9.13 | 8.94 | 9.31 | 1.6038 | 0.6815 | 1.6038 | Up | 0.0293 | 0.9845 |
|      | RC1 |                                                 | 487  | 287  | 76   | 442  | 215  | 347  | 80513  | 66667  | 80513  |    | 33308  | 43317  |
| 2911 | MYL | Myosin regulatory                               | 6.48 | 7.37 | 5.97 | 7.50 | 8.06 | 8.00 | 2.3712 | 1.2456 | 2.3712 | Up | 0.0132 | 0.9845 |
| 6    | IP  | light chain interacting protein                 | 646  | 281  | 401  | 726  | 077  | 213  | 15308  | 26667  | 15308  |    | 94069  | 43317  |
| 409  | ARR | Arrestin, $\beta$ 2                             | 6.21 | 5.98 | 5.25 | 6.63 | 6.49 | 6.35 | 1.6000 | 0.6781 | 1.6000 | Up | 0.0408 | 0.9845 |
|      | B2  |                                                 | 669  | 742  | 525  | 804  | 793  | 784  | 86612  | 5      | 86612  |    | 2102   | 43317  |
| 5575 | OGD | Oxoglutarate                                    | 5.25 | 5.91 | 4.94 | 6.62 | 6.40 | 6.48 | 2.1934 | 1.1332 | 2.1934 | Up | 0.0040 | 0.9845 |

|      |      |                                        |      |      |      |      |      |      |        |        |        |    |        |        |
|------|------|----------------------------------------|------|------|------|------|------|------|--------|--------|--------|----|--------|--------|
| 3    | HL   | dehydrogenase-like                     | 666  | 72   | 12   | 718  | 701  | 053  | 7764   | 2      | 7764   |    | 19479  | 43317  |
| 7977 | GRT  | Growth hormone                         | 5.15 | 6.75 | 6.20 | 7.15 | 7.26 | 7.12 | 2.2096 | 1.1438 | 2.2096 | Up | 0.0233 | 0.9845 |
| 4    | P1   | regulated TBC protein 1                | 916  | 515  | 185  | 484  | 803  | 475  | 53262  | 2      | 53262  |    | 94585  | 43317  |
| 1053 | LOC  | Uncharacterized                        | 4.22 | 4.47 | 3.52 | 4.98 | 5.29 | 5.69 | 2.3802 | 1.2510 | 2.3802 | Up | 0.0040 | 0.9845 |
| 7728 | 1053 | LOC105377283                           | 032  | 212  | 931  | 975  | 408  | 118  | 06374  | 86667  | 06374  |    | 98923  | 43317  |
| 3    | 7728 |                                        |      |      |      |      |      |      |        |        |        |    |        |        |
| 3    |      |                                        |      |      |      |      |      |      |        |        |        |    |        |        |
| 3248 | HPG  | Hydroxyprostagla                       | 6.63 | 7.42 | 6.84 | 7.33 | 7.73 | 7.61 | 1.5021 | 0.5869 | 1.5021 | Up | 0.0491 | 0.9845 |
|      | D    | ndin dehydrogenase 15-(NAD)            | 751  | 988  | 807  | 139  | 359  | 146  | 12986  | 93333  | 12986  |    | 99091  | 43317  |
| 1554 | AGR  | Anterior gradient                      | 6.86 | 8.27 | 8.24 | 8.43 | 9.07 | 9.09 | 2.1018 | 1.0716 | 2.1018 | Up | 0.0398 | 0.9845 |
| 65   | 3    | 3, protein disulphide isomerase family | 873  | 192  | 953  | 849  | 537  | 122  | 11567  | 33333  | 11567  |    | 85849  | 43317  |

|      |      |                   |      |      |      |      |      |      |        |        |        |    |        |        |
|------|------|-------------------|------|------|------|------|------|------|--------|--------|--------|----|--------|--------|
|      |      | member            |      |      |      |      |      |      |        |        |        |    |        |        |
| 1010 | PPIF | Peptidylprolyl    | 5.18 | 5.47 | 5.85 | 6.06 | 6.20 | 6.66 | 1.7523 | 0.8093 | 1.7523 | Up | 0.0135 | 0.9845 |
| 5    |      | isomerase F       | 159  | 868  | 025  | 359  | 704  | 779  | 60985  |        | 60985  |    | 97936  | 43317  |
| 1715 | ABH  | Abhydrolase       | 5.76 | 7.03 | 7.41 | 7.55 | 7.85 | 8.08 | 2.1267 | 1.0886 | 2.1267 | Up | 0.0407 | 0.9845 |
| 86   | D3   | domain            | 468  | 506  | 873  | 022  | 379  | 051  | 9847   | 83333  | 9847   |    | 5496   | 43317  |
|      |      | containing 3      |      |      |      |      |      |      |        |        |        |    |        |        |
| 5582 | PAG  | Phosphoprotein    | 8.85 | 9.62 | 9.67 | 9.89 | 10.0 | 10.1 | 1.5565 | 0.6383 | 1.5565 | Up | 0.0390 | 0.9845 |
| 4    | 1    | membrane anchor   | 497  | 518  | 358  | 239  | 028  | 736  | 83893  | 83333  | 83893  |    | 28654  | 43317  |
|      |      | with              |      |      |      |      |      | 9    |        |        |        |    |        |        |
|      |      | glycosphingolipid |      |      |      |      |      |      |        |        |        |    |        |        |
|      |      | microdomains 1    |      |      |      |      |      |      |        |        |        |    |        |        |
| 283  | ANG  | Angiogenin,       | 7.78 | 8.77 | 8.59 | 9.11 | 9.26 | 8.93 | 1.6505 | 0.7229 | 1.6505 | Up | 0.0380 | 0.9845 |
|      |      | ribonuclease,     | 47   | 871  | 112  | 508  | 94   | 885  | 34544  | 33333  | 34544  |    | 46933  | 43317  |
|      |      | rnase A family, 5 |      |      |      |      |      |      |        |        |        |    |        |        |
| 4588 | MUC  | Mucin 6,          | 7.34 | 9.34 | 9.77 | 10.8 | 9.77 | 10.5 | 2.9416 | 1.5566 | 2.9416 | Up | 0.0495 | 0.9845 |
|      | 6    | oligomeric        | 869  | 381  | 914  | 643  | 399  | 032  | 38574  | 2      | 38574  |    | 92732  | 43317  |
|      |      | mucus/gel-formin  |      |      |      |      |      | 1    |        |        |        |    |        |        |

|      |      |                                                                         |      |      |      |      |      |      |         |         |        |      |        |        |
|------|------|-------------------------------------------------------------------------|------|------|------|------|------|------|---------|---------|--------|------|--------|--------|
|      |      | g                                                                       |      |      |      |      |      |      |         |         |        |      |        |        |
| 5583 | CEN  | Centromere                                                              | 4.24 | 4.75 | 4.58 | 5.38 | 4.89 | 5.52 | 1.6682  | 0.7383  | 1.6682 | Up   | 0.0128 | 0.9845 |
| 9    | PN   | protein N                                                               | 861  | 759  | 202  | 088  | 383  | 855  | 62908   | 46667   | 62908  |      | 60746  | 43317  |
| 6583 | SLC2 | Solute carrier                                                          | 6.16 | 5.30 | 5.70 | 5.13 | 4.96 | 4.81 | -1.6896 | -0.7567 | 1.6896 | Down | 0.0167 | 0.9845 |
|      | 2A4  | family 22<br>(organic<br>cation/zwitterion<br>transporter),<br>member 4 | 352  | 693  | 861  | 732  | 127  | 037  | 21385   |         | 21385  |      | 54863  | 43317  |
| 5796 | PTPR | Protein tyrosine                                                        | 3.71 | 4.22 | 4.02 | 5.00 | 4.55 | 4.59 | 1.6587  | 0.7300  | 1.6587 | Up   | 0.0065 | 0.9845 |
|      | K    | phosphatase,<br>receptor type, K                                        | 879  | 215  | 32   | 567  | 254  | 609  | 00409   | 53333   | 00409  |      | 26247  | 43317  |
| 9556 | C14o | Chromosome 14                                                           | 6.82 | 7.06 | 6.35 | 7.49 | 7.43 | 7.32 | 1.5917  | 0.6705  | 1.5917 | Up   | 0.0173 | 0.9845 |
|      | rf2  | open reading<br>frame 2                                                 | 025  | 968  | 441  | 834  | 773  | 001  | 12748   | 8       | 12748  |      | 3419   | 43317  |
| 3336 | HSPE | Heat shock                                                              | 8.78 | 9.03 | 9.22 | 9.61 | 9.48 | 10.1 | 1.6707  | 0.7405  | 1.6707 | Up   | 0.0146 | 0.9845 |
|      | 1    | protein family E                                                        | 167  | 133  | 59   | 348  | 9    | 579  | 74079   | 16667   | 74079  |      | 8503   | 43317  |

|           |           |                                                                          |                   |             |             |             |             |             |                 |                 |                 |    |                 |                 |
|-----------|-----------|--------------------------------------------------------------------------|-------------------|-------------|-------------|-------------|-------------|-------------|-----------------|-----------------|-----------------|----|-----------------|-----------------|
|           |           | (Hsp10) member<br>1                                                      |                   |             |             |             |             | 7           |                 |                 |                 |    |                 |                 |
| 8618      | CAD<br>PS | Ca <sup>++</sup> -dependent<br>secretion activator                       | 6.13<br>006       | 6.78<br>967 | 6.54<br>576 | 7.96<br>276 | 8.22<br>139 | 7.08<br>978 | 2.4107<br>46578 | 1.2694<br>8     | 2.4107<br>46578 | Up | 0.0074<br>55522 | 0.9845<br>43317 |
| 2580<br>5 | BAM<br>BI | BMP and activin<br>membrane-bound<br>inhibitor                           | 6.20<br>576       | 7.00<br>82  | 6.40<br>838 | 7.47<br>215 | 7.80<br>716 | 6.97<br>457 | 1.8367<br>81479 | 0.8771<br>8     | 1.8367<br>81479 | Up | 0.0227<br>04721 | 0.9845<br>43317 |
| 2861      | GPR3<br>7 | G protein-coupled<br>receptor<br>(endothelin<br>receptor type<br>B-like) | 4.36<br>37<br>111 | 5.58<br>643 | 4.82<br>764 | 5.61<br>596 | 6.13<br>29  | 5.47<br>765 | 1.7618<br>73079 | 0.8171<br>1     | 1.7618<br>73079 | Up | 0.0496<br>12669 | 0.9845<br>43317 |
| 8788      | DLK<br>1  | $\Delta$ -like 1 homolog<br>(Drosophila)                                 | 4.24<br>347       | 6.03<br>837 | 4.59<br>342 | 5.75<br>757 | 8.13<br>97  | 7.08<br>913 | 4.1040<br>45332 | 2.0370<br>46667 | 4.1040<br>45332 | Up | 0.0244<br>10656 | 0.9845<br>43317 |
| 1080<br>8 | HSP<br>H1 | Heat shock<br>protein family H<br>(Hsp110) member                        | 5.12<br>016       | 5.62<br>914 | 6.20<br>648 | 6.30<br>86  | 6.83<br>421 | 6.67<br>546 | 1.9374<br>55713 | 0.9541<br>63333 | 1.9374<br>55713 | Up | 0.0172<br>34577 | 0.9845<br>43317 |



|            |             |                                                                          |             |             |             |             |             |             |                  |                  |                 |      |                 |                 |
|------------|-------------|--------------------------------------------------------------------------|-------------|-------------|-------------|-------------|-------------|-------------|------------------|------------------|-----------------|------|-----------------|-----------------|
|            |             | 1                                                                        |             |             |             |             |             |             |                  |                  |                 |      |                 |                 |
| 3352       | HTR<br>1D   | 5-hydroxytryptam<br>ine (serotonin)<br>receptor 1D, G<br>protein-coupled | 5.61<br>007 | 6.61<br>992 | 6.00<br>329 | 6.78<br>689 | 6.83<br>965 | 6.64<br>462 | 1.6013<br>55181  | 0.6792<br>93333  | 1.6013<br>55181 | Up   | 0.0404<br>03688 | 0.9845<br>43317 |
| 4408<br>36 | ODF<br>3B   | Outer dense fiber<br>of sperm tails 3B                                   | 8.19<br>928 | 7.65<br>067 | 8.05<br>663 | 7.47<br>274 | 7.40<br>625 | 7.22<br>735 | -1.5158<br>00618 | -0.6000<br>8     | 1.5158<br>00618 | Down | 0.0173<br>55372 | 0.9845<br>43317 |
| 9829       | DNA<br>JC6  | Dnaj heat shock<br>protein family<br>(Hsp40) member<br>C6                | 5.04<br>077 | 5.16<br>208 | 4.98<br>623 | 5.76<br>319 | 5.68<br>135 | 5.94<br>548 | 1.6628<br>36898  | 0.7336<br>46667  | 1.6628<br>36898 | Up   | 0.0013<br>97096 | 0.9845<br>43317 |
| 2364<br>7  | ARFI<br>P2  | ADP ribosylation<br>factor interacting<br>protein 2                      | 5.33<br>127 | 5.66<br>05  | 5.77<br>209 | 6.04<br>439 | 5.85<br>84  | 6.67<br>085 | 1.5191<br>45443  | 0.6032<br>6      | 1.5191<br>45443 | Up   | 0.0494<br>88957 | 0.9845<br>43317 |
| 7127       | TNF<br>AIP2 | Tnf $\alpha$ -induced<br>protein 2                                       | 9.41<br>795 | 9.73<br>77  | 9.87<br>408 | 8.20<br>627 | 8.62<br>645 | 8.39<br>12  | -2.4092<br>82111 | -1.2686<br>03333 | 2.4092<br>82111 | Down | 0.0003<br>5729  | 0.9845<br>43317 |
| 1537       | CYC         | Cytochrome c-1                                                           | 8.65        | 9.08        | 8.78        | 9.49        | 9.18        | 9.69        | 1.5276           | 0.6113           | 1.5276          | Up   | 0.0183          | 0.9845          |

|           |              |                                                                     |             |             |             |             |             |             |                  |                  |                 |      |                 |                 |
|-----------|--------------|---------------------------------------------------------------------|-------------|-------------|-------------|-------------|-------------|-------------|------------------|------------------|-----------------|------|-----------------|-----------------|
|           | 1            |                                                                     | 796         | 706         | 423         | 002         | 219         | 096         | 42187            | 06667            | 42187           |      | 53348           | 43317           |
| 8363      | HIST<br>1H4J | Histone cluster 1,<br>h4j                                           | 8.25<br>122 | 8.45<br>981 | 8.90<br>68  | 8.92<br>262 | 9.28<br>796 | 9.16<br>953 | 1.5025<br>64234  | 0.5874<br>26667  | 1.5025<br>64234 | Up   | 0.0300<br>78133 | 0.9845<br>43317 |
| 5051      | PAF<br>AH2   | Platelet-activating<br>factor<br>acetylhydrolase 2                  | 3.90<br>226 | 5.09<br>269 | 5.18<br>461 | 5.74<br>365 | 5.68<br>691 | 5.37<br>417 | 1.8340<br>80125  | 0.8750<br>56667  | 1.8340<br>80125 | Up   | 0.0447<br>57953 | 0.9845<br>43317 |
| 1524      | CX3<br>CR1   | Chemokine<br>(C-X3-C motif)<br>receptor 1                           | 7.58<br>882 | 9.01<br>504 | 7.09<br>956 | 9.25<br>31  | 9.58<br>875 | 9.94<br>036 | 3.2331<br>26599  | 1.6929<br>3      | 3.2331<br>26599 | Up   | 0.0119<br>10209 | 0.9845<br>43317 |
| 8082<br>4 | DUS<br>P16   | Dual specificity<br>phosphatase 16                                  | 4.75<br>548 | 5.43<br>046 | 5.19<br>116 | 5.98<br>651 | 5.44<br>91  | 5.73<br>978 | 1.5151<br>17834  | 0.5994<br>3      | 1.5151<br>17834 | Up   | 0.0365<br>77464 | 0.9845<br>43317 |
| 2578<br>0 | RAS<br>GRP3  | RAS guanyl<br>releasing protein<br>3 (calcium and<br>DAG-regulated) | 6.21<br>067 | 5.89<br>315 | 6.53<br>161 | 5.34<br>429 | 5.65<br>298 | 5.58<br>651 | -1.6064<br>58079 | -0.6838<br>83333 | 1.6064<br>58079 | Down | 0.0133<br>24871 | 0.9845<br>43317 |
| 1654      | DDX<br>3X    | DEAD<br>(Asp-Glu-Ala-As                                             | 4.01<br>362 | 4.45<br>78  | 4.89<br>755 | 5.02<br>448 | 5.07<br>236 | 5.10<br>318 | 1.5266<br>29527  | 0.6103<br>5      | 1.5266<br>29527 | Up   | 0.0323<br>36386 | 0.9845<br>43317 |

|           |            |                                                                  |             |             |             |             |             |             |                  |                 |                 |      |                 |                 |
|-----------|------------|------------------------------------------------------------------|-------------|-------------|-------------|-------------|-------------|-------------|------------------|-----------------|-----------------|------|-----------------|-----------------|
|           |            | p) box helicase 3,<br>X-linked                                   |             |             |             |             |             |             |                  |                 |                 |      |                 |                 |
| 1021      | CDK<br>6   | Cyclin-dependent<br>kinase 6                                     | 7.08<br>398 | 6.75<br>83  | 7.10<br>094 | 6.13<br>997 | 6.20<br>701 | 6.76<br>063 | -1.5282<br>38806 | -0.6118<br>7    | 1.5282<br>38806 | Down | 0.0282<br>68843 | 0.9845<br>43317 |
| 3669      | ISG2<br>0  | Interferon<br>stimulated<br>exonuclease gene<br>20kda            | 9.89<br>465 | 10.9<br>159 | 10.3<br>568 | 11.7<br>182 | 11.4<br>472 | 11.0<br>129 | 2.0050<br>66381  | 1.0036<br>5     | 2.0050<br>66381 | Up   | 0.0143<br>08039 | 0.9845<br>43317 |
| 384       | ARG<br>2   | Arginase 2                                                       | 4.29<br>79  | 4.78<br>344 | 4.60<br>113 | 5.84<br>72  | 5.20<br>784 | 5.47<br>953 | 1.9328<br>10236  | 0.9507          | 1.9328<br>10236 | Up   | 0.0034<br>29022 | 0.9845<br>43317 |
| 1123      | CHN<br>1   | Chimerin 1                                                       | 4.25<br>305 | 4.38<br>322 | 3.89<br>039 | 4.70<br>842 | 4.56<br>107 | 5.01<br>682 | 1.5016<br>51464  | 0.5865<br>5     | 1.5016<br>51464 | Up   | 0.0165<br>27266 | 0.9845<br>43317 |
| 5741<br>3 | TMI<br>GD3 | Transmembrane<br>and<br>immunoglobulin<br>domain<br>containing 3 | 4.55<br>64  | 4.23<br>61  | 5.03<br>035 | 5.20<br>362 | 5.55<br>607 | 6.02<br>88  | 1.9841<br>85167  | 0.9885<br>46667 | 1.9841<br>85167 | Up   | 0.0111<br>33289 | 0.9845<br>43317 |

|            |             |                                                                   |             |             |             |             |             |             |                  |                  |                 |      |                 |                 |
|------------|-------------|-------------------------------------------------------------------|-------------|-------------|-------------|-------------|-------------|-------------|------------------|------------------|-----------------|------|-----------------|-----------------|
| 960        | CD44        | CD44 molecule<br>(Indian blood<br>group)                          | 7.17<br>682 | 6.61<br>615 | 7.24<br>365 | 5.97<br>766 | 6.32<br>624 | 6.63<br>804 | -1.6225<br>09209 | -0.6982<br>26667 | 1.6225<br>09209 | Down | 0.0289<br>6452  | 0.9845<br>43317 |
| 5485<br>96 | CKM<br>T1A  | Creatine kinase,<br>mitochondrial 1A                              | 7.76<br>828 | 8.70<br>526 | 8.57<br>227 | 9.12<br>401 | 8.82<br>889 | 9.40<br>338 | 1.7054<br>54974  | 0.7701<br>56667  | 1.7054<br>54974 | Up   | 0.0351<br>50218 | 0.9845<br>43317 |
| 9620       | CELS<br>R1  | Cadherin, EGF<br>LAG seven-pass<br>G-type receptor 1              | 4.79<br>076 | 5.05<br>848 | 5.19<br>802 | 4.04<br>164 | 4.26<br>452 | 4.78<br>495 | -1.5713<br>99493 | -0.6520<br>5     | 1.5713<br>99493 | Down | 0.0230<br>06317 | 0.9845<br>43317 |
| 247        | ALO<br>X15B | Arachidonate<br>15-lipoxygenase,<br>type B                        | 4.49<br>345 | 4.06<br>805 | 4.11<br>029 | 4.63<br>548 | 5.35<br>302 | 4.73<br>717 | 1.6072<br>86002  | 0.6846<br>26667  | 1.6072<br>86002 | Up   | 0.0212<br>4964  | 0.9845<br>43317 |
| 2570<br>19 | FRM<br>D3   | FERM domain<br>containing 3                                       | 4.57<br>856 | 4.17<br>422 | 4.00<br>787 | 4.60<br>529 | 4.88<br>08  | 5.08<br>51  | 1.5194<br>12224  | 0.6035<br>13333  | 1.5194<br>12224 | Up   | 0.0201<br>08455 | 0.9845<br>43317 |
| 5283       | PIGH        | Phosphatidylinosi<br>tol glycan anchor<br>biosynthesis class<br>H | 5.62<br>533 | 6.41<br>631 | 6.25<br>42  | 6.87<br>696 | 6.58<br>989 | 6.98<br>102 | 1.6441<br>51604  | 0.7173<br>43333  | 1.6441<br>51604 | Up   | 0.0239<br>33616 | 0.9845<br>43317 |

|      |      |                                                                          |      |      |      |      |      |      |        |        |        |    |        |        |
|------|------|--------------------------------------------------------------------------|------|------|------|------|------|------|--------|--------|--------|----|--------|--------|
| 9410 | ORM  | ORMDL                                                                    | 5.36 | 5.74 | 5.85 | 6.19 | 6.21 | 6.51 | 1.5743 | 0.6547 | 1.5743 | Up | 0.0115 | 0.9845 |
| 1    | DL1  | sphingolipid biosynthesis regulator 1                                    | 048  | 794  | 361  | 995  | 425  | 201  | 17654  | 26667  | 17654  |    | 55215  | 43317  |
| 1116 | NUD  | Nudix hydrolase 4                                                        | 7.94 | 8.72 | 7.05 | 8.70 | 9.27 | 9.22 | 2.2334 | 1.1592 | 2.2334 | Up | 0.0308 | 0.9845 |
| 3    | T4   |                                                                          | 991  | 461  | 272  | 06   | 632  | 821  | 85156  | 96667  | 85156  |    | 78175  | 43317  |
| 8379 | MAD  | MAD1 mitotic arrest deficient-like 1 (yeast)                             | 6.57 | 6.82 | 6.42 | 7.55 | 7.54 | 7.36 | 1.8441 | 0.8829 | 1.8441 | Up | 0.0012 | 0.9845 |
|      | IL1  |                                                                          | 326  | 234  | 272  | 68   | 316  | 723  | 50843  | 56667  | 50843  |    | 91689  | 43317  |
| 1499 | CTN  | Catenin $\beta$ 1                                                        | 6.59 | 6.85 | 6.72 | 6.90 | 7.76 | 7.26 | 1.5043 | 0.5891 | 1.5043 | Up | 0.0464 | 0.9845 |
|      | NB1  |                                                                          | 189  | 124  | 29   | 552  | 503  | 294  | 63631  | 53333  | 63631  |    | 53649  | 43317  |
| 1147 | SLC2 | Solute carrier family (mitochondrial carrier; phosphate carrier), member | 8.55 | 9.08 | 8.81 | 9.57 | 9.83 | 8.98 | 1.5653 | 0.6464 | 1.5653 | Up | 0.0438 | 0.9845 |
| 89   | 5A25 | 25                                                                       | 52   | 664  | 691  | 811  | 023  | 985  | 44284  | 8      | 44284  |    | 24438  | 43317  |

|            |            |                                      |             |             |             |             |             |             |                  |                  |                 |      |                 |                 |
|------------|------------|--------------------------------------|-------------|-------------|-------------|-------------|-------------|-------------|------------------|------------------|-----------------|------|-----------------|-----------------|
|            |            | 25                                   |             |             |             |             |             |             |                  |                  |                 |      |                 |                 |
| 2330       | FMO<br>5   | Flavin containing<br>monooxygenase 5 | 7.54<br>629 | 8.78<br>671 | 8.22<br>774 | 9.51<br>296 | 8.88<br>046 | 8.92<br>967 | 1.8931<br>42925  | 0.9207<br>83333  | 1.8931<br>42925 | Up   | 0.0342<br>76122 | 0.9845<br>43317 |
| 2342<br>9  | RYP<br>P   | RING1 and YY1<br>binding protein     | 7.93<br>219 | 7.25<br>988 | 7.86<br>155 | 8.04<br>929 | 8.76<br>501 | 8.32<br>033 | 1.6173<br>92694  | 0.6936<br>7      | 1.6173<br>92694 | Up   | 0.0368<br>31865 | 0.9845<br>43317 |
| 1462       | VCA<br>N   | Versican                             | 5.97<br>797 | 5.78<br>578 | 4.94<br>017 | 4.36<br>238 | 4.19<br>191 | 5.06<br>88  | -2.0377<br>02354 | -1.0269<br>43333 | 2.0377<br>02354 | Down | 0.0219<br>87556 | 0.9845<br>43317 |
| 3893<br>76 | SFTA<br>2  | Surfactant<br>associated 2           | 8.09<br>184 | 9.22<br>039 | 8.57<br>636 | 9.47<br>882 | 9.63<br>941 | 9.20<br>316 | 1.7543<br>46028  | 0.8109<br>33333  | 1.7543<br>46028 | Up   | 0.0327<br>81368 | 0.9845<br>43317 |
| 1148<br>80 | OSB<br>PL6 | Oxysterol binding<br>protein like 6  | 6.58<br>653 | 7.49<br>918 | 6.38<br>885 | 7.81<br>957 | 7.88<br>434 | 7.56<br>299 | 1.9063<br>06371  | 0.9307<br>8      | 1.9063<br>06371 | Up   | 0.0204<br>25989 | 0.9845<br>43317 |
| 1806       | DPY<br>D   | Dihydropyrimidin<br>e dehydrogenase  | 6.38<br>965 | 7.48<br>049 | 7.80<br>655 | 7.74<br>87  | 8.54<br>434 | 8.67<br>662 | 2.1400<br>68042  | 1.0976<br>56667  | 2.1400<br>68042 | Up   | 0.0380<br>87454 | 0.9845<br>43317 |
| 7504       | XK         | X-linked Kx<br>blood group           | 4.31<br>887 | 5.14<br>045 | 5.36<br>258 | 5.78<br>509 | 5.54<br>077 | 5.70<br>231 | 1.6648<br>85929  | 0.7354<br>23333  | 1.6648<br>85929 | Up   | 0.0358<br>57242 | 0.9845<br>43317 |
| 3556       | IL1R<br>AP | Interleukin 1<br>receptor accessory  | 3.40<br>82  | 3.75<br>28  | 3.78<br>695 | 4.11<br>666 | 5.05<br>137 | 4.11<br>279 | 1.7143<br>04435  | 0.7776<br>23333  | 1.7143<br>04435 | Up   | 0.0275<br>42605 | 0.9845<br>43317 |

|                   |                     |                                                                                      |             |             |             |             |             |             |                 |                 |                 |    |                 |                 |
|-------------------|---------------------|--------------------------------------------------------------------------------------|-------------|-------------|-------------|-------------|-------------|-------------|-----------------|-----------------|-----------------|----|-----------------|-----------------|
|                   |                     | protein                                                                              |             |             |             |             |             |             |                 |                 |                 |    |                 |                 |
| 8362              | HIST<br>1H4K        | Histone cluster 1,<br>h4k                                                            | 8.25<br>122 | 8.45<br>981 | 8.90<br>68  | 8.92<br>262 | 9.28<br>796 | 9.16<br>953 | 1.5025<br>64234 | 0.5874<br>26667 | 1.5025<br>64234 | Up | 0.0300<br>78133 | 0.9845<br>43317 |
| 6563              | SLC1<br>4A1         | Solute carrier<br>family 14 (urea<br>transporter),<br>member 1 (Kidd<br>blood group) | 6.52<br>426 | 8.22<br>516 | 6.94<br>562 | 8.28<br>931 | 8.41<br>077 | 9.06<br>667 | 2.5619<br>39961 | 1.3572<br>36667 | 2.5619<br>39961 | Up | 0.0230<br>64922 | 0.9845<br>43317 |
| 5329              | PLA<br>UR           | Plasminogen<br>activator,<br>urokinase receptor                                      | 5.02<br>651 | 5.03<br>142 | 5.11<br>576 | 5.36<br>989 | 6.11<br>924 | 5.66<br>022 | 1.5784<br>98985 | 0.6585<br>53333 | 1.5784<br>98985 | Up | 0.0172<br>256   | 0.9845<br>43317 |
| 1005<br>3399<br>0 | APO<br>C4-A<br>POC2 | APOC4-APOC2<br>readthrough<br>(NMD candidate)                                        | 6.06<br>565 | 6.58<br>253 | 5.60<br>903 | 7.88<br>934 | 6.60<br>426 | 7.64<br>836 | 2.4536<br>28223 | 1.2949<br>16667 | 2.4536<br>28223 | Up | 0.0156<br>3271  | 0.9845<br>43317 |
| 1188<br>12        | MOR<br>N4           | MORN repeat<br>containing 4                                                          | 4.04<br>789 | 5.41<br>598 | 3.60<br>322 | 5.86<br>437 | 5.20<br>348 | 5.77<br>418 | 2.3921<br>59081 | 1.2583<br>13333 | 2.3921<br>59081 | Up | 0.0333<br>63427 | 0.9845<br>43317 |
| 1137              | ZBE                 | ZBED6                                                                                | 4.68        | 4.88        | 5.61        | 5.76        | 5.66        | 5.89        | 1.6365          | 0.7106          | 1.6365          | Up | 0.0292          | 0.9845          |

|           |            |                                                                  |             |             |             |             |             |             |                  |                 |                 |      |                 |                 |
|-----------|------------|------------------------------------------------------------------|-------------|-------------|-------------|-------------|-------------|-------------|------------------|-----------------|-----------------|------|-----------------|-----------------|
| 63        | D6C<br>L   | C-terminal like                                                  | 741         | 079         | 605         | 314         | 057         | 263         | 94225            | 96667           | 94225           |      | 52613           | 43317           |
| 6262      | RYR<br>2   | Ryanodine<br>receptor<br>(cardiac)                               | 3.77<br>091 | 3.92<br>656 | 3.43<br>009 | 3.96<br>229 | 4.40<br>075 | 5.04<br>19  | 1.6924<br>65783  | 0.7591<br>26667 | 1.6924<br>65783 | Up   | 0.0340<br>15582 | 0.9845<br>43317 |
| 6751      | SSTR<br>1  | Somatostatin<br>receptor 1                                       | 4.46<br>69  | 4.90<br>886 | 3.48<br>087 | 5.37<br>304 | 5.17<br>383 | 5.09<br>243 | 1.9020<br>51971  | 0.9275<br>56667 | 1.9020<br>51971 | Up   | 0.0356<br>70655 | 0.9845<br>43317 |
| 1085<br>5 | HPSE       | Heparanase                                                       | 4.32<br>842 | 4.46<br>54  | 4.44<br>368 | 4.67<br>105 | 5.03<br>964 | 5.31<br>818 | 1.5126<br>97309  | 0.5971<br>23333 | 1.5126<br>97309 | Up   | 0.0147<br>48999 | 0.9845<br>43317 |
| 8417<br>1 | LOX<br>L4  | Lysyl oxidase like<br>4                                          | 5.59<br>969 | 4.96<br>63  | 5.67<br>802 | 4.19<br>192 | 5.04<br>532 | 4.50<br>966 | -1.7806<br>08071 | -0.8323<br>7    | 1.7806<br>08071 | Down | 0.0237<br>99305 | 0.9845<br>43317 |
| 2214      | FCG<br>R3A | Fc fragment of<br>igg, low affinity<br>iiia, receptor<br>(CD16a) | 3.58<br>645 | 4.08<br>094 | 3.98<br>549 | 4.03<br>122 | 4.80<br>199 | 4.63<br>488 | 1.5210<br>52553  | 0.6050<br>7     | 1.5210<br>52553 | Up   | 0.0393<br>30653 | 0.9845<br>43317 |
| 5534<br>2 | STR<br>BP  | Spermatid<br>perinuclear RNA                                     | 6.99<br>395 | 8.14<br>935 | 8.02<br>991 | 8.79<br>68  | 8.47<br>681 | 8.32<br>468 | 1.7512<br>19592  | 0.8083<br>6     | 1.7512<br>19592 | Up   | 0.0472<br>81458 | 0.9845<br>43317 |



|      |            |                                                                                          |             |             |             |             |             |             |                 |                 |                 |    |                 |                 |
|------|------------|------------------------------------------------------------------------------------------|-------------|-------------|-------------|-------------|-------------|-------------|-----------------|-----------------|-----------------|----|-----------------|-----------------|
|      |            | binding protein                                                                          |             |             |             |             |             |             |                 |                 |                 |    |                 |                 |
| 5447 | PLE        | Pleckstrin                                                                               | 3.00        | 3.88        | 4.03        | 4.60        | 4.23        | 4.39        | 1.7088          | 0.7730          | 1.7088          | Up | 0.0293          | 0.9845          |
| 7    | KHA<br>5   | homology domain<br>containing A5                                                         | 045         | 284         | 248         | 058         | 541         | 881         | 31326           | 1               | 31326           |    | 52195           | 43317           |
| 9060 | PAPS<br>S2 | 3'-phosphoadenosine<br>5'-phosphosulfate<br>synthase 2                                   | 5.18<br>235 | 5.78<br>489 | 5.85<br>456 | 6.71<br>077 | 5.95<br>796 | 6.19<br>245 | 1.6019<br>10264 | 0.6797<br>93333 | 1.6019<br>10264 | Up | 0.0427<br>97552 | 0.9845<br>43317 |
| 2651 | GCN<br>T2  | Glucosaminyl<br>(N-acetyl)<br>transferase 2,<br>I-branching<br>enzyme (I blood<br>group) | 3.32<br>765 | 3.80<br>554 | 3.94<br>279 | 4.37<br>161 | 4.19<br>198 | 4.42<br>326 | 1.5550<br>45363 | 0.6369<br>56667 | 1.5550<br>45363 | Up | 0.0099<br>6272  | 0.9845<br>43317 |
| 9619 | ABC<br>G1  | ATP binding<br>cassette subfamily<br>G member 1                                          | 5.44<br>445 | 6.88<br>116 | 4.89<br>167 | 6.62<br>536 | 7.22<br>393 | 7.19<br>237 | 2.4196<br>41539 | 1.2747<br>93333 | 2.4196<br>41539 | Up | 0.0414<br>93955 | 0.9845<br>43317 |

|            |             |                                                       |             |             |             |             |             |             |                 |                 |                 |    |                 |                 |
|------------|-------------|-------------------------------------------------------|-------------|-------------|-------------|-------------|-------------|-------------|-----------------|-----------------|-----------------|----|-----------------|-----------------|
| 9446       | GST<br>O1   | Glutathione<br>S-transferase<br>omega 1               | 9.73<br>155 | 10.1<br>742 | 9.94<br>167 | 10.6<br>811 | 10.5<br>349 | 10.4<br>218 | 1.5123<br>8628  | 0.5968<br>26667 | 1.5123<br>8628  | Up | 0.0096<br>48823 | 0.9845<br>43317 |
| 2414<br>6  | CLD<br>N15  | Claudin 15                                            | 5.57<br>032 | 5.36<br>361 | 5.58<br>241 | 6.15<br>631 | 6.52<br>115 | 5.85<br>627 | 1.5937<br>9197  | 0.6724<br>63333 | 1.5937<br>9197  | Up | 0.0139<br>35857 | 0.9845<br>43317 |
| 1025<br>7  | ABC<br>C4   | ATP binding<br>cassette subfamily<br>C member 4       | 3.67<br>291 | 4.87<br>875 | 5.18<br>755 | 5.48<br>16  | 5.35<br>537 | 5.97<br>346 | 2.0331<br>82897 | 1.0237<br>4     | 2.0331<br>82897 | Up | 0.0417<br>94918 | 0.9845<br>43317 |
| 9465       | AKA<br>P7   | A-kinase<br>anchoring protein<br>7                    | 3.39<br>067 | 4.12<br>529 | 4.07<br>996 | 5.21<br>727 | 4.53<br>909 | 5.49<br>863 | 2.3289<br>66681 | 1.2196<br>9     | 2.3289<br>66681 | Up | 0.0060<br>1527  | 0.9845<br>43317 |
| 4406<br>72 | NUD<br>T4P1 | Nudix hydrolase 4<br>pseudogene 1                     | 7.94<br>991 | 8.72<br>461 | 7.05<br>272 | 8.70<br>06  | 9.27<br>632 | 9.22<br>821 | 2.2334<br>85156 | 1.1592<br>96667 | 2.2334<br>85156 | Up | 0.0308<br>78175 | 0.9845<br>43317 |
| 1577<br>69 | FAM<br>91A1 | Family with<br>sequence<br>similarity 91<br>member A1 | 6.40<br>799 | 6.69<br>703 | 6.56<br>82  | 6.93<br>653 | 7.09<br>127 | 7.44<br>719 | 1.5163<br>36556 | 0.6005<br>9     | 1.5163<br>36556 | Up | 0.0159<br>56414 | 0.9845<br>43317 |

|            |                  |                                                    |             |             |             |             |             |             |                  |                  |                 |      |                 |                 |
|------------|------------------|----------------------------------------------------|-------------|-------------|-------------|-------------|-------------|-------------|------------------|------------------|-----------------|------|-----------------|-----------------|
| 1171<br>55 | CAT<br>SPER<br>2 | Cation channel,<br>sperm associated<br>2           | 5.77<br>596 | 5.97<br>083 | 6.05<br>176 | 6.37<br>784 | 6.41<br>246 | 7.02<br>371 | 1.5930<br>81417  | 0.6718<br>2      | 1.5930<br>81417 | Up   | 0.0189<br>03689 | 0.9845<br>43317 |
| 1643       | DDB<br>2         | Damage-specific<br>DNA binding<br>protein 2        | 7.56<br>483 | 7.38<br>022 | 6.57<br>705 | 6.44<br>201 | 6.35<br>419 | 6.64<br>193 | -1.6184<br>99216 | -0.6946<br>56667 | 1.6184<br>99216 | Down | 0.0430<br>87104 | 0.9845<br>43317 |
| 6398<br>2  | ANO<br>3         | Anoctamin 3                                        | 3.57<br>603 | 4.44<br>541 | 4.19<br>024 | 4.29<br>427 | 4.97<br>733 | 5.39<br>171 | 1.7619<br>95207  | 0.8172<br>1      | 1.7619<br>95207 | Up   | 0.0473<br>89316 | 0.9845<br>43317 |
| 6449<br>9  | TPSB<br>2        | Tryptase $\beta$ 2<br>(gene/pseudogene<br>)        | 8.38<br>641 | 8.64<br>308 | 8.30<br>774 | 8.76<br>869 | 9.04<br>42  | 9.53<br>842 | 1.5925<br>73548  | 0.6713<br>6      | 1.5925<br>73548 | Up   | 0.0239<br>29839 | 0.9845<br>43317 |
| 7432       | VIP              | Vasoactive<br>intestinal peptide                   | 4.74<br>873 | 5.10<br>943 | 5.11<br>408 | 6.43<br>487 | 7.14<br>496 | 5.42<br>684 | 2.5399<br>67435  | 1.3448<br>1      | 2.5399<br>67435 | Up   | 0.0162<br>41566 | 0.9845<br>43317 |
| 5575<br>5  | CDK<br>5RAP<br>2 | CDK5 regulatory<br>subunit associated<br>protein 2 | 8.12<br>642 | 7.66<br>184 | 7.31<br>053 | 7.33<br>027 | 6.09<br>621 | 6.93<br>229 | -1.8834<br>00738 | -0.9133<br>4     | 1.8834<br>00738 | Down | 0.0420<br>04471 | 0.9845<br>43317 |
| 8496       | PNM              | Paraneoplastic Ma                                  | 5.84        | 5.00        | 5.13        | 4.57        | 4.85        | 4.70        | -1.5338          | -0.6171          | 1.5338          | Down | 0.0397          | 0.9845          |

|      |      |                                                 |      |      |      |      |      |      |         |         |        |      |        |        |
|------|------|-------------------------------------------------|------|------|------|------|------|------|---------|---------|--------|------|--------|--------|
| 8    | A6A  | antigen family member 6A                        | 986  | 544  | 469  | 44   | 442  | 978  | 20865   | 3       | 20865  |      | 5022   | 43317  |
| 2606 | RAI1 | Retinoic acid induced 14                        | 5.96 | 5.42 | 5.70 | 4.72 | 5.23 | 5.34 | -1.5128 | -0.5973 | 1.5128 | Down | 0.0347 | 0.9845 |
| 4    | 4    |                                                 | 464  | 866  | 721  | 698  | 424  | 736  | 93046   | 1       | 93046  |      | 15536  | 43317  |
| 2294 | CCT5 | Chaperonin containing TCP1, subunit 5 (epsilon) | 5.69 | 5.54 | 5.27 | 5.87 | 6.01 | 6.58 | 1.5724  | 0.6530  | 1.5724 | Up   | 0.0269 | 0.9845 |
| 8    |      |                                                 | 607  | 967  | 563  | 926  | 638  | 476  | 45484   | 1       | 45484  |      | 5592   | 43317  |
| 1059 | SCG  | Secretagoin, EF-hand calcium binding protein    | 4.06 | 4.16 | 4.48 | 5.36 | 4.36 | 5.97 | 1.9950  | 0.9964  | 1.9950 | Up   | 0.0415 | 0.9845 |
| 0    | N    |                                                 | 846  | 228  | 417  | 397  | 358  | 665  | 57047   | 3       | 57047  |      | 44666  | 43317  |
| 5827 | PXM  | Peroxisomal membrane protein 2                  | 8.18 | 9.16 | 9.08 | 9.67 | 9.45 | 9.75 | 1.7566  | 0.8128  | 1.7566 | Up   | 0.0259 | 0.9845 |
|      | P2   |                                                 | 437  | 66   | 838  | 184  | 559  | 049  | 86399   | 56667   | 86399  |      | 53704  | 43317  |
| 9161 | CHU  | Churchill domain containing 1                   | 4.53 | 4.76 | 4.89 | 5.34 | 4.91 | 5.79 | 1.5406  | 0.6235  | 1.5406 | Up   | 0.0381 | 0.9845 |
| 2    | RC1  |                                                 | 896  | 417  | 075  | 646  | 886  | 912  | 29548   | 2       | 29548  |      | 81273  | 43317  |
| 989  | SEPT | Septin 7                                        | 8.28 | 7.72 | 7.86 | 7.46 | 7.38 | 6.95 | -1.6140 | -0.6907 | 1.6140 | Down | 0.0184 | 0.9845 |

|      |      |                                                         |      |      |      |      |      |      |         |         |        |      |        |        |
|------|------|---------------------------------------------------------|------|------|------|------|------|------|---------|---------|--------|------|--------|--------|
|      | 7    |                                                         | 654  | 346  | 381  | 412  | 459  | 3    | 66478   |         | 66478  |      | 76645  | 43317  |
| 7941 | ZBE  | Zinc finger,                                            | 4.32 | 4.96 | 4.70 | 6.34 | 5.71 | 5.65 | 2.3628  | 1.2405  | 2.3628 | Up   | 0.0021 | 0.9845 |
| 3    | D2   | BED-type<br>containing 2                                | 272  | 886  | 157  | 898  | 006  | 564  | 20444   | 1       | 20444  |      | 93826  | 43317  |
| 3384 | ICA  | Intercellular                                           | 6.80 | 5.62 | 5.75 | 5.20 | 5.11 | 5.39 | -1.7702 | -0.8239 | 1.7702 | Down | 0.0395 | 0.9845 |
|      | M2   | adhesion<br>molecule 2                                  | 168  | 558  | 592  | 145  | 633  | 364  | 09365   | 2       | 09365  |      | 83186  | 43317  |
| 4405 | PLIN | Perilipin 5                                             | 6.82 | 6.28 | 6.40 | 6.19 | 5.70 | 5.57 | -1.6023 | -0.6801 | 1.6023 | Down | 0.0236 | 0.9845 |
| 03   | 5    |                                                         | 56   | 75   | 47   | 401  | 564  | 77   | 06342   | 5       | 06342  |      | 2611   | 43317  |
| 3108 | HLA- | Major                                                   | 9.15 | 8.63 | 8.82 | 8.09 | 8.20 | 8.37 | -1.5658 | -0.6469 | 1.5658 | Down | 0.0107 | 0.9845 |
|      | DMA  | histocompatibility<br>complex, class II,<br>DM $\alpha$ | 296  | 17   | 767  | 745  | 279  | 116  | 83267   | 76667   | 83267  |      | 54922  | 43317  |
| 191  | AHC  | Adenosylhomocy                                          | 6.19 | 6.73 | 6.85 | 7.25 | 7.14 | 7.42 | 1.6035  | 0.6812  | 1.6035 | Up   | 0.0169 | 0.9845 |
|      | Y    | steinase                                                | 18   | 175  | 943  | 909  | 579  | 192  | 5444    | 73333   | 5444   |      | 81602  | 43317  |
| 5420 | TRE  | Triggering                                              | 5.84 | 6.73 | 5.72 | 7.10 | 7.13 | 7.30 | 2.1146  | 1.0803  | 2.1146 | Up   | 0.0074 | 0.9845 |
| 9    | M2   | receptor                                                | 143  | 189  | 715  | 693  | 406  | 064  | 02754   | 86667   | 02754  |      | 74361  | 43317  |

|           |            |                                                           |             |             |             |             |             |             |                 |                 |                 |    |                 |                 |
|-----------|------------|-----------------------------------------------------------|-------------|-------------|-------------|-------------|-------------|-------------|-----------------|-----------------|-----------------|----|-----------------|-----------------|
|           |            | expressed on<br>myeloid cells 2                           |             |             |             |             |             |             |                 |                 |                 |    |                 |                 |
| 4756      | NEO<br>1   | Neogenin 1                                                | 5.68<br>211 | 6.65<br>759 | 6.30<br>412 | 7.01<br>046 | 6.71<br>95  | 6.89<br>183 | 1.5793<br>41692 | 0.6593<br>23333 | 1.5793<br>41692 | Up | 0.0441<br>41395 | 0.9845<br>43317 |
| 5522<br>8 | PNM<br>AL1 | Paraneoplastic Ma<br>antigen<br>family-like 1             | 5.45<br>139 | 5.27<br>86  | 5.02<br>716 | 5.76<br>636 | 5.69<br>683 | 6.42<br>602 | 1.6365<br>82881 | 0.7106<br>86667 | 1.6365<br>82881 | Up | 0.0220<br>65553 | 0.9845<br>43317 |
| 6512<br>4 | SOW<br>AHC | Sosondowah<br>ankyrin repeat<br>domain family<br>member C | 6.61<br>208 | 6.87<br>154 | 7.11<br>912 | 7.92<br>193 | 7.94<br>469 | 7.28<br>626 | 1.8025<br>59231 | 0.8500<br>46667 | 1.8025<br>59231 | Up | 0.0106<br>76416 | 0.9845<br>43317 |
| 1078<br>8 | IQG<br>AP2 | IQ motif<br>containing gtpase<br>activating protein<br>2  | 3.54<br>593 | 4.43<br>629 | 5.16<br>422 | 5.53<br>338 | 5.44<br>819 | 5.40<br>998 | 2.1165<br>33514 | 1.0817<br>03333 | 2.1165<br>33514 | Up | 0.0272<br>52649 | 0.9845<br>43317 |
| 4753      | NEL<br>L2  | Neural EGFL like<br>2                                     | 5.08<br>122 | 5.11<br>592 | 5.20<br>055 | 6.54<br>884 | 6.82<br>198 | 6.85<br>822 | 3.0534<br>70696 | 1.6104<br>5     | 3.0534<br>70696 | Up | 1.9995<br>4E-05 | 0.7824<br>19724 |

|      |      |                                                  |      |      |      |      |      |      |        |        |        |    |        |        |
|------|------|--------------------------------------------------|------|------|------|------|------|------|--------|--------|--------|----|--------|--------|
| 1356 | DPC  | Diffuse                                          | 6.95 | 8.88 | 6.36 | 9.20 | 9.71 | 8.81 | 3.5902 | 1.8441 | 3.5902 | Up | 0.0253 | 0.9845 |
| 56   | R1   | panbronchiolitis<br>critical region 1            | 642  | 316  | 644  | 637  | 227  | 969  | 97349  | 03333  | 97349  |    | 56619  | 43317  |
| 4289 | MKL  | Muskelin 1                                       | 6.16 | 5.93 | 6.59 | 6.55 | 7.26 | 6.74 | 1.5425 | 0.6253 | 1.5425 | Up | 0.0481 | 0.9845 |
|      | N1   |                                                  | 427  | 577  | 064  | 546  | 77   | 359  | 92142  | 56667  | 92142  |    | 95535  | 43317  |
| 1452 | RDH  | Retinol                                          | 8.07 | 9.35 | 9.61 | 10.3 | 10.1 | 10.2 | 2.4121 | 1.2703 | 2.4121 | Up | 0.0159 | 0.9845 |
| 26   | 12   | dehydrogenase 12<br>(all-trans/9-cis/11<br>-cis) | 578  | 589  | 625  | 924  | 787  | 877  | 84068  | 4      | 84068  |    | 87669  | 43317  |
| 2340 | FRA  | Frequently                                       | 5.58 | 6.72 | 5.89 | 6.81 | 6.76 | 6.80 | 1.6558 | 0.7275 | 1.6558 | Up | 0.0463 | 0.9845 |
| 1    | T2   | rearranged in<br>advanced T-cell<br>lymphomas 2  | 156  | 878  | 285  | 94   | 487  | 152  | 05635  | 33333  | 05635  |    | 26904  | 43317  |
| 175  | AGA  | Aspartylglucosam<br>inidase                      | 6.26 | 7.52 | 7.67 | 7.83 | 8.25 | 8.16 | 1.9019 | 0.9275 | 1.9019 | Up | 0.0488 | 0.9845 |
|      |      |                                                  | 959  | 654  | 523  | 404  | 181  | 805  | 94841  | 13333  | 94841  |    | 67075  | 43317  |
| 6707 | SPRR | Small proline-rich                               | 5.59 | 7.14 | 7.49 | 10.1 | 7.66 | 8.33 | 3.9424 | 1.9790 | 3.9424 | Up | 0.0367 | 0.9845 |
|      | 3    | protein 3                                        | 916  | 978  | 896  | 885  | 426  | 242  | 52391  | 93333  | 52391  |    | 63708  | 43317  |

|            |            |                                                                                                               |             |             |             |             |             |             |                  |                  |                 |      |                 |                 |
|------------|------------|---------------------------------------------------------------------------------------------------------------|-------------|-------------|-------------|-------------|-------------|-------------|------------------|------------------|-----------------|------|-----------------|-----------------|
| 5648       | MAS<br>P1  | Mannan-binding<br>lectin serine<br>peptidase 1<br>(C4/C2 activating<br>component of<br>Ra-reactive<br>factor) | 7.39<br>323 | 6.63<br>161 | 6.45<br>693 | 6.43<br>487 | 6.02<br>928 | 5.41<br>323 | -1.8252<br>95445 | -0.8681<br>3     | 1.8252<br>95445 | Down | 0.0432<br>35696 | 0.9845<br>43317 |
| 1124<br>0  | PADI<br>2  | Peptidyl arginine<br>deiminase, type II                                                                       | 5.23<br>616 | 5.19<br>566 | 4.88<br>63  | 6.32<br>371 | 5.33<br>365 | 5.81<br>37  | 1.6444<br>97331  | 0.7176<br>46667  | 1.6444<br>97331 | Up   | 0.0332<br>46961 | 0.9845<br>43317 |
| 2192<br>85 | SAM<br>D9L | Sterile $\alpha$ motif<br>domain<br>containing 9-like                                                         | 6.01<br>471 | 5.36<br>231 | 5.38<br>228 | 4.68<br>774 | 5.15<br>74  | 4.90<br>108 | -1.5922<br>05627 | -0.6710<br>26667 | 1.5922<br>05627 | Down | 0.0236<br>70136 | 0.9845<br>43317 |
| 6478<br>1  | CER<br>K   | Ceramide kinase                                                                                               | 6.79<br>889 | 6.99<br>272 | 7.46<br>089 | 7.77<br>953 | 7.64<br>228 | 8.00<br>904 | 1.6541<br>805    | 0.7261<br>16667  | 1.6541<br>805   | Up   | 0.0134<br>81504 | 0.9845<br>43317 |
| 5585<br>9  | BEX<br>1   | Brain expressed<br>X-linked 1                                                                                 | 6.24<br>49  | 6.28<br>735 | 6.51<br>006 | 6.81<br>717 | 7.17<br>424 | 8.31<br>537 | 2.1260<br>22207  | 1.0881<br>56667  | 2.1260<br>22207 | Up   | 0.0263<br>30269 | 0.9845<br>43317 |
| 7903       | ST8S       | ST8                                                                                                           | 5.41        | 6.18        | 6.04        | 4.60        | 4.78        | 4.71        | -2.2652          | -1.1796          | 2.2652          | Down | 0.0013          | 0.9845          |



|       |        |                                                                             |         |         |         |         |         |         |             |             |             |    |             |             |
|-------|--------|-----------------------------------------------------------------------------|---------|---------|---------|---------|---------|---------|-------------|-------------|-------------|----|-------------|-------------|
|       | IA4    | $\alpha$ -N-acetyl-neuraminidase 4                                          | 35      | 019     | 885     | 625     | 022     | 698     | 91432       | 96667       | 91432       |    | 52058       | 43317       |
| 51678 | MPP6   | Membrane protein, palmitoylated 6                                           | 6.45751 | 7.53619 | 7.47658 | 8.17297 | 8.03417 | 7.97959 | 1.873171942 | 0.905483333 | 1.873171942 | Up | 0.022581586 | 0.984543317 |
| 338   | APOB   | Apolipoprotein B                                                            | 4.86106 | 5.69068 | 4.77937 | 8.38708 | 5.5525  | 6.64636 | 3.367341407 | 1.75161     | 3.367341407 | Up | 0.042084461 | 0.984543317 |
| 2215  | FCGR3B | Fc fragment of $\text{IgG}$ , low affinity $\text{IIIb}$ , receptor (CD16b) | 3.58645 | 4.08094 | 3.98549 | 4.03122 | 4.80199 | 4.63488 | 1.521052553 | 0.60507     | 1.521052553 | Up | 0.039330653 | 0.984543317 |
| 57194 | ATP10A | ATPase, class V, type 10A                                                   | 5.69622 | 5.30231 | 5.03026 | 6.06101 | 5.66088 | 6.11239 | 1.517640411 | 0.60183     | 1.517640411 | Up | 0.032888525 | 0.984543317 |

Table SII. DEGs in comparison II.

| Entrez<br>accessi<br>on no. | Gene<br>symbol | Gene name                                                 | Gallb<br>ladde<br>r wall<br>of<br>gallst<br>one<br>(A10<br>933) | Gallb<br>ladde<br>r wall<br>of<br>gallst<br>one<br>(A10<br>934) | Gallb<br>ladde<br>r wall<br>of<br>gallst<br>one<br>(A10<br>939) | Gallb<br>ladde<br>r wall<br>of<br>gallbl<br>adder<br>adeno<br>ma<br>(A10<br>951) | Gallb<br>ladde<br>r wall<br>of<br>gallbl<br>adder<br>adeno<br>ma<br>(A10<br>956) | Gallb<br>ladde<br>r wall<br>of<br>gallbl<br>adder<br>adeno<br>ma<br>(A10<br>957) | Fold-chang<br>e  | Log fold<br>-change | Absolute<br>fold<br>-change | Regulat<br>ion | P-value         | False<br>discover<br>y rate<br>(FDR) |
|-----------------------------|----------------|-----------------------------------------------------------|-----------------------------------------------------------------|-----------------------------------------------------------------|-----------------------------------------------------------------|----------------------------------------------------------------------------------|----------------------------------------------------------------------------------|----------------------------------------------------------------------------------|------------------|---------------------|-----------------------------|----------------|-----------------|--------------------------------------|
| 51285                       | RASL1<br>2     | RAS-like,<br>family 12                                    | 7.939<br>97                                                     | 6.478<br>61                                                     | 6.474<br>17                                                     | 4.625<br>98                                                                      | 6.522<br>17                                                                      | 5.339<br>53                                                                      | -2.7670652<br>54 | -1.46835<br>6667    | 2.767065<br>254             | Down           | 0.042621<br>364 | 0.955609<br>729                      |
| 60481                       | ELOV<br>L5     | ELOVL fatty<br>acid<br>elongase 5                         | 6.531<br>61                                                     | 5.535<br>52                                                     | 6.220<br>08                                                     | 5.091<br>27                                                                      | 4.667<br>7                                                                       | 5.069<br>67                                                                      | -2.2235373<br>93 | -1.15285<br>6667    | 2.223537<br>393             | Down           | 0.005258<br>036 | 0.955609<br>729                      |
| 286530                      | P2RY8          | Purinergic<br>receptor<br>P2Y,<br>G-protein<br>coupled, 8 | 6.232<br>1                                                      | 4.645<br>75                                                     | 6.555<br>98                                                     | 4.158<br>77                                                                      | 4.347<br>08                                                                      | 4.489<br>47                                                                      | -2.7885271<br>8  | -1.47950<br>3333    | 2.788527<br>18              | Down           | 0.018589<br>415 | 0.955609<br>729                      |
| 287                         | ANK2           | Ankyrin 2,<br>neuronal                                    | 4.420<br>72                                                     | 4.248<br>61                                                     | 4.265<br>26                                                     | 5.973<br>57                                                                      | 5.896<br>55                                                                      | 4.400<br>47                                                                      | 2.1614508<br>04  | 1.112               | 2.161450<br>804             | Up             | 0.033062<br>858 | 0.955609<br>729                      |
| 51705                       | EMCN           | Endomucin                                                 | 8.426<br>5                                                      | 6.259<br>9                                                      | 6.211<br>04                                                     | 4.698<br>62                                                                      | 4.860<br>23                                                                      | 5.818<br>42                                                                      | -3.5802409<br>07 | -1.84005<br>6667    | 3.580240<br>907             | Down           | 0.025342<br>011 | 0.955609<br>729                      |
| 8379                        | MAD1<br>L1     | MAD1<br>mitotic arrest<br>deficient-like<br>1 (yeast)     | 6.573<br>26                                                     | 6.822<br>34                                                     | 6.422<br>72                                                     | 7.210<br>85                                                                      | 7.292<br>1                                                                       | 7.665<br>94                                                                      | 1.7213295<br>55  | 0.783523<br>333     | 1.721329<br>555             | Up             | 0.006388<br>43  | 0.955609<br>729                      |
| 5238                        | PGM3           | Phosphogluc                                               | 5.816                                                           | 5.972                                                           | 6.500                                                           | 6.843                                                                            | 6.654                                                                            | 6.932                                                                            | 1.6399554        | 0.713656            | 1.639955                    | Up             | 0.015903        | 0.955609                             |

|        |           |                                                                    |             |             |             |              |             |              |                  |                  |                 |      |                 |                 |
|--------|-----------|--------------------------------------------------------------------|-------------|-------------|-------------|--------------|-------------|--------------|------------------|------------------|-----------------|------|-----------------|-----------------|
| 5238   | PGM3      | Phosphogluc<br>omutase 3                                           | 5.816<br>61 | 5.972<br>46 | 6.500<br>25 | 6.843<br>14  | 6.654<br>27 | 6.932<br>88  | 1.6399554<br>98  | 0.713656<br>667  | 1.639955<br>498 | Up   | 0.015903<br>204 | 0.955609<br>729 |
| 253827 | MSRB<br>3 | Methionine<br>sulfoxide<br>reductase B3                            | 7.535<br>82 | 6.821<br>31 | 6.423<br>54 | 4.517<br>76  | 6.814<br>31 | 4.229<br>34  | -3.3397806<br>06 | -1.73975<br>3333 | 3.339780<br>606 | Down | 0.042396<br>569 | 0.955609<br>729 |
| 3821   | KLRC1     | Killer cell<br>lectin-like<br>receptor<br>subfamily C,<br>member 1 | 4.241<br>77 | 3.674<br>14 | 3.589<br>05 | 4.83         | 5.456<br>03 | 5.831<br>27  | 2.9028030<br>01  | 1.537446<br>667  | 2.902803<br>001 | Up   | 0.001491<br>72  | 0.955609<br>729 |
| 377677 | CA13      | Carbonic<br>anhydrase<br>XIII                                      | 8.321<br>48 | 9.060<br>56 | 9.180<br>74 | 10.31<br>298 | 9.791<br>34 | 10.32<br>038 | 2.4407197<br>77  | 1.287306<br>667  | 2.440719<br>777 | Up   | 0.002966<br>312 | 0.955609<br>729 |
| 26353  | HSPB8     | Heat shock<br>protein<br>family B<br>(small)<br>member 8           | 7.414<br>83 | 5.581<br>62 | 5.567<br>15 | 4.392<br>64  | 5.266<br>75 | 4.963<br>73  | -2.4854263<br>16 | -1.31349<br>3333 | 2.485426<br>316 | Down | 0.044211<br>383 | 0.955609<br>729 |
| 29116  | MYLIP     | Myosin<br>regulatory<br>light chain<br>interacting<br>protein      | 6.596<br>71 | 7.329<br>22 | 6.504<br>54 | 7.794<br>51  | 7.539<br>27 | 7.407<br>54  | 1.7056047<br>17  | 0.770283<br>333  | 1.705604<br>717 | Up   | 0.023000<br>971 | 0.955609<br>729 |
| 7450   | VWF       | Von<br>Willebrand<br>factor                                        | 9.934<br>84 | 7.280<br>22 | 6.771<br>53 | 4.618<br>27  | 5.342<br>71 | 6.732<br>01  | -5.3934185<br>62 | -2.4312          | 5.393418<br>562 | Down | 0.033247<br>688 | 0.955609<br>729 |
| 3384   | ICAM2     | Intercellular<br>adhesion<br>molecule 2                            | 9.408<br>09 | 7.069<br>6  | 8.148<br>98 | 6.267<br>64  | 7.087<br>64 | 7.023<br>97  | -2.6680887<br>69 | -1.41580<br>6667 | 2.668088<br>769 | Down | 0.046061<br>133 | 0.955609<br>729 |
| 8436   | SDPR      | Serum<br>deprivation                                               | 9.066<br>84 | 7.514<br>55 | 7.339<br>03 | 5.181<br>44  | 7.235<br>76 | 5.623<br>37  | -3.8904849<br>53 | -1.95995         | 3.890484<br>953 | Down | 0.021856<br>267 | 0.955609<br>729 |

|        |           |                                                                 |         |         |         |         |         |         |              |              |             |      |             |             |
|--------|-----------|-----------------------------------------------------------------|---------|---------|---------|---------|---------|---------|--------------|--------------|-------------|------|-------------|-------------|
| 80704  | SLC19A3   | Solute carrier family 19 (thiamine transporter), member 3       | 7.73654 | 6.80539 | 7.81923 | 9.38266 | 8.54175 | 8.03075 | 2.294214048  | 1.198        | 2.294214048 | Up   | 0.025848971 | 0.955609729 |
| 127845 | GOLTA     | Golgi transport 1A                                              | 5.99845 | 6.77961 | 6.84567 | 8.17417 | 7.49718 | 7.41726 | 2.226781496  | 1.15496      | 2.226781496 | Up   | 0.008673497 | 0.955609729 |
| 10562  | OLFM4     | Olfactomedin 4                                                  | 3.12138 | 4.64452 | 5.00161 | 6.67413 | 5.16973 | 5.5311  | 2.899525179  | 1.535816667  | 2.899525179 | Up   | 0.03455814  | 0.955609729 |
| 2321   | FLT1      | Fms-related tyrosine kinase 1                                   | 6.9715  | 5.30175 | 5.47977 | 3.96068 | 4.10089 | 4.94421 | -2.994703836 | -1.582413333 | 2.994703836 | Down | 0.015348392 | 0.955609729 |
| 10321  | CRISP3    | Cysteine-rich secretory protein 3                               | 4.22429 | 5.16419 | 5.83304 | 8.833   | 7.39642 | 8.30312 | 8.596046776  | 3.103673333  | 8.596046776 | Up   | 0.000569554 | 0.955609729 |
| 344    | APOC2     | Apolipoprotein C-II                                             | 6.06565 | 6.58253 | 5.60903 | 6.71307 | 7.13457 | 7.14033 | 1.879375483  | 0.910253333  | 1.879375483 | Up   | 0.0153779   | 0.955609729 |
| 253635 | GPATCH11  | G-patch domain containing 11                                    | 4.3091  | 4.26509 | 4.47609 | 5.23274 | 5.19754 | 4.44669 | 1.525092414  | 0.608896667  | 1.525092414 | Up   | 0.036127545 | 0.955609729 |
| 7075   | TIE1      | Tyrosine kinase with immunoglobulin-like and EGF-like domains 1 | 7.72388 | 5.65439 | 5.631   | 4.60895 | 5.19698 | 4.87933 | -2.715723626 | -1.441336667 | 2.715723626 | Down | 0.040468995 | 0.955609729 |
| 10141  | LINC01587 | Long intergenic non-protein                                     | 5.13638 | 6.01497 | 6.12998 | 6.74036 | 6.66453 | 6.54656 | 1.853227505  | 0.89004      | 1.853227505 | Up   | 0.017391422 | 0.955609729 |

|        |         |                                                                     |         |         |         |         |         |         |              |              |             |      |             |             |
|--------|---------|---------------------------------------------------------------------|---------|---------|---------|---------|---------|---------|--------------|--------------|-------------|------|-------------|-------------|
|        |         | coding RNA<br>1587                                                  |         |         |         |         |         |         |              |              |             |      |             |             |
| 5332   | PLCB4   | Phospholipase C $\beta$ 4                                           | 5.6053  | 4.38853 | 4.74187 | 3.19283 | 4.02253 | 3.74823 | -2.390595434 | -1.25737     | 2.390595434 | Down | 0.009872289 | 0.955609729 |
| 3791   | KDR     | Kinase insert domain receptor                                       | 7.71087 | 7.03969 | 7.32382 | 5.83735 | 6.82885 | 6.75879 | -1.844372423 | -0.88313     | 1.844372423 | Down | 0.03037232  | 0.955609729 |
| 57631  | LRCH2   | Leucine-rich repeats and calponin homology (CH) domain containing 2 | 4.88502 | 4.18055 | 4.22661 | 3.66709 | 3.49055 | 3.31906 | -1.916525685 | -0.938493333 | 1.916525685 | Down | 0.003585896 | 0.955609729 |
| 2330   | FMO5    | Flavin containing monooxygenase 5                                   | 7.54629 | 8.78671 | 8.22774 | 9.60398 | 8.73291 | 9.51425 | 2.138797655  | 1.0968       | 2.138797655 | Up   | 0.023951777 | 0.955609729 |
| 27145  | FILIP1  | Filamin A interacting protein 1                                     | 6.86584 | 5.59357 | 5.31689 | 3.5379  | 5.66773 | 3.67478 | -3.099344952 | -1.631963333 | 3.099344952 | Down | 0.044167949 | 0.955609729 |
| 117177 | RAB31P  | RAB3A interacting protein                                           | 5.37832 | 6.66909 | 6.25659 | 7.25541 | 6.88418 | 7.27212 | 2.050397086  | 1.035903333  | 2.050397086 | Up   | 0.020073506 | 0.955609729 |
| 114905 | C1QTNF7 | C1q and tumor necrosis factor related protein 7                     | 6.48939 | 5.57121 | 5.63706 | 3.49797 | 5.76932 | 4.21929 | -2.645780419 | -1.403693333 | 2.645780419 | Down | 0.047836555 | 0.955609729 |
| 8566   | PDXK    | Pyridoxal (pyridoxine, vitamin B6)                                  | 5.98118 | 6.7183  | 6.59846 | 7.39628 | 7.01425 | 6.83207 | 1.567233347  | 0.64822      | 1.567233347 | Up   | 0.04339205  | 0.955609729 |

|               |                      |                                          |             |             |             |             |             |             |                  |                  |                 |      |                 |                 |
|---------------|----------------------|------------------------------------------|-------------|-------------|-------------|-------------|-------------|-------------|------------------|------------------|-----------------|------|-----------------|-----------------|
|               |                      | kinase                                   |             |             |             |             |             |             |                  |                  |                 |      |                 |                 |
| 155038        | GIMA<br>P8           | Gtpase,<br>IMAP family<br>member 8       | 7.001<br>1  | 5.726<br>07 | 5.614<br>52 | 4.674<br>28 | 4.762<br>51 | 5.595<br>95 | -2.1479841<br>29 | -1.10298<br>3333 | 2.147984<br>129 | Down | 0.039777<br>024 | 0.955609<br>729 |
| 10800         | CYSLT<br>R1          | Cysteinyl<br>leukotriene<br>receptor 1   | 5.010<br>17 | 4.318<br>17 | 4.495<br>62 | 3.834<br>07 | 3.669<br>16 | 4.004<br>54 | -1.7077103<br>94 | -0.77206<br>3333 | 1.707710<br>394 | Down | 0.007380<br>425 | 0.955609<br>729 |
| 2022          | ENG                  | Endoglin                                 | 7.762<br>2  | 6.543<br>15 | 6.738<br>35 | 4.738<br>13 | 6.334<br>54 | 6.013<br>05 | -2.4954961<br>3  | -1.31932<br>6667 | 2.495496<br>13  | Down | 0.034335<br>528 | 0.955609<br>729 |
| 8824          | CES2                 | Carboxyleste<br>rase 2                   | 8.503<br>6  | 9.224<br>69 | 9.311<br>69 | 9.842<br>45 | 9.497<br>01 | 9.587<br>93 | 1.5466391<br>81  | 0.629136<br>667  | 1.546639<br>181 | Up   | 0.043776<br>43  | 0.955609<br>729 |
| 29842         | TFCP2<br>L1          | Transcriptio<br>n factor<br>CP2-like 1   | 5.044<br>64 | 6.158<br>48 | 6.588<br>24 | 7.456<br>33 | 6.655<br>87 | 7.131<br>62 | 2.2204006<br>18  | 1.15082          | 2.220400<br>618 | Up   | 0.031153<br>081 | 0.955609<br>729 |
| 100506<br>548 | LOC10<br>050654<br>8 | Uncharacteri<br>zed<br>LOC100506<br>548  | 3.933<br>73 | 4.361<br>67 | 4.611<br>21 | 5.115<br>42 | 4.930<br>46 | 4.794<br>21 | 1.5631902<br>06  | 0.644493<br>333  | 1.563190<br>206 | Up   | 0.016281<br>603 | 0.955609<br>729 |
| 7052          | TGM2                 | Transglutami<br>nase 2                   | 4.617<br>98 | 5.185<br>71 | 4.760<br>85 | 4.302<br>47 | 4.319<br>59 | 3.633<br>67 | -1.7048009<br>87 | -0.76960<br>3333 | 1.704800<br>987 | Down | 0.016932<br>459 | 0.955609<br>729 |
| 3557          | IL1RN                | Interleukin 1<br>receptor<br>antagonist  | 6.911<br>05 | 7.106<br>89 | 7.549<br>67 | 8.340<br>07 | 7.864<br>71 | 8.011<br>99 | 1.8442744<br>13  | 0.883053<br>333  | 1.844274<br>413 | Up   | 0.007134<br>75  | 0.955609<br>729 |
| 283431        | GAS2L<br>3           | Growth<br>arrest<br>specific 2<br>like 3 | 5.843<br>76 | 6.656<br>02 | 6.689<br>61 | 7.031<br>49 | 7.498<br>87 | 6.892<br>97 | 1.6755638<br>53  | 0.744646<br>667  | 1.675563<br>853 | Up   | 0.040334<br>415 | 0.955609<br>729 |
| 813           | CALU                 | Calumenin                                | 6.717<br>47 | 5.934<br>35 | 6.392<br>63 | 5.757<br>5  | 4.930<br>46 | 5.836<br>04 | -1.7902362<br>67 | -0.84015         | 1.790236<br>267 | Down | 0.033962<br>281 | 0.955609<br>729 |
| 79827         | CLMP                 | CXADR-like<br>membrane                   | 5.437<br>74 | 4.872<br>02 | 4.719<br>77 | 3.997<br>37 | 4.340<br>12 | 4.429<br>47 | -1.6866843<br>39 | -0.75419         | 1.686684<br>339 | Down | 0.013438<br>455 | 0.955609<br>729 |

|       |         |                                                             |         |         |         |         |         |         |              |             |             |      |             |             |
|-------|---------|-------------------------------------------------------------|---------|---------|---------|---------|---------|---------|--------------|-------------|-------------|------|-------------|-------------|
| 79827 | CLMP    | CXADR-like membrane protein                                 | 5.43774 | 4.87202 | 4.71977 | 3.99737 | 4.34012 | 4.42947 | -1.686684339 | -0.75419    | 1.686684339 | Down | 0.013438455 | 0.955609729 |
| 731   | C8A     | Complement component 8, $\alpha$ polypeptide                | 5.6679  | 7.07635 | 7.07818 | 7.89073 | 7.57384 | 8.0504  | 2.347046893  | 1.230846667 | 2.347046893 | Up   | 0.020038289 | 0.955609729 |
| 9032  | TM4SF5  | Transmembrane 4 L six family member 5                       | 7.48615 | 8.34996 | 7.55443 | 9.28158 | 8.79713 | 9.25838 | 2.488914492  | 1.315516667 | 2.488914492 | Up   | 0.002700346 | 0.955609729 |
| 57453 | DSCAML1 | Down syndrome cell adhesion molecule like 1                 | 4.8363  | 5.89943 | 5.72585 | 6.9493  | 6.16729 | 6.19251 | 1.930766009  | 0.949173333 | 1.930766009 | Up   | 0.031834709 | 0.955609729 |
| 8863  | PER3    | Period circadian clock 3                                    | 3.71408 | 3.9558  | 4.05255 | 5.12874 | 4.34083 | 4.41311 | 1.647277182  | 0.720083333 | 1.647277182 | Up   | 0.018539831 | 0.955609729 |
| 22941 | SHANK2  | SH3 and multiple ankyrin repeat domains 2                   | 4.37035 | 5.48969 | 6.05202 | 6.61696 | 6.5895  | 6.18883 | 2.236242536  | 1.161076667 | 2.236242536 | Up   | 0.029243598 | 0.955609729 |
| 84676 | TRIM63  | Tripartite motif containing 63, E3 ubiquitin protein ligase | 6.09599 | 6.64266 | 6.39685 | 7.39201 | 7.70452 | 6.5989  | 1.806641182  | 0.85331     | 1.806641182 | Up   | 0.032126879 | 0.955609729 |

|        |        |                                            |             |              |              |              |             |              |                  |                  |                 |      |                 |                 |
|--------|--------|--------------------------------------------|-------------|--------------|--------------|--------------|-------------|--------------|------------------|------------------|-----------------|------|-----------------|-----------------|
| 3176   | HNMT   | Histamine N-methyltransferase              | 7.413<br>35 | 8.158<br>1   | 7.567<br>43  | 8.880<br>54  | 8.471<br>33 | 8.374<br>77  | 1.8182954<br>86  | 0.862586<br>667  | 1.818295<br>486 | Up   | 0.012637<br>379 | 0.955609<br>729 |
| 112495 | GTF3C6 | General transcription factor IIC subunit 6 | 9.779<br>74 | 10.41<br>175 | 10.25<br>122 | 11.05<br>048 | 10.52<br>22 | 10.68<br>102 | 1.5195702<br>09  | 0.603663<br>333  | 1.519570<br>209 | Up   | 0.035910<br>726 | 0.955609<br>729 |
| 3556   | IL1RAP | Interleukin 1 receptor accessory protein   | 3.408<br>2  | 3.752<br>8   | 3.786<br>95  | 4.652<br>99  | 3.973<br>58 | 4.265<br>73  | 1.5671210<br>97  | 0.648116<br>667  | 1.567121<br>097 | Up   | 0.015786<br>438 | 0.955609<br>729 |
| 1756   | DMD    | Dystrophin                                 | 8.510<br>23 | 8.996<br>32  | 8.253<br>55  | 6.793<br>9   | 8.406<br>29 | 7.200<br>25  | -2.1732989<br>91 | -1.11988<br>6667 | 2.173298<br>991 | Down | 0.038137<br>717 | 0.955609<br>729 |
| 55691  | FRMD4A | FERM domain containing 4A                  | 7.713<br>16 | 8.030<br>75  | 8.169<br>11  | 8.937<br>9   | 8.359<br>13 | 8.911<br>41  | 1.6995349<br>14  | 0.76514          | 1.699534<br>914 | Up   | 0.013027<br>478 | 0.955609<br>729 |
| 25827  | FBXL2  | F-box and leucine-rich repeat protein 2    | 6.217<br>3  | 5.304<br>58  | 5.279<br>67  | 5.121<br>59  | 4.865<br>05 | 4.618<br>33  | -1.6611626<br>43 | -0.73219<br>3333 | 1.661162<br>643 | Down | 0.042172<br>116 | 0.955609<br>729 |
| 114294 | LACTB  | Lactamase $\beta$                          | 7.353<br>44 | 7.412<br>34  | 7.293<br>55  | 8.457<br>89  | 8.057<br>28 | 8.103<br>79  | 1.8065159<br>59  | 0.85321          | 1.806515<br>959 | Up   | 0.002022<br>108 | 0.955609<br>729 |
| 27253  | PCDH17 | Protocadherin 17                           | 6.741<br>36 | 6.598<br>75  | 5.420<br>51  | 4.559<br>03  | 5.560<br>51 | 4.682<br>17  | -2.4960324<br>09 | -1.31963<br>6667 | 2.496032<br>409 | Down | 0.018543<br>892 | 0.955609<br>729 |
| 29970  | SCHIP1 | Schwannomin interacting protein 1          | 7.696<br>73 | 6.982<br>29  | 6.884<br>94  | 5.757<br>5   | 6.032<br>04 | 6.653<br>85  | -2.0564984<br>72 | -1.04019         | 2.056498<br>472 | Down | 0.014692<br>544 | 0.955609<br>729 |
| 2651   | GCNT2  | Glucosaminyl (N-acetyl) transferase 2,     | 3.327<br>65 | 3.805<br>54  | 3.942<br>79  | 4.637<br>81  | 3.961<br>58 | 4.419<br>05  | 1.5664369<br>12  | 0.647486<br>667  | 1.566436<br>912 | Up   | 0.027908<br>384 | 0.955609<br>729 |



|        |           |                                             |         |         |         |          |         |          |              |              |             |      |             |             |
|--------|-----------|---------------------------------------------|---------|---------|---------|----------|---------|----------|--------------|--------------|-------------|------|-------------|-------------|
|        |           | I-branching enzyme (I blood group)          |         |         |         |          |         |          |              |              |             |      |             |             |
| 254896 | LOC254896 | Uncharacterized LOC254896                   | 4.80854 | 5.73506 | 5.04325 | 5.94503  | 5.84501 | 5.71225  | 1.556688194  | 0.63848      | 1.556688194 | Up   | 0.043638733 | 0.955609729 |
| 140739 | UBE2F     | Ubiquitin conjugating enzyme E2F (putative) | 6.181   | 6.28889 | 5.87162 | 6.74492  | 6.84959 | 6.55013  | 1.516813104  | 0.601043333  | 1.516813104 | Up   | 0.014597746 | 0.955609729 |
| 6819   | SULT1C2   | Sulfotransferase family 1C member 2         | 6.72196 | 9.05175 | 8.68515 | 10.50008 | 9.62695 | 10.01383 | 3.716642697  | 1.894        | 3.716642697 | Up   | 0.018104673 | 0.955609729 |
| 25802  | LMOD1     | Leiomodin 1 (smooth muscle)                 | 5.19492 | 5.29232 | 5.05287 | 4.27375  | 4.99381 | 4.48647  | -1.510849545 | -0.59536     | 1.510849545 | Down | 0.026282094 | 0.955609729 |
| 84225  | ZMYND15   | Zinc finger, MYND-type containing 15        | 6.58107 | 6.81823 | 6.23839 | 7.19784  | 7.57147 | 6.76657  | 1.550496211  | 0.63273      | 1.550496211 | Up   | 0.049225283 | 0.955609729 |
| 6926   | TBX3      | T-box 3                                     | 6.1337  | 4.87552 | 5.08924 | 4.10509  | 4.50374 | 4.54666  | -1.97381941  | -0.98099     | 1.97381941  | Down | 0.024886922 | 0.955609729 |
| 26255  | PTTG3P    | Pituitary tumor-transforming 3, pseudogene  | 4.93315 | 5.63362 | 5.28491 | 4.54147  | 4.87043 | 4.62444  | -1.521098241 | -0.605113333 | 1.521098241 | Down | 0.025409802 | 0.955609729 |
| 1265   | CNN2      | Calponin 2                                  | 4.01497 | 4.08674 | 4.70155 | 3.44111  | 3.94468 | 3.60025  | -1.521759107 | -0.60574     | 1.521759107 | Down | 0.032090405 | 0.955609729 |
| 57669  | EPB41L5   | Erythrocyte membrane                        | 4.80564 | 5.29013 | 5.54639 | 6.3026   | 5.69453 | 5.79819  | 1.644580924  | 0.71772      | 1.644580924 | Up   | 0.028697357 | 0.955609729 |

|           |        |                                                           |          |         |         |          |         |         |              |              |             |      |             |             |
|-----------|--------|-----------------------------------------------------------|----------|---------|---------|----------|---------|---------|--------------|--------------|-------------|------|-------------|-------------|
|           |        | protein band 4.1 like 5                                   |          |         |         |          |         |         |              |              |             |      |             |             |
| 101059938 | NPIPA7 | Nuclear pore complex interacting protein family member A7 | 6.70725  | 7.99302 | 7.37651 | 8.22062  | 8.13039 | 8.1216  | 1.739424428  | 0.79861      | 1.739424428 | Up   | 0.043520998 | 0.955609729 |
| 1272      | CNTN1  | Contactin 1                                               | 6.73803  | 5.52298 | 4.6665  | 2.72684  | 5.22865 | 3.23164 | -3.767114803 | -1.91346     | 3.767114803 | Down | 0.041615226 | 0.955609729 |
| 2118      | ETV4   | Ets variant 4                                             | 7.32345  | 9.03845 | 8.52    | 9.52311  | 9.29648 | 9.15458 | 2.043095536  | 1.030756667  | 2.043095536 | Up   | 0.047399034 | 0.955609729 |
| 3480      | IGF1R  | Insulin like growth factor 1 receptor                     | 6.00857  | 5.92714 | 5.93501 | 4.78577  | 5.65894 | 5.54104 | -1.545767494 | -0.628323333 | 1.545767494 | Down | 0.042208471 | 0.955609729 |
| 54843     | SYTL2  | Synaptotagmin like 2                                      | 7.0938   | 6.70177 | 6.87649 | 6.38644  | 6.281   | 5.87108 | -1.637142611 | -0.71118     | 1.637142611 | Down | 0.011485561 | 0.955609729 |
| 6167      | RPL37  | Ribosomal protein L37                                     | 3.93373  | 4.36167 | 4.61121 | 5.11542  | 4.93046 | 4.79421 | 1.563190206  | 0.644493333  | 1.563190206 | Up   | 0.016281603 | 0.955609729 |
| 55715     | DOK4   | Docking protein 4                                         | 8.93015  | 9.71637 | 9.18168 | 10.14918 | 9.69306 | 9.84028 | 1.534859573  | 0.618106667  | 1.534859573 | Up   | 0.042767586 | 0.955609729 |
| 11037     | STON1  | Stonin 1                                                  | 7.88192  | 6.61149 | 6.30419 | 4.41444  | 6.56373 | 4.87711 | -3.132772487 | -1.64744     | 3.132772487 | Down | 0.039128042 | 0.955609729 |
| 25890     | ABI3BP | ABI family member 3 binding protein                       | 10.54479 | 9.74565 | 9.77358 | 9.5229   | 9.23296 | 9.05153 | -1.684371068 | -0.75221     | 1.684371068 | Down | 0.026617833 | 0.955609729 |
| 79974     | CPED1  | Cadherin-like and PC-esterase                             | 5.82375  | 5.01713 | 4.26789 | 3.82405  | 4.37463 | 3.8681  | -2.019497929 | -1.013996667 | 2.019497929 | Down | 0.036534141 | 0.955609729 |

|        |          |                                                        |          |         |         |         |         |         |              |              |             |      |             |             |
|--------|----------|--------------------------------------------------------|----------|---------|---------|---------|---------|---------|--------------|--------------|-------------|------|-------------|-------------|
| 79974  | CPED1    | Cadherin-like and PC-esterase domain containing 1      | 5.82375  | 5.01713 | 4.26789 | 3.82405 | 4.37463 | 3.8681  | -2.019497929 | -1.013996667 | 2.019497929 | Down | 0.036534141 | 0.955609729 |
| 3148   | HMGB2    | High mobility group box 2                              | 8.89441  | 7.78942 | 8.5038  | 6.77996 | 7.35421 | 7.36426 | -2.345236367 | -1.229733333 | 2.345236367 | Down | 0.007406759 | 0.955609729 |
| 84513  | PLPP5    | Phospholipid phosphatase 5                             | 4.23119  | 4.91952 | 4.9017  | 5.37328 | 5.41148 | 5.17187 | 1.552657907  | 0.63474      | 1.552657907 | Up   | 0.024744828 | 0.955609729 |
| 384    | ARG2     | Arginase 2                                             | 4.2979   | 4.78344 | 4.60113 | 5.30527 | 5.21602 | 5.18457 | 1.596002967  | 0.674463333  | 1.596002967 | Up   | 0.004831871 | 0.955609729 |
| 136895 | C7orf31  | Chromosome 7 open reading frame 31                     | 4.9425   | 5.01029 | 4.77859 | 5.54421 | 5.16326 | 5.96539 | 1.566082267  | 0.64716      | 1.566082267 | Up   | 0.025056329 | 0.955609729 |
| 89122  | TRIM4    | Tripartite motif containing 4                          | 3.41149  | 4.59812 | 4.36346 | 4.8958  | 4.96467 | 4.77823 | 1.687877263  | 0.75521      | 1.687877263 | Up   | 0.043303095 | 0.955609729 |
| 94274  | PPP1R14A | Protein phosphatase 1 regulatory inhibitor subunit 14A | 10.45587 | 9.18509 | 8.8964  | 6.41756 | 9.27033 | 6.47619 | -4.360297785 | -2.124426667 | 4.360297785 | Down | 0.039001009 | 0.955609729 |
| 1906   | EDN1     | Endothelin 1                                           | 6.65554  | 7.08405 | 6.93454 | 7.91204 | 7.33735 | 7.32048 | 1.549618769  | 0.631913333  | 1.549618769 | Up   | 0.029390674 | 0.955609729 |
| 258010 | SVIP     | Small VCP/p97-interacting protein                      | 6.6531   | 7.1359  | 7.19398 | 7.65916 | 7.25663 | 7.84139 | 1.506708157  | 0.5914       | 1.506708157 | Up   | 0.042292622 | 0.955609729 |

|               |                     |                                                                                               |             |             |             |              |             |              |                  |                  |                 |      |                 |                 |
|---------------|---------------------|-----------------------------------------------------------------------------------------------|-------------|-------------|-------------|--------------|-------------|--------------|------------------|------------------|-----------------|------|-----------------|-----------------|
| 3688          | ITGB1               | Integrin $\beta$ 1                                                                            | 9.849<br>64 | 9.491<br>64 | 9.243<br>73 | 8.613<br>38  | 8.209<br>69 | 9.043<br>25  | -1.8741416<br>53 | -0.90623         | 1.874141<br>653 | Down | 0.012743<br>935 | 0.955609<br>729 |
| 1646          | AKR1<br>C2          | Aldo-keto<br>reductase<br>family 1,<br>member C2                                              | 5.737<br>96 | 5.858<br>01 | 6.007<br>76 | 5.228<br>46  | 5.489<br>21 | 5.111<br>16  | -1.5069518<br>63 | -0.59163<br>3333 | 1.506951<br>863 | Down | 0.010684<br>943 | 0.955609<br>729 |
| 6563          | SLC14<br>A1         | Solute<br>carrier<br>family 14<br>(urea<br>transporter),<br>member 1<br>(Kidd blood<br>group) | 7.800<br>77 | 8.985<br>18 | 7.495<br>24 | 10.46<br>218 | 8.328<br>55 | 10.12<br>263 | 2.9161332<br>96  | 1.544056<br>667  | 2.916133<br>296 | Up   | 0.047389<br>682 | 0.955609<br>729 |
| 1184          | CLCN5               | Chloride<br>channel,<br>voltage-sensi<br>tive 5                                               | 5.770<br>26 | 6.881<br>18 | 6.491<br>32 | 7.345<br>52  | 7.229<br>33 | 6.880<br>08  | 1.7061249<br>8   | 0.770723<br>333  | 1.706124<br>98  | Up   | 0.042790<br>82  | 0.955609<br>729 |
| 18            | ABAT                | 4-aminobuty<br>rate<br>aminotransfe<br>rase                                                   | 6.213<br>85 | 6.909<br>8  | 6.152<br>04 | 7.082<br>76  | 6.799<br>26 | 7.434<br>79  | 1.6025544<br>02  | 0.680373<br>333  | 1.602554<br>402 | Up   | 0.044318<br>313 | 0.955609<br>729 |
| 158471        | PRUN<br>E2          | Prune<br>homolog 2<br>(Drosophila)                                                            | 7.290<br>53 | 7.080<br>48 | 7.038<br>87 | 5.913<br>21  | 7.046<br>1  | 5.469<br>99  | -1.9910461<br>57 | -0.99352<br>6667 | 1.991046<br>157 | Down | 0.041461<br>144 | 0.955609<br>729 |
| 22915         | MMRN<br>1           | Multimerin 1                                                                                  | 9.652<br>41 | 6.382<br>2  | 6.293<br>8  | 4.489<br>01  | 5.462<br>21 | 5.474<br>51  | -4.9276279<br>53 | -2.30089<br>3333 | 4.927627<br>953 | Down | 0.039715<br>474 | 0.955609<br>729 |
| 100127<br>888 | SLCO4<br>A1-AS<br>1 | SLCO4A1<br>antisense<br>RNA 1                                                                 | 4.170<br>18 | 4.858<br>7  | 4.793<br>99 | 7.002<br>98  | 5.381<br>79 | 6.296<br>23  | 3.0724225<br>99  | 1.619376<br>667  | 3.072422<br>599 | Up   | 0.006932<br>207 | 0.955609<br>729 |
| 55701         | ARHG                | Rho guanine                                                                                   | 6.143       | 6.806       | 6.608       | 7.355        | 7.031       | 7.033        | 1.5375357        | 0.62062          | 1.537535        | Up   | 0.029101        | 0.955609        |

|           |         |                                                             |         |         |         |         |         |         |              |              |             |      |             |             |
|-----------|---------|-------------------------------------------------------------|---------|---------|---------|---------|---------|---------|--------------|--------------|-------------|------|-------------|-------------|
|           | EF40    | nucleotide exchange factor (GEF) 40                         | 29      | 11      | 19      | 11      | 19      | 15      | 97           |              | 797         |      | 318         | 729         |
| 9750      | FAM65 B | Family with sequence similarity 65 member B                 | 5.52047 | 4.07092 | 5.34741 | 3.85403 | 3.66189 | 4.22593 | -2.09311271  | -1.06565     | 2.09311271  | Down | 0.030867911 | 0.955609729 |
| 3235      | HOXD9   | Homeobox D9                                                 | 5.34209 | 4.8357  | 4.8743  | 4.10841 | 4.69016 | 4.32743 | -1.56052341  | -0.64203     | 1.56052341  | Down | 0.021005711 | 0.955609729 |
| 2669      | GEM     | GTP binding protein overexpressed in skeletal muscle        | 7.36613 | 5.85017 | 5.09269 | 3.68372 | 5.25079 | 4.37497 | -3.174442692 | -1.666503333 | 3.174442692 | Down | 0.036218487 | 0.955609729 |
| 10550     | ARL6IP5 | ADP ribosylation factor like gtpase 6 interacting protein 5 | 10.3226 | 9.92641 | 9.48523 | 9.30428 | 9.08938 | 9.44007 | -1.551327552 | -0.633503333 | 1.551327552 | Down | 0.037114281 | 0.955609729 |
| 54206     | ERRFI1  | ERBB receptor feedback inhibitor 1                          | 9.88726 | 8.77667 | 9.1962  | 8.52721 | 8.45321 | 8.66681 | -1.667438248 | -0.737633333 | 1.667438248 | Down | 0.040187127 | 0.955609729 |
| 100134934 | TEN1    | TEN1 CST complex subunit                                    | 6.63976 | 6.40313 | 6.80187 | 7.40334 | 7.13034 | 7.3433  | 1.599262397  | 0.677406667  | 1.599262397 | Up   | 0.007672476 | 0.955609729 |
| 406       | ARNTL   | Aryl hydrocarbon receptor                                   | 7.18308 | 6.62266 | 6.65851 | 5.3651  | 6.33485 | 4.77137 | -2.515729255 | -1.330976667 | 2.515729255 | Down | 0.014163897 | 0.955609729 |

|        |          |                                                            |         |          |         |          |          |          |              |              |             |      |             |             |
|--------|----------|------------------------------------------------------------|---------|----------|---------|----------|----------|----------|--------------|--------------|-------------|------|-------------|-------------|
|        |          | nuclear translocator like                                  |         |          |         |          |          |          |              |              |             |      |             |             |
| 285596 | FAM153A  | Family with sequence similarity 153 member A               | 3.68869 | 4.0597   | 3.03113 | 3.96192  | 4.77083  | 4.72872  | 1.85829988   | 0.893983333  | 1.85829988  | Up   | 0.029300486 | 0.955609729 |
| 81557  | MAGE D4B | Melanoma antigen family D4B                                | 5.46145 | 6.50094  | 4.99384 | 6.90646  | 6.98994  | 6.87491  | 2.414447901  | 1.271693333  | 2.414447901 | Up   | 0.012137053 | 0.955609729 |
| 2294   | FOXF1    | Forkhead box F1                                            | 7.22093 | 7.81116  | 7.83101 | 5.61615  | 7.29407  | 5.92498  | -2.536138147 | -1.342633333 | 2.536138147 | Down | 0.021787513 | 0.955609729 |
| 8857   | FCGBP    | Fc fragment of igg binding protein                         | 11.1842 | 11.43776 | 13.1499 | 13.29505 | 13.17828 | 13.35627 | 2.553683977  | 1.35258      | 2.553683977 | Up   | 0.0301196   | 0.955609729 |
| 1628   | DBP      | D site of albumin promoter (albumin D-box) binding protein | 5.9074  | 6.78317  | 6.87615 | 8.1046   | 6.76394  | 7.93155  | 2.110800163  | 1.07779      | 2.110800163 | Up   | 0.041609543 | 0.955609729 |
| 392465 | GLOD5    | Glyoxalase domain containing 5                             | 5.00693 | 5.81513  | 5.23952 | 6.00501  | 6.20271  | 5.89121  | 1.601159097  | 0.679116667  | 1.601159097 | Up   | 0.026499041 | 0.955609729 |
| 2982   | GUCY1A3  | Guanylate cyclase 1, soluble, $\alpha$ 3                   | 6.05175 | 5.68398  | 5.84307 | 5.06444  | 4.27531  | 5.62421  | -1.829707878 | -0.871613333 | 1.829707878 | Down | 0.038606931 | 0.955609729 |
| 10631  | POSTN    | Periostin,                                                 | 6.025   | 4.915    | 4.687   | 3.911    | 4.032    | 4.470    | -2.1010638   | -1.07112     | 2.101063    | Down | 0.022666    | 0.955609    |

|       |         |                                                             |         |         |         |         |         |         |              |              |             |      |             |             |
|-------|---------|-------------------------------------------------------------|---------|---------|---------|---------|---------|---------|--------------|--------------|-------------|------|-------------|-------------|
| 10631 | POSTN   | Periostin, osteoblast specific factor                       | 6.02537 | 4.91566 | 4.68719 | 3.91176 | 4.03273 | 4.47037 | -2.101063842 | -1.07112     | 2.101063842 | Down | 0.02266663  | 0.955609729 |
| 57144 | PAK7    | P21 protein (Cdc42/Rac)-activated kinase 7                  | 5.37311 | 6.86432 | 6.32054 | 7.6433  | 6.82699 | 8.05523 | 2.501020125  | 1.322516667  | 2.501020125 | Up   | 0.025155416 | 0.955609729 |
| 5142  | PDE4B   | Phosphodiesterase 4B                                        | 7.27315 | 4.17499 | 5.53822 | 3.26901 | 4.05672 | 4.11344 | -3.60266207  | -1.849063333 | 3.60266207  | Down | 0.041430237 | 0.955609729 |
| 25780 | RASGRP3 | RAS guanyl releasing protein 3 (calcium and DAG-regulated)  | 6.21067 | 5.89315 | 6.53161 | 5.0368  | 5.77098 | 5.60738 | -1.670280033 | -0.74009     | 1.670280033 | Down | 0.026707015 | 0.955609729 |
| 1952  | CELSR2  | Cadherin, EGF LAG seven-pass G-type receptor 2              | 4.8278  | 5.59241 | 5.44282 | 6.30749 | 5.68073 | 5.86834 | 1.585029839  | 0.66451      | 1.585029839 | Up   | 0.042945799 | 0.955609729 |
| 9630  | GNA14   | Guanine nucleotide binding protein (G protein), $\alpha$ 14 | 5.48101 | 4.1776  | 4.56219 | 2.98759 | 3.95265 | 3.53521 | -2.375860286 | -1.24845     | 2.375860286 | Down | 0.014615645 | 0.955609729 |
| 2259  | FGF14   | Fibroblast growth factor 14                                 | 4.31395 | 4.86193 | 4.91523 | 6.35476 | 4.92148 | 6.0785  | 2.125609627  | 1.087876667  | 2.125609627 | Up   | 0.02868893  | 0.955609729 |
| 1368  | CPM     | Carboxypeptidase                                            | 6.496   | 6.644   | 6.014   | 7.583   | 6.570   | 7.612   | 1.8283048    | 0.870506     | 1.828304    | Up   | 0.036970    | 0.955609    |

|        |         |                                            |              |             |             |             |             |             |                  |                 |                 |      |                 |                 |
|--------|---------|--------------------------------------------|--------------|-------------|-------------|-------------|-------------|-------------|------------------|-----------------|-----------------|------|-----------------|-----------------|
| 63982  | ANO3    | Anoctamin 3                                | 6.867<br>75  | 8.893<br>33 | 8.030<br>12 | 9.536<br>31 | 8.726<br>12 | 9.307<br>52 | 2.3942658<br>18  | 1.259583<br>333 | 2.394265<br>818 | Up   | 0.044636<br>301 | 0.955609<br>729 |
| 2147   | F2      | Coagulation factor II (thrombin)           | 6.466<br>43  | 6.952<br>24 | 6.943<br>69 | 7.183<br>38 | 7.264<br>17 | 7.824<br>88 | 1.5547579<br>56  | 0.63669         | 1.554757<br>956 | Up   | 0.037055<br>224 | 0.955609<br>729 |
| 135656 | DPCR1   | Diffuse panbronchiolitis critical region 1 | 6.956<br>42  | 8.883<br>16 | 6.366<br>44 | 9.051<br>11 | 8.678<br>17 | 9.556<br>37 | 3.2337541<br>49  | 1.69321         | 3.233754<br>149 | Up   | 0.033804<br>94  | 0.955609<br>729 |
| 283377 | SPRY D4 | SPRY domain containing 4                   | 6.149<br>15  | 6.896<br>2  | 6.426<br>47 | 7.014<br>93 | 7.348<br>58 | 6.917<br>37 | 1.5188927<br>46  | 0.60302         | 1.518892<br>746 | Up   | 0.043465<br>866 | 0.955609<br>729 |
| 26230  | TIAM2   | T-cell lymphoma invasion and metastasis 2  | 6.066<br>14  | 6.958<br>17 | 6.293<br>99 | 7.156       | 6.995<br>97 | 7.007<br>19 | 1.5300936<br>96  | 0.61362         | 1.530093<br>696 | Up   | 0.048179<br>562 | 0.955609<br>729 |
| 84159  | ARID5 B | AT-rich interaction domain 5B              | 4.630<br>65  | 5.588<br>4  | 5.761<br>94 | 6.038<br>61 | 5.919<br>48 | 6.323<br>49 | 1.7015662<br>62  | 0.766863<br>333 | 1.701566<br>262 | Up   | 0.047927<br>243 | 0.955609<br>729 |
| 642475 | MROH 6  | Maestro heat-like repeat family member 6   | 6.118<br>98  | 6.779<br>02 | 6.349<br>3  | 7.391<br>73 | 6.914<br>39 | 7.180<br>86 | 1.6777874<br>97  | 0.74656         | 1.677787<br>497 | Up   | 0.015790<br>581 | 0.955609<br>729 |
| 283232 | TMEM 80 | Transmembrane protein 80                   | 5.563<br>93  | 5.494<br>29 | 5.321<br>87 | 6.304<br>92 | 5.779<br>49 | 6.244<br>39 | 1.5687005<br>7   | 0.64957         | 1.568700<br>57  | Up   | 0.013287<br>37  | 0.955609<br>729 |
| 5019   | OXCT 1  | 3-oxoacid coa-transferase 1                | 7.196<br>74  | 5.273<br>36 | 5.036<br>36 | 3.789<br>1  | 5.010<br>63 | 4.294<br>45 | -2.7716786<br>49 | -1.47076        | 2.771678<br>649 | Down | 0.047993<br>631 | 0.955609<br>729 |
| 5175   | PECA M1 | Platelet/endothelial cell                  | 10.68<br>623 | 8.831<br>93 | 8.832<br>37 | 7.493<br>24 | 8.002<br>27 | 8.438<br>6  | -2.7743311<br>48 | -1.47214        | 2.774331<br>148 | Down | 0.031146<br>665 | 0.955609<br>729 |



|        |              |                                                                |              |             |             |             |             |             |                  |                  |                 |      |                 |                 |
|--------|--------------|----------------------------------------------------------------|--------------|-------------|-------------|-------------|-------------|-------------|------------------|------------------|-----------------|------|-----------------|-----------------|
| 5175   | PECA<br>M1   | Platelet/endo<br>thelial cell<br>adhesion<br>molecule 1        | 10.68<br>623 | 8.831<br>93 | 8.832<br>37 | 7.493<br>24 | 8.002<br>27 | 8.438<br>6  | -2.7743311<br>48 | -1.47214         | 2.774331<br>148 | Down | 0.031146<br>665 | 0.955609<br>729 |
| 166348 | KBTB<br>D12  | Kelch repeat<br>and BTB<br>(POZ)<br>domain<br>containing<br>12 | 4.944<br>59  | 5.291<br>88 | 4.474<br>9  | 5.280<br>86 | 5.588<br>82 | 6.374<br>17 | 1.7952191<br>86  | 0.84416          | 1.795219<br>186 | Up   | 0.042023<br>686 | 0.955609<br>729 |
| 399669 | ZNF32<br>1P  | Zinc finger<br>protein 321,<br>pseudogene                      | 5.425<br>65  | 6.603<br>86 | 6.313<br>97 | 7.304<br>41 | 7.404<br>59 | 6.637<br>12 | 2.0012203<br>11  | 1.00088          | 2.001220<br>311 | Up   | 0.028817<br>304 | 0.955609<br>729 |
| 85480  | TSLP         | Thymic<br>stromal<br>lymphopoieti<br>n                         | 4.642<br>21  | 3.873<br>23 | 4.571<br>03 | 3.007<br>28 | 3.917<br>12 | 3.192<br>98 | -1.9857674<br>3  | -0.98969<br>6667 | 1.985767<br>43  | Down | 0.014214<br>436 | 0.955609<br>729 |
| 9720   | CCDC<br>144A | Coiled-coil<br>domain<br>containing<br>144A                    | 4.166<br>57  | 3.233<br>21 | 3.508<br>29 | 4.601<br>31 | 4.337<br>06 | 4.139<br>17 | 1.6507900<br>72  | 0.723156<br>667  | 1.650790<br>072 | Up   | 0.026880<br>281 | 0.955609<br>729 |
| 3306   | HSPA2        | Heat shock<br>protein<br>family A<br>(Hsp70)<br>member 2       | 6.613<br>05  | 5.412<br>62 | 5.065<br>84 | 4.949<br>17 | 4.493<br>23 | 4.732<br>58 | -1.9617982<br>27 | -0.97217<br>6667 | 1.961798<br>227 | Down | 0.045787<br>785 | 0.955609<br>729 |
| 202134 | FAM15<br>3B  | Family with<br>sequence<br>similarity<br>153 member<br>B       | 3.688<br>69  | 4.059<br>7  | 3.031<br>13 | 3.961<br>92 | 4.770<br>83 | 4.728<br>72 | 1.8582998<br>8   | 0.893983<br>333  | 1.858299<br>88  | Up   | 0.029300<br>486 | 0.955609<br>729 |

|        |             |                                                                 |         |         |         |          |          |          |              |              |             |      |             |             |
|--------|-------------|-----------------------------------------------------------------|---------|---------|---------|----------|----------|----------|--------------|--------------|-------------|------|-------------|-------------|
| 6580   | SLC22<br>A1 | Solute carrier family 22 (organic cation transporter), member 1 | 5.30967 | 6.05123 | 5.59142 | 7.1748   | 6.7265   | 6.81397  | 2.385541305  | 1.254316667  | 2.385541305 | Up   | 0.001493611 | 0.955609729 |
| 83661  | MS4A8       | Membrane-spanning 4-domains, subfamily A, member 8              | 6.14081 | 7.34354 | 6.97255 | 7.90313  | 7.64616  | 7.91508  | 2.003454854  | 1.00249      | 2.003454854 | Up   | 0.016940921 | 0.955609729 |
| 84707  | BEX2        | Brain expressed X-linked 2                                      | 6.63786 | 7.99549 | 7.36425 | 8.41969  | 8.27601  | 8.17895  | 1.943984434  | 0.959016667  | 1.943984434 | Up   | 0.026864701 | 0.955609729 |
| 81606  | LBH         | Limb bud and heart development                                  | 5.17806 | 5.0556  | 5.49202 | 3.87392  | 4.81064  | 4.5123   | -1.79370172  | -0.84294     | 1.79370172  | Down | 0.015947821 | 0.955609729 |
| 116159 | CYYR1       | Cysteine/tyrosine-rich 1                                        | 8.03254 | 6.17836 | 5.96907 | 4.62117  | 5.44168  | 5.55978  | -2.866148447 | -1.519113333 | 2.866148447 | Down | 0.034379184 | 0.955609729 |
| 1733   | DIO1        | Deiodinase, iodothyronine, type I                               | 5.29794 | 6.07712 | 5.18107 | 7.58129  | 7.67892  | 7.43856  | 4.13402372   | 2.047546667  | 4.13402372  | Up   | 0.000144984 | 0.955609729 |
| 5340   | PLG         | Plasminogen                                                     | 4.23045 | 4.01421 | 4.60298 | 5.44372  | 4.84777  | 6.03869  | 2.235886054  | 1.160846667  | 2.235886054 | Up   | 0.009069436 | 0.955609729 |
| 29094  | LGALSL      | Lectin, galactoside-binding-like                                | 4.19306 | 3.77977 | 4.00931 | 4.96714  | 4.3767   | 4.60698  | 1.575955356  | 0.656226667  | 1.575955356 | Up   | 0.01192686  | 0.955609729 |
| 563    | AZGP1       | A-2-glycoprotein 1, zinc-binding                                | 9.25307 | 9.53399 | 9.54028 | 10.10918 | 10.01544 | 10.40746 | 1.664297487  | 0.734913333  | 1.664297487 | Up   | 0.004879748 | 0.955609729 |

|        |          |                                              |          |         |         |         |         |         |              |              |             |      |             |             |
|--------|----------|----------------------------------------------|----------|---------|---------|---------|---------|---------|--------------|--------------|-------------|------|-------------|-------------|
| 1903   | S1PR3    | Sphingosine-1-phosphate receptor 3           | 7.11302  | 6.41307 | 6.11461 | 4.17265 | 6.185   | 4.49489 | -3.023151614 | -1.596053333 | 3.023151614 | Down | 0.024359796 | 0.955609729 |
| 1124   | CHN2     | Chimerin 2                                   | 6.36212  | 6.49398 | 6.0664  | 7.48578 | 6.96308 | 7.84714 | 2.180259714  | 1.1245       | 2.180259714 | Up   | 0.004104425 | 0.955609729 |
| 81889  | FAHD1    | Fumarylacetate hydrolase domain containing 1 | 6.25413  | 7.09605 | 7.03754 | 8.06332 | 7.23935 | 8.13271 | 2.022145302  | 1.015886667  | 2.022145302 | Up   | 0.020727037 | 0.955609729 |
| 8404   | SPARC L1 | SPARC like 1                                 | 11.127   | 9.718   | 9.3434  | 6.20234 | 8.75185 | 8.02838 | -5.285146027 | -2.401943333 | 5.285146027 | Down | 0.014673519 | 0.955609729 |
| 116441 | TM4SF18  | Transmembrane 4 L six family member 18       | 6.82149  | 5.4237  | 5.36562 | 3.47865 | 4.54942 | 5.06364 | -2.840936661 | -1.506366667 | 2.840936661 | Down | 0.026313601 | 0.955609729 |
| 9099   | USP2     | Ubiquitin specific peptidase 2               | 5.79999  | 5.86956 | 5.10962 | 7.16723 | 6.14325 | 6.40313 | 1.969933142  | 0.978146667  | 1.969933142 | Up   | 0.023009257 | 0.955609729 |
| 56650  | CLDN D1  | Claudin domain containing 1                  | 7.72055  | 6.77058 | 6.90828 | 6.67668 | 5.85459 | 6.28875 | -1.814782517 | -0.859796667 | 1.814782517 | Down | 0.035154111 | 0.955609729 |
| 928    | CD9      | CD9 molecule                                 | 10.46311 | 9.34192 | 8.82678 | 7.26125 | 8.56255 | 8.33256 | -2.812428982 | -1.491816667 | 2.812428982 | Down | 0.022532912 | 0.955609729 |
| 147184 | TMEM99   | Transmembrane protein 99                     | 7.6947   | 7.40063 | 7.99927 | 8.61261 | 8.21407 | 8.31538 | 1.604903626  | 0.682486667  | 1.604903626 | Up   | 0.016788476 | 0.955609729 |
| 9975   | NR1D2    | Nuclear receptor subfamily 1 group D         | 4.85903  | 5.46269 | 6.11962 | 7.25161 | 5.93168 | 6.98962 | 2.368307918  | 1.243856667  | 2.368307918 | Up   | 0.027483549 | 0.955609729 |

|           |              |                                                                      |          |         |         |         |         |         |              |              |             |      |             |             |
|-----------|--------------|----------------------------------------------------------------------|----------|---------|---------|---------|---------|---------|--------------|--------------|-------------|------|-------------|-------------|
| 9975      | NR1D2        | Nuclear receptor subfamily 1 group D member 2                        | 4.85903  | 5.46269 | 6.11962 | 7.25161 | 5.93168 | 6.98962 | 2.368307918  | 1.243856667  | 2.368307918 | Up   | 0.027483549 | 0.955609729 |
| 100507387 | LOC100507387 | Uncharacterized LOC100507387                                         | 3.68869  | 4.0597  | 3.03113 | 3.96192 | 4.77083 | 4.72872 | 1.85829988   | 0.893983333  | 1.85829988  | Up   | 0.029300486 | 0.955609729 |
| 55824     | PAG1         | Phosphoprotein membrane anchor with glycosphingolipid microdomains 1 | 6.39276  | 6.96324 | 7.0421  | 7.85755 | 7.23139 | 7.51684 | 1.665428403  | 0.735893333  | 1.665428403 | Up   | 0.024654731 | 0.955609729 |
| 2697      | GJA1         | Gap junction protein $\alpha$ 1                                      | 4.52831  | 3.88593 | 4.40262 | 3.49652 | 3.85942 | 3.69677 | -1.503213575 | -0.58805     | 1.503213575 | Down | 0.021184342 | 0.955609729 |
| 285       | ANGPT2       | Angiopoietin 2                                                       | 5.43242  | 4.39169 | 4.85051 | 4.23567 | 4.41553 | 3.70837 | -1.70726065  | -0.771683333 | 1.70726065  | Down | 0.040615126 | 0.955609729 |
| 9532      | BAG2         | BCL2 associated athanogene 2                                         | 6.83576  | 5.91758 | 6.54848 | 5.11312 | 5.69073 | 5.62249 | -1.943279387 | -0.958493333 | 1.943279387 | Down | 0.013434065 | 0.955609729 |
| 6678      | SPARC        | Secreted protein, acidic, cysteine-rich (osteonectin)                | 11.18178 | 8.46127 | 7.67109 | 4.62444 | 7.44996 | 7.1419  | -6.49477704  | -2.69928     | 6.49477704  | Down | 0.043319277 | 0.955609729 |
| 79924     | ADM2         | Adrenomedullin 2                                                     | 5.39346  | 6.53322 | 6.01058 | 6.84164 | 6.71039 | 6.53299 | 1.642530318  | 0.71592      | 1.642530318 | Up   | 0.049580221 | 0.955609729 |

|        |             |                                                       |          |          |          |          |          |          |              |              |             |      |             |             |
|--------|-------------|-------------------------------------------------------|----------|----------|----------|----------|----------|----------|--------------|--------------|-------------|------|-------------|-------------|
| 4495   | MT1G        | Metallothionein 1G                                    | 10.14394 | 10.70426 | 10.48559 | 12.04633 | 11.76997 | 12.34409 | 3.050121402  | 1.608866667  | 3.050121402 | Up   | 0.00019533  | 0.955609729 |
| 1397   | CRIP2       | Cysteine-rich protein 2                               | 8.29507  | 7.855    | 8.32589  | 7.64456  | 6.96443  | 7.776    | -1.621119003 | -0.69699     | 1.621119003 | Down | 0.036913353 | 0.955609729 |
| 153562 | MARVELD2    | MARVEL domain containing 2                            | 6.56864  | 8.40885  | 8.34554  | 9.40837  | 8.63983  | 9.03904  | 2.38623589   | 1.254736667  | 2.38623589  | Up   | 0.0472142   | 0.955609729 |
| 7780   | SLC30A2     | Solute carrier family 30 (zinc transporter), member 2 | 8.71561  | 10.00072 | 9.85077  | 10.59677 | 10.4356  | 10.72555 | 2.090150269  | 1.063606667  | 2.090150269 | Up   | 0.019267779 | 0.955609729 |
| 445815 | PALM2-AKAP2 | PALM2-AKAP2 readthrough                               | 10.14756 | 8.85323  | 9.06801  | 8.56371  | 8.50612  | 8.51151  | -1.776642408 | -0.829153333 | 1.776642408 | Down | 0.046346954 | 0.955609729 |
| 84172  | POLR1B      | Polymerase I polypeptide B                            | 4.75452  | 5.0159   | 5.22821  | 5.51181  | 5.92182  | 5.75452  | 1.658455153  | 0.72984      | 1.658455153 | Up   | 0.006954787 | 0.955609729 |
| 80343  | SEL1L2      | Sel-1 suppressor of lin-12-like 2 (C. Elegans)        | 4.85057  | 4.58405  | 4.65116  | 3.73292  | 4.36926  | 3.95275  | -1.598756251 | -0.67695     | 1.598756251 | Down | 0.009486051 | 0.955609729 |
| 58494  | JAM2        | Junctional adhesion molecule 2                        | 5.97316  | 4.51812  | 3.9626   | 3.05466  | 3.8649   | 3.67332  | -2.440201021 | -1.287       | 2.440201021 | Down | 0.041366636 | 0.955609729 |
| 9058   | SLC13A2     | Solute carrier family 13 (sodium-dep                  | 9.00713  | 9.87465  | 9.31711  | 10.40636 | 10.04087 | 10.43    | 1.856750543  | 0.89278      | 1.856750543 | Up   | 0.011123921 | 0.955609729 |

|           |        |                                                           |         |         |         |         |         |         |              |              |             |      |             |             |
|-----------|--------|-----------------------------------------------------------|---------|---------|---------|---------|---------|---------|--------------|--------------|-------------|------|-------------|-------------|
|           |        | endent dicarboxylate transporter), member 2               |         |         |         |         |         |         |              |              |             |      |             |             |
| 79783     | SUGCT  | Succinyl-coa :glutarate-coa transferase                   | 5.22474 | 5.70132 | 6.10452 | 4.27268 | 5.32878 | 4.83122 | -1.822560451 | -0.865966667 | 1.822560451 | Down | 0.036466042 | 0.955609729 |
| 100288332 | NPIPA5 | Nuclear pore complex interacting protein family member A5 | 6.70725 | 7.99302 | 7.37651 | 8.22062 | 8.13039 | 8.1216  | 1.739424428  | 0.79861      | 1.739424428 | Up   | 0.043520998 | 0.955609729 |
| 25777     | SUN2   | Sad1 and UNC84 domain containing 2                        | 5.05381 | 4.68023 | 5.0998  | 4.58228 | 4.02772 | 4.36094 | -1.537905298 | -0.620966667 | 1.537905298 | Down | 0.016731956 | 0.955609729 |
| 6451      | SH3BGR | SH3 domain binding glutamate-rich protein like            | 8.38899 | 7.76771 | 7.71777 | 7.24389 | 6.87719 | 7.55091 | -1.663428667 | -0.73416     | 1.663428667 | Down | 0.029518603 | 0.955609729 |
| 9465      | AKAP7  | A-kinase anchoring protein 7                              | 7.95662 | 8.90638 | 8.30835 | 9.22236 | 9.05386 | 9.59779 | 1.867213202  | 0.900886667  | 1.867213202 | Up   | 0.016724219 | 0.955609729 |
| 10804     | GJB6   | Gap junction protein $\beta$ 6                            | 5.21204 | 6.49664 | 5.94119 | 7.19145 | 6.49512 | 6.93984 | 1.989188506  | 0.99218      | 1.989188506 | Up   | 0.028658985 | 0.955609729 |
| 1031      | CDKN2C | Cyclin-dependent kinase inhibitor 2C (p18, inhibits       | 7.335   | 5.50613 | 5.46994 | 4.25405 | 5.26275 | 4.89503 | -2.461856493 | -1.299746667 | 2.461856493 | Down | 0.049905827 | 0.955609729 |

|        |           |                                                           |         |         |         |         |         |         |              |              |             |      |             |             |
|--------|-----------|-----------------------------------------------------------|---------|---------|---------|---------|---------|---------|--------------|--------------|-------------|------|-------------|-------------|
| 1031   | CDKN2C    | Cyclin-dependent kinase inhibitor 2C (p18, inhibits CDK4) | 7.335   | 5.50613 | 5.46994 | 4.25405 | 5.26275 | 4.89503 | -2.461856493 | -1.299746667 | 2.461856493 | Down | 0.049905827 | 0.955609729 |
| 154761 | LOC154761 | Family with sequence similarity 115, member C pseudogene  | 5.92317 | 6.01918 | 6.42891 | 7.22699 | 7.08036 | 6.95274 | 1.949282696  | 0.962943333  | 1.949282696 | Up   | 0.00194573  | 0.955609729 |
| 7430   | EZR       | Ezrin                                                     | 7.69011 | 8.51457 | 8.94329 | 9.52088 | 9.08617 | 9.13489 | 1.820906275  | 0.864656667  | 1.820906275 | Up   | 0.037544454 | 0.955609729 |
| 9867   | PJA2      | Praja ring finger 2, E3 ubiquitin protein ligase          | 6.33444 | 6.25731 | 6.65296 | 6.19944 | 4.99889 | 5.60395 | -1.758253798 | -0.814143333 | 1.758253798 | Down | 0.038031693 | 0.955609729 |
| 64853  | AIDA      | Axin interactor, dorsalization associated                 | 6.40668 | 5.66146 | 5.9835  | 5.18312 | 4.90105 | 5.79867 | -1.650534544 | -0.722933333 | 1.650534544 | Down | 0.046277344 | 0.955609729 |
| 54346  | UNC93A    | Unc-93 homolog A (C. Elegans)                             | 2.87979 | 3.86279 | 4.02048 | 6.28794 | 4.93169 | 4.78257 | 3.355156356  | 1.74638      | 3.355156356 | Up   | 0.008516354 | 0.955609729 |
| 222584 | FAM83B    | Family with sequence similarity 83 member B               | 3.28266 | 3.80458 | 4.25625 | 4.37871 | 4.48636 | 4.56854 | 1.62080066   | 0.696706667  | 1.62080066  | Up   | 0.025064437 | 0.955609729 |
| 29785  | CYP2S1    | Cytochrome P450, family                                   | 6.97988 | 7.8761  | 7.00181 | 8.41673 | 9.00599 | 7.91493 | 2.234501996  | 1.159953333  | 2.234501996 | Up   | 0.016169285 | 0.955609729 |

|               |                      |                                                                       |             |             |             |             |             |             |                  |                  |                 |      |                 |                 |
|---------------|----------------------|-----------------------------------------------------------------------|-------------|-------------|-------------|-------------|-------------|-------------|------------------|------------------|-----------------|------|-----------------|-----------------|
| 388650        | FAM69<br>A           | Family with<br>sequence<br>similarity 69<br>member A                  | 7.053<br>22 | 6.211<br>36 | 6.344<br>14 | 6.026<br>16 | 5.335<br>03 | 5.850<br>03 | -1.7400957<br>18 | -0.79916<br>6667 | 1.740095<br>718 | Down | 0.030864<br>694 | 0.955609<br>729 |
| 10268         | RAMP<br>3            | Receptor (G<br>protein-coupled)<br>activity<br>modifying<br>protein 3 | 8.737<br>1  | 7.098<br>44 | 7.325<br>49 | 6.274<br>27 | 7.012<br>32 | 6.542<br>69 | -2.1593293<br>91 | -1.11058<br>3333 | 2.159329<br>391 | Down | 0.045755<br>439 | 0.955609<br>729 |
| 25987         | TSKU                 | Tsukushi,<br>small leucine<br>rich<br>proteoglycan                    | 8.583<br>19 | 8.216<br>82 | 8.852<br>66 | 7.782<br>1  | 8.332<br>42 | 7.763<br>3  | -1.5069344<br>54 | -0.59161<br>6667 | 1.506934<br>454 | Down | 0.049505<br>143 | 0.955609<br>729 |
| 54928         | IMPA<br>D1           | Inositol<br>monophosph<br>atase domain<br>containing 1                | 6.560<br>25 | 5.680<br>29 | 5.706<br>6  | 5.360<br>07 | 4.829<br>25 | 5.459<br>96 | -1.7004933<br>14 | -0.76595<br>3333 | 1.700493<br>314 | Down | 0.039821<br>347 | 0.955609<br>729 |
| 51409         | HEMK<br>1            | Hemk<br>methyltransf<br>erase family<br>member 1                      | 4.219<br>34 | 5.160<br>43 | 4.580<br>33 | 5.548<br>06 | 5.368<br>98 | 5.087       | 1.6035989        | 0.681313<br>333  | 1.603598<br>9   | Up   | 0.038378<br>038 | 0.955609<br>729 |
| 100287<br>413 | LOC10<br>028741<br>3 | Uncharacteri<br>zed<br>LOC100287<br>413                               | 3.603<br>13 | 4.559<br>84 | 4.164<br>31 | 4.684<br>19 | 4.962<br>7  | 4.556<br>9  | 1.5427489<br>72  | 0.625503<br>333  | 1.542748<br>972 | Up   | 0.046498<br>198 | 0.955609<br>729 |
| 4600          | MX2                  | MX<br>dynamin-like<br>gtpase 2                                        | 7.777<br>78 | 7.495<br>38 | 7.406<br>92 | 8.202<br>22 | 8.422<br>34 | 8.605<br>96 | 1.8026841<br>8   | 0.850146<br>667  | 1.802684<br>18  | Up   | 0.003140<br>963 | 0.955609<br>729 |
| 1797          | DXO                  | Decapping<br>exoribonucle<br>ase                                      | 7.898<br>44 | 7.853<br>6  | 8.260<br>59 | 6.287<br>2  | 7.482<br>87 | 6.369<br>53 | -2.4469930<br>43 | -1.29101         | 2.446993<br>043 | Down | 0.007928<br>414 | 0.955609<br>729 |



|           |          |                                                                        |          |          |          |          |          |          |              |              |             |      |             |             |
|-----------|----------|------------------------------------------------------------------------|----------|----------|----------|----------|----------|----------|--------------|--------------|-------------|------|-------------|-------------|
| 10580     | SORBS1   | Sorbin and SH3 domain containing 1                                     | 11.43304 | 9.59138  | 9.43059  | 7.5514   | 9.02264  | 8.35306  | -3.586649251 | -1.842636667 | 3.586649251 | Down | 0.020748544 | 0.955609729 |
| 7903      | ST8SI A4 | ST8 $\alpha$ -N-acetyl-n euraminide $\alpha$ -2,8-sialyltr ansferase 4 | 5.4135   | 6.18019  | 6.04885  | 4.08678  | 4.87149  | 5.49882  | -2.087558557 | -1.061816667 | 2.087558557 | Down | 0.030140968 | 0.955609729 |
| 64781     | CERK     | Ceramide kinase                                                        | 6.79889  | 6.99272  | 7.46089  | 7.92731  | 7.48885  | 7.71974  | 1.545206873  | 0.6278       | 1.545206873 | Up   | 0.030835743 | 0.955609729 |
| 57619     | SHRO OM3 | Shroom family member 3                                                 | 8.82903  | 10.08217 | 10.00326 | 10.92889 | 10.41346 | 10.32335 | 1.888289544  | 0.91708      | 1.888289544 | Up   | 0.044039197 | 0.955609729 |
| 80344     | DCAF11   | DDB1 and CUL4 associated factor 11                                     | 7.08556  | 7.58474  | 7.34787  | 8.05895  | 8.20885  | 8.02041  | 1.689597962  | 0.75668      | 1.689597962 | Up   | 0.005252604 | 0.955609729 |
| 775       | CACNA1C  | Calcium channel, voltage-depe ndent, L type, $\alpha$ 1C subunit       | 5.91138  | 5.29592  | 4.66298  | 4.13982  | 4.82306  | 4.20215  | -1.868330909 | -0.90175     | 1.868330909 | Down | 0.036606075 | 0.955609729 |
| 101059953 | NPIPA8   | Nuclear pore complex interacting protein family member A8              | 6.70725  | 7.99302  | 7.37651  | 8.22062  | 8.13039  | 8.1216   | 1.739424428  | 0.79861      | 1.739424428 | Up   | 0.043520998 | 0.955609729 |
| 4640      | MYO1A    | Myosin IA                                                              | 7.19453  | 8.31363  | 7.35728  | 8.45988  | 8.42083  | 8.25692  | 1.690437488  | 0.757396667  | 1.690437488 | Up   | 0.045524223 | 0.955609729 |

|        |         |                                                                     |         |         |         |         |         |         |              |              |             |      |             |             |
|--------|---------|---------------------------------------------------------------------|---------|---------|---------|---------|---------|---------|--------------|--------------|-------------|------|-------------|-------------|
| 3751   | KCND2   | Potassium channel, voltage gated Shal related subfamily D, member 2 | 4.72799 | 5.22287 | 5.26234 | 5.74621 | 5.70666 | 5.73736 | 1.578998718  | 0.65901      | 1.578998718 | Up   | 0.010009956 | 0.955609729 |
| 2634   | GBP2    | Guanylate binding protein 2, interferon-inducible                   | 7.14267 | 6.83939 | 6.80187 | 5.34228 | 6.141   | 6.68082 | -1.831818628 | -0.873276667 | 1.831818628 | Down | 0.03973173  | 0.955609729 |
| 645954 | SVILP1  | Supervillin pseudogene 1                                            | 6.53557 | 7.12427 | 6.83096 | 5.26317 | 6.09226 | 6.24846 | -1.948418158 | -0.962303333 | 1.948418158 | Down | 0.017044512 | 0.955609729 |
| 5504   | PPP1R2  | Protein phosphatase 1 regulatory inhibitor subunit 2                | 3.78894 | 3.36127 | 3.40949 | 4.59208 | 3.95219 | 3.87144 | 1.535459011  | 0.61867      | 1.535459011 | Up   | 0.029354265 | 0.955609729 |
| 84873  | ADGRG7  | Adhesion G protein-coupled receptor G7                              | 3.17857 | 4.23839 | 4.45469 | 5.21716 | 4.51365 | 5.00258 | 1.937120007  | 0.953913333  | 1.937120007 | Up   | 0.034708324 | 0.955609729 |
| 4629   | MYH11   | Myosin, heavy chain 11, smooth muscle                               | 5.83741 | 6.66909 | 6.70445 | 3.60782 | 5.76064 | 4.01513 | -3.843587024 | -1.942453333 | 3.843587024 | Down | 0.012253837 | 0.955609729 |
| 9068   | ANGPTL1 | Angiotensin-like 1                                                  | 6.75843 | 5.80568 | 5.42256 | 4.20536 | 4.5904  | 5.27873 | -2.469227904 | -1.30406     | 2.469227904 | Down | 0.016837705 | 0.955609729 |
| 8829   | NRP1    | Neuropilin 1                                                        | 6.05859 | 5.49522 | 6.06472 | 5.26693 | 4.97933 | 5.21682 | -1.645451306 | -0.718483333 | 1.645451306 | Down | 0.011375334 | 0.955609729 |

|               |                         |                                                                                          |             |             |             |             |             |             |                  |                  |                 |      |                 |                 |
|---------------|-------------------------|------------------------------------------------------------------------------------------|-------------|-------------|-------------|-------------|-------------|-------------|------------------|------------------|-----------------|------|-----------------|-----------------|
| 100529<br>240 | ZNF81<br>6-ZNF<br>321P  | ZNF816-ZN<br>F321P<br>readthrough                                                        | 5.425<br>65 | 6.603<br>86 | 6.313<br>97 | 7.304<br>41 | 7.404<br>59 | 6.637<br>12 | 2.0012203<br>11  | 1.00088          | 2.001220<br>311 | Up   | 0.028817<br>304 | 0.955609<br>729 |
| 23704         | KCNE<br>4               | Potassium<br>channel,<br>voltage gated<br>subfamily E<br>regulatory $\beta$<br>subunit 4 | 6.379<br>88 | 6.556<br>21 | 5.545<br>88 | 3.950<br>05 | 5.708<br>51 | 4.111<br>83 | -2.9701312<br>12 | -1.57052<br>6667 | 2.970131<br>212 | Down | 0.019386<br>476 | 0.955609<br>729 |
| 54854         | FAM83<br>E              | Family with<br>sequence<br>similarity 83<br>member E                                     | 6.153<br>88 | 7.187<br>96 | 7.469<br>18 | 8.206<br>34 | 7.517<br>87 | 7.810<br>32 | 1.8762299<br>65  | 0.907836<br>667  | 1.876229<br>965 | Up   | 0.047249<br>975 | 0.955609<br>729 |
| 6920          | TCEA3                   | Transcriptio<br>n elongation<br>factor A<br>(SII), 3                                     | 8.195<br>71 | 8.341<br>32 | 8.030<br>98 | 8.938<br>48 | 8.589<br>79 | 8.996<br>61 | 1.5716609<br>25  | 0.65229          | 1.571660<br>925 | Up   | 0.010315<br>413 | 0.955609<br>729 |
| 5144          | PDE4D                   | Phosphodiesterase 4D                                                                     | 4.463<br>53 | 4.523<br>96 | 4.733<br>49 | 3.219<br>7  | 4.229<br>95 | 4.136<br>25 | -1.6377252<br>35 | -0.71169<br>3333 | 1.637725<br>235 | Down | 0.038064        | 0.955609<br>729 |
| 9472          | AKAP<br>6               | A-kinase<br>anchoring<br>protein 6                                                       | 5.310<br>08 | 5.779<br>55 | 6.036<br>95 | 4.692<br>5  | 4.808<br>03 | 4.684<br>63 | -1.9731126<br>61 | -0.98047<br>3333 | 1.973112<br>661 | Down | 0.002526<br>939 | 0.955609<br>729 |
| 100526<br>832 | PHOSP<br>HO2-K<br>LHL23 | PHOSPHO2<br>-KLHL23<br>readthrough                                                       | 4.841<br>24 | 5.609<br>66 | 5.181<br>07 | 6.235<br>34 | 5.978<br>23 | 5.617<br>02 | 1.6619458        | 0.732873<br>333  | 1.661945<br>8   | Up   | 0.026046<br>052 | 0.955609<br>729 |
| 389376        | SFTA2                   | Surfactant<br>associated 2                                                               | 8.091<br>84 | 9.220<br>39 | 8.576<br>36 | 9.483<br>39 | 9.716<br>74 | 9.512<br>44 | 1.9202932<br>81  | 0.941326<br>667  | 1.920293<br>281 | Up   | 0.015911<br>406 | 0.955609<br>729 |
| 6541          | SLC7A<br>1              | Solute<br>carrier<br>family 7<br>(cationic                                               | 4.534<br>43 | 5.054<br>35 | 4.742<br>47 | 5.338<br>15 | 5.581<br>97 | 5.602<br>43 | 1.6591373<br>62  | 0.730433<br>333  | 1.659137<br>362 | Up   | 0.005637<br>524 | 0.955609<br>729 |

|        |         |                                                           |         |         |         |         |         |         |              |              |             |      |             |             |
|--------|---------|-----------------------------------------------------------|---------|---------|---------|---------|---------|---------|--------------|--------------|-------------|------|-------------|-------------|
|        |         | amino acid transporter, y <sup>+</sup> system), member 1  |         |         |         |         |         |         |              |              |             |      |             |             |
| 229    | ALDO B  | Aldolase, fructose-bisphosphate B                         | 4.79307 | 6.05438 | 4.76424 | 6.17425 | 5.89499 | 6.72964 | 2.088397978  | 1.062396667  | 2.088397978 | Up   | 0.035071901 | 0.955609729 |
| 3158   | HMGCS2  | 3-hydroxy-3-methylglutaryl-coa synthase 2 (mitochondrial) | 8.40162 | 7.09511 | 6.42248 | 8.74404 | 9.36646 | 9.09609 | 3.39276146   | 1.76246      | 3.39276146  | Up   | 0.009638285 | 0.955609729 |
| 3419   | IDH3A   | Isocitrate dehydrogenase 3 (NAD <sup>+</sup> ) $\alpha$   | 5.01243 | 4.34273 | 4.55457 | 4.20009 | 3.59901 | 3.91464 | -1.660936211 | -0.731996667 | 1.660936211 | Down | 0.015632015 | 0.955609729 |
| 54065  | SMIM11A | Small integral membrane protein 11A                       | 5.72511 | 5.87277 | 6.12979 | 7.16954 | 6.33185 | 6.63989 | 1.746584772  | 0.804536667  | 1.746584772 | Up   | 0.016401594 | 0.955609729 |
| 10136  | CELA3A  | Chymotrypsin like elastase family member 3A               | 3.34836 | 3.79293 | 3.34063 | 4.6902  | 4.41693 | 4.94855 | 2.283510357  | 1.191253333  | 2.283510357 | Up   | 0.000531616 | 0.955609729 |
| 23057  | NMNAT2  | Nicotinamide nucleotide adenylyltransferase 2             | 5.90012 | 5.73907 | 5.06125 | 4.38705 | 5.10312 | 4.24549 | -1.983790945 | -0.98826     | 1.983790945 | Down | 0.016489832 | 0.955609729 |
| 261729 | STEAP   | STEAP2                                                    | 6.486   | 6.892   | 7.210   | 7.383   | 7.78    | 7.243   | 1.5217063    | 0.60569      | 1.521706    | Up   | 0.047020    | 0.955609    |

|           |             |                                                 |         |         |         |         |         |         |              |              |             |      |             |             |
|-----------|-------------|-------------------------------------------------|---------|---------|---------|---------|---------|---------|--------------|--------------|-------------|------|-------------|-------------|
|           | 2           | metalloreductase                                | 05      | 58      | 52      | 11      |         | 11      | 68           |              | 368         |      | 49          | 729         |
| 64943     | NT5DC2      | 5'-nucleotidase domain containing 2             | 6.06526 | 4.87732 | 5.79045 | 4.02577 | 5.34011 | 4.22038 | -2.068985212 | -1.048923333 | 2.068985212 | Down | 0.04973934  | 0.955609729 |
| 5788      | PTPRC       | Protein tyrosine phosphatase, receptor type, C  | 6.92578 | 6.39915 | 6.74984 | 5.93716 | 5.8343  | 6.49854 | -1.517387965 | -0.60159     | 1.517387965 | Down | 0.044848857 | 0.955609729 |
| 6251      | RSU1        | Ras suppressor protein 1                        | 8.60448 | 7.66544 | 8.09434 | 7.1465  | 7.35079 | 7.62109 | -1.680192656 | -0.748626667 | 1.680192656 | Down | 0.031022993 | 0.955609729 |
| 144501    | KRT80       | Keratin 80, type II                             | 4.8351  | 5.41487 | 4.86976 | 6.19668 | 6.22749 | 5.13174 | 1.755716612  | 0.81206      | 1.755716612 | Up   | 0.04996586  | 0.955609729 |
| 100533990 | APOC4-APOC2 | APOC4-APOC2 readthrough (NMD candidate)         | 6.06565 | 6.58253 | 5.60903 | 6.71307 | 7.13457 | 7.14033 | 1.879375483  | 0.910253333  | 1.879375483 | Up   | 0.0153779   | 0.955609729 |
| 8618      | CADPS       | Ca <sup>++</sup> -dependent secretion activator | 6.13006 | 6.78967 | 6.54576 | 7.63299 | 7.90191 | 6.66909 | 1.882739414  | 0.912833333  | 1.882739414 | Up   | 0.038641807 | 0.955609729 |
| 552889    | ATXN7L3B    | Ataxin 7-like 3B                                | 4.78688 | 4.34721 | 4.91116 | 5.10219 | 5.41352 | 5.31492 | 1.510605209  | 0.595126667  | 1.510605209 | Up   | 0.018367039 | 0.955609729 |
| 8976      | WASL        | Wiskott-Aldrich syndrome-like                   | 7.08237 | 7.32989 | 7.26019 | 7.96468 | 8.02108 | 7.73409 | 1.604881378  | 0.682466667  | 1.604881378 | Up   | 0.005228809 | 0.955609729 |
| 4211      | MEIS1       | Meis                                            | 6.572   | 6.046   | 5.976   | 4.878   | 5.723   | 5.576   | -1.7478523   | -0.80558     | 1.747852    | Down | 0.026103    | 0.955609    |

|       |             |                                                                                  |             |             |             |              |             |             |                  |                  |                 |      |                 |                 |
|-------|-------------|----------------------------------------------------------------------------------|-------------|-------------|-------------|--------------|-------------|-------------|------------------|------------------|-----------------|------|-----------------|-----------------|
|       |             | homeobox 1                                                                       | 15          | 91          | 42          | 38           | 77          | 58          | 68               | 3333             | 368             |      | 116             | 729             |
| 84632 | AFAP1<br>L2 | Actin<br>filament<br>associated<br>protein 1 like<br>2                           | 4.995<br>59 | 3.763<br>6  | 4.004<br>04 | 3.274<br>11  | 3.457<br>42 | 3.657<br>08 | -1.7309211<br>43 | -0.79154         | 1.730921<br>143 | Down | 0.042915<br>374 | 0.955609<br>729 |
| 9871  | SEC24<br>D  | SEC24<br>homolog D,<br>COPII coat<br>complex<br>component                        | 3.452<br>95 | 3.645<br>72 | 4.329<br>45 | 4.758<br>44  | 4.124<br>13 | 4.892<br>44 | 1.7198665<br>99  | 0.782296<br>667  | 1.719866<br>599 | Up   | 0.033443<br>325 | 0.955609<br>729 |
| 2288  | FKBP4       | FK506<br>binding<br>protein 4                                                    | 9.003<br>31 | 9.843<br>81 | 9.566<br>47 | 10.14<br>486 | 10.12<br>91 | 10.21<br>02 | 1.6134959<br>99  | 0.69019          | 1.613495<br>999 | Up   | 0.022745<br>501 | 0.955609<br>729 |
| 4154  | MBNL<br>1   | Muscleblind<br>like splicing<br>regulator 1                                      | 4.340<br>22 | 4.337<br>77 | 5.133<br>46 | 4.041<br>02  | 3.204<br>07 | 3.926<br>35 | -1.8403795<br>53 | -0.88000<br>3333 | 1.840379<br>553 | Down | 0.024599<br>023 | 0.955609<br>729 |
| 54716 | SLC6A<br>20 | Solute<br>carrier<br>family 6<br>(proline<br>IMINO<br>transporter),<br>member 20 | 5.700<br>2  | 7.200<br>49 | 6.821<br>53 | 8.128<br>12  | 7.430<br>46 | 7.649<br>03 | 2.2373588<br>47  | 1.161796<br>667  | 2.237358<br>847 | Up   | 0.026291<br>346 | 0.955609<br>729 |
| 7412  | VCAM<br>1   | Vascular cell<br>adhesion<br>molecule 1                                          | 6.728<br>9  | 5.119<br>5  | 6.096<br>12 | 3.821<br>73  | 4.244<br>58 | 4.580<br>01 | -3.4012538<br>08 | -1.76606<br>6667 | 3.401253<br>808 | Down | 0.004367<br>906 | 0.955609<br>729 |
| 1910  | EDNR<br>B   | Endothelin<br>receptor type<br>B                                                 | 8.220<br>88 | 5.994       | 5.267<br>78 | 3.997<br>01  | 5.329<br>59 | 4.514<br>82 | -3.6818052<br>92 | -1.88041<br>3333 | 3.681805<br>292 | Down | 0.044524<br>281 | 0.955609<br>729 |
| 5627  | PROS1       | Protein S ( $\alpha$ )                                                           | 6.377       | 6.259       | 5.950       | 5.465        | 5.156       | 5.823       | -1.6403003       | -0.71396         | 1.640300        | Down | 0.016429        | 0.955609        |

|        |              |                                                                 |             |              |             |              |              |              |                  |                  |                 |      |                 |                 |
|--------|--------------|-----------------------------------------------------------------|-------------|--------------|-------------|--------------|--------------|--------------|------------------|------------------|-----------------|------|-----------------|-----------------|
|        |              |                                                                 | 24          | 78           | 85          | 56           | 75           | 68           | 43               |                  | 343             |      | 44              | 729             |
| 213    | ALB          | Albumin                                                         | 4.823<br>65 | 5.648<br>86  | 6.203<br>53 | 6.160<br>03  | 6.466<br>48  | 7.553<br>31  | 2.2468855<br>92  | 1.167926<br>667  | 2.246885<br>592 | Up   | 0.044086<br>126 | 0.955609<br>729 |
| 399948 | COLC<br>A1   | Colorectal<br>cancer<br>associated 1                            | 6.744<br>72 | 7.220<br>02  | 7.350<br>65 | 7.968<br>27  | 7.524<br>33  | 7.635<br>14  | 1.5200477<br>73  | 0.604116<br>667  | 1.520047<br>773 | Up   | 0.033460<br>807 | 0.955609<br>729 |
| 28970  | C11orf<br>54 | Chromosom<br>e 11 open<br>reading<br>frame 54                   | 8.921<br>73 | 10.13<br>882 | 9.524<br>63 | 10.71<br>504 | 10.04<br>148 | 10.32<br>633 | 1.7808384<br>74  | 0.832556<br>667  | 1.780838<br>474 | Up   | 0.045053<br>532 | 0.955609<br>729 |
| 65124  | SOWA<br>HC   | Sosondowah<br>ankyrin<br>repeat<br>domain<br>family<br>member C | 6.612<br>08 | 6.871<br>54  | 7.119<br>12 | 7.919<br>49  | 7.353<br>67  | 7.629<br>85  | 1.7014404<br>6   | 0.766756<br>667  | 1.701440<br>46  | Up   | 0.011351<br>346 | 0.955609<br>729 |
| 79822  | ARHG<br>AP28 | Rho gtpase<br>activating<br>protein 28                          | 6.544<br>85 | 5.417<br>91  | 5.565<br>56 | 4.207<br>75  | 5.439<br>7   | 4.806<br>68  | -2.0345785<br>78 | -1.02473         | 2.034578<br>578 | Down | 0.042059<br>113 | 0.955609<br>729 |
| 338    | APOB         | Apolipoprote<br>in B                                            | 4.861<br>06 | 5.690<br>68  | 4.779<br>37 | 6.815<br>8   | 7.866<br>62  | 6.467<br>47  | 3.8359750<br>41  | 1.939593<br>333  | 3.835975<br>041 | Up   | 0.002723<br>894 | 0.955609<br>729 |
| 79817  | MOB3<br>B    | MOB kinase<br>activator 3B                                      | 7.250<br>18 | 7.888<br>54  | 7.785<br>76 | 8.602<br>27  | 7.908<br>01  | 8.570<br>43  | 1.6457478<br>73  | 0.718743<br>333  | 1.645747<br>873 | Up   | 0.034899<br>863 | 0.955609<br>729 |
| 10117  | ENAM         | Enamelin                                                        | 5.405<br>97 | 6.322<br>74  | 6.310<br>12 | 7.166<br>97  | 6.561<br>99  | 7.002<br>14  | 1.8627361<br>46  | 0.897423<br>333  | 1.862736<br>146 | Up   | 0.023611<br>637 | 0.955609<br>729 |
| 59     | ACTA<br>2    | Actin, $\alpha$ 2,<br>smooth<br>muscle, aorta                   | 5.149<br>98 | 4.789<br>71  | 4.425<br>32 | 3.472<br>35  | 4.482<br>76  | 3.710<br>24  | -1.8659193<br>97 | -0.89988<br>6667 | 1.865919<br>397 | Down | 0.022338<br>089 | 0.955609<br>729 |
| 3371   | TNC          | Tenascin C                                                      | 4.986<br>54 | 3.973<br>07  | 4.983<br>09 | 2.320<br>94  | 3.876<br>27  | 2.739<br>14  | -3.1794634<br>7  | -1.66878<br>3333 | 3.179463<br>47  | Down | 0.008527<br>761 | 0.955609<br>729 |
| 122786 | FRMD         | FERM                                                            | 8.176       | 5.834        | 6.215       | 4.544        | 5.896        | 5.011        | -3.0134998       | -1.59144         | 3.013499        | Down | 0.046906        | 0.955609        |

|           |                      |                                                        |         |         |         |          |          |          |              |             |             |      |             |             |
|-----------|----------------------|--------------------------------------------------------|---------|---------|---------|----------|----------|----------|--------------|-------------|-------------|------|-------------|-------------|
|           | 6                    | domain containing 6                                    | 18      | 77      | 13      | 29       |          | 47       | 65           |             | 865         |      | 059         | 729         |
| 1582      | CYP8B1               | Cytochrome P450, family 8, subfamily B, polypeptide 1  | 4.57636 | 5.09878 | 4.68478 | 5.16793  | 5.93633  | 6.78776  | 2.261635865  | 1.177366667 | 2.261635865 | Up   | 0.02358585  | 0.955609729 |
| 100861540 | CYP3A7-CYP3A51P3A51P | CYP3A7-CYP3A51P readthrough                            | 3.08086 | 3.18838 | 4.07637 | 4.47363  | 5.45531  | 4.1554   | 2.372229079  | 1.246243333 | 2.372229079 | Up   | 0.018122813 | 0.955609729 |
| 4494      | MT1F                 | Metallothionein 1F                                     | 8.83203 | 10.4129 | 9.43204 | 11.54488 | 11.15157 | 11.40958 | 3.505661422  | 1.809686667 | 3.505661422 | Up   | 0.002675451 | 0.955609729 |
| 8727      | CTNNAL1              | Catenin $\alpha$ -like 1                               | 8.87657 | 7.39041 | 6.92086 | 5.93111  | 5.74465  | 6.43131  | -3.234606019 | -1.69359    | 3.234606019 | Down | 0.012900981 | 0.955609729 |
| 126789    | PUSL1                | Pseudouridylate synthase-like 1                        | 5.48041 | 5.82395 | 6.10997 | 6.59933  | 6.59426  | 6.21905  | 1.586781336  | 0.666103333 | 1.586781336 | Up   | 0.020465187 | 0.955609729 |
| 9229      | DLGAP1               | Discs, large (Drosophila) homolog-associated protein 1 | 4.99257 | 6.08767 | 5.74986 | 6.55438  | 6.47989  | 6.46364  | 1.852238659  | 0.88927     | 1.852238659 | Up   | 0.0183949   | 0.955609729 |
| 285382    | C3orf70              | Chromosome 3 open reading frame 70                     | 7.47    | 6.49864 | 6.74308 | 3.99252  | 6.68833  | 5.24101  | -3.024339291 | -1.59662    | 3.024339291 | Down | 0.047422292 | 0.955609729 |
| 54825     | CDHR2                | Cadherin related family                                | 5.74073 | 7.71201 | 7.0885  | 8.11601  | 8.21717  | 7.7985   | 2.292327754  | 1.196813333 | 2.292327754 | Up   | 0.043676312 | 0.955609729 |



|        |         |                                                 |          |          |          |          |         |         |              |              |             |      |             |             |
|--------|---------|-------------------------------------------------|----------|----------|----------|----------|---------|---------|--------------|--------------|-------------|------|-------------|-------------|
| 54825  | CDHR2   | Cadherin related family member 2                | 5.74073  | 7.71201  | 7.0885   | 8.11601  | 8.21717 | 7.7985  | 2.292327754  | 1.196813333  | 2.292327754 | Up   | 0.043676312 | 0.955609729 |
| 54498  | SMOX    | Spermine oxidase                                | 6.53356  | 7.99814  | 7.67351  | 9.06609  | 8.3249  | 8.11017 | 2.141542042  | 1.09865      | 2.141542042 | Up   | 0.040722496 | 0.955609729 |
| 9648   | GCC2    | GRIP and coiled-coil domain containing 2        | 6.56655  | 7.14435  | 6.68362  | 7.91139  | 7.3413  | 7.18272 | 1.602469243  | 0.680296667  | 1.602469243 | Up   | 0.036687559 | 0.955609729 |
| 27333  | GOLIM4  | Golgi integral membrane protein 4               | 6.91552  | 7.00355  | 6.67159  | 7.79589  | 8.11783 | 7.5562  | 1.944977321  | 0.959753333  | 1.944977321 | Up   | 0.002557055 | 0.955609729 |
| 7757   | ZNF208  | Zinc finger protein 208                         | 5.58708  | 4.74426  | 3.87978  | 3.37796  | 3.50657 | 3.80283 | -2.257282004 | -1.174586667 | 2.257282004 | Down | 0.024381804 | 0.955609729 |
| 4281   | MID1    | Midline 1                                       | 5.53705  | 4.59528  | 4.80372  | 4.10734  | 4.58478 | 3.45949 | -1.902829988 | -0.928146667 | 1.902829988 | Down | 0.035158125 | 0.955609729 |
| 694    | BTG1    | B-cell translocation gene 1, anti-proliferative | 10.75788 | 10.92352 | 10.49335 | 10.13102 | 9.66688 | 9.70615 | -1.85347587  | -0.890233333 | 1.85347587  | Down | 0.003288077 | 0.955609729 |
| 5358   | PLS3    | Plastin 3                                       | 8.13826  | 7.47382  | 7.74666  | 7.00467  | 6.82451 | 7.42075 | -1.627814909 | -0.702936667 | 1.627814909 | Down | 0.026267159 | 0.955609729 |
| 171024 | SYNP O2 | Synaptopodin 2                                  | 9.30532  | 10.2311  | 10.66314 | 6.25942  | 9.62862 | 7.34002 | -5.006607415 | -2.323833333 | 5.006607415 | Down | 0.02923086  | 0.955609729 |
| 5292   | PIM1    | Pim-1 proto-oncogene, serine/threon             | 5.09268  | 4.08359  | 4.45469  | 4.04252  | 3.76066 | 3.8084  | -1.594524944 | -0.673126667 | 1.594524944 | Down | 0.036346202 | 0.955609729 |

|           |             |                                                           |         |         |         |         |         |         |              |              |             |      |             |             |
|-----------|-------------|-----------------------------------------------------------|---------|---------|---------|---------|---------|---------|--------------|--------------|-------------|------|-------------|-------------|
| 3925      | STMN1       | Stathmin 1                                                | 7.28851 | 6.83858 | 6.33928 | 5.33479 | 6.43487 | 5.97194 | -1.876776256 | -0.908256667 | 1.876776256 | Down | 0.038954622 | 0.955609729 |
| 4493      | MT1E        | Metallothionein 1E                                        | 7.41296 | 7.67425 | 7.46962 | 8.43864 | 7.89771 | 8.49072 | 1.68967604   | 0.756746667  | 1.68967604  | Up   | 0.010063473 | 0.955609729 |
| 3117      | HLA-DQA1    | Major histocompatibility complex, class II, DQ $\alpha$ 1 | 8.63461 | 8.6741  | 8.66085 | 7.22608 | 8.02513 | 8.17977 | -1.797751151 | -0.846193333 | 1.797751151 | Down | 0.017216186 | 0.955609729 |
| 5908      | RAP1B       | RAP1B, member of RAS oncogene family                      | 5.51884 | 4.59482 | 4.58076 | 4.40312 | 3.56146 | 4.28574 | -1.758932354 | -0.8147      | 1.758932354 | Down | 0.045776334 | 0.955609729 |
| 100528007 | BORCS7-ASMT | BORCS7-A SMT readthrough (NMD candidate)                  | 6.28628 | 7.49762 | 7.16565 | 7.76461 | 7.75724 | 8.67592 | 2.118054923  | 1.08274      | 2.118054923 | Up   | 0.029555523 | 0.955609729 |
| 6461      | SHB         | Src homology 2 domain containing adaptor protein B        | 6.5591  | 7.39475 | 7.45992 | 7.9279  | 7.88223 | 7.89316 | 1.697219704  | 0.763173333  | 1.697219704 | Up   | 0.025259518 | 0.955609729 |
| 7453      | WARS        | Tryptophanyl-tRNA synthetase                              | 5.64626 | 4.64709 | 5.03573 | 4.02369 | 4.03239 | 4.56688 | -1.868706505 | -0.90204     | 1.868706505 | Down | 0.017348087 | 0.955609729 |
| 92292     | GLYA TL1    | Glycine-N-acyltransferase                                 | 3.60313 | 4.55984 | 4.16431 | 4.68419 | 4.9627  | 4.5569  | 1.542748972  | 0.625503333  | 1.542748972 | Up   | 0.046498198 | 0.955609729 |

|        |        |                                                                                       |         |         |         |          |         |         |              |              |             |      |             |             |
|--------|--------|---------------------------------------------------------------------------------------|---------|---------|---------|----------|---------|---------|--------------|--------------|-------------|------|-------------|-------------|
|        |        | e like 1                                                                              |         |         |         |          |         |         |              |              |             |      |             |             |
| 89870  | TRIM15 | Tripartite motif containing 15                                                        | 6.606   | 7.65115 | 7.56353 | 8.31648  | 8.36566 | 7.68806 | 1.802301033  | 0.84984      | 1.802301033 | Up   | 0.042727297 | 0.955609729 |
| 3352   | HTR1D  | 5-hydroxytryptamine (serotonin) receptor 1D, G protein-coupled                        | 6.19062 | 7.46799 | 6.26147 | 7.88426  | 7.24648 | 8.00617 | 2.102749025  | 1.072276667  | 2.102749025 | Up   | 0.03154499  | 0.955609729 |
| 115123 | MARCH3 | Membrane associated ring-CH-type finger 3                                             | 7.38116 | 7.73124 | 7.691   | 8.62761  | 7.87731 | 8.41379 | 1.630261428  | 0.705103333  | 1.630261428 | Up   | 0.022648668 | 0.955609729 |
| 1439   | CSF2RB | Colony stimulating factor 2 receptor, $\beta$ , low-affinity (granulocyte-macrophage) | 7.19561 | 5.66866 | 7.2859  | 5.00949  | 6.01663 | 5.4832  | -2.319183005 | -1.213616667 | 2.319183005 | Down | 0.042292783 | 0.955609729 |
| 57194  | ATP10A | Atpase, class V, type 10A                                                             | 5.69622 | 5.30231 | 5.03026 | 6.19472  | 6.24875 | 6.07518 | 1.777627861  | 0.829953333  | 1.777627861 | Up   | 0.005393778 | 0.955609729 |
| 4496   | MT1H   | Metallothionein 1H                                                                    | 7.73298 | 8.5811  | 7.99435 | 10.33029 | 9.48095 | 9.95369 | 3.527957872  | 1.818833333  | 3.527957872 | Up   | 0.000668336 | 0.955609729 |
| 8934   | RAB29  | RAB29, member RAS                                                                     | 4.69341 | 4.8012  | 5.03573 | 6.13394  | 4.93555 | 5.69065 | 1.673961871  | 0.743266667  | 1.673961871 | Up   | 0.048330077 | 0.955609729 |

|        |          |                                                                     |         |         |         |         |         |         |              |              |             |      |             |             |
|--------|----------|---------------------------------------------------------------------|---------|---------|---------|---------|---------|---------|--------------|--------------|-------------|------|-------------|-------------|
|        |          | oncogene family                                                     |         |         |         |         |         |         |              |              |             |      |             |             |
| 335    | APOA1    | Apolipoprotein A-I                                                  | 6.97141 | 6.9621  | 6.20648 | 8.39757 | 6.87819 | 8.38574 | 2.256108837  | 1.173836667  | 2.256108837 | Up   | 0.039407813 | 0.955609729 |
| 1047   | CLGN     | Calmegin                                                            | 3.40735 | 4.58114 | 2.98759 | 4.2951  | 4.70776 | 5.94924 | 2.505919378  | 1.32534      | 2.505919378 | Up   | 0.046316283 | 0.955609729 |
| 3320   | HSP90AA1 | Heat shock protein 90kDa $\alpha$ family class A member 1           | 8.85783 | 9.10029 | 8.77658 | 9.79438 | 9.32918 | 9.95485 | 1.718603415  | 0.781236667  | 1.718603415 | Up   | 0.00869977  | 0.955609729 |
| 6555   | SLC10A2  | Solute carrier family 10 (sodium/bile acid cotransporter), member 2 | 5.83725 | 5.89259 | 6.34618 | 8.15236 | 7.90423 | 7.71668 | 3.729761379  | 1.899083333  | 3.729761379 | Up   | 5.99474E-05 | 0.955609729 |
| 1266   | CNN3     | Calponin 3, acidic                                                  | 9.48192 | 8.54215 | 8.65831 | 7.3953  | 7.57153 | 8.35739 | -2.172545914 | -1.119386667 | 2.172545914 | Down | 0.016684025 | 0.955609729 |
| 151230 | KLHL23   | Kelch like family member 23                                         | 4.84124 | 5.60966 | 5.18107 | 6.23534 | 5.97823 | 5.61702 | 1.6619458    | 0.732873333  | 1.6619458   | Up   | 0.026046052 | 0.955609729 |
| 55273  | TMEM100  | Transmembrane protein 100                                           | 9.22438 | 7.19173 | 6.98225 | 6.01739 | 6.43213 | 6.56985 | -2.75044172  | -1.459663333 | 2.75044172  | Down | 0.043054911 | 0.955609729 |
| 444    | ASPH     | Aspartate $\beta$ -hydroxylase                                      | 7.33426 | 5.4384  | 5.72774 | 4.8779  | 4.5936  | 5.32266 | -2.354487941 | -1.235413333 | 2.354487941 | Down | 0.045174305 | 0.955609729 |
| 9444   | QKI      | QKI, KH domain                                                      | 5.49132 | 4.15041 | 4.39853 | 3.52799 | 3.62563 | 4.19177 | -1.86385548  | -0.89829     | 1.86385548  | Down | 0.04745479  | 0.955609729 |

|        |            |                                                |             |              |              |              |              |              |                  |                  |                 |      |                 |                 |
|--------|------------|------------------------------------------------|-------------|--------------|--------------|--------------|--------------|--------------|------------------|------------------|-----------------|------|-----------------|-----------------|
|        |            | containing,<br>RNA<br>binding                  |             |              |              |              |              |              |                  |                  |                 |      |                 |                 |
| 27295  | PDLIM<br>3 | PDZ and<br>LIM domain<br>3                     | 7.914<br>63 | 6.132<br>17  | 6.340<br>39  | 3.199<br>79  | 5.987<br>57  | 4.173<br>67  | -5.0702375<br>2  | -2.34205<br>3333 | 5.070237<br>52  | Down | 0.020907<br>861 | 0.955609<br>729 |
| 26298  | EHF        | Ets<br>homologous<br>factor                    | 3.829<br>34 | 4.719<br>21  | 5.077<br>3   | 5.564<br>64  | 6.094<br>19  | 5.183<br>36  | 2.1025109<br>78  | 1.072113<br>333  | 2.102510<br>978 | Up   | 0.025065<br>598 | 0.955609<br>729 |
| 4883   | NPR3       | Natriuretic<br>peptide<br>receptor 3           | 9.541<br>68 | 6.759<br>57  | 6.879<br>62  | 5.828<br>01  | 6.132<br>19  | 5.666<br>02  | -3.6088770<br>67 | -1.85155         | 3.608877<br>067 | Down | 0.039376<br>744 | 0.955609<br>729 |
| 8548   | BLZF1      | Basic leucine<br>zipper<br>nuclear<br>factor 1 | 3.958<br>21 | 4.506<br>05  | 4.739<br>05  | 5.558<br>79  | 4.737<br>61  | 5.000<br>08  | 1.6219432<br>4   | 0.697723<br>333  | 1.621943<br>24  | Up   | 0.044769<br>964 | 0.955609<br>729 |
| 81831  | NETO2      | Neuropilin<br>and tolloid<br>like 2            | 3.691<br>21 | 5.325<br>51  | 5.275<br>6   | 5.933<br>11  | 5.844<br>95  | 6.454<br>98  | 2.4855641<br>41  | 1.313573<br>333  | 2.485564<br>141 | Up   | 0.025580<br>429 | 0.955609<br>729 |
| 284422 | SMIM2<br>4 | Small<br>integral<br>membrane<br>protein 24    | 9.247<br>57 | 11.08<br>461 | 10.91<br>024 | 11.57<br>432 | 11.38<br>128 | 11.94<br>046 | 2.3260466        | 1.21788          | 2.326046<br>6   | Up   | 0.042574<br>392 | 0.955609<br>729 |
| 10313  | RTN3       | Reticulon 3                                    | 6.985<br>91 | 6.454<br>09  | 6.734<br>09  | 5.954<br>53  | 5.020<br>73  | 6.408<br>51  | -1.9054168<br>69 | -0.93010<br>6667 | 1.905416<br>869 | Down | 0.039956<br>667 | 0.955609<br>729 |
| 9663   | LPIN2      | Lipin 2                                        | 7.767<br>56 | 8.562<br>79  | 7.763<br>31  | 9.461<br>6   | 8.549<br>08  | 8.900<br>42  | 1.9173937<br>92  | 0.939146<br>667  | 1.917393<br>792 | Up   | 0.023915<br>043 | 0.955609<br>729 |
| 4969   | OGN        | Osteoglycin                                    | 7.948<br>49 | 7.012<br>26  | 6.081<br>25  | 4.508<br>49  | 6.069<br>74  | 5.840<br>91  | -2.9098672<br>41 | -1.54095<br>3333 | 2.909867<br>241 | Down | 0.033885<br>405 | 0.955609<br>729 |
| 10217  | CTDSP<br>L | CTD small<br>phosphatase                       | 8.998<br>64 | 9.844<br>43  | 9.583<br>73  | 10.08<br>076 | 10.09<br>425 | 10.09<br>637 | 1.5314093<br>81  | 0.61486          | 1.531409<br>381 | Up   | 0.036340<br>61  | 0.955609<br>729 |

|           |           |                                       |         |         |         |         |         |         |              |              |             |      |             |             |
|-----------|-----------|---------------------------------------|---------|---------|---------|---------|---------|---------|--------------|--------------|-------------|------|-------------|-------------|
|           |           | like                                  |         |         |         |         |         |         |              |              |             |      |             |             |
| 23464     | GCAT      | Glycine C-acetyltransferase           | 5.90865 | 6.86708 | 6.90652 | 7.29571 | 7.3161  | 7.36659 | 1.699821592  | 0.765383333  | 1.699821592 | Up   | 0.035050258 | 0.955609729 |
| 273       | AMPH      | Amphiphysin                           | 5.43441 | 4.6922  | 4.81779 | 3.60198 | 4.81687 | 4.0505  | -1.771555504 | -0.825016667 | 1.771555504 | Down | 0.049552571 | 0.955609729 |
| 4134      | MAP4      | Microtubule associated protein 4      | 7.67193 | 7.03014 | 6.86864 | 6.66843 | 6.51883 | 6.61042 | -1.506300907 | -0.59101     | 1.506300907 | Down | 0.0446616   | 0.955609729 |
| 100529145 | TEN1-CDK3 | TEN1-CDK3 readthrough (NMD candidate) | 6.63976 | 6.40313 | 6.80187 | 7.40334 | 7.13034 | 7.3433  | 1.599262397  | 0.677406667  | 1.599262397 | Up   | 0.007672476 | 0.955609729 |
| 284266    | SIGLEC15  | Sialic acid binding Ig-like lectin 15 | 5.30928 | 5.47839 | 5.42684 | 6.39152 | 6.22749 | 6.08286 | 1.776601359  | 0.82912      | 1.776601359 | Up   | 0.001321031 | 0.955609729 |
| 65268     | WNK2      | WNK lysine deficient protein kinase 2 | 6.47908 | 7.40952 | 6.98506 | 7.58772 | 7.65476 | 7.55789 | 1.560746972  | 0.642236667  | 1.560746972 | Up   | 0.040389934 | 0.955609729 |
| 51715     | RAB23     | RAB23, member RAS oncogene family     | 6.09658 | 5.36572 | 5.59266 | 4.89661 | 4.96242 | 4.92441 | -1.690175824 | -0.757173333 | 1.690175824 | Down | 0.009456278 | 0.955609729 |
| 7429      | VIL1      | Villin 1                              | 5.64118 | 6.43558 | 6.86837 | 7.42078 | 7.17696 | 6.95448 | 1.826434479  | 0.86903      | 1.826434479 | Up   | 0.034886375 | 0.955609729 |
| 283420    | CLEC9A    | C-type lectin domain                  | 3.78697 | 3.72959 | 3.48126 | 4.5633  | 4.10856 | 4.51958 | 1.660026954  | 0.731206667  | 1.660026954 | Up   | 0.003290467 | 0.955609729 |

|        |              |                                                           |             |             |             |             |             |             |                  |                  |                 |      |                 |                 |
|--------|--------------|-----------------------------------------------------------|-------------|-------------|-------------|-------------|-------------|-------------|------------------|------------------|-----------------|------|-----------------|-----------------|
|        |              | family 9,<br>member A                                     |             |             |             |             |             |             |                  |                  |                 |      |                 |                 |
| 91862  | MARV<br>ELD3 | MARVEL<br>domain<br>containing 3                          | 6.047<br>48 | 7.066<br>24 | 6.610<br>87 | 7.933<br>1  | 7.364<br>23 | 7.084<br>29 | 1.8476310<br>12  | 0.885676<br>667  | 1.847631<br>012 | Up   | 0.033194<br>506 | 0.955609<br>729 |
| 90634  | N4BP2<br>L1  | NEDD4<br>binding<br>protein<br>2-like 1                   | 4.537<br>63 | 4.498<br>16 | 4.202<br>77 | 3.626<br>96 | 3.893<br>94 | 3.836<br>09 | -1.5445536<br>67 | -0.62719         | 1.544553<br>667 | Down | 0.003385<br>286 | 0.955609<br>729 |
| 2042   | EPHA3        | EPH<br>receptor A3                                        | 7.517<br>83 | 6.258<br>4  | 5.784<br>12 | 3.715<br>65 | 5.544<br>08 | 5.142<br>61 | -3.2928497<br>09 | -1.71933<br>6667 | 3.292849<br>709 | Down | 0.025744<br>169 | 0.955609<br>729 |
| 256714 | MAP7<br>D2   | MAP7<br>domain<br>containing 2                            | 3.618<br>8  | 4.350<br>22 | 4.093<br>44 | 4.960<br>26 | 5.619<br>34 | 4.261<br>86 | 1.9004398<br>1   | 0.926333<br>333  | 1.900439<br>81  | Up   | 0.039067<br>128 | 0.955609<br>729 |
| 9987   | HNRN<br>PDL  | Heterogeneo<br>us nuclear<br>ribonucleopr<br>otein D like | 8.360<br>81 | 7.684<br>81 | 7.833<br>15 | 7.295<br>18 | 6.539<br>32 | 7.441<br>72 | -1.8245196<br>22 | -0.86751<br>6667 | 1.824519<br>622 | Down | 0.025742<br>011 | 0.955609<br>729 |
| 55041  | PLEK<br>HB2  | Pleckstrin<br>homology<br>domain<br>containing<br>B2      | 5.434<br>72 | 6.491<br>24 | 6.748<br>91 | 7.585<br>45 | 7.205<br>65 | 7.456<br>08 | 2.2827454<br>61  | 1.19077          | 2.282745<br>461 | Up   | 0.012703<br>987 | 0.955609<br>729 |
| 387628 | KGFLP<br>1   | Fibroblast<br>growth<br>factor 7<br>pseudogene            | 7.501<br>29 | 6.879<br>49 | 6.730<br>08 | 6.461<br>41 | 6.494<br>25 | 5.843<br>14 | -1.7060816<br>19 | -0.77068<br>6667 | 1.706081<br>619 | Down | 0.031197<br>641 | 0.955609<br>729 |
| 3400   | ID4          | Inhibitor of<br>DNA<br>binding 4,<br>dominant             | 8.807<br>58 | 5.528<br>84 | 5.671<br>61 | 4.646<br>58 | 5.053<br>73 | 4.107<br>74 | -4.1891571<br>33 | -2.06666         | 4.189157<br>133 | Down | 0.049912<br>802 | 0.955609<br>729 |

|       |         |                                                         |         |          |          |          |          |          |              |              |             |      |             |             |
|-------|---------|---------------------------------------------------------|---------|----------|----------|----------|----------|----------|--------------|--------------|-------------|------|-------------|-------------|
|       |         | negative helix-loop-helix protein                       |         |          |          |          |          |          |              |              |             |      |             |             |
| 3122  | HLA-DRA | Major histocompatibility complex, class II, DR $\alpha$ | 8.63461 | 8.6741   | 8.66085  | 7.22608  | 8.02513  | 8.17977  | -1.797751151 | -0.846193333 | 1.797751151 | Down | 0.017216186 | 0.955609729 |
| 2161  | F12     | Coagulation factor XII (Hageman factor)                 | 6.59693 | 7.37518  | 6.98281  | 8.06115  | 7.64434  | 7.57151  | 1.710035964  | 0.774026667  | 1.710035964 | Up   | 0.019707828 | 0.955609729 |
| 901   | CCNG2   | Cyclin G2                                               | 5.936   | 5.11646  | 5.45727  | 4.68819  | 4.48633  | 5.26278  | -1.61418955  | -0.69081     | 1.61418955  | Down | 0.04776699  | 0.955609729 |
| 55784 | MCTP2   | Multiple C2 domains, transmembrane 2                    | 5.76443 | 7.31804  | 6.90942  | 7.97569  | 7.53406  | 7.65329  | 2.080672642  | 1.05705      | 2.080672642 | Up   | 0.034838884 | 0.955609729 |
| 7102  | TSPAN7  | Tetraspanin 7                                           | 6.11751 | 4.86213  | 4.7495   | 3.94264  | 4.14826  | 4.55768  | -2.03757524  | -1.026853333 | 2.03757524  | Down | 0.033268171 | 0.955609729 |
| 79413 | ZBED2   | Zinc finger, BED-type containing 2                      | 4.32272 | 4.96886  | 4.70157  | 5.40985  | 5.41216  | 5.36419  | 1.659808346  | 0.731016667  | 1.659808346 | Up   | 0.006738927 | 0.955609729 |
| 90865 | IL33    | Interleukin 33                                          | 5.85407 | 3.90977  | 4.15754  | 2.72944  | 3.24722  | 3.74665  | -2.637839282 | -1.399356667 | 2.637839282 | Down | 0.035561786 | 0.955609729 |
| 55450 | CAMK2N1 | Calcium/calmodulin-dependent protein kinase II          | 9.83153 | 10.83764 | 10.23282 | 11.18096 | 10.82031 | 11.10972 | 1.66593641   | 0.736333333  | 1.66593641  | Up   | 0.03257193  | 0.955609729 |



|       |         |                                                            |          |          |          |          |          |          |              |              |             |      |             |             |
|-------|---------|------------------------------------------------------------|----------|----------|----------|----------|----------|----------|--------------|--------------|-------------|------|-------------|-------------|
| 55450 | CAMK2N1 | Calcium/calmodulin-dependent protein kinase II inhibitor 1 | 9.83153  | 10.83764 | 10.23282 | 11.18096 | 10.82031 | 11.10972 | 1.66593641   | 0.736333333  | 1.66593641  | Up   | 0.03257193  | 0.955609729 |
| 1018  | CDK3    | Cyclin-dependent kinase 3                                  | 6.63976  | 6.40313  | 6.80187  | 7.40334  | 7.13034  | 7.3433   | 1.599262397  | 0.677406667  | 1.599262397 | Up   | 0.007672476 | 0.955609729 |
| 23022 | PALLD   | Palladin, cytoskeletal associated protein                  | 10.36386 | 9.16236  | 9.0045   | 7.52131  | 9.16487  | 8.11978  | -2.364584448 | -1.241586667 | 2.364584448 | Down | 0.049168125 | 0.955609729 |
| 79774 | GRTP1   | Growth hormone regulated TBC protein 1                     | 5.15916  | 6.75515  | 6.20185  | 6.96595  | 7.03063  | 7.5069   | 2.187232624  | 1.129106667  | 2.187232624 | Up   | 0.029869274 | 0.955609729 |
| 831   | CAST    | Calpastatin                                                | 9.67553  | 9.10686  | 8.94728  | 8.69017  | 8.00877  | 8.82276  | -1.665539997 | -0.73599     | 1.665539997 | Down | 0.042477257 | 0.955609729 |
| 8611  | PLPP1   | Phospholipid phosphatase 1                                 | 9.51019  | 8.80525  | 8.10187  | 7.65097  | 7.95667  | 7.79307  | -2.007685558 | -1.005533333 | 2.007685558 | Down | 0.025541685 | 0.955609729 |
| 10232 | MSLN    | Mesothelin                                                 | 9.47593  | 6.9558   | 7.19685  | 10.13834 | 10.0208  | 8.98636  | 3.577553479  | 1.838973333  | 3.577553479 | Up   | 0.034944882 | 0.955609729 |
| 24146 | CLDN15  | Claudin 15                                                 | 5.57032  | 5.36361  | 5.58241  | 7.51988  | 5.86847  | 6.27714  | 2.070123253  | 1.049716667  | 2.070123253 | Up   | 0.039747936 | 0.955609729 |
| 960   | CD44    | CD44 molecule (Indian blood group)                         | 5.90322  | 5.76373  | 6.29182  | 5.50703  | 5.08705  | 5.38059  | -1.581580147 | -0.661366667 | 1.581580147 | Down | 0.015412803 | 0.955609729 |

|        |          |                                                        |         |         |         |          |         |          |              |              |             |      |             |             |
|--------|----------|--------------------------------------------------------|---------|---------|---------|----------|---------|----------|--------------|--------------|-------------|------|-------------|-------------|
| 58191  | CXCL16   | Chemokine (C-X-C motif) ligand 16                      | 8.5307  | 8.92471 | 8.51165 | 9.40414  | 9.35496 | 9.16623  | 1.572169391  | 0.652756667  | 1.572169391 | Up   | 0.009609179 | 0.955609729 |
| 10979  | FERMT2   | Fermitin family member 2                               | 7.08202 | 5.54418 | 5.80108 | 4.84471  | 5.00181 | 5.3101   | -2.129065006 | -1.09022     | 2.129065006 | Down | 0.032458353 | 0.955609729 |
| 154007 | SNRN P48 | Small nuclear ribonucleoprotein, U11/U12 48kda subunit | 4.50275 | 4.72342 | 5.24548 | 5.69659  | 5.07438 | 5.57799  | 1.543034159  | 0.62577      | 1.543034159 | Up   | 0.046651672 | 0.955609729 |
| 57509  | MTUS1    | Microtubule associated tumor suppressor 1              | 6.81485 | 7.5859  | 7.64793 | 8.42746  | 7.94742 | 8.14757  | 1.771031657  | 0.82459      | 1.771031657 | Up   | 0.020633161 | 0.955609729 |
| 80150  | ASRGL1   | Asparaginase like 1                                    | 9.17727 | 9.19058 | 9.22682 | 10.60856 | 10.3277 | 9.97986  | 2.154196717  | 1.10715      | 2.154196717 | Up   | 0.000883755 | 0.955609729 |
| 4311   | MME      | Membrane metallo-endopeptidase                         | 8.59514 | 9.22906 | 8.52204 | 10.55378 | 9.6229  | 10.24121 | 2.561904445  | 1.357216667  | 2.561904445 | Up   | 0.003374993 | 0.955609729 |
| 3988   | LIPA     | Lipase A, lysosomal acid, cholesterol esterase         | 7.01883 | 6.89773 | 7.20705 | 6.42277  | 5.78027 | 6.04418  | -1.943688013 | -0.958796667 | 1.943688013 | Down | 0.003194425 | 0.955609729 |
| 51733  | UPB1     | Ureidopropionase, $\beta$                              | 4.54121 | 4.39138 | 4.94531 | 5.52047  | 5.18343 | 5.70352  | 1.793991846  | 0.843173333  | 1.793991846 | Up   | 0.005872869 | 0.955609729 |
| 9371   | KIF3B    | Kinesin                                                | 7.623   | 8.201   | 8.205   | 8.917    | 8.470   | 8.640    | 1.5867446    | 0.66607      | 1.586744    | Up   | 0.023786    | 0.955609    |

|               |                           |                                                                           |             |             |             |             |             |             |                  |                  |                 |      |                 |                 |
|---------------|---------------------------|---------------------------------------------------------------------------|-------------|-------------|-------------|-------------|-------------|-------------|------------------|------------------|-----------------|------|-----------------|-----------------|
| 9371          | KIF3B                     | Kinesin family member 3B                                                  | 7.623<br>37 | 8.201<br>39 | 8.205<br>43 | 8.917<br>22 | 8.470<br>72 | 8.640<br>46 | 1.5867446<br>74  | 0.66607          | 1.586744<br>674 | Up   | 0.023786<br>834 | 0.955609<br>729 |
| 8728          | ADAM19                    | ADAM metalloproteinase domain 19                                          | 6.429<br>27 | 5.627<br>76 | 6.392       | 4.408<br>41 | 6.053<br>29 | 4.651<br>51 | -2.1613609<br>14 | -1.11194         | 2.161360<br>914 | Down | 0.049548<br>801 | 0.955609<br>729 |
| 84188         | FAR1                      | Fatty acyl coa reductase 1                                                | 6.691<br>18 | 5.924<br>54 | 5.986<br>78 | 5.401<br>72 | 5.558<br>66 | 5.346<br>48 | -1.6996213<br>05 | -0.76521<br>3333 | 1.699621<br>305 | Down | 0.015904<br>096 | 0.955609<br>729 |
| 115361        | GBP4                      | Guanylate binding protein 4                                               | 6.777<br>56 | 5.395<br>78 | 5.714<br>63 | 4.865<br>99 | 4.796<br>68 | 5.367<br>57 | -1.9353260<br>83 | -0.95257<br>6667 | 1.935326<br>083 | Down | 0.040318<br>578 | 0.955609<br>729 |
| 100534<br>612 | C1QTNF3-A<br>MACR<br>MACR | C1QTNF3-A MACR readthrough (NMD candidate)                                | 7.961<br>53 | 9.408<br>53 | 8.903<br>88 | 9.617<br>34 | 9.639<br>86 | 9.589<br>88 | 1.8121637<br>6   | 0.857713<br>333  | 1.812163<br>76  | Up   | 0.048433<br>898 | 0.955609<br>729 |
| 9153          | SLC28A2                   | Solute carrier family 28 (concentrative nucleoside transporter), member 2 | 5.457<br>74 | 5.839<br>87 | 7.906<br>53 | 9.638<br>86 | 9.223<br>74 | 9.326<br>84 | 7.9728747<br>21  | 2.9951           | 7.972874<br>721 | Up   | 0.002038<br>587 | 0.955609<br>729 |
| 79745         | CLIP4                     | CAP-Gly domain containing linker protein family                           | 8.937<br>96 | 7.745<br>64 | 8.126<br>06 | 6.705<br>82 | 7.641<br>67 | 7.406<br>04 | -2.0261064<br>86 | -1.01871         | 2.026106<br>486 | Down | 0.031683<br>245 | 0.955609<br>729 |

|        |         |                                                       |         |         |         |          |          |          |              |              |             |      |             |             |
|--------|---------|-------------------------------------------------------|---------|---------|---------|----------|----------|----------|--------------|--------------|-------------|------|-------------|-------------|
| 9200   | HACD1   | 3-hydroxyacyl-coa dehydratase 1                       | 6.34814 | 5.87887 | 4.89686 | 3.62604  | 4.94907  | 4.29919  | -2.669414486 | -1.416523333 | 2.669414486 | Down | 0.018851811 | 0.955609729 |
| 9991   | PTBP3   | Polypyrimidine tract binding protein 3                | 4.56037 | 4.62599 | 5.01886 | 5.62979  | 5.37559  | 4.96209  | 1.502553819  | 0.587416667  | 1.502553819 | Up   | 0.034847798 | 0.955609729 |
| 783    | CACNB2  | Calcium channel, voltage-dependent, $\beta$ 2 subunit | 5.6053  | 4.84878 | 4.53991 | 3.52934  | 4.53991  | 4.12344  | -1.910256894 | -0.933766667 | 1.910256894 | Down | 0.033874121 | 0.955609729 |
| 2069   | EREG    | Epiregulin                                            | 4.22136 | 5.4679  | 6.33406 | 7.94664  | 5.9565   | 6.92028  | 3.031503175  | 1.600033333  | 3.031503175 | Up   | 0.048716806 | 0.955609729 |
| 91614  | DEPD C7 | DEP domain containing 7                               | 5.44738 | 6.5976  | 5.57358 | 6.68665  | 6.56373  | 6.89035  | 1.790947856  | 0.840723333  | 1.790947856 | Up   | 0.036863027 | 0.955609729 |
| 83483  | PLVAP   | Plasmalemma vesicle associated protein                | 7.26471 | 6.56459 | 6.66133 | 5.3127   | 6.2259   | 5.97592  | -1.988990888 | -0.992036667 | 1.988990888 | Down | 0.014904685 | 0.955609729 |
| 10283  | CWC27   | CWC27 spliceosome-associated protein homolog          | 8.87771 | 8.6658  | 8.67641 | 9.8716   | 9.25135  | 9.12794  | 1.598800579  | 0.67699      | 1.598800579 | Up   | 0.023353347 | 0.955609729 |
| 112483 | SAT2    | Spermidine/spermine N1-acetyltransferase family       | 9.77554 | 9.77563 | 9.4965  | 10.60044 | 10.46772 | 10.00371 | 1.596301686  | 0.674733333  | 1.596301686 | Up   | 0.01447265  | 0.955609729 |

|        |         |                                                                                                                  |         |         |          |          |          |          |              |             |             |      |             |             |
|--------|---------|------------------------------------------------------------------------------------------------------------------|---------|---------|----------|----------|----------|----------|--------------|-------------|-------------|------|-------------|-------------|
| 112483 | SAT2    | Spermidine/spermine N1-acetyltransferase family member 2                                                         | 9.77554 | 9.77563 | 9.4965   | 10.60044 | 10.46772 | 10.00371 | 1.596301686  | 0.674733333 | 1.596301686 | Up   | 0.01447265  | 0.955609729 |
| 5579   | PRKC B  | Protein kinase C, beta                                                                                           | 4.52963 | 3.70943 | 4.6101   | 3.32303  | 3.75504  | 3.74051  | -1.598656519 | -0.67686    | 1.598656519 | Down | 0.039406601 | 0.955609729 |
| 54910  | SEMA 4C | Sema domain, immunoglobulin domain (Ig), transmembrane domain (TM) and short cytoplasmic domain, (semaphorin) 4C | 6.17627 | 5.7108  | 6.09631  | 5.00842  | 5.70249  | 5.34353  | -1.561551337 | -0.64298    | 1.561551337 | Down | 0.029360494 | 0.955609729 |
| 3669   | ISG20   | Interferon stimulated exonuclease gene 20kda                                                                     | 9.89465 | 10.9159 | 10.35688 | 11.42304 | 11.18711 | 11.32669 | 1.896233552  | 0.923136667 | 1.896233552 | Up   | 0.011372522 | 0.955609729 |
| 54751  | FBLIM 1 | Filamin binding LIM protein 1                                                                                    | 7.11302 | 7.71231 | 8.12969  | 9.03992  | 8.71773  | 8.37141  | 2.082062438  | 1.058013333 | 2.082062438 | Up   | 0.011592833 | 0.955609729 |
| 54876  | DCAF1 6 | DDB1 and CUL4                                                                                                    | 4.94915 | 5.59187 | 5.77391  | 6.00597  | 6.02544  | 6.16352  | 1.543993487  | 0.626666667 | 1.543993487 | Up   | 0.035675016 | 0.955609729 |

|        |         |                                                           |         |         |         |         |         |         |              |              |             |      |             |             |
|--------|---------|-----------------------------------------------------------|---------|---------|---------|---------|---------|---------|--------------|--------------|-------------|------|-------------|-------------|
| 87     | ACTN1   | Actinin, $\alpha$ 1                                       | 6.30263 | 6.43514 | 7.00857 | 5.64454 | 6.18351 | 5.81875 | -1.624332145 | -0.699846667 | 1.624332145 | Down | 0.028020762 | 0.955609729 |
| 1515   | CTSV    | Cathepsin V                                               | 3.11098 | 3.70432 | 3.31236 | 3.70264 | 4.70021 | 4.29364 | 1.810360067  | 0.856276667  | 1.810360067 | Up   | 0.018438263 | 0.955609729 |
| 10808  | HSPH1   | Heat shock protein family H (Hsp110) member 1             | 5.6348  | 6.3467  | 6.44808 | 7.15221 | 6.61315 | 7.03989 | 1.731341118  | 0.79189      | 1.731341118 | Up   | 0.024717048 | 0.955609729 |
| 388561 | ZNF761  | Zinc finger protein 761                                   | 7.48324 | 7.59802 | 7.23701 | 9.35014 | 8.26379 | 9.61666 | 3.111132847  | 1.63744      | 3.111132847 | Up   | 0.002949854 | 0.955609729 |
| 283375 | SLC39A5 | Solute carrier family 39 (zinc transporter), member 5     | 6.9773  | 8.50973 | 7.70754 | 9.18697 | 8.619   | 8.55574 | 2.078745778  | 1.055713333  | 2.078745778 | Up   | 0.035433404 | 0.955609729 |
| 132014 | IL17RE  | Interleukin 17 receptor E                                 | 3.61724 | 4.25089 | 3.76501 | 4.57933 | 4.23799 | 4.6434  | 1.525406057  | 0.609193333  | 1.525406057 | Up   | 0.02105628  | 0.955609729 |
| 9510   | ADAMTS1 | ADAM metalloproteinase with thrombospondin type 1 motif 1 | 7.95325 | 5.55287 | 5.53765 | 4.66797 | 4.97428 | 4.53493 | -3.078434061 | -1.622196667 | 3.078434061 | Down | 0.041174971 | 0.955609729 |
| 51776  | ZAK     | Sterile $\alpha$ motif and leucine zipper containing      | 5.1138  | 5.03814 | 4.4627  | 5.46296 | 5.55817 | 5.54173 | 1.568522981  | 0.649406667  | 1.568522981 | Up   | 0.01615754  | 0.955609729 |

|       |             |                                                                         |             |             |             |             |             |             |                  |                  |                 |      |                 |                 |
|-------|-------------|-------------------------------------------------------------------------|-------------|-------------|-------------|-------------|-------------|-------------|------------------|------------------|-----------------|------|-----------------|-----------------|
|       |             | kinase AZK                                                              |             |             |             |             |             |             |                  |                  |                 |      |                 |                 |
| 1075  | CTSC        | Cathepsin C                                                             | 8.109<br>42 | 7.948<br>94 | 8.067<br>15 | 7.459<br>45 | 7.261<br>44 | 7.427<br>72 | -1.5789512<br>91 | -0.65896<br>6667 | 1.578951<br>291 | Down | 0.004113<br>548 | 0.955609<br>729 |
| 10107 | TRIM1<br>0  | Tripartite<br>motif<br>containing<br>10                                 | 4.512<br>76 | 5.801<br>95 | 5.462<br>39 | 6.107<br>07 | 6.279<br>85 | 5.841<br>16 | 1.7617306<br>07  | 0.816993<br>333  | 1.761730<br>607 | Up   | 0.049699<br>8   | 0.955609<br>729 |
| 6999  | TDO2        | Tryptophan<br>2,3-dioxygen<br>ase                                       | 4.170<br>86 | 4.757<br>85 | 4.765<br>42 | 5.585<br>57 | 4.867<br>51 | 5.983<br>45 | 1.8844366<br>99  | 0.914133<br>333  | 1.884436<br>699 | Up   | 0.025320<br>086 | 0.955609<br>729 |
| 51110 | LACT<br>B2  | Lactamase $\beta$<br>2                                                  | 7.102<br>02 | 8.056<br>39 | 7.850<br>14 | 8.415<br>64 | 8.259<br>06 | 8.284<br>41 | 1.5693712<br>4   | 0.650186<br>667  | 1.569371<br>24  | Up   | 0.047271<br>719 | 0.955609<br>729 |
| 9189  | ZBED1       | Zinc finger,<br>BED-type<br>containing 1                                | 7.255<br>4  | 7.920<br>9  | 7.954<br>21 | 8.648<br>06 | 8.251<br>22 | 8.168<br>03 | 1.5643897<br>62  | 0.6456           | 1.564389<br>762 | Up   | 0.039701<br>84  | 0.955609<br>729 |
| 6319  | SCD         | Stearoyl-coa<br>desaturase<br>( $\Delta$ -9-desatur<br>ase)             | 5.387<br>35 | 4.412<br>05 | 5.370<br>92 | 4.230<br>87 | 4.441<br>83 | 4.220<br>38 | -1.6924110<br>38 | -0.75908         | 1.692411<br>038 | Down | 0.031149<br>526 | 0.955609<br>729 |
| 9737  | GPRA<br>SP1 | G<br>protein-cou<br>pled receptor<br>associated<br>sorting<br>protein 1 | 7.279<br>09 | 6.871<br>27 | 7.000<br>41 | 6.413<br>41 | 6.773<br>86 | 6.149<br>4  | -1.5206625<br>07 | -0.6047          | 1.520662<br>507 | Down | 0.029974<br>192 | 0.955609<br>729 |
| 2021  | ENDO<br>G   | Endonucleas<br>e G                                                      | 7.351<br>29 | 7.120<br>32 | 7.422<br>89 | 8.463<br>01 | 8.085<br>56 | 7.925<br>18 | 1.8147238<br>16  | 0.85975          | 1.814723<br>816 | Up   | 0.004077<br>129 | 0.955609<br>729 |
| 79083 | MLPH        | Melanophili<br>n                                                        | 4.424<br>84 | 5.286<br>47 | 5.110<br>43 | 5.814<br>14 | 5.457<br>69 | 5.622<br>09 | 1.6140963<br>13  | 0.690726<br>667  | 1.614096<br>313 | Up   | 0.030413<br>566 | 0.955609<br>729 |
| 7424  | VEGF<br>C   | Vascular<br>endothelial                                                 | 8.443<br>95 | 6.331<br>63 | 6.683<br>81 | 4.407<br>04 | 6.289<br>82 | 5.601<br>59 | -3.2950796<br>37 | -1.72031<br>3333 | 3.295079<br>637 | Down | 0.039863<br>59  | 0.955609<br>729 |

|        |         | growth factor C                                                                   |         |         |         |         |         |         |              |              |             |      |             |             |
|--------|---------|-----------------------------------------------------------------------------------|---------|---------|---------|---------|---------|---------|--------------|--------------|-------------|------|-------------|-------------|
| 1282   | COL4A1  | Collagen, type IV, alpha 1                                                        | 9.21658 | 7.45046 | 6.8631  | 4.48193 | 7.22899 | 5.43663 | -4.369687171 | -2.12753     | 4.369687171 | Down | 0.040896127 | 0.955609729 |
| 1579   | CYP4A11 | Cytochrome P450, family 4, subfamily A, polypeptide 11                            | 5.45954 | 5.58935 | 5.11509 | 5.71262 | 6.00958 | 6.20921 | 1.504353203  | 0.589143333  | 1.504353203 | Up   | 0.025398123 | 0.955609729 |
| 3672   | ITGA1   | Integrin $\alpha$ 1                                                               | 5.072   | 4.20139 | 4.13246 | 3.43023 | 4.07249 | 3.65824 | -1.679808376 | -0.748296667 | 1.679808376 | Down | 0.038929191 | 0.955609729 |
| 339044 | PKD1P1  | Polycystic kidney disease 1 (autosomal dominant) pseudogene 1                     | 6.70725 | 7.99302 | 7.37651 | 8.22062 | 8.13039 | 8.1216  | 1.739424428  | 0.79861      | 1.739424428 | Up   | 0.043520998 | 0.955609729 |
| 6549   | SLC9A2  | Solute carrier family 9, subfamily A (NHE2, cation proton antiporter 2), member 2 | 5.58032 | 6.68358 | 6.0664  | 8.88287 | 7.9624  | 8.49842 | 5.05529985   | 2.337796667  | 5.05529985  | Up   | 0.000359415 | 0.955609729 |
| 1317   | SLC31A1 | Solute carrier family 31                                                          | 5.49621 | 5.97224 | 6.59787 | 6.83115 | 6.67585 | 6.71292 | 1.644748123  | 0.717866667  | 1.644748123 | Up   | 0.042163337 | 0.955609729 |



|       |             |                                                         |              |              |              |             |              |             |                  |                  |                 |      |                 |                 |
|-------|-------------|---------------------------------------------------------|--------------|--------------|--------------|-------------|--------------|-------------|------------------|------------------|-----------------|------|-----------------|-----------------|
| 1317  | SLC31<br>A1 | Solute carrier family 31 (copper transporter), member 1 | 5.496<br>21  | 5.972<br>24  | 6.597<br>87  | 6.831<br>15 | 6.675<br>85  | 6.712<br>92 | 1.6447481<br>23  | 0.717866<br>667  | 1.644748<br>123 | Up   | 0.042163<br>337 | 0.955609<br>729 |
| 6876  | TAGLN       | Transgelin                                              | 11.46<br>194 | 11.54<br>252 | 10.94<br>393 | 7.748<br>05 | 11.35<br>478 | 8.658<br>98 | -4.1762073<br>19 | -2.06219<br>3333 | 4.176207<br>319 | Down | 0.049402<br>704 | 0.955609<br>729 |
| 5350  | PLN         | Phospholamban                                           | 8.677<br>77  | 8.748<br>01  | 7.737<br>61  | 4.560<br>24 | 8.083<br>21  | 5.559<br>56 | -4.9937606<br>22 | -2.32012<br>6667 | 4.993760<br>622 | Down | 0.032346<br>597 | 0.955609<br>729 |
| 4162  | MCAM        | Melanoma cell adhesion molecule                         | 7.409<br>52  | 5.917<br>22  | 5.897<br>12  | 4.601<br>73 | 5.759<br>46  | 5.107<br>85 | -2.3810644<br>42 | -1.25160<br>6667 | 2.381064<br>442 | Down | 0.038087<br>963 | 0.955609<br>729 |
| 10157 | AASS        | Aminoaldehyde synthase                                  | 7.864<br>31  | 8.590<br>14  | 7.568<br>87  | 9.070<br>61 | 9.126<br>61  | 8.293<br>21 | 1.7683085<br>12  | 0.82237          | 1.768308<br>512 | Up   | 0.049677<br>955 | 0.955609<br>729 |
| 54899 | PXK         | PX domain containing serine/threonine kinase            | 5.532<br>47  | 4.776<br>92  | 5.129<br>03  | 4.450<br>72 | 4.376<br>32  | 4.764<br>75 | -1.5321349<br>06 | -0.61554<br>3333 | 1.532134<br>906 | Down | 0.030277<br>4   | 0.955609<br>729 |
| 4857  | NOVA1       | Neuro-oncological ventral antigen 1                     | 7.503<br>35  | 7.123<br>38  | 7.492<br>87  | 7.165<br>63 | 6.577<br>78  | 5.943<br>9  | -1.7541393<br>16 | -0.81076<br>3333 | 1.754139<br>316 | Down | 0.041834<br>676 | 0.955609<br>729 |
| 2823  | GPM6A       | Glycoprotein M6A                                        | 6.584<br>22  | 6.421<br>13  | 5.772<br>64  | 2.876<br>81 | 5.680<br>28  | 3.985<br>32 | -4.2237565<br>03 | -2.07852<br>6667 | 4.223756<br>503 | Down | 0.018467<br>772 | 0.955609<br>729 |
| 51386 | EIF3L       | Eukaryotic translation initiation factor 3 subunit L    | 9.195<br>61  | 8.753<br>92  | 8.783<br>06  | 8.272<br>37 | 7.867<br>69  | 8.629<br>28 | -1.5739794<br>08 | -0.65441<br>6667 | 1.573979<br>408 | Down | 0.034093<br>693 | 0.955609<br>729 |

|        |            |                                                       |             |             |             |             |             |             |                  |                  |                 |      |                 |                 |
|--------|------------|-------------------------------------------------------|-------------|-------------|-------------|-------------|-------------|-------------|------------------|------------------|-----------------|------|-----------------|-----------------|
| 8828   | NRP2       | Neuropilin 2                                          | 7.667<br>94 | 7.247<br>47 | 7.062<br>65 | 6.085<br>46 | 7.002<br>08 | 6.332<br>29 | -1.8059317<br>02 | -0.85274<br>3333 | 1.805931<br>702 | Down | 0.023039<br>001 | 0.955609<br>729 |
| 129807 | NEU4       | Neuraminidase 4 (sialidase)                           | 7.283<br>99 | 7.686<br>02 | 7.402<br>39 | 7.938<br>84 | 8.144<br>85 | 8.228<br>49 | 1.5654672<br>57  | 0.646593<br>333  | 1.565467<br>257 | Up   | 0.010037<br>926 | 0.955609<br>729 |
| 51752  | ERAP1      | Endoplasmic reticulum aminopeptidase 1                | 8.206<br>96 | 8.536<br>25 | 9.122<br>15 | 7.142<br>51 | 7.133<br>85 | 8.258<br>24 | -2.1588355<br>25 | -1.11025<br>3333 | 2.158835<br>525 | Down | 0.024150<br>95  | 0.955609<br>729 |
| 6925   | TCF4       | Transcription factor 4                                | 6.410<br>23 | 6.001<br>01 | 5.857<br>24 | 4.587<br>08 | 5.421<br>12 | 5.702<br>93 | -1.8055645<br>52 | -0.85245         | 1.805564<br>552 | Down | 0.033096<br>312 | 0.955609<br>729 |
| 7364   | UGT2<br>B7 | UDP glucuronosyl transferase 2 family, polypeptide B7 | 7.139<br>53 | 7.374<br>11 | 7.885<br>89 | 9.209<br>44 | 10.18<br>83 | 7.714<br>92 | 2.9711950<br>84  | 1.571043<br>333  | 2.971195<br>084 | Up   | 0.035730<br>027 | 0.955609<br>729 |
| 196743 | PAOX       | Polyamine oxidase (exo-N4-amino)                      | 6.805<br>67 | 7.071<br>09 | 6.544<br>44 | 7.732<br>37 | 7.798<br>3  | 7.224<br>93 | 1.7149105<br>57  | 0.778133<br>333  | 1.714910<br>557 | Up   | 0.013039<br>365 | 0.955609<br>729 |
| 23158  | TBC1D9     | TBC1 domain family member 9                           | 5.792<br>5  | 5.705<br>46 | 5.909<br>24 | 5.306<br>12 | 5.040<br>18 | 5.095<br>29 | -1.5748378<br>95 | -0.65520<br>3333 | 1.574837<br>895 | Down | 0.003847<br>688 | 0.955609<br>729 |
| 3685   | ITGAV      | Integrin $\alpha$ V                                   | 5.371<br>91 | 5.709<br>33 | 6.051<br>36 | 5.117<br>45 | 3.605<br>32 | 5.036<br>44 | -2.1802043<br>02 | -1.12446<br>3333 | 2.180204<br>302 | Down | 0.035352<br>522 | 0.955609<br>729 |
| 112616 | CMTM7      | CKLF-like MARVEL transmembrane domain                 | 7.775<br>98 | 7.921<br>77 | 8.248<br>32 | 8.618<br>4  | 8.567<br>06 | 8.598<br>67 | 1.5291041<br>42  | 0.612686<br>667  | 1.529104<br>142 | Up   | 0.011568<br>619 | 0.955609<br>729 |

|        |         |                                                                     |         |         |          |          |          |          |              |              |             |      |             |             |
|--------|---------|---------------------------------------------------------------------|---------|---------|----------|----------|----------|----------|--------------|--------------|-------------|------|-------------|-------------|
|        |         | containing 7                                                        |         |         |          |          |          |          |              |              |             |      |             |             |
| 91624  | NEXN    | Nexilin (F actin binding protein)                                   | 6.88083 | 5.36262 | 4.59067  | 2.88557  | 4.48491  | 3.22068  | -4.230964752 | -2.080986667 | 4.230964752 | Down | 0.016231828 | 0.955609729 |
| 653190 | ABCC6P1 | ATP binding cassette subfamily C member 6 pseudogene 1 (functional) | 4.35516 | 5.21993 | 4.47124  | 5.41079  | 5.63747  | 5.14654  | 1.642799788  | 0.716156667  | 1.642799788 | Up   | 0.032292529 | 0.955609729 |
| 64240  | ABCG5   | ATP binding cassette subfamily G member 5                           | 6.73366 | 7.82054 | 6.89366  | 8.77716  | 8.00535  | 8.71229  | 2.547319637  | 1.34898      | 2.547319637 | Up   | 0.007255036 | 0.955609729 |
| 262    | AMD1    | Adenosylmethionine decarboxylase 1                                  | 9.34269 | 9.94217 | 10.35214 | 10.92224 | 10.74427 | 10.23574 | 1.687729076  | 0.755083333  | 1.687729076 | Up   | 0.044921994 | 0.955609729 |
| 65997  | RASL11B | RAS-like, family 11, member B                                       | 4.04259 | 4.64854 | 3.8462   | 3.41515  | 3.73771  | 3.32493  | -1.609389286 | -0.686513333 | 1.609389286 | Down | 0.021151406 | 0.955609729 |
| 5209   | PFKFB3  | 6-phosphofructo-2-kinase/fructose-2,6-biphosphatase 3               | 5.1711  | 4.40925 | 5.09269  | 4.43444  | 3.87235  | 3.68129  | -1.859592699 | -0.894986667 | 1.859592699 | Down | 0.015450602 | 0.955609729 |
| 10352  | WARS2   | Tryptophanyl tRNA synthetase 2, mitochondria                        | 7.16869 | 6.74533 | 7.00684  | 6.43564  | 6.30023  | 6.1404   | -1.60383975  | -0.68153     | 1.60383975  | Down | 0.008095487 | 0.955609729 |

|        |          |                                                        |              |             |             |              |              |              |                  |                  |                 |      |                 |                 |
|--------|----------|--------------------------------------------------------|--------------|-------------|-------------|--------------|--------------|--------------|------------------|------------------|-----------------|------|-----------------|-----------------|
|        |          | l                                                      |              |             |             |              |              |              |                  |                  |                 |      |                 |                 |
| 5552   | SRGN     | Serglycin                                              | 9.958<br>74  | 7.291<br>54 | 8.480<br>66 | 6.636<br>61  | 7.023<br>93  | 7.130<br>84  | -3.1307753<br>69 | -1.64652         | 3.130775<br>369 | Down | 0.035079<br>479 | 0.955609<br>729 |
| 2006   | ELN      | Elastin                                                | 10.82<br>073 | 8.830<br>98 | 8.315<br>11 | 6.679<br>06  | 8.482<br>44  | 7.504<br>11  | -3.4036200<br>59 | -1.76707         | 3.403620<br>059 | Down | 0.047553<br>553 | 0.955609<br>729 |
| 350    | APOH     | Apolipoprotein H<br>( $\beta$ -2-glycoprotein I)       | 5.177<br>47  | 6.057<br>71 | 6.066<br>36 | 6.187<br>02  | 6.674<br>02  | 7.133<br>97  | 1.8632526<br>78  | 0.897823<br>333  | 1.863252<br>678 | Up   | 0.035236<br>703 | 0.955609<br>729 |
| 145226 | RDH12    | Retinol dehydrogenase 12<br>(all-trans/9-cis/11-cis)   | 8.075<br>78  | 9.355<br>89 | 9.616<br>25 | 10.17<br>235 | 10.26<br>934 | 10.31<br>421 | 2.3554346<br>95  | 1.235993<br>333  | 2.355434<br>695 | Up   | 0.017432<br>716 | 0.955609<br>729 |
| 957    | ENTPD5   | Ectonucleoside triphosphate diphosphohydrolase 5       | 5.599<br>22  | 6.725<br>75 | 6.285<br>99 | 6.751<br>2   | 7.476<br>57  | 6.882<br>58  | 1.7815463<br>28  | 0.83313          | 1.781546<br>328 | Up   | 0.044764<br>204 | 0.955609<br>729 |
| 10018  | BCL2L11  | BCL2-like 11 (apoptosis facilitator)                   | 5.694<br>97  | 5.799<br>12 | 5.351<br>76 | 4.889<br>94  | 4.598<br>31  | 5.338<br>35  | -1.5944770<br>51 | -0.67308<br>3333 | 1.594477<br>051 | Down | 0.024882<br>166 | 0.955609<br>729 |
| 3003   | GZMK     | Granzyme K                                             | 6.774<br>45  | 5.032<br>87 | 6.207<br>38 | 4.112<br>03  | 5.336<br>09  | 4.477<br>67  | -2.5721414<br>8  | -1.36297         | 2.572141<br>48  | Down | 0.031495<br>779 | 0.955609<br>729 |
| 7029   | TFDP2    | Transcription factor Dp-2 (E2F dimerization partner 2) | 5.679<br>86  | 6.782<br>64 | 7.494<br>44 | 7.644<br>31  | 7.711<br>51  | 7.752<br>52  | 2.0711997<br>08  | 1.050466<br>667  | 2.071199<br>708 | Up   | 0.047464<br>801 | 0.955609<br>729 |
| 347732 | CATSPER3 | Cation channel,                                        | 3.954<br>27  | 4.702<br>6  | 4.119<br>16 | 5.501<br>3   | 4.680<br>57  | 4.888<br>67  | 1.6991776<br>17  | 0.764836<br>667  | 1.699177<br>617 | Up   | 0.031485<br>865 | 0.955609<br>729 |

|        |              |                                                                                   |             |             |             |             |             |             |                  |                  |                 |      |                 |                 |
|--------|--------------|-----------------------------------------------------------------------------------|-------------|-------------|-------------|-------------|-------------|-------------|------------------|------------------|-----------------|------|-----------------|-----------------|
|        |              | sperm associated 3                                                                |             |             |             |             |             |             |                  |                  |                 |      |                 |                 |
| 6480   | ST6GA<br>L1  | ST6<br>β-galactosam<br>ide<br>α-2,6-sialyltr<br>anferase 1                        | 7.286<br>7  | 6.004<br>08 | 6.803<br>6  | 5.385<br>28 | 5.322<br>71 | 6.256<br>06 | -2.0611411<br>89 | -1.04344<br>3333 | 2.061141<br>189 | Down | 0.035412<br>216 | 0.955609<br>729 |
| 202915 | TMEM<br>184A | Transmembr<br>ane protein<br>184A                                                 | 5.369<br>82 | 7.082<br>59 | 6.408<br>87 | 7.126<br>29 | 7.321<br>25 | 7.392<br>67 | 1.9902872<br>54  | 0.992976<br>667  | 1.990287<br>254 | Up   | 0.049854<br>804 | 0.955609<br>729 |
| 9724   | UTP14<br>C   | UTP14, U3<br>small<br>nucleolar<br>ribonucleopr<br>otein,<br>homolog C<br>(yeast) | 5.886<br>54 | 6.079<br>45 | 6.235<br>95 | 6.877<br>3  | 6.767<br>74 | 6.722<br>67 | 1.6493794<br>45  | 0.721923<br>333  | 1.649379<br>445 | Up   | 0.003626<br>58  | 0.955609<br>729 |
| 27068  | PPA2         | Pyrophospha<br>tase<br>(inorganic) 2                                              | 6.632<br>36 | 7.397<br>5  | 6.791<br>15 | 7.797<br>52 | 7.409<br>64 | 7.728<br>61 | 1.6300542<br>73  | 0.70492          | 1.630054<br>273 | Up   | 0.026131<br>86  | 0.955609<br>729 |
| 6840   | SVIL         | Supervillin                                                                       | 8.145<br>91 | 8.225<br>98 | 8.009<br>22 | 6.796<br>98 | 7.956<br>2  | 7.403<br>75 | -1.6717896<br>49 | -0.74139<br>3333 | 1.671789<br>649 | Down | 0.044068<br>979 | 0.955609<br>729 |
| 51176  | LEF1         | Lymphoid<br>enhancer-bin<br>ding factor 1                                         | 5.174<br>07 | 4.705<br>37 | 5.061<br>71 | 4.344<br>43 | 4.691<br>88 | 4.039<br>15 | -1.5388969<br>92 | -0.62189<br>6667 | 1.538896<br>992 | Down | 0.023920<br>379 | 0.955609<br>729 |
| 4756   | NEO1         | Neogenin 1                                                                        | 5.682<br>11 | 6.657<br>59 | 6.304<br>12 | 6.954<br>9  | 6.854<br>25 | 6.764<br>72 | 1.5619518<br>71  | 0.64335          | 1.561951<br>871 | Up   | 0.047495<br>272 | 0.955609<br>729 |
| 284    | ANGP<br>T1   | Angiopoietin<br>1                                                                 | 8.629<br>71 | 7.686<br>02 | 6.638<br>04 | 5.077<br>92 | 6.831<br>92 | 5.558<br>08 | -3.5519632<br>79 | -1.82861<br>6667 | 3.551963<br>279 | Down | 0.022375<br>555 | 0.955609<br>729 |
| 54739  | XAF1         | XIAP<br>associated                                                                | 7.314<br>44 | 7.537<br>7  | 7.432<br>91 | 7.675<br>47 | 7.904<br>19 | 8.494<br>91 | 1.5120508<br>59  | 0.596506<br>667  | 1.512050<br>859 | Up   | 0.044470<br>032 | 0.955609<br>729 |

|        |            | factor 1                                                                                                                     |             |             |             |             |              |              |                  |                  |                 |      |                 |                 |
|--------|------------|------------------------------------------------------------------------------------------------------------------------------|-------------|-------------|-------------|-------------|--------------|--------------|------------------|------------------|-----------------|------|-----------------|-----------------|
| 10380  | BPNT1      | 3'(2'),<br>5'-bisphosph<br>ate<br>nucleotidase<br>1                                                                          | 5.914<br>5  | 6.381<br>07 | 5.759<br>32 | 6.563<br>73 | 6.498<br>75  | 6.903<br>83  | 1.5552429<br>86  | 0.63714          | 1.555242<br>986 | Up   | 0.026007<br>957 | 0.955609<br>729 |
| 284076 | TTLL6      | Tubulin<br>tyrosine<br>ligase like 6                                                                                         | 5.274<br>99 | 6.366<br>36 | 5.982<br>93 | 6.458<br>3  | 6.503<br>06  | 7.082<br>94  | 1.7491734<br>23  | 0.806673<br>333  | 1.749173<br>423 | Up   | 0.043226<br>583 | 0.955609<br>729 |
| 4735   | SEPT2      | Septin 2                                                                                                                     | 7.216<br>53 | 6.972<br>6  | 7.411<br>49 | 6.843<br>36 | 6.246<br>85  | 6.752<br>35  | -1.5010999<br>07 | -0.58602         | 1.501099<br>907 | Down | 0.036525<br>152 | 0.955609<br>729 |
| 3782   | KCNN<br>3  | Potassium<br>channel,<br>calcium<br>activated<br>intermediate/<br>small<br>conductance<br>subfamily N<br>$\alpha$ , member 3 | 6.581<br>42 | 5.509<br>89 | 5.976<br>08 | 4.857<br>61 | 5.449<br>41  | 4.942        | -1.9178058<br>38 | -0.93945<br>6667 | 1.917805<br>838 | Down | 0.019897<br>576 | 0.955609<br>729 |
| 57616  | TSHZ3      | Teashirt zinc<br>finger<br>homeobox 3                                                                                        | 6.469<br>59 | 5.227<br>68 | 5.205<br>66 | 3.927<br>87 | 5.251<br>13  | 4.173<br>81  | -2.2710718<br>25 | -1.18337<br>3333 | 2.271071<br>825 | Down | 0.040537<br>927 | 0.955609<br>729 |
| 116255 | MOGA<br>T1 | Monoacylgly<br>cerol<br>O-acyltransf<br>erase 1                                                                              | 8.379<br>18 | 9.892<br>35 | 9.919<br>38 | 10.73<br>41 | 10.74<br>022 | 10.01<br>279 | 2.1416657<br>46  | 1.098733<br>333  | 2.141665<br>746 | Up   | 0.048421<br>805 | 0.955609<br>729 |
| 1559   | CYP2C<br>9 | Cytochrome<br>P450, family<br>2, subfamily<br>C,                                                                             | 8.042<br>65 | 9.610<br>26 | 8.816<br>35 | 9.775<br>85 | 9.896<br>29  | 10.01<br>496 | 2.1032397<br>79  | 1.072613<br>333  | 2.103239<br>779 | Up   | 0.026871<br>426 | 0.955609<br>729 |

|        |             |                                                          |             |             |             |             |             |             |                  |                  |                 |      |                 |                 |
|--------|-------------|----------------------------------------------------------|-------------|-------------|-------------|-------------|-------------|-------------|------------------|------------------|-----------------|------|-----------------|-----------------|
|        |             | polypeptide<br>9                                         |             |             |             |             |             |             |                  |                  |                 |      |                 |                 |
| 10203  | CALC<br>RL  | Calcitonin<br>receptor like<br>receptor                  | 7.059<br>11 | 5.709<br>47 | 5.394<br>12 | 4.763<br>59 | 5.125<br>23 | 5.120<br>57 | -2.0721139<br>37 | -1.05110<br>3333 | 2.072113<br>937 | Down | 0.044805<br>23  | 0.955609<br>729 |
| 1644   | DDC         | Dopa<br>decarboxylas<br>e                                | 4.354<br>98 | 4.535<br>79 | 4.879<br>36 | 5.793<br>01 | 4.945<br>98 | 5.737<br>36 | 1.8687496<br>81  | 0.902073<br>333  | 1.868749<br>681 | Up   | 0.013573<br>457 | 0.955609<br>729 |
| 9556   | C14orf<br>2 | Chromosom<br>e 14 open<br>reading<br>frame 2             | 4.115<br>64 | 4.984<br>28 | 5.126<br>47 | 5.711<br>76 | 5.195<br>14 | 5.620<br>09 | 1.7015701<br>93  | 0.766866<br>667  | 1.701570<br>193 | Up   | 0.039321<br>299 | 0.955609<br>729 |
| 84329  | HVCN<br>1   | Hydrogen<br>voltage gated<br>channel 1                   | 5.225<br>07 | 4.469<br>36 | 4.826<br>14 | 3.715<br>45 | 4.489<br>75 | 4.124<br>4  | -1.6590108<br>63 | -0.73032<br>3333 | 1.659010<br>863 | Down | 0.029308<br>1   | 0.955609<br>729 |
| 725    | C4BPB       | Complement<br>component 4<br>binding<br>protein, $\beta$ | 5.726<br>39 | 6.696<br>45 | 6.906<br>32 | 7.055<br>74 | 7.838<br>88 | 7.737<br>08 | 2.1448052<br>66  | 1.100846<br>667  | 2.144805<br>266 | Up   | 0.021389<br>705 | 0.955609<br>729 |
| 115908 | CTHR<br>C1  | Collagen<br>triple helix<br>repeat<br>containing 1       | 7.406<br>57 | 5.618<br>14 | 7.100<br>81 | 4.650<br>32 | 4.953<br>96 | 4.861<br>73 | -3.6973800<br>22 | -1.88650<br>3333 | 3.697380<br>022 | Down | 0.004704<br>022 | 0.955609<br>729 |
| 573    | BAG1        | BCL2<br>associated<br>athanogene 1                       | 5.584<br>28 | 6.585<br>49 | 5.770<br>47 | 6.723<br>81 | 6.517<br>01 | 6.787<br>36 | 1.6199844<br>89  | 0.69598          | 1.619984<br>489 | Up   | 0.045294<br>551 | 0.955609<br>729 |
| 5578   | PRKC<br>A   | Protein<br>kinase C, $\alpha$                            | 5.543<br>63 | 6.398<br>28 | 6.445<br>84 | 7.152<br>59 | 6.740<br>41 | 6.775<br>66 | 1.6938467<br>26  | 0.760303<br>333  | 1.693846<br>726 | Up   | 0.034000<br>155 | 0.955609<br>729 |
| 990    | CDC6        | Cell division<br>cycle 6                                 | 6.332<br>45 | 7.227       | 7.237<br>96 | 8.246<br>2  | 8.449<br>17 | 8.501<br>49 | 2.7634745<br>64  | 1.466483<br>333  | 2.763474<br>564 | Up   | 0.001361<br>724 | 0.955609<br>729 |
| 161882 | ZFPM1       | Zinc finger                                              | 8.052       | 9.106       | 8.160       | 9.392       | 9.105       | 9.164       | 1.7182619        | 0.78095          | 1.718261        | Up   | 0.037553        | 0.955609        |

|           |             |                                                                |         |         |         |         |         |         |              |              |             |      |             |             |
|-----------|-------------|----------------------------------------------------------------|---------|---------|---------|---------|---------|---------|--------------|--------------|-------------|------|-------------|-------------|
| 161882    | ZFPM1       | Zinc finger protein, FOG family member 1                       | 8.05271 | 9.10699 | 8.16013 | 9.39258 | 9.10589 | 9.16421 | 1.718261958  | 0.78095      | 1.718261958 | Up   | 0.037553936 | 0.955609729 |
| 1488      | CTBP2       | C-terminal binding protein 2                                   | 6.89802 | 7.09022 | 6.50434 | 7.81793 | 7.18758 | 7.26848 | 1.509220219  | 0.593803333  | 1.509220219 | Up   | 0.049631995 | 0.955609729 |
| 100287175 | LOC10287175 | Uncharacterized LOC100287175                                   | 8.24491 | 8.98658 | 8.68898 | 9.7783  | 9.52784 | 8.8677  | 1.683102844  | 0.751123333  | 1.683102844 | Up   | 0.043229413 | 0.955609729 |
| 80760     | ITIH5       | Inter- $\alpha$ -trypsin inhibitor heavy chain family member 5 | 9.0474  | 6.88689 | 6.54181 | 5.20002 | 6.6976  | 5.30661 | -3.380625018 | -1.75729     | 3.380625018 | Down | 0.047805103 | 0.955609729 |
| 10590     | SCGN        | Secretagoin, EF-hand calcium binding protein                   | 4.06846 | 4.16228 | 4.48417 | 5.0137  | 4.74294 | 5.19845 | 1.677981333  | 0.746726667  | 1.677981333 | Up   | 0.004656412 | 0.955609729 |
| 8490      | RGS5        | Regulator of G-protein signaling 5                             | 7.96301 | 6.80106 | 6.76204 | 4.84386 | 5.67493 | 6.02431 | -3.162363773 | -1.661003333 | 3.162363773 | Down | 0.006881811 | 0.955609729 |
| 4240      | MFGE8       | Milk fat globule-EGF factor 8 protein                          | 5.08738 | 4.57699 | 4.55979 | 4.11166 | 3.82555 | 4.24894 | -1.60140328  | -0.679336667 | 1.60140328  | Down | 0.011127494 | 0.955609729 |
| 2316      | FLNA        | Filamin A, $\alpha$                                            | 9.10428 | 9.20616 | 8.7028  | 5.78567 | 8.62803 | 6.5583  | -4.038296014 | -2.013746667 | 4.038296014 | Down | 0.022542987 | 0.955609729 |
| 23366     | KIAA0       | KIAA0895                                                       | 2.976   | 3.984   | 3.234   | 4.624   | 3.870   | 4.033   | 1.7137895    | 0.77719      | 1.713789    | Up   | 0.040553    | 0.955609    |



|        |        |                                                 |              |              |             |             |             |             |                  |                  |                 |      |                 |                 |
|--------|--------|-------------------------------------------------|--------------|--------------|-------------|-------------|-------------|-------------|------------------|------------------|-----------------|------|-----------------|-----------------|
| 6383   | SDC2   | Syndecan 2                                      | 8.989<br>86  | 6.578<br>57  | 5.745<br>86 | 4.765<br>99 | 5.326<br>76 | 5.557<br>38 | -3.7013545<br>41 | -1.88805<br>3333 | 3.701354<br>541 | Down | 0.049177<br>074 | 0.955609<br>729 |
| 10398  | MYL9   | Myosin light chain 9                            | 10.26<br>508 | 10.23<br>723 | 9.957<br>27 | 7.263<br>58 | 9.935<br>54 | 7.977<br>26 | -3.3894863<br>64 | -1.76106<br>6667 | 3.389486<br>364 | Down | 0.029383<br>295 | 0.955609<br>729 |
| 79152  | FA2H   | Fatty acid 2-hydroxylase                        | 6.845<br>2   | 8.252<br>21  | 8.091<br>95 | 9.399<br>31 | 8.528<br>62 | 8.538<br>57 | 2.1322550<br>25  | 1.09238          | 2.132255<br>025 | Up   | 0.041475<br>934 | 0.955609<br>729 |
| 94101  | ORMDL1 | ORMDL sphingolipid biosynthesis regulator 1     | 5.360<br>48  | 5.747<br>94  | 5.853<br>61 | 6.664<br>88 | 6.459<br>87 | 6.601<br>3  | 1.8938735<br>39  | 0.92134          | 1.893873<br>539 | Up   | 0.001928<br>817 | 0.955609<br>729 |
| 137075 | CLDN23 | Claudin 23                                      | 6.124<br>74  | 7.130<br>16  | 7.137<br>14 | 8.662<br>26 | 7.304<br>12 | 8.068<br>88 | 2.3204533<br>06  | 1.214406<br>667  | 2.320453<br>306 | Up   | 0.025680<br>041 | 0.955609<br>729 |
| 23436  | CELA3B | Chymotrypsin like elastase family member 3B     | 3.348<br>36  | 3.792<br>93  | 3.340<br>63 | 4.690<br>2  | 4.416<br>93 | 4.948<br>55 | 2.2835103<br>57  | 1.191253<br>333  | 2.283510<br>357 | Up   | 0.000531<br>616 | 0.955609<br>729 |
| 11227  | GALNT5 | Polypeptide N-acetylgalactosaminyltransferase 5 | 4.485<br>87  | 5.154<br>88  | 5.151<br>43 | 6.877<br>29 | 5.753<br>31 | 6.038<br>15 | 2.4489952<br>91  | 1.29219          | 2.448995<br>291 | Up   | 0.007263<br>646 | 0.955609<br>729 |
| 7414   | VCL    | Vinculin                                        | 5.389<br>71  | 5.131<br>07  | 5.204<br>79 | 4.484<br>68 | 5.003<br>62 | 4.286<br>66 | -1.5693893<br>7  | -0.65020<br>3333 | 1.569389<br>37  | Down | 0.019112<br>54  | 0.955609<br>729 |
| 2355   | FOSL2  | FOS-like antigen 2                              | 8.020<br>58  | 7.394<br>48  | 7.787<br>04 | 7.197<br>63 | 6.722<br>95 | 7.244<br>37 | -1.6010851<br>1  | -0.67905         | 1.601085<br>11  | Down | 0.026047<br>627 | 0.955609<br>729 |
| 8805   | TRIM24 | Tripartite motif containing 24                  | 6.138<br>27  | 6.260<br>68  | 6.066<br>4  | 7.078<br>91 | 6.712<br>24 | 6.918<br>03 | 1.6793970<br>21  | 0.747943<br>333  | 1.679397<br>021 | Up   | 0.003447<br>696 | 0.955609<br>729 |
| 5270   | SERPI  | Serpin                                          | 6.488        | 6.056        | 5.978       | 4.932       | 5.851       | 5.691       | -1.6049221       | -0.68250         | 1.604922        | Down | 0.049757        | 0.955609        |

|       |           |                                                                                        |         |         |         |         |         |         |              |              |             |      |             |             |
|-------|-----------|----------------------------------------------------------------------------------------|---------|---------|---------|---------|---------|---------|--------------|--------------|-------------|------|-------------|-------------|
|       | NE2       | peptidase inhibitor, clade E (nexin, plasminogen activator inhibitor type 1), member 2 | 01      | 9       | 88      | 97      | 37      | 94      | 67           | 3333         | 167         |      | 586         | 729         |
| 654   | BMP6      | Bone morphogenetic protein 6                                                           | 4.57559 | 4.16257 | 5.29453 | 3.60655 | 4.09223 | 3.65174 | -1.858394342 | -0.894056667 | 1.858394342 | Down | 0.021633759 | 0.955609729 |
| 9232  | PTTG1     | Pituitary tumor-transforming 1                                                         | 4.93315 | 5.63362 | 5.28491 | 4.54147 | 4.87043 | 4.62444 | -1.521098241 | -0.605113333 | 1.521098241 | Down | 0.025409802 | 0.955609729 |
| 57561 | ARRDC3    | Arrestin domain containing 3                                                           | 7.59212 | 6.30397 | 7.38838 | 5.92911 | 4.93046 | 6.64694 | -2.393828836 | -1.25932     | 2.393828836 | Down | 0.045669144 | 0.955609729 |
| 4783  | NFIL3     | Nuclear factor, interleukin 3 regulated                                                | 8.31789 | 5.31043 | 6.29838 | 4.26452 | 5.27423 | 4.27174 | -4.108855705 | -2.038736667 | 4.108855705 | Down | 0.030342742 | 0.955609729 |
| 22841 | RAB11FIP2 | RAB11 family interacting protein 2 (class I)                                           | 4.17041 | 4.49963 | 4.09811 | 5.29208 | 4.93959 | 4.42513 | 1.547082358  | 0.62955      | 1.547082358 | Up   | 0.037339999 | 0.955609729 |
| 4621  | MYH3      | Myosin, heavy chain 3, skeletal muscle,                                                | 4.04839 | 4.62444 | 4.36679 | 5.42821 | 5.04405 | 4.925   | 1.724143674  | 0.78588      | 1.724143674 | Up   | 0.007549874 | 0.955609729 |

|        |           |                                                        |         |         |         |         |         |         |              |              |             |      |             |             |
|--------|-----------|--------------------------------------------------------|---------|---------|---------|---------|---------|---------|--------------|--------------|-------------|------|-------------|-------------|
| 4621   | MYH3      | Myosin, heavy chain 3, skeletal muscle, embryonic      | 4.04839 | 4.62444 | 4.36679 | 5.42821 | 5.04405 | 4.925   | 1.724143674  | 0.78588      | 1.724143674 | Up   | 0.007549874 | 0.955609729 |
| 348254 | CCDC144CP | Coiled-coil domain containing 144C, pseudogene         | 4.88193 | 4.14682 | 4.17319 | 5.67876 | 5.30554 | 4.89543 | 1.856514607  | 0.892596667  | 1.856514607 | Up   | 0.016528816 | 0.955609729 |
| 115207 | KCTD12    | Potassium channel tetramerization domain containing 12 | 8.07719 | 6.99328 | 7.31162 | 6.28256 | 6.57224 | 6.87845 | -1.844138061 | -0.882946667 | 1.844138061 | Down | 0.028133019 | 0.955609729 |
| 284047 | CCDC144B  | Coiled-coil domain containing 144B (pseudogene)        | 4.16657 | 3.23321 | 3.50829 | 4.60131 | 4.33706 | 4.13917 | 1.650790072  | 0.723156667  | 1.650790072 | Up   | 0.026880281 | 0.955609729 |
| 55329  | MNS1      | Meiosis specific nuclear structural 1                  | 5.06484 | 4.14015 | 4.12258 | 3.36732 | 3.52163 | 3.60905 | -1.922775066 | -0.94319     | 1.922775066 | Down | 0.009819628 | 0.955609729 |
| 5538   | PPT1      | Palmitoyl-protein thioesterase 1                       | 6.42567 | 6.1348  | 6.31123 | 5.43899 | 5.10147 | 5.89363 | -1.756296797 | -0.812536667 | 1.756296797 | Down | 0.010999559 | 0.955609729 |
| 23328  | SASH1     | SAM and                                                | 5.968   | 4.616   | 4.665   | 3.939   | 4.215   | 4.360   | -1.8810958   | -0.91157     | 1.881095    | Down | 0.045943    | 0.955609    |

|        |              |                                              |              |              |             |             |             |             |                  |                  |                 |      |                 |                 |
|--------|--------------|----------------------------------------------|--------------|--------------|-------------|-------------|-------------|-------------|------------------|------------------|-----------------|------|-----------------|-----------------|
| 56474  | CTPS2        | CTP synthase 2                               | 5.024<br>12  | 5.331<br>64  | 5.202<br>49 | 5.981<br>42 | 5.423<br>63 | 5.918<br>35 | 1.5035609<br>31  | 0.588383<br>333  | 1.503560<br>931 | Up   | 0.023216<br>758 | 0.955609<br>729 |
| 161198 | CLEC1<br>4A  | C-type lectin domain family 14, member A     | 7.370<br>17  | 6.071<br>54  | 5.790<br>45 | 5.214<br>46 | 5.139<br>12 | 5.688<br>02 | -2.0900247<br>11 | -1.06352         | 2.090024<br>711 | Down | 0.041328<br>826 | 0.955609<br>729 |
| 5997   | RGS2         | Regulator of G-protein signaling 2           | 10.68<br>034 | 10.19<br>948 | 9.583<br>19 | 8.413<br>67 | 9.167<br>42 | 8.478<br>08 | -2.7662789<br>93 | -1.46794<br>6667 | 2.766278<br>993 | Down | 0.003739<br>484 | 0.955609<br>729 |
| 26049  | FAM16<br>9A  | Family with sequence similarity 169 member A | 5.450<br>45  | 6.927<br>79  | 7.134<br>83 | 7.663<br>52 | 8.104<br>52 | 7.292<br>71 | 2.2697918<br>47  | 1.18256          | 2.269791<br>847 | Up   | 0.041889<br>914 | 0.955609<br>729 |
| 401105 | FLJ423<br>93 | Uncharacterized LOC401105                    | 6.452<br>16  | 6.781<br>84  | 7.629<br>48 | 5.524<br>47 | 4.929<br>6  | 5.204<br>46 | -3.3287564<br>83 | -1.73498<br>3333 | 3.328756<br>483 | Down | 0.001420<br>515 | 0.955609<br>729 |
| 1948   | EFNB2        | Ephrin-B2                                    | 8.301<br>94  | 6.383<br>87  | 6.229<br>1  | 5.352<br>29 | 5.504<br>72 | 5.685<br>89 | -2.7460095<br>95 | -1.45733<br>6667 | 2.746009<br>595 | Down | 0.032031<br>85  | 0.955609<br>729 |
| 347733 | TUBB2<br>B   | Tubulin, $\beta$ 2B class iib                | 7.898<br>44  | 7.853<br>6   | 8.260<br>59 | 6.287<br>2  | 7.482<br>87 | 6.369<br>53 | -2.4469930<br>43 | -1.29101         | 2.446993<br>043 | Down | 0.007928<br>414 | 0.955609<br>729 |
| 54492  | NEUR<br>L1B  | Neuralized E3 ubiquitin protein ligase 1B    | 8.989<br>13  | 7.530<br>16  | 7.166<br>98 | 5.434<br>18 | 7.111<br>71 | 6.634<br>61 | -2.8322003<br>66 | -1.50192<br>3333 | 2.832200<br>366 | Down | 0.041369<br>091 | 0.955609<br>729 |
| 10418  | SPON1        | Spondin 1, extracellular matrix protein      | 6.048<br>35  | 6.353<br>36  | 6.130<br>05 | 5.047<br>7  | 5.993<br>17 | 4.977<br>23 | -1.7874299<br>05 | -0.83788<br>6667 | 1.787429<br>905 | Down | 0.026501<br>541 | 0.955609<br>729 |
| 1465   | CSRP1        | Cysteine and glycine rich                    | 8.878<br>92  | 8.293<br>2   | 8.494<br>01 | 7.260<br>38 | 8.229<br>86 | 7.443<br>01 | -1.8802962<br>71 | -0.91096         | 1.880296<br>271 | Down | 0.020346<br>568 | 0.955609<br>729 |

|           |             |                                                           |         |          |          |          |          |          |              |              |             |      |             |             |
|-----------|-------------|-----------------------------------------------------------|---------|----------|----------|----------|----------|----------|--------------|--------------|-------------|------|-------------|-------------|
|           |             | protein 1                                                 |         |          |          |          |          |          |              |              |             |      |             |             |
| 728239    | MAGE D4     | Melanoma antigen family D4                                | 5.46145 | 6.50094  | 4.99384  | 6.90646  | 6.98994  | 6.87491  | 2.414447901  | 1.271693333  | 2.414447901 | Up   | 0.012137053 | 0.955609729 |
| 3708      | ITPR1       | Inositol 1,4,5-trisphosphate receptor, type 1             | 8.49525 | 7.7138   | 7.84662  | 5.29905  | 7.45167  | 6.30042  | -3.178126757 | -1.668176667 | 3.178126757 | Down | 0.018029103 | 0.955609729 |
| 2113      | ETS1        | V-ets avian erythroblastosis virus E26 oncogene homolog 1 | 9.62691 | 8.02667  | 8.69066  | 6.98047  | 7.85948  | 7.96394  | -2.265951004 | -1.180116667 | 2.265951004 | Down | 0.037312378 | 0.955609729 |
| 121512    | FGD4        | FYVE, rhogef and PH domain containing 4                   | 7.44034 | 7.59004  | 7.71744  | 8.64613  | 8.24619  | 7.7194   | 1.53826067   | 0.6213       | 1.53826067  | Up   | 0.049178518 | 0.955609729 |
| 441386    | RPS26 P3    | Ribosomal protein S26 pseudogene 3                        | 10.9709 | 11.15144 | 11.22933 | 12.06451 | 11.34135 | 12.07815 | 1.636688762  | 0.71078      | 1.636688762 | Up   | 0.019504025 | 0.955609729 |
| 389384    | C6orf22     | Chromosome 6 open reading frame 222                       | 4.85817 | 5.16779  | 5.34808  | 6.6518   | 6.51619  | 5.44909  | 2.115521479  | 1.081013333  | 2.115521479 | Up   | 0.016828898 | 0.955609729 |
| 2526      | FUT4        | Fucosyltransferase 4                                      | 6.34215 | 7.28724  | 6.87802  | 8.78653  | 7.32882  | 7.76085  | 2.177888356  | 1.12293      | 2.177888356 | Up   | 0.033490852 | 0.955609729 |
| 105377751 | LOC10537751 | Uncharacterized LOC105377                                 | 3.68869 | 4.0597   | 3.03113  | 3.96192  | 4.77083  | 4.72872  | 1.85829988   | 0.893983333  | 1.85829988  | Up   | 0.029300486 | 0.955609729 |

|               |                      |                                                       |             |             |             |              |              |              |                  |                  |                 |      |                 |                 |
|---------------|----------------------|-------------------------------------------------------|-------------|-------------|-------------|--------------|--------------|--------------|------------------|------------------|-----------------|------|-----------------|-----------------|
|               |                      | 751                                                   |             |             |             |              |              |              |                  |                  |                 |      |                 |                 |
| 642946        | FLVC<br>R1-AS<br>1   | FLVCR1<br>antisense<br>RNA 1 (head<br>to head)        | 6.358<br>98 | 7.010<br>13 | 5.781<br>07 | 7.767<br>76  | 7.447<br>54  | 7.416<br>87  | 2.2356019<br>42  | 1.160663<br>333  | 2.235601<br>942 | Up   | 0.009327<br>456 | 0.955609<br>729 |
| 10171         | RCL1                 | RNA<br>terminal<br>phosphate<br>cyclase-like<br>1     | 5.535<br>96 | 4.777<br>62 | 5.200<br>45 | 4.530<br>03  | 4.328<br>92  | 4.887<br>1   | -1.5045443<br>84 | -0.58932<br>6667 | 1.504544<br>384 | Down | 0.046548<br>285 | 0.955609<br>729 |
| 25816         | TNFAI<br>P8          | TNF $\alpha$<br>induced<br>protein 8                  | 6.256<br>4  | 5.579<br>52 | 6.046<br>02 | 4.574<br>49  | 5.082<br>02  | 5.050<br>19  | -2.0826397<br>88 | -1.05841<br>3333 | 2.082639<br>788 | Down | 0.003368<br>254 | 0.955609<br>729 |
| 100507<br>412 | LOC10<br>050741<br>2 | Uncharacteri<br>zed<br>LOC100507<br>412               | 9.252<br>2  | 8.496<br>9  | 9.654<br>94 | 10.46<br>388 | 10.63<br>279 | 10.10<br>649 | 2.4055609<br>16  | 1.266373<br>333  | 2.405560<br>916 | Up   | 0.005884<br>84  | 0.955609<br>729 |
| 9586          | CREB5                | Camp<br>responsive<br>element<br>binding<br>protein 5 | 7.276<br>57 | 7.220<br>45 | 6.411<br>18 | 8.240<br>18  | 7.423<br>58  | 7.702<br>57  | 1.7646433<br>93  | 0.819376<br>667  | 1.764643<br>393 | Up   | 0.038413<br>364 | 0.955609<br>729 |
| 7010          | TEK                  | TEK<br>tyrosine<br>kinase,<br>endothelial             | 8.325<br>72 | 6.398<br>28 | 6.055<br>09 | 4.920<br>74  | 5.615<br>19  | 5.666<br>38  | -2.8790509<br>76 | -1.52559<br>3333 | 2.879050<br>976 | Down | 0.038670<br>045 | 0.955609<br>729 |
| 440138        | ALG11                | ALG11,<br>$\alpha$ -1,2-manno<br>syltransferas<br>e   | 5.886<br>54 | 6.079<br>45 | 6.235<br>95 | 6.877<br>3   | 6.767<br>74  | 6.722<br>67  | 1.6493794<br>45  | 0.721923<br>333  | 1.649379<br>445 | Up   | 0.003626<br>58  | 0.955609<br>729 |
| 84612         | PARD6                | Par-6 family                                          | 4.990       | 4.706       | 4.732       | 5.929        | 6.314        | 5.468        | 2.1351143        | 1.094313         | 2.135114        | Up   | 0.002878        | 0.955609        |

|           |             |                                                               |         |         |         |         |         |         |              |              |             |      |             |             |
|-----------|-------------|---------------------------------------------------------------|---------|---------|---------|---------|---------|---------|--------------|--------------|-------------|------|-------------|-------------|
|           | B           | cell polarity regulator $\beta$                               | 99      | 1       | 03      | 11      | 81      | 14      | 43           | 333          | 343         |      | 55          | 729         |
| 171220    | DSTNP2      | Destrin (actin depolymerizing factor) pseudogene 2            | 3.93291 | 4.46933 | 4.46515 | 5.14717 | 4.79643 | 4.73258 | 1.518797995  | 0.60293      | 1.518797995 | Up   | 0.021699495 | 0.955609729 |
| 2992      | GYG1        | Glycogenin 1                                                  | 6.13634 | 5.7694  | 6.08185 | 5.30251 | 4.86413 | 5.68494 | -1.63807718  | -0.712003333 | 1.63807718  | Down | 0.02330095  | 0.955609729 |
| 100505385 | IQCJ-SCHIP1 | IQCJ-SCHIP1 readthrough                                       | 7.69673 | 6.98229 | 6.88494 | 5.7575  | 6.03204 | 6.65385 | -2.056498472 | -1.04019     | 2.056498472 | Down | 0.014692544 | 0.955609729 |
| 1073      | CFL2        | Cofilin 2 (muscle)                                            | 6.69917 | 5.33674 | 5.20705 | 4.70932 | 4.7573  | 4.37108 | -2.196317562 | -1.135086667 | 2.196317562 | Down | 0.026625748 | 0.955609729 |
| 102723553 | SMIM11B     | Small integral membrane protein 11B                           | 5.72511 | 5.87277 | 6.12979 | 7.16954 | 6.33185 | 6.63989 | 1.746584772  | 0.804536667  | 1.746584772 | Up   | 0.016401594 | 0.955609729 |
| 84680     | ACCS        | 1-aminocyclopropane-1-carboxylate synthase homolog (inactive) | 7.19174 | 7.29992 | 6.71582 | 7.99614 | 7.37538 | 7.96462 | 1.635297741  | 0.709553333  | 1.635297741 | Up   | 0.027607602 | 0.955609729 |
| 26118     | WSB1        | WD repeat and SOCS box containing 1                           | 5.75815 | 6.36299 | 6.7877  | 5.46098 | 5.25211 | 5.82992 | -1.727409346 | -0.78861     | 1.727409346 | Down | 0.034828079 | 0.955609729 |
| 54097     | FAM3B       | Family with sequence                                          | 7.61672 | 8.98351 | 8.63249 | 9.47556 | 9.21536 | 9.13247 | 1.819518433  | 0.863556667  | 1.819518433 | Up   | 0.047042436 | 0.955609729 |

|       |             |                                                                              |              |             |             |             |             |             |                  |                  |                 |      |                 |                 |
|-------|-------------|------------------------------------------------------------------------------|--------------|-------------|-------------|-------------|-------------|-------------|------------------|------------------|-----------------|------|-----------------|-----------------|
|       |             | similarity 3<br>member B                                                     |              |             |             |             |             |             |                  |                  |                 |      |                 |                 |
| 11217 | AKAP<br>2   | A-kinase<br>anchoring<br>protein 2                                           | 10.14<br>756 | 8.853<br>23 | 9.068<br>01 | 8.563<br>71 | 8.506<br>12 | 8.511<br>51 | -1.7766424<br>08 | -0.82915<br>3333 | 1.776642<br>408 | Down | 0.046346<br>954 | 0.955609<br>729 |
| 2004  | ELK3        | ELK3,<br>ETS-domain<br>protein (SRF<br>accessory<br>protein 2)               | 9.719<br>84  | 8.262<br>82 | 8.305<br>97 | 7.228<br>93 | 7.638<br>93 | 8.111<br>72 | -2.1480337<br>58 | -1.10301<br>6667 | 2.148033<br>758 | Down | 0.043123<br>29  | 0.955609<br>729 |
| 9811  | CTIF        | CBP80/20-d<br>ependent<br>translation<br>initiation<br>factor                | 6.615<br>64  | 6.547<br>42 | 6.518<br>71 | 5.560<br>16 | 6.159<br>97 | 5.354<br>31 | -1.8265357<br>61 | -0.86911         | 1.826535<br>761 | Down | 0.008157<br>235 | 0.955609<br>729 |
| 25932 | CLIC4       | Chloride<br>intracellular<br>channel 4                                       | 7.682<br>31  | 6.756<br>19 | 6.531<br>99 | 6.091       | 6.257<br>85 | 6.140<br>42 | -1.7740827<br>86 | -0.82707<br>3333 | 1.774082<br>786 | Down | 0.033276<br>327 | 0.955609<br>729 |
| 6578  | SLCO2<br>A1 | Solute<br>carrier<br>organic<br>anion<br>transporter<br>family<br>member 2A1 | 8.407<br>81  | 7.749<br>97 | 7.838<br>97 | 6.753<br>58 | 7.712<br>08 | 7.308<br>02 | -1.6713609<br>49 | -0.74102<br>3333 | 1.671360<br>949 | Down | 0.046069<br>645 | 0.955609<br>729 |
| 6335  | SCN9A       | Sodium<br>channel,<br>voltage<br>gated, type<br>IX $\alpha$ subunit          | 4.958<br>37  | 5.203<br>09 | 4.643<br>24 | 5.839<br>18 | 5.281<br>17 | 5.929<br>11 | 1.6797579<br>21  | 0.748253<br>333  | 1.679757<br>921 | Up   | 0.017166<br>403 | 0.955609<br>729 |
| 84331 | FAM19       | Family with                                                                  | 8.244        | 8.986       | 8.688       | 9.778       | 9.527       | 8.867       | 1.6831028        | 0.751123         | 1.683102        | Up   | 0.043229        | 0.955609        |



|               |              |                                                   |         |          |          |          |          |          |              |              |             |      |             |             |
|---------------|--------------|---------------------------------------------------|---------|----------|----------|----------|----------|----------|--------------|--------------|-------------|------|-------------|-------------|
|               | 5A           | sequence similarity<br>195 member<br>A            | 91      | 58       | 98       | 3        | 84       | 7        | 44           | 333          | 844         |      | 413         | 729         |
| 11211         | FZD10        | Frizzled class<br>receptor 10                     | 4.1975  | 4.07092  | 4.12099  | 3.11933  | 4.01621  | 3.21788  | -1.600656049 | -0.678663333 | 1.600656049 | Down | 0.026254315 | 0.955609729 |
| 340542        | BEX5         | Brain expressed<br>X-linked 5                     | 8.53096 | 9.98934  | 9.3434   | 10.72186 | 9.78885  | 10.40717 | 2.025193838  | 1.01806      | 2.025193838 | Up   | 0.044299717 | 0.955609729 |
| 81608         | FIP1L1       | Factor interacting<br>with<br>PAPOLA<br>and CPSF1 | 6.33585 | 7.01511  | 7.00022  | 7.80959  | 7.04951  | 7.62381  | 1.636458103  | 0.710576667  | 1.636458103 | Up   | 0.043416119 | 0.955609729 |
| 11167         | FSTL1        | Follistatin<br>like 1                             | 7.29035 | 5.39675  | 5.1924   | 3.73048  | 4.47883  | 4.96855  | -2.963317754 | -1.567213333 | 2.963317754 | Down | 0.036329144 | 0.955609729 |
| 4638          | MYLK         | Myosin light<br>chain kinase                      | 9.64703 | 9.51765  | 8.71321  | 5.20081  | 8.62535  | 6.62087  | -5.567205483 | -2.476953333 | 5.567205483 | Down | 0.019856789 | 0.955609729 |
| 101929<br>876 | LOC101929876 | 40S<br>ribosomal<br>protein S26                   | 10.9709 | 11.15144 | 11.22933 | 12.06451 | 11.34135 | 12.07815 | 1.636688762  | 0.71078      | 1.636688762 | Up   | 0.019504025 | 0.955609729 |
| 100533<br>181 | FXYD6-FXYD2  | FXYD6-FX<br>YD2<br>readthrough                    | 7.79421 | 6.94296  | 6.82305  | 4.41669  | 6.85592  | 5.85013  | -2.787863644 | -1.47916     | 2.787863644 | Down | 0.048251866 | 0.955609729 |
| 4628          | MYH10        | Myosin,<br>heavy chain<br>10,<br>non-muscle       | 5.69622 | 5.13881  | 4.91672  | 4.57208  | 4.53218  | 4.68122  | -1.575078064 | -0.655423333 | 1.575078064 | Down | 0.020709186 | 0.955609729 |
| 148523        | CIART        | Circadian<br>associated                           | 4.48865 | 5.19815  | 5.29833  | 7.51805  | 5.29409  | 7.12009  | 3.136234278  | 1.649033333  | 3.136234278 | Up   | 0.026466979 | 0.955609729 |

|           |             |                                                            |         |         |         |          |          |          |              |              |             |      |             |             |
|-----------|-------------|------------------------------------------------------------|---------|---------|---------|----------|----------|----------|--------------|--------------|-------------|------|-------------|-------------|
|           |             | repressor of transcription                                 |         |         |         |          |          |          |              |              |             |      |             |             |
| 5420      | PODXL       | Podocalyxin-like                                           | 8.37661 | 7.14614 | 7.11281 | 6.05223  | 6.39097  | 6.95173  | -2.114343825 | -1.08021     | 2.114343825 | Down | 0.033960081 | 0.955609729 |
| 4588      | MUC6        | Mucin 6, oligomeric mucus/gel-forming                      | 7.34869 | 9.34381 | 9.77914 | 12.23407 | 10.87266 | 11.66247 | 6.801501794  | 2.765853333  | 6.801501794 | Up   | 0.00480813  | 0.955609729 |
| 23197     | FAF2        | Fas associated factor family member 2                      | 5.85259 | 6.2679  | 6.2759  | 6.84125  | 7.13068  | 6.40953  | 1.581934647  | 0.66169      | 1.581934647 | Up   | 0.029831565 | 0.955609729 |
| 26051     | PPP1R16B    | Protein phosphatase 1 regulatory subunit 16B               | 7.35118 | 5.46882 | 6.18306 | 4.82963  | 5.02069  | 5.45435  | -2.350221393 | -1.232796667 | 2.350221393 | Down | 0.035076206 | 0.955609729 |
| 51701     | NLK         | Nemo-like kinase                                           | 7.39183 | 7.82219 | 7.30631 | 8.2158   | 8.02971  | 8.3544   | 1.616858396  | 0.693193333  | 1.616858396 | Up   | 0.011692837 | 0.955609729 |
| 83539     | CHST9       | Carbohydrate (N-acetylglactosamine 4-O) sulfotransferase 9 | 4.5729  | 5.09961 | 5.03636 | 6.00828  | 5.2929   | 5.54602  | 1.638955481  | 0.712776667  | 1.638955481 | Up   | 0.022768018 | 0.955609729 |
| 9391      | CIAO1       | Cytosolic iron-sulfur assembly component 1                 | 5.57585 | 5.53502 | 6.62792 | 7.05135  | 6.49877  | 6.79912  | 1.827852936  | 0.87015      | 1.827852936 | Up   | 0.036673909 | 0.955609729 |
| 105372824 | LOC10537282 | Uncharacterized protein                                    | 5.98118 | 6.7183  | 6.59846 | 7.39628  | 7.01425  | 6.83207  | 1.567233347  | 0.64822      | 1.567233347 | Up   | 0.04339205  | 0.955609729 |

|           |              |                                              |         |          |          |          |          |          |              |              |             |      |             |             |
|-----------|--------------|----------------------------------------------|---------|----------|----------|----------|----------|----------|--------------|--------------|-------------|------|-------------|-------------|
| 105372824 | LOC105372824 | Uncharacterized protein c21orf124            | 5.98118 | 6.7183   | 6.59846  | 7.39628  | 7.01425  | 6.83207  | 1.567233347  | 0.64822      | 1.567233347 | Up   | 0.04339205  | 0.955609729 |
| 5051      | PAFAH2       | Platelet-activating factor acetylhydrolase 2 | 3.90226 | 5.09269  | 5.18461  | 5.91862  | 5.54425  | 5.72724  | 2.004881082  | 1.003516667  | 2.004881082 | Up   | 0.026306401 | 0.955609729 |
| 400506    | KNOP1        | Lysine-rich nucleolar protein 1              | 6.91145 | 7.38662  | 7.19567  | 7.80597  | 8.24422  | 7.58578  | 1.640432995  | 0.714076667  | 1.640432995 | Up   | 0.019138247 | 0.955609729 |
| 117854    | TRIM6        | Tripartite motif containing 6                | 5.97928 | 5.56221  | 5.28965  | 4.50131  | 5.14533  | 4.68342  | -1.782242109 | -0.833693333 | 1.782242109 | Down | 0.01295428  | 0.955609729 |
| 3248      | HPGD         | Hydroxyprostaglandin dehydrogenase 15-(NAD)  | 6.69485 | 7.7447   | 6.95254  | 7.95547  | 7.67204  | 7.93868  | 1.652556961  | 0.7247       | 1.652556961 | Up   | 0.043505376 | 0.955609729 |
| 56907     | SPIRE1       | Spire-type actin nucleation factor 1         | 8.28223 | 7.70751  | 7.71749  | 6.984    | 7.50423  | 6.5806   | -1.83969508  | -0.879466667 | 1.83969508  | Down | 0.0204461   | 0.955609729 |
| 1809      | DPYSL3       | Dihydropyrimidinase like 3                   | 6.13566 | 4.35379  | 4.56356  | 2.98759  | 4.18967  | 3.16103  | -2.972286806 | -1.571573333 | 2.972286806 | Down | 0.022580497 | 0.955609729 |
| 6231      | RPS26        | Ribosomal protein S26                        | 10.9709 | 11.15144 | 11.22933 | 12.06451 | 11.34135 | 12.07815 | 1.636688762  | 0.71078      | 1.636688762 | Up   | 0.019504025 | 0.955609729 |
| 5621      | PRNP         | Prion protein                                | 7.66454 | 6.74428  | 7.11883  | 6.37644  | 5.84881  | 6.72967  | -1.811992101 | -0.857576667 | 1.811992101 | Down | 0.032813287 | 0.955609729 |
| 57462     | KIAA1161     | KIAA1161                                     | 5.15417 | 6.25507  | 5.76013  | 6.64589  | 6.36285  | 6.52543  | 1.726998305  | 0.788266667  | 1.726998305 | Up   | 0.031116268 | 0.955609729 |
| 2273      | FHL1         | Four and a                                   | 10.92   | 7.463    | 7.110    | 4.539    | 6.276    | 6.094    | -7.2813535   | -2.86420     | 7.281353    | Down | 0.030200    | 0.955609    |

|           |              |                                                             |         |         |         |         |         |         |              |              |             |      |             |             |
|-----------|--------------|-------------------------------------------------------------|---------|---------|---------|---------|---------|---------|--------------|--------------|-------------|------|-------------|-------------|
| 25825     | BACE2        | B-site APP-cleaving enzyme 2                                | 7.43194 | 7.97497 | 7.81604 | 8.41369 | 8.62673 | 8.13321 | 1.569414752  | 0.650226667  | 1.569414752 | Up   | 0.021819233 | 0.955609729 |
| 6591      | SNAI2        | Snail family zinc finger 2                                  | 7.09906 | 5.70062 | 5.65306 | 4.6673  | 5.04155 | 4.9466  | -2.404544012 | -1.265763333 | 2.404544012 | Down | 0.016712888 | 0.955609729 |
| 977       | CD151        | CD151 molecule (Raph blood group)                           | 9.31631 | 9.03382 | 9.26503 | 8.57549 | 8.81207 | 8.14376 | -1.618450603 | -0.694613333 | 1.618450603 | Down | 0.01573791  | 0.955609729 |
| 101928168 | LOC101928168 | Uncharacterized LOC101928168                                | 6.36212 | 6.49398 | 6.0664  | 7.48578 | 6.96308 | 7.84714 | 2.180259714  | 1.1245       | 2.180259714 | Up   | 0.004104425 | 0.955609729 |
| 79056     | PRRG4        | Proline rich Gla (G-carboxyglutamic acid) 4 (transmembrane) | 3.66165 | 3.92639 | 4.32475 | 4.82986 | 4.34133 | 4.74488 | 1.588604505  | 0.66776      | 1.588604505 | Up   | 0.018277738 | 0.955609729 |
| 3115      | HLA-DPB1     | Major histocompatibility complex, class II, DPβ1            | 3.12138 | 2.71964 | 7.61231 | 8.27509 | 8.87426 | 7.84585 | 14.39294587  | 3.84729      | 14.39294587 | Up   | 0.018542717 | 0.955609729 |
| 10165     | SLC25A13     | Solute carrier family 25 (aspartate/glutamate)              | 8.12546 | 7.89533 | 8.24473 | 8.98872 | 8.43533 | 8.63098 | 1.512047366  | 0.596503333  | 1.512047366 | Up   | 0.023557621 | 0.955609729 |

|        |          |                                                                   |          |         |         |         |         |         |              |              |             |      |             |             |
|--------|----------|-------------------------------------------------------------------|----------|---------|---------|---------|---------|---------|--------------|--------------|-------------|------|-------------|-------------|
| 10165  | SLC25A13 | Solute carrier family 25 (aspartate/glutamate carrier), member 13 | 8.12546  | 7.89533 | 8.24473 | 8.98872 | 8.43533 | 8.63098 | 1.512047366  | 0.596503333  | 1.512047366 | Up   | 0.023557621 | 0.955609729 |
| 252983 | STXBP4   | Syntaxin binding protein 4                                        | 6.22717  | 6.95669 | 6.31353 | 6.88362 | 7.21679 | 7.38519 | 1.583082747  | 0.662736667  | 1.583082747 | Up   | 0.036877147 | 0.955609729 |
| 9270   | ITGB1BP1 | Integrin $\beta$ 1 binding protein 1                              | 11.23483 | 8.05543 | 6.61593 | 5.12057 | 6.02084 | 5.43891 | -8.625591143 | -3.108623333 | 8.625591143 | Down | 0.025422981 | 0.955609729 |
| 3822   | KLRC2    | Killer cell lectin-like receptor subfamily C, member 2            | 4.24177  | 3.67414 | 3.58905 | 4.83    | 5.45603 | 5.83127 | 2.902803001  | 1.537446667  | 2.902803001 | Up   | 0.00149172  | 0.955609729 |
| 2331   | FMOD     | Fibromodulin                                                      | 5.57379  | 4.78525 | 4.71535 | 3.88759 | 4.68611 | 4.08008 | -1.749411885 | -0.80687     | 1.749411885 | Down | 0.034060964 | 0.955609729 |
| 57493  | HEG1     | Heart development protein with EGF-like domains 1                 | 9.3175   | 7.81526 | 7.72124 | 6.16524 | 7.52946 | 7.06722 | -2.574026072 | -1.364026667 | 2.574026072 | Down | 0.037238224 | 0.955609729 |
| 9342   | SNAP29   | Synaptosome associated protein 29kda                              | 6.28587  | 6.21159 | 5.85019 | 6.83255 | 6.52122 | 6.82225 | 1.525684513  | 0.609456667  | 1.525684513 | Up   | 0.01665029  | 0.955609729 |
| 55283  | MCOLN3   | Mucolipin 3                                                       | 4.61899  | 5.97408 | 3.97674 | 6.57902 | 6.461   | 5.66197 | 2.597985418  | 1.377393333  | 2.597985418 | Up   | 0.035436453 | 0.955609729 |

|        |               |                                                                                                             |             |             |             |              |              |              |                  |                  |                 |      |                 |                 |
|--------|---------------|-------------------------------------------------------------------------------------------------------------|-------------|-------------|-------------|--------------|--------------|--------------|------------------|------------------|-----------------|------|-----------------|-----------------|
| 3778   | KCNM<br>A1    | Potassium<br>channel,<br>calcium<br>activated<br>large<br>conductance<br>subfamily M<br>$\alpha$ , member 1 | 6.119<br>55 | 6.562<br>8  | 5.872<br>72 | 3.663<br>07  | 5.276<br>97  | 3.946<br>03  | -3.7054959<br>97 | -1.88966<br>6667 | 3.705495<br>997 | Down | 0.003734<br>481 | 0.955609<br>729 |
| 653316 | FAM15<br>3C   | Family with<br>sequence<br>similarity<br>153, member<br>C                                                   | 3.688<br>69 | 4.059<br>7  | 3.031<br>13 | 3.961<br>92  | 4.770<br>83  | 4.728<br>72  | 1.8582998<br>8   | 0.893983<br>333  | 1.858299<br>88  | Up   | 0.029300<br>486 | 0.955609<br>729 |
| 3696   | ITGB8         | Integrin $\beta$ 8                                                                                          | 3.820<br>93 | 3.812<br>51 | 4.125<br>57 | 4.895<br>26  | 4.728<br>22  | 4.100<br>52  | 1.5746123<br>15  | 0.654996<br>667  | 1.574612<br>315 | Up   | 0.024707<br>157 | 0.955609<br>729 |
| 570    | BAAT          | Bile<br>acid-coa:ami<br>no acid<br>N-acyltransf<br>erase                                                    | 8.705<br>81 | 9.863<br>69 | 9.748<br>27 | 10.65<br>616 | 10.54<br>473 | 10.35<br>422 | 2.1127372<br>14  | 1.079113<br>333  | 2.112737<br>214 | Up   | 0.013074<br>663 | 0.955609<br>729 |
| 8777   | MPDZ          | Multiple<br>PDZ domain<br>protein                                                                           | 7.971<br>98 | 6.055<br>21 | 5.863<br>01 | 3.993<br>36  | 5.593<br>38  | 4.895<br>03  | -3.4889913       | -1.80281         | 3.488991<br>3   | Down | 0.028293<br>754 | 0.955609<br>729 |
| 94122  | SYTL5         | Synaptotagm<br>in like 5                                                                                    | 4.078<br>12 | 4.858<br>24 | 4.173<br>43 | 5.841<br>65  | 5.413<br>84  | 4.959<br>24  | 2.0490852<br>4   | 1.03498          | 2.049085<br>24  | Up   | 0.011153<br>461 | 0.955609<br>729 |
| 64902  | AGXT<br>2     | Alanine--gly<br>oxylate<br>aminotransfe<br>rase 2                                                           | 4.234<br>19 | 4.466<br>89 | 4.610<br>3  | 5.338<br>59  | 5.141<br>14  | 4.873<br>61  | 1.6028654<br>58  | 0.680653<br>333  | 1.602865<br>458 | Up   | 0.006828<br>333 | 0.955609<br>729 |
| 8794   | TNFRS<br>F10C | Tumor<br>necrosis                                                                                           | 4.808<br>54 | 5.735<br>06 | 5.043<br>25 | 5.945<br>03  | 5.845<br>01  | 5.712<br>25  | 1.5566881<br>94  | 0.63848          | 1.556688<br>194 | Up   | 0.043638<br>733 | 0.955609<br>729 |

|        |        |                                                                               |         |         |         |         |         |         |              |             |             |      |             |             |
|--------|--------|-------------------------------------------------------------------------------|---------|---------|---------|---------|---------|---------|--------------|-------------|-------------|------|-------------|-------------|
|        |        | factor receptor superfamily member 10c, decoy without an intracellular domain |         |         |         |         |         |         |              |             |             |      |             |             |
| 28982  | FLVCR1 | Feline leukemia virus subgroup C cellular receptor 1                          | 3.47982 | 4.49406 | 4.98428 | 5.57931 | 5.02473 | 5.17566 | 1.919211002  | 0.940513333 | 1.919211002 | Up   | 0.045600788 | 0.955609729 |
| 29965  | CDIP1  | Cell death-inducing p53 target 1                                              | 7.56032 | 7.43516 | 7.45747 | 8.31783 | 8.41856 | 7.58096 | 1.538438387  | 0.621466667 | 1.538438387 | Up   | 0.043772773 | 0.955609729 |
| 64710  | NUCKS1 | Nuclear casein kinase and cyclin-dependent kinase substrate 1                 | 8.06077 | 7.95106 | 8.16921 | 7.64151 | 6.48254 | 7.63794 | -1.748781446 | -0.80635    | 1.748781446 | Down | 0.048238731 | 0.955609729 |
| 643752 | RAP1BL | RAP1B, member of RAS oncogene family pseudogene                               | 5.51884 | 4.59482 | 4.58076 | 4.40312 | 3.56146 | 4.28574 | -1.758932354 | -0.8147     | 1.758932354 | Down | 0.045776334 | 0.955609729 |
| 11126  | CD160  | CD160                                                                         | 3.897   | 3.685   | 4.441   | 4.964   | 4.469   | 5.034   | 1.7586153    | 0.81444     | 1.758615    | Up   | 0.013774    | 0.955609    |

|        |            |                                             |             |             |             |             |             |             |                  |                  |                 |      |                 |                 |
|--------|------------|---------------------------------------------|-------------|-------------|-------------|-------------|-------------|-------------|------------------|------------------|-----------------|------|-----------------|-----------------|
|        |            | molecule                                    | 43          | 23          | 82          | 35          | 11          | 34          | 91               |                  | 391             |      | 421             | 729             |
| 6863   | TAC1       | Tachykinin precursor 1                      | 7.923<br>99 | 7.912<br>41 | 8.434<br>53 | 7.630<br>59 | 6.560<br>68 | 6.755<br>05 | -2.1557701<br>03 | -1.10820<br>3333 | 2.155770<br>103 | Down | 0.011422<br>299 | 0.955609<br>729 |
| 8447   | DOC2 B     | Double C2-like domains, $\beta$             | 7.265<br>3  | 5.929<br>74 | 5.761<br>17 | 5.348<br>4  | 5.165<br>61 | 5.080<br>31 | -2.1744190<br>49 | -1.12063         | 2.174419<br>049 | Down | 0.026911<br>662 | 0.955609<br>729 |
| 23242  | COBL       | Cordon-bleu WH2 repeat protein              | 5.458<br>03 | 6.398<br>31 | 6.581<br>7  | 7.389<br>57 | 6.993<br>14 | 7.219<br>46 | 2.0773006<br>01  | 1.05471          | 2.077300<br>601 | Up   | 0.013558<br>969 | 0.955609<br>729 |
| 3680   | ITGA9      | Integrin $\alpha$ 9                         | 7.033<br>06 | 6.394<br>09 | 5.089<br>32 | 3.299<br>88 | 5.649<br>68 | 4.267<br>12 | -3.4025035<br>49 | -1.76659<br>6667 | 3.402503<br>549 | Down | 0.041225<br>075 | 0.955609<br>729 |
| 23600  | AMAC R     | Alpha-methylacyl-coa racemase               | 7.961<br>53 | 9.408<br>53 | 8.903<br>88 | 9.617<br>34 | 9.639<br>86 | 9.589<br>88 | 1.8121637<br>6   | 0.857713<br>333  | 1.812163<br>76  | Up   | 0.048433<br>898 | 0.955609<br>729 |
| 3012   | HIST1 H2AE | Histone cluster 1, h2ae                     | 5.570<br>32 | 5.572<br>15 | 5.558<br>59 | 7.052<br>72 | 6.189<br>56 | 6.334<br>86 | 1.9435488<br>01  | 0.958693<br>333  | 1.943548<br>801 | Up   | 0.006797<br>745 | 0.955609<br>729 |
| 654466 | KGFLP 2    | Keratinocyte growth factor-like protein 2   | 7.501<br>29 | 6.879<br>49 | 6.730<br>08 | 6.461<br>41 | 6.494<br>25 | 5.843<br>14 | -1.7060816<br>19 | -0.77068<br>6667 | 1.706081<br>619 | Down | 0.031197<br>641 | 0.955609<br>729 |
| 10231  | RCAN 2     | Regulator of calcineurin 2                  | 7.533<br>32 | 7.188<br>74 | 7.228<br>66 | 4.245<br>73 | 6.031<br>44 | 6.363<br>92 | -3.4102480<br>19 | -1.76987<br>6667 | 3.410248<br>019 | Down | 0.013865<br>655 | 0.955609<br>729 |
| 285343 | TCAI M     | T cell activation inhibitor, mitochondria 1 | 7.284<br>7  | 7.910<br>9  | 7.986<br>87 | 8.680<br>7  | 8.627<br>1  | 9.028<br>88 | 2.0725448<br>66  | 1.051403<br>333  | 2.072544<br>866 | Up   | 0.003841<br>267 | 0.955609<br>729 |
| 3249   | HPN        | Hepsin                                      | 8.084<br>85 | 9.214<br>15 | 8.249<br>24 | 9.511<br>53 | 9.389<br>48 | 9.331<br>14 | 1.8591416<br>14  | 0.894636<br>667  | 1.859141<br>614 | Up   | 0.024194<br>031 | 0.955609<br>729 |
| 2568   | GABR       | Gamma-ami                                   | 5.613       | 6.727       | 7.986       | 10.06       | 8.661       | 7.730       | 4.1186361        | 2.042166         | 4.118636        | Up   | 0.032541        | 0.955609        |



|           |        |                                                  |         |         |         |          |         |         |              |              |             |      |             |             |
|-----------|--------|--------------------------------------------------|---------|---------|---------|----------|---------|---------|--------------|--------------|-------------|------|-------------|-------------|
| 2568      | GABRP  | Gamma-aminobutyric acid (GABA) A receptor, pi    | 5.61357 | 6.72751 | 7.98656 | 10.06241 | 8.66135 | 7.73038 | 4.11863611   | 2.042166667  | 4.11863611  | Up   | 0.032541353 | 0.955609729 |
| 8544      | PIR    | Pirin                                            | 7.91557 | 7.61911 | 7.86825 | 6.802    | 7.29306 | 7.14695 | -1.647532205 | -0.720306667 | 1.647532205 | Down | 0.008381054 | 0.955609729 |
| 2115      | ETV1   | Ets variant 1                                    | 7.7653  | 8.87137 | 8.54641 | 9.41547  | 8.77998 | 9.3692  | 1.733702873  | 0.793856667  | 1.733702873 | Up   | 0.04874427  | 0.955609729 |
| 2230      | FDX1   | Ferredoxin 1                                     | 6.50231 | 6.85142 | 6.33267 | 7.51206  | 6.8406  | 7.08988 | 1.500434145  | 0.58538      | 1.500434145 | Up   | 0.045867303 | 0.955609729 |
| 114880    | OSBPL6 | Oxysterol binding protein like 6                 | 6.58653 | 7.49918 | 6.38885 | 7.79569  | 7.25704 | 8.69324 | 2.129433977  | 1.09047      | 2.129433977 | Up   | 0.044647603 | 0.955609729 |
| 53826     | FXYD6  | FXYD domain containing ion transport regulator 6 | 7.79421 | 6.94296 | 6.82305 | 4.41669  | 6.85592 | 5.85013 | -2.787863644 | -1.47916     | 2.787863644 | Down | 0.048251866 | 0.955609729 |
| 1909      | EDNRA  | Endothelin receptor type A                       | 7.99943 | 6.00156 | 5.70532 | 4.42795  | 5.72377 | 4.909   | -2.92518932  | -1.54853     | 2.92518932  | Down | 0.048830416 | 0.955609729 |
| 79814     | AGMAT  | Agmatinase                                       | 4.02117 | 4.92578 | 4.02589 | 5.19787  | 5.29075 | 4.84277 | 1.724506221  | 0.786183333  | 1.724506221 | Up   | 0.027315375 | 0.955609729 |
| 100130933 | SMIM6  | Small integral membrane protein 6                | 7.09196 | 8.54744 | 8.17215 | 9.06327  | 8.60094 | 9.03994 | 1.950981368  | 0.9642       | 1.950981368 | Up   | 0.041807891 | 0.955609729 |
| 2892      | GRIA3  | Glutamate receptor, ionotropic,                  | 3.08577 | 3.65936 | 3.19875 | 3.67821  | 4.1986  | 4.3831  | 1.707647265  | 0.77201      | 1.707647265 | Up   | 0.012880778 | 0.955609729 |

|       |              |                                                                                                         |              |              |              |              |              |              |                  |                  |                 |      |                 |                 |
|-------|--------------|---------------------------------------------------------------------------------------------------------|--------------|--------------|--------------|--------------|--------------|--------------|------------------|------------------|-----------------|------|-----------------|-----------------|
| 6785  | ELOV<br>L4   | ELOVL fatty<br>acid<br>elongase 4                                                                       | 4.994<br>89  | 4.234<br>17  | 4.426<br>11  | 3.799<br>42  | 4.209<br>58  | 3.763<br>32  | -1.5450105<br>26 | -0.62761<br>6667 | 1.545010<br>526 | Down | 0.031536<br>766 | 0.955609<br>729 |
| 1016  | CDH18        | Cadherin 18,<br>type 2                                                                                  | 3.282<br>66  | 3.648<br>47  | 3.573<br>81  | 3.845<br>75  | 5.278<br>44  | 4.592<br>9   | 2.1004765<br>31  | 1.070716<br>667  | 2.100476<br>531 | Up   | 0.018304<br>972 | 0.955609<br>729 |
| 11181 | TREH         | Trehalase                                                                                               | 6.117<br>71  | 6.902<br>28  | 6.036<br>77  | 7.398<br>66  | 7.591<br>45  | 7.459<br>68  | 2.1901201<br>22  | 1.13101<br>122   | 2.190120<br>122 | Up   | 0.003778<br>472 | 0.955609<br>729 |
| 7504  | XK           | X-linked Kx<br>blood group                                                                              | 4.318<br>87  | 5.140<br>45  | 5.362<br>58  | 5.369<br>2   | 5.773<br>34  | 5.881<br>36  | 1.6632441<br>97  | 0.734            | 1.663244<br>197 | Up   | 0.046828<br>081 | 0.955609<br>729 |
| 10166 | SLC25<br>A15 | Solute<br>carrier<br>family 25<br>(mitochondri<br>al carrier;<br>ornithine<br>transporter)<br>member 15 | 6.823<br>53  | 7.572<br>38  | 7.662<br>25  | 8.324<br>78  | 7.952<br>57  | 8.032<br>35  | 1.6823913<br>45  | 0.750513<br>333  | 1.682391<br>345 | Up   | 0.026569<br>751 | 0.955609<br>729 |
| 84790 | TUBA<br>1C   | Tubulin, $\alpha$ 1c                                                                                    | 10.28<br>378 | 10.78<br>814 | 10.76<br>163 | 11.38<br>938 | 11.34<br>549 | 10.98<br>621 | 1.5466820<br>64  | 0.629176<br>667  | 1.546682<br>064 | Up   | 0.019076<br>029 | 0.955609<br>729 |
| 26503 | SLC17<br>A5  | Solute<br>carrier<br>family 17<br>(acidic sugar<br>transporter),<br>member 5                            | 5.336<br>34  | 5.519<br>2   | 5.849<br>02  | 6.687<br>75  | 6.279<br>23  | 6.106<br>68  | 1.7287149<br>49  | 0.7897           | 1.728714<br>949 | Up   | 0.010363<br>395 | 0.955609<br>729 |
| 26020 | LRP10        | LDL<br>receptor<br>related<br>protein 10                                                                | 4.581<br>9   | 5.490<br>59  | 5.838<br>26  | 6.162<br>13  | 6.466<br>48  | 5.849<br>14  | 1.8095947<br>72  | 0.855666<br>667  | 1.809594<br>772 | Up   | 0.045124<br>676 | 0.955609<br>729 |
| 4907  | NT5E         | 5'-nucleotida<br>se, ecto                                                                               | 4.809<br>51  | 5.596<br>35  | 4.984<br>93  | 5.812<br>89  | 5.478<br>55  | 5.992        | 1.5485128<br>27  | 0.630883<br>333  | 1.548512<br>827 | Up   | 0.043420<br>17  | 0.955609<br>729 |

|        |         |                                                          |         |         |         |         |         |         |              |             |             |      |             |             |
|--------|---------|----------------------------------------------------------|---------|---------|---------|---------|---------|---------|--------------|-------------|-------------|------|-------------|-------------|
| 4907   | NT5E    | 5'-nucleotidase, ecto (CD73)                             | 4.80951 | 5.59635 | 4.98493 | 5.81289 | 5.47855 | 5.992   | 1.548512827  | 0.630883333 | 1.548512827 | Up   | 0.04342017  | 0.955609729 |
| 6932   | TCF7    | Transcription factor 7 (T-cell specific, HMG-box)        | 6.40992 | 5.62125 | 6.33267 | 5.47574 | 5.66028 | 5.35891 | -1.540042324 | -0.62297    | 1.540042324 | Down | 0.040790551 | 0.955609729 |
| 1838   | DTNB    | Dystrobrevin $\beta$                                     | 3.15089 | 3.87571 | 3.54628 | 4.4302  | 4.18564 | 3.8383  | 1.544443042  | 0.627086667 | 1.544443042 | Up   | 0.029957886 | 0.955609729 |
| 7586   | ZKSCAN1 | Zinc finger with KRAB and SCAN domains 1                 | 3.95243 | 5.13148 | 4.55017 | 6.19946 | 5.39242 | 5.6546  | 2.303988209  | 1.204133333 | 2.303988209 | Up   | 0.010795501 | 0.955609729 |
| 4603   | MYBL1   | V-myb avian myeloblastosis viral oncogene homolog-like 1 | 5.93296 | 5.41232 | 6.45441 | 5.03646 | 5.26138 | 5.42684 | -1.615152065 | -0.69167    | 1.615152065 | Down | 0.045311731 | 0.955609729 |
| 196446 | MYRF1   | Myelin regulatory factor-like                            | 5.3553  | 5.41971 | 5.69906 | 6.56001 | 6.8389  | 6.71565 | 2.318990109  | 1.213496667 | 2.318990109 | Up   | 0.00025394  | 0.955609729 |
| 5154   | PDGFA   | Platelet-derived growth factor $\alpha$ polypeptide      | 5.35197 | 6.28206 | 5.73869 | 7.80274 | 7.02977 | 6.2305  | 2.345827074  | 1.230096667 | 2.345827074 | Up   | 0.026097019 | 0.955609729 |
| 2324   | FLT4    | Fms-related                                              | 6.916   | 5.745   | 5.749   | 5.225   | 5.510   | 4.950   | -1.8763686   | -0.90794    | 1.876368    | Down | 0.038306    | 0.955609    |

Table SIII. DEGs in comparison III.

| Entry  | Gene symbol | Gene name                              | A10933  | A10934  | A10939  | A10958  | A10960  | A10963  | Fold change  | logFC        | absolute FC | Regulation | P-value     | FDR         |
|--------|-------------|----------------------------------------|---------|---------|---------|---------|---------|---------|--------------|--------------|-------------|------------|-------------|-------------|
| 28673  | TRAV12-2    | T cell receptor $\alpha$ variable 12-2 | 5.54752 | 5.20952 | 4.72877 | 4.42279 | 4.67467 | 4.56077 | -1.525406057 | -0.609193333 | 1.525406057 | Down       | 0.033582614 | 0.999940436 |
| 308    | ANXA5       | Annexin A5                             | 6.85555 | 6.75964 | 6.98778 | 7.98821 | 7.29296 | 7.38921 | 1.612318391  | 0.689136667  | 1.612318391 | Up         | 0.021117163 | 0.999940436 |
| 23705  | CADM1       | Cell adhesion molecule 1               | 5.99482 | 5.26995 | 5.82673 | 6.10244 | 7.37413 | 6.48282 | 1.907870611  | 0.931963333  | 1.907870611 | Up         | 0.04474464  | 0.999940436 |
| 3976   | LIF         | Leukemia inhibitory factor             | 6.35804 | 6.18455 | 6.77195 | 7.24651 | 7.68051 | 6.64502 | 1.684709682  | 0.7525       | 1.684709682 | Up         | 0.047431074 | 0.999940436 |
| 55125  | CEP192      | Centrosomal protein 192kda             | 7.60627 | 8.17279 | 7.42922 | 6.90334 | 6.64646 | 7.38164 | -1.685620775 | -0.75328     | 1.685620775 | Down       | 0.031942132 | 0.999940436 |
| 257019 | FRMD3       | FERM domain containing 3               | 4.57856 | 4.17422 | 4.00787 | 4.96956 | 4.94429 | 5.17729 | 1.720959723  | 0.783213333  | 1.720959723 | Up         | 0.00411477  | 0.999940436 |
| 130    | COL         | Collagen, type                         | 5.1     | 4.8     | 5.1     | 6.6     | 7.1     | 5.4     | 2.59         | 1.37         | 2.59        | Up         | 0.01        | 0.99        |

|           |                 |                                                                                              |                 |                 |                 |                 |                 |                 |                      |                      |                         |          |                         |                         |
|-----------|-----------------|----------------------------------------------------------------------------------------------|-----------------|-----------------|-----------------|-----------------|-----------------|-----------------|----------------------|----------------------|-------------------------|----------|-------------------------|-------------------------|
| 5         | 13A1            | XIII, $\alpha$ 1                                                                             | 52<br>14        | 73<br>01        | 15<br>02        | 47<br>65        | 58<br>09        | 58<br>84        | 3325<br>566          | 4803<br>333          | 332<br>556<br>6         |          | 627<br>856<br>6         | 994<br>043<br>6         |
| 634       | CEA<br>CAM<br>1 | Carcinoembryonic<br>antigen-related cell<br>adhesion molecule<br>1 (biliary<br>glycoprotein) | 5.3<br>16<br>62 | 5.2<br>04<br>05 | 5.7<br>88<br>18 | 6.6<br>05<br>74 | 6.1<br>12<br>19 | 5.8<br>99<br>18 | 1.70<br>4584<br>36   | 0.76<br>942          | 1.70<br>458<br>436      | Up       | 0.02<br>131<br>529<br>2 | 0.99<br>994<br>043<br>6 |
| 747<br>4  | WNT<br>5A       | Wingless-type<br>MMTV integration<br>site family member<br>5A                                | 5.3<br>46<br>78 | 4.8<br>27<br>17 | 5.3<br>83<br>79 | 6.3<br>94<br>54 | 5.7<br>89<br>42 | 5.9<br>38       | 1.80<br>8432<br>813  | 0.85<br>474          | 1.80<br>843<br>281<br>3 | Up       | 0.01<br>051<br>965<br>5 | 0.99<br>994<br>043<br>6 |
| 559<br>02 | ACS<br>S2       | Acyl-coa<br>synthetase<br>short-chain family<br>member 2                                     | 9.2<br>66<br>84 | 8.6<br>94<br>4  | 8.7<br>98<br>17 | 7.9<br>38<br>29 | 8.2<br>28<br>59 | 8.4<br>21<br>15 | -1.6<br>5151<br>8732 | -0.7<br>2379<br>3333 | 1.65<br>151<br>873<br>2 | Do<br>wn | 0.01<br>676<br>132<br>5 | 0.99<br>994<br>043<br>6 |
| 790<br>3  | ST8S<br>IA4     | ST8<br>$\alpha$ -N-acetyl-neurami<br>nide<br>$\alpha$ -2,8-sialyltransfer<br>ase 4           | 5.4<br>13<br>5  | 6.1<br>80<br>19 | 6.0<br>48<br>85 | 5.5<br>01<br>02 | 5.0<br>05<br>74 | 4.8<br>40<br>81 | -1.6<br>9935<br>8219 | -0.7<br>6499         | 1.69<br>935<br>821<br>9 | Do<br>wn | 0.02<br>975<br>076<br>1 | 0.99<br>994<br>043<br>6 |
| 190<br>6  | EDN<br>1        | Endothelin 1                                                                                 | 6.9<br>20<br>86 | 7.1<br>34<br>57 | 7.1<br>49<br>45 | 7.6<br>88<br>35 | 8.1<br>50<br>57 | 7.8<br>22<br>63 | 1.76<br>4048<br>223  | 0.81<br>889          | 1.76<br>404<br>822<br>3 | Up       | 0.00<br>384<br>072      | 0.99<br>994<br>043<br>6 |
| 692<br>6  | TBX<br>3        | T-box 3                                                                                      | 5.5<br>22<br>9  | 4.9<br>08<br>31 | 4.9<br>84<br>17 | 5.4<br>58<br>84 | 6.2<br>18<br>88 | 5.7<br>72<br>49 | 1.60<br>0227<br>104  | 0.67<br>8276<br>667  | 1.60<br>022<br>710<br>4 | Up       | 0.03<br>984<br>931<br>1 | 0.99<br>994<br>043<br>6 |

|     |      |                    |     |     |     |     |     |     |      |      |      |    |      |      |
|-----|------|--------------------|-----|-----|-----|-----|-----|-----|------|------|------|----|------|------|
| 604 | CDH  | Cadherin 26        | 3.9 | 3.8 | 4.5 | 3.4 | 3.7 | 3.2 | -1.5 | -0.6 | 1.54 | Do | 0.02 | 0.99 |
| 37  | 26   |                    | 45  | 72  | 61  | 25  | 82  | 74  | 4995 | 3222 | 995  | wn | 961  | 994  |
|     |      |                    | 49  | 61  | 44  | 56  | 89  | 42  | 178  | 3333 | 178  |    | 374  | 043  |
|     |      |                    |     |     |     |     |     |     |      |      |      |    | 9    | 6    |
| 318 | NUD  | Nudix hydrolase 2  | 5.3 | 5.5 | 5.9 | 6.3 | 6.2 | 6.1 | 1.55 | 0.63 | 1.55 | Up | 0.01 | 0.99 |
|     | T2   |                    | 22  | 73  | 09  | 10  | 86  | 13  | 2747 | 4823 | 274  |    | 555  | 994  |
|     |      |                    | 55  | 63  | 24  | 26  | 61  | 02  | 595  | 333  | 759  |    | 653  | 043  |
|     |      |                    |     |     |     |     |     |     |      |      | 5    |    | 3    | 6    |
| 101 | LOC  | Uncharacterized    | 3.5 | 3.8 | 3.7 | 4.2 | 4.2 | 4.5 | 1.52 | 0.60 | 1.52 | Up | 0.00 | 0.99 |
| 928 | 1019 | LOC101928168       | 52  | 90  | 80  | 32  | 36  | 65  | 0086 | 4153 | 008  |    | 574  | 994  |
| 168 | 2816 |                    | 12  | 41  | 03  | 62  | 85  | 55  | 407  | 333  | 640  |    | 270  | 043  |
|     | 8    |                    |     |     |     |     |     |     |      |      | 7    |    | 9    | 6    |
| 797 | MCT  | Multiple C2        | 4.3 | 5.2 | 4.5 | 6.8 | 6.6 | 4.9 | 2.67 | 1.41 | 2.67 | Up | 0.03 | 0.99 |
| 72  | P1   | domains,           | 93  | 96  | 34  | 59  | 66  | 49  | 0278 | 699  | 027  |    | 818  | 994  |
|     |      | transmembrane 1    | 19  | 44  | 71  | 12  | 34  | 85  | 098  |      | 809  |    | 239  | 043  |
|     |      |                    |     |     |     |     |     |     |      |      | 8    |    | 9    | 6    |
| 147 | C19o | Chromosome 19      | 5.2 | 5.3 | 4.6 | 3.9 | 4.1 | 4.8 | -1.6 | -0.7 | 1.67 | Do | 0.03 | 0.99 |
| 685 | rf18 | open reading frame | 01  | 08  | 43  | 26  | 77  | 09  | 7793 | 4669 | 793  | wn | 749  | 994  |
|     |      | 18                 | 57  | 55  | 24  | 11  | 57  | 61  | 8687 |      | 868  |    | 622  | 043  |
|     |      |                    |     |     |     |     |     |     |      |      | 7    |    | 3    | 6    |
| 573 | BAG  | BCL2 associated    | 5.5 | 6.5 | 5.7 | 6.6 | 6.6 | 6.7 | 1.60 | 0.68 | 1.60 | Up | 0.04 | 0.99 |
|     | 1    | athanogene 1       | 84  | 85  | 70  | 18  | 56  | 16  | 6305 | 3746 | 630  |    | 744  | 994  |
|     |      |                    | 28  | 49  | 47  | 77  | 03  | 68  | 906  | 667  | 590  |    | 886  | 043  |
|     |      |                    |     |     |     |     |     |     |      |      | 6    |    | 4    | 6    |
| 227 | FHL2 | Four and a half    | 7.6 | 7.8 | 8.3 | 9.2 | 8.5 | 8.5 | 1.77 | 0.82 | 1.77 | Up | 0.02 | 0.99 |
| 4   |      | LIM domains 2      | 90  | 69  | 56  | 98  | 46  | 47  | 1821 | 5233 | 182  |    | 689  | 994  |
|     |      |                    | 13  | 79  | 65  | 58  | 44  | 25  | 579  | 333  | 157  |    | 116  | 043  |
|     |      |                    |     |     |     |     |     |     |      |      | 9    |    |      | 6    |
| 100 | LOC  | Uncharacterized    | 9.2 | 8.4 | 9.6 | 9.7 | 9.7 | 10. | 1.77 | 0.82 | 1.77 | Up | 0.04 | 0.99 |

|     |      |                      |     |     |     |     |     |     |      |      |      |    |      |      |
|-----|------|----------------------|-----|-----|-----|-----|-----|-----|------|------|------|----|------|------|
| 507 | 1005 | LOC100507412         | 52  | 96  | 54  | 52  | 88  | 34  | 6441 | 899  | 644  |    | 706  | 994  |
| 412 | 0741 |                      | 2   | 9   | 94  | 49  | 74  | 97  | 278  |      | 127  |    | 996  | 043  |
|     | 2    |                      |     |     |     |     |     | 8   |      |      | 8    |    | 4    | 6    |
| 110 | KDE  | KDEL                 | 8.2 | 7.9 | 8.2 | 9.1 | 8.9 | 8.5 | 1.67 | 0.74 | 1.67 | Up | 0.01 | 0.99 |
| 15  | LR3  | (Lys-Asp-Glu-Leu)    | 87  | 52  | 23  | 54  | 76  | 67  | 5730 | 479  | 573  |    | 113  | 994  |
|     |      | endoplasmic          | 97  | 24  | 67  | 24  | 32  | 69  | 331  |      | 033  |    | 494  | 043  |
|     |      | reticulum protein    |     |     |     |     |     |     |      |      | 1    |    | 6    | 6    |
|     |      | retention receptor 3 |     |     |     |     |     |     |      |      |      |    |      |      |
| 552 | MCO  | Mucolipin 3          | 3.7 | 4.4 | 3.9 | 4.2 | 5.4 | 5.2 | 1.91 | 0.93 | 1.91 | Up | 0.03 | 0.99 |
| 83  | LN3  |                      | 96  | 69  | 29  | 55  | 77  | 80  | 7655 | 9343 | 765  |    | 664  | 994  |
|     |      |                      | 73  | 33  | 22  | 66  | 58  | 07  | 187  | 333  | 518  |    | 809  | 043  |
|     |      |                      |     |     |     |     |     |     |      |      | 7    |    | 3    | 6    |
| 140 | TCE  | Transcription        | 6.7 | 7.3 | 7.1 | 8.3 | 7.8 | 7.5 | 1.79 | 0.84 | 1.79 | Up | 0.02 | 0.99 |
| 597 | AL2  | elongation factor A  | 25  | 19  | 75  | 70  | 23  | 55  | 3888 | 309  | 388  |    | 021  | 994  |
|     |      | (SII)-like 2         | 42  | 49  | 66  | 96  | 6   | 28  | 224  |      | 822  |    | 502  | 043  |
|     |      |                      |     |     |     |     |     |     |      |      | 4    |    | 8    | 6    |
| 114 | OSB  | Oxysterol binding    | 7.3 | 7.5 | 7.8 | 8.3 | 8.2 | 8.0 | 1.53 | 0.61 | 1.53 | Up | 0.01 | 0.99 |
| 882 | PL8  | protein like 8       | 83  | 38  | 47  | 73  | 25  | 10  | 0030 | 356  | 003  |    | 800  | 994  |
|     |      |                      | 12  | 95  | 77  | 69  | 9   | 93  | 063  |      | 006  |    | 1112 | 043  |
|     |      |                      |     |     |     |     |     |     |      |      | 3    |    |      | 6    |
| 800 | PCN  | Pecanex-like 2       | 4.3 | 4.9 | 4.9 | 5.5 | 5.5 | 5.0 | 1.53 | 0.62 | 1.53 | Up | 0.03 | 0.99 |
| 03  | XL2  | (Drosophila)         | 47  | 32  | 78  | 52  | 16  | 57  | 9633 | 2586 | 963  |    | 581  | 994  |
|     |      |                      | 86  | 47  | 97  | 92  | 2   | 94  | 179  | 667  | 317  |    | 743  | 043  |
|     |      |                      |     |     |     |     |     |     |      |      | 9    |    | 2    | 6    |
| 798 | TFPI | Tissue factor        | 4.3 | 3.4 | 3.8 | 4.2 | 4.7 | 4.7 | 1.63 | 0.70 | 1.63 | Up | 0.03 | 0.99 |
| 0   | 2    | pathway inhibitor 2  | 45  | 50  | 79  | 86  | 44  | 71  | 4867 | 9173 | 486  |    | 129  | 994  |
|     |      |                      | 73  | 55  | 08  | 77  | 54  | 57  | 067  | 333  | 706  |    | 944  | 043  |
|     |      |                      |     |     |     |     |     |     |      |      | 7    |    | 4    | 6    |
| 904 | SPA  | Sperm associated     | 2.8 | 3.8 | 3.8 | 4.7 | 4.0 | 4.3 | 1.79 | 0.84 | 1.79 | Up | 0.03 | 0.99 |

|            |            |                                                                 |                 |                 |                 |                 |                 |                 |                      |                      |                         |          |                         |                         |
|------------|------------|-----------------------------------------------------------------|-----------------|-----------------|-----------------|-----------------|-----------------|-----------------|----------------------|----------------------|-------------------------|----------|-------------------------|-------------------------|
| 3          | G9         | antigen 9                                                       | 51<br>89        | 70<br>96        | 62<br>25        | 12<br>41        | 07<br>87        | 93<br>26        | 3544<br>242          | 2813<br>333          | 354<br>424              |          | 878<br>200<br>6         | 994<br>043<br>6         |
| 168<br>002 | DAC<br>T2  | Dishevelled-bindin<br>g antagonist of<br>β-catenin 2            | 5.5<br>32<br>49 | 6.3<br>24<br>72 | 5.5<br>08<br>67 | 4.8<br>32<br>13 | 4.9<br>29<br>9  | 5.3<br>41<br>85 | -1.6<br>8646<br>2221 | -0.7<br>54<br>222    | 1.68<br>646<br>222      | Do<br>wn | 0.03<br>155<br>591<br>3 | 0.99<br>994<br>043<br>6 |
| 133<br>383 | SET<br>D9  | SET domain<br>containing 9                                      | 3.9<br>23<br>58 | 2.8<br>32<br>3  | 3.7<br>30<br>56 | 4.6<br>30<br>78 | 4.0<br>03<br>73 | 4.2<br>04<br>29 | 1.72<br>2041<br>606  | 0.78<br>412<br>204   | 1.72<br>204<br>160<br>6 | Up       | 0.04<br>537<br>754<br>2 | 0.99<br>994<br>043<br>6 |
| 417<br>3   | MC<br>M4   | Minichromosome<br>maintenance<br>complex<br>component 4         | 3.6<br>68<br>1  | 4.2<br>56<br>5  | 4.1<br>64<br>31 | 5.2<br>17<br>09 | 5.3<br>21<br>5  | 4.2<br>63<br>53 | 1.87<br>1770<br>212  | 0.90<br>4403<br>333  | 1.87<br>177<br>021<br>2 | Up       | 0.02<br>813<br>533<br>4 | 0.99<br>994<br>043<br>6 |
| 690<br>9   | TBX<br>2   | T-box 2                                                         | 6.1<br>33<br>41 | 5.9<br>87<br>87 | 6.0<br>53<br>05 | 7.5<br>58<br>8  | 6.9<br>22<br>11 | 6.2<br>27<br>23 | 1.79<br>5770<br>934  | 0.84<br>4603<br>333  | 1.79<br>577<br>093<br>4 | Up       | 0.04<br>294<br>898<br>2 | 0.99<br>994<br>043<br>6 |
| 557<br>0   | PKIB       | Protein kinase<br>(camp-dependent,<br>catalytic) inhibitor<br>β | 4.2<br>73<br>81 | 4.5<br>65<br>17 | 4.4<br>57<br>43 | 5.4<br>95<br>96 | 5.1<br>35<br>11 | 4.7<br>98<br>81 | 1.63<br>7116<br>133  | 0.71<br>1156<br>667  | 1.63<br>711<br>613<br>3 | Up       | 0.01<br>195<br>321<br>4 | 0.99<br>994<br>043<br>6 |
| 904<br>27  | BMF        | Bcl2 modifying<br>factor                                        | 6.6<br>32<br>79 | 7.4<br>66<br>28 | 7.4<br>02<br>53 | 6.3<br>26<br>85 | 5.8<br>66<br>69 | 6.4<br>25<br>11 | -1.9<br>4663<br>626  | -0.9<br>6098<br>3333 | 1.94<br>663<br>626      | Do<br>wn | 0.01<br>404<br>994<br>2 | 0.99<br>994<br>043<br>6 |
| 953        | ENT<br>PD1 | Ectonucleoside<br>triphosphate                                  | 5.7<br>87       | 5.5<br>70       | 5.3<br>80       | 6.9<br>13       | 6.4<br>30       | 5.8<br>62       | 1.76<br>8455         | 0.82<br>249          | 1.76<br>845             | Up       | 0.02<br>765             | 0.99<br>994             |



|     |     |                      |     |     |     |     |     |     |      |      |      |    |      |      |
|-----|-----|----------------------|-----|-----|-----|-----|-----|-----|------|------|------|----|------|------|
|     |     | diphosphohydrolase 1 | 46  | 32  | 97  | 57  | 17  | 48  | 602  |      | 560  |    | 388  | 043  |
|     |     |                      |     |     |     |     |     |     |      |      | 2    |    | 8    | 6    |
| 331 | HSP | Heat shock protein   | 10. | 10. | 10. | 10. | 10. | 11. | 1.50 | 0.58 | 1.50 | Up | 0.03 | 0.99 |
| 2   | A8  | family A (Hsp70)     | 09  | 25  | 40  | 84  | 48  | 19  | 3560 | 8383 | 356  |    | 457  | 994  |
|     |     | member 8             | 61  | 72  | 63  | 69  | 64  | 14  | 931  | 333  | 093  |    | 618  | 043  |
|     |     |                      | 7   | 4   | 1   | 8   | 2   | 7   |      |      | 1    |    | 3    | 6    |
| 534 | PLG | Plasminogen-like     | 4.8 | 4.9 | 4.1 | 4.1 | 4.1 | 3.4 | -1.6 | -0.7 | 1.67 | Do | 0.03 | 0.99 |
| 2   | LB2 | B2                   | 45  | 22  | 60  | 80  | 00  | 03  | 7907 | 4766 | 907  | wn | 981  | 994  |
|     |     |                      | 56  | 27  | 09  | 8   | 89  | 24  | 1113 | 3333 | 1113 |    | 101  | 043  |
|     |     |                      |     |     |     |     |     |     |      |      |      |    | 6    | 6    |
| 491 | NTR | Neurotrophic         | 4.5 | 3.7 | 4.1 | 3.4 | 3.8 | 3.2 | -1.5 | -0.6 | 1.53 | Do | 0.03 | 0.99 |
| 6   | K3  | tyrosine kinase,     | 54  | 37  | 39  | 68  | 09  | 92  | 3749 | 2058 | 749  | wn | 800  | 994  |
|     |     | receptor, type 3     | 86  | 36  | 65  | 15  | 04  | 94  | 3168 |      | 316  |    | 194  | 043  |
|     |     |                      |     |     |     |     |     |     |      |      | 8    |    | 7    | 6    |
| 848 | AIF | Apoptosis inducing   | 8.2 | 7.5 | 7.4 | 6.9 | 6.8 | 7.0 | -1.6 | -0.7 | 1.68 | Do | 0.01 | 0.99 |
| 83  | M2  | factor,              | 43  | 44  | 50  | 96  | 99  | 79  | 8717 | 5461 | 717  | wn | 997  | 994  |
|     |     | mitochondria         | 8   | 58  | 89  | 37  | 89  | 17  | 9339 | 3333 | 933  |    | 621  | 043  |
|     |     | associated 2         |     |     |     |     |     |     |      |      | 9    |    | 7    | 6    |
| 534 | PLG | Plasminogen-like     | 4.8 | 4.9 | 4.1 | 4.1 | 4.1 | 3.4 | -1.6 | -0.7 | 1.67 | Do | 0.03 | 0.99 |
| 3   | LB1 | B1                   | 45  | 22  | 60  | 80  | 00  | 03  | 7907 | 4766 | 907  | wn | 981  | 994  |
|     |     |                      | 56  | 27  | 09  | 8   | 89  | 24  | 1113 | 3333 | 1113 |    | 101  | 043  |
|     |     |                      |     |     |     |     |     |     |      |      |      |    | 6    | 6    |
| 105 | SCG | Secretagoin,         | 4.0 | 4.1 | 4.4 | 6.8 | 6.4 | 5.4 | 4.01 | 2.00 | 4.01 | Up | 0.00 | 0.99 |
| 90  | N   | EF-hand calcium      | 68  | 62  | 84  | 25  | 40  | 62  | 3293 | 4786 | 329  |    | 110  | 994  |
|     |     | binding protein      | 46  | 28  | 17  | 67  | 91  | 69  | 499  | 667  | 349  |    | 911  | 043  |
|     |     |                      |     |     |     |     |     |     |      |      | 9    |    | 2    | 6    |
| 126 | NR2 | Nuclear receptor     | 5.7 | 5.7 | 6.3 | 6.8 | 6.5 | 6.4 | 1.57 | 0.65 | 1.57 | Up | 0.02 | 0.99 |
| 382 | C2A | 2C2-associated       | 41  | 99  | 58  | 17  | 41  | 96  | 1559 | 2196 | 155  |    | 358  | 994  |
|     | P   | protein              | 54  | 17  | 39  | 32  | 89  | 48  | 252  | 667  | 925  |    | 947  | 043  |

|            |                 |                                                                          |                      |                 |                 |                 |                 |                 |                      |                      |                         |          |                         |                         |
|------------|-----------------|--------------------------------------------------------------------------|----------------------|-----------------|-----------------|-----------------|-----------------|-----------------|----------------------|----------------------|-------------------------|----------|-------------------------|-------------------------|
|            |                 |                                                                          |                      |                 |                 |                 |                 |                 |                      |                      | 2                       |          | 7                       | 6                       |
| 729<br>857 | RGP<br>D2       | RANBP2-like and<br>GRIP domain<br>containing 2                           | 4.4<br>50<br>43      | 3.9<br>64<br>59 | 4.5<br>05<br>05 | 4.7<br>90<br>7  | 5.5<br>16<br>2  | 4.9<br>36<br>9  | 1.71<br>0688<br>007  | 0.77<br>4576<br>667  | 1.71<br>068<br>800      | Up       | 0.01<br>839<br>120      | 0.99<br>994<br>043      |
| 520<br>9   | PFKF<br>B3      | 6-phosphofructo-2-<br>kinase/fructose-2,6-<br>biphosphatase 3            | 11.<br>38<br>39<br>3 | 9.8<br>90<br>92 | 10.<br>41<br>03 | 8.8<br>17<br>03 | 9.8<br>58<br>01 | 9.6<br>65<br>15 | -2.1<br>6593<br>0074 | -1.11<br>4986<br>667 | 2.16<br>593<br>007<br>4 | Do<br>wn | 0.04<br>548<br>468<br>4 | 0.99<br>994<br>043<br>6 |
| 799<br>66  | SCD<br>5        | Stearoyl-coa<br>desaturase 5                                             | 7.2<br>09<br>26      | 5.9<br>26<br>25 | 5.8<br>94<br>34 | 7.8<br>90<br>6  | 7.8<br>29<br>83 | 7.0<br>98<br>39 | 2.39<br>9926<br>13   | 1.26<br>299<br>613   | 2.39<br>992<br>613      | Up       | 0.02<br>229<br>036<br>2 | 0.99<br>994<br>043<br>6 |
| 639<br>23  | TNN             | Tenascin N                                                               | 3.7<br>86<br>97      | 4.4<br>00<br>4  | 4.0<br>39<br>33 | 6.0<br>54<br>92 | 4.4<br>90<br>33 | 4.8<br>53<br>31 | 2.08<br>1013<br>994  | 1.05<br>7286<br>667  | 2.08<br>101<br>399<br>4 | Up       | 0.04<br>087<br>388<br>9 | 0.99<br>994<br>043<br>6 |
| 658<br>1   | SLC2<br>2A3     | Solute carrier<br>family 22 (organic<br>cation transporter),<br>member 3 | 7.3<br>45<br>97      | 7.6<br>26<br>27 | 6.9<br>28<br>02 | 5.8<br>19<br>2  | 6.6<br>12<br>56 | 6.9<br>77<br>34 | -1.7<br>7816<br>1876 | -0.8<br>3038<br>6667 | 1.77<br>816<br>187<br>6 | Do<br>wn | 0.04<br>961<br>496<br>7 | 0.99<br>994<br>043<br>6 |
| 913        | CD1<br>E        | CD1e molecule                                                            | 4.3<br>83<br>04      | 5.0<br>46<br>94 | 4.8<br>08<br>97 | 5.9<br>70<br>49 | 5.7<br>24<br>05 | 5.2<br>54<br>3  | 1.87<br>0334<br>96   | 0.90<br>3296<br>667  | 1.87<br>033<br>496      | Up       | 0.01<br>115<br>411<br>6 | 0.99<br>994<br>043<br>6 |
| 817<br>4   | MAD<br>CAM<br>1 | Mucosal vascular<br>addressin cell<br>adhesion molecule<br>1             | 6.0<br>98<br>66      | 6.3<br>92<br>44 | 6.7<br>98<br>21 | 7.6<br>44<br>92 | 9.0<br>19<br>16 | 6.8<br>55<br>12 | 2.65<br>7304<br>091  | 1.40<br>9963<br>333  | 2.65<br>730<br>409<br>1 | Up       | 0.03<br>883<br>353<br>9 | 0.99<br>994<br>043<br>6 |



|            |            |                                                     |                 |                 |                 |                 |                 |                 |                      |                      |                         |          |                         |                         |
|------------|------------|-----------------------------------------------------|-----------------|-----------------|-----------------|-----------------|-----------------|-----------------|----------------------|----------------------|-------------------------|----------|-------------------------|-------------------------|
| 799<br>60  | JAD<br>E1  | Jade family PHD<br>finger 1                         | 8.3<br>89<br>18 | 8.1<br>89<br>89 | 8.1<br>83<br>3  | 9.2<br>23<br>05 | 9.1<br>78<br>69 | 8.4<br>04<br>85 | 1.60<br>3702<br>647  | 0.68<br>1406<br>667  | 1.60<br>370<br>264<br>7 | Up       | 0.03<br>577<br>081<br>3 | 0.99<br>994<br>043<br>6 |
| 623<br>4   | RPS2<br>8  | Ribosomal protein<br>S28                            | 6.5<br>05       | 5.8<br>78<br>66 | 6.1<br>30<br>96 | 7.2<br>41<br>16 | 6.8<br>07<br>41 | 6.6<br>85<br>82 | 1.67<br>0087<br>086  | 0.73<br>9923<br>333  | 1.67<br>008<br>708<br>6 | Up       | 0.01<br>956<br>437      | 0.99<br>994<br>043<br>6 |
| 485<br>7   | NOV<br>A1  | Neuro-oncological<br>ventral antigen 1              | 7.5<br>03<br>35 | 7.1<br>23<br>38 | 7.4<br>92<br>87 | 5.7<br>20<br>48 | 6.5<br>45<br>88 | 6.8<br>92<br>08 | -1.9<br>8213<br>24   | -0.9<br>8705<br>3333 | 1.98<br>213<br>24       | Do<br>wn | 0.02<br>070<br>770<br>3 | 0.99<br>994<br>043<br>6 |
| 419<br>9   | ME1        | Malic enzyme 1,<br>NADP(+)-depende<br>nt, cytosolic | 7.7<br>55<br>63 | 7.5<br>88<br>23 | 7.8<br>82<br>55 | 6.4<br>01<br>91 | 7.0<br>43<br>88 | 7.4<br>46<br>14 | -1.7<br>1494<br>2256 | -0.7<br>7816         | 1.71<br>494<br>225<br>6 | Do<br>wn | 0.03<br>238<br>953<br>3 | 0.99<br>994<br>043<br>6 |
| 653<br>489 | RGP<br>D3  | RANBP2-like and<br>GRIP domain<br>containing 3      | 4.4<br>50<br>43 | 3.9<br>64<br>59 | 4.5<br>05<br>05 | 4.7<br>90<br>7  | 5.5<br>16<br>2  | 4.9<br>36<br>9  | 1.71<br>0688<br>007  | 0.77<br>4576<br>667  | 1.71<br>068<br>800<br>7 | Up       | 0.01<br>839<br>120<br>2 | 0.99<br>994<br>043<br>6 |
| 568<br>92  | C8orf<br>4 | Chromosome 8<br>open reading frame<br>4             | 8.1<br>18<br>15 | 7.3<br>01<br>55 | 7.2<br>93<br>07 | 8.5<br>20<br>94 | 9.7<br>24<br>17 | 8.1<br>89<br>64 | 2.36<br>3066<br>124  | 1.24<br>066          | 2.36<br>306<br>612<br>4 | Up       | 0.03<br>094<br>809<br>3 | 0.99<br>994<br>043<br>6 |
| 907<br>6   | CLD<br>N1  | Claudin 1                                           | 8.7<br>70<br>74 | 9.0<br>97<br>95 | 9.2<br>16<br>38 | 10.<br>13<br>66 | 9.7<br>81<br>62 | 9.2<br>04<br>71 | 1.60<br>1347<br>781  | 0.67<br>9286<br>667  | 1.60<br>134<br>778<br>1 | Up       | 0.04<br>628<br>357      | 0.99<br>994<br>043<br>6 |
| 574        | C3orf      | Chromosome 3                                        | 6.6             | 6.3             | 7.0             | 7.5             | 7.5             | 7.2             | 1.74                 | 0.80                 | 1.74                    | Up       | 0.01                    | 0.99                    |

|           |             |                                                         |                 |                 |                      |                      |                      |                      |                      |                      |                         |          |                         |                         |
|-----------|-------------|---------------------------------------------------------|-----------------|-----------------|----------------------|----------------------|----------------------|----------------------|----------------------|----------------------|-------------------------|----------|-------------------------|-------------------------|
| 15        | 14          | open reading frame<br>14                                | 29<br>05        | 33<br>45        | 13<br>82             | 84<br>03             | 74<br>78             | 39<br>34             | 9905<br>078          | 7276<br>667          | 990<br>507<br>8         |          | 071<br>178<br>3         | 994<br>043<br>6         |
| 816<br>71 | VMP<br>1    | Vacuole membrane<br>protein 1                           | 8.7<br>99<br>5  | 8.8<br>76<br>39 | 10.<br>00<br>35<br>5 | 10.<br>38<br>81<br>2 | 10.<br>91<br>15<br>6 | 10.<br>08<br>67<br>4 | 2.35<br>4890<br>537  | 1.23<br>566          | 2.35<br>489<br>053<br>7 | Up       | 0.01<br>719<br>173<br>6 | 0.99<br>994<br>043<br>6 |
| 619<br>6  | RPS6<br>KA2 | Ribosomal protein<br>S6 kinase, 90kda,<br>polypeptide 2 | 7.9<br>38<br>19 | 7.1<br>81<br>31 | 7.6<br>49<br>38      | 8.4<br>83<br>35      | 8.4<br>21<br>46      | 8.0<br>09<br>24      | 1.64<br>1547<br>694  | 0.71<br>5056<br>667  | 1.64<br>154<br>769<br>4 | Up       | 0.02<br>769<br>559<br>3 | 0.99<br>994<br>043<br>6 |
| 798<br>19 | WDR<br>78   | WD repeat domain<br>78                                  | 4.9<br>85<br>36 | 5.7<br>83<br>93 | 5.3<br>85<br>62      | 4.7<br>00<br>66      | 4.5<br>68<br>76      | 4.9<br>09<br>76      | -1.5<br>7852<br>4515 | -0.6<br>5857<br>6667 | 1.57<br>852<br>451<br>5 | Do<br>wn | 0.02<br>673<br>188<br>4 | 0.99<br>994<br>043<br>6 |
| 573<br>2  | PTG<br>ER2  | Prostaglandin E<br>receptor 2                           | 4.7<br>70<br>91 | 4.0<br>86<br>22 | 4.3<br>70<br>29      | 5.5<br>91<br>36      | 5.5<br>21<br>94      | 5.0<br>06<br>25      | 1.95<br>0769<br>516  | 0.96<br>4043<br>333  | 1.95<br>076<br>951<br>6 | Up       | 0.00<br>640<br>231<br>7 | 0.99<br>994<br>043<br>6 |
| 789<br>89 | COL<br>EC11 | Collectin subfamily<br>member 11                        | 8.5<br>64<br>26 | 8.5<br>35<br>43 | 8.3<br>98<br>77      | 9.7<br>14<br>52      | 9.3<br>70<br>69      | 9.5<br>56<br>14      | 2.06<br>7131<br>259  | 1.04<br>763          | 2.06<br>713<br>125<br>9 | Up       | 0.00<br>051<br>820<br>3 | 0.99<br>994<br>043<br>6 |
| 558<br>16 | DOK<br>5    | Docking protein 5                                       | 6.0<br>28<br>58 | 5.6<br>83<br>84 | 6.4<br>45<br>55      | 7.6<br>88<br>38      | 6.6<br>89<br>35      | 7.2<br>98<br>66      | 2.25<br>4498<br>682  | 1.17<br>2806<br>667  | 2.25<br>449<br>868<br>2 | Up       | 0.00<br>936<br>925<br>7 | 0.99<br>994<br>043<br>6 |
| 315<br>8  | HMG<br>CS2  | 3-hydroxy-3-methy<br>lglutaryl-coa                      | 8.4<br>01       | 7.0<br>95       | 6.4<br>22            | 9.6<br>99            | 9.4<br>40            | 9.5<br>19            | 4.74<br>6431         | 2.24<br>6843         | 4.74<br>643             | Up       | 0.00<br>302             | 0.99<br>994             |

|            |            |                                                                             |                      |                 |                 |                 |                 |                 |                      |                      |                    |          |                         |                         |
|------------|------------|-----------------------------------------------------------------------------|----------------------|-----------------|-----------------|-----------------|-----------------|-----------------|----------------------|----------------------|--------------------|----------|-------------------------|-------------------------|
|            |            | synthase<br>(mitochondrial)                                                 | 2<br>62              | 11<br>11        | 48<br>48        | 22<br>22        | 74<br>74        | 78<br>78        | 733<br>733           | 333<br>333           | 173<br>173         |          | 320<br>320              | 043<br>043              |
| 109<br>13  | EDA<br>R   | Ectodysplasin<br>receptor                                                   | A<br>5.1<br>47<br>81 | 5.5<br>38<br>06 | 5.8<br>29<br>22 | 6.4<br>07<br>66 | 6.3<br>85<br>51 | 5.9<br>53<br>36 | 1.67<br>4596<br>289  | 0.74<br>3813<br>333  | 1.67<br>459<br>628 | Up<br>3  | 0.01<br>783<br>499<br>2 | 0.99<br>994<br>043<br>6 |
| 631<br>9   | SCD        | Stearoyl-coa<br>desaturase<br>( $\Delta$ -9-desaturase)                     | 5.3<br>87<br>35      | 4.4<br>12<br>05 | 5.3<br>70<br>92 | 4.0<br>60<br>2  | 4.0<br>59<br>1  | 4.6<br>38<br>72 | -1.7<br>4605<br>6205 | -0.8<br>041<br>620   | 1.74<br>605<br>620 | Do<br>wn | 0.04<br>147<br>651<br>5 | 0.99<br>994<br>043<br>6 |
| 388        | RHO<br>B   | Ras homolog<br>family member B                                              | 6.8<br>57<br>12      | 6.6<br>34<br>94 | 6.9<br>57<br>88 | 7.1<br>84<br>19 | 7.9<br>78<br>85 | 7.4<br>00<br>19 | 1.62<br>9500<br>732  | 0.70<br>443<br>950   | 1.62<br>950<br>073 | Up<br>2  | 0.02<br>631<br>392      | 0.99<br>994<br>043<br>6 |
| 162<br>514 | TRP<br>V3  | Transient receptor<br>potential cation<br>channel, subfamily<br>V, member 3 | 7.1<br>06<br>38      | 7.0<br>66<br>24 | 6.5<br>70<br>59 | 5.4<br>20<br>38 | 6.2<br>40<br>15 | 5.9<br>83<br>47 | -2.0<br>4637<br>4228 | -1.0<br>3307<br>422  | 2.04<br>637<br>422 | Do<br>wn | 0.00<br>793<br>028<br>8 | 0.99<br>994<br>043<br>6 |
| 572<br>7   | PTC<br>H1  | Patched 1                                                                   | 8.1<br>71<br>78      | 8.1<br>91<br>61 | 7.9<br>85<br>4  | 9.8<br>23<br>26 | 8.8<br>42<br>61 | 8.7<br>06<br>81 | 2.01<br>1070<br>048  | 1.00<br>7963<br>333  | 2.01<br>107<br>004 | Up<br>8  | 0.01<br>708<br>523<br>5 | 0.99<br>994<br>043<br>6 |
| 259<br>04  | CNO<br>T10 | CCR4-NOT<br>transcription<br>complex subunit 10                             | 3.2<br>82<br>62      | 3.4<br>34<br>07 | 3.7<br>76<br>54 | 4.3<br>83<br>04 | 3.9<br>30<br>56 | 3.9<br>46<br>01 | 1.50<br>3988<br>289  | 0.58<br>8793<br>333  | 1.50<br>398<br>828 | Up<br>9  | 0.01<br>752<br>652<br>7 | 0.99<br>994<br>043<br>6 |
| 201<br>8   | EMX<br>2   | Empty spiracles<br>homeobox 2                                               | 6.6<br>72<br>1       | 7.6<br>58<br>53 | 5.2<br>55<br>12 | 3.9<br>57<br>33 | 4.4<br>71<br>95 | 5.5<br>92<br>92 | -3.6<br>1630<br>5768 | -1.8<br>5451<br>6667 | 3.61<br>630<br>576 | Do<br>wn | 0.03<br>295<br>859      | 0.99<br>994<br>043      |

|     |       |                     |     |     |     |     |     |     |      |      |      |    |      |      |
|-----|-------|---------------------|-----|-----|-----|-----|-----|-----|------|------|------|----|------|------|
|     |       |                     |     |     |     |     |     |     |      |      | 8    |    | 6    | 6    |
| 793 | BHL   | Basic               | 6.1 | 6.4 | 6.6 | 7.5 | 6.8 | 6.9 | 1.61 | 0.68 | 1.61 | Up | 0.02 | 0.99 |
| 65  | HE41  | helix-loop-helix    | 78  | 36  | 6   | 07  | 47  | 86  | 1752 | 863  | 175  |    | 535  | 994  |
|     |       | family member e41   | 46  | 38  |     | 62  | 03  | 08  | 253  |      | 225  |    | 026  | 043  |
|     |       |                     |     |     |     |     |     |     |      |      | 3    |    |      | 6    |
| 440 | C1orf | Chromosome 1        | 5.8 | 6.4 | 6.1 | 6.9 | 8.1 | 6.6 | 2.16 | 1.11 | 2.16 | Up | 0.03 | 0.99 |
| 712 | 186   | open reading frame  | 58  | 45  | 59  | 25  | 92  | 89  | 5574 | 475  | 557  |    | 457  | 994  |
|     |       | 186                 | 53  | 53  | 25  | 56  | 61  | 39  | 793  |      | 479  |    | 555  | 043  |
|     |       |                     |     |     |     |     |     |     |      |      | 3    |    | 5    | 6    |
| 110 | STM   | Stathmin 2          | 4.5 | 3.4 | 3.0 | 5.9 | 7.1 | 4.4 | 4.54 | 2.18 | 4.54 | Up | 0.02 | 0.99 |
| 75  | N2    |                     | 07  | 64  | 33  | 05  | 79  | 75  | 5555 | 4456 | 555  |    | 100  | 994  |
|     |       |                     | 65  | 67  | 75  | 2   | 22  | 02  | 669  | 667  | 566  |    | 243  | 043  |
|     |       |                     |     |     |     |     |     |     |      |      | 9    |    | 6    | 6    |
| 211 | ETS2  | V-ets avian         | 7.6 | 7.0 | 7.4 | 8.1 | 8.4 | 7.6 | 1.59 | 0.67 | 1.59 | Up | 0.04 | 0.99 |
| 4   |       | erythroblastosis    | 83  | 49  | 40  | 18  | 46  | 30  | 5483 | 3993 | 548  |    | 746  | 994  |
|     |       | virus E26 oncogene  | 47  | 82  | 05  | 08  | 98  | 26  | 107  | 333  | 310  |    | 425  | 043  |
|     |       | homolog 2           |     |     |     |     |     |     |      |      | 7    |    | 1    | 6    |
| 946 | HAN   | Heart and neural    | 5.2 | 5.2 | 5.3 | 6.7 | 6.3 | 5.4 | 1.84 | 0.88 | 1.84 | Up | 0.03 | 0.99 |
| 4   | D2    | crest derivatives   | 76  | 68  | 45  | 38  | 31  | 62  | 0987 | 048  | 098  |    | 314  | 994  |
|     |       | expressed 2         | 97  | 44  | 83  | 9   | 09  | 69  | 716  |      | 771  |    | 142  | 043  |
|     |       |                     |     |     |     |     |     |     |      |      | 6    |    | 2    | 6    |
| 377 | KCN   | Potassium channel,  | 7.1 | 8.1 | 8.3 | 9.0 | 8.8 | 8.6 | 1.97 | 0.98 | 1.97 | Up | 0.02 | 0.99 |
| 5   | K1    | two pore domain     | 67  | 14  | 17  | 76  | 69  | 01  | 5890 | 2503 | 589  |    | 327  | 994  |
|     |       | subfamily K,        | 67  | 4   | 9   | 49  | 24  | 75  | 96   | 333  | 096  |    | 995  | 043  |
|     |       | member 1            |     |     |     |     |     |     |      |      |      |    | 2    | 6    |
| 113 | CHR   | Cholinergic         | 3.3 | 3.3 | 3.6 | 4.1 | 4.9 | 3.7 | 1.78 | 0.83 | 1.78 | Up | 0.03 | 0.99 |
| 6   | NA3   | receptor, nicotinic | 43  | 08  | 77  | 59  | 32  | 48  | 6348 | 7013 | 634  |    | 061  | 994  |
|     |       | $\alpha$ 3          | 1   | 7   | 93  | 53  | 37  | 87  | 214  | 333  | 821  |    | 235  | 043  |
|     |       |                     |     |     |     |     |     |     |      |      | 4    |    | 5    | 6    |

|     |      |                                    |     |     |     |     |     |     |      |      |      |    |      |      |
|-----|------|------------------------------------|-----|-----|-----|-----|-----|-----|------|------|------|----|------|------|
| 836 | MS4  | Membrane-spanning                  | 6.1 | 7.3 | 6.9 | 8.9 | 7.5 | 8.0 | 2.59 | 1.37 | 2.59 | Up | 0.02 | 0.99 |
| 61  | A8   | g 4-domains, subfamily A, member 8 | 40  | 43  | 72  | 98  | 62  | 22  | 5057 | 5766 | 505  |    | 242  | 994  |
|     |      |                                    | 81  | 54  | 55  | 88  | 38  | 94  | 79   | 667  | 779  |    | 577  | 043  |
|     |      |                                    |     |     |     |     |     |     |      |      |      |    | 2    | 6    |
| 135 | CPA3 | Carboxypeptidase                   | 8.1 | 7.9 | 7.1 | 9.1 | 8.3 | 8.7 | 1.99 | 0.99 | 1.99 | Up | 0.02 | 0.99 |
| 9   |      | A3 (mast cell)                     | 78  | 35  | 84  | 81  | 77  | 22  | 2477 | 4563 | 247  |    | 200  | 994  |
|     |      |                                    | 32  | 36  | 43  | 95  | 53  | 32  | 363  | 333  | 736  |    | 227  | 043  |
|     |      |                                    |     |     |     |     |     |     |      |      | 3    |    | 2    | 6    |
| 717 | TPM  | Tropomyosin 4                      | 6.6 | 6.8 | 7.3 | 9.0 | 7.8 | 7.8 | 2.49 | 1.31 | 2.49 | Up | 0.01 | 0.99 |
| 1   | 4    |                                    | 04  | 73  | 58  | 40  | 52  | 97  | 2787 | 776  | 278  |    | 208  | 994  |
|     |      |                                    | 7   | 84  | 04  | 23  | 59  | 04  | 666  |      | 766  |    | 776  | 043  |
|     |      |                                    |     |     |     |     |     |     |      |      | 6    |    | 5    | 6    |
| 417 | MC   | Minichromosome                     | 3.6 | 3.9 | 4.3 | 4.9 | 5.1 | 4.4 | 1.82 | 0.86 | 1.82 | Up | 0.01 | 0.99 |
| 1   | M2   | maintenance                        | 91  | 46  | 38  | 47  | 78  | 55  | 5713 | 846  | 571  |    | 128  | 994  |
|     |      | complex                            | 21  | 28  | 69  | 17  | 96  | 43  | 009  |      | 300  |    | 140  | 043  |
|     |      | component 2                        |     |     |     |     |     |     |      |      | 9    |    | 8    | 6    |
| 253 | RICT | RPTOR                              | 3.9 | 4.4 | 4.7 | 3.5 | 3.7 | 3.8 | -1.5 | -0.6 | 1.59 | Do | 0.02 | 0.99 |
| 260 | OR   | independent                        | 38  | 09  | 74  | 37  | 25  | 43  | 9345 | 7216 | 345  | wn | 196  | 994  |
|     |      | companion of                       | 57  | 25  | 67  | 23  | 7   | 08  | 6903 |      | 690  |    | 053  | 043  |
|     |      | MTOR, complex 2                    |     |     |     |     |     |     |      |      | 3    |    | 5    | 6    |
| 102 | MSL  | Mesothelin                         | 9.4 | 6.9 | 7.1 | 10. | 9.6 | 9.8 | 4.24 | 2.08 | 4.24 | Up | 0.01 | 0.99 |
| 32  | N    |                                    | 75  | 55  | 96  | 39  | 89  | 01  | 1986 | 474  | 198  |    | 958  | 994  |
|     |      |                                    | 93  | 8   | 85  | 21  | 09  | 56  | 413  |      | 641  |    | 899  | 043  |
|     |      |                                    |     |     |     | 5   |     |     |      |      | 3    |    | 4    | 6    |
| 205 | EPH  | Epoxide hydrolase                  | 8.7 | 8.7 | 8.6 | 7.0 | 8.0 | 8.2 | -1.9 | -0.9 | 1.90 | Do | 0.03 | 0.99 |
| 2   | X1   | 1, microsomal                      | 82  | 33  | 20  | 34  | 33  | 84  | 0231 | 2775 | 231  | wn | 024  | 994  |
|     |      | (xenobiotic)                       | 49  | 39  | 6   | 96  | 96  | 3   | 1275 | 3333 | 127  |    | 646  | 043  |
|     |      |                                    |     |     |     |     |     |     |      |      | 5    |    |      | 6    |
| 841 | SLIT | SLIT and NTRK                      | 3.9 | 5.0 | 4.4 | 6.0 | 5.9 | 5.2 | 2.41 | 1.27 | 2.41 | Up | 0.00 | 0.99 |



|            |           |                                                |                 |                 |                 |                 |                 |                 |                     |                     |                         |    |                         |                         |
|------------|-----------|------------------------------------------------|-----------------|-----------------|-----------------|-----------------|-----------------|-----------------|---------------------|---------------------|-------------------------|----|-------------------------|-------------------------|
| 89         | RK6       | like family member<br>6                        | 63<br>66        | 13<br>67        | 54<br>15        | 31<br>49        | 82<br>95        | 41<br>89        | 9904<br>309         | 495                 | 990<br>430<br>9         |    | 795<br>743<br>9         | 994<br>043<br>6         |
| 360<br>6   | IL18      | Interleukin 18                                 | 4.1<br>15<br>8  | 5.7<br>68<br>01 | 5.2<br>63<br>87 | 7.2<br>13<br>38 | 6.4<br>94<br>99 | 5.8<br>02<br>84 | 2.74<br>0634<br>617 | 1.45<br>451         | 2.74<br>063<br>461<br>7 | Up | 0.02<br>938<br>843<br>3 | 0.99<br>994<br>043<br>6 |
| 510<br>66  | SSU<br>H2 | Ssu-2 homolog ( <i>C. Elegans</i> )            | 4.7<br>12<br>15 | 5.1<br>63<br>49 | 4.8<br>98<br>04 | 5.0<br>63<br>83 | 5.8<br>25<br>74 | 6.0<br>46<br>59 | 1.64<br>8126<br>143 | 0.72<br>0826        | 1.64<br>812<br>614<br>3 | Up | 0.04<br>211<br>211      | 0.99<br>994<br>043<br>6 |
| 400<br>966 | RGP<br>D1 | RANBP2-like and<br>GRIP domain<br>containing 1 | 4.4<br>50<br>43 | 3.9<br>64<br>59 | 4.5<br>05<br>05 | 4.7<br>90<br>7  | 5.5<br>16<br>2  | 4.9<br>36<br>9  | 1.71<br>0688<br>007 | 0.77<br>4576<br>667 | 1.71<br>068<br>800<br>7 | Up | 0.01<br>839<br>120<br>2 | 0.99<br>994<br>043<br>6 |
| 648<br>54  | USP4<br>6 | Ubiquitin specific<br>peptidase 46             | 5.1<br>19<br>64 | 4.9<br>44<br>48 | 5.1<br>19<br>29 | 5.9<br>93<br>84 | 5.6<br>27<br>1  | 5.4<br>94<br>59 | 1.56<br>2699<br>087 | 0.64<br>404         | 1.56<br>269<br>908<br>7 | Up | 0.00<br>958<br>619<br>6 | 0.99<br>994<br>043<br>6 |
| 644<br>99  | TPSB<br>2 | Tryptase $\beta$ 2<br>(gene/pseudogene)        | 8.3<br>86<br>41 | 8.6<br>43<br>08 | 8.3<br>07<br>74 | 9.5<br>04<br>69 | 8.6<br>09<br>74 | 9.3<br>28<br>77 | 1.62<br>6747<br>12  | 0.70<br>199         | 1.62<br>674<br>712      | Up | 0.03<br>781<br>360<br>2 | 0.99<br>994<br>043<br>6 |
| 750<br>4   | XK        | X-linked Kx blood<br>group                     | 4.3<br>18<br>87 | 5.1<br>40<br>45 | 5.3<br>62<br>58 | 5.8<br>53<br>24 | 5.8<br>69<br>94 | 5.6<br>52<br>19 | 1.80<br>3946<br>642 | 0.85<br>1156<br>667 | 1.80<br>394<br>664<br>2 | Up | 0.02<br>267<br>806<br>6 | 0.99<br>994<br>043<br>6 |
| 458<br>8   | MUC<br>6  | Mucin 6,<br>oligomeric                         | 7.3<br>48       | 9.3<br>43       | 9.7<br>79       | 11.<br>54       | 11.<br>02       | 10.<br>87       | 5.01<br>1236        | 2.32<br>5166        | 5.01<br>123             | Up | 0.00<br>901             | 0.99<br>994             |

|     |      |                    |     |     |     |     |     |     |      |      |      |    |      |      |
|-----|------|--------------------|-----|-----|-----|-----|-----|-----|------|------|------|----|------|------|
|     |      | mucus/gel-forming  | 69  | 81  | 14  | 04  | 71  | 95  | 642  | 667  | 664  |    | 707  | 043  |
|     |      |                    |     |     |     | 2   | 7   | 5   |      |      | 2    |    | 1    | 6    |
| 796 | ACS  | Acyl-coa           | 4.8 | 4.9 | 4.7 | 3.8 | 3.7 | 4.7 | -1.6 | -0.7 | 1.65 | Do | 0.03 | 0.99 |
| 11  | S3   | synthetase         | 06  | 95  | 30  | 62  | 81  | 16  | 5169 | 2394 | 169  | wn | 212  | 994  |
|     |      | short-chain family | 21  | 76  | 04  | 6   | 19  | 38  | 4269 | 6667 | 426  |    | 907  | 043  |
|     |      | member 3           |     |     |     |     |     |     |      |      | 9    |    | 6    | 6    |
| 743 | VIP  | Vasoactive         | 4.2 | 4.3 | 5.1 | 4.8 | 6.3 | 5.8 | 2.13 | 1.09 | 2.13 | Up | 0.04 | 0.99 |
| 2   |      | intestinal peptide | 64  | 82  | 70  | 47  | 56  | 96  | 5361 | 448  | 536  |    | 339  | 994  |
|     |      |                    | 71  | 15  | 01  | 47  | 34  | 5   | 015  |      | 101  |    | 989  | 043  |
|     |      |                    |     |     |     |     |     |     |      |      | 5    |    | 3    | 6    |
| 761 | CA3  | Carbonic anhydrase | 5.4 | 5.7 | 5.6 | 4.4 | 4.3 | 5.4 | -1.7 | -0.8 | 1.78 | Do | 0.03 | 0.99 |
|     |      | III                | 48  | 04  | 07  | 32  | 56  | 74  | 8027 | 3209 | 027  | wn | 625  | 994  |
|     |      |                    | 09  | 69  | 42  | 85  | 11  | 95  | 0748 | 6667 | 074  |    | 149  | 043  |
|     |      |                    |     |     |     |     |     |     |      |      | 8    |    | 8    | 6    |
| 125 | ADH  | Alcohol            | 11. | 11. | 11. | 10. | 10. | 11. | -2.2 | -1.1 | 2.26 | Do | 0.01 | 0.99 |
|     | 1B   | dehydrogenase 1B   | 91  | 63  | 58  | 13  | 12  | 33  | 6197 | 7758 | 197  | wn | 429  | 994  |
|     |      | (class I), $\beta$ | 64  | 23  | 25  | 49  | 81  | 54  | 5547 | 3333 | 554  |    | 337  | 043  |
|     |      | polypeptide        | 1   | 4   | 6   | 9   | 5   | 2   |      |      | 7    |    | 2    | 6    |
| 151 | CTS  | Cathepsin V        | 3.1 | 3.7 | 3.3 | 4.1 | 4.4 | 3.6 | 1.64 | 0.71 | 1.64 | Up | 0.02 | 0.99 |
| 5   | V    |                    | 10  | 04  | 12  | 91  | 66  | 16  | 2238 | 5663 | 223  |    | 908  | 994  |
|     |      |                    | 98  | 32  | 36  | 92  | 04  | 69  | 125  | 333  | 812  |    | 876  | 043  |
|     |      |                    |     |     |     |     |     |     |      |      | 5    |    | 6    | 6    |
| 548 | RET  | Retinol saturase   | 10. | 10. | 9.4 | 9.1 | 9.3 | 9.2 | -1.7 | -0.7 | 1.72 | Do | 0.04 | 0.99 |
| 84  | SAT  | (all-trans-retinol | 67  | 02  | 82  | 98  | 61  | 67  | 2235 | 8438 | 235  | wn | 118  | 994  |
|     |      | 13,14-reductase)   | 80  | 02  | 44  | 49  | 28  | 8   | 9936 | 6667 | 993  |    | 036  | 043  |
|     |      |                    | 5   | 4   |     |     |     |     |      |      | 6    |    | 6    | 6    |
| 286 | LUR  | Leucine rich       | 6.9 | 6.9 | 7.3 | 8.1 | 8.3 | 7.3 | 1.78 | 0.83 | 1.78 | Up | 0.02 | 0.99 |
| 343 | APIL | adaptor protein    | 61  | 64  | 55  | 10  | 42  | 32  | 4149 | 5236 | 414  |    | 878  | 994  |
|     |      | 1-like             | 13  | 15  | 34  | 51  | 88  | 94  | 695  | 667  | 969  |    | 073  | 043  |

|           |             |                                                           |                 |                 |                 |                 |                 |                 |                     |                      |                         |          |                         |                         |
|-----------|-------------|-----------------------------------------------------------|-----------------|-----------------|-----------------|-----------------|-----------------|-----------------|---------------------|----------------------|-------------------------|----------|-------------------------|-------------------------|
|           |             |                                                           |                 |                 |                 |                 |                 |                 |                     |                      | 5                       |          | 1                       | 6                       |
| 131<br>6  | KLF6<br>6   | Kruppel-like factor<br>6                                  | 6.1<br>63<br>62 | 5.1<br>11<br>91 | 5.8<br>34<br>95 | 7.0<br>37<br>6  | 7.2<br>27<br>62 | 6.2<br>05<br>38 | 2.17<br>3529<br>987 | 1.12<br>004          | 2.17<br>352<br>998<br>7 | Up       | 0.02<br>261<br>142      | 0.99<br>994<br>043<br>6 |
| 552<br>28 | PNM<br>AL1  | Paraneoplastic Ma<br>antigen family-like<br>1             | 5.4<br>51<br>39 | 5.2<br>78<br>6  | 5.0<br>27<br>16 | 6.9<br>33<br>86 | 6.4<br>73<br>88 | 5.5<br>16<br>89 | 2.07<br>8909<br>084 | 1.05<br>5826<br>667  | 2.07<br>890<br>908<br>4 | Up       | 0.02<br>660<br>648<br>1 | 0.99<br>994<br>043<br>6 |
| 241<br>47 | FJX1        | Four jointed box 1                                        | 5.3<br>38<br>15 | 4.4<br>81<br>88 | 4.6<br>09<br>5  | 6.7<br>68<br>77 | 5.7<br>93<br>37 | 5.3<br>60<br>64 | 2.24<br>1425<br>684 | 1.16<br>4416<br>667  | 2.24<br>142<br>568<br>4 | Up       | 0.02<br>778<br>751<br>7 | 0.99<br>994<br>043<br>6 |
| 549<br>79 | HRA<br>SLS2 | HRAS-like<br>suppressor 2                                 | 3.3<br>33<br>63 | 3.8<br>45<br>83 | 3.5<br>63<br>63 | 4.1<br>91<br>92 | 4.3<br>24<br>67 | 4.1<br>94<br>23 | 1.57<br>5609<br>477 | 0.65<br>591          | 1.57<br>560<br>947<br>7 | Up       | 0.00<br>407<br>706<br>9 | 0.99<br>994<br>043<br>6 |
| 536<br>6  | PMA<br>IP1  | Phorbol-12-myrista<br>te-13-acetate-induc<br>ed protein 1 | 4.3<br>85<br>84 | 3.8<br>97<br>95 | 4.8<br>46<br>65 | 4.7<br>99<br>8  | 5.3<br>62<br>92 | 5.1<br>62<br>95 | 1.66<br>0644<br>58  | 0.73<br>1743<br>333  | 1.66<br>064<br>458      | Up       | 0.03<br>546<br>543<br>5 | 0.99<br>994<br>043<br>6 |
| 510<br>02 | TPR<br>KB   | TP53RK binding<br>protein                                 | 4.4<br>02<br>68 | 4.9<br>76<br>58 | 4.6<br>04<br>12 | 3.6<br>72<br>3  | 4.0<br>07<br>87 | 4.0<br>77<br>14 | -1.6<br>7251<br>985 | -0.7<br>4202<br>3333 | 1.67<br>251<br>985      | Do<br>wn | 0.00<br>736<br>906<br>3 | 0.99<br>994<br>043<br>6 |
| 570<br>02 | YAE<br>1D1  | Yae1 domain<br>containing 1                               | 6.3<br>00<br>32 | 6.4<br>39<br>66 | 6.0<br>29<br>68 | 6.8<br>71<br>2  | 6.9<br>43<br>77 | 6.7<br>19<br>2  | 1.50<br>3338<br>614 | 0.58<br>817          | 1.50<br>333<br>861<br>4 | Up       | 0.01<br>354<br>664<br>3 | 0.99<br>994<br>043<br>6 |

|            |            |                                              |                 |                 |                 |                 |                 |                 |                      |                         |                         |          |                         |                         |
|------------|------------|----------------------------------------------|-----------------|-----------------|-----------------|-----------------|-----------------|-----------------|----------------------|-------------------------|-------------------------|----------|-------------------------|-------------------------|
| 966        | CD59       | CD59 molecule, complement regulatory protein | 5.1<br>17<br>25 | 5.7<br>88<br>48 | 5.4<br>72<br>72 | 6.4<br>45<br>95 | 6.2<br>02<br>96 | 5.8<br>78<br>83 | 1.64<br>3111<br>063  | 0.71<br>643<br>3111     | 1.64<br>063             | Up       | 0.02<br>248<br>407<br>4 | 0.99<br>994<br>043<br>6 |
| 556<br>12  | FER<br>MT1 | Fermitin family member 1                     | 6.1<br>73<br>67 | 7.6<br>95<br>13 | 6.5<br>40<br>56 | 8.6<br>12<br>33 | 7.8<br>20<br>68 | 7.5<br>21<br>56 | 2.26<br>8496<br>866  | 1.18<br>1736<br>667     | 2.26<br>849<br>686<br>6 | Up       | 0.04<br>211<br>516<br>7 | 0.99<br>994<br>043<br>6 |
| 127<br>700 | OSC<br>P1  | Organic solute carrier partner 1             | 4.8<br>46<br>06 | 4.8<br>64<br>43 | 4.6<br>56<br>28 | 4.0<br>55<br>57 | 4.0<br>78<br>75 | 4.4<br>31<br>45 | -1.5<br>1606<br>6812 | -0.6<br>0033<br>3333    | 1.51<br>606<br>681<br>2 | Do<br>wn | 0.00<br>615<br>407<br>2 | 0.99<br>994<br>043<br>6 |
| 229<br>43  | DKK<br>1   | Dickkopf WNT signaling pathway inhibitor 1   | 5.3<br>76<br>92 | 5.7<br>79<br>27 | 4.8<br>99<br>29 | 8.9<br>94<br>87 | 7.1<br>05<br>49 | 5.9<br>37<br>6  | 3.98<br>3840<br>81   | 1.99<br>416<br>081      | 3.98<br>384<br>081      | Up       | 0.03<br>478<br>911<br>4 | 0.99<br>994<br>043<br>6 |
| 190<br>8   | EDN<br>3   | Endothelin 3                                 | 3.2<br>45<br>29 | 3.8<br>05<br>74 | 3.3<br>83<br>56 | 4.9<br>26<br>11 | 5.1<br>82<br>37 | 3.6<br>88<br>71 | 2.17<br>4775<br>78   | 1.12<br>0866<br>667     | 2.17<br>477<br>578      | Up       | 0.02<br>892<br>000<br>8 | 0.99<br>994<br>043<br>6 |
| 871<br>78  | PNP<br>T1  | Polyribonucleotide nucleotidyltransferase 1  | 4.2<br>37<br>82 | 4.4<br>30<br>35 | 4.9<br>59<br>75 | 5.2<br>69<br>4  | 5.0<br>50<br>09 | 5.1<br>26<br>31 | 1.52<br>1991<br>182  | 0.60<br>596<br>118<br>2 | 1.52<br>199<br>118<br>2 | Up       | 0.02<br>588<br>592<br>5 | 0.99<br>994<br>043<br>6 |
| 602        | BCL<br>3   | B-cell CLL/lymphoma 3                        | 8.4<br>22<br>12 | 8.2<br>22<br>06 | 8.5<br>43<br>43 | 7.7<br>69<br>93 | 7.5<br>27<br>59 | 7.5<br>04<br>96 | -1.7<br>3512<br>9491 | -0.7<br>9504<br>3333    | 1.73<br>512<br>949<br>1 | Do<br>wn | 0.00<br>293<br>777      | 0.99<br>994<br>043<br>6 |
| 147        | PRO        | Protein interacting                          | 5.3             | 5.5             | 5.1             | 5.0             | 4.5             | 4.4             | -1.6                 | -0.6                    | 1.60                    | Do       | 0.01                    | 0.99                    |

|     |      |                                                                             |          |          |          |          |          |          |              |              |                 |    |                 |                 |
|-----|------|-----------------------------------------------------------------------------|----------|----------|----------|----------|----------|----------|--------------|--------------|-----------------|----|-----------------|-----------------|
| 011 | CA1  | with cyclin A1                                                              | 90<br>67 | 22<br>37 | 73<br>66 | 09<br>98 | 59<br>42 | 73<br>39 | 0358<br>7785 | 8130<br>3333 | 358<br>778<br>5 | wn | 099<br>789<br>3 | 994<br>043<br>6 |
| 510 | ST8S | ST8                                                                         | 3.1      | 3.4      | 3.8      | 4.0      | 4.8      | 4.2      | 1.82         | 0.87         | 1.82            | Up | 0.01            | 0.99            |
| 46  | IA3  | $\alpha$ -N-acetyl-neurami<br>nide<br>$\alpha$ -2,8-sialyltransfer<br>ase 3 | 69<br>3  | 87<br>19 | 00<br>32 | 52<br>47 | 11<br>98 | 03<br>21 | 8021<br>874  | 0283<br>333  | 802<br>187<br>4 |    | 178<br>697<br>6 | 994<br>043<br>6 |
| 758 | ZKS  | Zinc finger with                                                            | 3.9      | 5.1      | 4.5      | 5.5      | 5.4      | 5.5      | 1.92         | 0.94         | 1.92            | Up | 0.01            | 0.99            |
| 6   | CAN  | KRAB and SCAN                                                               | 52       | 31       | 50       | 41       | 27       | 04       | 7245         | 654          | 724             |    | 669             | 994             |
|     | 1    | domains 1                                                                   | 43       | 48       | 17       | 56       | 99       | 15       | 02           |              | 502             |    | 856<br>6        | 043<br>6        |
| 845 | PLPP | Phospholipid                                                                | 4.2      | 4.9      | 4.9      | 5.6      | 5.4      | 5.1      | 1.65         | 0.72         | 1.65            | Up | 0.02            | 0.99            |
| 13  | 5    | phosphatase 5                                                               | 31       | 19       | 01       | 87       | 00       | 45       | 5205         | 701          | 520             |    | 392             | 994             |
|     |      |                                                                             | 19       | 52       | 7        | 66       | 26       | 52       | 105          |              | 510<br>5        |    | 779<br>9        | 043<br>6        |
| 555 | HES6 | Hes family bhlh                                                             | 5.6      | 6.5      | 6.5      | 7.1      | 6.9      | 6.9      | 1.73         | 0.79         | 1.73            | Up | 0.02            | 0.99            |
| 02  |      | transcription factor                                                        | 68       | 12       | 45       | 58       | 82       | 70       | 5498         | 535          | 549             |    | 375             | 994             |
|     |      | 6                                                                           | 41       | 21       | 08       | 89       | 11       | 75       | 358          |              | 835<br>8        |    | 047<br>2        | 043<br>6        |
| 531 | PKP2 | Plakophilin 2                                                               | 3.6      | 4.6      | 4.3      | 6.1      | 4.7      | 5.0      | 2.13         | 1.09         | 2.13            | Up | 0.04            | 0.99            |
| 8   |      |                                                                             | 06       | 74       | 87       | 58       | 59       | 33       | 4773         | 4083         | 477             |    | 385             | 994             |
|     |      |                                                                             | 99       | 22       | 4        | 48       | 11       | 27       | 982          | 333          | 398<br>2        |    | 326<br>7        | 043<br>6        |
| 108 | HSP  | Heat shock protein                                                          | 8.5      | 8.9      | 9.0      | 9.2      | 9.6      | 9.7      | 1.60         | 0.68         | 1.60            | Up | 0.01            | 0.99            |
| 08  | H1   | family H (Hsp110)                                                           | 38       | 45       | 87       | 86       | 06       | 31       | 6818         | 4206         | 681             |    | 774             | 994             |
|     |      | member 1                                                                    | 57       | 38       | 76       | 21       | 64       | 48       | 154          | 667          | 815<br>4        |    | 150<br>2        | 043<br>6        |
| 379 | KCN  | Potassium                                                                   | 4.5      | 4.0      | 4.3      | 7.0      | 6.2      | 4.7      | 3.19         | 1.67         | 3.19            | Up | 0.02            | 0.99            |

|            |                 |                                                       |                 |                 |                      |                      |                      |                      |                      |                         |                         |      |                         |                         |
|------------|-----------------|-------------------------------------------------------|-----------------|-----------------|----------------------|----------------------|----------------------|----------------------|----------------------|-------------------------|-------------------------|------|-------------------------|-------------------------|
| 0          | S3              | voltage-gated channel, modifier subfamily S, member 3 | 65<br>12        | 86<br>11        | 13<br>95             | 11<br>25             | 55<br>64             | 23<br>36             | 3245<br>191          | 5023<br>333             | 324<br>519<br>1         |      | 206<br>362<br>9         | 994<br>043<br>6         |
| 112<br>4   | CHN<br>2        | Chimerin 2                                            | 3.5<br>52<br>12 | 3.8<br>90<br>41 | 3.7<br>80<br>03      | 4.2<br>32<br>62      | 4.2<br>36<br>85      | 4.5<br>65<br>55      | 1.52<br>0086<br>407  | 0.60<br>4153<br>333     | 1.52<br>008<br>640<br>7 | Up   | 0.00<br>574<br>270<br>9 | 0.99<br>994<br>043<br>6 |
| 191        | AHC<br>Y        | Adenosylhomocysteinase                                | 6.1<br>91<br>8  | 6.7<br>31<br>75 | 6.8<br>59<br>43      | 7.6<br>90<br>84      | 7.2<br>09<br>82      | 7.5<br>31<br>37      | 1.84<br>4227<br>541  | 0.88<br>3016<br>667     | 1.84<br>422<br>754<br>1 | Up   | 0.00<br>931<br>756<br>6 | 0.99<br>994<br>043<br>6 |
| 259<br>87  | TSK<br>U        | Tsukushi, small leucine rich proteoglycan             | 8.5<br>83<br>19 | 8.2<br>16<br>82 | 8.8<br>52<br>66      | 7.7<br>08<br>54      | 7.5<br>77<br>69      | 7.5<br>50<br>91      | -1.9<br>1654<br>7826 | -0.9<br>3851<br>782     | 1.91<br>654<br>782<br>6 | Down | 0.00<br>319<br>146<br>6 | 0.99<br>994<br>043<br>6 |
| 988<br>6   | RHO<br>BTB<br>1 | Rho-related BTB domain containing 1                   | 6.0<br>10<br>95 | 5.8<br>84<br>69 | 5.9<br>00<br>16      | 7.0<br>76<br>52      | 6.3<br>19<br>56      | 6.3<br>08<br>22      | 1.55<br>4194<br>075  | 0.63<br>6166<br>667     | 1.55<br>419<br>407<br>5 | Up   | 0.03<br>803<br>878<br>6 | 0.99<br>994<br>043<br>6 |
| 112<br>21  | DUS<br>P10      | Dual specificity phosphatase 10                       | 4.4<br>21<br>26 | 4.5<br>35<br>93 | 4.4<br>67<br>13      | 4.9<br>50<br>95      | 4.9<br>90<br>52      | 5.3<br>22<br>42      | 1.52<br>9637<br>715  | 0.61<br>319<br>771      | 1.52<br>963<br>771<br>5 | Up   | 0.00<br>491<br>328<br>7 | 0.99<br>994<br>043<br>6 |
| 406<br>991 | MIR2<br>1       | Microrna 21                                           | 8.7<br>99<br>5  | 8.8<br>76<br>39 | 10.<br>00<br>35<br>5 | 10.<br>38<br>81<br>2 | 10.<br>91<br>15<br>6 | 10.<br>08<br>67<br>4 | 2.35<br>4890<br>537  | 1.23<br>566<br>053<br>7 | 2.35<br>489<br>053<br>7 | Up   | 0.01<br>719<br>173<br>6 | 0.99<br>994<br>043<br>6 |
| 556        | TRM             | Trna                                                  | 4.8             | 5.0             | 5.3                  | 4.3                  | 4.5                  | 4.1                  | -1.6                 | -0.7                    | 1.62                    | Do   | 0.00                    | 0.99                    |

|                   |                          |                                                                      |                      |                      |                      |                 |                 |                      |                     |                      |                         |          |                         |                         |
|-------------------|--------------------------|----------------------------------------------------------------------|----------------------|----------------------|----------------------|-----------------|-----------------|----------------------|---------------------|----------------------|-------------------------|----------|-------------------------|-------------------------|
| 87                | U                        | 5-methylaminomethyl-2-thiouridylate methyltransferase                | 68<br>7              | 16<br>64             | 44<br>91             | 95<br>93        | 25<br>82        | 95<br>05             | 2956<br>0972        | 0448<br>3333         | 956<br>097<br>2         | wn       | 568<br>582<br>6         | 994<br>043<br>6         |
| 717<br>7          | TPS<br>AB1               | Tryptase $\alpha/\beta$ 1                                            | 8.3<br>86<br>41      | 8.6<br>43<br>08      | 8.3<br>07<br>74      | 9.5<br>04<br>69 | 8.6<br>09<br>74 | 9.3<br>28<br>77      | 1.62<br>6747<br>12  | 0.70<br>199<br>712   | 1.62<br>674<br>712      | Up       | 0.03<br>781<br>360<br>2 | 0.99<br>994<br>043<br>6 |
| 258<br>30         | SULT<br>4A1              | Sulfotransferase family 4A member 1                                  | 4.1<br>80<br>49      | 4.3<br>95<br>74      | 3.9<br>57<br>1       | 5.3<br>49<br>43 | 4.8<br>80<br>41 | 4.5<br>79<br>91      | 1.69<br>2090<br>424 | 0.75<br>8806<br>667  | 1.69<br>209<br>042<br>4 | Up       | 0.01<br>457<br>793<br>4 | 0.99<br>994<br>043<br>6 |
| 105<br>376<br>948 | LOC<br>1053<br>7694<br>8 | Uncharacterized LOC105376948                                         | 4.7<br>12<br>15      | 5.1<br>63<br>49      | 4.8<br>98<br>04      | 5.0<br>63<br>83 | 5.8<br>25<br>74 | 6.0<br>46<br>59      | 1.64<br>8126<br>143 | 0.72<br>0826<br>667  | 1.64<br>812<br>614<br>3 | Up       | 0.04<br>211<br>211      | 0.99<br>994<br>043<br>6 |
| 657<br>1          | SLC1<br>8A2              | Solute carrier family 18 (vesicular monoamine transporter), member 2 | 4.4<br>94<br>33      | 4.7<br>13<br>54      | 4.1<br>32<br>41      | 5.7<br>21<br>21 | 4.8<br>29<br>26 | 5.3<br>55<br>3       | 1.80<br>8963<br>544 | 0.85<br>5163<br>333  | 1.80<br>896<br>354<br>4 | Up       | 0.01<br>759<br>625<br>6 | 0.99<br>994<br>043<br>6 |
| 126               | ADH<br>1C                | Alcohol dehydrogenase 1C (class I), gamma polypeptide                | 10.<br>18<br>18<br>3 | 11.<br>14<br>67<br>4 | 10.<br>92<br>37<br>2 | 9.0<br>93<br>93 | 9.2<br>14<br>67 | 10.<br>39<br>43<br>7 | -2.2<br>7065<br>208 | -1.1<br>8310<br>6667 | 2.27<br>065<br>208      | Do<br>wn | 0.02<br>938<br>095<br>2 | 0.99<br>994<br>043<br>6 |
| 213               | ALB                      | Albumin                                                              | 3.5<br>96<br>21      | 4.8<br>90<br>43      | 4.9<br>47<br>8       | 7.7<br>64<br>61 | 5.4<br>09<br>09 | 7.5<br>13<br>49      | 5.34<br>2753<br>043 | 2.41<br>7583<br>333  | 5.34<br>275<br>304<br>3 | Up       | 0.01<br>224<br>227<br>3 | 0.99<br>994<br>043<br>6 |

|           |                 |                                                                          |                 |                 |                 |                 |                 |                 |                      |                          |                         |          |                         |                         |
|-----------|-----------------|--------------------------------------------------------------------------|-----------------|-----------------|-----------------|-----------------|-----------------|-----------------|----------------------|--------------------------|-------------------------|----------|-------------------------|-------------------------|
| 595       | CCN<br>D1       | Cyclin D1                                                                | 5.1<br>98<br>32 | 5.7<br>00<br>83 | 6.0<br>17<br>48 | 6.4<br>61<br>38 | 6.1<br>22<br>22 | 6.4<br>39<br>57 | 1.62<br>6961<br>374  | 0.70<br>218              | 1.62<br>696<br>137<br>4 | Up       | 0.02<br>713<br>905<br>1 | 0.99<br>994<br>043<br>6 |
| 204<br>3  | EPH<br>A4       | EPH receptor A4                                                          | 5.3<br>07       | 4.8<br>11<br>22 | 4.1<br>55<br>31 | 5.2<br>88<br>73 | 6.6<br>34<br>93 | 5.7<br>25<br>94 | 2.18<br>1554<br>728  | 1.12<br>5356<br>667      | 2.18<br>155<br>472<br>8 | Up       | 0.03<br>692<br>242<br>2 | 0.99<br>994<br>043<br>6 |
| 231<br>42 | DCU<br>N1D<br>4 | DCN1, defective in<br>cullin neddylation<br>1,<br>domain<br>containing 4 | 7.3<br>48<br>96 | 7.0<br>57<br>19 | 6.8<br>45<br>67 | 6.6<br>63<br>78 | 6.1<br>81<br>85 | 6.4<br>95<br>43 | -1.5<br>5500<br>5842 | -0.6<br>3692<br>584<br>2 | 1.55<br>500<br>584<br>2 | Do<br>wn | 0.02<br>178<br>663<br>9 | 0.99<br>994<br>043<br>6 |
| 101<br>02 | TSF<br>M        | Ts translation<br>elongation factor,<br>mitochondrial                    | 4.2<br>40<br>12 | 4.3<br>40<br>01 | 4.4<br>30<br>2  | 5.7<br>86<br>6  | 4.6<br>20<br>49 | 4.9<br>36<br>5  | 1.71<br>4458<br>916  | 0.77<br>7753<br>333      | 1.71<br>445<br>891<br>6 | Up       | 0.03<br>848<br>719<br>4 | 0.99<br>994<br>043<br>6 |
| 31        | ACA<br>CA       | Acetyl-coa<br>carboxylase $\alpha$                                       | 8.2<br>69<br>7  | 8.0<br>21<br>24 | 8.7<br>16<br>3  | 7.9<br>61<br>06 | 7.4<br>11<br>4  | 7.5<br>68<br>7  | -1.61<br>1823<br>009 | -0.6<br>8869<br>3333     | 1.61<br>182<br>300<br>9 | Do<br>wn | 0.03<br>035<br>100<br>1 | 0.99<br>994<br>043<br>6 |
| 234<br>23 | TME<br>D3       | Transmembrane<br>p24 trafficking<br>protein 3                            | 6.8<br>77<br>01 | 7.4<br>99<br>08 | 7.5<br>45<br>64 | 8.2<br>80<br>82 | 7.9<br>81<br>9  | 7.9<br>59<br>2  | 1.70<br>1409<br>011  | 0.76<br>673              | 1.70<br>140<br>901<br>1 | Up       | 0.01<br>557<br>076<br>3 | 0.99<br>994<br>043<br>6 |
| 633<br>8  | SCN<br>N1B      | Sodium channel,<br>non-voltage gated 1<br>$\beta$ subunit                | 6.5<br>19<br>74 | 5.1<br>19<br>75 | 5.0<br>87<br>81 | 4.5<br>07<br>53 | 4.3<br>76<br>24 | 4.6<br>32<br>8  | -2.0<br>9978<br>75   | -1.0<br>7024<br>3333     | 2.09<br>978<br>75       | Do<br>wn | 0.03<br>327<br>064<br>2 | 0.99<br>994<br>043<br>6 |
| 544       | KRT             | Keratin 20, type I                                                       | 4.3             | 4.7             | 4.1             | 7.5             | 8.2             | 5.1             | 6.02                 | 2.59                     | 6.02                    | Up       | 0.01                    | 0.99                    |



|                   |                          |                                                                       |                 |                 |                 |                 |                 |                 |                     |                         |                         |    |                         |                         |
|-------------------|--------------------------|-----------------------------------------------------------------------|-----------------|-----------------|-----------------|-----------------|-----------------|-----------------|---------------------|-------------------------|-------------------------|----|-------------------------|-------------------------|
| 74                | 20                       |                                                                       | 54<br>85        | 01<br>41        | 40<br>48        | 79<br>98        | 64<br>09        | 27<br>37        | 7528<br>915         | 1566<br>667             | 752<br>891<br>5         |    | 426<br>279<br>7         | 994<br>043<br>6         |
| 517<br>51         | HIG<br>D1B               | HIG1 hypoxia<br>inducible domain<br>family member 1B                  | 6.1<br>37<br>9  | 6.2<br>44<br>73 | 6.2<br>91<br>82 | 7.2<br>94<br>17 | 7.7<br>38<br>63 | 6.4<br>77<br>8  | 1.92<br>5700<br>489 | 0.94<br>5383<br>333     | 1.92<br>570<br>048<br>9 | Up | 0.02<br>513<br>291<br>3 | 0.99<br>994<br>043<br>6 |
| 678               | ZFP3<br>6L2              | ZFP36 ring finger<br>protein-like 2                                   | 6.8<br>99<br>48 | 8.1<br>21<br>74 | 7.8<br>49<br>35 | 8.7<br>08<br>85 | 8.8<br>22<br>65 | 8.0<br>76<br>8  | 1.88<br>2404<br>49  | 0.91<br>2576<br>667     | 1.88<br>240<br>449      | Up | 0.04<br>751<br>536<br>3 | 0.99<br>994<br>043<br>6 |
| 100<br>131<br>541 | LOC<br>1001<br>3154<br>1 | Uncharacterized<br>LOC100131541                                       | 5.4<br>13<br>89 | 5.5<br>72<br>68 | 5.5<br>18<br>27 | 7.4<br>19<br>43 | 6.1<br>97<br>09 | 5.9<br>58<br>73 | 2.03<br>2802<br>423 | 1.02<br>347<br>242<br>3 | 2.03<br>280<br>242<br>3 | Up | 0.03<br>503<br>358<br>6 | 0.99<br>994<br>043<br>6 |
| 585<br>13         | EPS1<br>5L1              | Epidermal growth<br>factor receptor<br>pathway substrate<br>15-like 1 | 4.5<br>09<br>93 | 4.4<br>69<br>33 | 4.3<br>83<br>5  | 5.4<br>01<br>69 | 5.0<br>99<br>18 | 4.7<br>50<br>15 | 1.54<br>6942<br>958 | 0.62<br>942<br>295<br>8 | 1.54<br>694<br>295<br>8 | Up | 0.01<br>369<br>506<br>9 | 0.99<br>994<br>043<br>6 |
| 558<br>59         | BEX<br>1                 | Brain expressed<br>X-linked 1                                         | 6.2<br>44<br>9  | 6.2<br>87<br>35 | 6.5<br>10<br>06 | 6.8<br>20<br>24 | 7.9<br>40<br>3  | 7.7<br>11<br>26 | 2.20<br>8647<br>73  | 1.14<br>3163<br>333     | 2.20<br>864<br>773      | Up | 0.00<br>922<br>806<br>6 | 0.99<br>994<br>043<br>6 |
| 916<br>12         | CHU<br>RC1               | Churchill domain<br>containing 1                                      | 4.5<br>38<br>96 | 4.7<br>64<br>17 | 4.8<br>90<br>75 | 5.8<br>24<br>8  | 4.9<br>88<br>68 | 5.5<br>33<br>28 | 1.64<br>4474<br>534 | 0.71<br>7626<br>667     | 1.64<br>447<br>453<br>4 | Up | 0.02<br>274<br>448<br>5 | 0.99<br>994<br>043<br>6 |

Table SIV. DEGs in comparison IV.

| En try | Gene symb ol | Gene name                       | A 10 | A 10 | A 10 | A 10 | A 10 | A 10 | Fol d-c han ge | log FC | abs olu teFC | Re gu lat ion | P-v alu e | FD R |
|--------|--------------|---------------------------------|------|------|------|------|------|------|----------------|--------|--------------|---------------|-----------|------|
| 87     | TNF          | Tumor necrosis                  | 4.   | 3.   | 5.   | 5.   | 6.   | 5.   | 2.2            | 1.1    | 2.2          | U             | 0.0       | 0.9  |
| 94     | RSF1         | factor receptor                 | 97   | 82   | 28   | 68   | 56   | 33   | 472            | 681    | 47           | p             | 28        | 30   |
|        | OC           | superfamily                     | 00   | 37   | 72   | 33   | 35   | 86   | 594            | 666    | 25           |               | 85        | 85   |
|        |              | member 10c, decoy               | 8    | 6    | 1    | 4    | 9    | 2    | 05             | 67     | 94           |               | 02        | 92   |
|        |              | without an intracellular domain |      |      |      |      |      |      |                |        | 05           |               | 44        | 11   |
| 74     | WNT          | Wingless-type                   | 5.   | 5.   | 5.   | 4.   | 5.   | 4.   | -1.            | -0.    | 1.5          | D             | 0.0       | 0.9  |
| 74     | 5A           | MMTV integration                | 78   | 31   | 49   | 79   | 02   | 79   | 579            | 659    | 79           | o             | 04        | 30   |
|        |              | site family member              | 53   | 26   | 28   | 51   | 47   | 36   | 119            | 12     | 11           | w             | 75        | 85   |
|        |              | 5A                              | 5    | 7    | 7    | 7    | 6    |      | 115            |        | 91           | n             | 38        | 92   |
|        |              |                                 |      |      |      |      |      |      |                |        | 15           |               | 32        | 11   |
| 17     | DM           | Dystrophin                      | 7.   | 9.   | 9.   | 6.   | 8.   | 7.   | -2.            | -1.    | 2.6          | D             | 0.0       | 0.9  |
| 56     | D            |                                 | 95   | 00   | 69   | 79   | 40   | 20   | 673            | 418    | 73           | o             | 27        | 30   |
|        |              |                                 | 20   | 84   | 69   | 39   | 62   | 02   | 976            | 986    | 97           | w             | 79        | 85   |
|        |              |                                 | 2    | 7    | 1    |      | 9    | 5    | 278            | 667    | 62           | n             | 09        | 92   |
|        |              |                                 |      |      |      |      |      |      |                |        | 78           |               | 66        | 11   |
| 10     | SUB          | SUB1 homolog,                   | 4.   | 5.   | 5.   | 4.   | 4.   | 4.   | -1.            | -0.    | 1.6          | D             | 0.0       | 0.9  |
| 92     | 1            | transcriptional                 | 88   | 27   | 89   | 68   | 44   | 73   | 657            | 729    | 57           | o             | 21        | 30   |
| 3      |              | regulator                       | 14   | 38   | 22   | 42   | 24   | 25   | 945            | 396    | 94           | w             | 41        | 85   |
|        |              |                                 |      | 8    | 5    | 9    | 7    | 8    | 596            | 667    | 55           | n             | 54        | 92   |
|        |              |                                 |      |      |      |      |      |      |                |        | 96           |               | 8         | 11   |
| 34     | APO          | Apolipoprotein C-I              | 10   | 9.   | 9.   | 7.   | 8.   | 9.   | -2.            | -1.1   | 2.1          | D             | 0.0       | 0.9  |

|    |      |                    |    |    |    |    |    |    |     |     |     |   |     |     |
|----|------|--------------------|----|----|----|----|----|----|-----|-----|-----|---|-----|-----|
| 1  | C1   |                    | .1 | 44 | 37 | 87 | 67 | 12 | 162 | 125 | 62  | o | 13  | 30  |
|    |      |                    | 83 | 24 | 33 | 09 | 03 | 00 | 329 | 866 | 32  | w | 01  | 85  |
|    |      |                    | 32 | 6  | 4  | 7  | 3  | 6  | 929 | 67  | 99  | n | 94  | 92  |
|    |      |                    |    |    |    |    |    |    |     |     | 29  |   | 39  | 11  |
| 62 | CFB  | Complement factor  | 7. | 8. | 8. | 6. | 6. | 7. | -2. | -1. | 2.1 | D | 0.0 | 0.9 |
| 9  |      | B                  | 82 | 19 | 20 | 78 | 70 | 48 | 120 | 084 | 20  | o | 02  | 30  |
|    |      |                    | 76 | 56 | 57 | 03 | 83 | 64 | 821 | 623 | 82  | w | 10  | 85  |
|    |      |                    | 6  | 6  | 5  | 9  | 9  | 2  | 695 | 333 | 16  | n | 07  | 92  |
|    |      |                    |    |    |    |    |    |    |     |     | 95  |   | 91  | 11  |
| 31 | HLA  | Major              | 8. | 8. | 8. | 7. | 8. | 8. | -1. | -0. | 1.6 | D | 0.0 | 0.9 |
| 22 | -DR  | histocompatibility | 33 | 36 | 95 | 22 | 02 | 17 | 669 | 739 | 69  | o | 34  | 30  |
|    | A    | complex, class II, | 24 | 48 | 06 | 60 | 51 | 97 | 022 | 003 | 02  | w | 17  | 85  |
|    |      | DR $\alpha$        | 2  | 8  | 9  | 8  | 3  | 7  | 419 | 333 | 24  | n | 87  | 92  |
|    |      |                    |    |    |    |    |    |    |     |     | 19  |   | 05  | 11  |
| 23 | TBC  | TBC1 domain        | 4. | 4. | 4. | 3. | 3. | 3. | -1. | -0. | 1.5 | D | 0.0 | 0.9 |
| 21 | 1D1  | family member 1    | 30 | 30 | 57 | 92 | 63 | 85 | 504 | 589 | 04  | o | 02  | 30  |
| 6  |      |                    | 82 | 62 | 10 | 86 | 02 | 75 | 937 | 703 | 93  | w | 94  | 85  |
|    |      |                    | 4  | 9  | 5  | 8  | 8  | 1  | 25  | 333 | 72  | n | 35  | 92  |
|    |      |                    |    |    |    |    |    |    |     |     | 5   |   | 22  | 11  |
| 10 | UBE  | Ubiquitin          | 7. | 6. | 7. | 8. | 7. | 7. | 1.6 | 0.7 | 1.6 | U | 0.0 | 0.9 |
| 08 | 2CP5 | conjugating        | 31 | 82 | 15 | 23 | 69 | 64 | 979 | 637 | 97  | p | 07  | 30  |
| 74 |      | enzyme E2C         | 08 | 56 | 15 | 83 | 52 | 57 | 178 | 666 | 91  |   | 92  | 85  |
| 26 |      | pseudogene 5       | 4  | 3  | 9  | 5  | 5  | 6  | 59  | 67  | 78  |   | 17  | 92  |
| 0  |      |                    |    |    |    |    |    |    |     |     | 59  |   | 61  | 11  |
| 23 | CEL  | Chymotrypsin like  | 4. | 3. | 3. | 4. | 4. | 4. | 1.8 | 0.8 | 1.8 | U | 0.0 | 0.9 |
| 43 | A3B  | elastase family    | 04 | 43 | 87 | 69 | 41 | 94 | 657 | 997 | 65  | p | 02  | 30  |
| 6  |      | member 3B          | 43 | 44 | 75 | 02 | 69 | 85 | 857 | 833 | 78  |   | 40  | 85  |
|    |      |                    | 5  | 5  | 3  |    | 3  | 5  | 55  | 33  | 57  |   | 97  | 92  |
|    |      |                    |    |    |    |    |    |    |     |     | 55  |   | 76  | 11  |

|    |     |                     |    |    |    |    |    |    |     |     |     |   |     |     |
|----|-----|---------------------|----|----|----|----|----|----|-----|-----|-----|---|-----|-----|
| 13 | CRE | Camp responsive     | 4. | 4. | 4. | 3. | 3. | 3. | -1. | -0. | 1.5 | D | 0.0 | 0.9 |
| 85 | B1  | element binding     | 05 | 60 | 32 | 64 | 95 | 59 | 510 | 595 | 10  | o | 09  | 30  |
|    |     | protein 1           | 52 | 43 | 15 | 63 | 26 | 60 | 894 | 403 | 89  | w | 51  | 85  |
|    |     |                     | 9  | 9  | 9  | 5  | 5  | 6  | 926 | 333 | 49  | n | 43  | 92  |
|    |     |                     |    |    |    |    |    |    |     |     | 26  |   | 56  | 11  |
| 28 | LGA | Lectin,             | 6. | 6. | 7. | 5. | 6. | 6. | -1. | -0. | 1.5 | D | 0.0 | 0.9 |
| 41 | LS9 | galactoside-binding | 98 | 93 | 16 | 90 | 66 | 73 | 507 | 592 | 07  | o | 38  | 30  |
| 94 | B   | , soluble, 9B       | 30 | 51 | 41 | 81 | 25 | 45 | 700 | 35  | 70  | w | 33  | 85  |
|    |     |                     | 7  | 9  | 1  | 9  | 8  | 5  | 636 |     | 06  | n | 51  | 92  |
|    |     |                     |    |    |    |    |    |    |     |     | 36  |   | 89  | 11  |
| 55 | UTP | UTP6 small          | 5. | 5. | 5. | 5. | 4. | 5. | -1. | -0. | 1.5 | D | 0.0 | 0.9 |
| 81 | 6   | subunit processome  | 24 | 79 | 80 | 20 | 64 | 21 | 506 | 591 | 06  | o | 32  | 30  |
| 3  |     | component           | 24 | 46 | 00 | 08 | 62 | 58 | 704 | 396 | 70  | w | 99  | 85  |
|    |     |                     | 3  |    | 6  | 1  | 2  | 7  | 676 | 667 | 46  | n | 03  | 92  |
|    |     |                     |    |    |    |    |    |    |     |     | 76  |   | 6   | 11  |
| 34 | IGH | Immunoglobulin      | 8. | 9. | 8. | 7. | 8. | 7. | -1. | -0. | 1.9 | D | 0.0 | 0.9 |
| 92 |     | heavy locus         | 29 | 48 | 88 | 93 | 11 | 70 | 958 | 969 | 58  | o | 111 | 30  |
|    |     |                     | 12 | 48 | 50 | 20 | 57 | 46 | 265 | 576 | 26  | w | 20  | 85  |
|    |     |                     | 4  | 6  | 7  | 4  | 9  | 1  | 892 | 667 | 58  | n | 09  | 92  |
|    |     |                     |    |    |    |    |    |    |     |     | 92  |   | 9   | 11  |
| 11 | FZD | Frizzled class      | 4. | 3. | 4. | 3. | 4. | 3. | -1. | -0. | 1.6 | D | 0.0 | 0.9 |
| 21 | 10  | receptor 10         | 17 | 93 | 37 | 11 | 01 | 21 | 635 | 709 | 35  | o | 21  | 30  |
| 1  |     |                     | 57 | 32 | 23 | 93 | 62 | 78 | 029 | 316 | 02  | w | 24  | 85  |
|    |     |                     | 6  | 8  | 3  | 3  | 1  | 8  | 501 | 667 | 95  | n | 82  | 92  |
|    |     |                     |    |    |    |    |    |    |     |     | 01  |   | 81  | 11  |
| 17 | SYN | Synaptopodin 2      | 6. | 8. | 7. | 4. | 7. | 5. | -3. | -1. | 3.6 | D | 0.0 | 0.9 |
| 10 | PO2 |                     | 72 | 00 | 79 | 52 | 15 | 22 | 656 | 870 | 56  | o | 22  | 30  |
| 24 |     |                     | 31 | 14 | 08 | 10 | 97 | 34 | 263 | 37  | 26  | w | 10  | 85  |
|    |     |                     |    | 4  |    | 2  | 9  | 2  | 382 |     | 33  | n | 78  | 92  |

|                |             |                                                                |                     |                     |                     |                     |                     |                     |                          |                          |                             |                  |                             |                             |    |
|----------------|-------------|----------------------------------------------------------------|---------------------|---------------------|---------------------|---------------------|---------------------|---------------------|--------------------------|--------------------------|-----------------------------|------------------|-----------------------------|-----------------------------|----|
|                |             |                                                                |                     |                     |                     |                     |                     |                     |                          |                          |                             | 82               |                             | 47                          | 11 |
| 25<br>80<br>0  | SLC<br>39A6 | Solute carrier<br>family 39 (zinc<br>transporter),<br>member 6 | 5.<br>10<br>2<br>6  | 5.<br>66<br>12<br>8 | 6.<br>05<br>53<br>8 | 4.<br>83<br>78<br>6 | 4.<br>72<br>71<br>8 | 5.<br>27<br>51<br>8 | -1.<br>579<br>505<br>908 | -0.<br>659<br>473<br>333 | 1.5<br>79<br>50<br>59       | D<br>o<br>w<br>n | 0.0<br>38<br>91<br>31       | 0.9<br>30<br>85<br>92       |    |
| 12<br>64<br>32 | RIN<br>L    | Ras and Rab<br>interactor like                                 | 5.<br>29<br>09<br>1 | 5.<br>02<br>80<br>1 | 4.<br>64<br>24<br>9 | 5.<br>87<br>28<br>9 | 5.<br>33<br>31<br>2 | 5.<br>51<br>24<br>2 | 1.5<br>007<br>392<br>5   | 0.5<br>856<br>733<br>33  | 1.5<br>00<br>73<br>92<br>5  | U<br>p           | 0.0<br>28<br>35<br>79<br>09 | 0.9<br>30<br>85<br>92<br>11 |    |
| 65<br>36<br>35 | WAS<br>H7P  | WAS protein<br>family homolog 7<br>pseudogene                  | 7.<br>80<br>77<br>1 | 7.<br>50<br>08<br>5 | 7.<br>00<br>97<br>2 | 8.<br>94<br>64<br>6 | 8.<br>50<br>34<br>6 | 8.<br>07<br>44<br>4 | 2.0<br>975<br>327<br>45  | 1.0<br>686<br>933<br>33  | 2.0<br>97<br>53<br>27<br>45 | U<br>p           | 0.0<br>05<br>38<br>14<br>06 | 0.9<br>30<br>85<br>92<br>11 |    |
| 68<br>40       | SVIL        | Supervillin                                                    | 6.<br>57<br>89<br>6 | 7.<br>38<br>74<br>5 | 8.<br>13<br>84<br>3 | 5.<br>89<br>43<br>8 | 6.<br>81<br>28<br>8 | 6.<br>51<br>40<br>8 | -1.<br>946<br>919<br>635 | -0.<br>961<br>193<br>333 | 1.9<br>46<br>91<br>96<br>35 | D<br>o<br>w<br>n | 0.0<br>45<br>36<br>91<br>39 | 0.9<br>30<br>85<br>92<br>11 |    |
| 11<br>61<br>59 | CYY<br>R1   | Cysteine/tyrosine-r<br>ich 1                                   | 5.<br>75<br>15<br>9 | 6.<br>26<br>39<br>3 | 6.<br>53<br>93<br>5 | 4.<br>62<br>11<br>7 | 5.<br>44<br>16<br>8 | 5.<br>55<br>97<br>8 | -1.<br>968<br>932<br>064 | -0.<br>977<br>413<br>333 | 1.9<br>68<br>93<br>20<br>64 | D<br>o<br>w<br>n | 0.0<br>12<br>39<br>06<br>41 | 0.9<br>30<br>85<br>92<br>11 |    |
| 43<br>11       | MM<br>E     | Membrane<br>metallo-endopeptid<br>ase                          | 3.<br>80<br>88      | 3.<br>56<br>77      | 3.<br>39<br>99      | 4.<br>87<br>21      | 4.<br>02<br>09      | 4.<br>42<br>28      | 1.7<br>981<br>084        | 0.8<br>464<br>8          | 1.7<br>98<br>10             | U<br>p           | 0.0<br>05<br>65             | 0.9<br>30<br>85             |    |

|    |      |                     |    |    |    |    |    |    |     |     |     |   |     |     |
|----|------|---------------------|----|----|----|----|----|----|-----|-----|-----|---|-----|-----|
|    |      |                     | 5  |    | 1  | 3  |    | 7  | 04  |     | 84  |   | 09  | 92  |
|    |      |                     |    |    |    |    |    |    |     |     | 04  |   | 12  | 11  |
| 27 | FILI | Filamin A           | 4. | 5. | 6. | 3. | 5. | 3. | -2. | -1. | 2.8 | D | 0.0 | 0.9 |
| 14 | P1   | interacting protein | 96 | 87 | 62 | 53 | 66 | 67 | 887 | 529 | 87  | o | 40  | 30  |
| 5  |      | 1                   | 15 | 89 | 89 | 79 | 77 | 47 | 184 | 663 | 18  | w | 53  | 85  |
|    |      |                     | 8  | 2  |    |    | 3  | 8  | 56  | 333 | 45  | n | 79  | 92  |
|    |      |                     |    |    |    |    |    |    |     |     | 6   |   | 5   | 11  |
| 79 | CPE  | Cadherin-like and   | 7. | 8. | 8. | 5. | 7. | 6. | -2. | -1. | 2.6 | D | 0.0 | 0.9 |
| 97 | D1   | PC-esterase         | 03 | 04 | 33 | 49 | 46 | 27 | 624 | 391 | 24  | o | 29  | 30  |
| 4  |      | domain containing   | 72 | 35 | 23 | 76 | 5  | 50 | 113 | 83  | 11  | w | 13  | 85  |
|    |      | 1                   | 5  | 8  | 4  | 5  |    | 3  | 279 |     | 32  | n | 42  | 92  |
|    |      |                     |    |    |    |    |    |    |     |     | 79  |   | 2   | 11  |
| 64 | SVIL | Supervillin         | 6. | 6. | 7. | 5. | 6. | 6. | -1. | -0. | 1.8 | D | 0.0 | 0.9 |
| 59 | P1   | pseudogene 1        | 13 | 72 | 48 | 26 | 09 | 24 | 885 | 915 | 85  | o | 45  | 30  |
| 54 |      |                     | 68 | 36 | 93 | 31 | 22 | 84 | 987 | 32  | 98  | w | 34  | 85  |
|    |      |                     | 8  | 2  | 5  | 7  | 6  | 6  | 351 |     | 73  | n | 38  | 92  |
|    |      |                     |    |    |    |    |    |    |     |     | 51  |   | 89  | 11  |
| 29 | SCHI | Schwannomin         | 4. | 5. | 4. | 4. | 4. | 4. | -1. | -0. | 1.6 | D | 0.0 | 0.9 |
| 97 | P1   | interacting protein | 55 | 25 | 92 | 02 | 25 | 39 | 607 | 684 | 07  | o | 09  | 30  |
| 0  |      | 1                   | 75 | 84 | 18 | 64 | 97 | 80 | 230 | 576 | 23  | w | 85  | 85  |
|    |      |                     | 6  | 1  | 8  | 1  |    | 1  | 299 | 667 | 02  | n | 40  | 92  |
|    |      |                     |    |    |    |    |    |    |     |     | 99  |   | 85  | 11  |
| 44 | MT1  | Metallothionein 1E  | 7. | 7. | 7. | 8. | 7. | 8. | 1.7 | 0.7 | 1.7 | U | 0.0 | 0.9 |
| 93 | E    |                     | 94 | 51 | 04 | 43 | 89 | 49 | 109 | 748 | 10  | p | 19  | 30  |
|    |      |                     | 03 | 53 | 7  | 86 | 77 | 07 | 686 | 133 | 96  |   | 76  | 85  |
|    |      |                     | 2  | 1  |    | 4  | 1  | 2  | 59  | 33  | 86  |   | 93  | 92  |
|    |      |                     |    |    |    |    |    |    |     |     | 59  |   | 4   | 11  |
| 80 | CEP  | Centrosomal         | 6. | 6. | 6. | 7. | 7. | 6. | 1.5 | 0.6 | 1.5 | U | 0.0 | 0.9 |
| 32 | 70   | protein 70kda       | 87 | 35 | 54 | 63 | 22 | 73 | 216 | 056 | 21  | p | 45  | 30  |

|                |            |                                                             |                     |                     |                     |                      |                     |                     |                          |                          |                             |                  |                             |                             |
|----------------|------------|-------------------------------------------------------------|---------------------|---------------------|---------------------|----------------------|---------------------|---------------------|--------------------------|--------------------------|-----------------------------|------------------|-----------------------------|-----------------------------|
| 1              |            |                                                             | 01<br>8             | 87<br>6             | 85<br>9             | 20<br>8              | 96<br>1             | 28<br>8             | 958<br>2                 | 8                        | 69<br>58<br>2               |                  | 07<br>60<br>9               | 85<br>92<br>11              |
| 40<br>13<br>87 | LRR<br>D1  | Leucine-rich<br>repeats and death<br>domain containing<br>1 | 6.<br>82<br>62<br>7 | 6.<br>38<br>18<br>6 | 7.<br>46<br>44<br>4 | 6.<br>20<br>27<br>6  | 5.<br>68<br>49<br>4 | 6.<br>53<br>61<br>5 | -1.<br>681<br>295<br>526 | -0.<br>749<br>573<br>333 | 1.6<br>81<br>29<br>55<br>26 | D<br>o<br>w<br>n | 0.0<br>47<br>63<br>27<br>03 | 0.9<br>30<br>85<br>92<br>11 |
| 72<br>99<br>93 | SHIS<br>A9 | Shisa family<br>member 9                                    | 7.<br>13<br>93<br>3 | 6.<br>74<br>95<br>8 | 6.<br>56<br>14<br>1 | 7.<br>41<br>61<br>8  | 7.<br>60<br>66<br>2 | 7.<br>32<br>09<br>3 | 1.5<br>487<br>847<br>65  | 0.6<br>311<br>366<br>67  | 1.5<br>48<br>78<br>47<br>65 | U<br>p           | 0.0<br>10<br>80<br>32<br>2  | 0.9<br>30<br>85<br>92<br>11 |
| 84<br>83       | CILP       | Cartilage<br>intermediate layer<br>protein                  | 4.<br>01<br>86<br>7 | 6.<br>59<br>39<br>2 | 5.<br>14<br>13<br>8 | 6.<br>89<br>51<br>6  | 7.<br>22<br>79<br>7 | 9.<br>20<br>58<br>7 | 5.7<br>556<br>811<br>26  | 2.5<br>249<br>866<br>67  | 5.7<br>55<br>68<br>11<br>26 | U<br>p           | 0.0<br>11<br>48<br>42<br>6  | 0.9<br>30<br>85<br>92<br>11 |
| 44<br>96       | MT1<br>H   | Metallothionein 1H                                          | 9.<br>56<br>62<br>8 | 7.<br>26<br>63<br>3 | 6.<br>22<br>33<br>7 | 10<br>.3<br>30<br>29 | 9.<br>48<br>09<br>5 | 9.<br>95<br>36<br>9 | 4.7<br>119<br>252<br>96  | 2.2<br>363<br>166<br>67  | 4.7<br>11<br>92<br>52<br>96 | U<br>p           | 0.0<br>18<br>26<br>06<br>89 | 0.9<br>30<br>85<br>92<br>11 |
| 37<br>2        | ARC<br>N1  | Archain 1                                                   | 5.<br>76<br>74<br>8 | 6.<br>03<br>91<br>8 | 6.<br>19<br>08<br>6 | 5.<br>56<br>67<br>7  | 5.<br>12<br>17<br>6 | 5.<br>54<br>88<br>6 | -1.<br>501<br>838<br>832 | -0.<br>586<br>73<br>88   | 1.5<br>01<br>83<br>88<br>32 | D<br>o<br>w<br>n | 0.0<br>15<br>26<br>56<br>24 | 0.9<br>30<br>85<br>92<br>11 |
| 63             | PRD        | PR domain                                                   | 5.                  | 6.                  | 6.                  | 5.                   | 5.                  | 5.                  | -1.                      | -0.                      | 1.7                         | D                | 0.0                         | 0.9                         |

|               |            |                                                               |                     |                     |                     |                     |                     |                     |                          |                              |                             |                  |                             |                             |
|---------------|------------|---------------------------------------------------------------|---------------------|---------------------|---------------------|---------------------|---------------------|---------------------|--------------------------|------------------------------|-----------------------------|------------------|-----------------------------|-----------------------------|
| 9             | M1         | containing 1, with<br>ZNF domain                              | 88<br>30<br>2       | 18<br>64<br>5       | 57<br>33<br>8       | 07<br>57<br>5       | 55<br>16<br>5       | 54<br>89<br>7       | 768<br>071<br>56         | 822<br>176<br>667            | 68<br>07<br>15<br>6         | o<br>w<br>n      | 07<br>02<br>43<br>51        | 30<br>85<br>92<br>11        |
| 16<br>54      | DDX<br>3X  | DEAD<br>(Asp-Glu-Ala-Asp)<br>box helicase 3,<br>X-linked      | 5.<br>02<br>44<br>8 | 5.<br>07<br>23<br>6 | 5.<br>10<br>31<br>8 | 4.<br>72<br>38<br>7 | 3.<br>95<br>26<br>5 | 4.<br>17<br>26<br>4 | -1.<br>721<br>444<br>895 | -0.<br>783<br>62<br>48<br>95 | 1.7<br>21<br>44<br>48<br>95 | D<br>o<br>w<br>n | 0.0<br>05<br>15<br>66<br>63 | 0.9<br>30<br>85<br>92<br>11 |
| 54<br>46<br>9 | ZFA<br>ND6 | Zinc finger,<br>AN1-type domain<br>6                          | 7.<br>00<br>63<br>8 | 7.<br>03<br>75<br>1 | 7.<br>34<br>07<br>6 | 6.<br>72<br>69<br>8 | 5.<br>87<br>27<br>6 | 6.<br>75<br>87<br>6 | -1.<br>597<br>021<br>055 | -0.<br>675<br>383<br>333     | 1.5<br>97<br>02<br>10<br>55 | D<br>o<br>w<br>n | 0.0<br>32<br>54<br>27<br>83 | 0.9<br>30<br>85<br>92<br>11 |
| 84<br>23<br>0 | LRR<br>C8C | Leucine-rich repeat<br>containing 8 family<br>member C        | 5.<br>98<br>32<br>9 | 6.<br>46<br>11<br>8 | 6.<br>55<br>77<br>8 | 5.<br>55<br>09<br>4 | 6.<br>02<br>14<br>7 | 5.<br>15<br>55<br>2 | -1.<br>691<br>238<br>354 | -0.<br>758<br>08<br>354      | 1.6<br>91<br>23<br>83<br>54 | D<br>o<br>w<br>n | 0.0<br>19<br>56<br>23<br>22 | 0.9<br>30<br>85<br>92<br>11 |
| 29<br>11<br>6 | MYL<br>IP  | Myosin regulatory<br>light chain<br>interacting protein       | 7.<br>50<br>72<br>6 | 8.<br>06<br>07<br>7 | 8.<br>00<br>21<br>3 | 7.<br>41<br>04<br>4 | 6.<br>70<br>04<br>2 | 7.<br>50<br>98<br>9 | -1.<br>568<br>954<br>303 | -0.<br>649<br>803<br>333     | 1.5<br>68<br>95<br>43<br>03 | D<br>o<br>w<br>n | 0.0<br>37<br>12<br>21<br>66 | 0.9<br>30<br>85<br>92<br>11 |
| 63<br>35      | SCN<br>9A  | Sodium channel,<br>voltage gated, type<br>IX $\alpha$ subunit | 5.<br>18<br>41<br>5 | 4.<br>56<br>08<br>2 | 4.<br>52<br>95<br>7 | 5.<br>83<br>91<br>8 | 5.<br>28<br>11<br>7 | 5.<br>92<br>91<br>1 | 1.8<br>986<br>491<br>47  | 0.9<br>249<br>733<br>33      | 1.8<br>98<br>64<br>91<br>47 | U<br>p           | 0.0<br>06<br>05<br>48<br>37 | 0.9<br>30<br>85<br>92<br>11 |



|               |           |                                                                    |                     |                     |                     |                     |                     |                     |                          |                          |                        |                  |                       |                       |
|---------------|-----------|--------------------------------------------------------------------|---------------------|---------------------|---------------------|---------------------|---------------------|---------------------|--------------------------|--------------------------|------------------------|------------------|-----------------------|-----------------------|
| 37<br>91      | KDR       | Kinase insert<br>domain receptor                                   | 7.<br>15<br>37<br>3 | 6.<br>96<br>77<br>1 | 7.<br>49<br>39<br>1 | 5.<br>83<br>73<br>5 | 6.<br>82<br>88<br>5 | 6.<br>75<br>87<br>9 | -1.<br>658<br>777<br>059 | -0.<br>730<br>12<br>70   | 1.6<br>58<br>77<br>70  | D<br>o<br>w<br>n | 0.0<br>36<br>31<br>97 | 0.9<br>30<br>85<br>92 |
| 23<br>21      | FLT1      | Fms-related<br>tyrosine kinase 1                                   | 5.<br>23<br>60<br>4 | 5.<br>21<br>36<br>5 | 6.<br>02<br>82<br>8 | 3.<br>96<br>06<br>8 | 4.<br>10<br>08<br>9 | 4.<br>94<br>42<br>1 | -2.<br>230<br>504<br>409 | -1.<br>157<br>37<br>44   | 2.2<br>30<br>50<br>44  | D<br>o<br>w<br>n | 0.0<br>07<br>18<br>05 | 0.9<br>30<br>85<br>92 |
| 11<br>33<br>1 | PHB<br>2  | Prohibitin 2                                                       | 8.<br>33<br>69<br>4 | 8.<br>67<br>42<br>9 | 9.<br>04<br>05<br>6 | 8.<br>04<br>72<br>8 | 7.<br>70<br>99<br>4 | 8.<br>45<br>08<br>3 | -1.<br>531<br>112<br>192 | -0.<br>614<br>58<br>19   | 1.5<br>311<br>12<br>19 | D<br>o<br>w<br>n | 0.0<br>38<br>70<br>20 | 0.9<br>30<br>85<br>92 |
| 74<br>12      | VCA<br>M1 | Vascular cell<br>adhesion molecule<br>1                            | 5.<br>57<br>69<br>5 | 5.<br>23<br>89<br>5 | 5.<br>75<br>01<br>2 | 3.<br>82<br>17<br>3 | 4.<br>24<br>45<br>8 | 4.<br>58<br>00<br>1 | -2.<br>473<br>521<br>889 | -1.<br>306<br>566<br>667 | 2.4<br>73<br>52<br>18  | D<br>o<br>w<br>n | 0.0<br>00<br>48<br>96 | 0.9<br>30<br>85<br>92 |
| 49<br>73      | OLR<br>1  | Oxidized low<br>density lipoprotein<br>(lectin-like)<br>receptor 1 | 6.<br>03<br>98<br>8 | 7.<br>08<br>64<br>9 | 6.<br>28<br>81<br>6 | 5.<br>23<br>60<br>1 | 5.<br>47<br>94<br>5 | 6.<br>19<br>11<br>1 | -1.<br>785<br>077<br>445 | -0.<br>835<br>986<br>667 | 1.7<br>85<br>07<br>74  | D<br>o<br>w<br>n | 0.0<br>38<br>69<br>24 | 0.9<br>30<br>85<br>92 |
| 57<br>60<br>2 | USP<br>36 | Ubiquitin specific<br>peptidase 36                                 | 5.<br>88<br>86      | 5.<br>67<br>31<br>5 | 4.<br>90<br>71<br>1 | 6.<br>75<br>76<br>6 | 6.<br>47<br>87<br>8 | 5.<br>74<br>42<br>8 | 1.7<br>866<br>866<br>88  | 0.8<br>372<br>866<br>67  | 1.7<br>86<br>68<br>66  | U<br>p           | 0.0<br>37<br>76<br>18 | 0.9<br>30<br>85<br>92 |

|    |      |                    |    |    |    |    |    |    |     |     |     |    |     |     |    |
|----|------|--------------------|----|----|----|----|----|----|-----|-----|-----|----|-----|-----|----|
|    |      |                    |    |    |    |    |    |    |     |     |     | 88 |     | 8   | 11 |
| 98 | CEP  | Centrosomal        | 5. | 4. | 4. | 5. | 6. | 5. | 2.0 | 1.0 | 2.0 | U  | 0.0 | 0.9 |    |
| 57 | 350  | protein 350kda     | 81 | 92 | 41 | 51 | 80 | 85 | 128 | 092 | 12  | p  | 46  | 30  |    |
|    |      |                    | 62 | 18 | 78 | 94 | 47 | 95 | 644 | 5   | 86  |    | 86  | 85  |    |
|    |      |                    | 9  | 1  | 6  | 4  | 5  | 2  | 2   |     | 44  |    | 41  | 92  |    |
|    |      |                    |    |    |    |    |    |    |     |     | 2   |    | 81  | 11  |    |
| 57 | ZNF  | Zinc finger,       | 7. | 6. | 6. | 7. | 7. | 7. | 1.5 | 0.6 | 1.5 | U  | 0.0 | 0.9 |    |
| 16 | X1   | NFX1-type          | 17 | 93 | 29 | 40 | 73 | 11 | 307 | 142 | 30  | p  | 49  | 30  |    |
| 9  |      | containing 1       | 13 | 48 | 87 | 03 | 38 | 34 | 832 | 7   | 78  |    | 22  | 85  |    |
|    |      |                    |    | 4  | 7  | 9  | 5  | 8  | 29  |     | 32  |    | 45  | 92  |    |
|    |      |                    |    |    |    |    |    |    |     |     | 29  |    | 79  | 11  |    |
| 10 | LOC  | Uncharacterized    | 10 | 8. | 8. | 10 | 10 | 10 | 2.3 | 1.2 | 2.3 | U  | 0.0 | 0.9 |    |
| 05 | 1005 | LOC100507412       | .4 | 84 | 21 | .4 | .6 | .1 | 585 | 378 | 58  | p  | 40  | 30  |    |
| 07 | 0741 |                    | 32 | 04 | 69 | 63 | 32 | 06 | 333 | 9   | 53  |    | 94  | 85  |    |
| 41 | 2    |                    | 04 | 7  | 8  | 88 | 79 | 49 | 48  |     | 33  |    | 85  | 92  |    |
| 2  |      |                    |    |    |    |    |    |    |     |     | 48  |    | 57  | 11  |    |
| 90 | KLH  | Kelch like family  | 7. | 7. | 7. | 5. | 6. | 6. | -2. | -1. | 2.0 | D  | 0.0 | 0.9 |    |
| 29 | L13  | member 13          | 07 | 30 | 44 | 66 | 80 | 30 | 026 | 019 | 26  | o  | 07  | 30  |    |
| 3  |      |                    | 82 | 78 | 09 | 14 | 35 | 50 | 523 | 006 | 52  | w  | 59  | 85  |    |
|    |      |                    | 8  | 8  |    | 6  | 5  | 3  | 165 | 667 | 31  | n  | 23  | 92  |    |
|    |      |                    |    |    |    |    |    |    |     |     | 65  |    | 29  | 11  |    |
| 55 | CDK  | CDK5 regulatory    | 7. | 6. | 6. | 7. | 8. | 7. | 2.0 | 1.0 | 2.0 | U  | 0.0 | 0.9 |    |
| 75 | 5RA  | subunit associated | 33 | 09 | 93 | 81 | 18 | 40 | 248 | 177 | 24  | p  | 17  | 30  |    |
| 5  | P2   | protein 2          | 02 | 62 | 22 | 45 | 78 | 97 | 055 | 833 | 80  |    | 12  | 85  |    |
|    |      |                    | 7  | 1  | 9  | 3  | 5  | 4  | 03  | 33  | 55  |    | 39  | 92  |    |
|    |      |                    |    |    |    |    |    |    |     |     | 03  |    | 16  | 11  |    |
| 10 | FER  | Fermitin family    | 4. | 4. | 5. | 3. | 4. | 3. | -1. | -0. | 1.6 | D  | 0.0 | 0.9 |    |
| 97 | MT2  | member 2           | 11 | 70 | 42 | 93 | 10 | 93 | 689 | 756 | 89  | o  | 36  | 30  |    |
| 9  |      |                    | 09 | 87 | 45 | 43 | 08 | 90 | 543 | 633 | 54  | w  | 27  | 85  |    |

|    |      |                     |    |    |    |    |    |    |     |     |     |   |     |     |
|----|------|---------------------|----|----|----|----|----|----|-----|-----|-----|---|-----|-----|
|    |      |                     |    | 3  | 5  | 4  | 9  | 5  | 31  | 333 | 33  | n | 65  | 92  |
|    |      |                     |    |    |    |    |    |    |     |     | 1   |   | 01  | 11  |
| 60 | MRP  | Mitochondrial       | 7. | 7. | 7. | 7. | 6. | 7. | -1. | -0. | 1.5 | D | 0.0 | 0.9 |
| 48 | S35  | ribosomal protein   | 38 | 33 | 81 | 05 | 56 | 02 | 544 | 627 | 44  | o | 16  | 30  |
| 8  |      | S35                 | 45 | 05 | 24 | 97 | 42 | 13 | 771 | 393 | 77  | w | 48  | 85  |
|    |      |                     | 5  | 9  | 2  | 7  | 5  | 6  | 372 | 333 | 13  | n | 85  | 92  |
|    |      |                     |    |    |    |    |    |    |     |     | 72  |   | 5   | 11  |
| 25 | SDH  | Succinate           | 9. | 9. | 10 | 9. | 9. | 9. | -1. | -0. | 1.5 | D | 0.0 | 0.9 |
| 58 | AP1  | dehydrogenase       | 64 | 91 | .0 | 48 | 02 | 14 | 571 | 652 | 71  | o | 06  | 30  |
| 12 |      | complex subunit A,  | 26 | 69 | 53 | 21 | 82 | 54 | 737 | 36  | 73  | w | 23  | 85  |
|    |      | flavoprotein        | 8  | 4  | 34 | 6  | 7  | 5  | 185 |     | 71  | n | 94  | 92  |
|    |      | pseudogene 1        |    |    |    |    |    |    |     |     | 85  |   | 1   | 11  |
| 84 | ZNF  | Zinc finger protein | 7. | 6. | 7. | 8. | 7. | 7. | 1.6 | 0.7 | 1.6 | U | 0.0 | 0.9 |
| 91 | 587  | 587                 | 31 | 82 | 15 | 23 | 69 | 64 | 979 | 637 | 97  | p | 07  | 30  |
| 4  |      |                     | 08 | 56 | 15 | 83 | 52 | 57 | 178 | 666 | 91  |   | 92  | 85  |
|    |      |                     | 4  | 3  | 9  | 5  | 5  | 6  | 59  | 67  | 78  |   | 17  | 92  |
|    |      |                     |    |    |    |    |    |    |     |     | 59  |   | 61  | 11  |
| 65 | SLC  | Solute carrier      | 6. | 7. | 7. | 4. | 7. | 5. | -3. | -1. | 3.2 | D | 0.0 | 0.9 |
| 46 | 8A1  | family 8            | 55 | 56 | 69 | 17 | 21 | 34 | 239 | 695 | 39  | o | 44  | 30  |
|    |      | (sodium/calcium     | 35 | 97 | 82 | 87 | 04 | 50 | 482 | 763 | 48  | w | 05  | 85  |
|    |      | exchanger),         | 3  | 9  | 3  | 9  | 1  | 6  | 431 | 333 | 24  | n | 09  | 92  |
|    |      | member 1            |    |    |    |    |    |    |     |     | 31  |   | 91  | 11  |
| 34 | APO  | Apolipoprotein E    | 9. | 9. | 9. | 8. | 8. | 9. | -2. | -1. | 2.0 | D | 0.0 | 0.9 |
| 8  | E    |                     | 71 | 79 | 85 | 08 | 98 | 08 | 098 | 069 | 98  | o | 03  | 30  |
|    |      |                     | 51 | 48 | 65 | 91 | 35 | 59 | 473 | 34  | 47  | w | 67  | 85  |
|    |      |                     | 5  | 6  | 8  | 1  | 1  | 5  | 144 |     | 31  | n | 53  | 92  |
|    |      |                     |    |    |    |    |    |    |     |     | 44  |   | 86  | 11  |
| 78 | COL  | Collectin subfamily | 8. | 8. | 9. | 6. | 8. | 7. | -2. | -1. | 2.6 | D | 0.0 | 0.9 |
| 98 | EC11 | member 11           | 73 | 84 | 37 | 99 | 73 | 08 | 604 | 381 | 04  | o | 16  | 30  |

|                |           |                                    |                     |                     |                     |                     |                     |                     |                          |                          |                             |                  |                             |                             |
|----------------|-----------|------------------------------------|---------------------|---------------------|---------------------|---------------------|---------------------|---------------------|--------------------------|--------------------------|-----------------------------|------------------|-----------------------------|-----------------------------|
| 9              |           |                                    | 80<br>9             | 68<br>7             | 41<br>4             | 67<br>7             | 84<br>4             | 05<br>1             | 717<br>06                | 126<br>667               | 71<br>70<br>6               | w<br>n           | 63<br>99                    | 85<br>92<br>11              |
| 74<br>32       | VIP       | Vasoactive<br>intestinal peptide   | 6.<br>43<br>48<br>7 | 7.<br>14<br>49<br>6 | 5.<br>42<br>68<br>4 | 4.<br>39<br>45<br>5 | 5.<br>38<br>10<br>9 | 4.<br>29<br>33<br>7 | -3.<br>129<br>401<br>282 | -1.<br>645<br>886<br>667 | 3.1<br>29<br>40<br>12<br>82 | D<br>o<br>w<br>n | 0.0<br>07<br>64<br>31<br>14 | 0.9<br>30<br>85<br>92<br>11 |
| 25<br>70<br>19 | FRM<br>D3 | FERM domain<br>containing 3        | 4.<br>60<br>52<br>9 | 4.<br>88<br>08<br>9 | 5.<br>08<br>51<br>2 | 4.<br>29<br>26<br>2 | 4.<br>26<br>43<br>8 | 4.<br>07<br>43<br>8 | -1.<br>566<br>049<br>702 | -0.<br>647<br>13<br>97   | 1.5<br>66<br>04<br>97<br>02 | D<br>o<br>w<br>n | 0.0<br>03<br>82<br>68<br>46 | 0.9<br>30<br>85<br>92<br>11 |
| 23<br>48       | FOL<br>R1 | Folate receptor 1<br>(adult)       | 4.<br>73<br>40<br>4 | 4.<br>83<br>47<br>5 | 4.<br>56<br>69<br>7 | 5.<br>79<br>50<br>7 | 5.<br>43<br>32<br>8 | 5.<br>01<br>05<br>8 | 1.6<br>256<br>650<br>08  | 0.7<br>010<br>3<br>08    | 1.6<br>25<br>66<br>50<br>08 | U<br>p           | 0.0<br>11<br>35<br>75<br>03 | 0.9<br>30<br>85<br>92<br>11 |
| 63<br>57       | CCL<br>13 | Chemokine (C-C<br>motif) ligand 13 | 3.<br>92<br>64<br>4 | 3.<br>92<br>85<br>8 | 3.<br>74<br>06<br>2 | 4.<br>19<br>72<br>7 | 4.<br>63<br>38<br>7 | 4.<br>58<br>22<br>1 | 1.5<br>219<br>314<br>02  | 0.6<br>059<br>033<br>33  | 1.5<br>21<br>93<br>14<br>02 | U<br>p           | 0.0<br>04<br>29<br>30<br>55 | 0.9<br>30<br>85<br>92<br>11 |
| 65<br>25       | SMT<br>N  | Smoothelin                         | 6.<br>41<br>53      | 6.<br>71<br>89<br>1 | 7.<br>72<br>32<br>6 | 5.<br>57<br>87<br>6 | 6.<br>44<br>38<br>7 | 5.<br>74<br>90<br>9 | -2.<br>040<br>020<br>053 | -1.<br>028<br>583<br>333 | 2.0<br>40<br>02<br>00<br>53 | D<br>o<br>w<br>n | 0.0<br>24<br>68<br>95<br>22 | 0.9<br>30<br>85<br>92<br>11 |
| 79             | ZDH       | Zinc finger,                       | 6.                  | 7.                  | 6.                  | 8.                  | 7.                  | 7.                  | 2.0                      | 1.0                      | 2.0                         | U                | 0.0                         | 0.9                         |

|    |     |                  |    |    |    |    |    |    |     |     |     |   |     |     |
|----|-----|------------------|----|----|----|----|----|----|-----|-----|-----|---|-----|-----|
| 84 | HC1 | DHHC-type        | 91 | 05 | 68 | 66 | 61 | 44 | 350 | 250 | 35  | p | 12  | 30  |
| 4  | 1   | containing 11    | 36 | 02 | 32 | 03 | 54 | 65 | 769 | 833 | 07  |   | 07  | 85  |
|    |     |                  | 3  | 3  |    | 4  | 6  | 1  | 31  | 33  | 69  |   | 18  | 92  |
|    |     |                  |    |    |    |    |    |    |     |     | 31  |   | 84  | 11  |
| 98 | POM | POM121           | 6. | 6. | 6. | 6. | 7. | 7. | 1.5 | 0.6 | 1.5 | U | 0.0 | 0.9 |
| 83 | 121 | transmembrane    | 93 | 35 | 04 | 85 | 32 | 06 | 534 | 354 | 53  | p | 35  | 30  |
|    |     | nucleoporin      | 23 | 22 | 64 | 11 | 10 | 53 | 473 | 733 | 44  |   | 44  | 85  |
|    |     |                  | 9  | 1  | 9  | 3  | 3  | 5  | 36  | 33  | 73  |   | 52  | 92  |
|    |     |                  |    |    |    |    |    |    |     |     | 36  |   | 56  | 11  |
| 53 | PKM | Pyruvate kinase, | 8. | 8. | 9. | 8. | 7. | 7. | -1. | -0. | 1.9 | D | 0.0 | 0.9 |
| 15 |     | muscle           | 68 | 21 | 26 | 13 | 34 | 81 | 938 | 954 | 38  | o | 14  | 30  |
|    |     |                  | 50 | 72 | 38 | 63 | 86 | 70 | 145 | 676 | 14  | w | 08  | 85  |
|    |     |                  | 1  |    | 9  | 7  | 3  | 7  | 213 | 667 | 52  | n | 81  | 92  |
|    |     |                  |    |    |    |    |    |    |     |     | 13  |   | 26  | 11  |
| 54 | GRA | GRAM domain      | 4. | 4. | 4. | 3. | 3. | 3. | -1. | -0. | 1.6 | D | 0.0 | 0.9 |
| 76 | MD1 | containing 1C    | 07 | 33 | 28 | 59 | 11 | 94 | 602 | 680 | 02  | o | 12  | 30  |
| 2  | C   |                  | 71 | 33 | 72 | 08 | 63 | 89 | 746 | 546 | 74  | w | 28  | 85  |
|    |     |                  | 4  | 7  | 5  | 6  | 1  | 5  | 954 | 667 | 69  | n | 50  | 92  |
|    |     |                  |    |    |    |    |    |    |     |     | 54  |   | 25  | 11  |
| 46 | NAR | Asparaginyl-trna | 6. | 6. | 7. | 5. | 5. | 5. | -2. | -1. | 2.1 | D | 0.0 | 0.9 |
| 77 | S   | synthetase       | 24 | 52 | 14 | 88 | 03 | 67 | 151 | 105 | 51  | o | 06  | 30  |
|    |     |                  | 57 | 98 | 17 | 77 | 43 | 98 | 088 | 066 | 08  | w | 41  | 85  |
|    |     |                  |    | 2  | 1  | 8  | 6  | 9  | 18  | 667 | 81  | n | 00  | 92  |
|    |     |                  |    |    |    |    |    |    |     |     | 8   |   | 16  | 11  |
| 48 | NPY | Neuropeptide Y   | 6. | 6. | 7. | 5. | 6. | 5. | -2. | -1. | 2.2 | D | 0.0 | 0.9 |
| 52 |     |                  | 84 | 56 | 13 | 45 | 06 | 53 | 242 | 165 | 42  | o | 00  | 30  |
|    |     |                  | 77 | 34 | 45 | 48 | 34 | 16 | 746 | 266 | 74  | w | 97  | 85  |
|    |     |                  | 6  | 1  | 7  | 3  | 3  | 8  | 665 | 667 | 66  | n | 62  | 92  |
|    |     |                  |    |    |    |    |    |    |     |     | 65  |   | 05  | 11  |

|                |            |                                                           |                     |                     |                     |                     |                     |                     |                          |                             |                             |                  |                             |                             |
|----------------|------------|-----------------------------------------------------------|---------------------|---------------------|---------------------|---------------------|---------------------|---------------------|--------------------------|-----------------------------|-----------------------------|------------------|-----------------------------|-----------------------------|
| 77<br>1        | CA1<br>2   | Carbonic<br>anhydrase XII                                 | 7.<br>56<br>62<br>5 | 6.<br>47<br>46<br>2 | 6.<br>29<br>00<br>1 | 7.<br>46<br>37<br>1 | 7.<br>97<br>11<br>5 | 7.<br>58<br>65<br>6 | 1.8<br>619<br>917<br>32  | 0.8<br>968<br>466<br>67     | 1.8<br>61<br>99<br>17<br>32 | U<br>p           | 0.0<br>29<br>21<br>51<br>29 | 0.9<br>30<br>85<br>92<br>11 |
| 90<br>42<br>7  | BMF        | Bcl2 modifying<br>factor                                  | 6.<br>96<br>49<br>9 | 7.<br>93<br>22<br>6 | 7.<br>13<br>02<br>4 | 6.<br>12<br>56<br>6 | 6.<br>99<br>02<br>1 | 6.<br>59<br>20<br>2 | -1.<br>709<br>056<br>391 | -0.<br>773<br>2<br>63<br>91 | 1.7<br>09<br>05<br>63<br>91 | D<br>o<br>w<br>n | 0.0<br>38<br>92<br>02<br>25 | 0.9<br>30<br>85<br>92<br>11 |
| 39<br>77       | LIFR       | Leukemia<br>inhibitory factor<br>receptor $\alpha$        | 6.<br>09<br>06<br>3 | 6.<br>29<br>96<br>4 | 5.<br>55<br>71<br>7 | 5.<br>36<br>69<br>8 | 4.<br>75<br>16<br>4 | 5.<br>01<br>13<br>2 | -1.<br>917<br>420<br>373 | -0.<br>939<br>166<br>667    | 1.9<br>17<br>42<br>03<br>73 | D<br>o<br>w<br>n | 0.0<br>05<br>06<br>96<br>53 | 0.9<br>30<br>85<br>92<br>11 |
| 22<br>09<br>65 | FAM<br>13C | Family with<br>sequence similarity<br>13 member C         | 5.<br>24<br>94      | 6.<br>35<br>05<br>3 | 6.<br>53<br>23<br>5 | 4.<br>17<br>58<br>7 | 4.<br>37<br>47<br>8 | 5.<br>40<br>12<br>4 | -2.<br>627<br>085<br>826 | -1.<br>393<br>463<br>333    | 2.6<br>27<br>08<br>58<br>26 | D<br>o<br>w<br>n | 0.0<br>11<br>21<br>52<br>4  | 0.9<br>30<br>85<br>92<br>11 |
| 51<br>71<br>9  | CAB<br>39  | Calcium binding<br>protein 39                             | 3.<br>91<br>62<br>3 | 4.<br>02<br>84<br>8 | 4.<br>76<br>25<br>4 | 3.<br>88<br>71<br>2 | 2.<br>79<br>25<br>8 | 3.<br>66<br>67<br>2 | -1.<br>725<br>414<br>916 | -0.<br>786<br>943<br>333    | 1.7<br>25<br>41<br>49<br>16 | D<br>o<br>w<br>n | 0.0<br>42<br>91<br>92<br>25 | 0.9<br>30<br>85<br>92<br>11 |
| 40<br>6        | ARN<br>TL  | Aryl hydrocarbon<br>receptor nuclear<br>translocator like | 6.<br>83<br>68<br>6 | 7.<br>01<br>19<br>4 | 6.<br>59<br>32<br>5 | 5.<br>36<br>51<br>5 | 6.<br>33<br>48<br>5 | 4.<br>77<br>13<br>7 | -2.<br>502<br>858<br>39  | -1.<br>323<br>576<br>667    | 2.5<br>02<br>85<br>83       | D<br>o<br>w<br>n | 0.0<br>07<br>37<br>75       | 0.9<br>30<br>85<br>92       |

|                |             |                                                                 |                     |                     |                     |                     |                     |                     |                          |                          |                             |                  |                             |                             |
|----------------|-------------|-----------------------------------------------------------------|---------------------|---------------------|---------------------|---------------------|---------------------|---------------------|--------------------------|--------------------------|-----------------------------|------------------|-----------------------------|-----------------------------|
|                |             |                                                                 |                     |                     |                     |                     |                     |                     |                          |                          | 9                           |                  | 48                          | 11                          |
| 51<br>05<br>0  | PI15        | Peptidase inhibitor<br>15                                       | 3.<br>87<br>49<br>3 | 4.<br>08<br>72<br>3 | 5.<br>61<br>02<br>3 | 3.<br>19<br>85<br>2 | 3.<br>86<br>2       | 3.<br>46<br>19<br>2 | -2.<br>023<br>215<br>507 | -1.<br>016<br>65         | 2.0<br>23<br>21<br>55<br>07 | D<br>o<br>w<br>n | 0.0<br>47<br>98<br>89<br>88 | 0.9<br>30<br>85<br>92<br>11 |
| 23<br>16       | FLN<br>A    | Filamin A, $\alpha$                                             | 8.<br>12<br>92<br>2 | 8.<br>99<br>41<br>9 | 9.<br>44<br>57<br>9 | 5.<br>78<br>56<br>7 | 8.<br>62<br>80<br>3 | 6.<br>55<br>83      | -3.<br>644<br>531<br>408 | -1.<br>865<br>733<br>333 | 3.6<br>44<br>53<br>14<br>08 | D<br>o<br>w<br>n | 0.0<br>27<br>68<br>70<br>15 | 0.9<br>30<br>85<br>92<br>11 |
| 79<br>79<br>9  | UGT<br>2A3  | UDP<br>glucuronosyltransf<br>erases 2 family,<br>polypeptide A3 | 7.<br>58<br>62<br>9 | 8.<br>23<br>63<br>8 | 8.<br>86<br>28<br>8 | 7.<br>46<br>82<br>5 | 5.<br>63<br>02<br>2 | 6.<br>70<br>59      | -3.<br>088<br>828<br>99  | -1.<br>627<br>06         | 3.0<br>88<br>82<br>89<br>9  | D<br>o<br>w<br>n | 0.0<br>10<br>94<br>32<br>13 | 0.9<br>30<br>85<br>92<br>11 |
| 60<br>48<br>1  | ELO<br>VL5  | ELOVL fatty acid<br>elongase 5                                  | 5.<br>59<br>84<br>3 | 5.<br>70<br>58<br>3 | 6.<br>38<br>10<br>7 | 5.<br>09<br>12<br>7 | 4.<br>66<br>77      | 5.<br>06<br>96<br>7 | -1.<br>934<br>861<br>098 | -0.<br>952<br>23         | 1.9<br>34<br>86<br>10<br>98 | D<br>o<br>w<br>n | 0.0<br>04<br>46<br>50<br>3  | 0.9<br>30<br>85<br>92<br>11 |
| 85<br>48<br>0  | TSL<br>P    | Thymic stromal<br>lymphopoietin                                 | 4.<br>08<br>52<br>1 | 4.<br>73<br>80<br>9 | 5.<br>44<br>15<br>6 | 3.<br>00<br>72<br>8 | 3.<br>91<br>71<br>2 | 3.<br>19<br>29<br>8 | -2.<br>607<br>185<br>68  | -1.<br>382<br>493<br>333 | 2.6<br>07<br>18<br>56<br>8  | D<br>o<br>w<br>n | 0.0<br>05<br>63<br>31<br>8  | 0.9<br>30<br>85<br>92<br>11 |
| 44<br>03<br>66 | HER<br>C2P8 | Hect domain and<br>RLD 2 pseudogene<br>8                        | 7.<br>13<br>93      | 6.<br>74<br>95      | 6.<br>56<br>14      | 7.<br>41<br>61      | 7.<br>60<br>66      | 7.<br>32<br>09      | 1.5<br>487<br>847        | 0.6<br>311<br>366        | 1.5<br>48<br>78             | U<br>p           | 0.0<br>10<br>80             | 0.9<br>30<br>85             |

|    |      |                      |    |    |    |    |    |    |     |     |     |   |     |     |
|----|------|----------------------|----|----|----|----|----|----|-----|-----|-----|---|-----|-----|
|    |      |                      | 3  | 8  | 1  | 8  | 2  | 3  | 65  | 67  | 47  |   | 32  | 92  |
|    |      |                      |    |    |    |    |    |    |     |     | 65  |   | 2   | 11  |
| 65 | HLT  | Helicase-like        | 4. | 4. | 5. | 3. | 3. | 4. | -1. | -0. | 1.5 | D | 0.0 | 0.9 |
| 96 | F    | transcription factor | 20 | 54 | 00 | 96 | 43 | 35 | 584 | 663 | 84  | o | 45  | 30  |
|    |      |                      | 27 | 70 | 22 | 82 | 42 | 79 | 348 | 89  | 34  | w | 16  | 85  |
|    |      |                      | 1  | 4  | 9  | 1  | 4  | 2  | 817 |     | 88  | n | 59  | 92  |
|    |      |                      |    |    |    |    |    |    |     |     | 17  |   | 43  | 11  |
| 22 | PDC  | Programmed cell      | 5. | 5. | 5. | 6. | 6. | 5. | 1.5 | 0.6 | 1.5 | U | 0.0 | 0.9 |
| 98 | D11  | death 11             | 79 | 47 | 49 | 13 | 51 | 92 | 205 | 046 | 20  | p | 15  | 30  |
| 4  |      |                      | 15 | 56 | 86 | 76 | 44 | 76 | 606 | 033 | 56  |   | 12  | 85  |
|    |      |                      | 3  | 7  | 8  | 4  | 3  | 2  | 2   | 33  | 06  |   | 23  | 92  |
|    |      |                      |    |    |    |    |    |    |     |     | 2   |   | 8   | 11  |
| 23 | FOS  | FOS-like antigen 2   | 7. | 7. | 7. | 7. | 6. | 7. | -1. | -0. | 1.5 | D | 0.0 | 0.9 |
| 55 | L2   |                      | 33 | 99 | 76 | 19 | 72 | 24 | 561 | 643 | 61  | o | 22  | 30  |
|    |      |                      | 32 | 82 | 34 | 76 | 29 | 43 | 908 | 31  | 90  | w | 42  | 85  |
|    |      |                      | 3  | 3  | 2  | 3  | 5  | 7  | 565 |     | 85  | n | 33  | 92  |
|    |      |                      |    |    |    |    |    |    |     |     | 65  |   | 32  | 11  |
| 84 | RGS  | Regulator of         | 6. | 6. | 7. | 4. | 5. | 6. | -3. | -1. | 3.0 | D | 0.0 | 0.9 |
| 90 | 5    | G-protein signaling  | 83 | 84 | 73 | 84 | 67 | 02 | 081 | 623 | 81  | o | 02  | 30  |
|    |      | 5                    | 50 | 04 | 87 | 38 | 49 | 43 | 672 | 713 | 67  | w | 19  | 85  |
|    |      |                      | 9  | 4  | 1  | 6  | 3  | 1  | 038 | 333 | 20  | n | 44  | 92  |
|    |      |                      |    |    |    |    |    |    |     |     | 38  |   | 33  | 11  |
| 10 | HER  | Hect domain and      | 7. | 6. | 6. | 7. | 7. | 7. | 1.5 | 0.6 | 1.5 | U | 0.0 | 0.9 |
| 02 | C2P4 | RLD 2 pseudogene     | 13 | 74 | 56 | 41 | 60 | 32 | 487 | 311 | 48  | p | 10  | 30  |
| 89 |      | 4                    | 93 | 95 | 14 | 61 | 66 | 09 | 847 | 366 | 78  |   | 80  | 85  |
| 57 |      |                      | 3  | 8  | 1  | 8  | 2  | 3  | 65  | 67  | 47  |   | 32  | 92  |
| 4  |      |                      |    |    |    |    |    |    |     |     | 65  |   | 2   | 11  |
| 25 | QPC  | Glutaminyl-peptide   | 4. | 4. | 4. | 3. | 3. | 3. | -1. | -0. | 1.7 | D | 0.0 | 0.9 |
| 79 | T    | cyclotransferase     | 26 | 49 | 74 | 60 | 75 | 85 | 702 | 767 | 02  | o | 01  | 30  |



|               |            |                                                                     |                     |                     |                     |                      |                      |                     |                          |                             |                             |                  |                             |                             |
|---------------|------------|---------------------------------------------------------------------|---------------------|---------------------|---------------------|----------------------|----------------------|---------------------|--------------------------|-----------------------------|-----------------------------|------------------|-----------------------------|-----------------------------|
| 7             |            |                                                                     | 57<br>1             | 76<br>4             | 67<br>5             | 17<br>3              | 26                   | 24<br>1             | 655<br>623               | 786<br>667                  | 65<br>56<br>23              | w<br>n           | 21<br>02<br>37              | 85<br>92<br>11              |
| 71<br>50      | TOP<br>1   | Topoisomerase<br>(DNA) I                                            | 9.<br>71<br>98<br>6 | 9.<br>57<br>03<br>5 | 8.<br>83<br>66<br>1 | 10<br>.2<br>00<br>24 | 10<br>.0<br>13<br>09 | 9.<br>80<br>00<br>1 | 1.5<br>463<br>211<br>73  | 0.6<br>288<br>4<br>11<br>73 | 1.5<br>46<br>32<br>11<br>73 | U<br>p           | 0.0<br>33<br>47<br>19<br>96 | 0.9<br>30<br>85<br>92<br>11 |
| 55<br>78<br>4 | MCT<br>P2  | Multiple C2<br>domains,<br>transmembrane 2                          | 7.<br>17<br>42<br>4 | 6.<br>89<br>99<br>8 | 7.<br>00<br>00<br>5 | 7.<br>97<br>56<br>9  | 7.<br>53<br>40<br>6  | 7.<br>65<br>32<br>9 | 1.6<br>202<br>951<br>85  | 0.6<br>962<br>566<br>67     | 1.6<br>20<br>29<br>51<br>85 | U<br>p           | 0.0<br>03<br>80<br>24<br>47 | 0.9<br>30<br>85<br>92<br>11 |
| 88<br>35      | SOC<br>S2  | Suppressor of<br>cytokine signaling<br>2                            | 5.<br>47<br>5       | 6.<br>08<br>11<br>3 | 6.<br>66<br>06<br>7 | 4.<br>41<br>94<br>5  | 5.<br>19<br>30<br>9  | 5.<br>59<br>61      | -2.<br>003<br>774<br>277 | -1.<br>002<br>72            | 2.0<br>03<br>77<br>42<br>77 | D<br>o<br>w<br>n | 0.0<br>29<br>28<br>76<br>02 | 0.9<br>30<br>85<br>92<br>11 |
| 22<br>02      | EFE<br>MP1 | EGF containing<br>fibulin-like<br>extracellular matrix<br>protein 1 | 4.<br>33<br>99<br>1 | 6.<br>55<br>95<br>8 | 5.<br>98<br>50<br>9 | 6.<br>45<br>19<br>5  | 7.<br>78<br>91<br>8  | 8.<br>59<br>29<br>7 | 3.9<br>536<br>175<br>87  | 1.9<br>831<br>733<br>33     | 3.9<br>53<br>61<br>75<br>87 | U<br>p           | 0.0<br>19<br>67<br>95<br>55 | 0.9<br>30<br>85<br>92<br>11 |
| 25<br>80<br>2 | LMO<br>D1  | Leiomodin 1<br>(smooth muscle)                                      | 4.<br>82<br>34<br>9 | 5.<br>20<br>92<br>1 | 5.<br>60<br>57<br>9 | 4.<br>27<br>37<br>5  | 4.<br>99<br>38<br>1  | 4.<br>48<br>64<br>7 | -1.<br>545<br>585<br>359 | -0.<br>628<br>153<br>333    | 1.5<br>45<br>58<br>53<br>59 | D<br>o<br>w<br>n | 0.0<br>40<br>06<br>31<br>65 | 0.9<br>30<br>85<br>92<br>11 |
| 12            | KLH        | Kelch domain                                                        | 6.                  | 6.                  | 6.                  | 5.                   | 5.                   | 6.                  | -1.                      | -0.                         | 1.5                         | D                | 0.0                         | 0.9                         |

|    |     |                           |    |    |    |    |    |    |     |     |     |   |     |     |
|----|-----|---------------------------|----|----|----|----|----|----|-----|-----|-----|---|-----|-----|
| 68 | DC9 | containing 9              | 34 | 42 | 33 | 69 | 40 | 05 | 572 | 653 | 72  | o | 09  | 30  |
| 23 |     |                           | 78 | 53 | 91 | 50 | 48 | 19 | 954 | 476 | 95  | w | 19  | 85  |
|    |     |                           | 2  | 8  | 3  | 4  | 8  | 8  | 203 | 667 | 42  | n | 82  | 92  |
|    |     |                           |    |    |    |    |    |    |     |     | 03  |   | 8   | 11  |
| 70 | TEK | TEK tyrosine              | 5. | 6. | 6. | 4. | 5. | 5. | -1. | -0. | 1.9 | D | 0.0 | 0.9 |
| 10 |     | kinase, endothelial       | 72 | 35 | 93 | 92 | 61 | 66 | 914 | 937 | 14  | o | 24  | 30  |
|    |     |                           | 29 | 16 | 91 | 07 | 51 | 63 | 741 | 15  | 74  | w | 24  | 85  |
|    |     |                           | 4  | 3  | 9  | 4  | 9  | 8  | 986 |     | 19  | n | 28  | 92  |
|    |     |                           |    |    |    |    |    |    |     |     | 86  |   | 63  | 11  |
| 63 | SDC | Syndecan 2                | 5. | 5. | 6. | 4. | 4. | 5. | -2. | -1. | 2.0 | D | 0.0 | 0.9 |
| 83 | 2   |                           | 01 | 98 | 14 | 23 | 70 | 06 | 063 | 045 | 63  | o | 14  | 30  |
|    |     |                           | 67 | 59 | 63 | 71 | 77 | 91 | 414 | 033 | 41  | w | 71  | 85  |
|    |     |                           | 1  | 9  | 6  |    | 3  | 3  | 033 | 333 | 40  | n | 87  | 92  |
|    |     |                           |    |    |    |    |    |    |     |     | 33  |   | 39  | 11  |
| 14 | PRI | Proline rich              | 5. | 5. | 5. | 4. | 4. | 5. | -1. | -0. | 1.5 | D | 0.0 | 0.9 |
| 52 | MA1 | membrane anchor           | 39 | 81 | 76 | 68 | 83 | 56 | 548 | 631 | 48  | o | 37  | 30  |
| 70 | 1   |                           | 86 | 39 | 63 | 81 | 73 | 01 | 698 | 056 | 69  | w | 04  | 85  |
|    |     |                           | 3  | 2  | 6  | 9  | 9  | 6  | 885 | 667 | 88  | n | 16  | 92  |
|    |     |                           |    |    |    |    |    |    |     |     | 85  |   | 25  | 11  |
| 23 | RYB | RING1 and YY1             | 8. | 8. | 8. | 8. | 7. | 7. | -1. | -0. | 1.5 | D | 0.0 | 0.9 |
| 42 | P   | binding protein           | 04 | 76 | 32 | 00 | 35 | 98 | 511 | 596 | 11  | o | 44  | 30  |
| 9  |     |                           | 92 | 50 | 03 | 32 | 81 | 49 | 652 | 126 | 65  | w | 89  | 85  |
|    |     |                           | 9  | 1  | 3  | 2  |    | 3  | 644 | 667 | 26  | n | 55  | 92  |
|    |     |                           |    |    |    |    |    |    |     |     | 44  |   | 57  | 11  |
| 10 | TUB | Tubulin, $\gamma$ complex | 3. | 4. | 4. | 3. | 3. | 3. | -1. | -0. | 1.5 | D | 0.0 | 0.9 |
| 42 | GCP | associated protein        | 79 | 20 | 45 | 84 | 41 | 41 | 507 | 592 | 07  | o | 18  | 30  |
| 6  | 3   | 3                         | 97 | 07 | 72 | 95 | 86 | 28 | 554 | 21  | 55  | w | 89  | 85  |
|    |     |                           | 4  | 3  | 4  | 3  | 9  | 6  | 335 |     | 43  | n | 90  | 92  |
|    |     |                           |    |    |    |    |    |    |     |     | 35  |   | 54  | 11  |

|                |            |                                               |                      |                      |                      |                      |                      |                     |                          |                          |                             |                  |                             |                             |
|----------------|------------|-----------------------------------------------|----------------------|----------------------|----------------------|----------------------|----------------------|---------------------|--------------------------|--------------------------|-----------------------------|------------------|-----------------------------|-----------------------------|
| 90<br>1        | CCN<br>G2  | Cyclin G2                                     | 5.<br>36<br>01<br>8  | 5.<br>62<br>05<br>7  | 5.<br>57<br>78<br>9  | 4.<br>68<br>81<br>9  | 4.<br>48<br>63<br>3  | 5.<br>26<br>27<br>8 | -1.<br>632<br>534<br>334 | -0.<br>707<br>113<br>333 | 1.6<br>32<br>53<br>43<br>34 | D<br>o<br>w<br>n | 0.0<br>12<br>10<br>25<br>54 | 0.9<br>30<br>85<br>92<br>11 |
| 10<br>84<br>1  | FTC<br>D   | Formimidoyltransf<br>erases<br>cyclodeaminase | 6.<br>04<br>31       | 4.<br>99<br>39       | 5.<br>37<br>32       | 5.<br>90<br>56<br>6  | 6.<br>12<br>32<br>7  | 6.<br>35<br>13<br>4 | 1.5<br>764<br>615<br>69  | 0.6<br>566<br>9<br>69    | 1.5<br>76<br>46<br>15<br>69 | U<br>p           | 0.0<br>44<br>40<br>74<br>86 | 0.9<br>30<br>85<br>92<br>11 |
| 60             | ACT<br>B   | Actin, $\beta$                                | 11<br>.2<br>13<br>43 | 11<br>.6<br>69<br>84 | 11<br>.9<br>42<br>89 | 11<br>.3<br>59<br>16 | 10<br>.6<br>52<br>28 | 10<br>.9<br>31<br>7 | -1.<br>545<br>071<br>212 | -0.<br>627<br>673<br>333 | 1.5<br>45<br>07<br>12<br>12 | D<br>o<br>w<br>n | 0.0<br>30<br>54<br>53<br>59 | 0.9<br>30<br>85<br>92<br>11 |
| 18<br>2        | JAG<br>1   | Jagged 1                                      | 4.<br>65<br>96<br>1  | 5.<br>05<br>46       | 5.<br>51<br>03<br>5  | 4.<br>39<br>05<br>7  | 3.<br>95<br>26<br>5  | 4.<br>76<br>60<br>4 | -1.<br>630<br>257<br>662 | -0.<br>705<br>1<br>662   | 1.6<br>30<br>25<br>76<br>62 | D<br>o<br>w<br>n | 0.0<br>33<br>24<br>68<br>57 | 0.9<br>30<br>85<br>92<br>11 |
| 72<br>84<br>11 | GUS<br>BP1 | Glucuronidase, $\beta$<br>pseudogene 1        | 6.<br>54<br>03       | 6.<br>28<br>58<br>2  | 6.<br>15<br>84<br>1  | 6.<br>77<br>27<br>8  | 7.<br>35<br>11       | 6.<br>74<br>81<br>8 | 1.5<br>466<br>820<br>64  | 0.6<br>291<br>766<br>67  | 1.5<br>46<br>68<br>20<br>64 | U<br>p           | 0.0<br>18<br>01<br>60<br>71 | 0.9<br>30<br>85<br>92<br>11 |
| 31<br>76       | HN<br>MT   | Histamine<br>N-methyltransferase              | 8.<br>23<br>05<br>4  | 8.<br>03<br>93<br>7  | 7.<br>56<br>62<br>7  | 8.<br>88<br>05<br>4  | 8.<br>47<br>13<br>3  | 8.<br>37<br>47<br>7 | 1.5<br>477<br>294<br>81  | 0.6<br>301<br>533<br>33  | 1.5<br>47<br>72<br>94       | U<br>p           | 0.0<br>21<br>92<br>81       | 0.9<br>30<br>85<br>92       |

|    |      |                      |    |    |    |    |    |    |     |     |     |    |     |     |    |
|----|------|----------------------|----|----|----|----|----|----|-----|-----|-----|----|-----|-----|----|
|    |      |                      |    |    |    |    |    |    |     |     |     | 81 |     | 44  | 11 |
| 48 | NRC  | Neuronal cell        | 8. | 8. | 9. | 9. | 9. | 9. | 1.5 | 0.6 | 1.5 | U  | 0.0 | 0.9 |    |
| 97 | AM   | adhesion molecule    | 56 | 46 | 00 | 62 | 09 | 13 | 252 | 09  | 25  | p  | 19  | 30  |    |
|    |      |                      | 36 | 67 | 14 | 1  | 92 | 84 | 016 |     | 20  |    | 82  | 85  |    |
|    |      |                      |    | 1  | 5  |    | 9  | 7  | 53  |     | 16  |    | 91  | 92  |    |
|    |      |                      |    |    |    |    |    |    |     |     | 53  |    | 36  | 11  |    |
| 10 | MYL  | Myosin light chain   | 9. | 10 | 10 | 7. | 9. | 7. | -3. | -1. | 3.4 | D  | 0.0 | 0.9 |    |
| 39 | 9    | 9                    | 63 | .0 | .8 | 26 | 93 | 97 | 479 | 798 | 79  | o  | 25  | 30  |    |
| 8  |      |                      | 38 | 43 | 95 | 35 | 55 | 72 | 709 | 966 | 70  | w  | 41  | 85  |    |
|    |      |                      | 1  | 5  | 97 | 8  | 4  | 6  | 012 | 667 | 90  | n  | 90  | 92  |    |
|    |      |                      |    |    |    |    |    |    |     |     | 12  |    | 33  | 11  |    |
| 41 | MBN  | Muscleblind like     | 4. | 4. | 5. | 4. | 3. | 3. | -2. | -1. | 2.0 | D  | 0.0 | 0.9 |    |
| 54 | L1   | splicing regulator 1 | 23 | 69 | 24 | 04 | 20 | 92 | 005 | 004 | 05  | o  | 11  | 30  |    |
|    |      |                      | 79 | 70 | 88 | 10 | 40 | 63 | 752 | 143 | 75  | w  | 44  | 85  |    |
|    |      |                      | 9  | 6  | 2  | 2  | 7  | 5  | 136 | 333 | 21  | n  | 70  | 92  |    |
|    |      |                      |    |    |    |    |    |    |     |     | 36  |    | 38  | 11  |    |
| 44 | AKR  | Aldo-keto            | 11 | 11 | 11 | 10 | 10 | 11 | -1. | -0. | 1.6 | D  | 0.0 | 0.9 |    |
| 12 | 1B15 | reductase family 1,  | .6 | .2 | .8 | .5 | .8 | .1 | 610 | 687 | 10  | o  | 09  | 30  |    |
| 82 |      | member B15           | 06 | 89 | 29 | 69 | 98 | 94 | 806 | 783 | 80  | w  | 67  | 85  |    |
|    |      |                      | 77 | 22 | 75 | 48 | 64 | 27 | 65  | 333 | 66  | n  | 63  | 92  |    |
|    |      |                      |    |    |    |    |    |    |     |     | 5   |    | 43  | 11  |    |
| 54 | RNF  | Ring finger protein  | 4. | 3. | 4. | 4. | 4. | 4. | 1.5 | 0.5 | 1.5 | U  | 0.0 | 0.9 |    |
| 89 | 43   | 43                   | 07 | 68 | 20 | 79 | 42 | 49 | 000 | 850 | 00  | p  | 10  | 30  |    |
| 4  |      |                      | 02 | 62 | 30 | 49 | 58 | 39 | 979 | 566 | 09  |    | 93  | 85  |    |
|    |      |                      | 1  | 9  | 5  | 6  | 4  | 2  | 09  | 67  | 79  |    | 06  | 92  |    |
|    |      |                      |    |    |    |    |    |    |     |     | 09  |    | 56  | 11  |    |
| 21 | FBL  | Fibulin 2            | 5. | 7. | 6. | 7. | 7. | 8. | 2.5 | 1.3 | 2.5 | U  | 0.0 | 0.9 |    |
| 99 | N2   |                      | 47 | 24 | 19 | 01 | 60 | 36 | 660 | 595 | 66  | p  | 24  | 30  |    |
|    |      |                      | 24 | 25 | 01 | 54 | 13 | 68 | 097 | 266 | 00  |    | 39  | 85  |    |

|    |     |                      |    |    |    |    |    |    |     |     |     |   |     |     |
|----|-----|----------------------|----|----|----|----|----|----|-----|-----|-----|---|-----|-----|
|    |     |                      | 2  | 2  | 7  | 6  | 8  | 5  | 76  | 67  | 97  |   | 73  | 92  |
|    |     |                      |    |    |    |    |    |    |     |     | 76  |   | 18  | 11  |
| 15 | CBW | COBW domain          | 4. | 3. | 4. | 3. | 3. | 3. | -1. | -0. | 1.6 | D | 0.0 | 0.9 |
| 04 | D2  | containing 2         | 45 | 86 | 15 | 71 | 32 | 19 | 674 | 744 | 74  | o | 05  | 30  |
| 72 |     |                      | 21 | 23 | 27 | 57 | 17 | 77 | 812 |     | 81  | w | 34  | 85  |
|    |     |                      | 2  | 7  | 1  | 4  | 2  | 4  | 975 |     | 29  | n | 61  | 92  |
|    |     |                      |    |    |    |    |    |    |     |     | 75  |   | 82  | 11  |
| 44 | MT1 | Metallothionein 1F   | 11 | 9. | 8. | 11 | 11 | 11 | 3.2 | 1.7 | 3.2 | U | 0.0 | 0.9 |
| 94 | F   |                      | .0 | 27 | 70 | .5 | .1 | .4 | 510 | 008 | 51  | p | 12  | 30  |
|    |     |                      | 27 | 08 | 54 | 44 | 51 | 09 | 145 | 9   | 01  |   | 64  | 85  |
|    |     |                      | 06 | 8  | 2  | 88 | 57 | 58 | 21  |     | 45  |   | 23  | 92  |
|    |     |                      |    |    |    |    |    |    |     |     | 21  |   | 3   | 11  |
| 33 | HSP | Heat shock protein   | 5. | 6. | 5. | 4. | 4. | 4. | -1. | -0. | 1.9 | D | 0.0 | 0.9 |
| 06 | A2  | family A (Hsp70)     | 08 | 11 | 88 | 94 | 49 | 73 | 956 | 968 | 56  | o | 08  | 30  |
|    |     | member 2             | 11 | 40 | 50 | 91 | 32 | 25 | 678 | 406 | 67  | w | 47  | 85  |
|    |     |                      |    | 4  | 6  | 7  | 3  | 8  | 417 | 667 | 84  | n | 53  | 92  |
|    |     |                      |    |    |    |    |    |    |     |     | 17  |   | 91  | 11  |
| 64 | SEL | Selectin P           | 6. | 6. | 7. | 5. | 5. | 6. | -1. | -0. | 1.7 | D | 0.0 | 0.9 |
| 03 | P   |                      | 38 | 99 | 19 | 54 | 97 | 55 | 784 | 835 | 84  | o | 26  | 30  |
|    |     |                      | 62 | 91 | 57 | 35 | 74 | 45 | 112 | 206 | 11  | w | 85  | 85  |
|    |     |                      | 5  | 9  | 2  |    | 6  | 8  | 595 | 667 | 25  | n | 52  | 92  |
|    |     |                      |    |    |    |    |    |    |     |     | 95  |   | 32  | 11  |
| 10 | SPO | Spondin 1,           | 6. | 6. | 7. | 3. | 6. | 4. | -3. | -1. | 3.3 | D | 0.0 | 0.9 |
| 41 | N1  | extracellular matrix | 32 | 90 | 80 | 95 | 89 | 88 | 399 | 765 | 99  | o | 39  | 30  |
| 8  |     | protein              | 21 | 54 | 2  | 37 | 19 | 77 | 658 | 39  | 65  | w | 86  | 85  |
|    |     |                      | 9  | 1  |    | 2  | 4  | 7  | 893 |     | 88  | n | 71  | 92  |
|    |     |                      |    |    |    |    |    |    |     |     | 93  |   | 79  | 11  |
| 10 | OLF | Olfactomedin 4       | 3. | 3. | 5. | 6. | 5. | 5. | 3.3 | 1.7 | 3.3 | U | 0.0 | 0.9 |
| 56 | M4  |                      | 99 | 00 | 20 | 67 | 16 | 53 | 045 | 244 | 04  | p | 18  | 30  |

|                |                 |                                                                             |                     |                     |                     |                     |                     |                     |                          |                          |                             |                  |                             |                             |
|----------------|-----------------|-----------------------------------------------------------------------------|---------------------|---------------------|---------------------|---------------------|---------------------|---------------------|--------------------------|--------------------------|-----------------------------|------------------|-----------------------------|-----------------------------|
| 2              |                 |                                                                             | 01<br>6             | 60<br>4             | 53<br>6             | 41<br>3             | 97<br>3             | 11                  | 794<br>15                | 666<br>67                | 57<br>94<br>15              |                  | 57<br>00<br>13              | 85<br>92<br>11              |
| 22<br>73       | FHL<br>1        | Four and a half<br>LIM domains 1                                            | 6.<br>15<br>91<br>1 | 7.<br>26<br>17<br>2 | 7.<br>60<br>13<br>7 | 4.<br>53<br>93<br>2 | 6.<br>27<br>62<br>4 | 6.<br>09<br>41<br>9 | -2.<br>586<br>169<br>2   | -1.<br>370<br>816<br>667 | 2.5<br>86<br>16<br>92       | D<br>o<br>w<br>n | 0.0<br>32<br>51<br>73<br>23 | 0.9<br>30<br>85<br>92<br>11 |
| 16<br>11<br>98 | CLE<br>C14<br>A | C-type lectin<br>domain family 14,<br>member A                              | 5.<br>90<br>59<br>6 | 6.<br>17<br>50<br>3 | 6.<br>24<br>88<br>5 | 5.<br>21<br>44<br>6 | 5.<br>13<br>91<br>2 | 5.<br>68<br>80<br>2 | -1.<br>696<br>717<br>838 | -0.<br>762<br>746<br>667 | 1.6<br>96<br>71<br>78<br>38 | D<br>o<br>w<br>n | 0.0<br>04<br>77<br>13<br>72 | 0.9<br>30<br>85<br>92<br>11 |
| 28<br>39<br>70 | PDX<br>DC2<br>P | Pyridoxal-depende<br>nt decarboxylase<br>domain containing<br>2, pseudogene | 5.<br>15<br>31      | 5.<br>57<br>97<br>5 | 6.<br>33<br>36<br>7 | 4.<br>89<br>51<br>7 | 4.<br>32<br>09      | 5.<br>20<br>72<br>5 | -1.<br>841<br>706<br>712 | -0.<br>881<br>043<br>333 | 1.8<br>41<br>70<br>67<br>12 | D<br>o<br>w<br>n | 0.0<br>31<br>97<br>36<br>18 | 0.9<br>30<br>85<br>92<br>11 |
| 12<br>42<br>22 | PAQ<br>R4       | Progesterin and<br>adipoq receptor<br>family member IV                      | 7.<br>26<br>42<br>9 | 7.<br>23<br>02<br>2 | 7.<br>51<br>48<br>7 | 8.<br>99<br>00<br>7 | 7.<br>73<br>40<br>9 | 8.<br>13<br>28      | 1.9<br>308<br>240<br>03  | 0.9<br>492<br>166<br>67  | 1.9<br>30<br>82<br>40<br>03 | U<br>p           | 0.0<br>14<br>96<br>13<br>29 | 0.9<br>30<br>85<br>92<br>11 |
| 56<br>55       | KLK<br>10       | Kallikrein related<br>peptidase 10                                          | 8.<br>71<br>14<br>6 | 8.<br>57<br>99<br>4 | 8.<br>91<br>96<br>8 | 7.<br>72<br>68<br>8 | 8.<br>08<br>35<br>6 | 8.<br>38<br>70<br>1 | -1.<br>592<br>407<br>973 | -0.<br>671<br>21<br>79   | 1.5<br>92<br>40<br>79<br>73 | D<br>o<br>w<br>n | 0.0<br>10<br>18<br>89<br>19 | 0.9<br>30<br>85<br>92<br>11 |
| 25             | FUT             | Fucosyltransferase                                                          | 4.                  | 5.                  | 5.                  | 4.                  | 4.                  | 4.                  | -1.                      | -0.                      | 1.5                         | D                | 0.0                         | 0.9                         |

|                           |                          |                                |                     |                     |                     |                     |                     |                          |                          |                              |                             |                  |                             |                             |
|---------------------------|--------------------------|--------------------------------|---------------------|---------------------|---------------------|---------------------|---------------------|--------------------------|--------------------------|------------------------------|-----------------------------|------------------|-----------------------------|-----------------------------|
| 30                        | 8                        | 8 (α (1,6) fucosyltransferase) | 84<br>75<br>3       | 23<br>61<br>5       | 51<br>10<br>2       | 69<br>09<br>3       | 41<br>53<br>6       | 61<br>09<br>9            | 543<br>073<br>376        | 625<br>806<br>667            | 43<br>07<br>33<br>76        | o<br>w<br>n      | 12<br>26<br>17<br>19        | 30<br>85<br>92<br>11        |
| 10<br>05<br>27<br>97<br>8 | TME<br>M56-<br>RWD<br>D3 | TMEM56-RWDD3<br>readthrough    | 5.<br>89<br>43<br>1 | 5.<br>86<br>80<br>1 | 6.<br>65<br>24<br>5 | 5.<br>37<br>69<br>9 | 5.<br>04<br>31<br>1 | 5.<br>84<br>50<br>5      | -1.<br>643<br>236<br>349 | -0.<br>716<br>54<br>63<br>49 | 1.6<br>43<br>23<br>63<br>49 | D<br>o<br>w<br>n | 0.0<br>36<br>14<br>35<br>53 | 0.9<br>30<br>85<br>92<br>11 |
| 85<br>47<br>7             | SCIN                     | Scinderin                      | 5.<br>46<br>97<br>4 | 6.<br>05<br>81<br>1 | 5.<br>95<br>79<br>1 | 6.<br>97<br>31<br>2 | 6.<br>18<br>37<br>5 | 6.<br>53<br>15<br>14     | 1.6<br>634<br>594<br>14  | 0.7<br>341<br>866<br>67      | 1.6<br>63<br>45<br>94<br>14 | U<br>p           | 0.0<br>19<br>28<br>09<br>9  | 0.9<br>30<br>85<br>92<br>11 |
| 23<br>19<br>3             | GAN<br>AB                | Glucosidase, α;<br>neutral AB  | 7.<br>53<br>74<br>9 | 7.<br>28<br>85<br>6 | 6.<br>91<br>90<br>3 | 6.<br>86<br>20<br>5 | 6.<br>45<br>20<br>9 | 6.<br>61<br>98<br>9      | -1.<br>520<br>325<br>251 | -0.<br>604<br>38<br>52<br>51 | 1.5<br>20<br>32<br>52<br>51 | D<br>o<br>w<br>n | 0.0<br>18<br>51<br>78<br>25 | 0.9<br>30<br>85<br>92<br>11 |
| 10<br>23<br>1             | RCA<br>N2                | Regulator of<br>calcineurin 2  | 6.<br>26<br>56      | 7.<br>58<br>97      | 7.<br>70<br>95      | 4.<br>24<br>57<br>5 | 6.<br>03<br>14<br>3 | 6.<br>36<br>39<br>4<br>2 | -3.1<br>193<br>670<br>75 | -1.<br>641<br>253<br>333     | 3.1<br>19<br>36<br>70<br>75 | D<br>o<br>w<br>n | 0.0<br>26<br>33<br>67<br>71 | 0.9<br>30<br>85<br>92<br>11 |
| 38<br>8                   | RHO<br>B                 | Ras homolog<br>family member B | 6.<br>05<br>48<br>4 | 7.<br>98<br>13<br>5 | 6.<br>76<br>43<br>5 | 6.<br>07<br>89<br>5 | 5.<br>63<br>72<br>5 | 5.<br>94<br>72<br>5      | -2.<br>064<br>386<br>832 | -1.<br>045<br>713<br>333     | 2.0<br>64<br>38<br>68<br>32 | D<br>o<br>w<br>n | 0.0<br>45<br>71<br>32<br>93 | 0.9<br>30<br>85<br>92<br>11 |

|    |      |                     |    |    |    |    |    |    |     |     |     |   |     |     |
|----|------|---------------------|----|----|----|----|----|----|-----|-----|-----|---|-----|-----|
| 10 | NPIP | Nuclear pore        | 5. | 5. | 6. | 4. | 4. | 5. | -1. | -0. | 1.8 | D | 0.0 | 0.9 |
| 10 | A7   | complex             | 15 | 57 | 33 | 89 | 32 | 20 | 841 | 881 | 41  | o | 31  | 30  |
| 59 |      | interacting protein | 31 | 97 | 36 | 51 | 09 | 72 | 706 | 043 | 70  | w | 97  | 85  |
| 93 |      | family member A7    |    | 5  |    | 7  |    | 5  | 712 | 333 | 67  | n | 36  | 92  |
| 8  |      |                     |    |    |    |    |    |    |     |     | 12  |   | 18  | 11  |
| 90 | CLD  | Claudin 2           | 9. | 7. | 9. | 10 | 9. | 9. | 2.2 | 1.1 | 2.2 | U | 0.0 | 0.9 |
| 75 | N2   |                     | 50 | 60 | 19 | .2 | 99 | 58 | 452 | 668 | 45  | p | 37  | 30  |
|    |      |                     | 76 | 25 | 75 | 29 | 57 | 28 | 353 | 666 | 23  |   | 46  | 85  |
|    |      |                     | 3  |    | 1  | 57 | 8  | 9  | 31  | 67  | 53  |   | 11  | 92  |
|    |      |                     |    |    |    |    |    |    |     |     | 31  |   | 52  | 11  |
| 86 | EIF3 | Eukaryotic          | 8. | 9. | 9. | 8. | 7. | 8. | -1. | -0. | 1.6 | D | 0.0 | 0.9 |
| 67 | H    | translation         | 60 | 04 | 38 | 53 | 68 | 65 | 644 | 718 | 44  | o | 45  | 30  |
|    |      | initiation factor 3 | 24 | 29 | 65 | 82 | 70 | 26 | 915 | 013 | 91  | w | 41  | 85  |
|    |      | subunit H           | 9  | 7  | 6  |    | 9  | 9  | 34  | 333 | 53  | n | 47  | 92  |
|    |      |                     |    |    |    |    |    |    |     |     | 4   |   | 9   | 11  |
| 31 | HLA  | Major               | 9. | 9. | 10 | 8. | 9. | 9. | -1. | -0. | 1.5 | D | 0.0 | 0.9 |
| 13 | -DPA | histocompatibility  | 45 | 71 | .4 | 80 | 36 | 44 | 573 | 653 | 73  | o | 48  | 30  |
|    | 1    | complex, class II,  | 46 | 72 | 07 | 2  | 73 | 86 | 270 | 766 | 27  | w | 02  | 85  |
|    |      | DP $\alpha$ 1       | 3  |    | 45 |    | 5  | 3  | 418 | 667 | 04  | n | 86  | 92  |
|    |      |                     |    |    |    |    |    |    |     |     | 18  |   | 31  | 11  |
| 38 | ZNF  | Zinc finger protein | 6. | 7. | 7. | 9. | 8. | 9. | 2.8 | 1.5 | 2.8 | U | 0.0 | 0.9 |
| 85 | 761  | 761                 | 91 | 91 | 83 | 35 | 26 | 61 | 743 | 232 | 74  | p | 05  | 30  |
| 61 |      |                     | 89 | 12 | 07 | 01 | 37 | 66 | 053 | 133 | 30  |   | 50  | 85  |
|    |      |                     | 7  | 1  | 7  | 4  | 9  | 6  | 49  | 33  | 53  |   | 54  | 92  |
|    |      |                     |    |    |    |    |    |    |     |     | 49  |   | 8   | 11  |
| 23 | AM   | A-methylacyl-coa    | 6. | 6. | 6. | 5. | 5. | 5. | -1. | -0. | 1.7 | D | 0.0 | 0.9 |
| 60 | ACR  | racemase            | 29 | 20 | 52 | 76 | 12 | 71 | 749 | 807 | 49  | o | 05  | 30  |
| 0  |      |                     | 64 | 38 | 27 | 15 | 54 | 42 | 925 | 293 | 92  | w | 17  | 85  |
|    |      |                     | 7  | 5  | 6  | 6  |    | 4  | 294 | 333 | 52  | n | 56  | 92  |



|               |           |                                                                             |                     |                     |                     |                     |                     |                     |                          |                          |                             |                  |                             |                             |
|---------------|-----------|-----------------------------------------------------------------------------|---------------------|---------------------|---------------------|---------------------|---------------------|---------------------|--------------------------|--------------------------|-----------------------------|------------------|-----------------------------|-----------------------------|
|               |           |                                                                             |                     |                     |                     |                     |                     |                     |                          |                          | 94                          |                  | 18                          | 11                          |
| 54<br>12      | UBL<br>3  | Ubiquitin like 3                                                            | 6.<br>55<br>77<br>4 | 6.<br>61<br>71<br>1 | 7.<br>00<br>53<br>1 | 6.<br>18<br>08<br>7 | 5.<br>12<br>83      | 6.<br>37<br>45<br>6 | -1.<br>780<br>328<br>335 | -0.<br>832<br>143<br>333 | 1.7<br>80<br>32<br>83<br>35 | D<br>o<br>w<br>n | 0.0<br>35<br>27<br>93<br>73 | 0.9<br>30<br>85<br>92<br>11 |
| 66<br>52      | SOR<br>D  | Sorbitol<br>dehydrogenase                                                   | 8.<br>31<br>27<br>6 | 8.<br>32<br>56<br>5 | 8.<br>34<br>15<br>1 | 7.<br>02<br>44<br>5 | 7.<br>52<br>06<br>1 | 7.<br>24<br>20<br>3 | -2.<br>091<br>121<br>178 | -1.<br>064<br>276<br>667 | 2.0<br>91<br>12<br>11<br>78 | D<br>o<br>w<br>n | 0.0<br>00<br>22<br>78<br>9  | 0.9<br>30<br>85<br>92<br>11 |
| 28<br>61      | GPR<br>37 | G protein-coupled<br>receptor<br>(endothelin<br>receptor<br>type<br>B-like) | 5.<br>61<br>59<br>6 | 6.<br>13<br>29      | 5.<br>47<br>76<br>5 | 5.<br>09<br>07<br>5 | 4.<br>81<br>41<br>4 | 5.<br>48<br>44<br>2 | -1.<br>528<br>800<br>335 | -0.<br>612<br>4<br>335   | 1.5<br>28<br>80<br>03<br>35 | D<br>o<br>w<br>n | 0.0<br>34<br>09<br>61<br>93 | 0.9<br>30<br>85<br>92<br>11 |
| 27<br>34<br>1 | RRP<br>7A | Ribosomal RNA<br>processing<br>homolog A                                    | 4.<br>40<br>87<br>8 | 4.<br>15<br>81<br>3 | 4.<br>12<br>62<br>4 | 4.<br>77<br>98<br>3 | 4.<br>70<br>75<br>8 | 5.<br>00<br>03<br>8 | 1.5<br>138<br>406<br>3   | 0.5<br>982<br>133<br>33  | 1.5<br>13<br>84<br>06<br>3  | U<br>p           | 0.0<br>03<br>47<br>86<br>35 | 0.9<br>30<br>85<br>92<br>11 |
| 40<br>92      | SMA<br>D7 | SMAD family<br>member 7                                                     | 4.<br>96<br>27<br>6 | 5.<br>74<br>94<br>1 | 5.<br>91<br>82      | 4.<br>01<br>87<br>2 | 4.<br>91<br>78      | 4.<br>77<br>06<br>7 | -1.<br>964<br>814<br>8   | -0.<br>974<br>393<br>333 | 1.9<br>64<br>81<br>48       | D<br>o<br>w<br>n | 0.0<br>16<br>28<br>01<br>12 | 0.9<br>30<br>85<br>92<br>11 |
| 94<br>72      | AKA<br>P6 | A-kinase anchoring<br>protein 6                                             | 5.<br>53<br>44      | 5.<br>72<br>25      | 6.<br>27<br>10      | 4.<br>69<br>25      | 4.<br>80<br>80      | 4.<br>68<br>46      | -2.<br>164<br>889        | -1.1<br>142<br>933       | 2.1<br>64<br>88             | D<br>o<br>w      | 0.0<br>00<br>71             | 0.9<br>30<br>85             |

|    |      |                      |    |    |    |    |    |    |     |     |     |   |     |     |
|----|------|----------------------|----|----|----|----|----|----|-----|-----|-----|---|-----|-----|
|    |      |                      | 6  | 6  | 2  |    | 3  | 3  | 416 | 33  | 94  | n | 58  | 92  |
|    |      |                      |    |    |    |    |    |    |     |     | 16  |   | 68  | 11  |
| 18 | DPY  | Dihydropyrimidina    | 3. | 5. | 5. | 2. | 4. | 3. | -2. | -1. | 2.6 | D | 0.0 | 0.9 |
| 09 | SL3  | se like 3            | 94 | 05 | 47 | 98 | 18 | 16 | 600 | 378 | 00  | o | 14  | 30  |
|    |      |                      | 27 | 79 | 41 | 75 | 96 | 10 | 579 | 833 | 57  | w | 97  | 85  |
|    |      |                      | 1  |    | 8  | 9  | 7  | 3  | 845 | 333 | 98  | n | 67  | 92  |
|    |      |                      |    |    |    |    |    |    |     |     | 45  |   | 68  | 11  |
| 15 | CYP  | Cytochrome P450,     | 6. | 6. | 7. | 6. | 5. | 6. | -1. | -0. | 1.6 | D | 0.0 | 0.9 |
| 95 | 51A1 | family 51,           | 82 | 38 | 46 | 20 | 68 | 53 | 681 | 749 | 81  | o | 47  | 30  |
|    |      | subfamily A,         | 62 | 18 | 44 | 27 | 49 | 61 | 295 | 573 | 29  | w | 63  | 85  |
|    |      | polypeptide 1        | 7  | 6  | 4  | 6  | 4  | 5  | 526 | 333 | 55  | n | 27  | 92  |
|    |      |                      |    |    |    |    |    |    |     |     | 26  |   | 03  | 11  |
| 74 | EIF4 | Eukaryotic           | 6. | 7. | 7. | 6. | 5. | 6. | -1. | -0. | 1.9 | D | 0.0 | 0.9 |
| 58 | H    | translation          | 68 | 31 | 31 | 76 | 55 | 20 | 908 | 932 | 08  | o | 21  | 30  |
|    |      | initiation factor 4H | 40 | 47 | 69 | 28 | 43 | 09 | 620 | 53  | 62  | w | 35  | 85  |
|    |      |                      | 4  | 2  | 1  | 5  |    | 3  | 138 |     | 01  | n | 25  | 92  |
|    |      |                      |    |    |    |    |    |    |     |     | 38  |   | 3   | 11  |
| 28 | TCA  | T cell activation    | 8. | 7. | 7. | 8. | 8. | 9. | 1.8 | 0.8 | 1.8 | U | 0.0 | 0.9 |
| 53 | IM   | inhibitor,           | 13 | 64 | 99 | 68 | 62 | 02 | 122 | 578 | 12  | p | 01  | 30  |
| 43 |      | mitochondrial        | 01 | 20 | 11 | 07 | 71 | 88 | 768 | 033 | 27  |   | 93  | 85  |
|    |      |                      | 3  | 3  | 1  |    |    | 8  | 12  | 33  | 68  |   | 10  | 92  |
|    |      |                      |    |    |    |    |    |    |     |     | 12  |   | 1   | 11  |
| 51 | LUC  | LUC7-like 3          | 7. | 8. | 7. | 8. | 9. | 8. | 1.8 | 0.8 | 1.8 | U | 0.0 | 0.9 |
| 74 | 7L3  | pre-mrna splicing    | 87 | 19 | 35 | 67 | 10 | 20 | 060 | 528 | 06  | p | 18  | 30  |
| 7  |      | factor               | 93 | 70 | 63 | 96 | 87 | 29 | 527 | 4   | 05  |   | 99  | 85  |
|    |      |                      | 9  | 2  | 3  | 2  | 3  | 1  | 12  |     | 27  |   | 11  | 92  |
|    |      |                      |    |    |    |    |    |    |     |     | 12  |   | 22  | 11  |
| 19 | PAO  | Polyamine oxidase    | 7. | 6. | 6. | 7. | 7. | 7. | 1.6 | 0.6 | 1.6 | U | 0.0 | 0.9 |
| 67 | X    | (exo-N4-amino)       | 24 | 79 | 63 | 73 | 79 | 22 | 169 | 932 | 16  | p | 16  | 30  |

|               |            |                                                                                                                     |                     |                     |                      |                     |                     |                     |                          |                              |                             |                  |                             |                             |
|---------------|------------|---------------------------------------------------------------------------------------------------------------------|---------------------|---------------------|----------------------|---------------------|---------------------|---------------------|--------------------------|------------------------------|-----------------------------|------------------|-----------------------------|-----------------------------|
| 43            |            |                                                                                                                     | 96<br>9             | 56<br>6             | 04<br>1              | 23<br>7             | 83                  | 49<br>3             | 555<br>28                | 8                            | 95<br>55<br>28              |                  | 78<br>36<br>77              | 85<br>92<br>11              |
| 95<br>32      | BAG<br>2   | BCL2 associated<br>athanogene 2                                                                                     | 4.<br>05<br>30<br>3 | 4.<br>07<br>71<br>4 | 5.<br>16<br>44<br>1  | 2.<br>99<br>71<br>3 | 3.<br>65<br>67<br>3 | 3.<br>83<br>60<br>9 | -1.<br>911<br>727<br>198 | -0.<br>934<br>876<br>667     | 1.9<br>11<br>72<br>71<br>98 | D<br>o<br>w<br>n | 0.0<br>25<br>86<br>61<br>61 | 0.9<br>30<br>85<br>92<br>11 |
| 27<br>29      | GCL<br>C   | Glutamate-cysteine<br>ligase, catalytic<br>subunit                                                                  | 6.<br>11<br>08<br>8 | 6.<br>29<br>77<br>1 | 6.<br>51<br>14<br>3  | 5.<br>46<br>14<br>8 | 5.<br>82<br>10<br>2 | 5.<br>85<br>13<br>5 | -1.<br>510<br>880<br>963 | -0.<br>595<br>39<br>09<br>63 | 1.5<br>10<br>88<br>09<br>63 | D<br>o<br>w<br>n | 0.0<br>11<br>20<br>31<br>31 | 0.9<br>30<br>85<br>92<br>11 |
| 49<br>8       | ATP5<br>A1 | ATP synthase, H <sup>+</sup><br>transporting,<br>mitochondrial F1<br>complex, $\alpha$ subunit<br>1, cardiac muscle | 9.<br>54<br>74<br>6 | 9.<br>85<br>71<br>6 | 10<br>.3<br>91<br>94 | 9.<br>32<br>10<br>2 | 8.<br>61<br>42<br>5 | 9.<br>21<br>59<br>2 | -1.<br>842<br>660<br>134 | -0.<br>881<br>79<br>01<br>34 | 1.8<br>42<br>66<br>01<br>34 | D<br>o<br>w<br>n | 0.0<br>11<br>31<br>73<br>35 | 0.9<br>30<br>85<br>92<br>11 |
| 27<br>29<br>5 | PDL1<br>M3 | PDZ and LIM<br>domain 3                                                                                             | 5.<br>72<br>42<br>8 | 6.<br>44<br>26<br>6 | 7.<br>40<br>17<br>1  | 3.<br>19<br>97<br>9 | 5.<br>98<br>75<br>7 | 4.<br>17<br>36<br>7 | -4.<br>196<br>558<br>426 | -2.<br>069<br>206<br>667     | 4.1<br>96<br>55<br>84<br>26 | D<br>o<br>w<br>n | 0.0<br>19<br>32<br>74<br>09 | 0.9<br>30<br>85<br>92<br>11 |
| 87            | ACT<br>N1  | Actinin, $\alpha$ 1                                                                                                 | 6.<br>94<br>63<br>5 | 7.<br>30<br>88<br>2 | 7.<br>89<br>57<br>4  | 6.<br>44<br>60<br>3 | 6.<br>76<br>41<br>6 | 6.<br>54<br>00<br>9 | -1.<br>741<br>354<br>581 | -0.<br>800<br>21<br>45<br>81 | 1.7<br>41<br>35<br>45<br>81 | D<br>o<br>w<br>n | 0.0<br>12<br>97<br>45<br>87 | 0.9<br>30<br>85<br>92<br>11 |
| 11            | KCT        | Potassium channel                                                                                                   | 7.                  | 7.                  | 8.                   | 6.                  | 6.                  | 7.                  | -1.                      | -0.                          | 1.7                         | D                | 0.0                         | 0.9                         |

|    |      |                      |    |    |    |    |    |    |     |     |     |   |     |     |
|----|------|----------------------|----|----|----|----|----|----|-----|-----|-----|---|-----|-----|
| 52 | D12  | tetramerization      | 12 | 91 | 03 | 31 | 90 | 43 | 747 | 804 | 47  | o | 46  | 30  |
| 07 |      | domain containing    | 24 | 99 | 41 | 74 | 42 | 99 | 081 | 946 | 08  | w | 36  | 85  |
|    |      | 12                   | 2  |    | 6  | 4  | 3  | 7  | 205 | 667 | 12  | n | 16  | 92  |
|    |      |                      |    |    |    |    |    |    |     |     | 05  |   | 73  | 11  |
| 96 | ARH  | Rho guanine          | 6. | 6. | 6. | 7. | 6. | 6. | 1.6 | 0.7 | 1.6 | U | 0.0 | 0.9 |
| 39 | GEF  | nucleotide           | 24 | 62 | 49 | 77 | 87 | 88 | 499 | 224 | 49  | p | 27  | 30  |
|    | 10   | exchange factor 10   | 66 | 01 | 98 | 79 | 03 | 55 | 702 | 4   | 97  |   | 42  | 85  |
|    |      |                      | 2  |    | 1  | 8  | 1  | 6  | 36  |     | 02  |   | 78  | 92  |
|    |      |                      |    |    |    |    |    |    |     |     | 36  |   |     | 11  |
| 10 | LOC  | NP1P-like protein 1  | 5. | 5. | 6. | 4. | 4. | 5. | -1. | -0. | 1.8 | D | 0.0 | 0.9 |
| 27 | 1027 |                      | 15 | 57 | 33 | 89 | 32 | 20 | 841 | 881 | 41  | o | 31  | 30  |
| 24 | 2499 |                      | 31 | 97 | 36 | 51 | 09 | 72 | 706 | 043 | 70  | w | 97  | 85  |
| 99 | 3    |                      |    | 5  |    | 7  |    | 5  | 712 | 333 | 67  | n | 36  | 92  |
| 3  |      |                      |    |    |    |    |    |    |     |     | 12  |   | 18  | 11  |
| 22 | SHA  | SH3 and multiple     | 6. | 5. | 5. | 6. | 6. | 6. | 1.5 | 0.5 | 1.5 | U | 0.0 | 0.9 |
| 94 | NK2  | ankyrin repeat       | 07 | 55 | 98 | 61 | 58 | 18 | 110 | 955 | 11  | p | 19  | 30  |
| 1  |      | domains 2            | 46 | 29 | 11 | 69 | 95 | 88 | 031 | 066 | 00  |   | 20  | 85  |
|    |      |                      | 7  | 5  | 5  | 6  |    | 3  | 48  | 67  | 31  |   | 44  | 92  |
|    |      |                      |    |    |    |    |    |    |     |     | 48  |   | 18  | 11  |
| 60 | SCO  | Short coiled-coil    | 4. | 5. | 6. | 4. | 3. | 4. | -1. | -0. | 1.7 | D | 0.0 | 0.9 |
| 59 | C    | protein              | 96 | 30 | 02 | 94 | 88 | 92 | 799 | 847 | 99  | o | 47  | 30  |
| 2  |      |                      | 60 | 81 | 53 | 61 | 68 | 31 | 795 | 833 | 79  | w | 82  | 85  |
|    |      |                      | 7  | 8  | 3  | 2  | 4  | 2  | 927 | 333 | 59  | n | 49  | 92  |
|    |      |                      |    |    |    |    |    |    |     |     | 27  |   | 15  | 11  |
| 84 | TCH  | Trichoplein, keratin | 5. | 6. | 5. | 6. | 6. | 6. | 1.7 | 0.8 | 1.7 | U | 0.0 | 0.9 |
| 26 | P    | filament binding     | 57 | 08 | 21 | 38 | 92 | 07 | 864 | 370 | 86  | p | 20  | 30  |
| 0  |      |                      | 62 | 77 | 46 | 93 | 20 | 84 | 142 | 666 | 41  |   | 45  | 85  |
|    |      |                      | 6  |    | 8  | 9  | 1  | 4  | 53  | 67  | 42  |   | 72  | 92  |
|    |      |                      |    |    |    |    |    |    |     |     | 53  |   | 32  | 11  |

|               |            |                                                                                    |                     |                     |                     |                     |                     |                     |                          |                          |                             |                  |                             |                             |
|---------------|------------|------------------------------------------------------------------------------------|---------------------|---------------------|---------------------|---------------------|---------------------|---------------------|--------------------------|--------------------------|-----------------------------|------------------|-----------------------------|-----------------------------|
| 87<br>26      | EED        | Embryonic<br>ectoderm<br>development                                               | 5.<br>06<br>62<br>6 | 5.<br>22<br>25<br>7 | 6.<br>00<br>32<br>7 | 5.<br>09<br>55<br>9 | 4.<br>28<br>00<br>5 | 4.<br>82<br>69<br>1 | -1.<br>620<br>587<br>218 | -0.<br>696<br>516<br>667 | 1.6<br>20<br>58<br>72<br>18 | D<br>o<br>w<br>n | 0.0<br>49<br>28<br>57<br>71 | 0.9<br>30<br>85<br>92<br>11 |
| 25<br>38      | G6P<br>C   | Glucose-6-phospha<br>tase, catalytic<br>subunit                                    | 7.<br>35<br>58<br>6 | 7.<br>23<br>07<br>3 | 6.<br>07<br>43<br>1 | 5.<br>44<br>40<br>7 | 6.<br>13<br>12<br>8 | 5.<br>60<br>02<br>6 | -2.<br>237<br>307<br>153 | -1.<br>161<br>763<br>333 | 2.2<br>37<br>30<br>71<br>53 | D<br>o<br>w<br>n | 0.0<br>12<br>35<br>93<br>24 | 0.9<br>30<br>85<br>92<br>11 |
| 71<br>48      | TNX<br>B   | Tenascin XB                                                                        | 6.<br>00<br>12<br>4 | 7.<br>84<br>30<br>2 | 6.<br>71<br>67<br>3 | 7.<br>33<br>29<br>3 | 8.<br>09<br>13<br>4 | 8.<br>46<br>33<br>6 | 2.1<br>567<br>814<br>6   | 1.1<br>088<br>8<br>6     | 2.1<br>56<br>78<br>14<br>6  | U<br>p           | 0.0<br>49<br>27<br>88<br>26 | 0.9<br>30<br>85<br>92<br>11 |
| 57<br>12<br>4 | CD2<br>48  | CD248 molecule,<br>endosialin                                                      | 7.<br>00<br>10<br>2 | 7.<br>73<br>35<br>7 | 7.<br>80<br>94<br>7 | 7.<br>68<br>36<br>4 | 8.<br>55<br>77<br>6 | 8.<br>50<br>39<br>9 | 1.6<br>629<br>867<br>42  | 0.7<br>337<br>766<br>67  | 1.6<br>62<br>98<br>67<br>42 | U<br>p           | 0.0<br>43<br>89<br>55<br>46 | 0.9<br>30<br>85<br>92<br>11 |
| 22<br>87<br>3 | DZIP<br>1  | DAZ interacting<br>zinc finger protein<br>1                                        | 4.<br>58<br>28      | 5.<br>33<br>20<br>4 | 5.<br>75<br>94<br>8 | 3.<br>70<br>23<br>7 | 4.<br>87<br>18<br>2 | 4.<br>17<br>95<br>3 | -1.<br>963<br>643<br>91  | -0.<br>973<br>533<br>333 | 1.9<br>63<br>64<br>39<br>1  | D<br>o<br>w<br>n | 0.0<br>30<br>95<br>64<br>63 | 0.9<br>30<br>85<br>92<br>11 |
| 47<br>7       | ATP1<br>A2 | Atpase, Na <sup>+</sup> /K <sup>+</sup><br>transporting, $\alpha$ 2<br>polypeptide | 6.<br>10<br>17      | 7.<br>00<br>16<br>8 | 7.<br>00<br>8<br>7  | 4.<br>58<br>71<br>7 | 6.<br>28<br>57<br>9 | 5.<br>29<br>87<br>7 | -2.<br>484<br>949<br>73  | -1.<br>313<br>216<br>667 | 2.4<br>84<br>94<br>97       | D<br>o<br>w<br>n | 0.0<br>18<br>11<br>94       | 0.9<br>30<br>85<br>92       |

|    |     |                      |    |    |    |    |    |    |     |     |     |   |     |     |
|----|-----|----------------------|----|----|----|----|----|----|-----|-----|-----|---|-----|-----|
|    |     |                      |    |    |    |    |    |    |     |     | 3   |   | 41  | 11  |
| 51 | PDE | Phosphodiesterase    | 4. | 4. | 5. | 3. | 4. | 4. | -1. | -0. | 1.8 | D | 0.0 | 0.9 |
| 44 | 4D  | 4D                   | 37 | 64 | 22 | 21 | 22 | 13 | 848 | 886 | 48  | o | 23  | 30  |
|    |     |                      | 89 | 66 | 04 | 97 | 99 | 62 | 989 | 736 | 98  | w | 34  | 85  |
|    |     |                      | 8  | 7  | 6  |    | 5  | 5  | 032 | 667 | 90  | n | 57  | 92  |
|    |     |                      |    |    |    |    |    |    |     |     | 32  |   | 17  | 11  |
| 40 | DUO | Dual oxidase         | 9. | 10 | 9. | 7. | 9. | 9. | -2. | -1. | 2.3 | D | 0.0 | 0.9 |
| 57 | XA2 | maturation factor 2  | 55 | .1 | 87 | 41 | 46 | 05 | 302 | 203 | 02  | o | 38  | 30  |
| 53 |     |                      | 96 | 07 | 30 | 39 | 13 | 49 | 934 | 473 | 93  | w | 63  | 85  |
|    |     |                      | 3  | 92 | 8  | 1  | 3  | 7  | 428 | 333 | 44  | n | 14  | 92  |
|    |     |                      |    |    |    |    |    |    |     |     | 28  |   | 3   | 11  |
| 57 | PSP | Phosphoserine        | 7. | 8. | 8. | 7. | 7. | 4. | -3. | -1. | 3.8 | D | 0.0 | 0.9 |
| 23 | H   | phosphatase          | 83 | 49 | 72 | 75 | 13 | 30 | 863 | 950 | 63  | o | 42  | 30  |
|    |     |                      | 03 | 35 | 14 | 28 | 33 | 90 | 825 | 03  | 82  | w | 68  | 85  |
|    |     |                      | 4  | 3  | 7  |    | 9  | 6  | 661 |     | 56  | n | 71  | 92  |
|    |     |                      |    |    |    |    |    |    |     |     | 61  |   | 82  | 11  |
| 95 | ENT | Ectonucleoside       | 5. | 5. | 6. | 4. | 5. | 4. | -1. | -0. | 1.9 | D | 0.0 | 0.9 |
| 3  | PD1 | triphosphate         | 41 | 74 | 16 | 03 | 66 | 81 | 913 | 936 | 13  | o | 46  | 30  |
|    |     | diphosphohydrolase 1 | 05 | 52 | 40 | 70 | 29 | 04 | 866 | 49  | 86  | w | 75  | 85  |
|    |     |                      | 7  | 6  | 7  | 5  | 8  |    | 235 |     | 62  | n | 88  | 92  |
|    |     |                      |    |    |    |    |    |    |     |     | 35  |   | 7   | 11  |
| 51 | KLH | Kelch like family    | 4. | 4. | 5. | 3. | 4. | 4. | -1. | -0. | 1.5 | D | 0.0 | 0.9 |
| 08 | L5  | member 5             | 25 | 71 | 00 | 74 | 02 | 29 | 554 | 636 | 54  | o | 22  | 30  |
| 8  |     |                      | 07 | 55 | 99 | 79 | 62 | 30 | 330 | 293 | 33  | w | 92  | 85  |
|    |     |                      | 3  |    | 8  | 9  | 6  | 8  | 537 | 333 | 05  | n | 45  | 92  |
|    |     |                      |    |    |    |    |    |    |     |     | 37  |   | 57  | 11  |
| 33 | PKD | Polycystic kidney    | 5. | 5. | 6. | 4. | 4. | 5. | -1. | -0. | 1.8 | D | 0.0 | 0.9 |
| 90 | 1P1 | disease 1            | 15 | 57 | 33 | 89 | 32 | 20 | 841 | 881 | 41  | o | 31  | 30  |
| 44 |     | (autosomal           | 31 | 97 | 36 | 51 | 09 | 72 | 706 | 043 | 70  | w | 97  | 85  |

|    |      |                                   |    |    |    |    |    |    |     |     |     |   |     |     |
|----|------|-----------------------------------|----|----|----|----|----|----|-----|-----|-----|---|-----|-----|
|    |      | dominant)<br>pseudogene 1         |    | 5  |    | 7  |    | 5  | 712 | 333 | 67  | n | 36  | 92  |
|    |      |                                   |    |    |    |    |    |    |     |     | 12  |   | 18  | 11  |
| 78 | PTP4 | Protein tyrosine                  | 6. | 7. | 7. | 7. | 5. | 6. | -2. | -1. | 2.0 | D | 0.0 | 0.9 |
| 03 | A1   | phosphatase type<br>IVA, member 1 | 71 | 72 | 84 | 00 | 73 | 38 | 077 | 054 | 77  | o | 29  | 30  |
|    |      |                                   | 70 | 55 | 37 | 75 | 12 | 39 | 022 | 516 | 02  | w | 34  | 85  |
|    |      |                                   | 6  | 5  | 4  | 8  | 7  | 5  | 244 | 667 | 22  | n | 64  | 92  |
|    |      |                                   |    |    |    |    |    |    |     |     | 44  |   | 66  | 11  |
| 12 | CCR  | Chemokine (C-C                    | 5. | 4. | 4. | 5. | 5. | 5. | 1.5 | 0.6 | 1.5 | U | 0.0 | 0.9 |
| 35 | 6    | motif) receptor 6                 | 01 | 62 | 77 | 03 | 39 | 85 | 428 | 255 | 42  | p | 25  | 30  |
|    |      |                                   | 42 | 70 | 04 | 46 | 57 | 80 | 452 | 933 | 84  |   | 68  | 85  |
|    |      |                                   | 3  | 6  | 3  | 9  | 5  | 6  | 17  | 33  | 52  |   | 65  | 92  |
|    |      |                                   |    |    |    |    |    |    |     |     | 17  |   | 3   | 11  |
| 10 | NBR  | Neighbor of                       | 6. | 6. | 5. | 6. | 6. | 7. | 1.6 | 0.6 | 1.6 | U | 0.0 | 0.9 |
| 23 | 2    | BRCA1 gene 2                      | 49 | 11 | 84 | 45 | 86 | 17 | 041 | 817 | 04  | p | 23  | 30  |
| 0  |      | (non-protein<br>coding)           | 26 | 40 | 73 | 72 | 53 | 67 | 065 | 7   | 10  |   | 40  | 85  |
|    |      |                                   |    | 4  | 5  |    | 7  | 3  | 79  |     | 65  |   | 44  | 92  |
|    |      |                                   |    |    |    |    |    |    |     |     | 79  |   | 17  | 11  |
| 74 | VTN  | Vitronectin                       | 13 | 12 | 12 | 11 | 12 | 12 | -1. | -0. | 1.5 | D | 0.0 | 0.9 |
| 48 |      |                                   | .0 | .9 | .8 | .9 | .3 | .6 | 548 | 631 | 48  | o | 11  | 30  |
|    |      |                                   | 50 | 78 | 38 | 10 | 76 | 86 | 802 | 153 | 80  | w | 85  | 85  |
|    |      |                                   | 95 | 01 | 56 | 43 | 9  | 73 | 658 | 333 | 26  | n | 25  | 92  |
|    |      |                                   |    |    |    |    |    |    |     |     | 58  |   | 04  | 11  |
| 10 | PDC  | Programmed cell                   | 5. | 5. | 5. | 6. | 5. | 6. | 1.5 | 0.6 | 1.5 | U | 0.0 | 0.9 |
| 01 | D6   | death 6                           | 89 | 77 | 26 | 30 | 89 | 68 | 723 | 529 | 72  | p | 33  | 30  |
| 6  |      |                                   | 71 | 28 | 47 | 84 | 91 | 59 | 510 | 233 | 35  |   | 40  | 85  |
|    |      |                                   | 9  | 8  | 6  | 9  | 8  | 3  | 25  | 33  | 10  |   | 53  | 92  |
|    |      |                                   |    |    |    |    |    |    |     |     | 25  |   | 89  | 11  |
| 90 | DIR  | DIRAS family,                     | 5. | 6. | 6. | 4. | 5. | 4. | -2. | -1. | 2.6 | D | 0.0 | 0.9 |
| 77 | AS3  | GTP-binding                       | 17 | 33 | 74 | 02 | 72 | 24 | 677 | 420 | 77  | o | 29  | 30  |

|               |                   |                                                             |                     |                     |                     |                     |                     |                     |                          |                             |                             |                  |                             |                             |
|---------------|-------------------|-------------------------------------------------------------|---------------------|---------------------|---------------------|---------------------|---------------------|---------------------|--------------------------|-----------------------------|-----------------------------|------------------|-----------------------------|-----------------------------|
|               |                   | RAS-like 3                                                  | 26<br>7             | 41<br>7             | 56<br>1             | 89<br>2             | 07<br>1             | 00<br>7             | 555<br>848               | 916<br>667                  | 55<br>58<br>48              | w<br>n           | 14<br>30<br>13              | 85<br>92<br>11              |
| 28<br>89<br>6 | IGK<br>V1D-<br>33 | Immunoglobulin $\kappa$<br>variable 1D-33                   | 4.<br>84<br>29<br>2 | 5.<br>68<br>69<br>1 | 5.<br>56<br>01<br>6 | 4.<br>43<br>06<br>2 | 4.<br>01<br>58<br>8 | 4.<br>39<br>53<br>2 | -2.1<br>180<br>304<br>54 | -1.<br>082<br>723<br>333    | 2.1<br>18<br>03<br>04<br>54 | D<br>o<br>w<br>n | 0.0<br>02<br>39<br>96<br>6  | 0.9<br>30<br>85<br>92<br>11 |
| 50<br>96      | PCC<br>B          | Propionyl-coa<br>carboxylase $\beta$<br>subunit             | 7.<br>87<br>44<br>5 | 7.<br>31<br>66<br>6 | 7.<br>93<br>18<br>1 | 6.<br>97<br>76<br>6 | 6.<br>85<br>40<br>1 | 7.<br>37<br>95<br>1 | -1.<br>555<br>357<br>978 | -0.<br>637<br>246<br>667    | 1.5<br>55<br>35<br>79<br>78 | D<br>o<br>w<br>n | 0.0<br>22<br>31<br>33<br>68 | 0.9<br>30<br>85<br>92<br>11 |
| 50<br>61<br>8 | ITSN<br>2         | Intersectin 2                                               | 8.<br>24<br>08<br>6 | 7.<br>94<br>47<br>5 | 7.<br>28<br>24<br>5 | 8.<br>87<br>98<br>5 | 8.<br>96<br>69<br>9 | 8.<br>02<br>18<br>9 | 1.7<br>413<br>344<br>64  | 0.8<br>001<br>933<br>33     | 1.7<br>41<br>33<br>44<br>64 | U<br>p           | 0.0<br>40<br>26<br>57<br>59 | 0.9<br>30<br>85<br>92<br>11 |
| 52<br>12      | VIT               | Vitrin                                                      | 3.<br>36<br>08<br>2 | 3.<br>96<br>37<br>7 | 3.<br>30<br>01<br>7 | 3.<br>77<br>25<br>7 | 5.<br>08<br>41<br>7 | 5.<br>75<br>78<br>3 | 2.5<br>139<br>570<br>46  | 1.3<br>299<br>6<br>70<br>46 | 2.5<br>13<br>95<br>70<br>46 | U<br>p           | 0.0<br>21<br>55<br>60<br>95 | 0.9<br>30<br>85<br>92<br>11 |
| 40<br>82      | MAR<br>CKS        | Myristoylated<br>alanine-rich protein<br>kinase C substrate | 7.<br>07<br>27<br>7 | 7.<br>70<br>80<br>3 | 7.<br>46<br>62<br>4 | 6.<br>43<br>59<br>4 | 6.<br>87<br>56<br>2 | 7.<br>02<br>80<br>2 | -1.<br>553<br>813<br>481 | -0.<br>635<br>813<br>333    | 1.5<br>53<br>81<br>34<br>81 | D<br>o<br>w<br>n | 0.0<br>23<br>93<br>00<br>34 | 0.9<br>30<br>85<br>92<br>11 |
| 64            | AID               | Axin interactor,                                            | 5.                  | 5.                  | 6.                  | 5.                  | 4.                  | 5.                  | -1.                      | -0.                         | 1.7                         | D                | 0.0                         | 0.9                         |



|    |      |                    |    |    |    |    |    |    |     |     |     |   |     |     |
|----|------|--------------------|----|----|----|----|----|----|-----|-----|-----|---|-----|-----|
| 85 | A    | dorsalization      | 68 | 98 | 24 | 36 | 76 | 28 | 784 | 835 | 84  | o | 05  | 30  |
| 3  |      | associated         | 93 | 98 | 04 | 55 | 46 | 40 | 001 | 116 | 00  | w | 63  | 85  |
|    |      |                    | 3  | 1  | 8  | 8  | 1  | 8  | 3   | 667 | 13  | n | 02  | 92  |
|    |      |                    |    |    |    |    |    |    |     |     |     |   | 2   | 11  |
| 33 | HSP  | Heat shock protein | 10 | 11 | 11 | 10 | 9. | 10 | -2. | -1. | 2.5 | D | 0.0 | 0.9 |
| 12 | A8   | family A (Hsp70)   | .6 | .5 | .8 | .1 | 22 | .5 | 546 | 348 | 46  | o | 111 | 30  |
|    |      | member 8           | 07 | 58 | 08 | 33 | 47 | 72 | 225 | 36  | 22  | w | 88  | 85  |
|    |      |                    | 97 | 62 | 96 | 2  | 8  | 49 | 158 |     | 51  | n | 50  | 92  |
|    |      |                    |    |    |    |    |    |    |     |     | 58  |   | 8   | 11  |
| 36 | IRS1 | Insulin receptor   | 6. | 6. | 6. | 5. | 5. | 6. | -1. | -0. | 1.5 | D | 0.0 | 0.9 |
| 67 |      | substrate 1        | 28 | 45 | 80 | 71 | 77 | 22 | 525 | 609 | 25  | o | 19  | 30  |
|    |      |                    | 43 | 37 | 52 | 39 | 24 | 87 | 635 | 41  | 63  | w | 98  | 85  |
|    |      |                    | 3  | 7  | 4  |    | 6  | 5  | 162 |     | 51  | n | 50  | 92  |
|    |      |                    |    |    |    |    |    |    |     |     | 62  |   | 73  | 11  |
| 33 | ID3  | Inhibitor of DNA   | 6. | 7. | 7. | 5. | 5. | 5. | -3. | -1. | 3.5 | D | 0.0 | 0.9 |
| 99 |      | binding 3,         | 78 | 75 | 12 | 57 | 48 | 15 | 523 | 817 | 23  | o | 00  | 30  |
|    |      | dominant negative  | 35 | 66 | 48 | 23 | 58 | 54 | 884 | 166 | 88  | w | 14  | 85  |
|    |      | helix-loop-helix   | 9  | 7  | 9  | 1  | 5  | 9  | 568 | 667 | 45  | n | 78  | 92  |
|    |      | protein            |    |    |    |    |    |    |     |     | 68  |   | 84  | 11  |
| 23 | KCN  | Potassium channel, | 5. | 6. | 6. | 3. | 5. | 4. | -3. | -1. | 3.0 | D | 0.0 | 0.9 |
| 70 | E4   | voltage gated      | 11 | 75 | 71 | 95 | 70 | 11 | 036 | 602 | 36  | o | 25  | 30  |
| 4  |      | subfamily E        | 09 | 56 | 10 | 00 | 85 | 18 | 494 | 406 | 49  | w | 49  | 85  |
|    |      | regulatory $\beta$ | 4  | 1  | 6  | 5  | 1  | 3  | 312 | 667 | 43  | n | 83  | 92  |
|    |      | subunit 4          |    |    |    |    |    |    |     |     | 12  |   | 83  | 11  |
| 10 | NDR  | N-myc downstream   | 5. | 6. | 6. | 5. | 4. | 5. | -1. | -0. | 1.9 | D | 0.0 | 0.9 |
| 39 | G1   | regulated 1        | 79 | 31 | 25 | 87 | 47 | 14 | 941 | 956 | 41  | o | 24  | 30  |
| 7  |      |                    | 25 | 04 | 77 | 33 | 30 | 34 | 183 | 936 | 18  | w | 14  | 85  |
|    |      |                    |    | 1  | 7  | 3  | 9  | 5  | 721 | 667 | 37  | n | 64  | 92  |
|    |      |                    |    |    |    |    |    |    |     |     | 21  |   | 74  | 11  |

|    |      |                           |    |    |    |    |    |    |     |     |     |   |     |     |
|----|------|---------------------------|----|----|----|----|----|----|-----|-----|-----|---|-----|-----|
| 59 | PLE  | Pleckstrin                | 7. | 6. | 6. | 7. | 7. | 7. | 1.5 | 0.6 | 1.5 | U | 0.0 | 0.9 |
| 33 | KHA  | homology domain           | 13 | 74 | 56 | 41 | 60 | 32 | 487 | 311 | 48  | p | 10  | 30  |
| 8  | 1    | containing A1             | 93 | 95 | 14 | 61 | 66 | 09 | 847 | 366 | 78  |   | 80  | 85  |
|    |      |                           | 3  | 8  | 1  | 8  | 2  | 3  | 65  | 67  | 47  |   | 32  | 92  |
|    |      |                           |    |    |    |    |    |    |     |     | 65  |   | 2   | 11  |
| 72 | C4BP | Complement                | 3. | 3. | 3. | 3. | 4. | 4. | 1.7 | 0.7 | 1.7 | U | 0.0 | 0.9 |
| 2  | A    | component 4               | 62 | 66 | 38 | 75 | 88 | 35 | 078 | 721 | 07  | p | 20  | 30  |
|    |      | binding protein, $\alpha$ | 93 | 70 | 13 | 21 | 98 | 23 | 484 | 8   | 84  |   | 93  | 85  |
|    |      |                           | 5  | 9  | 4  |    | 3  | 9  | 98  |     | 84  |   | 51  | 92  |
|    |      |                           |    |    |    |    |    |    |     |     | 98  |   | 23  | 11  |
| 79 | ARH  | Rho gtpase                | 5. | 5. | 6. | 4. | 5. | 4. | -1. | -0. | 1.8 | D | 0.0 | 0.9 |
| 82 | GAP  | activating protein        | 33 | 61 | 19 | 20 | 43 | 80 | 860 | 896 | 60  | o | 31  | 30  |
| 2  | 28   | 28                        | 20 | 67 | 34 | 77 | 97 | 66 | 959 | 046 | 95  | w | 10  | 85  |
|    |      |                           | 9  | 8  |    | 5  |    | 8  | 511 | 667 | 95  | n | 12  | 92  |
|    |      |                           |    |    |    |    |    |    |     |     | 11  |   | 53  | 11  |
| 48 | NNA  | Neuronatin                | 7. | 8. | 8. | 6. | 7. | 6. | -1. | -0. | 1.8 | D | 0.0 | 0.9 |
| 26 | T    |                           | 44 | 41 | 20 | 71 | 60 | 98 | 891 | 919 | 91  | o | 19  | 30  |
|    |      |                           | 58 | 44 | 52 | 77 | 02 | 97 | 105 | 23  | 10  | w | 56  | 85  |
|    |      |                           | 2  | 5  | 3  | 6  | 8  | 7  | 697 |     | 56  | n | 02  | 92  |
|    |      |                           |    |    |    |    |    |    |     |     | 97  |   | 8   | 11  |
| 23 | MRP  | Mitochondrial             | 4. | 5. | 5. | 4. | 4. | 4. | -1. | -0. | 1.5 | D | 0.0 | 0.9 |
| 10 | S27  | ribosomal protein         | 89 | 32 | 69 | 88 | 37 | 87 | 508 | 592 | 08  | o | 39  | 30  |
| 7  |      | S27                       | 63 | 51 | 21 | 64 | 22 | 66 | 101 | 733 | 10  | w | 63  | 85  |
|    |      |                           | 6  | 1  | 1  | 8  | 3  | 7  | 295 | 333 | 12  | n | 07  | 92  |
|    |      |                           |    |    |    |    |    |    |     |     | 95  |   | 75  | 11  |
| 11 | FKB  | FK506 binding             | 3. | 3. | 4. | 3. | 3. | 3. | -1. | -0. | 1.5 | D | 0.0 | 0.9 |
| 32 | P9   | protein 9                 | 93 | 73 | 07 | 29 | 05 | 61 | 506 | 591 | 06  | o | 08  | 30  |
| 8  |      |                           | 28 | 56 | 20 | 01 | 72 | 94 | 548 | 246 | 54  | w | 06  | 85  |
|    |      |                           | 7  | 5  | 8  | 7  | 7  | 2  | 029 | 667 | 80  | n | 75  | 92  |

|    |      |                          |    |    |    |    |    |    |     |     |     |    |     |     |    |
|----|------|--------------------------|----|----|----|----|----|----|-----|-----|-----|----|-----|-----|----|
|    |      |                          |    |    |    |    |    |    |     |     |     | 29 |     | 11  | 11 |
| 22 | POM  | POM121 and ZP3           | 6. | 6. | 6. | 6. | 7. | 7. | 1.5 | 0.6 | 1.5 | U  | 0.0 | 0.9 |    |
| 93 | ZP3  | fusion                   | 93 | 35 | 04 | 85 | 32 | 06 | 534 | 354 | 53  | p  | 35  | 30  |    |
| 2  |      |                          | 23 | 22 | 64 | 11 | 10 | 53 | 473 | 733 | 44  |    | 44  | 85  |    |
|    |      |                          | 9  | 1  | 9  | 3  | 3  | 5  | 36  | 33  | 73  |    | 52  | 92  |    |
|    |      |                          |    |    |    |    |    |    |     |     | 36  |    | 56  | 11  |    |
| 48 | ATP2 | Atpase, Ca <sup>++</sup> | 5. | 5. | 5. | 5. | 4. | 5. | -1. | -0. | 1.5 | D  | 0.0 | 0.9 |    |
| 8  | A2   | transporting,            | 53 | 36 | 73 | 12 | 58 | 14 | 504 | 589 | 04  | o  | 17  | 30  |    |
|    |      | cardiac muscle,          | 20 | 49 | 17 | 31 | 96 | 77 | 655 | 433 | 65  | w  | 89  | 85  |    |
|    |      | slow twitch 2            | 9  | 4  | 8  | 4  | 4  | 3  | 628 | 333 | 56  | n  | 86  | 92  |    |
|    |      |                          |    |    |    |    |    |    |     |     | 28  |    | 93  | 11  |    |
| 52 | PHF  | PHD finger protein       | 6. | 6. | 5. | 6. | 7. | 6. | 1.5 | 0.6 | 1.5 | U  | 0.0 | 0.9 |    |
| 53 | 2    | 2                        | 49 | 09 | 55 | 64 | 14 | 36 | 919 | 707 | 91  | p  | 49  | 30  |    |
|    |      |                          | 05 | 48 | 57 | 57 | 31 | 45 | 223 | 7   | 92  |    | 57  | 85  |    |
|    |      |                          | 1  | 2  | 7  | 1  | 1  | 9  | 87  |     | 23  |    | 98  | 92  |    |
|    |      |                          |    |    |    |    |    |    |     |     | 87  |    | 31  | 11  |    |
| 19 | EEF2 | Eukaryotic               | 8. | 9. | 8. | 8. | 8. | 8. | -1. | -0. | 1.5 | D  | 0.0 | 0.9 |    |
| 38 |      | translation              | 80 | 20 | 59 | 22 | 08 | 48 | 518 | 602 | 18  | o  | 16  | 30  |    |
|    |      | elongation factor 2      | 61 | 56 | 7  | 86 | 94 | 33 | 320 | 476 | 32  | w  | 15  | 85  |    |
|    |      |                          | 8  | 9  |    | 5  | 6  | 3  | 824 | 667 | 08  | n  | 74  | 92  |    |
|    |      |                          |    |    |    |    |    |    |     |     | 24  |    | 97  | 11  |    |
| 34 | IGFB | Insulin like growth      | 5. | 7. | 6. | 7. | 7. | 9. | 3.3 | 1.7 | 3.3 | U  | 0.0 | 0.9 |    |
| 89 | P6   | factor binding           | 14 | 88 | 30 | 66 | 76 | 16 | 672 | 515 | 67  | p  | 35  | 30  |    |
|    |      | protein 6                | 87 | 31 | 73 | 34 | 95 | 09 | 636 | 766 | 26  |    | 07  | 85  |    |
|    |      |                          | 2  | 6  |    |    | 7  | 4  | 06  | 67  | 36  |    | 41  | 92  |    |
|    |      |                          |    |    |    |    |    |    |     |     | 06  |    | 66  | 11  |    |
| 95 | ADA  | ADAM                     | 4. | 6. | 5. | 4. | 4. | 4. | -1. | -0. | 1.7 | D  | 0.0 | 0.9 |    |
| 10 | MTS  | metallopeptidase         | 82 | 00 | 71 | 66 | 97 | 53 | 727 | 789 | 27  | o  | 31  | 30  |    |
|    | 1    | with                     | 75 | 65 | 03 | 79 | 42 | 49 | 996 | 1   | 99  | w  | 08  | 85  |    |

|    |      |                                  |    |    |    |    |    |    |     |     |     |   |     |     |
|----|------|----------------------------------|----|----|----|----|----|----|-----|-----|-----|---|-----|-----|
|    |      | thrombospondin<br>type 1 motif 1 | 6  | 5  | 7  | 7  | 8  | 3  | 146 |     | 61  | n | 26  | 92  |
|    |      |                                  |    |    |    |    |    |    |     |     | 46  |   | 13  | 11  |
| 30 | CD2  | CD209 molecule                   | 4. | 5. | 4. | 4. | 7. | 6. | 2.6 | 1.3 | 2.6 | U | 0.0 | 0.9 |
| 83 | 09   |                                  | 59 | 35 | 78 | 82 | 34 | 71 | 028 | 800 | 02  | p | 48  | 30  |
| 5  |      |                                  | 57 | 62 | 54 | 28 | 20 | 28 | 340 | 833 | 83  |   | 16  | 85  |
|    |      |                                  | 7  |    | 8  | 1  | 5  | 4  | 52  | 33  | 40  |   | 35  | 92  |
|    |      |                                  |    |    |    |    |    |    |     |     | 52  |   | 32  | 11  |
| 57 | PTP  | Protein tyrosine                 | 5. | 5. | 4. | 6. | 6. | 5. | 1.7 | 0.7 | 1.7 | U | 0.0 | 0.9 |
| 91 | RE   | phosphatase,<br>receptor type, E | 58 | 40 | 90 | 04 | 29 | 91 | 250 | 865 | 25  | p | 06  | 30  |
|    |      |                                  | 44 | 49 | 07 | 61 | 14 | 23 | 003 | 966 | 00  |   | 43  | 85  |
|    |      |                                  | 1  | 8  | 7  | 9  | 5  | 1  | 64  | 67  | 03  |   | 23  | 92  |
|    |      |                                  |    |    |    |    |    |    |     |     | 64  |   | 42  | 11  |
| 34 | TUB  | Tubulin, $\beta$ 2B class        | 7. | 7. | 8. | 6. | 7. | 6. | -2. | -1. | 2.1 | D | 0.0 | 0.9 |
| 77 | B2B  | iib                              | 43 | 63 | 36 | 28 | 48 | 36 | 140 | 097 | 40  | o | 18  | 30  |
| 33 |      |                                  | 71 | 00 | 60 | 72 | 28 | 95 | 433 | 903 | 43  | w | 87  | 85  |
|    |      |                                  | 8  | 7  | 6  |    | 7  | 3  | 974 | 333 | 39  | n | 29  | 92  |
|    |      |                                  |    |    |    |    |    |    |     |     | 74  |   | 42  | 11  |
| 10 | BOR  | BORCS7-ASMT                      | 7. | 7. | 7. | 7. | 7. | 8. | 1.5 | 0.6 | 1.5 | U | 0.0 | 0.9 |
| 05 | CS7- | readthrough (NMD                 | 59 | 62 | 60 | 88 | 94 | 79 | 172 | 014 | 17  | p | 42  | 30  |
| 28 | ASM  | candidate)                       | 26 | 67 | 36 | 34 | 92 | 47 | 792 | 866 | 27  |   | 18  | 85  |
| 00 | T    |                                  |    |    | 1  | 1  | 5  | 1  | 85  | 67  | 92  |   | 65  | 92  |
| 7  |      |                                  |    |    |    |    |    |    |     |     | 85  |   | 67  | 11  |
| 55 | CBW  | COBW domain                      | 4. | 3. | 4. | 3. | 3. | 3. | -1. | -0. | 1.6 | D | 0.0 | 0.9 |
| 87 | D1   | containing 1                     | 45 | 86 | 15 | 71 | 32 | 19 | 674 | 744 | 74  | o | 05  | 30  |
| 1  |      |                                  | 21 | 23 | 27 | 57 | 17 | 77 | 812 |     | 81  | w | 34  | 85  |
|    |      |                                  | 2  | 7  | 1  | 4  | 2  | 4  | 975 |     | 29  | n | 61  | 92  |
|    |      |                                  |    |    |    |    |    |    |     |     | 75  |   | 82  | 11  |
| 57 | PLX  | Plexin domain                    | 5. | 5. | 5. | 4. | 5. | 4. | -1. | -0. | 1.5 | D | 0.0 | 0.9 |
| 12 | DC1  | containing 1                     | 00 | 23 | 45 | 17 | 13 | 55 | 525 | 609 | 25  | o | 43  | 30  |

|                |             |                                           |                     |                     |                     |                     |                     |                     |                          |                          |                             |                  |                             |                             |
|----------------|-------------|-------------------------------------------|---------------------|---------------------|---------------------|---------------------|---------------------|---------------------|--------------------------|--------------------------|-----------------------------|------------------|-----------------------------|-----------------------------|
| 5              |             |                                           | 82<br>9             | 61<br>5             | 17<br>7             | 67<br>7             | 62<br>4             | 41<br>9             | 910<br>135               | 67                       | 91<br>01<br>35              | w<br>n           | 34<br>56<br>06              | 85<br>92<br>11              |
| 65<br>00       | SKP<br>1    | S-phase<br>kinase-associated<br>protein 1 | 9.<br>73<br>73<br>7 | 9.<br>68<br>45<br>1 | 9.<br>90<br>28<br>9 | 9.<br>09<br>12      | 8.<br>73<br>65      | 9.<br>50<br>14      | -1.<br>585<br>813<br>743 | -0.<br>665<br>223<br>333 | 1.5<br>85<br>81<br>37<br>43 | D<br>o<br>w<br>n | 0.0<br>11<br>99<br>60<br>31 | 0.9<br>30<br>85<br>92<br>11 |
| 27<br>23<br>3  | SUL<br>T1C4 | Sulfotransferase<br>family 1C member<br>4 | 5.<br>70<br>97<br>1 | 5.<br>61<br>68<br>8 | 5.<br>79<br>95<br>9 | 4.<br>95<br>93<br>8 | 4.<br>72<br>82<br>2 | 5.<br>15<br>79<br>1 | -1.<br>693<br>752<br>802 | -0.<br>760<br>223<br>333 | 1.6<br>93<br>75<br>28<br>02 | D<br>o<br>w<br>n | 0.0<br>01<br>52<br>89<br>7  | 0.9<br>30<br>85<br>92<br>11 |
| 28<br>40<br>76 | TTL<br>L6   | Tubulin tyrosine<br>ligase like 6         | 6.<br>02<br>83<br>3 | 5.<br>89<br>98<br>5 | 6.<br>00<br>29<br>6 | 6.<br>45<br>83<br>6 | 6.<br>50<br>30<br>6 | 7.<br>08<br>29<br>4 | 1.6<br>294<br>517<br>88  | 0.7<br>043<br>866<br>67  | 1.6<br>29<br>45<br>17<br>88 | U<br>p           | 0.0<br>07<br>96<br>19<br>09 | 0.9<br>30<br>85<br>92<br>11 |
| 18<br>45       | DUS<br>P3   | Dual specificity<br>phosphatase 3         | 5.<br>96<br>76<br>1 | 5.<br>94<br>55<br>3 | 6.<br>28<br>41<br>3 | 5.<br>58<br>07<br>5 | 5.<br>32<br>26<br>5 | 5.<br>50<br>80<br>9 | -1.<br>510<br>744<br>825 | -0.<br>595<br>26         | 1.5<br>10<br>74<br>48<br>25 | D<br>o<br>w<br>n | 0.0<br>06<br>55<br>31<br>7  | 0.9<br>30<br>85<br>92<br>11 |
| 10<br>96<br>3  | STIP<br>1   | Stress induced<br>phosphoprotein 1        | 5.<br>65<br>05<br>1 | 5.<br>68<br>90<br>9 | 6.<br>20<br>93<br>4 | 5.<br>21<br>37<br>3 | 4.<br>26<br>91<br>6 | 5.<br>37<br>72<br>8 | -1.<br>861<br>230<br>413 | -0.<br>896<br>256<br>667 | 1.8<br>61<br>23<br>04<br>13 | D<br>o<br>w<br>n | 0.0<br>20<br>87<br>49<br>07 | 0.9<br>30<br>85<br>92<br>11 |
| 64             | SH3         | SH3 domain                                | 7.                  | 7.                  | 8.                  | 7.                  | 6.                  | 7.                  | -1.                      | -0.                      | 1.6                         | D                | 0.0                         | 0.9                         |

|    |      |                      |    |    |    |    |    |    |     |     |     |   |     |     |
|----|------|----------------------|----|----|----|----|----|----|-----|-----|-----|---|-----|-----|
| 51 | BGR  | binding              | 45 | 92 | 17 | 21 | 53 | 56 | 677 | 746 | 77  | o | 37  | 30  |
|    | L    | glutamate-rich       | 17 | 00 | 90 | 06 | 16 | 85 | 907 | 663 | 90  | w | 81  | 85  |
|    |      | protein like         | 4  | 1  | 4  | 1  | 1  | 8  | 673 | 333 | 76  | n | 95  | 92  |
|    |      |                      |    |    |    |    |    |    |     |     | 73  |   | 34  | 11  |
| 35 | CXC  | Chemokine (C-X-C     | 4. | 4. | 3. | 4. | 5. | 4. | 1.6 | 0.7 | 1.6 | U | 0.0 | 0.9 |
| 77 | R1   | motif) receptor 1    | 00 | 09 | 87 | 53 | 00 | 61 | 516 | 239 | 51  | p | 01  | 30  |
|    |      |                      | 60 | 43 | 71 | 75 | 10 | 08 | 751 | 3   | 67  |   | 94  | 85  |
|    |      |                      | 3  | 9  | 6  | 2  | 4  | 1  | 88  |     | 51  |   | 15  | 92  |
|    |      |                      |    |    |    |    |    |    |     |     | 88  |   | 88  | 11  |
| 84 | FND  | Fibronectin type III | 5. | 5. | 6. | 4. | 5. | 4. | -1. | -0. | 1.7 | D | 0.0 | 0.9 |
| 62 | C1   | domain containing    | 85 | 23 | 11 | 62 | 27 | 82 | 772 | 825 | 72  | o | 15  | 30  |
| 4  |      | 1                    | 26 | 70 | 94 | 44 | 84 | 83 | 681 | 933 | 68  | w | 50  | 85  |
|    |      |                      | 3  | 8  | 1  | 4  | 9  | 9  | 481 | 333 | 14  | n | 99  | 92  |
|    |      |                      |    |    |    |    |    |    |     |     | 81  |   | 22  | 11  |
| 87 | SNX  | Sorting nexin 3      | 7. | 8. | 8. | 7. | 7. | 7. | -1. | -0. | 1.7 | D | 0.0 | 0.9 |
| 24 | 3    |                      | 83 | 24 | 61 | 47 | 06 | 85 | 704 | 769 | 04  | o | 20  | 30  |
|    |      |                      | 89 | 87 | 74 | 53 | 16 | 88 | 994 | 766 | 99  | w | 72  | 85  |
|    |      |                      | 3  | 9  | 2  | 4  | 2  | 8  | 005 | 667 | 40  | n | 68  | 92  |
|    |      |                      |    |    |    |    |    |    |     |     | 05  |   | 66  | 11  |
| 96 | KIA  | KIAA0430             | 4. | 5. | 5. | 4. | 3. | 4. | -1. | -0. | 1.6 | D | 0.0 | 0.9 |
| 65 | A043 |                      | 61 | 04 | 19 | 33 | 88 | 36 | 692 | 758 | 92  | o | 06  | 30  |
|    | 0    |                      | 42 | 58 | 46 | 50 | 16 | 16 | 082 | 8   | 08  | w | 22  | 85  |
|    |      |                      | 5  | 5  | 4  | 5  | 2  | 7  | 604 |     | 26  | n | 98  | 92  |
|    |      |                      |    |    |    |    |    |    |     |     | 04  |   | 93  | 11  |
| 94 | HAN  | Heart and neural     | 5. | 5. | 5. | 4. | 5. | 4. | -1. | -0. | 1.5 | D | 0.0 | 0.9 |
| 21 | D1   | crest derivatives    | 15 | 47 | 46 | 51 | 02 | 72 | 529 | 613 | 29  | o | 09  | 30  |
|    |      | expressed 1          | 43 | 91 | 67 | 14 | 2  | 74 | 563 | 12  | 56  | w | 60  | 85  |
|    |      |                      | 8  | 9  | 2  | 6  |    | 7  | 498 |     | 34  | n | 29  | 92  |
|    |      |                      |    |    |    |    |    |    |     |     | 98  |   | 99  | 11  |

|    |     |                         |    |    |    |    |    |    |     |     |     |   |     |     |
|----|-----|-------------------------|----|----|----|----|----|----|-----|-----|-----|---|-----|-----|
| 92 | COP | Coatomer protein        | 5. | 6. | 6. | 5. | 5. | 5. | -1. | -0. | 1.6 | D | 0.0 | 0.9 |
| 76 | B2  | complex subunit $\beta$ | 87 | 14 | 36 | 47 | 12 | 56 | 670 | 740 | 70  | o | 05  | 30  |
|    |     | 2 ( $\beta$ prime)      | 78 | 41 | 23 | 50 | 32 | 45 | 797 | 536 | 79  | w | 07  | 85  |
|    |     |                         | 9  | 5  | 7  | 5  | 4  | 1  | 241 | 667 | 72  | n | 88  | 92  |
|    |     |                         |    |    |    |    |    |    |     |     | 41  |   | 36  | 11  |
| 71 | TNX | Tenascin XA             | 6. | 7. | 6. | 7. | 8. | 8. | 2.1 | 1.1 | 2.1 | U | 0.0 | 0.9 |
| 46 | A   | (pseudogene)            | 00 | 84 | 71 | 33 | 09 | 46 | 567 | 088 | 56  | p | 49  | 30  |
|    |     |                         | 12 | 30 | 67 | 29 | 13 | 33 | 814 | 8   | 78  |   | 27  | 85  |
|    |     |                         | 4  | 2  | 3  | 3  | 4  | 6  | 6   |     | 14  |   | 88  | 92  |
|    |     |                         |    |    |    |    |    |    |     |     | 6   |   | 26  | 11  |
| 84 | LTV | LTV1 ribosome           | 4. | 4. | 5. | 4. | 3. | 3. | -1. | -0. | 1.8 | D | 0.0 | 0.9 |
| 94 | 1   | biogenesis factor       | 07 | 55 | 03 | 08 | 04 | 87 | 846 | 884 | 46  | o | 26  | 30  |
| 6  |     |                         | 34 | 08 | 45 | 39 | 99 | 11 | 239 | 59  | 23  | w | 12  | 85  |
|    |     |                         | 5  |    | 5  | 4  | 8  | 1  | 863 |     | 98  | n | 36  | 92  |
|    |     |                         |    |    |    |    |    |    |     |     | 63  |   | 99  | 11  |
| 59 | RAP | RAP1A, member           | 6. | 6. | 7. | 5. | 5. | 6. | -1. | -0. | 1.6 | D | 0.0 | 0.9 |
| 06 | 1A  | of RAS oncogene         | 14 | 49 | 12 | 99 | 36 | 22 | 655 | 727 | 55  | o | 46  | 30  |
|    |     | family                  | 88 | 51 | 29 | 01 | 58 | 88 | 641 | 39  | 64  | w | 96  | 85  |
|    |     |                         | 9  | 5  | 8  | 1  | 9  | 5  | 137 |     | 11  | n | 00  | 92  |
|    |     |                         |    |    |    |    |    |    |     |     | 37  |   | 98  | 11  |
| 67 | STA | SH3 and cysteine        | 5. | 5. | 5. | 4. | 3. | 4. | -1. | -0. | 1.9 | D | 0.0 | 0.9 |
| 69 | C   | rich domain             | 27 | 34 | 39 | 61 | 67 | 92 | 913 | 936 | 13  | o | 14  | 30  |
|    |     |                         | 13 | 94 | 68 | 16 | 17 | 52 | 600 | 29  | 60  | w | 71  | 85  |
|    |     |                         |    |    | 2  | 8  |    | 7  | 936 |     | 09  | n | 13  | 92  |
|    |     |                         |    |    |    |    |    |    |     |     | 36  |   | 67  | 11  |
| 63 | SDH | Succinate               | 7. | 8. | 8. | 7. | 7. | 7. | -1. | -0. | 1.7 | D | 0.0 | 0.9 |
| 92 | D   | dehydrogenase           | 89 | 22 | 76 | 66 | 07 | 78 | 724 | 786 | 24  | o | 21  | 30  |
|    |     | complex subunit D,      | 26 | 39 | 44 | 36 | 53 | 27 | 805 | 433 | 80  | w | 66  | 85  |
|    |     | integral membrane       | 7  | 2  | 9  | 9  | 2  | 7  | 081 | 333 | 50  | n | 08  | 92  |

|    |     |                                    |    |    |    |    |    |    |     |     |     |   |     |     |
|----|-----|------------------------------------|----|----|----|----|----|----|-----|-----|-----|---|-----|-----|
|    |     | protein                            |    |    |    |    |    |    |     |     | 81  |   | 74  | 11  |
| 12 | CLT | Clathrin, heavy                    | 9. | 9. | 10 | 9. | 8. | 9. | -1. | -0. | 1.6 | D | 0.0 | 0.9 |
| 13 | C   | chain (Hc)                         | 46 | 65 | 2  | 23 | 56 | 43 | 642 | 715 | 42  | o | 37  | 30  |
|    |     |                                    | 72 | 50 | 71 | 86 | 94 | 83 | 454 | 853 | 45  | w | 06  | 85  |
|    |     |                                    | 5  | 2  | 78 | 9  | 1  | 9  | 418 | 333 | 44  | n | 57  | 92  |
|    |     |                                    |    |    |    |    |    |    |     |     | 18  |   | 06  | 11  |
| 37 | KCN | Potassium channel,                 | 5. | 6. | 6. | 4. | 5. | 4. | -1. | -0. | 1.9 | D | 0.0 | 0.9 |
| 82 | N3  | calcium activated                  | 17 | 75 | 24 | 85 | 44 | 94 | 969 | 977 | 69  | o | 36  | 30  |
|    |     | intermediate/small                 | 74 | 90 | 52 | 76 | 94 | 2  | 186 | 6   | 18  | w | 02  | 85  |
|    |     | conductance                        | 8  | 6  | 8  | 1  | 1  |    | 836 |     | 68  | n | 50  | 92  |
|    |     | subfamily N $\alpha$ ,<br>member 3 |    |    |    |    |    |    |     |     | 36  |   | 6   | 11  |
| 58 | ABC | ATP binding                        | 5. | 5. | 5. | 4. | 4. | 4. | -1. | -0. | 1.6 | D | 0.0 | 0.9 |
| 25 | D3  | cassette subfamily                 | 28 | 63 | 59 | 99 | 69 | 71 | 626 | 701 | 26  | o | 02  | 30  |
|    |     | D member 3                         | 62 | 45 | 35 | 68 | 9  | 28 | 608 | 866 | 60  | w | 76  | 85  |
|    |     |                                    | 3  | 3  | 9  | 6  |    | 9  | 059 | 667 | 80  | n | 53  | 92  |
|    |     |                                    |    |    |    |    |    |    |     |     | 59  |   | 19  | 11  |
| 22 | FKB | FK506 binding                      | 8. | 7. | 7. | 7. | 6. | 7. | -1. | -0. | 1.5 | D | 0.0 | 0.9 |
| 80 | P1A | protein 1A                         | 13 | 27 | 83 | 01 | 99 | 25 | 581 | 661 | 81  | o | 21  | 30  |
|    |     |                                    | 21 | 90 | 22 | 03 | 13 | 66 | 927 | 683 | 92  | w | 67  | 85  |
|    |     |                                    | 4  | 5  | 4  | 3  | 9  | 6  | 337 | 333 | 73  | n | 04  | 92  |
|    |     |                                    |    |    |    |    |    |    |     |     | 37  |   | 83  | 11  |
| 51 | TAF | TATA-box binding                   | 4. | 5. | 5. | 4. | 3. | 4. | -1. | -0. | 1.8 | D | 0.0 | 0.9 |
| 61 | 9B  | protein associated                 | 62 | 32 | 57 | 58 | 91 | 38 | 844 | 882 | 44  | o | 13  | 30  |
| 6  |     | factor 9b                          | 65 | 87 | 71 | 30 | 97 | 10 | 044 | 873 | 04  | w | 40  | 85  |
|    |     |                                    | 6  | 8  | 8  | 9  | 9  | 2  | 324 | 333 | 43  | n | 46  | 92  |
|    |     |                                    |    |    |    |    |    |    |     |     | 24  |   | 98  | 11  |
| 74 | VBP | Von Hippel-Lindau                  | 5. | 5. | 6. | 5. | 5. | 5. | -1. | -0. | 1.6 | D | 0.0 | 0.9 |
| 11 | 1   | binding protein 1                  | 67 | 69 | 58 | 28 | 08 | 39 | 655 | 727 | 55  | o | 24  | 30  |



|    |      |                       |    |    |    |    |    |    |     |     |     |   |     |     |
|----|------|-----------------------|----|----|----|----|----|----|-----|-----|-----|---|-----|-----|
|    |      |                       | 14 | 23 | 10 | 64 | 44 | 14 | 759 | 493 | 75  | w | 45  | 85  |
|    |      |                       | 7  | 1  | 9  | 4  | 6  | 9  | 727 | 333 | 97  | n | 01  | 92  |
|    |      |                       |    |    |    |    |    |    |     |     | 27  |   | 93  | 11  |
| 11 | TRI  | Tripartite motif      | 8. | 8. | 7. | 7. | 7. | 7. | -1. | -0. | 1.6 | D | 0.0 | 0.9 |
| 40 | M9   | containing 9          | 63 | 28 | 88 | 21 | 82 | 61 | 642 | 716 | 42  | o | 18  | 30  |
| 88 |      |                       | 47 | 45 | 31 | 45 | 65 | 25 | 898 | 243 | 89  | w | 25  | 85  |
|    |      |                       | 7  |    | 9  | 8  | 7  | 8  | 479 | 333 | 84  | n | 22  | 92  |
|    |      |                       |    |    |    |    |    |    |     |     | 79  |   | 44  | 11  |
| 27 | GNG  | Guanine nucleotide    | 7. | 8. | 8. | 6. | 7. | 7. | -1. | -0. | 1.7 | D | 0.0 | 0.9 |
| 91 | 11   | binding protein (G    | 72 | 42 | 52 | 98 | 77 | 57 | 713 | 777 | 13  | o | 24  | 30  |
|    |      | protein), $\gamma$ 11 | 85 | 43 | 04 | 99 | 75 | 40 | 884 | 27  | 88  | w | 76  | 85  |
|    |      |                       | 8  |    | 2  | 2  | 2  | 5  | 633 |     | 46  | n | 58  | 92  |
|    |      |                       |    |    |    |    |    |    |     |     | 33  |   | 91  | 11  |
| 10 | C1Q  | C1QTNF3-AMAC          | 6. | 6. | 6. | 5. | 5. | 5. | -1. | -0. | 1.7 | D | 0.0 | 0.9 |
| 05 | TNF  | R readthrough         | 29 | 20 | 52 | 76 | 12 | 71 | 749 | 807 | 49  | o | 05  | 30  |
| 34 | 3-A  | (NMD candidate)       | 64 | 38 | 27 | 15 | 54 | 42 | 925 | 293 | 92  | w | 17  | 85  |
| 61 | MAC  |                       | 7  | 5  | 6  | 6  |    | 4  | 294 | 333 | 52  | n | 56  | 92  |
| 2  | R    |                       |    |    |    |    |    |    |     |     | 94  |   | 18  | 11  |
| 89 | SKA  | Src kinase            | 4. | 4. | 4. | 3. | 3. | 4. | -1. | -0. | 1.5 | D | 0.0 | 0.9 |
| 35 | P2   | associated            | 05 | 09 | 70 | 28 | 69 | 08 | 513 | 597 | 13  | o | 44  | 30  |
|    |      | phosphoprotein 2      | 74 | 72 | 36 | 07 | 67 | 75 | 420 | 813 | 42  | w | 01  | 85  |
|    |      |                       | 7  | 3  | 9  |    | 5  |    | 963 | 333 | 09  | n | 71  | 92  |
|    |      |                       |    |    |    |    |    |    |     |     | 63  |   | 8   | 11  |
| 55 | SPT  | Serine                | 5. | 5. | 5. | 6. | 6. | 5. | 1.5 | 0.5 | 1.5 | U | 0.0 | 0.9 |
| 30 | LC3  | palmitoyltransferas   | 43 | 37 | 64 | 35 | 14 | 71 | 011 | 861 | 01  | p | 18  | 30  |
| 4  |      | e, long chain base    | 47 | 08 | 63 | 41 | 60 | 00 | 831 |     | 18  |   | 97  | 85  |
|    |      | subunit 3             | 9  | 6  | 7  | 7  | 9  | 6  | 48  |     | 31  |   | 00  | 92  |
|    |      |                       |    |    |    |    |    |    |     |     | 48  |   | 08  | 11  |
| 61 | RPS5 | Ribosomal protein     | 11 | 12 | 12 | 11 | 10 | 11 | -1. | -0. | 1.6 | D | 0.0 | 0.9 |

|               |            |                                                      |                     |                     |                     |                     |                     |                     |                          |                          |                             |                  |                             |                             |
|---------------|------------|------------------------------------------------------|---------------------|---------------------|---------------------|---------------------|---------------------|---------------------|--------------------------|--------------------------|-----------------------------|------------------|-----------------------------|-----------------------------|
| 93            |            | S5                                                   | .6<br>89<br>81      | .0<br>09<br>01      | .3<br>62<br>23      | .2<br>21<br>73      | .9<br>78<br>84      | .8<br>06<br>77      | 607<br>222<br>872        | 684<br>57                | 07<br>22<br>28<br>72        | o<br>w<br>n      | 25<br>45<br>12<br>03        | 30<br>85<br>92<br>11        |
| 20<br>53      | EPH<br>X2  | Epoxide hydrolase<br>2, cytoplasmic                  | 6.<br>71<br>42<br>1 | 6.<br>74<br>27<br>8 | 7.<br>04<br>66<br>8 | 6.<br>18<br>30<br>2 | 6.<br>12<br>97<br>7 | 6.<br>35<br>97<br>7 | -1.<br>526<br>650<br>69  | -0.<br>610<br>37         | 1.5<br>26<br>65<br>06<br>9  | D<br>o<br>w<br>n | 0.0<br>05<br>52<br>97<br>51 | 0.9<br>30<br>85<br>92<br>11 |
| 77<br>84      | ZP3        | Zona pellucida<br>glycoprotein 3<br>(sperm receptor) | 5.<br>34<br>23<br>1 | 5.<br>39<br>73<br>4 | 5.<br>38<br>75<br>8 | 5.<br>66<br>74<br>7 | 6.<br>99<br>16<br>9 | 7.<br>27<br>34<br>8 | 2.4<br>090<br>594<br>56  | 1.2<br>684<br>7          | 2.4<br>09<br>05<br>94<br>56 | U<br>p           | 0.0<br>11<br>25<br>64<br>15 | 0.9<br>30<br>85<br>92<br>11 |
| 57<br>48<br>4 | RNF<br>150 | Ring finger protein<br>150                           | 6.<br>73<br>94<br>1 | 6.<br>06<br>37<br>8 | 5.<br>99<br>98<br>9 | 4.<br>20<br>86<br>1 | 6.<br>11<br>44<br>8 | 4.<br>86<br>53<br>8 | -2.<br>305<br>207<br>577 | -1.<br>204<br>896<br>667 | 2.3<br>05<br>20<br>75<br>77 | D<br>o<br>w<br>n | 0.0<br>31<br>45<br>70<br>76 | 0.9<br>30<br>85<br>92<br>11 |
| 41<br>79      | CD4<br>6   | CD46 molecule,<br>complement<br>regulatory protein   | 7.<br>04<br>58<br>1 | 7.<br>55<br>04<br>3 | 8.<br>04<br>22<br>1 | 7.<br>07<br>53<br>8 | 5.<br>27<br>69<br>7 | 6.<br>88<br>01<br>7 | -2.<br>196<br>657<br>585 | -1.<br>135<br>31         | 2.1<br>96<br>65<br>75<br>85 | D<br>o<br>w<br>n | 0.0<br>47<br>23<br>15<br>83 | 0.9<br>30<br>85<br>92<br>11 |
| 11<br>23      | CHN<br>1   | Chimerin 1                                           | 4.<br>70<br>84<br>2 | 4.<br>56<br>10<br>7 | 5.<br>01<br>68<br>2 | 3.<br>93<br>97<br>6 | 3.<br>93<br>74<br>1 | 4.<br>63<br>34<br>6 | -1.<br>507<br>223<br>468 | -0.<br>591<br>893<br>333 | 1.5<br>07<br>22<br>34<br>68 | D<br>o<br>w<br>n | 0.0<br>30<br>31<br>31<br>52 | 0.9<br>30<br>85<br>92<br>11 |

|               |            |                                               |                     |                     |                     |                     |                     |                     |                          |                              |                             |                  |                             |                             |
|---------------|------------|-----------------------------------------------|---------------------|---------------------|---------------------|---------------------|---------------------|---------------------|--------------------------|------------------------------|-----------------------------|------------------|-----------------------------|-----------------------------|
| 12<br>64      | CNN<br>1   | Calponin 1, basic,<br>smooth muscle           | 7.<br>82<br>78<br>4 | 8.<br>80<br>96<br>9 | 9.<br>14<br>23<br>9 | 4.<br>88<br>84<br>6 | 8.<br>36<br>55<br>2 | 5.<br>38<br>20<br>3 | -5.<br>209<br>963<br>746 | -2.<br>381<br>273<br>333     | 5.2<br>09<br>96<br>37<br>46 | D<br>o<br>w<br>n | 0.0<br>23<br>97<br>62<br>88 | 0.9<br>30<br>85<br>92<br>11 |
| 64<br>26      | SRS<br>F1  | Serine/arginine-ric<br>h splicing factor 1    | 7.<br>01<br>08<br>4 | 7.<br>54<br>78<br>2 | 7.<br>79<br>51<br>7 | 6.<br>88<br>77<br>2 | 6.<br>14<br>36<br>9 | 6.<br>96<br>17<br>8 | -1.<br>725<br>339<br>173 | -0.<br>786<br>88<br>91<br>73 | 1.7<br>25<br>33<br>91<br>73 | D<br>o<br>w<br>n | 0.0<br>25<br>43<br>59<br>46 | 0.9<br>30<br>85<br>92<br>11 |
| 48<br>83      | NPR<br>3   | Natriuretic peptide<br>receptor 3             | 6.<br>45<br>43      | 7.<br>51<br>93<br>5 | 7.<br>59<br>51<br>1 | 5.<br>82<br>80<br>1 | 6.<br>13<br>21<br>9 | 5.<br>66<br>60<br>2 | -2.<br>486<br>609<br>564 | -1.<br>314<br>18<br>95<br>64 | 2.4<br>86<br>60<br>95<br>64 | D<br>o<br>w<br>n | 0.0<br>03<br>35<br>64<br>9  | 0.9<br>30<br>85<br>92<br>11 |
| 57<br>53<br>8 | ALP<br>K3  | A kinase 3                                    | 5.<br>52<br>25<br>7 | 5.<br>29<br>69<br>9 | 5.<br>46<br>26<br>9 | 6.<br>58<br>46<br>6 | 5.<br>82<br>90<br>3 | 5.<br>87<br>62<br>6 | 1.5<br>902<br>607<br>44  | 0.6<br>692<br>633<br>33      | 1.5<br>90<br>26<br>07<br>44 | U<br>p           | 0.0<br>18<br>41<br>72<br>55 | 0.9<br>30<br>85<br>92<br>11 |
| 55<br>22<br>8 | PNM<br>AL1 | Paraneoplastic Ma<br>antigen family-like<br>1 | 5.<br>76<br>63<br>6 | 5.<br>69<br>68<br>3 | 6.<br>42<br>60<br>2 | 3.<br>46<br>11<br>3 | 5.<br>55<br>25<br>1 | 3.<br>91<br>70<br>1 | -3.<br>144<br>556<br>738 | -1.<br>652<br>856<br>667     | 3.1<br>44<br>55<br>67<br>38 | D<br>o<br>w<br>n | 0.0<br>12<br>08<br>97<br>01 | 0.9<br>30<br>85<br>92<br>11 |
| 92<br>8       | CD9        | CD9 molecule                                  | 8.<br>63<br>24<br>1 | 9.<br>38<br>12<br>1 | 9.<br>88<br>01<br>8 | 7.<br>26<br>12<br>5 | 8.<br>56<br>25<br>5 | 8.<br>33<br>25<br>6 | -2.<br>371<br>522<br>134 | -1.<br>245<br>813<br>333     | 2.3<br>71<br>52<br>21       | D<br>o<br>w<br>n | 0.0<br>17<br>04<br>72       | 0.9<br>30<br>85<br>92       |

|               |                   |                                                             |                     |                      |                     |                     |                     |                      |                          |                          |                             |                  |                             |                             |
|---------------|-------------------|-------------------------------------------------------------|---------------------|----------------------|---------------------|---------------------|---------------------|----------------------|--------------------------|--------------------------|-----------------------------|------------------|-----------------------------|-----------------------------|
|               |                   |                                                             |                     |                      |                     |                     |                     |                      |                          |                          | 34                          |                  | 02                          | 11                          |
| 58<br>49<br>4 | JAM<br>2          | Junctional adhesion<br>molecule 2                           | 3.<br>68<br>76<br>5 | 4.<br>64<br>65<br>4  | 4.<br>48<br>99<br>9 | 3.<br>05<br>46<br>6 | 3.<br>86<br>49<br>2 | 3.<br>67<br>33<br>2  | -1.<br>674<br>542<br>122 | -0.<br>743<br>766<br>667 | 1.6<br>74<br>54<br>21<br>22 | D<br>o<br>w<br>n | 0.0<br>37<br>51<br>26<br>88 | 0.9<br>30<br>85<br>92<br>11 |
| 15<br>43      | CYP<br>1A1        | Cytochrome P450,<br>family 1, subfamily<br>A, polypeptide 1 | 7.<br>94<br>26<br>4 | 9.<br>51<br>39<br>4  | 7.<br>35<br>82<br>9 | 10<br>.9<br>90<br>9 | 8.<br>89<br>16<br>3 | 9.<br>73<br>73<br>57 | 3.0<br>349<br>091<br>57  | 1.6<br>016<br>533<br>33  | 3.0<br>34<br>90<br>91<br>57 | U<br>p           | 0.0<br>41<br>31<br>25<br>15 | 0.9<br>30<br>85<br>92<br>11 |
| 34<br>94      | IGH<br>A2         | Immunoglobulin<br>heavy constant $\alpha$ 2<br>(A2m marker) | 8.<br>29<br>12<br>4 | 9.<br>48<br>48<br>6  | 8.<br>88<br>50<br>7 | 7.<br>93<br>20<br>4 | 8.<br>11<br>57<br>9 | 7.<br>70<br>46<br>1  | -1.<br>958<br>265<br>892 | -0.<br>969<br>576<br>667 | 1.9<br>58<br>26<br>58<br>92 | D<br>o<br>w<br>n | 0.0<br>111<br>20<br>09<br>9 | 0.9<br>30<br>85<br>92<br>11 |
| 38<br>56      | KRT<br>8          | Keratin 8, type II                                          | 9.<br>71<br>6       | 10<br>.3<br>32<br>54 | 9.<br>64<br>00<br>6 | 9.<br>25<br>83<br>2 | 8.<br>47<br>07<br>2 | 9.<br>03<br>51<br>2  | -1.<br>965<br>386<br>884 | -0.<br>974<br>813<br>333 | 1.9<br>65<br>38<br>68<br>84 | D<br>o<br>w<br>n | 0.0<br>06<br>10<br>73<br>33 | 0.9<br>30<br>85<br>92<br>11 |
| 79<br>80<br>4 | HAN<br>D2-A<br>S1 | HAND2 antisense<br>RNA 1 (head to<br>head)                  | 5.<br>35<br>46<br>4 | 6.<br>61<br>99<br>8  | 6.<br>76<br>95<br>4 | 4.<br>05<br>78<br>8 | 5.<br>95<br>25<br>6 | 4.<br>38<br>73<br>2  | -2.<br>729<br>808<br>978 | -1.<br>448<br>8<br>978   | 2.7<br>29<br>80<br>89<br>78 | D<br>o<br>w<br>n | 0.0<br>31<br>01<br>93<br>33 | 0.9<br>30<br>85<br>92<br>11 |
| 29<br>92      | GYG<br>1          | Glycogenin 1                                                | 5.<br>59<br>04      | 5.<br>89<br>02       | 6.<br>76<br>06      | 5.<br>30<br>25      | 4.<br>86<br>41      | 5.<br>68<br>49       | -1.<br>736<br>982        | -0.<br>796<br>583        | 1.7<br>36<br>98             | D<br>o<br>w      | 0.0<br>44<br>95             | 0.9<br>30<br>85             |

|    |     |                   |    |    |    |    |    |    |     |     |     |   |     |     |
|----|-----|-------------------|----|----|----|----|----|----|-----|-----|-----|---|-----|-----|
|    |     |                   | 8  | 2  | 3  | 1  | 3  | 4  | 638 | 333 | 26  | n | 09  | 92  |
|    |     |                   |    |    |    |    |    |    |     |     | 38  |   | 37  | 11  |
| 26 | GEM | GTP binding       | 4. | 6. | 6. | 3. | 5. | 4. | -2. | -1. | 2.5 | D | 0.0 | 0.9 |
| 69 |     | protein           | 73 | 52 | 10 | 68 | 25 | 37 | 555 | 353 | 55  | o | 34  | 30  |
|    |     | overexpressed in  | 70 | 94 | 46 | 37 | 07 | 49 | 962 | 866 | 96  | w | 18  | 85  |
|    |     | skeletal muscle   | 7  |    | 1  | 2  | 9  | 7  | 494 | 667 | 24  | n | 98  | 92  |
|    |     |                   |    |    |    |    |    |    |     |     | 94  |   | 13  | 11  |
| 58 | RAD | RAD21 cohesin     | 7. | 7. | 7. | 6. | 6. | 6. | -1. | -0. | 1.5 | D | 0.0 | 0.9 |
| 85 | 21  | complex           | 45 | 16 | 04 | 72 | 50 | 60 | 527 | 611 | 27  | o | 06  | 30  |
|    |     | component         | 54 | 33 | 72 | 69 | 15 | 27 | 977 | 623 | 97  | w | 22  | 85  |
|    |     |                   | 8  | 8  | 8  | 8  | 6  | 3  | 536 | 333 | 75  | n | 15  | 92  |
|    |     |                   |    |    |    |    |    |    |     |     | 36  |   | 33  | 11  |
| 72 | TXN | Thioredoxin       | 6. | 6. | 7. | 5. | 5. | 5. | -2. | -1. | 2.1 | D | 0.0 | 0.9 |
| 96 | RD1 | reductase 1       | 42 | 40 | 32 | 79 | 26 | 72 | 179 | 123 | 79  | o | 04  | 30  |
|    |     |                   | 31 | 38 | 77 | 08 | 39 | 89 | 040 | 693 | 04  | w | 56  | 85  |
|    |     |                   | 9  | 7  | 1  |    | 1  | 8  | 987 | 333 | 09  | n | 50  | 92  |
|    |     |                   |    |    |    |    |    |    |     |     | 87  |   | 93  | 11  |
| 55 | AIM | Absent in         | 5. | 4. | 5. | 7. | 7. | 5. | 2.8 | 1.4 | 2.8 | U | 0.0 | 0.9 |
| 05 | 1L  | melanoma 1-like   | 63 | 90 | 32 | 53 | 50 | 31 | 267 | 991 | 26  | p | 31  | 30  |
| 7  |     |                   | 22 | 33 | 60 | 63 | 83 | 43 | 350 | 366 | 73  |   | 48  | 85  |
|    |     |                   | 2  | 6  | 4  |    | 9  | 4  | 52  | 67  | 50  |   | 10  | 92  |
|    |     |                   |    |    |    |    |    |    |     |     | 52  |   | 94  | 11  |
| 26 | EHF | Ets homologous    | 5. | 5. | 6. | 5. | 4. | 5. | -1. | -0. | 1.5 | D | 0.0 | 0.9 |
| 29 |     | factor            | 54 | 68 | 07 | 48 | 61 | 29 | 556 | 638 | 56  | o | 38  | 30  |
| 8  |     |                   | 22 | 99 | 09 | 11 | 47 | 15 | 806 | 59  | 80  | w | 17  | 85  |
|    |     |                   | 9  |    | 8  | 2  | 7  | 1  | 89  |     | 68  | n | 83  | 92  |
|    |     |                   |    |    |    |    |    |    |     |     | 9   |   | 43  | 11  |
| 57 | AS3 | Arsenite          | 7. | 7. | 7. | 7. | 7. | 8. | 1.5 | 0.6 | 1.5 | U | 0.0 | 0.9 |
| 41 | MT  | methyltransferase | 59 | 62 | 60 | 88 | 94 | 79 | 172 | 014 | 17  | p | 42  | 30  |

|    |     |                     |    |    |    |    |    |    |     |     |     |   |     |     |
|----|-----|---------------------|----|----|----|----|----|----|-----|-----|-----|---|-----|-----|
| 2  |     |                     | 26 | 67 | 36 | 34 | 92 | 47 | 792 | 866 | 27  |   | 18  | 85  |
|    |     |                     |    |    | 1  | 1  | 5  | 1  | 85  | 67  | 92  |   | 65  | 92  |
|    |     |                     |    |    |    |    |    |    |     |     | 85  |   | 67  | 11  |
| 44 | MT1 | Metallothionein     | 6. | 5. | 5. | 7. | 7. | 7. | 2.4 | 1.3 | 2.4 | U | 0.0 | 0.9 |
| 99 | M   | 1M                  | 98 | 73 | 72 | 76 | 01 | 62 | 945 | 187 | 94  | p | 08  | 30  |
|    |     |                     | 67 | 73 | 47 | 90 | 23 | 38 | 449 | 766 | 54  |   | 00  | 85  |
|    |     |                     | 9  | 6  | 2  | 6  | 2  | 2  | 51  | 67  | 49  |   | 88  | 92  |
|    |     |                     |    |    |    |    |    |    |     |     | 51  |   | 79  | 11  |
| 79 | MA  | Mannosidase,        | 5. | 5. | 6. | 5. | 4. | 5. | -1. | -0. | 1.7 | D | 0.0 | 0.9 |
| 69 | NEA | endo- $\alpha$      | 54 | 75 | 22 | 28 | 52 | 30 | 742 | 801 | 42  | o | 18  | 30  |
| 4  |     |                     | 78 | 01 | 91 | 50 | 88 | 84 | 984 | 56  | 98  | w | 18  | 85  |
|    |     |                     | 3  | 6  |    | 3  | 9  | 9  | 814 |     | 48  | n | 09  | 92  |
|    |     |                     |    |    |    |    |    |    |     |     | 14  |   | 29  | 11  |
| 64 | ERA | Endoplasmic         | 4. | 5. | 7. | 7. | 6. | 8. | 3.1 | 1.6 | 3.1 | U | 0.0 | 0.9 |
| 16 | P2  | reticulum           | 88 | 34 | 40 | 25 | 90 | 47 | 751 | 668 | 75  | p | 39  | 30  |
| 7  |     | aminopeptidase 2    | 65 | 79 | 01 | 76 | 10 | 64 | 688 | 333 | 16  |   | 26  | 85  |
|    |     |                     | 1  | 8  | 9  | 4  | 6  | 8  | 93  | 33  | 88  |   | 04  | 92  |
|    |     |                     |    |    |    |    |    |    |     |     | 93  |   | 57  | 11  |
| 84 | SPA | SPARC like 1        | 8. | 9. | 10 | 6. | 8. | 8. | -3. | -1. | 3.5 | D | 0.0 | 0.9 |
| 04 | RCL |                     | 70 | 73 | .0 | 20 | 75 | 02 | 570 | 836 | 70  | o | 21  | 30  |
|    | 1   |                     | 99 | 11 | 50 | 23 | 18 | 83 | 823 | 256 | 82  | w | 18  | 85  |
|    |     |                     | 6  | 8  | 2  | 4  | 5  | 8  | 107 | 667 | 31  | n | 03  | 92  |
|    |     |                     |    |    |    |    |    |    |     |     | 07  |   | 45  | 11  |
| 36 | ITG | Integrin $\alpha$ 9 | 5. | 5. | 6. | 3. | 5. | 4. | -3. | -1. | 3.0 | D | 0.0 | 0.9 |
| 80 | A9  |                     | 47 | 94 | 60 | 29 | 64 | 26 | 039 | 603 | 39  | o | 22  | 30  |
|    |     |                     | 66 | 54 | 55 | 98 | 96 | 71 | 140 | 663 | 14  | w | 44  | 85  |
|    |     |                     | 2  | 7  | 8  | 8  | 8  | 2  | 418 | 333 | 04  | n | 04  | 92  |
|    |     |                     |    |    |    |    |    |    |     |     | 18  |   | 58  | 11  |
| 27 | TIN | Tubulointerstitial  | 4. | 3. | 3. | 4. | 5. | 3. | 1.9 | 0.9 | 1.9 | U | 0.0 | 0.9 |



|    |      |                                                                              |    |    |    |    |    |    |     |     |     |   |     |     |
|----|------|------------------------------------------------------------------------------|----|----|----|----|----|----|-----|-----|-----|---|-----|-----|
| 68 | SUL  | Sulfotransferase                                                             | 9. | 9. | 8. | 10 | 9. | 10 | 1.7 | 0.8 | 1.7 | U | 0.0 | 0.9 |
| 19 | T1C2 | family 1C member 2                                                           | 73 | 03 | 87 | .5 | 62 | .0 | 821 | 336 | 82  | p | 21  | 30  |
|    |      |                                                                              | 75 | 07 | 17 | 00 | 69 | 13 | 638 | 3   | 16  |   | 51  | 85  |
|    |      |                                                                              | 3  | 2  | 2  | 08 | 5  | 83 | 71  |     | 38  |   | 84  | 92  |
|    |      |                                                                              |    |    |    |    |    |    |     |     | 71  |   | 42  | 11  |
| 29 | SLC  | Solute carrier                                                               | 6. | 6. | 7. | 6. | 5. | 6. | -1. | -0. | 1.7 | D | 0.0 | 0.9 |
| 1  | 25A4 | family 25 (mitochondrial carrier; adenine nucleotide translocator), member 4 | 75 | 95 | 51 | 56 | 95 | 32 | 728 | 789 | 28  | o | 13  | 30  |
|    |      |                                                                              | 64 | 81 | 05 | 86 | 96 | 81 | 507 | 526 | 50  | w | 04  | 85  |
|    |      |                                                                              |    | 2  | 5  | 5  | 5  | 9  | 264 | 667 | 72  | n | 88  | 92  |
|    |      |                                                                              |    |    |    |    |    |    |     |     | 64  |   | 39  | 11  |
| 2  | A2M  | A-2-macroglobulin                                                            | 10 | 10 | 11 | 9. | 10 | 10 | -1. | -0. | 1.9 | D | 0.0 | 0.9 |
|    |      |                                                                              | .7 | .7 | .2 | 05 | .6 | .1 | 942 | 957 | 42  | o | 36  | 30  |
|    |      |                                                                              | 93 | 89 | 03 | 23 | 66 | 94 | 251 | 73  | 25  | w | 02  | 85  |
|    |      |                                                                              | 45 | 26 | 52 | 9  | 27 | 38 | 465 |     | 14  | n | 41  | 92  |
|    |      |                                                                              |    |    |    |    |    |    |     |     | 65  |   | 52  | 11  |
| 57 | ARR  | Arrestin domain                                                              | 4. | 5. | 5. | 4. | 4. | 4. | -1. | -0. | 1.5 | D | 0.0 | 0.9 |
| 56 | DC3  | containing 3                                                                 | 87 | 28 | 13 | 41 | 31 | 71 | 532 | 615 | 32  | o | 07  | 30  |
| 1  |      |                                                                              | 36 | 43 | 08 | 29 | 14 | 78 | 099 | 51  | 09  | w | 27  | 85  |
|    |      |                                                                              |    | 3  | 3  | 2  | 7  | 4  | 506 |     | 95  | n | 73  | 92  |
|    |      |                                                                              |    |    |    |    |    |    |     |     | 06  |   | 58  | 11  |
| 30 | HAB  | Hyaluronan                                                                   | 7. | 8. | 8. | 7. | 6. | 7. | -1. | -0. | 1.7 | D | 0.0 | 0.9 |
| 26 | P2   | binding protein 2                                                            | 46 | 08 | 16 | 07 | 86 | 32 | 761 | 817 | 61  | o | 07  | 30  |
|    |      |                                                                              | 63 | 13 | 53 | 41 | 56 | 19 | 901 | 133 | 90  | w | 30  | 85  |
|    |      |                                                                              | 8  | 5  | 1  |    | 1  | 3  | 575 | 333 | 15  | n | 67  | 92  |
|    |      |                                                                              |    |    |    |    |    |    |     |     | 75  |   | 61  | 11  |
| 65 | SLC  | Solute carrier                                                               | 6. | 6. | 5. | 7. | 6. | 6. | 1.8 | 0.8 | 1.8 | U | 0.0 | 0.9 |
| 80 | 22A1 | family 22 (organic                                                           | 10 | 12 | 84 | 17 | 72 | 81 | 402 | 799 | 40  | p | 01  | 30  |



|                           |                         |                                                                   |                      |                      |                      |                     |                      |                     |                          |                          |                             |                  |                             |                             |
|---------------------------|-------------------------|-------------------------------------------------------------------|----------------------|----------------------|----------------------|---------------------|----------------------|---------------------|--------------------------|--------------------------|-----------------------------|------------------|-----------------------------|-----------------------------|
|                           |                         | cation transporter),<br>member 1                                  | 44<br>1              | 30<br>8              | 80<br>3              | 48                  | 65                   | 39<br>7             | 69                       | 166<br>67                | 26<br>9                     |                  | 22<br>23<br>89              | 85<br>92<br>11              |
| 40<br>13                  | VWA<br>5A               | Von Willebrand<br>factor A domain<br>containing 5A                | 5.<br>71<br>44<br>1  | 5.<br>84<br>81<br>3  | 6.<br>10<br>33<br>6  | 5.<br>05<br>75<br>6 | 5.<br>45<br>21<br>9  | 5.<br>37<br>09<br>9 | -1.<br>510<br>507<br>485 | -0.<br>595<br>033<br>333 | 1.5<br>10<br>50<br>74<br>85 | D<br>o<br>w<br>n | 0.0<br>09<br>99<br>34<br>91 | 0.9<br>30<br>85<br>92<br>11 |
| 10<br>01<br>27<br>88<br>8 | SLC<br>O4A<br>1-AS<br>1 | SLCO4A1<br>antisense RNA 1                                        | 5.<br>39<br>29<br>2  | 4.<br>41<br>67<br>5  | 4.<br>58<br>93<br>9  | 7.<br>00<br>29<br>8 | 5.<br>38<br>17<br>9  | 6.<br>29<br>62<br>3 | 2.6<br>894<br>540<br>37  | 1.4<br>273<br>133<br>33  | 2.6<br>89<br>45<br>40<br>37 | U<br>p           | 0.0<br>10<br>48<br>40<br>6  | 0.9<br>30<br>85<br>92<br>11 |
| 31<br>23                  | HLA<br>-DR<br>B1        | Major<br>histocompatibility<br>complex, class II,<br>DR $\beta$ 1 | 10<br>.1<br>20<br>15 | 10<br>.2<br>33<br>12 | 11<br>.0<br>53<br>67 | 9.<br>24<br>28<br>4 | 10<br>.0<br>67<br>13 | 9.<br>22<br>63<br>2 | -1.<br>941<br>111<br>961 | -0.<br>956<br>883<br>333 | 1.9<br>411<br>11<br>96<br>1 | D<br>o<br>w<br>n | 0.0<br>16<br>70<br>42<br>06 | 0.9<br>30<br>85<br>92<br>11 |
| 34<br>93                  | IGH<br>A1               | Immunoglobulin<br>heavy constant $\alpha$ 1                       | 8.<br>29<br>12<br>4  | 9.<br>48<br>48<br>6  | 8.<br>88<br>50<br>7  | 7.<br>93<br>20<br>4 | 8.<br>11<br>57<br>9  | 7.<br>70<br>46<br>1 | -1.<br>958<br>265<br>892 | -0.<br>969<br>576<br>667 | 1.9<br>58<br>26<br>58<br>92 | D<br>o<br>w<br>n | 0.0<br>111<br>20<br>09<br>9 | 0.9<br>30<br>85<br>92<br>11 |
| 46<br>38                  | MYL<br>K                | Myosin light chain<br>kinase                                      | 8.<br>05<br>89<br>7  | 9.<br>21<br>15<br>2  | 10<br>.1<br>84       | 5.<br>20<br>08<br>1 | 8.<br>62<br>53<br>5  | 6.<br>62<br>08<br>7 | -5.<br>048<br>378<br>221 | -2.<br>335<br>82         | 5.0<br>48<br>37<br>82<br>21 | D<br>o<br>w<br>n | 0.0<br>27<br>07<br>11<br>76 | 0.9<br>30<br>85<br>92<br>11 |
| 57                        | SCU                     | Signal peptide,                                                   | 6.                   | 6.                   | 7.                   | 5.                  | 6.                   | 5.                  | -2.                      | -1.                      | 2.1                         | D                | 0.0                         | 0.9                         |

|    |     |                    |    |    |    |    |    |    |     |     |     |   |     |     |
|----|-----|--------------------|----|----|----|----|----|----|-----|-----|-----|---|-----|-----|
| 75 | BE2 | CUB domain,        | 77 | 86 | 63 | 44 | 81 | 79 | 107 | 075 | 07  | o | 23  | 30  |
| 8  |     | EGF-like 2         | 70 | 59 | 37 | 24 | 50 | 22 | 642 | 63  | 64  | w | 43  | 85  |
|    |     |                    | 9  | 2  | 1  | 8  | 9  | 6  | 242 |     | 22  | n | 71  | 92  |
|    |     |                    |    |    |    |    |    |    |     |     | 42  |   | 28  | 11  |
| 64 | ABC | ATP binding        | 7. | 7. | 7. | 8. | 8. | 8. | 1.7 | 0.8 | 1.7 | U | 0.0 | 0.9 |
| 24 | G5  | cassette subfamily | 49 | 96 | 53 | 77 | 00 | 71 | 847 | 357 | 84  | p | 09  | 30  |
| 0  |     | G member 5         | 34 | 21 | 21 | 71 | 53 | 22 | 351 | 1   | 73  |   | 63  | 85  |
|    |     |                    | 1  | 2  | 4  | 6  | 5  | 9  | 52  |     | 51  |   | 10  | 92  |
|    |     |                    |    |    |    |    |    |    |     |     | 52  |   | 64  | 11  |
| 34 | RSP | R-spondin 2        | 4. | 4. | 5. | 3. | 4. | 3. | -1. | -0. | 1.7 | D | 0.0 | 0.9 |
| 04 | O2  |                    | 00 | 75 | 11 | 47 | 44 | 48 | 771 | 825 | 71  | o | 46  | 30  |
| 19 |     |                    | 94 | 09 | 56 | 12 | 27 | 67 | 666 | 106 | 66  | w | 53  | 85  |
|    |     |                    | 5  | 5  | 3  |    | 6  | 5  | 023 | 667 | 60  | n | 70  | 92  |
|    |     |                    |    |    |    |    |    |    |     |     | 23  |   | 01  | 11  |
| 45 | MT1 | Metallothionein 1X | 8. | 7. | 7. | 8. | 8. | 9. | 2.0 | 1.0 | 2.0 | U | 0.0 | 0.9 |
| 01 | X   |                    | 49 | 74 | 26 | 91 | 56 | 15 | 616 | 438 | 61  | p | 10  | 30  |
|    |     |                    | 34 | 04 | 91 | 00 | 56 | 87 | 508 |     | 65  |   | 87  | 85  |
|    |     |                    | 5  | 9  | 9  | 9  | 6  | 8  | 12  |     | 08  |   | 92  | 92  |
|    |     |                    |    |    |    |    |    |    |     |     | 12  |   | 73  | 11  |
| 10 | HEL | HELLP associated   | 7. | 6. | 6. | 7. | 7. | 7. | 1.5 | 0.6 | 1.5 | U | 0.0 | 0.9 |
| 11 | LPA | long non-coding    | 13 | 74 | 56 | 41 | 60 | 32 | 487 | 311 | 48  | p | 10  | 30  |
| 01 | R   | RNA                | 93 | 95 | 14 | 61 | 66 | 09 | 847 | 366 | 78  |   | 80  | 85  |
| 69 |     |                    | 3  | 8  | 1  | 8  | 2  | 3  | 65  | 67  | 47  |   | 32  | 92  |
| 2  |     |                    |    |    |    |    |    |    |     |     | 65  |   | 2   | 11  |
| 54 | PGP | Pyroglutamyl-pepti | 7. | 7. | 6. | 7. | 7. | 7. | 1.5 | 0.6 | 1.5 | U | 0.0 | 0.9 |
| 85 | EP1 | dase I             | 41 | 09 | 92 | 88 | 90 | 46 | 192 | 033 | 19  | p | 15  | 30  |
| 8  |     |                    | 47 | 89 | 69 | 52 | 39 | 15 | 472 | 566 | 24  |   | 57  | 85  |
|    |     |                    | 8  | 8  | 6  | 5  | 7  | 7  | 35  | 67  | 72  |   | 55  | 92  |
|    |     |                    |    |    |    |    |    |    |     |     | 35  |   | 06  | 11  |

|               |                 |                                                                                            |                     |                     |                     |                     |                     |                     |                          |                          |                             |                  |                             |                             |
|---------------|-----------------|--------------------------------------------------------------------------------------------|---------------------|---------------------|---------------------|---------------------|---------------------|---------------------|--------------------------|--------------------------|-----------------------------|------------------|-----------------------------|-----------------------------|
| 31<br>09      | HLA<br>-DM<br>B | Major<br>histocompatibility<br>complex, class II,<br>DM $\beta$                            | 5.<br>77<br>12<br>9 | 5.<br>71<br>15<br>6 | 6.<br>39<br>42<br>2 | 4.<br>19<br>19<br>2 | 5.<br>13<br>40<br>2 | 5.<br>55<br>05<br>5 | -2.<br>000<br>268<br>035 | -1.<br>000<br>193<br>333 | 2.0<br>00<br>26<br>80<br>35 | D<br>o<br>w<br>n | 0.0<br>23<br>57<br>34<br>46 | 0.9<br>30<br>85<br>92<br>11 |
| 51<br>5       | ATP5<br>F1      | ATP synthase, H <sup>+</sup><br>transporting,<br>mitochondrial Fo<br>complex subunit<br>B1 | 3.<br>23<br>48<br>7 | 3.<br>89<br>18<br>5 | 3.<br>93<br>43<br>5 | 4.<br>45<br>38<br>4 | 4.<br>54<br>78<br>9 | 3.<br>82<br>80<br>7 | 1.5<br>048<br>051<br>24  | 0.5<br>895<br>766<br>67  | 1.5<br>04<br>80<br>51<br>24 | U<br>p           | 0.0<br>49<br>38<br>86<br>73 | 0.9<br>30<br>85<br>92<br>11 |
| 10<br>95<br>7 | PNR<br>C1       | Proline rich nuclear<br>receptor<br>coactivator 1                                          | 7.<br>62<br>48<br>7 | 8.<br>36<br>57<br>6 | 8.<br>10<br>04<br>8 | 7.<br>61<br>62<br>8 | 6.<br>79<br>73<br>4 | 7.<br>64<br>78<br>6 | -1.<br>598<br>305<br>657 | -0.<br>676<br>543<br>333 | 1.5<br>98<br>30<br>56<br>57 | D<br>o<br>w<br>n | 0.0<br>46<br>56<br>72<br>12 | 0.9<br>30<br>85<br>92<br>11 |
| 83<br>45<br>0 | DRC<br>3        | Dynein regulatory<br>complex subunit 3                                                     | 5.<br>81<br>50<br>7 | 5.<br>99<br>29<br>1 | 6.<br>01<br>41<br>5 | 6.<br>64<br>05<br>5 | 6.<br>99<br>16<br>8 | 6.<br>05<br>19<br>8 | 1.5<br>376<br>139<br>53  | 0.6<br>206<br>933<br>33  | 1.5<br>37<br>61<br>39<br>53 | U<br>p           | 0.0<br>34<br>69<br>87<br>15 | 0.9<br>30<br>85<br>92<br>11 |
| 22<br>99<br>8 | LIM<br>CH1      | LIM and calponin<br>homology domains<br>1                                                  | 7.<br>20<br>93      | 7.<br>64<br>25      | 7.<br>39<br>38      | 6.<br>77<br>05<br>7 | 6.<br>02<br>10<br>4 | 7.<br>18<br>74<br>9 | -1.<br>688<br>243<br>887 | -0.<br>755<br>523<br>333 | 1.6<br>88<br>24<br>38<br>87 | D<br>o<br>w<br>n | 0.0<br>34<br>22<br>95<br>56 | 0.9<br>30<br>85<br>92<br>11 |
| 56<br>84<br>9 | TCE<br>AL7      | Transcription<br>elongation factor A<br>(SII)-like 7                                       | 4.<br>73<br>29<br>1 | 5.<br>69<br>8       | 6.<br>19<br>57<br>1 | 3.<br>31<br>70<br>6 | 4.<br>95<br>41<br>7 | 4.<br>39<br>47<br>5 | -2.<br>497<br>030<br>31  | -1.<br>320<br>213<br>333 | 2.4<br>97<br>03<br>03       | D<br>o<br>w<br>n | 0.0<br>26<br>60<br>02       | 0.9<br>30<br>85<br>92       |

|    |     |                      |    |    |    |    |    |    |     |     |     |   |     |     |
|----|-----|----------------------|----|----|----|----|----|----|-----|-----|-----|---|-----|-----|
|    |     |                      |    |    |    |    |    |    |     |     | 1   |   | 57  | 11  |
| 57 | TSH | Teashirt zinc finger | 5. | 5. | 5. | 4. | 5. | 4. | -1. | -0. | 1.5 | D | 0.0 | 0.9 |
| 61 | Z3  | homeobox 3           | 34 | 41 | 73 | 72 | 41 | 56 | 508 | 593 | 08  | o | 41  | 30  |
| 6  |     |                      | 04 | 02 | 88 | 80 | 84 | 29 | 787 | 39  | 78  | w | 78  | 85  |
|    |     |                      | 8  | 5  | 8  | 6  | 6  | 2  | 888 |     | 78  | n | 75  | 92  |
|    |     |                      |    |    |    |    |    |    |     |     | 88  |   | 48  | 11  |
| 45 | MT2 | Metallothionein 2A   | 12 | 11 | 10 | 12 | 12 | 12 | 1.9 | 0.9 | 1.9 | U | 0.0 | 0.9 |
| 02 | A   |                      | .0 | .4 | .6 | .0 | .3 | .7 | 666 | 757 | 66  | p | 22  | 30  |
|    |     |                      | 72 | 28 | 81 | 25 | 51 | 31 | 178 | 166 | 61  |   | 07  | 85  |
|    |     |                      | 33 | 48 | 39 | 74 | 8  | 81 | 83  | 67  | 78  |   | 13  | 92  |
|    |     |                      |    |    |    |    |    |    |     |     | 83  |   | 65  | 11  |
| 31 | HLA | Major                | 10 | 10 | 11 | 9. | 10 | 9. | -1. | -0. | 1.9 | D | 0.0 | 0.9 |
| 25 | -DR | histocompatibility   | .1 | .2 | .0 | 24 | .0 | 22 | 941 | 956 | 411 | o | 16  | 30  |
|    | B3  | complex, class II,   | 20 | 33 | 53 | 28 | 67 | 63 | 111 | 883 | 11  | w | 70  | 85  |
|    |     | DR β 3               | 15 | 12 | 67 | 4  | 13 | 2  | 961 | 333 | 96  | n | 42  | 92  |
|    |     |                      |    |    |    |    |    |    |     |     | 1   |   | 06  | 11  |
| 94 | AKA | A-kinase anchoring   | 5. | 4. | 5. | 4. | 4. | 4. | -1. | -0. | 1.5 | D | 0.0 | 0.9 |
| 65 | P7  | protein 7            | 21 | 53 | 49 | 79 | 26 | 32 | 543 | 626 | 43  | o | 47  | 30  |
|    |     |                      | 72 | 90 | 86 | 06 | 31 | 12 | 975 | 65  | 97  | w | 59  | 85  |
|    |     |                      | 7  | 9  | 3  | 9  | 2  | 3  | 65  |     | 56  | n | 15  | 92  |
|    |     |                      |    |    |    |    |    |    |     |     | 5   |   | 99  | 11  |
| 10 | TME | Transmembrane        | 8. | 8. | 8. | 7. | 6. | 8. | -1. | -0. | 1.7 | D | 0.0 | 0.9 |
| 95 | D2  | p24 trafficking      | 05 | 17 | 70 | 73 | 72 | 03 | 758 | 814 | 58  | o | 47  | 30  |
| 9  |     | protein 2            | 80 | 33 | 65 | 78 | 36 | 22 | 960 | 723 | 96  | w | 44  | 85  |
|    |     |                      | 5  | 3  | 5  | 9  | 6  | 1  | 802 | 333 | 08  | n | 31  | 92  |
|    |     |                      |    |    |    |    |    |    |     |     | 02  |   | 4   | 11  |
| 50 | P4H | Prolyl               | 9. | 9. | 9. | 9. | 8. | 9. | -1. | -0. | 1.5 | D | 0.0 | 0.9 |
| 34 | B   | 4-hydroxylase, β     | 58 | 38 | 52 | 17 | 33 | 06 | 557 | 639 | 57  | o | 24  | 30  |
|    |     | polypeptide          | 19 | 47 | 54 | 99 | 09 | 37 | 368 | 11  | 36  | w | 83  | 85  |

|    |      |                     |    |    |    |    |    |    |     |     |     |   |     |     |
|----|------|---------------------|----|----|----|----|----|----|-----|-----|-----|---|-----|-----|
|    |      |                     |    |    | 2  | 8  | 2  | 9  | 121 |     | 81  | n | 19  | 92  |
|    |      |                     |    |    |    |    |    |    |     |     | 21  |   | 47  | 11  |
| 22 | PI16 | Peptidase inhibitor | 5. | 7. | 6. | 7. | 7. | 8. | 2.5 | 1.3 | 2.5 | U | 0.0 | 0.9 |
| 14 |      | 16                  | 99 | 53 | 48 | 14 | 98 | 86 | 119 | 287 | 11  | p | 31  | 30  |
| 76 |      |                     | 58 | 74 | 21 | 85 | 78 | 53 | 249 | 933 | 92  |   | 21  | 85  |
|    |      |                     | 1  | 7  | 1  | 6  | 3  | 8  | 02  | 33  | 49  |   | 61  | 92  |
|    |      |                     |    |    |    |    |    |    |     |     | 02  |   | 61  | 11  |
| 57 | VAT  | Vesicle amine       | 5. | 5. | 6. | 4. | 5. | 4. | -1. | -0. | 1.9 | D | 0.0 | 0.9 |
| 68 | 1L   | transport 1-like    | 76 | 68 | 26 | 29 | 87 | 65 | 949 | 962 | 49  | o | 411 | 30  |
| 7  |      |                     | 06 | 94 | 36 | 34 | 92 | 24 | 242 | 913 | 24  | w | 17  | 85  |
|    |      |                     | 6  | 6  | 6  | 2  |    | 2  | 162 | 333 | 21  | n | 40  | 92  |
|    |      |                     |    |    |    |    |    |    |     |     | 62  |   | 5   | 11  |
| 19 | EFN  | Ephrin-B2           | 5. | 6. | 6. | 5. | 5. | 5. | -1. | -0. | 1.6 | D | 0.0 | 0.9 |
| 48 | B2   |                     | 75 | 40 | 50 | 35 | 50 | 68 | 633 | 707 | 33  | o | 14  | 30  |
|    |      |                     | 66 | 08 | 85 | 22 | 47 | 58 | 224 | 723 | 22  | w | 45  | 85  |
|    |      |                     | 6  | 5  | 6  | 9  | 2  | 9  | 748 | 333 | 47  | n | 14  | 92  |
|    |      |                     |    |    |    |    |    |    |     |     | 48  |   | 79  | 11  |
| 38 | YPE  | Yippee like 2       | 9. | 9. | 9. | 8. | 8. | 8. | -1. | -0. | 1.5 | D | 0.0 | 0.9 |
| 84 | L2   |                     | 61 | 48 | 06 | 56 | 96 | 87 | 502 | 587 | 02  | o | 15  | 30  |
| 03 |      |                     | 30 | 65 | 99 | 50 | 84 | 32 | 710 | 566 | 71  | w | 38  | 85  |
|    |      |                     | 2  | 6  | 1  | 8  | 5  | 6  | 051 | 667 | 00  | n | 78  | 92  |
|    |      |                     |    |    |    |    |    |    |     |     | 51  |   | 45  | 11  |
| 25 | GAP  | Growth associated   | 6. | 5. | 5. | 4. | 5. | 4. | -2. | -1. | 2.0 | D | 0.0 | 0.9 |
| 96 | 43   | protein 43          | 25 | 61 | 54 | 26 | 28 | 73 | 060 | 042 | 60  | o | 08  | 30  |
|    |      |                     | 92 | 43 | 01 | 16 | 83 | 49 | 374 | 906 | 37  | w | 75  | 85  |
|    |      |                     | 1  | 2  | 5  | 8  | 3  | 5  | 61  | 667 | 46  | n | 36  | 92  |
|    |      |                     |    |    |    |    |    |    |     |     | 1   |   | 66  | 11  |
| 23 | PDZ  | PDZ domain          | 5. | 5. | 6. | 4. | 5. | 5. | -1. | -0. | 1.9 | D | 0.0 | 0.9 |
| 02 | RN3  | containing ring     | 13 | 97 | 64 | 47 | 27 | 11 | 951 | 964 | 51  | o | 37  | 30  |

|                |                 |                                                                |                     |                     |                     |                     |                     |                     |                          |                          |                             |                  |                             |                             |
|----------------|-----------------|----------------------------------------------------------------|---------------------|---------------------|---------------------|---------------------|---------------------|---------------------|--------------------------|--------------------------|-----------------------------|------------------|-----------------------------|-----------------------------|
| 4              |                 | finger 3                                                       | 53<br>8             | 73<br>8             | 91<br>9             | 92<br>7             | 18<br>6             | 75<br>5             | 283<br>409               | 423<br>333               | 28<br>34<br>09              | w<br>n           | 65<br>72                    | 85<br>92<br>11              |
| 22<br>09<br>88 | HNR<br>NPA<br>3 | Heterogeneous<br>nuclear<br>ribonucleoprotein<br>A3            | 5.<br>58<br>43      | 6.<br>26<br>13<br>1 | 6.<br>40<br>40<br>7 | 5.<br>45<br>97<br>5 | 4.<br>90<br>27<br>1 | 5.<br>74<br>04<br>9 | -1.<br>642<br>139<br>474 | -0.<br>715<br>576<br>667 | 1.6<br>42<br>13<br>94<br>74 | D<br>o<br>w<br>n | 0.0<br>38<br>24<br>27<br>46 | 0.9<br>30<br>85<br>92<br>11 |
| 55<br>38       | PPT1            | Palmitoyl-protein<br>thioesterase 1                            | 5.<br>96<br>61<br>6 | 6.<br>50<br>63<br>8 | 7.<br>00<br>51<br>3 | 5.<br>43<br>89<br>9 | 5.<br>10<br>14<br>7 | 5.<br>89<br>36<br>3 | -2.<br>020<br>239<br>964 | -1.<br>014<br>526<br>667 | 2.0<br>20<br>23<br>99<br>64 | D<br>o<br>w<br>n | 0.0<br>10<br>82<br>43<br>97 | 0.9<br>30<br>85<br>92<br>11 |
| 36<br>85       | ITGA<br>V       | Integrin $\alpha$ V                                            | 5.<br>38<br>63<br>4 | 5.<br>83<br>11<br>5 | 6.<br>29<br>82<br>4 | 5.<br>11<br>74<br>5 | 3.<br>60<br>53<br>2 | 5.<br>03<br>64<br>4 | -2.<br>381<br>999<br>868 | -1.<br>252<br>173<br>333 | 2.3<br>81<br>99<br>98<br>68 | D<br>o<br>w<br>n | 0.0<br>18<br>97<br>97<br>12 | 0.9<br>30<br>85<br>92<br>11 |
| 62<br>51       | RSU<br>1        | Ras suppressor<br>protein 1                                    | 7.<br>65<br>16<br>5 | 7.<br>97<br>98<br>5 | 8.<br>25<br>04<br>1 | 7.<br>14<br>65<br>9 | 7.<br>35<br>07<br>9 | 7.<br>62<br>10<br>9 | -1.<br>502<br>998<br>254 | -0.<br>587<br>843<br>333 | 1.5<br>02<br>99<br>82<br>54 | D<br>o<br>w<br>n | 0.0<br>21<br>52<br>32<br>64 | 0.9<br>30<br>85<br>92<br>11 |
| 66<br>78       | SPA<br>RC       | Secreted protein,<br>acidic,<br>cysteine-rich<br>(osteonectin) | 6.<br>44<br>59<br>4 | 6.<br>97<br>95<br>9 | 7.<br>57<br>73      | 4.<br>01<br>87<br>2 | 6.<br>14<br>02      | 6.<br>05<br>19<br>8 | -3.<br>025<br>786<br>092 | -1.<br>597<br>31         | 3.0<br>25<br>78<br>60<br>92 | D<br>o<br>w<br>n | 0.0<br>24<br>33<br>45<br>95 | 0.9<br>30<br>85<br>92<br>11 |
| 57             | CCD             | Coiled-coil domain                                             | 6.                  | 6.                  | 6.                  | 6.                  | 7.                  | 6.                  | 1.5                      | 0.6                      | 1.5                         | U                | 0.0                         | 0.9                         |

|    |      |                      |    |    |    |    |    |    |     |     |     |   |     |     |
|----|------|----------------------|----|----|----|----|----|----|-----|-----|-----|---|-----|-----|
| 82 | C181 | containing 181       | 35 | 25 | 00 | 97 | 07 | 51 | 686 | 494 | 68  | p | 111 | 30  |
| 1  |      |                      | 36 | 58 | 59 | 86 | 00 | 52 | 208 | 966 | 62  |   | 71  | 85  |
|    |      |                      | 9  | 6  | 7  | 8  | 6  | 7  | 33  | 67  | 08  |   | 37  | 92  |
|    |      |                      |    |    |    |    |    |    |     |     | 33  |   |     | 11  |
| 64 | SMI  | Small integral       | 4. | 6. | 6. | 4. | 4. | 4. | -2. | -1. | 2.4 | D | 0.0 | 0.9 |
| 45 | M10  | membrane protein     | 98 | 24 | 45 | 27 | 89 | 68 | 425 | 278 | 25  | o | 10  | 30  |
| 38 |      | 10                   | 62 | 73 | 11 | 53 | 19 | 31 | 137 | 066 | 13  | w | 31  | 85  |
|    |      |                      |    | 8  | 3  | 8  | 4  | 9  | 701 | 667 | 77  | n | 05  | 92  |
|    |      |                      |    |    |    |    |    |    |     |     | 01  |   | 59  | 11  |
| 10 | MBN  | Muscleblind-like     | 4. | 4. | 4. | 4. | 3. | 4. | -1. | -0. | 1.5 | D | 0.0 | 0.9 |
| 15 | L2   | splicing regulator 2 | 57 | 79 | 75 | 33 | 80 | 19 | 512 | 596 | 12  | o | 07  | 30  |
| 0  |      |                      | 80 | 11 | 98 | 72 | 76 | 37 | 368 | 81  | 36  | w | 43  | 85  |
|    |      |                      | 6  | 2  | 7  | 8  |    | 4  | 808 |     | 88  | n | 29  | 92  |
|    |      |                      |    |    |    |    |    |    |     |     | 08  |   | 65  | 11  |
| 27 | PCD  | Protocadherin 17     | 5. | 5. | 6. | 4. | 5. | 4. | -2. | -1. | 2.0 | D | 0.0 | 0.9 |
| 25 | H17  |                      | 75 | 86 | 34 | 55 | 56 | 68 | 075 | 053 | 75  | o | 07  | 30  |
| 3  |      |                      | 22 | 94 | 01 | 90 | 05 | 21 | 348 | 353 | 34  | w | 43  | 85  |
|    |      |                      | 6  |    | 1  | 3  | 1  | 7  | 089 | 333 | 80  | n | 43  | 92  |
|    |      |                      |    |    |    |    |    |    |     |     | 89  |   | 63  | 11  |
| 14 | TTC  | Tetratricopeptide    | 6. | 5. | 6. | 5. | 5. | 5. | -1. | -0. | 1.5 | D | 0.0 | 0.9 |
| 55 | 7B   | repeat domain 7B     | 15 | 99 | 35 | 05 | 96 | 58 | 549 | 632 | 49  | o | 32  | 30  |
| 67 |      |                      | 12 | 87 | 22 | 57 | 67 | 35 | 815 | 096 | 81  | w | 52  | 85  |
|    |      |                      | 6  | 5  | 5  | 1  | 6  |    | 703 | 667 | 57  | n | 97  | 92  |
|    |      |                      |    |    |    |    |    |    |     |     | 03  |   | 61  | 11  |
| 23 | GAB  | GABA(A)              | 7. | 7. | 7. | 7. | 7. | 6. | -1. | -0. | 1.5 | D | 0.0 | 0.9 |
| 71 | ARA  | receptor-associated  | 57 | 91 | 84 | 24 | 13 | 93 | 595 | 673 | 95  | o | 03  | 30  |
| 0  | PL1  | protein like 1       | 42 | 49 | 25 | 04 | 72 | 30 | 107 | 653 | 10  | w | 49  | 85  |
|    |      |                      | 2  | 8  | 7  | 5  | 7  | 9  | 144 | 333 | 71  | n | 06  | 92  |
|    |      |                      |    |    |    |    |    |    |     |     | 44  |   | 56  | 11  |

|    |           |                                                                              |    |    |    |    |    |    |     |     |     |   |     |     |
|----|-----------|------------------------------------------------------------------------------|----|----|----|----|----|----|-----|-----|-----|---|-----|-----|
| 70 | TIE1      | Tyrosine kinase                                                              | 5. | 5. | 6. | 4. | 5. | 4. | -1. | -0. | 1.6 | D | 0.0 | 0.9 |
| 75 |           | with                                                                         | 00 | 65 | 17 | 60 | 19 | 87 | 643 | 716 | 43  | o | 46  | 30  |
|    |           | immunoglobulin-li                                                            | 42 | 30 | 74 | 89 | 69 | 93 | 186 | 496 | 18  | w | 22  | 85  |
|    |           | ke and EGF-like                                                              | 1  | 8  | 6  | 5  | 8  | 3  | 993 | 667 | 69  | n | 58  | 92  |
|    |           | domains 1                                                                    |    |    |    |    |    |    |     |     | 93  |   | 78  | 11  |
| 13 | C4orf32   | Chromosome 4 open reading frame 32                                           | 7. | 6. | 6. | 7. | 7. | 7. | 1.5 | 0.6 | 1.5 | U | 0.0 | 0.9 |
| 27 |           |                                                                              | 13 | 74 | 56 | 41 | 60 | 32 | 487 | 311 | 48  | p | 10  | 30  |
| 20 |           |                                                                              | 93 | 95 | 14 | 61 | 66 | 09 | 847 | 366 | 78  |   | 80  | 85  |
|    |           |                                                                              | 3  | 8  | 1  | 8  | 2  | 3  | 65  | 67  | 47  |   | 32  | 92  |
|    |           |                                                                              |    |    |    |    |    |    |     |     | 65  |   | 2   | 11  |
| 10 | CDC42EP23 | CDC42 effector protein (Rho gtpase binding) 3                                | 5. | 5. | 5. | 4. | 5. | 5. | -1. | -0. | 1.5 | D | 0.0 | 0.9 |
| 60 |           |                                                                              | 17 | 70 | 82 | 68 | 02 | 20 | 511 | 595 | 11  | o | 27  | 30  |
| 2  |           |                                                                              | 48 | 32 | 36 | 56 | 47 | 46 | 083 | 583 | 08  | w | 79  | 85  |
|    |           |                                                                              | 4  | 8  | 7  | 4  | 3  | 7  | 447 | 333 | 34  | n | 20  | 92  |
|    |           |                                                                              |    |    |    |    |    |    |     |     | 47  |   | 5   | 11  |
| 91 | FCGR2C    | Fc fragment of igg, low affinity iiic, receptor for (CD32) (gene/pseudogene) | 6. | 6. | 6. | 5. | 6. | 6. | -1. | -0. | 1.6 | D | 0.0 | 0.9 |
| 03 |           |                                                                              | 86 | 75 | 81 | 45 | 71 | 13 | 637 | 711 | 37  | o | 44  | 30  |
|    |           |                                                                              | 53 | 45 | 51 | 44 | 51 | 16 | 210 | 24  | 21  | w | 11  | 85  |
|    |           |                                                                              | 4  | 1  | 2  | 8  | 2  | 5  | 699 |     | 06  | n | 55  | 92  |
|    |           |                                                                              |    |    |    |    |    |    |     |     | 99  |   | 06  | 11  |
| 14 | MT1P3     | Metallothionein 1 pseudogene 3                                               | 6. | 6. | 5. | 7. | 7. | 7. | 2.0 | 1.0 | 2.0 | U | 0.0 | 0.9 |
| 08 |           |                                                                              | 88 | 34 | 75 | 59 | 27 | 30 | 933 | 657 | 93  | p | 05  | 30  |
| 51 |           |                                                                              | 56 | 36 | 38 | 9  | 87 | 27 | 013 | 8   | 30  |   | 70  | 85  |
|    |           |                                                                              | 6  | 9  | 1  |    | 3  | 7  | 27  |     | 13  |   | 41  | 92  |
|    |           |                                                                              |    |    |    |    |    |    |     |     | 27  |   | 4   | 11  |
| 40 | LYZ       | Lysozyme                                                                     | 9. | 10 | 10 | 9. | 8. | 8. | -2. | -1. | 2.6 | D | 0.0 | 0.9 |
| 69 |           |                                                                              | 75 | .0 | .4 | 06 | 48 | 54 | 614 | 386 | 14  | o | 00  | 30  |
|    |           |                                                                              | 43 | 74 | 14 | 19 | 18 | 04 | 400 | 48  | 40  | w | 32  | 85  |
|    |           |                                                                              |    | 64 | 66 | 5  | 1  |    | 202 |     | 02  | n | 29  | 92  |



|                |              |                                                        |                     |                     |                     |                     |                     |                     |                          |                          |                             |                  |                             |                             |
|----------------|--------------|--------------------------------------------------------|---------------------|---------------------|---------------------|---------------------|---------------------|---------------------|--------------------------|--------------------------|-----------------------------|------------------|-----------------------------|-----------------------------|
|                |              |                                                        |                     |                     |                     |                     |                     |                     |                          |                          | 02                          |                  | 54                          | 11                          |
| 37<br>08       | ITPR<br>1    | Inositol<br>1,4,5-trisphosphate<br>receptor, type 1    | 6.<br>88<br>89<br>2 | 7.<br>90<br>50<br>3 | 8.<br>17<br>77<br>2 | 5.<br>29<br>90<br>5 | 7.<br>45<br>16<br>7 | 6.<br>30<br>04<br>2 | -2.<br>473<br>996<br>284 | -1.<br>306<br>843<br>333 | 2.4<br>73<br>99<br>62<br>84 | D<br>o<br>w<br>n | 0.0<br>45<br>83<br>68<br>73 | 0.9<br>30<br>85<br>92<br>11 |
| 47<br>83       | NFIL<br>3    | Nuclear factor,<br>interleukin 3<br>regulated          | 5.<br>68<br>98<br>5 | 5.<br>96<br>37<br>7 | 5.<br>53<br>93<br>8 | 4.<br>26<br>45<br>2 | 5.<br>27<br>42<br>3 | 4.<br>27<br>17<br>4 | -2.<br>184<br>803<br>202 | -1.<br>127<br>503<br>333 | 2.1<br>84<br>80<br>32<br>02 | D<br>o<br>w<br>n | 0.0<br>04<br>76<br>13<br>64 | 0.9<br>30<br>85<br>92<br>11 |
| 40<br>11<br>05 | FLJ4<br>2393 | Uncharacterized<br>LOC401105                           | 6.<br>65<br>10<br>5 | 6.<br>86<br>47<br>3 | 6.<br>42<br>09<br>7 | 5.<br>52<br>44<br>7 | 4.<br>92<br>96<br>6 | 5.<br>20<br>44<br>6 | -2.<br>687<br>099<br>978 | -1.<br>426<br>05<br>99   | 2.6<br>87<br>09<br>99<br>78 | D<br>o<br>w<br>n | 0.0<br>00<br>13<br>50<br>84 | 0.9<br>30<br>85<br>92<br>11 |
| 19<br>03       | S1PR<br>3    | Sphingosine-1-pho<br>sphate receptor 3                 | 5.<br>84<br>29<br>8 | 6.<br>35<br>26<br>9 | 7.<br>70<br>58<br>9 | 4.<br>17<br>26<br>5 | 6.<br>18<br>5<br>9  | 4.<br>49<br>48<br>9 | -3.<br>210<br>964<br>393 | -1.<br>683<br>006<br>667 | 3.2<br>10<br>96<br>43<br>93 | D<br>o<br>w<br>n | 0.0<br>27<br>56<br>08<br>11 | 0.9<br>30<br>85<br>92<br>11 |
| 34<br>26       | CFI          | Complement factor<br>I                                 | 6.<br>80<br>89<br>2 | 7.<br>12<br>93<br>1 | 7.<br>20<br>39<br>3 | 6.<br>59<br>88<br>9 | 5.<br>50<br>25<br>3 | 6.<br>62<br>10<br>4 | -1.<br>749<br>044<br>101 | -0.<br>806<br>566<br>667 | 1.7<br>49<br>04<br>41<br>01 | D<br>o<br>w<br>n | 0.0<br>32<br>95<br>79<br>47 | 0.9<br>30<br>85<br>92<br>11 |
| 11<br>69<br>85 | ARA<br>P1    | Arfgap with rhogap<br>domain, ankyrin<br>repeat and PH | 8.<br>46<br>08      | 8.<br>33<br>98      | 8.<br>01<br>66      | 7.<br>67<br>48      | 7.<br>46<br>5       | 7.<br>40<br>67      | -1.<br>689<br>855        | -0.<br>756<br>9          | 1.6<br>89<br>85             | D<br>o<br>w      | 0.0<br>02<br>27             | 0.9<br>30<br>85             |

|    |      |                     |    |    |    |    |    |    |     |     |     |   |     |     |
|----|------|---------------------|----|----|----|----|----|----|-----|-----|-----|---|-----|-----|
|    |      | domain 1            | 6  | 1  | 5  | 4  |    | 8  | 633 |     | 56  | n | 67  | 92  |
|    |      |                     |    |    |    |    |    |    |     |     | 33  |   | 16  | 11  |
| 70 | TGM  | Transglutaminase 2  | 4. | 4. | 4. | 3. | 3. | 3. | -1. | -0. | 1.7 | D | 0.0 | 0.9 |
| 52 | 2    |                     | 19 | 29 | 79 | 44 | 96 | 33 | 799 | 847 | 99  | o | 05  | 30  |
|    |      |                     | 73 | 43 | 10 | 49 | 48 | 02 | 446 | 553 | 44  | w | 19  | 85  |
|    |      |                     | 8  |    | 1  | 3  | 5  | 5  | 654 | 333 | 66  | n | 89  | 92  |
|    |      |                     |    |    |    |    |    |    |     |     | 54  |   | 57  | 11  |
| 86 | PLPP | Phospholipid        | 8. | 8. | 8. | 7. | 7. | 8. | -1. | -0. | 1.5 | D | 0.0 | 0.9 |
| 13 | 3    | phosphatase 3       | 24 | 56 | 82 | 64 | 77 | 44 | 509 | 594 | 09  | o | 45  | 30  |
|    |      |                     | 88 | 03 | 95 | 15 | 37 | 05 | 753 | 313 | 75  | w | 62  | 85  |
|    |      |                     | 6  | 9  | 1  | 4  | 8  |    | 83  | 333 | 38  | n | 26  | 92  |
|    |      |                     |    |    |    |    |    |    |     |     | 3   |   | 29  | 11  |
| 38 | HER  | Hect domain and     | 7. | 6. | 6. | 7. | 7. | 7. | 1.5 | 0.6 | 1.5 | U | 0.0 | 0.9 |
| 82 | C2P5 | RLD 2 pseudogene    | 13 | 74 | 56 | 41 | 60 | 32 | 487 | 311 | 48  | p | 10  | 30  |
| 54 |      | 5                   | 93 | 95 | 14 | 61 | 66 | 09 | 847 | 366 | 78  |   | 80  | 85  |
|    |      |                     | 3  | 8  | 1  | 8  | 2  | 3  | 65  | 67  | 47  |   | 32  | 92  |
|    |      |                     |    |    |    |    |    |    |     |     | 65  |   | 2   | 11  |
| 22 | RIM  | Regulating          | 4. | 4. | 4. | 3. | 3. | 3. | -1. | -0. | 1.5 | D | 0.0 | 0.9 |
| 99 | S1   | synaptic membrane   | 19 | 83 | 43 | 99 | 97 | 66 | 524 | 608 | 24  | o | 12  | 30  |
| 9  |      | exocytosis 1        | 36 | 58 | 58 | 37 | 76 | 95 | 310 | 156 | 31  | w | 60  | 85  |
|    |      |                     | 9  | 5  | 1  | 5  | 2  | 1  | 351 | 667 | 03  | n | 60  | 92  |
|    |      |                     |    |    |    |    |    |    |     |     | 51  |   | 44  | 11  |
| 79 | GAL  | Polypeptide         | 5. | 4. | 5. | 6. | 5. | 5. | 1.8 | 0.9 | 1.8 | U | 0.0 | 0.9 |
| 62 | NT1  | N-acetylgalactosa   | 48 | 48 | 12 | 29 | 90 | 62 | 807 | 112 | 80  | p | 13  | 30  |
| 3  | 4    | minyltransferase 14 | 01 | 71 | 77 | 89 | 54 | 45 | 133 | 8   | 71  |   | 15  | 85  |
|    |      |                     | 4  | 9  | 3  | 6  | 4  |    | 81  |     | 33  |   | 63  | 92  |
|    |      |                     |    |    |    |    |    |    |     |     | 81  |   | 65  | 11  |
| 55 | PGM  | Phosphoglucomuta    | 5. | 5. | 5. | 5. | 4. | 5. | -1. | -0. | 1.5 | D | 0.0 | 0.9 |
| 27 | 2    | se 2                | 38 | 21 | 80 | 04 | 38 | 01 | 576 | 656 | 76  | o | 25  | 30  |

|               |            |                                                |                     |                     |                     |                     |                     |                     |                          |                          |                             |                  |                             |                             |
|---------------|------------|------------------------------------------------|---------------------|---------------------|---------------------|---------------------|---------------------|---------------------|--------------------------|--------------------------|-----------------------------|------------------|-----------------------------|-----------------------------|
| 6             |            |                                                | 45<br>4             | 59<br>9             | 90<br>8             | 82<br>9             | 04<br>9             | 14<br>1             | 224<br>83                | 473<br>333               | 22<br>48<br>3               | w<br>n           | 12<br>01<br>16              | 85<br>92<br>11              |
| 80<br>76      | MFA<br>P5  | Microfibrillar<br>associated protein<br>5      | 3.<br>22<br>50<br>9 | 5.<br>60<br>77<br>7 | 3.<br>20<br>48<br>4 | 6.<br>23<br>79      | 7.<br>12<br>75<br>8 | 8.<br>66<br>21      | 10.<br>055<br>828<br>19  | 3.3<br>299<br>6          | 10.<br>05<br>58<br>28<br>19 | U<br>p           | 0.0<br>03<br>13<br>19<br>4  | 0.9<br>30<br>85<br>92<br>11 |
| 11<br>00<br>5 | SPIN<br>K5 | Serine peptidase<br>inhibitor, Kazal<br>type 5 | 6.<br>23<br>78<br>1 | 5.<br>01<br>26      | 4.<br>51<br>58<br>4 | 3.<br>30<br>18<br>6 | 4.<br>47<br>22<br>4 | 4.<br>42<br>41<br>5 | -2.<br>280<br>473<br>386 | -1.<br>189<br>333<br>333 | 2.2<br>80<br>47<br>33<br>86 | D<br>o<br>w<br>n | 0.0<br>38<br>65<br>98<br>57 | 0.9<br>30<br>85<br>92<br>11 |
| 23<br>05<br>2 | END<br>OD1 | Endonuclease<br>domain containing<br>1         | 7.<br>33<br>57<br>6 | 6.<br>18<br>52<br>7 | 5.<br>97<br>59<br>1 | 8.<br>22<br>05<br>9 | 7.<br>78<br>43<br>4 | 7.<br>52<br>90<br>4 | 2.5<br>414<br>937<br>21  | 1.3<br>456<br>766<br>67  | 2.5<br>41<br>49<br>37<br>21 | U<br>p           | 0.0<br>06<br>53<br>19<br>21 | 0.9<br>30<br>85<br>92<br>11 |
| 81<br>60<br>7 | PVR<br>L4  | Poliovirus<br>receptor-related 4               | 7.<br>00<br>24      | 7.<br>21<br>18      | 7.<br>40<br>76<br>9 | 8.<br>00<br>31<br>7 | 7.<br>73<br>06<br>7 | 7.<br>67<br>47<br>1 | 1.5<br>110<br>520<br>26  | 0.5<br>955<br>533<br>33  | 1.5<br>11<br>05<br>20<br>26 | U<br>p           | 0.0<br>08<br>56<br>15<br>07 | 0.9<br>30<br>85<br>92<br>11 |
| 85<br>7       | CAV<br>1   | Caveolin 1                                     | 8.<br>02<br>64<br>6 | 9.<br>05<br>34<br>9 | 9.<br>03<br>89<br>5 | 6.<br>44<br>52<br>2 | 8.<br>11<br>23<br>6 | 7.<br>74<br>81<br>6 | -2.<br>413<br>377<br>055 | -1.<br>271<br>053<br>333 | 2.4<br>13<br>37<br>70<br>55 | D<br>o<br>w<br>n | 0.0<br>25<br>50<br>42<br>43 | 0.9<br>30<br>85<br>92<br>11 |
| 66            | SNA        | Small nuclear RNA                              | 4.                  | 4.                  | 4.                  | 4.                  | 3.                  | 4.                  | -1.                      | -0.                      | 1.5                         | D                | 0.0                         | 0.9                         |

|                |            |                                                                      |                     |                     |                      |                     |                     |                      |                          |                              |                             |                  |                             |                             |
|----------------|------------|----------------------------------------------------------------------|---------------------|---------------------|----------------------|---------------------|---------------------|----------------------|--------------------------|------------------------------|-----------------------------|------------------|-----------------------------|-----------------------------|
| 19             | PC3        | activating complex polypeptide 3                                     | 39<br>96<br>2       | 55<br>72<br>2       | 89<br>46<br>2        | 26<br>45<br>8       | 77<br>66<br>9       | 00<br>31<br>2        | 518<br>194<br>538        | 602<br>356<br>667            | 18<br>19<br>45<br>38        | o<br>w<br>n      | 11<br>41<br>19<br>23        | 30<br>85<br>92<br>11        |
| 60<br>04       | RGS<br>16  | Regulator of G-protein signaling 16                                  | 5.<br>54<br>36<br>8 | 6.<br>53<br>11<br>2 | 5.<br>59<br>29       | 4.<br>83<br>76<br>8 | 5.<br>01<br>41<br>8 | 4.<br>98<br>05<br>3  | -1.<br>925<br>326<br>783 | -0.<br>945<br>103<br>333     | 1.9<br>25<br>32<br>67<br>83 | D<br>o<br>w<br>n | 0.0<br>08<br>28<br>83<br>56 | 0.9<br>30<br>85<br>92<br>11 |
| 93<br>58       | ITG<br>BL1 | Integrin $\beta$ like 1                                              | 5.<br>38<br>66<br>7 | 5.<br>86<br>96<br>1 | 5.<br>08<br>43<br>4  | 6.<br>12<br>08<br>8 | 7.<br>71<br>02<br>1 | 5.<br>89<br>92<br>37 | 2.1<br>884<br>205<br>37  | 1.1<br>298<br>9<br>37        | 2.1<br>88<br>42<br>05<br>37 | U<br>p           | 0.0<br>42<br>29<br>58<br>35 | 0.9<br>30<br>85<br>92<br>11 |
| 51<br>38<br>6  | EIF3<br>L  | Eukaryotic translation initiation factor 3 subunit L                 | 8.<br>79<br>09<br>7 | 9.<br>18<br>76<br>8 | 9.<br>68<br>02<br>7  | 8.<br>27<br>23<br>7 | 7.<br>86<br>76<br>9 | 8.<br>62<br>92<br>8  | -1.<br>949<br>620<br>51  | -0.<br>963<br>193<br>333     | 1.9<br>49<br>62<br>05<br>1  | D<br>o<br>w<br>n | 0.0<br>08<br>40<br>12<br>8  | 0.9<br>30<br>85<br>92<br>11 |
| 72<br>79<br>56 | SDH<br>AP2 | Succinate dehydrogenase complex subunit A, flavoprotein pseudogene 2 | 9.<br>64<br>26<br>8 | 9.<br>91<br>69<br>4 | 10<br>.0<br>53<br>34 | 9.<br>48<br>21<br>6 | 9.<br>02<br>82<br>7 | 9.<br>14<br>54<br>5  | -1.<br>571<br>737<br>185 | -0.<br>652<br>36<br>71<br>85 | 1.5<br>71<br>73<br>71<br>85 | D<br>o<br>w<br>n | 0.0<br>06<br>23<br>94<br>1  | 0.9<br>30<br>85<br>92<br>11 |
| 22<br>52       | FGF<br>7   | Fibroblast growth factor 7                                           | 6.<br>71<br>67<br>3 | 7.<br>03<br>45<br>8 | 7.<br>78<br>47<br>8  | 3.<br>64<br>22<br>5 | 7.<br>01<br>75<br>4 | 5.<br>13<br>42<br>2  | -3.<br>768<br>525<br>096 | -1.<br>914<br>525<br>096     | 3.7<br>68<br>52<br>50<br>96 | D<br>o<br>w<br>n | 0.0<br>36<br>44<br>23<br>82 | 0.9<br>30<br>85<br>92<br>11 |

|               |            |                                                 |                     |                     |                     |                      |                      |                      |                          |                             |                             |                  |                             |                             |
|---------------|------------|-------------------------------------------------|---------------------|---------------------|---------------------|----------------------|----------------------|----------------------|--------------------------|-----------------------------|-----------------------------|------------------|-----------------------------|-----------------------------|
| 10<br>63<br>1 | POS<br>TN  | Periostin,<br>osteoblast specific<br>factor     | 4.<br>99<br>23<br>1 | 5.<br>14<br>36<br>9 | 4.<br>89<br>14<br>6 | 3.<br>91<br>17<br>6  | 4.<br>03<br>27<br>3  | 4.<br>47<br>03<br>7  | -1.<br>828<br>735<br>806 | -0.<br>870<br>846<br>667    | 1.8<br>28<br>73<br>58<br>06 | D<br>o<br>w<br>n | 0.0<br>01<br>23<br>24<br>21 | 0.9<br>30<br>85<br>92<br>11 |
| 71<br>36      | TNN<br>I2  | Troponin I type 2<br>(skeletal, fast)           | 9.<br>37<br>26<br>7 | 8.<br>80<br>62<br>6 | 8.<br>72<br>66<br>3 | 10<br>.4<br>62<br>82 | 10<br>.4<br>67<br>36 | 9.<br>38<br>01<br>7  | 2.1<br>960<br>790<br>71  | 1.1<br>349<br>3<br>90<br>71 | 2.1<br>96<br>07<br>90<br>71 | U<br>p           | 0.0<br>08<br>39<br>96<br>32 | 0.9<br>30<br>85<br>92<br>11 |
| 62<br>75      | S100<br>A4 | S100 calcium<br>binding protein A4              | 9.<br>67<br>65<br>9 | 9.<br>93<br>60<br>1 | 9.<br>31<br>38<br>4 | 9.<br>75<br>74<br>3  | 10<br>.4<br>76<br>57 | 10<br>.5<br>95<br>14 | 1.5<br>521<br>127<br>18  | 0.6<br>342<br>333<br>33     | 1.5<br>52<br>11<br>27<br>18 | U<br>p           | 0.0<br>39<br>59<br>32<br>63 | 0.9<br>30<br>85<br>92<br>11 |
| 51<br>32<br>6 | ARL<br>17A | ADP-ribosylation<br>factor like gtpase<br>17A   | 4.<br>80<br>13<br>1 | 4.<br>51<br>23<br>2 | 4.<br>51<br>53<br>1 | 3.<br>79<br>43<br>6  | 3.<br>57<br>36<br>5  | 4.<br>46<br>30<br>7  | -1.<br>586<br>616<br>363 | -0.<br>665<br>953<br>333    | 1.5<br>86<br>61<br>63<br>63 | D<br>o<br>w<br>n | 0.0<br>21<br>74<br>66<br>41 | 0.9<br>30<br>85<br>92<br>11 |
| 10<br>10<br>5 | PPIF       | Peptidylprolyl<br>isomerase F                   | 6.<br>06<br>35<br>9 | 6.<br>20<br>70<br>4 | 6.<br>66<br>77<br>9 | 5.<br>90<br>23<br>1  | 5.<br>68<br>54<br>8  | 5.<br>44<br>75<br>9  | -1.<br>552<br>234<br>652 | -0.<br>634<br>346<br>667    | 1.5<br>52<br>23<br>46<br>52 | D<br>o<br>w<br>n | 0.0<br>16<br>78<br>60<br>59 | 0.9<br>30<br>85<br>92<br>11 |
| 84<br>06      | SRP<br>X   | Sushi-repeat<br>containing protein,<br>X-linked | 7.<br>00<br>44<br>3 | 8.<br>30<br>52<br>5 | 8.<br>57<br>88<br>6 | 5.<br>89<br>90<br>5  | 7.<br>34<br>62<br>4  | 7.<br>03<br>64<br>7  | -2.<br>300<br>998<br>431 | -1.<br>202<br>26<br>84      | 2.3<br>00<br>99<br>84       | D<br>o<br>w<br>n | 0.0<br>41<br>75<br>79       | 0.9<br>30<br>85<br>92       |

|    |      |                         |    |    |    |    |    |    |      |     |     |     |     |     |     |
|----|------|-------------------------|----|----|----|----|----|----|------|-----|-----|-----|-----|-----|-----|
|    |      |                         |    |    |    |    |    |    |      |     |     | 31  |     | 53  | 11  |
| 71 | TNF  | TNF $\alpha$ induced    | 5. | 4. | 4. | 5. | 5. | 5. | 5.   | 1.6 | 0.6 | 1.6 | U   | 0.0 | 0.9 |
| 27 | AIP2 | protein 2               | 11 | 94 | 53 | 52 | 94 | 21 | 193  | 954 | 19  | p   | 17  | 30  |     |
|    |      |                         | 37 | 76 | 96 | 83 | 17 | 73 | 932  | 533 | 39  |     | 82  | 85  |     |
|    |      |                         | 2  |    | 5  |    | 3  |    | 1    | 33  | 32  |     | 76  | 92  |     |
|    |      |                         |    |    |    |    |    |    |      |     | 1   |     | 87  | 11  |     |
| 44 | MT1  | Metallothionein 1J,     | 6. | 6. | 5. | 7. | 7. | 7. | 2.0  | 1.0 | 2.0 | U   | 0.0 | 0.9 |     |
| 98 | JP   | pseudogene              | 88 | 34 | 75 | 59 | 27 | 30 | 933  | 657 | 93  | p   | 05  | 30  |     |
|    |      |                         | 56 | 36 | 38 | 9  | 87 | 27 | 013  | 8   | 30  |     | 70  | 85  |     |
|    |      |                         | 6  | 9  | 1  |    | 3  | 7  | 27   |     | 13  |     | 41  | 92  |     |
|    |      |                         |    |    |    |    |    |    |      |     | 27  |     | 4   | 11  |     |
| 43 | MM   | Matrix                  | 10 | 9. | 10 | 11 | 10 | 10 | 1.7  | 0.8 | 1.7 | U   | 0.0 | 0.9 |     |
| 12 | P1   | metallopeptidase 1      | .4 | 20 | .7 | .1 | .8 | .9 | 935  | 427 | 93  | p   | 48  | 30  |     |
|    |      |                         | 36 | 65 | 03 | 66 | 07 | 00 | 110  | 866 | 51  |     | 53  | 85  |     |
|    |      |                         | 78 | 3  | 03 | 61 | 26 | 83 | 91   | 67  | 10  |     | 65  | 92  |     |
|    |      |                         |    |    |    |    |    |    |      |     | 91  |     | 14  | 11  |     |
| 35 | IGK  | Immunoglobulin $\kappa$ | 4. | 5. | 5. | 4. | 4. | 4. | -2.1 | -1. | 2.1 | D   | 0.0 | 0.9 |     |
| 14 | C    | constant                | 84 | 68 | 56 | 43 | 01 | 39 | 180  | 082 | 18  | o   | 02  | 30  |     |
|    |      |                         | 29 | 69 | 01 | 06 | 58 | 53 | 304  | 723 | 03  | w   | 39  | 85  |     |
|    |      |                         | 2  | 1  | 6  | 2  | 8  | 2  | 54   | 333 | 04  | n   | 96  | 92  |     |
|    |      |                         |    |    |    |    |    |    |      |     | 54  |     | 6   | 11  |     |
| 25 | GAP  | Glyceraldehyde-3-       | 12 | 11 | 12 | 11 | 11 | 11 | -1.  | -0. | 1.5 | D   | 0.0 | 0.9 |     |
| 97 | DH   | phosphate               | .1 | .8 | .1 | .3 | .2 | .6 | 529  | 612 | 29  | o   | 03  | 30  |     |
|    |      | dehydrogenase           | 12 | 61 | 71 | 52 | 69 | 85 | 199  | 776 | 19  | w   | 96  | 85  |     |
|    |      |                         | 78 | 74 | 12 | 74 | 05 | 52 | 535  | 667 | 95  | n   | 21  | 92  |     |
|    |      |                         |    |    |    |    |    |    |      |     | 35  |     | 29  | 11  |     |
| 46 | NAP  | Nucleosome              | 3. | 4. | 5. | 3. | 3. | 3. | -1.  | -0. | 1.7 | D   | 0.0 | 0.9 |     |
| 75 | 1L3  | assembly protein        | 75 | 52 | 10 | 30 | 97 | 62 | 769  | 823 | 69  | o   | 39  | 30  |     |
|    |      | 1-like 3                | 00 | 16 | 54 | 77 | 33 | 7  | 093  | 01  | 09  | w   | 90  | 85  |     |

|    |      |                      |    |    |    |    |    |    |     |     |     |   |     |     |
|----|------|----------------------|----|----|----|----|----|----|-----|-----|-----|---|-----|-----|
|    |      |                      | 9  | 2  | 2  | 2  | 8  |    | 133 |     | 31  | n | 47  | 92  |
|    |      |                      |    |    |    |    |    |    |     |     | 33  |   | 26  | 11  |
| 28 | GPM  | Glycoprotein M6A     | 4. | 6. | 7. | 2. | 5. | 3. | -4. | -2. | 4.0 | D | 0.0 | 0.9 |
| 23 | 6A   |                      | 75 | 75 | 13 | 87 | 68 | 98 | 092 | 033 | 92  | o | 37  | 30  |
|    |      |                      | 03 | 74 | 38 | 68 | 02 | 53 | 786 | 083 | 78  | w | 29  | 85  |
|    |      |                      | 2  | 6  | 8  | 1  | 8  | 2  | 281 | 333 | 62  | n | 38  | 92  |
|    |      |                      |    |    |    |    |    |    |     |     | 81  |   | 14  | 11  |
| 10 | EDIL | EGF-like repeats     | 8. | 8. | 9. | 6. | 8. | 6. | -2. | -1. | 2.8 | D | 0.0 | 0.9 |
| 08 | 3    | and discoidin I-like | 04 | 75 | 10 | 80 | 42 | 15 | 840 | 506 | 40  | o | 27  | 30  |
| 5  |      | domains 3            | 56 | 17 | 24 | 21 | 90 | 01 | 536 | 163 | 53  | w | 66  | 85  |
|    |      |                      | 8  | 7  | 4  | 6  | 6  | 8  | 287 | 333 | 62  | n | 24  | 92  |
|    |      |                      |    |    |    |    |    |    |     |     | 87  |   | 37  | 11  |
| 26 | RAL  | Ral gtpase           | 4. | 4. | 4. | 4. | 3. | 3. | -1. | -0. | 1.6 | D | 0.0 | 0.9 |
| 13 | GAP  | activating protein,  | 20 | 95 | 66 | 20 | 37 | 96 | 691 | 758 | 91  | o | 20  | 30  |
| 4  | A1P  | $\alpha$ subunit 1   | 14 | 49 | 12 | 16 | 79 | 37 | 246 | 086 | 24  | w | 59  | 85  |
|    |      | (catalytic)          | 2  | 8  | 9  | 8  | 6  | 9  | 17  | 667 | 61  | n | 73  | 92  |
|    |      | pseudogene           |    |    |    |    |    |    |     |     | 7   |   | 06  | 11  |
| 10 | LOC  | WAS protein          | 7. | 7. | 7. | 8. | 8. | 8. | 2.0 | 1.0 | 2.0 | U | 0.0 | 0.9 |
| 02 | 1002 | family homolog 1     | 80 | 50 | 00 | 94 | 50 | 07 | 975 | 686 | 97  | p | 05  | 30  |
| 88 | 8877 | pseudogene           | 77 | 08 | 97 | 64 | 34 | 44 | 327 | 933 | 53  |   | 38  | 85  |
| 77 | 8    |                      | 1  | 5  | 2  | 6  | 6  | 4  | 45  | 33  | 27  |   | 14  | 92  |
| 8  |      |                      |    |    |    |    |    |    |     |     | 45  |   | 06  | 11  |
| 10 | FXY  | FXYD6-FXYD2          | 6. | 7. | 7. | 4. | 6. | 5. | -2. | -1. | 2.7 | D | 0.0 | 0.9 |
| 05 | D6-F | readthrough          | 34 | 23 | 97 | 41 | 85 | 85 | 780 | 475 | 80  | o | 48  | 30  |
| 33 | XYD  |                      | 29 | 23 | 33 | 66 | 59 | 01 | 401 | 293 | 40  | w | 83  | 85  |
| 18 | 2    |                      | 3  | 7  | 2  | 9  | 2  | 3  | 702 | 333 | 17  | n | 12  | 92  |
| 1  |      |                      |    |    |    |    |    |    |     |     | 02  |   | 46  | 11  |
| 65 | SLC  | Solute carrier       | 9. | 8. | 9. | 10 | 9. | 9. | 1.5 | 0.6 | 1.5 | U | 0.0 | 0.9 |
| 13 | 2A1  | family 2             | 08 | 89 | 07 | .2 | 48 | 17 | 303 | 138 | 30  | p | 46  | 30  |

|               |                  |                                                                    |                      |                     |                     |                     |                      |                     |                          |                          |                             |                  |                             |                             |
|---------------|------------------|--------------------------------------------------------------------|----------------------|---------------------|---------------------|---------------------|----------------------|---------------------|--------------------------|--------------------------|-----------------------------|------------------|-----------------------------|-----------------------------|
|               |                  | (facilitated glucose transporter), member 1                        | 42<br>6              | 05<br>5             | 73                  | 30<br>69            | 62<br>6              | 67<br>1             | 376<br>49                | 5                        | 33<br>76<br>49              |                  | 58<br>23<br>73              | 85<br>92<br>11              |
| 50<br>48      | PAF<br>AH1<br>B1 | Platelet activating factor acetylhydrolase 1b regulatory subunit 1 | 4.<br>38<br>83<br>5  | 5.<br>13<br>07<br>9 | 5.<br>52<br>52      | 4.<br>66<br>16<br>2 | 3.<br>93<br>01<br>2  | 4.<br>29<br>54<br>6 | -1.<br>646<br>093<br>936 | -0.<br>719<br>046<br>667 | 1.6<br>46<br>09<br>39<br>36 | D<br>o<br>w<br>n | 0.0<br>49<br>15<br>17<br>58 | 0.9<br>30<br>85<br>92<br>11 |
| 73<br>64      | UGT<br>2B7       | UDP glucuronosyltransferase 2 family, polypeptide B7               | 5.<br>94<br>60<br>9  | 6.<br>55<br>34<br>3 | 8.<br>66<br>62      | 9.<br>20<br>94<br>4 | 10<br>.1<br>88<br>3  | 7.<br>71<br>49<br>2 | 3.9<br>512<br>615<br>12  | 1.9<br>823<br>133<br>33  | 3.9<br>51<br>26<br>15<br>12 | U<br>p           | 0.0<br>40<br>16<br>58<br>38 | 0.9<br>30<br>85<br>92<br>11 |
| 10<br>04<br>9 | DNA<br>JB6       | Dnaj heat shock protein family (Hsp40) member B6                   | 5.<br>56<br>35       | 6.<br>14<br>44<br>9 | 6.<br>90<br>13      | 5.<br>50<br>69<br>5 | 4.<br>98<br>48<br>8  | 5.<br>34<br>71<br>2 | -1.<br>896<br>645<br>432 | -0.<br>923<br>45         | 1.8<br>96<br>64<br>54<br>32 | D<br>o<br>w<br>n | 0.0<br>23<br>87<br>07<br>09 | 0.9<br>30<br>85<br>92<br>11 |
| 68<br>76      | TAG<br>LN        | Transgelin                                                         | 10<br>.6<br>10<br>81 | 11<br>.3<br>27<br>5 | 11<br>.5<br>60<br>5 | 7.<br>74<br>80<br>5 | 11<br>.3<br>54<br>78 | 8.<br>65<br>89<br>8 | -3.<br>763<br>739<br>209 | -1.<br>912<br>166<br>667 | 3.7<br>63<br>73<br>92<br>09 | D<br>o<br>w<br>n | 0.0<br>49<br>38<br>04<br>31 | 0.9<br>30<br>85<br>92<br>11 |
| 90<br>79      | LDB<br>2         | LIM domain binding 2                                               | 4.<br>54<br>17<br>4  | 5.<br>01<br>24<br>8 | 5.<br>17<br>61<br>3 | 3.<br>97<br>62<br>6 | 3.<br>81<br>58<br>9  | 4.<br>74<br>76<br>1 | -1.<br>658<br>865<br>211 | -0.<br>730<br>196<br>667 | 1.6<br>58<br>86<br>52<br>11 | D<br>o<br>w<br>n | 0.0<br>29<br>65<br>99<br>48 | 0.9<br>30<br>85<br>92<br>11 |
| 35            | JCH              | Joining chain of                                                   | 7.                   | 7.                  | 7.                  | 7.                  | 7.                   | 6.                  | -1.                      | -0.                      | 1.5                         | D                | 0.0                         | 0.9                         |



|               |             |                                                                                    |                     |                      |                     |                     |                     |                     |                          |                          |                             |                  |                             |                             |
|---------------|-------------|------------------------------------------------------------------------------------|---------------------|----------------------|---------------------|---------------------|---------------------|---------------------|--------------------------|--------------------------|-----------------------------|------------------|-----------------------------|-----------------------------|
| 12            | AIN         | multimeric iga and<br>igm                                                          | 17<br>37<br>8       | 83<br>73<br>1        | 80<br>76<br>6       | 01<br>91<br>9       | 11<br>55<br>2       | 92<br>23<br>6       | 502<br>355<br>949        | 587<br>226<br>667        | 02<br>35<br>59<br>49        | o<br>w<br>n      | 22<br>74<br>34<br>09        | 30<br>85<br>92<br>11        |
| 13<br>06      | COL<br>15A1 | Collagen, type XV,<br>$\alpha$ 1                                                   | 7.<br>29<br>63<br>4 | 8.<br>11<br>17<br>7  | 8.<br>21<br>13<br>1 | 5.<br>95<br>84<br>5 | 7.<br>44<br>28<br>1 | 7.<br>23<br>57<br>2 | -1.<br>991<br>901<br>996 | -0.<br>994<br>146<br>667 | 1.9<br>91<br>90<br>19<br>96 | D<br>o<br>w<br>n | 0.0<br>45<br>64<br>23<br>42 | 0.9<br>30<br>85<br>92<br>11 |
| 33<br>97      | ID1         | Inhibitor of DNA<br>binding 1,<br>dominant negative<br>helix-loop-helix<br>protein | 9.<br>00<br>30<br>9 | 10<br>.7<br>40<br>28 | 9.<br>37<br>94<br>9 | 8.<br>65<br>61<br>9 | 7.<br>06<br>94<br>4 | 7.<br>22<br>70<br>9 | -4.<br>160<br>287<br>797 | -2.<br>056<br>683<br>333 | 4.1<br>60<br>28<br>77<br>97 | D<br>o<br>w<br>n | 0.0<br>05<br>82<br>32<br>87 | 0.9<br>30<br>85<br>92<br>11 |
| 60<br>95      | ROR<br>A    | RAR-related<br>orphan receptor A                                                   | 7.<br>29<br>36<br>4 | 6.<br>94<br>18<br>1  | 6.<br>17<br>26<br>7 | 7.<br>67<br>37<br>8 | 7.<br>45<br>88<br>8 | 7.<br>53<br>85<br>2 | 1.6<br>868<br>441<br>26  | 0.7<br>543<br>266<br>67  | 1.6<br>86<br>84<br>41<br>26 | U<br>p           | 0.0<br>26<br>89<br>57<br>54 | 0.9<br>30<br>85<br>92<br>11 |
| 35<br>97      | IL13<br>RA1 | Interleukin 13<br>receptor, $\alpha$ 1                                             | 5.<br>34<br>64<br>3 | 5.<br>39<br>40<br>4  | 5.<br>58<br>65<br>3 | 4.<br>79<br>14<br>7 | 4.<br>51<br>11<br>6 | 5.<br>22<br>39<br>6 | -1.<br>515<br>881<br>172 | -0.<br>600<br>156<br>667 | 1.5<br>15<br>88<br>11<br>72 | D<br>o<br>w<br>n | 0.0<br>18<br>21<br>72<br>66 | 0.9<br>30<br>85<br>92<br>11 |
| 57<br>18<br>7 | THO<br>C2   | THO complex 2                                                                      | 7.<br>18<br>99<br>7 | 6.<br>88<br>07<br>9  | 6.<br>30<br>22<br>6 | 7.<br>61<br>67<br>5 | 7.<br>54<br>63<br>2 | 7.<br>28<br>08<br>2 | 1.6<br>136<br>003<br>85  | 0.6<br>902<br>833<br>33  | 1.6<br>13<br>60<br>03<br>85 | U<br>p           | 0.0<br>21<br>72<br>24<br>8  | 0.9<br>30<br>85<br>92<br>11 |

|    |      |                          |    |    |    |    |    |    |     |      |     |   |     |     |
|----|------|--------------------------|----|----|----|----|----|----|-----|------|-----|---|-----|-----|
| 58 | RAB  | RAB6A, member            | 6. | 6. | 6. | 5. | 5. | 5. | -1. | -0.  | 1.5 | D | 0.0 | 0.9 |
| 70 | 6A   | RAS oncogene             | 03 | 01 | 26 | 55 | 07 | 76 | 558 | 64   | 58  | o | 15  | 30  |
|    |      | family                   | 78 | 41 | 91 | 74 | 60 | 75 | 329 |      | 32  | w | 03  | 85  |
|    |      |                          | 9  |    |    | 6  | 7  | 6  | 159 |      | 91  | n | 14  | 92  |
|    |      |                          |    |    |    |    |    |    |     |      | 59  |   | 2   | 11  |
| 10 | NPIP | Nuclear pore             | 5. | 5. | 6. | 4. | 4. | 5. | -1. | -0.  | 1.8 | D | 0.0 | 0.9 |
| 10 | A8   | complex                  | 15 | 57 | 33 | 89 | 32 | 20 | 841 | 881  | 41  | o | 31  | 30  |
| 59 |      | interacting protein      | 31 | 97 | 36 | 51 | 09 | 72 | 706 | 043  | 70  | w | 97  | 85  |
| 95 |      | family member A8         |    | 5  |    | 7  |    | 5  | 712 | 333  | 67  | n | 36  | 92  |
| 3  |      |                          |    |    |    |    |    |    |     |      | 12  |   | 18  | 11  |
| 87 | CTN  | Catenin $\alpha$ -like 1 | 6. | 7. | 7. | 5. | 5. | 6. | -2. | -1.1 | 2.1 | D | 0.0 | 0.9 |
| 27 | NAL  |                          | 62 | 18 | 62 | 93 | 74 | 43 | 158 | 103  | 58  | o | 05  | 30  |
|    | 1    |                          | 98 | 41 | 41 | 11 | 46 | 13 | 990 | 566  | 99  | w | 24  | 85  |
|    |      |                          | 2  | 6  | 6  | 1  | 5  | 1  | 158 | 67   | 01  | n | 23  | 92  |
|    |      |                          |    |    |    |    |    |    |     |      | 58  |   | 42  | 11  |
| 99 | HNR  | Heterogeneous            | 7. | 8. | 8. | 7. | 6. | 7. | -1. | -0.  | 1.7 | D | 0.0 | 0.9 |
| 87 | NPD  | nuclear                  | 29 | 06 | 17 | 15 | 48 | 48 | 742 | 801  | 42  | o | 37  | 30  |
|    | L    | ribonucleoprotein        | 79 | 44 | 29 | 91 | 49 | 72 | 739 | 356  | 73  | w | 66  | 85  |
|    |      | D like                   | 8  | 3  | 6  | 1  |    | 9  | 175 | 667  | 91  | n | 89  | 92  |
|    |      |                          |    |    |    |    |    |    |     |      | 75  |   | 82  | 11  |
| 55 | EPN  | Epsin 3                  | 5. | 5. | 5. | 6. | 5. | 6. | 1.5 | 0.6  | 1.5 | U | 0.0 | 0.9 |
| 04 | 3    |                          | 75 | 66 | 70 | 92 | 97 | 14 | 603 | 418  | 60  | p | 34  | 30  |
| 0  |      |                          | 65 | 26 | 65 | 95 | 57 | 62 | 755 | 933  | 37  |   | 60  | 85  |
|    |      |                          | 8  | 9  | 6  | 9  |    | 2  | 89  | 33   | 55  |   | 72  | 92  |
|    |      |                          |    |    |    |    |    |    |     |      | 89  |   | 29  | 11  |
| 53 | PLN  | Phospholamban            | 5. | 7. | 7. | 3. | 6. | 3. | -3. | -1.  | 3.9 | D | 0.0 | 0.9 |
| 50 |      |                          | 52 | 28 | 34 | 67 | 61 | 92 | 947 | 980  | 47  | o | 42  | 30  |
|    |      |                          | 60 | 76 | 41 | 54 | 11 | 89 | 073 | 783  | 07  | w | 98  | 85  |
|    |      |                          | 9  | 8  | 1  | 2  | 4  | 7  | 36  | 333  | 33  | n | 06  | 92  |

|    |      |                                   |    |    |    |    |    |    |     |     |     |   |     |     |
|----|------|-----------------------------------|----|----|----|----|----|----|-----|-----|-----|---|-----|-----|
|    |      |                                   |    |    |    |    |    |    |     |     | 6   |   | 24  | 11  |
| 64 | ST6  | ST6                               | 5. | 6. | 6. | 5. | 5. | 6. | -1. | -0. | 1.7 | D | 0.0 | 0.9 |
| 80 | GAL  | $\beta$ -galactosamide            | 87 | 58 | 91 | 38 | 32 | 25 | 746 | 804 | 46  | o | 45  | 30  |
|    | 1    | $\alpha$ -2,6-sialyltransferase 1 | 6  | 32 | 92 | 52 | 27 | 60 | 935 | 826 | 93  | w | 92  | 85  |
|    |      |                                   |    | 8  | 5  | 8  | 1  | 6  | 893 | 667 | 58  | n | 14  | 92  |
|    |      |                                   |    |    |    |    |    |    |     |     | 93  |   | 55  | 11  |
| 51 | MPP  | Membrane protein,                 | 8. | 8. | 7. | 7. | 7. | 7. | -1. | -0. | 1.5 | D | 0.0 | 0.9 |
| 67 | 6    | palmitoylated 6                   | 17 | 03 | 97 | 08 | 52 | 73 | 531 | 614 | 31  | o | 13  | 30  |
| 8  |      |                                   | 29 | 41 | 95 | 04 | 87 | 26 | 536 | 98  | 53  | w | 55  | 85  |
|    |      |                                   | 7  | 7  | 9  | 2  |    | 7  | 765 |     | 67  | n | 34  | 92  |
|    |      |                                   |    |    |    |    |    |    |     |     | 65  |   | 94  | 11  |
| 88 | TSC  | TSC22 domain                      | 7. | 8. | 8. | 7. | 6. | 7. | -1. | -0. | 1.7 | D | 0.0 | 0.9 |
| 48 | 22D1 | family member 1                   | 41 | 03 | 18 | 04 | 73 | 32 | 791 | 841 | 91  | o | 09  | 30  |
|    |      |                                   | 15 | 07 | 91 | 7  | 66 | 38 | 696 | 326 | 69  | w | 92  | 85  |
|    |      |                                   | 9  | 2  | 4  |    | 6  | 1  | 985 | 667 | 69  | n | 62  | 92  |
|    |      |                                   |    |    |    |    |    |    |     |     | 85  |   | 43  | 11  |
| 27 | PDC  | Programmed cell                   | 6. | 7. | 7. | 6. | 5. | 6. | -1. | -0. | 1.7 | D | 0.0 | 0.9 |
| 25 | D4   | death 4 (neoplastic               | 73 | 33 | 03 | 66 | 71 | 40 | 708 | 772 | 08  | o | 23  | 30  |
| 0  |      | transformation                    | 87 | 17 | 23 | 80 | 68 | 02 | 329 | 586 | 32  | w | 23  | 85  |
|    |      | inhibitor)                        | 3  | 3  | 8  | 3  | 1  | 4  | 974 | 667 | 99  | n | 18  | 92  |
|    |      |                                   |    |    |    |    |    |    |     |     | 74  |   | 91  | 11  |
| 19 | ACS  | Acyl-coa                          | 6. | 7. | 7. | 7. | 8. | 7. | 1.8 | 0.8 | 1.8 | U | 0.0 | 0.9 |
| 73 | F3   | synthetase family                 | 54 | 70 | 04 | 95 | 15 | 83 | 492 | 869 | 49  | p | 14  | 30  |
| 22 |      | member 3                          | 17 | 11 | 72 | 37 | 79 | 93 | 667 | 533 | 26  |   | 70  | 85  |
|    |      |                                   | 7  | 2  | 8  | 5  | 3  | 5  | 37  | 33  | 67  |   | 41  | 92  |
|    |      |                                   |    |    |    |    |    |    |     |     | 37  |   | 02  | 11  |
| 64 | NPIP | Nuclear pore                      | 5. | 5. | 6. | 4. | 4. | 5. | -1. | -0. | 1.8 | D | 0.0 | 0.9 |
| 27 | A3   | complex                           | 15 | 57 | 33 | 89 | 32 | 20 | 841 | 881 | 41  | o | 31  | 30  |
| 78 |      | interacting protein               | 31 | 97 | 36 | 51 | 09 | 72 | 706 | 043 | 70  | w | 97  | 85  |

|    |      |                    |    |    |    |    |    |    |     |     |     |   |     |     |
|----|------|--------------------|----|----|----|----|----|----|-----|-----|-----|---|-----|-----|
|    |      | family member A3   |    | 5  |    | 7  |    | 5  | 712 | 333 | 67  | n | 36  | 92  |
|    |      |                    |    |    |    |    |    |    |     |     | 12  |   | 18  | 11  |
| 74 | WAR  | Tryptophanyl-trna  | 4. | 4. | 5. | 4. | 4. | 4. | -1. | -0. | 1.6 | D | 0.0 | 0.9 |
| 53 | S    | synthetase         | 68 | 72 | 48 | 02 | 03 | 56 | 691 | 758 | 91  | o | 18  | 30  |
|    |      |                    | 48 | 73 | 59 | 36 | 23 | 68 | 582 | 373 | 58  | w | 81  | 85  |
|    |      |                    | 8  |    |    | 9  | 9  | 8  | 257 | 333 | 22  | n | 36  | 92  |
|    |      |                    |    |    |    |    |    |    |     |     | 57  |   | 5   | 11  |
| 48 | NN   | Nicotinamide       | 6. | 6. | 7. | 7. | 8. | 7. | 2.2 | 1.1 | 2.2 | U | 0.0 | 0.9 |
| 37 | MT   | N-methyltransferas | 61 | 91 | 03 | 75 | 69 | 70 | 918 | 965 | 91  | p | 03  | 30  |
|    |      | e                  | 20 | 25 | 56 | 32 | 20 | 45 | 987 | 433 | 89  |   | 07  | 85  |
|    |      |                    | 7  | 2  |    | 2  | 7  | 3  | 85  | 33  | 87  |   | 65  | 92  |
|    |      |                    |    |    |    |    |    |    |     |     | 85  |   | 75  | 11  |
| 10 | GPC  | Glypican 6         | 8. | 8. | 8. | 7. | 7. | 7. | -1. | -0. | 1.6 | D | 0.0 | 0.9 |
| 08 | 6    |                    | 16 | 27 | 83 | 77 | 86 | 52 | 630 | 705 | 30  | o | 10  | 30  |
| 2  |      |                    | 53 | 72 | 89 | 42 | 87 | 34 | 223 | 07  | 22  | w | 51  | 85  |
|    |      |                    | 4  | 8  | 7  | 5  |    | 3  | 762 |     | 37  | n | 52  | 92  |
|    |      |                    |    |    |    |    |    |    |     |     | 62  |   | 22  | 11  |
| 79 | WLS  | Wntless Wnt ligand | 6. | 7. | 7. | 6. | 5. | 6. | -1. | -0. | 1.7 | D | 0.0 | 0.9 |
| 97 |      | secretion mediator | 43 | 11 | 37 | 48 | 73 | 28 | 758 | 813 | 58  | o | 24  | 30  |
| 1  |      |                    | 98 | 80 | 76 | 11 | 13 | 11 | 014 | 946 | 01  | w | 29  | 85  |
|    |      |                    | 7  | 8  | 1  | 7  | 9  | 6  | 131 | 667 | 41  | n | 57  | 92  |
|    |      |                    |    |    |    |    |    |    |     |     | 31  |   | 8   | 11  |
| 59 | RB1  | Retinoblastoma 1   | 4. | 4. | 5. | 4. | 3. | 4. | -1. | -0. | 1.6 | D | 0.0 | 0.9 |
| 25 |      |                    | 63 | 65 | 43 | 35 | 95 | 13 | 692 | 758 | 92  | o | 13  | 30  |
|    |      |                    | 07 | 55 | 94 | 97 | 26 | 64 | 266 | 956 | 26  | w | 67  | 85  |
|    |      |                    | 3  | 7  | 7  | 8  | 5  | 7  | 363 | 667 | 63  | n | 23  | 92  |
|    |      |                    |    |    |    |    |    |    |     |     | 63  |   | 74  | 11  |
| 94 | LY86 | Lymphocyte         | 6. | 6. | 6. | 5. | 6. | 6. | -1. | -0. | 1.6 | D | 0.0 | 0.9 |
| 50 |      | antigen 86         | 53 | 63 | 99 | 59 | 02 | 50 | 603 | 680 | 03  | o | 28  | 30  |

|    |     |                     |    |    |    |    |    |    |     |     |     |   |     |     |
|----|-----|---------------------|----|----|----|----|----|----|-----|-----|-----|---|-----|-----|
|    |     |                     | 37 | 77 | 11 | 29 | 08 | 60 | 176 | 933 | 17  | w | 30  | 85  |
|    |     |                     | 5  | 7  | 5  | 6  | 4  | 7  | 575 | 333 | 65  | n | 34  | 92  |
|    |     |                     |    |    |    |    |    |    |     |     | 75  |   | 05  | 11  |
| 54 | POD | Podocalyxin-like    | 7. | 6. | 7. | 6. | 6. | 6. | -1. | -0. | 1.5 | D | 0.0 | 0.9 |
| 20 | XL  |                     | 00 | 86 | 48 | 05 | 39 | 95 | 574 | 654 | 74  | o | 41  | 30  |
|    |     |                     | 60 | 38 | 93 | 22 | 09 | 17 | 357 | 763 | 35  | w | 81  | 85  |
|    |     |                     | 4  | 3  | 5  | 3  | 7  | 3  | 667 | 333 | 76  | n | 77  | 92  |
|    |     |                     |    |    |    |    |    |    |     |     | 67  |   | 63  | 11  |
| 57 | LRC | Leucine-rich        | 3. | 4. | 4. | 3. | 3. | 3. | -1. | -0. | 1.6 | D | 0.0 | 0.9 |
| 63 | H2  | repeats and         | 78 | 16 | 71 | 38 | 34 | 73 | 661 | 732 | 61  | o | 15  | 30  |
| 1  |     | calponin homology   | 15 | 43 | 69 | 34 | 99 | 13 | 734 | 69  | 73  | w | 72  | 85  |
|    |     | (CH) domain         | 4  | 8  |    | 6  | 9  |    | 619 |     | 46  | n | 28  | 92  |
|    |     | containing 2        |    |    |    |    |    |    |     |     | 19  |   | 02  | 11  |
| 55 | GIM | Gtpase, IMAP        | 6. | 6. | 6. | 5. | 5. | 6. | -1. | -0. | 1.6 | D | 0.0 | 0.9 |
| 34 | AP5 | family member 5     | 16 | 20 | 81 | 11 | 78 | 11 | 652 | 724 | 52  | o | 40  | 30  |
| 0  |     |                     | 31 | 81 | 84 | 41 | 36 | 75 | 656 | 786 | 65  | w | 03  | 85  |
|    |     |                     | 8  | 1  |    | 9  | 3  | 1  | 238 | 667 | 62  | n | 95  | 92  |
|    |     |                     |    |    |    |    |    |    |     |     | 38  |   | 58  | 11  |
| 56 | ADC | Aarf domain         | 5. | 5. | 5. | 4. | 4. | 4. | -1. | -0. | 1.7 | D | 0.0 | 0.9 |
| 99 | K3  | containing kinase 3 | 32 | 81 | 52 | 68 | 66 | 90 | 747 | 805 | 47  | o | 01  | 30  |
| 7  |     |                     | 33 | 55 | 62 | 31 | 36 | 2  | 650 | 416 | 65  | w | 62  | 85  |
|    |     |                     | 1  |    | 6  | 9  | 3  |    | 46  | 667 | 04  | n | 46  | 92  |
|    |     |                     |    |    |    |    |    |    |     |     | 6   |   | 9   | 11  |
| 53 | ACP | Acid phosphatase    | 5. | 6. | 6. | 5. | 5. | 5. | -1. | -0. | 1.5 | D | 0.0 | 0.9 |
| 2  |     | 2, lysosomal        | 55 | 02 | 09 | 35 | 11 | 45 | 500 | 585 | 00  | o | 16  | 30  |
|    |     |                     | 84 | 60 | 71 | 14 | 94 | 36 | 784 | 716 | 78  | w | 12  | 85  |
|    |     |                     | 8  | 6  | 5  | 4  | 7  | 3  | 327 | 667 | 43  | n | 66  | 92  |
|    |     |                     |    |    |    |    |    |    |     |     | 27  |   | 65  | 11  |
| 70 | THY | Thy-1 cell surface  | 5. | 6. | 6. | 6. | 7. | 6. | 1.8 | 0.9 | 1.8 | U | 0.0 | 0.9 |

|    |      |                       |    |    |    |    |    |    |     |     |     |   |     |     |
|----|------|-----------------------|----|----|----|----|----|----|-----|-----|-----|---|-----|-----|
| 70 | 1    | antigen               | 34 | 41 | 08 | 27 | 36 | 94 | 830 | 130 | 83  | p | 32  | 30  |
|    |      |                       | 64 | 44 | 35 | 71 | 48 | 17 | 613 | 8   | 06  |   | 23  | 85  |
|    |      |                       | 6  | 4  | 8  | 4  | 8  |    | 45  |     | 13  |   | 43  | 92  |
|    |      |                       |    |    |    |    |    |    |     |     | 45  |   | 36  | 11  |
| 10 | PTG  | Prostaglandin E       | 7. | 8. | 8. | 7. | 6. | 7. | -1. | -0. | 1.8 | D | 0.0 | 0.9 |
| 72 | ES3  | synthase 3            | 85 | 31 | 65 | 68 | 49 | 95 | 867 | 900 | 67  | o | 49  | 30  |
| 8  |      |                       | 91 | 61 | 92 | 25 | 93 | 05 | 014 | 733 | 01  | w | 07  | 85  |
|    |      |                       | 9  |    | 7  | 1  | 4  | 1  | 76  | 333 | 47  | n | 96  | 92  |
|    |      |                       |    |    |    |    |    |    |     |     | 6   |   | 24  | 11  |
| 10 | SMC  | Structural            | 5. | 5. | 6. | 5. | 4. | 5. | -1. | -0. | 1.5 | D | 0.0 | 0.9 |
| 05 | 4    | maintenance of        | 52 | 87 | 07 | 45 | 80 | 36 | 532 | 615 | 32  | o | 28  | 30  |
| 1  |      | chromosomes 4         | 18 | 40 | 73 | 90 | 24 | 48 | 241 | 643 | 24  | w | 11  | 85  |
|    |      |                       | 8  | 5  | 4  | 6  | 5  | 3  | 109 | 333 | 11  | n | 91  | 92  |
|    |      |                       |    |    |    |    |    |    |     |     | 09  |   | 13  | 11  |
| 84 | LTB  | Latent                | 7. | 8. | 8. | 7. | 7. | 7. | -1. | -0. | 1.6 | D | 0.0 | 0.9 |
| 25 | P4   | transforming          | 45 | 28 | 32 | 01 | 50 | 48 | 612 | 689 | 12  | o | 33  | 30  |
|    |      | growth factor $\beta$ | 84 | 43 | 98 | 86 | 34 | 17 | 843 | 606 | 84  | w | 71  | 85  |
|    |      | binding protein 4     | 3  | 4  | 6  | 4  | 5  | 2  | 736 | 667 | 37  | n | 46  | 92  |
|    |      |                       |    |    |    |    |    |    |     |     | 36  |   | 64  | 11  |
| 26 | HSP  | Heat shock protein    | 5. | 6. | 6. | 4. | 5. | 4. | -2. | -1. | 2.1 | D | 0.0 | 0.9 |
| 35 | B8   | family B (small)      | 12 | 09 | 72 | 39 | 26 | 96 | 153 | 106 | 53  | o | 26  | 30  |
| 3  |      | member 8              | 54 | 18 | 62 | 26 | 67 | 37 | 689 | 81  | 68  | w | 93  | 85  |
|    |      |                       | 5  | 1  | 9  | 4  | 5  | 3  | 097 |     | 90  | n | 40  | 92  |
|    |      |                       |    |    |    |    |    |    |     |     | 97  |   | 48  | 11  |
| 72 | NPIP | Nuclear pore          | 5. | 5. | 6. | 4. | 4. | 5. | -1. | -0. | 1.8 | D | 0.0 | 0.9 |
| 88 | B11  | complex               | 15 | 57 | 33 | 89 | 32 | 20 | 841 | 881 | 41  | o | 31  | 30  |
| 88 |      | interacting protein   | 31 | 97 | 36 | 51 | 09 | 72 | 706 | 043 | 70  | w | 97  | 85  |
|    |      | family member         |    | 5  |    | 7  |    | 5  | 712 | 333 | 67  | n | 36  | 92  |
|    |      | B11                   |    |    |    |    |    |    |     |     | 12  |   | 18  | 11  |

|                |            |                                                             |                     |                     |                     |                     |                     |                      |                          |                          |                             |                  |                             |                             |
|----------------|------------|-------------------------------------------------------------|---------------------|---------------------|---------------------|---------------------|---------------------|----------------------|--------------------------|--------------------------|-----------------------------|------------------|-----------------------------|-----------------------------|
| 11<br>60<br>39 | OSR<br>2   | Odd-skipped<br>related transcription<br>factor 2            | 4.<br>40<br>67<br>2 | 4.<br>79<br>66<br>9 | 5.<br>36<br>32      | 4.<br>10<br>97<br>2 | 4.<br>00<br>27<br>2 | 4.<br>36<br>34<br>9  | -1.<br>621<br>010<br>385 | -0.<br>696<br>893<br>333 | 1.6<br>21<br>01<br>03<br>85 | D<br>o<br>w<br>n | 0.0<br>21<br>74<br>92<br>17 | 0.9<br>30<br>85<br>92<br>11 |
| 54<br>6        | ATR<br>X   | A<br>thalassemia/mental<br>retardation<br>syndrome X-linked | 6.<br>39<br>84<br>7 | 6.<br>62<br>03<br>5 | 5.<br>55<br>07<br>7 | 7.<br>25<br>43<br>8 | 7.<br>35<br>22<br>1 | 6.<br>63<br>97<br>4  | 1.8<br>560<br>642<br>69  | 0.8<br>922<br>466<br>67  | 1.8<br>56<br>06<br>42<br>69 | U<br>p           | 0.0<br>23<br>00<br>92<br>18 | 0.9<br>30<br>85<br>92<br>11 |
| 23<br>08<br>9  | PEG<br>10  | Paternally<br>expressed 10                                  | 5.<br>60<br>49<br>7 | 5.<br>55<br>79<br>5 | 5.<br>75<br>18<br>1 | 4.<br>85<br>55<br>9 | 4.<br>74<br>53<br>5 | 4.<br>96<br>3<br>054 | -1.<br>721<br>417<br>054 | -0.<br>783<br>596<br>667 | 1.7<br>21<br>41<br>70<br>54 | D<br>o<br>w<br>n | 0.0<br>00<br>55<br>06<br>92 | 0.9<br>30<br>85<br>92<br>11 |
| 63<br>87<br>4  | ABH<br>D4  | Abhydrolase<br>domain containing<br>4                       | 5.<br>24<br>33<br>5 | 5.<br>42<br>69<br>8 | 5.<br>60<br>51<br>2 | 4.<br>43<br>93<br>3 | 4.<br>75<br>68<br>3 | 5.<br>28<br>37<br>2  | -1.<br>514<br>165<br>953 | -0.<br>598<br>523<br>333 | 1.5<br>14<br>16<br>59<br>53 | D<br>o<br>w<br>n | 0.0<br>32<br>08<br>05<br>62 | 0.9<br>30<br>85<br>92<br>11 |
| 85<br>45<br>8  | DIX<br>DC1 | DIX domain<br>containing 1                                  | 7.<br>01<br>27<br>2 | 7.<br>70<br>90<br>6 | 7.<br>61<br>72<br>7 | 6.<br>10<br>30<br>5 | 6.<br>93<br>85<br>8 | 6.<br>67<br>56<br>7  | -1.<br>832<br>631<br>429 | -0.<br>873<br>916<br>667 | 1.8<br>32<br>63<br>14<br>29 | D<br>o<br>w<br>n | 0.0<br>13<br>08<br>68<br>26 | 0.9<br>30<br>85<br>92<br>11 |
| 23<br>57<br>6  | DDA<br>H1  | Dimethylarginine<br>dimethylaminohydr<br>olase 1            | 4.<br>32<br>04<br>3 | 4.<br>69<br>70<br>6 | 5.<br>26<br>37<br>1 | 4.<br>23<br>80<br>5 | 3.<br>29<br>35<br>7 | 3.<br>73<br>18<br>5  | -2.<br>008<br>209<br>804 | -1.<br>005<br>91<br>000  | 2.0<br>08<br>20<br>98       | D<br>o<br>w<br>n | 0.0<br>10<br>71<br>36       | 0.9<br>30<br>85<br>92       |

|    |      |                     |    |    |    |    |    |    |     |     |     |   |     |     |
|----|------|---------------------|----|----|----|----|----|----|-----|-----|-----|---|-----|-----|
|    |      |                     |    |    |    |    |    |    |     |     | 04  |   | 2   | 11  |
| 22 | PXD  | PX domain           | 7. | 7. | 7. | 8. | 8. | 8. | 1.5 | 0.6 | 1.5 | U | 0.0 | 0.9 |
| 17 | C1   | containing 1        | 66 | 89 | 58 | 97 | 00 | 18 | 937 | 723 | 93  | p | 32  | 30  |
| 49 |      |                     | 07 | 19 | 79 | 17 | 24 | 38 | 183 | 966 | 71  |   | 40  | 85  |
|    |      |                     | 8  | 9  | 8  | 1  | 3  |    | 23  | 67  | 83  |   | 67  | 92  |
|    |      |                     |    |    |    |    |    |    |     |     | 23  |   | 52  | 11  |
| 14 | CTN  | Catenin $\beta$ 1   | 6. | 7. | 7. | 6. | 6. | 6. | -1. | -0. | 1.7 | D | 0.0 | 0.9 |
| 99 | NB1  |                     | 90 | 76 | 26 | 22 | 42 | 76 | 787 | 837 | 87  | o | 10  | 30  |
|    |      |                     | 55 | 50 | 29 | 84 | 45 | 77 | 037 | 57  | 03  | w | 80  | 85  |
|    |      |                     | 2  | 3  | 4  | 5  | 9  | 4  | 613 |     | 76  | n | 63  | 92  |
|    |      |                     |    |    |    |    |    |    |     |     | 13  |   | 54  | 11  |
| 23 | NPIP | Nuclear pore        | 5. | 5. | 6. | 4. | 4. | 5. | -1. | -0. | 1.8 | D | 0.0 | 0.9 |
| 11 | B3   | complex             | 15 | 57 | 33 | 89 | 32 | 20 | 841 | 881 | 41  | o | 31  | 30  |
| 7  |      | interacting protein | 31 | 97 | 36 | 51 | 09 | 72 | 706 | 043 | 70  | w | 97  | 85  |
|    |      | family, member B3   |    | 5  |    | 7  |    | 5  | 712 | 333 | 67  | n | 36  | 92  |
|    |      |                     |    |    |    |    |    |    |     |     | 12  |   | 18  | 11  |
| 92 | NPIP | Nuclear pore        | 5. | 5. | 6. | 4. | 4. | 5. | -1. | -0. | 1.8 | D | 0.0 | 0.9 |
| 84 | A1   | complex             | 15 | 57 | 33 | 89 | 32 | 20 | 841 | 881 | 41  | o | 31  | 30  |
|    |      | interacting protein | 31 | 97 | 36 | 51 | 09 | 72 | 706 | 043 | 70  | w | 97  | 85  |
|    |      | family member A1    |    | 5  |    | 7  |    | 5  | 712 | 333 | 67  | n | 36  | 92  |
|    |      |                     |    |    |    |    |    |    |     |     | 12  |   | 18  | 11  |
| 23 | FAF2 | Fas associated      | 6. | 6. | 5. | 6. | 7. | 6. | 1.5 | 0.6 | 1.5 | U | 0.0 | 0.9 |
| 19 |      | factor family       | 59 | 13 | 74 | 84 | 13 | 40 | 548 | 367 | 54  | p | 46  | 30  |
| 7  |      | member 2            | 43 | 30 | 38 | 12 | 06 | 95 | 226 | 5   | 82  |   | 30  | 85  |
|    |      |                     | 6  | 1  | 4  | 5  | 8  | 3  | 18  |     | 26  |   | 06  | 92  |
|    |      |                     |    |    |    |    |    |    |     |     | 18  |   | 07  | 11  |
| 15 | ATP8 | Atpase, class I,    | 7. | 7. | 7. | 6. | 5. | 6. | -1. | -0. | 1.5 | D | 0.0 | 0.9 |
| 83 | B5P  | type 8B, member 5,  | 00 | 03 | 34 | 72 | 87 | 75 | 597 | 675 | 97  | o | 32  | 30  |
| 81 |      | pseudogene          | 63 | 75 | 07 | 69 | 27 | 87 | 021 | 383 | 02  | w | 54  | 85  |



|    |      |                     |    |    |    |    |    |    |     |     |     |   |     |     |
|----|------|---------------------|----|----|----|----|----|----|-----|-----|-----|---|-----|-----|
|    |      |                     | 8  | 1  | 6  | 8  | 6  | 6  | 055 | 333 | 10  | n | 27  | 92  |
|    |      |                     |    |    |    |    |    |    |     |     | 55  |   | 83  | 11  |
| 54 | NEU  | Neuralized E3       | 6. | 7. | 8. | 5. | 7. | 6. | -2. | -1. | 2.4 | D | 0.0 | 0.9 |
| 49 | RL1  | ubiquitin protein   | 76 | 88 | 48 | 43 | 11 | 63 | 490 | 316 | 90  | o | 39  | 30  |
| 2  | B    | ligase 1B           | 12 | 73 | 16 | 41 | 17 | 46 | 778 | 596 | 77  | w | 37  | 85  |
|    |      |                     | 1  | 9  | 9  | 8  | 1  | 1  | 388 | 667 | 83  | n | 94  | 92  |
|    |      |                     |    |    |    |    |    |    |     |     | 88  |   | 2   | 11  |
| 49 | OGN  | Osteoglycin         | 6. | 6. | 6. | 4. | 5. | 5. | -2. | -1. | 2.3 | D | 0.0 | 0.9 |
| 69 |      |                     | 13 | 35 | 20 | 01 | 34 | 59 | 372 | 246 | 72  | o | 12  | 30  |
|    |      |                     | 13 | 18 | 64 | 08 | 57 | 29 | 996 | 71  | 99  | w | 11  | 85  |
|    |      |                     |    | 4  | 8  | 4  | 5  |    | 545 |     | 65  | n | 93  | 92  |
|    |      |                     |    |    |    |    |    |    |     |     | 45  |   | 35  | 11  |
| 63 | TNN  | Tenascin N          | 4. | 3. | 4. | 3. | 4. | 3. | -1. | -0. | 1.5 | D | 0.0 | 0.9 |
| 92 |      |                     | 81 | 97 | 90 | 81 | 21 | 77 | 551 | 633 | 51  | o | 41  | 30  |
| 3  |      |                     | 36 | 78 | 85 | 28 | 1  | 59 | 223 | 406 | 22  | w | 88  | 85  |
|    |      |                     | 8  | 5  | 5  | 7  |    | 9  | 61  | 667 | 36  | n | 57  | 92  |
|    |      |                     |    |    |    |    |    |    |     |     | 1   |   | 33  | 11  |
| 72 | NPIP | Nuclear pore        | 5. | 5. | 6. | 4. | 4. | 5. | -1. | -0. | 1.8 | D | 0.0 | 0.9 |
| 96 | B1P  | complex             | 15 | 57 | 33 | 89 | 32 | 20 | 841 | 881 | 41  | o | 31  | 30  |
| 02 |      | interacting protein | 31 | 97 | 36 | 51 | 09 | 72 | 706 | 043 | 70  | w | 97  | 85  |
|    |      | family member B1,   |    | 5  |    | 7  |    | 5  | 712 | 333 | 67  | n | 36  | 92  |
|    |      | pseudogene          |    |    |    |    |    |    |     |     | 12  |   | 18  | 11  |
| 50 | HDG  | Hepatoma-derived    | 5. | 5. | 5. | 4. | 5. | 4. | -1. | -0. | 1.5 | D | 0.0 | 0.9 |
| 81 | FRP3 | growth factor,      | 12 | 43 | 90 | 71 | 11 | 81 | 526 | 610 | 26  | o | 26  | 30  |
| 0  |      | related protein 3   | 77 | 79 | 89 | 38 | 36 | 65 | 506 | 233 | 50  | w | 60  | 85  |
|    |      |                     | 9  | 9  | 7  | 9  |    | 6  | 077 | 333 | 60  | n | 28  | 92  |
|    |      |                     |    |    |    |    |    |    |     |     | 77  |   | 78  | 11  |
| 10 | CWC  | CWC27               | 8. | 8. | 8. | 9. | 9. | 9. | 1.6 | 0.6 | 1.6 | U | 0.0 | 0.9 |
| 28 | 27   | spliceosome-associ  | 87 | 63 | 69 | 87 | 25 | 12 | 036 | 813 | 03  | p | 12  | 30  |

|    |     |                                                 |               |               |               |               |               |               |                   |                   |                      |             |                      |                      |
|----|-----|-------------------------------------------------|---------------|---------------|---------------|---------------|---------------|---------------|-------------------|-------------------|----------------------|-------------|----------------------|----------------------|
| 3  |     | ated protein<br>homolog                         | 90<br>1       | 35<br>1       | 44<br>1       | 16            | 13<br>5       | 79<br>4       | 063<br>11         | 2                 | 60<br>63<br>11       |             | 89<br>15<br>49       | 85<br>92<br>11       |
| 11 | ADC | Adenylate cyclase                               | 5.            | 6.            | 6.            | 4.            | 5.            | 5.            | -1.               | -0.               | 1.5                  | D           | 0.0                  | 0.9                  |
| 7  | YAP | activating                                      | 80            | 41            | 13            | 97            | 82            | 70            | 532               | 615               | 32                   | o           | 48                   | 30                   |
|    | 1R1 | polypeptide 1<br>(pituitary) receptor<br>type I | 99<br>3       | 24<br>6       | 54<br>6       | 95<br>4       | 90<br>3       | 24<br>2       | 216<br>328        | 62                | 21<br>63<br>28       | w<br>n      | 98<br>36<br>53       | 85<br>92<br>11       |
| 20 | STO | Stomatin                                        | 5.            | 6.            | 6.            | 5.            | 5.            | 5.            | -1.               | -0.               | 1.6                  | D           | 0.0                  | 0.9                  |
| 40 | M   |                                                 | 84<br>63<br>6 | 31<br>65<br>1 | 79<br>98<br>7 | 97<br>89<br>1 | 22<br>75<br>9 | 71<br>00<br>6 | 604<br>429<br>058 | 682<br>06         | 04<br>42<br>90<br>58 | o<br>w<br>n | 45<br>86<br>34<br>4  | 30<br>85<br>92<br>11 |
| 51 | ARM | Armadillo repeat                                | 7.            | 8.            | 8.            | 6.            | 7.            | 7.            | -1.               | -0.               | 1.5                  | D           | 0.0                  | 0.9                  |
| 30 | CX1 | containing,                                     | 42            | 23            | 01            | 93            | 26            | 64            | 527               | 610               | 27                   | o           | 49                   | 30                   |
| 9  |     | X-linked 1                                      | 65<br>5       | 88<br>8       | 52<br>6       | 63<br>9       | 67<br>4       | 49<br>4       | 183<br>407        | 873<br>333        | 18<br>34<br>07       | w<br>n      | 89<br>69<br>96       | 85<br>92<br>11       |
| 78 | SLM | Sarcolemma                                      | 4.            | 4.            | 5.            | 3.            | 3.            | 3.            | -1.               | -0.               | 1.6                  | D           | 0.0                  | 0.9                  |
| 71 | AP  | associated protein                              | 09<br>88<br>3 | 20<br>24<br>3 | 09<br>17<br>3 | 99<br>51<br>4 | 55<br>45<br>4 | 64<br>39<br>4 | 662<br>222<br>297 | 733<br>113<br>333 | 62<br>22<br>22<br>97 | o<br>w<br>n | 27<br>11<br>64<br>13 | 30<br>85<br>92<br>11 |
| 59 | RAP | RAP1B, member                                   | 4.            | 4.            | 5.            | 4.            | 3.            | 4.            | -1.               | -0.               | 1.6                  | D           | 0.0                  | 0.9                  |
| 08 | 1B  | of RAS oncogene<br>family                       | 58<br>07<br>6 | 65<br>86<br>9 | 24<br>06<br>7 | 40<br>31<br>2 | 56<br>14<br>6 | 28<br>57<br>4 | 673<br>961<br>871 | 743<br>266<br>667 | 73<br>96<br>18<br>71 | o<br>w<br>n | 24<br>86<br>34<br>96 | 30<br>85<br>92<br>11 |
| 15 | SH3 | SH3 domain                                      | 6.            | 6.            | 6.            | 5.            | 5.            | 5.            | -1.               | -0.               | 1.5                  | D           | 0.0                  | 0.9                  |

|    |     |                     |    |    |    |    |    |    |     |     |     |   |     |     |
|----|-----|---------------------|----|----|----|----|----|----|-----|-----|-----|---|-----|-----|
| 25 | D19 | containing 19       | 02 | 04 | 48 | 55 | 34 | 84 | 516 | 600 | 16  | o | 17  | 30  |
| 03 |     |                     | 06 | 02 | 98 | 88 | 85 | 23 | 087 | 353 | 08  | w | 72  | 85  |
|    |     |                     | 9  | 2  | 1  | 4  | 1  | 1  | 829 | 333 | 78  | n | 56  | 92  |
|    |     |                     |    |    |    |    |    |    |     |     | 29  |   | 81  | 11  |
| 51 | CES | Carboxylesterase 1  | 5. | 6. | 5. | 3. | 3. | 5. | -3. | -1. | 3.5 | D | 0.0 | 0.9 |
| 71 | IP1 | pseudogene 1        | 99 | 71 | 75 | 81 | 71 | 41 | 579 | 839 | 79  | o | 04  | 30  |
| 6  |     |                     | 37 | 48 | 33 | 69 | 49 | 05 | 570 | 786 | 57  | w | 69  | 85  |
|    |     |                     | 1  |    | 1  |    | 7  | 9  | 928 | 667 | 09  | n | 37  | 92  |
|    |     |                     |    |    |    |    |    |    |     |     | 28  |   | 4   | 11  |
| 53 | FXD | FXD domain          | 6. | 7. | 7. | 4. | 6. | 5. | -2. | -1. | 2.7 | D | 0.0 | 0.9 |
| 82 | D6  | containing ion      | 34 | 23 | 97 | 41 | 85 | 85 | 780 | 475 | 80  | o | 48  | 30  |
| 6  |     | transport regulator | 29 | 23 | 33 | 66 | 59 | 01 | 401 | 293 | 40  | w | 83  | 85  |
|    |     | 6                   | 3  | 7  | 2  | 9  | 2  | 3  | 702 | 333 | 17  | n | 12  | 92  |
|    |     |                     |    |    |    |    |    |    |     |     | 02  |   | 46  | 11  |
| 33 | HSP | Heat shock protein  | 8. | 8. | 8. | 7. | 7. | 7. | -1. | -0. | 1.5 | D | 0.0 | 0.9 |
| 13 | A9  | family A (Hsp70)    | 07 | 13 | 45 | 82 | 24 | 75 | 530 | 614 | 30  | o | 16  | 30  |
|    |     | member 9            | 45 | 40 | 76 | 05 | 70 | 56 | 864 | 346 | 86  | w | 53  | 85  |
|    |     |                     | 4  | 7  | 1  | 6  | 2  |    | 579 | 667 | 45  | n | 28  | 92  |
|    |     |                     |    |    |    |    |    |    |     |     | 79  |   | 91  | 11  |
| 36 | ITG | Integrin $\beta$ 1  | 8. | 9. | 9. | 8. | 8. | 9. | -1. | -0. | 1.7 | D | 0.0 | 0.9 |
| 88 | B1  |                     | 97 | 53 | 70 | 61 | 20 | 04 | 724 | 785 | 24  | o | 18  | 30  |
|    |     |                     | 99 | 60 | 82 | 33 | 96 | 32 | 251 | 97  | 25  | w | 71  | 85  |
|    |     |                     | 3  | 8  | 2  | 8  | 9  | 5  | 235 |     | 12  | n | 38  | 92  |
|    |     |                     |    |    |    |    |    |    |     |     | 35  |   | 06  | 11  |
| 17 | DLA | Dihydrolipoamide    | 5. | 5. | 5. | 4. | 4. | 4. | -1. | -0. | 1.5 | D | 0.0 | 0.9 |
| 37 | T   | S-acetyltransferase | 17 | 11 | 40 | 92 | 23 | 68 | 533 | 616 | 33  | o | 15  | 30  |
|    |     |                     | 30 | 13 | 99 | 27 | 79 | 43 | 062 | 416 | 06  | w | 49  | 85  |
|    |     |                     | 5  |    | 8  | 4  | 9  | 5  | 662 | 667 | 26  | n | 80  | 92  |
|    |     |                     |    |    |    |    |    |    |     |     | 62  |   | 7   | 11  |

|               |                 |                                           |                      |                      |                     |                      |                      |                      |                          |                          |                             |                  |                             |                             |
|---------------|-----------------|-------------------------------------------|----------------------|----------------------|---------------------|----------------------|----------------------|----------------------|--------------------------|--------------------------|-----------------------------|------------------|-----------------------------|-----------------------------|
| 44<br>95      | MT1<br>G        | Metallothionein 1G                        | 11<br>.9<br>28<br>11 | 9.<br>02<br>56<br>3  | 8.<br>27<br>65<br>8 | 12<br>.0<br>46<br>33 | 11<br>.7<br>69<br>97 | 12<br>.3<br>44<br>09 | 4.9<br>589<br>110<br>02  | 2.3<br>100<br>233<br>33  | 4.9<br>58<br>91<br>10<br>02 | U<br>p           | 0.0<br>24<br>06<br>04<br>91 | 0.9<br>30<br>85<br>92<br>11 |
| 54<br>20<br>6 | ERR<br>FII<br>1 | ERBB receptor<br>feedback inhibitor<br>1  | 8.<br>66<br>74<br>6  | 10<br>.0<br>52<br>74 | 9.<br>31<br>91<br>2 | 8.<br>52<br>72<br>1  | 8.<br>45<br>32<br>1  | 8.<br>66<br>68<br>1  | -1.<br>737<br>922<br>333 | -0.<br>797<br>363<br>2   | 1.7<br>37<br>92<br>2        | D<br>o<br>w<br>n | 0.0<br>37<br>28<br>08<br>72 | 0.9<br>30<br>85<br>92<br>11 |
| 93<br>78      | NRX<br>N1       | Neurexin 1                                | 4.<br>27<br>42<br>3  | 4.<br>40<br>92<br>9  | 4.<br>13<br>28<br>6 | 3.<br>67<br>31<br>3  | 3.<br>75<br>53<br>2  | 3.<br>61<br>40<br>2  | -1.<br>506<br>607<br>204 | -0.<br>591<br>303<br>333 | 1.5<br>06<br>60<br>72<br>04 | D<br>o<br>w<br>n | 0.0<br>01<br>28<br>91<br>26 | 0.9<br>30<br>85<br>92<br>11 |
| 15<br>24      | CX3<br>CR1      | Chemokine<br>(C-X3-C motif)<br>receptor 1 | 9.<br>25<br>31       | 9.<br>58<br>87<br>5  | 9.<br>94<br>03<br>6 | 8.<br>19<br>67<br>2  | 8.<br>92<br>09<br>6  | 9.<br>40<br>12<br>9  | -1.<br>686<br>945<br>463 | -0.<br>754<br>413<br>333 | 1.6<br>86<br>94<br>54<br>63 | D<br>o<br>w<br>n | 0.0<br>44<br>57<br>40<br>85 | 0.9<br>30<br>85<br>92<br>11 |
| 51<br>20<br>1 | ZDH<br>HC2      | Zinc finger,<br>DHHC-type<br>containing 2 | 4.<br>08<br>37<br>8  | 4.<br>20<br>00<br>9  | 4.<br>72<br>62<br>4 | 3.<br>54<br>88<br>4  | 3.<br>53<br>12<br>6  | 4.<br>13<br>64<br>7  | -1.<br>513<br>441<br>943 | -0.<br>597<br>833<br>333 | 1.5<br>13<br>44<br>19<br>43 | D<br>o<br>w<br>n | 0.0<br>31<br>35<br>16<br>53 | 0.9<br>30<br>85<br>92<br>11 |
| 14<br>65      | CSR<br>P1       | Cysteine and<br>glycine rich protein<br>1 | 7.<br>37<br>25       | 7.<br>62<br>53<br>5  | 7.<br>87<br>90<br>9 | 6.<br>60<br>63<br>4  | 7.<br>50<br>71       | 6.<br>84<br>28<br>2  | -1.<br>558<br>574<br>013 | -0.<br>640<br>226<br>667 | 1.5<br>58<br>57<br>40       | D<br>o<br>w<br>n | 0.0<br>38<br>58<br>72       | 0.9<br>30<br>85<br>92       |

|                |            |                                                 |                     |                     |                     |                     |                     |                     |                          |                         |                             |                  |                             |                             |
|----------------|------------|-------------------------------------------------|---------------------|---------------------|---------------------|---------------------|---------------------|---------------------|--------------------------|-------------------------|-----------------------------|------------------|-----------------------------|-----------------------------|
|                |            |                                                 |                     |                     |                     |                     |                     |                     |                          |                         | 13                          |                  | 56                          | 11                          |
| 82<br>1        | CAN<br>X   | Calnexin                                        | 9.<br>09<br>13<br>7 | 9.<br>28<br>20<br>7 | 9.<br>59<br>34      | 8.<br>79<br>88<br>3 | 8.<br>24<br>24<br>5 | 8.<br>94<br>03<br>1 | -1.<br>582<br>000<br>439 | -0.<br>661<br>75        | 1.5<br>82<br>00<br>04<br>39 | D<br>o<br>w<br>n | 0.0<br>18<br>39<br>20<br>48 | 0.9<br>30<br>85<br>92<br>11 |
| 11<br>59<br>08 | CTH<br>RC1 | Collagen triple<br>helix repeat<br>containing 1 | 5.<br>02<br>94<br>1 | 5.<br>80<br>81<br>1 | 5.<br>80<br>25<br>3 | 4.<br>65<br>03<br>2 | 4.<br>95<br>39<br>6 | 4.<br>86<br>17<br>3 | -1.<br>652<br>534<br>052 | -0.<br>724<br>68        | 1.6<br>52<br>53<br>40<br>52 | D<br>o<br>w<br>n | 0.0<br>15<br>35<br>43<br>62 | 0.9<br>30<br>85<br>92<br>11 |
| 68<br>3        | BST<br>1   | Bone marrow<br>stromal cell antigen<br>1        | 4.<br>05<br>17<br>9 | 5.<br>32<br>45<br>1 | 5.<br>75<br>01<br>1 | 6.<br>81<br>31<br>4 | 6.<br>22<br>16<br>1 | 6.<br>59<br>81<br>9 | 2.8<br>327<br>042<br>81  | 1.5<br>021<br>8         | 2.8<br>32<br>70<br>42<br>81 | U<br>p           | 0.0<br>07<br>02<br>19<br>3  | 0.9<br>30<br>85<br>92<br>11 |
| 11<br>31<br>46 | AHN<br>AK2 | AHNAK<br>nucleoprotein 2                        | 4.<br>37<br>38<br>8 | 5.<br>52<br>91<br>2 | 5.<br>49<br>26<br>5 | 5.<br>43<br>32<br>5 | 6.<br>38<br>60<br>6 | 6.<br>63<br>59<br>3 | 2.0<br>277<br>268<br>64  | 1.0<br>198<br>633<br>33 | 2.0<br>27<br>72<br>68<br>64 | U<br>p           | 0.0<br>36<br>54<br>87<br>85 | 0.9<br>30<br>85<br>92<br>11 |
| 71<br>68       | TPM<br>1   | Tropomyosin 1 ( $\alpha$ )                      | 7.<br>58<br>71<br>7 | 7.<br>70<br>45<br>1 | 8.<br>07<br>18<br>1 | 7.<br>00<br>51<br>1 | 7.<br>40<br>95<br>2 | 6.<br>80<br>19<br>6 | -1.<br>642<br>200<br>182 | -0.<br>715<br>63        | 1.6<br>42<br>20<br>01<br>82 | D<br>o<br>w<br>n | 0.0<br>09<br>99<br>61<br>8  | 0.9<br>30<br>85<br>92<br>11 |
| 88<br>05       | TRI<br>M24 | Tripartite motif<br>containing 24               | 6.<br>89<br>03      | 6.<br>75<br>18      | 6.<br>95<br>36      | 7.<br>83<br>57      | 7.<br>46<br>5       | 7.<br>25<br>39      | 1.5<br>724<br>055        | 0.6<br>529<br>733       | 1.5<br>72<br>40             | U<br>p           | 0.0<br>07<br>95             | 0.9<br>30<br>85             |

|    |     |                                              |    |    |    |    |    |    |     |      |     |   |     |     |
|----|-----|----------------------------------------------|----|----|----|----|----|----|-----|------|-----|---|-----|-----|
|    |     |                                              |    | 5  |    | 5  |    | 2  | 2   | 33   | 55  |   | 88  | 92  |
|    |     |                                              |    |    |    |    |    |    |     |      | 2   |   | 25  | 11  |
| 58 | QAR | Glutaminyl-trna synthetase                   | 6. | 7. | 7. | 6. | 6. | 6. | -1. | -0.  | 1.5 | D | 0.0 | 0.9 |
| 59 | S   |                                              | 62 | 07 | 32 | 58 | 11 | 45 | 537 | 620  | 37  | o | 24  | 30  |
|    |     |                                              | 21 | 59 | 05 | 42 | 95 | 25 | 645 | 723  | 64  | w | 13  | 85  |
|    |     |                                              | 1  |    | 5  | 6  | 5  | 8  | 928 | 333  | 59  | n | 85  | 92  |
|    |     |                                              |    |    |    |    |    |    |     |      | 28  |   | 99  | 11  |
| 72 | CBW | COBW domain containing 7                     | 4. | 3. | 4. | 3. | 3. | 3. | -1. | -0.  | 1.6 | D | 0.0 | 0.9 |
| 80 | D7  |                                              | 45 | 86 | 15 | 71 | 32 | 19 | 674 | 744  | 74  | o | 05  | 30  |
| 13 |     |                                              | 21 | 23 | 27 | 57 | 17 | 77 | 812 |      | 81  | w | 34  | 85  |
|    |     |                                              | 2  | 7  | 1  | 4  | 2  | 4  | 975 |      | 29  | n | 61  | 92  |
|    |     |                                              |    |    |    |    |    |    |     |      | 75  |   | 82  | 11  |
| 33 | HSP | Heat shock protein family A (Hsp70) member 5 | 8. | 8. | 9. | 8. | 7. | 8. | -1. | -0.  | 1.9 | D | 0.0 | 0.9 |
| 09 | A5  |                                              | 23 | 88 | 21 | 20 | 01 | 17 | 972 | 979  | 72  | o | 31  | 30  |
|    |     |                                              | 67 | 38 | 29 | 75 | 23 | 42 | 214 | 816  | 21  | w | 76  | 85  |
|    |     |                                              | 1  | 6  | 8  | 8  | 2  |    | 77  | 667  | 47  | n | 00  | 92  |
|    |     |                                              |    |    |    |    |    |    |     |      | 7   |   | 93  | 11  |
| 56 | PRO | Protein S ( $\alpha$ )                       | 5. | 5. | 6. | 5. | 5. | 5. | -1. | -0.  | 1.5 | D | 0.0 | 0.9 |
| 27 | S1  |                                              | 90 | 91 | 62 | 46 | 15 | 82 | 587 | 666  | 87  | o | 33  | 30  |
|    |     |                                              | 22 | 85 | 52 | 55 | 67 | 36 | 430 | 693  | 43  | w | 06  | 85  |
|    |     |                                              | 2  | 9  | 6  | 6  | 5  | 8  | 394 | 333  | 03  | n | 68  | 92  |
|    |     |                                              |    |    |    |    |    |    |     |      | 94  |   | 23  | 11  |
| 11 | SCR | Stimulator of chondrogenesis 1               | 6. | 6. | 7. | 3. | 6. | 4. | -4. | -2.1 | 4.3 | D | 0.0 | 0.9 |
| 34 | G1  |                                              | 07 | 67 | 42 | 25 | 56 | 00 | 342 | 186  | 42  | o | 29  | 30  |
| 1  |     |                                              | 58 | 91 | 85 | 43 | 35 | 95 | 964 | 8    | 96  | w | 03  | 85  |
|    |     |                                              |    | 1  | 6  | 1  | 5  | 7  | 018 |      | 40  | n | 85  | 92  |
|    |     |                                              |    |    |    |    |    |    |     |      | 18  |   | 89  | 11  |
| 37 | KCN | Potassium channel, calcium activated         | 7. | 8. | 8. | 4. | 8. | 6. | -3. | -1.  | 3.5 | D | 0.0 | 0.9 |
| 78 | MA1 |                                              | 41 | 59 | 68 | 98 | 23 | 03 | 514 | 813  | 14  | o | 46  | 30  |

|               |            |                                                                   |                      |                      |                      |                      |                      |                      |                          |                          |                             |                  |                             |                             |
|---------------|------------|-------------------------------------------------------------------|----------------------|----------------------|----------------------|----------------------|----------------------|----------------------|--------------------------|--------------------------|-----------------------------|------------------|-----------------------------|-----------------------------|
|               |            | large conductance<br>subfamily M $\alpha$ ,<br>member 1           | 35<br>2              | 06<br>7              | 61<br>9              | 01<br>1              | 01<br>2              | 98<br>3              | 793<br>668               | 44                       | 79<br>36<br>68              | w<br>n           | 77<br>38<br>15              | 85<br>92<br>11              |
| 28<br>51<br>4 | DLL<br>1   | $\Delta$ -like<br>( <i>Drosophila</i> )                           | 1<br>5.<br>46<br>12  | 5.<br>5.<br>76<br>58 | 6.<br>6.<br>20<br>34 | 4.<br>4.<br>88<br>72 | 5.<br>5.<br>47<br>14 | 5.<br>5.<br>10<br>64 | -1.<br>-0.<br>574<br>739 | -0.<br>-0.<br>655<br>113 | 1.5<br>1.5<br>74<br>73      | D<br>o<br>w      | 0.0<br>0.0<br>25<br>01      | 0.9<br>30<br>85             |
| 81<br>87<br>6 | RAB<br>1B  | RAB1B, member<br>RAS oncogene<br>family                           | 6.<br>12<br>7        | 5.<br>95<br>06       | 5.<br>60<br>56       | 5.<br>27<br>50       | 4.<br>93<br>54       | 5.<br>31<br>74       | -1.<br>645<br>398        | -0.<br>718<br>436        | 1.6<br>45<br>39             | D<br>o<br>w      | 0.0<br>05<br>82             | 0.9<br>30<br>85             |
|               |            |                                                                   |                      | 2                    | 2                    | 2                    | 7                    | 4                    | 082                      | 667                      | 80                          | n                | 23                          | 92                          |
|               |            |                                                                   |                      |                      |                      |                      |                      |                      |                          |                          | 82                          |                  | 44                          | 11                          |
| 31<br>27      | HLA<br>-DR | Major<br>histocompatibility<br>complex, class II,<br>DR $\beta$ 5 | 10<br>.1<br>20<br>15 | 10<br>.2<br>33<br>12 | 11<br>.0<br>53<br>67 | 9.<br>24<br>28<br>4  | 10<br>.0<br>67<br>13 | 9.<br>22<br>63<br>2  | -1.<br>941<br>111<br>961 | -0.<br>956<br>883<br>333 | 1.9<br>1.9<br>11<br>96<br>1 | D<br>o<br>w<br>n | 0.0<br>16<br>70<br>42       | 0.9<br>30<br>85<br>92       |
| 71<br>02      | TSP<br>AN7 | Tetraspanin 7                                                     | 4.<br>38<br>33<br>3  | 5.<br>27<br>92<br>2  | 5.<br>89<br>00<br>3  | 3.<br>94<br>26<br>4  | 4.<br>14<br>82<br>6  | 4.<br>55<br>76<br>8  | -1.<br>956<br>126<br>947 | -0.<br>968               | 1.9<br>56<br>12<br>69<br>47 | D<br>o<br>w<br>n | 0.0<br>29<br>32<br>97<br>59 | 0.9<br>30<br>85<br>92<br>11 |
| 55<br>32<br>9 | MNS<br>1   | Meiosis specific<br>nuclear structural 1                          | 3.<br>77<br>03<br>5  | 4.<br>53<br>52<br>8  | 4.<br>18<br>24<br>2  | 3.<br>36<br>73<br>2  | 3.<br>52<br>16<br>3  | 3.<br>60<br>90<br>5  | -1.<br>583<br>755<br>907 | -0.<br>663<br>35         | 1.5<br>83<br>75<br>59<br>07 | D<br>o<br>w<br>n | 0.0<br>09<br>87<br>03<br>3  | 0.9<br>30<br>85<br>92<br>11 |
| 31            | HLA        | Major                                                             | 8.                   | 8.                   | 8.                   | 7.                   | 8.                   | 8.                   | -1.                      | -0.                      | 1.6                         | D                | 0.0                         | 0.9                         |

|    |     |                     |    |    |    |    |    |    |     |     |     |   |     |     |
|----|-----|---------------------|----|----|----|----|----|----|-----|-----|-----|---|-----|-----|
| 17 | -DQ | histocompatibility  | 33 | 36 | 95 | 22 | 02 | 17 | 669 | 739 | 69  | o | 34  | 30  |
|    | A1  | complex, class II,  | 24 | 48 | 06 | 60 | 51 | 97 | 022 | 003 | 02  | w | 17  | 85  |
|    |     | DQ $\alpha$ 1       | 2  | 8  | 9  | 8  | 3  | 7  | 419 | 333 | 24  | n | 87  | 92  |
|    |     |                     |    |    |    |    |    |    |     |     | 19  |   | 05  | 11  |
| 25 | RAL | Ral gtpase          | 4. | 4. | 4. | 4. | 3. | 3. | -1. | -0. | 1.6 | D | 0.0 | 0.9 |
| 39 | GAP | activating protein, | 20 | 95 | 66 | 20 | 37 | 96 | 691 | 758 | 91  | o | 20  | 30  |
| 59 | A1  | $\alpha$ subunit 1  | 14 | 49 | 12 | 16 | 79 | 37 | 246 | 086 | 24  | w | 59  | 85  |
|    |     | (catalytic)         | 2  | 8  | 9  | 8  | 6  | 9  | 17  | 667 | 61  | n | 73  | 92  |
|    |     |                     |    |    |    |    |    |    |     |     | 7   |   | 06  | 11  |
| 64 | SRS | Serine/arginine-ric | 4. | 5. | 5. | 4. | 3. | 4. | -2. | -1. | 2.2 | D | 0.0 | 0.9 |
| 30 | F5  | h splicing factor 5 | 00 | 55 | 40 | 33 | 06 | 09 | 231 | 158 | 31  | o | 39  | 30  |
|    |     |                     | 78 | 25 | 63 | 01 | 37 | 87 | 478 |     | 47  | w | 81  | 85  |
|    |     |                     | 7  |    |    | 6  | 8  | 3  | 645 |     | 86  | n | 00  | 92  |
|    |     |                     |    |    |    |    |    |    |     |     | 45  |   | 41  | 11  |
| 23 | TBC | TBC1 domain         | 5. | 6. | 5. | 5. | 5. | 5. | -1. | -0. | 1.6 | D | 0.0 | 0.9 |
| 15 | 1D9 | family member 9     | 71 | 01 | 99 | 30 | 04 | 09 | 692 | 758 | 92  | o | 01  | 30  |
| 8  |     |                     | 10 | 23 | 48 | 61 | 01 | 52 | 188 | 89  | 18  | w | 44  | 85  |
|    |     |                     | 7  | 8  | 1  | 2  | 8  | 9  | 165 |     | 81  | n | 64  | 92  |
|    |     |                     |    |    |    |    |    |    |     |     | 65  |   | 91  | 11  |
| 10 | CEL | Chymotrypsin like   | 4. | 3. | 3. | 4. | 4. | 4. | 1.8 | 0.8 | 1.8 | U | 0.0 | 0.9 |
| 13 | A3A | elastase family     | 04 | 43 | 87 | 69 | 41 | 94 | 657 | 997 | 65  | p | 02  | 30  |
| 6  |     | member 3A           | 43 | 44 | 75 | 02 | 69 | 85 | 857 | 833 | 78  |   | 40  | 85  |
|    |     |                     | 5  | 5  | 3  |    | 3  | 5  | 55  | 33  | 57  |   | 97  | 92  |
|    |     |                     |    |    |    |    |    |    |     |     | 55  |   | 76  | 11  |
| 25 | RNF | Ring finger protein | 6. | 6. | 7. | 6. | 5. | 6. | -1. | -0. | 1.5 | D | 0.0 | 0.9 |
| 89 | 19A | 19A, RBR E3         | 36 | 79 | 07 | 58 | 79 | 03 | 519 | 603 | 19  | o | 49  | 30  |
| 7  |     | ubiquitin protein   | 61 | 02 | 07 | 11 | 82 | 66 | 626 | 716 | 62  | w | 81  | 85  |
|    |     | ligase              | 9  | 6  | 2  | 7  | 5  |    | 385 | 667 | 63  | n | 84  | 92  |
|    |     |                     |    |    |    |    |    |    |     |     | 85  |   | 93  | 11  |



|                |                  |                                                                                    |                     |                     |                     |                       |                     |                       |                          |                             |                             |                  |                             |                             |
|----------------|------------------|------------------------------------------------------------------------------------|---------------------|---------------------|---------------------|-----------------------|---------------------|-----------------------|--------------------------|-----------------------------|-----------------------------|------------------|-----------------------------|-----------------------------|
| 28<br>13       | GP2              | Glycoprotein 2<br>(zymogen granule<br>membrane)                                    | 8.<br>37<br>85<br>4 | 7.<br>58<br>38<br>6 | 8.<br>09<br>43<br>9 | 9.<br>37<br>07<br>4   | 8.<br>31<br>54<br>5 | 9.<br>98<br>32<br>7   | 2.3<br>041<br>319<br>43  | 1.2<br>042<br>233<br>33     | 2.3<br>04<br>13<br>19<br>43 | U<br>p           | 0.0<br>19<br>71<br>05<br>27 | 0.9<br>30<br>85<br>92<br>11 |
| 25<br>84<br>2  | ASF<br>1A        | Anti-silencing<br>function 1A histone<br>chaperone                                 | 6.<br>22<br>84<br>1 | 6.<br>06<br>92<br>5 | 6.<br>59<br>13<br>6 | 5.<br>49<br>80<br>2   | 5.<br>60<br>34<br>1 | 6.<br>02<br>82<br>2   | -1.<br>501<br>554<br>32  | -0.<br>586<br>456<br>667    | 1.5<br>01<br>55<br>43<br>2  | D<br>o<br>w<br>n | 0.0<br>23<br>46<br>37<br>83 | 0.9<br>30<br>85<br>92<br>11 |
| 34<br>00       | ID4              | Inhibitor of DNA<br>binding 4,<br>dominant negative<br>helix-loop-helix<br>protein | 5.<br>87<br>14      | 7.<br>28<br>09<br>6 | 6.<br>23<br>38<br>9 | 4.<br>29<br>69<br>1   | 3.<br>69<br>40<br>6 | 3.<br>86<br>51<br>3   | -5.<br>696<br>398<br>201 | -2.<br>510<br>05<br>82      | 5.6<br>96<br>39<br>82<br>01 | D<br>o<br>w<br>n | 0.0<br>00<br>13<br>22<br>82 | 0.9<br>30<br>85<br>92<br>11 |
| 65<br>06<br>69 | GAS<br>6-AS<br>1 | GAS6 antisense<br>RNA 1                                                            | 5.<br>72<br>01<br>2 | 5.<br>08<br>71<br>3 | 6.<br>12<br>16<br>2 | 6.<br>74<br>31<br>1   | 6.<br>86<br>89<br>6 | 6.<br>05<br>49<br>6   | 1.8<br>825<br>654<br>2   | 0.9<br>127<br>56<br>54<br>2 | 1.8<br>82<br>56<br>54<br>2  | U<br>p           | 0.0<br>20<br>53<br>74<br>09 | 0.9<br>30<br>85<br>92<br>11 |
| 54<br>93       | PPL              | Periplakin                                                                         | 9.<br>27<br>74<br>3 | 9.<br>66<br>64<br>3 | 9.<br>32<br>48<br>3 | 10.<br>.4<br>97<br>08 | 9.<br>82<br>55<br>4 | 10.<br>.1<br>90<br>89 | 1.6<br>797<br>928<br>51  | 0.7<br>482<br>833<br>33     | 1.6<br>79<br>79<br>28<br>51 | U<br>p           | 0.0<br>06<br>34<br>70<br>73 | 0.9<br>30<br>85<br>92<br>11 |
| 53<br>34       | PLC<br>L1        | Phospholipase C<br>like 1                                                          | 5.<br>14<br>41<br>1 | 4.<br>18<br>98<br>9 | 4.<br>13<br>04<br>3 | 3.<br>45<br>88<br>9   | 4.<br>25<br>30<br>8 | 3.<br>23<br>19        | -1.<br>790<br>281<br>767 | -0.<br>840<br>186<br>667    | 1.7<br>90<br>28<br>17       | D<br>o<br>w<br>n | 0.0<br>41<br>27<br>37       | 0.9<br>30<br>85<br>92       |

|                |                     |                                                                             |                     |                     |                     |                      |                      |                       |                          |                          |                             |                  |                             |                             |
|----------------|---------------------|-----------------------------------------------------------------------------|---------------------|---------------------|---------------------|----------------------|----------------------|-----------------------|--------------------------|--------------------------|-----------------------------|------------------|-----------------------------|-----------------------------|
|                |                     |                                                                             |                     |                     |                     |                      |                      |                       |                          |                          | 67                          |                  | 58                          | 11                          |
| 84<br>98<br>1  | MIR<br>22H<br>G     | MIR22 host gene                                                             | 3.<br>96<br>67<br>9 | 5.<br>09<br>26<br>9 | 4.<br>44<br>37<br>4 | 3.<br>90<br>50<br>6  | 3.<br>82<br>77<br>5  | 3.<br>90<br>26<br>5   | -1.<br>539<br>650<br>966 | -0.<br>622<br>603<br>333 | 1.5<br>39<br>65<br>09<br>66 | D<br>o<br>w<br>n | 0.0<br>44<br>50<br>78<br>08 | 0.9<br>30<br>85<br>92<br>11 |
| 28<br>98<br>4  | RGC<br>C            | Regulator of cell<br>cycle                                                  | 7.<br>03<br>38<br>1 | 7.<br>06<br>18<br>9 | 7.<br>30<br>43<br>4 | 5.<br>28<br>30<br>6  | 5.<br>89<br>48<br>5  | 6.<br>41<br>22<br>1   | -2.<br>411<br>571<br>08  | -1.<br>269<br>973<br>333 | 2.4<br>11<br>57<br>10<br>8  | D<br>o<br>w<br>n | 0.0<br>02<br>03<br>98<br>42 | 0.9<br>30<br>85<br>92<br>11 |
| 55<br>73       | PRK<br>AR1<br>A     | Protein kinase,<br>camp-dependent,<br>regulatory subunit<br>type I $\alpha$ | 5.<br>18<br>73<br>4 | 6.<br>20<br>91<br>2 | 5.<br>96<br>51<br>7 | 5.<br>23<br>40<br>9  | 4.<br>36<br>42<br>2  | 5.<br>13<br>42<br>2   | -1.<br>836<br>560<br>811 | -0.<br>877<br>006<br>667 | 1.8<br>36<br>56<br>08<br>11 | D<br>o<br>w<br>n | 0.0<br>27<br>98<br>98<br>4  | 0.9<br>30<br>85<br>92<br>11 |
| 86<br>11       | PLPP<br>1           | Phospholipid<br>phosphatase 1                                               | 8.<br>12<br>36<br>2 | 8.<br>81<br>16<br>6 | 9.<br>35<br>39<br>2 | 7.<br>65<br>09<br>7  | 7.<br>95<br>66<br>7  | 7.<br>79<br>30<br>7   | -1.<br>949<br>129<br>573 | -0.<br>962<br>83<br>743  | 1.9<br>49<br>12<br>95<br>73 | D<br>o<br>w<br>n | 0.0<br>11<br>84<br>24<br>88 | 0.9<br>30<br>85<br>92<br>11 |
| 72<br>86<br>22 | SKP<br>1P2          | S-phase<br>kinase-associated<br>protein 1<br>pseudogene 2                   | 9.<br>73<br>73<br>7 | 9.<br>68<br>45<br>1 | 9.<br>90<br>28<br>9 | 9.<br>09<br>12<br>65 | 8.<br>73<br>65<br>14 | 9.<br>50<br>14<br>743 | -1.<br>585<br>813<br>743 | -0.<br>665<br>223<br>333 | 1.5<br>85<br>81<br>37<br>43 | D<br>o<br>w<br>n | 0.0<br>11<br>99<br>60<br>31 | 0.9<br>30<br>85<br>92<br>11 |
| 10<br>04<br>22 | LOC<br>1004<br>2273 | Uncharacterized<br>LOC100422737                                             | 7.<br>13<br>93      | 6.<br>74<br>95      | 6.<br>56<br>14      | 7.<br>41<br>61       | 7.<br>60<br>66       | 7.<br>32<br>09        | 1.5<br>487<br>847        | 0.6<br>311<br>366        | 1.5<br>48<br>78             | U<br>p           | 0.0<br>10<br>80             | 0.9<br>30<br>85             |

|    |      |                      |    |    |    |    |    |    |     |     |     |   |     |     |
|----|------|----------------------|----|----|----|----|----|----|-----|-----|-----|---|-----|-----|
| 73 | 7    |                      | 3  | 8  | 1  | 8  | 2  | 3  | 65  | 67  | 47  |   | 32  | 92  |
| 7  |      |                      |    |    |    |    |    |    |     |     | 65  |   | 2   | 11  |
| 39 | LIPA | Lipase A,            | 6. | 7. | 7. | 6. | 5. | 6. | -1. | -0. | 1.8 | D | 0.0 | 0.9 |
| 88 |      | lysosomal acid,      | 55 | 04 | 38 | 42 | 78 | 04 | 880 | 910 | 80  | o | 07  | 30  |
|    |      | cholesterol esterase | 70 | 16 | 11 | 27 | 02 | 41 | 174 | 866 | 17  | w | 95  | 85  |
|    |      |                      | 5  | 2  | 5  | 7  | 7  | 8  | 632 | 667 | 46  | n | 97  | 92  |
|    |      |                      |    |    |    |    |    |    |     |     | 32  |   | 73  | 11  |
| 64 | MRO  | Maestro heat-like    | 6. | 6. | 6. | 7. | 6. | 7. | 1.6 | 0.6 | 1.6 | U | 0.0 | 0.9 |
| 24 | H6   | repeat family        | 51 | 53 | 39 | 39 | 91 | 18 | 033 | 810 | 03  | p | 03  | 30  |
| 75 |      | member 6             | 43 | 04 | 89 | 17 | 43 | 08 | 284 | 7   | 32  |   | 87  | 85  |
|    |      |                      | 9  | 1  | 7  | 3  | 9  | 6  | 51  |     | 84  |   | 33  | 92  |
|    |      |                      |    |    |    |    |    |    |     |     | 51  |   | 38  | 11  |
| 27 | B3G  | B-1,3-glucuronyltr   | 4. | 4. | 4. | 5. | 4. | 5. | 1.6 | 0.7 | 1.6 | U | 0.0 | 0.9 |
| 08 | AT1  | ansferase 1          | 40 | 40 | 20 | 30 | 57 | 27 | 428 | 162 | 42  | p | 10  | 30  |
| 7  |      |                      | 21 | 54 | 39 | 99 | 80 | 22 | 491 |     | 84  |   | 46  | 85  |
|    |      |                      | 7  | 6  | 7  | 3  | 6  | 1  | 33  |     | 91  |   | 78  | 92  |
|    |      |                      |    |    |    |    |    |    |     |     | 33  |   | 48  | 11  |
| 10 | CFL  | Cofilin 1            | 9. | 9. | 10 | 8. | 9. | 9. | -1. | -0. | 1.5 | D | 0.0 | 0.9 |
| 72 | 1    | (non-muscle)         | 63 | 56 | .0 | 95 | 08 | 23 | 568 | 649 | 68  | o | 04  | 30  |
|    |      |                      | 66 | 69 | 24 | 99 | 25 | 77 | 584 | 463 | 58  | w | 80  | 85  |
|    |      |                      | 8  | 2  | 93 | 4  |    |    | 591 | 333 | 45  | n | 71  | 92  |
|    |      |                      |    |    |    |    |    |    |     |     | 91  |   | 01  | 11  |
| 46 | MYB  | Myosin binding       | 4. | 4. | 5. | 4. | 6. | 6. | 2.2 | 1.1 | 2.2 | U | 0.0 | 0.9 |
| 04 | PC1  | protein C, slow      | 29 | 30 | 13 | 80 | 08 | 32 | 418 | 646 | 41  | p | 23  | 30  |
|    |      | type                 | 27 | 04 | 29 | 98 | 54 | 47 | 141 | 666 | 81  |   | 99  | 85  |
|    |      |                      | 4  | 6  | 2  | 8  | 8  | 6  | 27  | 67  | 41  |   | 61  | 92  |
|    |      |                      |    |    |    |    |    |    |     |     | 27  |   | 22  | 11  |
| 11 | C12o | Chromosome 12        | 10 | 10 | 10 | 9. | 10 | 10 | -1. | -0. | 1.5 | D | 0.0 | 0.9 |
| 32 | rf57 | open reading frame   | .6 | .5 | .8 | 72 | .0 | .4 | 506 | 591 | 06  | o | 15  | 30  |

|                           |                          |                                                               |                     |                     |                     |                     |                     |                     |                          |                          |                             |                  |                             |                             |
|---------------------------|--------------------------|---------------------------------------------------------------|---------------------|---------------------|---------------------|---------------------|---------------------|---------------------|--------------------------|--------------------------|-----------------------------|------------------|-----------------------------|-----------------------------|
| 46                        |                          | 57                                                            | 03<br>78            | 29<br>06            | 00<br>3             | 77<br>4             | 07<br>08            | 23<br>38            | 965<br>79                | 646<br>667               | 96<br>57<br>9               | w<br>n           | 74<br>31<br>82              | 85<br>92<br>11              |
| 10<br>53<br>76<br>75<br>2 | LOC<br>1053<br>7675<br>2 | NPIP-like protein 1                                           | 5.<br>15<br>31      | 5.<br>57<br>97      | 6.<br>33<br>36      | 4.<br>89<br>51      | 4.<br>32<br>09      | 5.<br>20<br>72      | -1.<br>841<br>706        | -0.<br>881<br>043        | 1.8<br>41<br>70             | D<br>o<br>w<br>n | 0.0<br>31<br>97<br>36<br>18 | 0.9<br>30<br>85<br>92<br>11 |
| 25<br>95<br>0             | RWD<br>D3                | RWD domain<br>containing 3                                    | 5.<br>89<br>43<br>1 | 5.<br>86<br>80<br>1 | 6.<br>65<br>24<br>5 | 5.<br>37<br>69<br>9 | 5.<br>04<br>31<br>1 | 5.<br>84<br>50<br>5 | -1.<br>643<br>236<br>349 | -0.<br>716<br>54         | 1.6<br>43<br>23<br>63<br>49 | D<br>o<br>w<br>n | 0.0<br>36<br>14<br>35<br>53 | 0.9<br>30<br>85<br>92<br>11 |
| 23<br>40<br>1             | FRA<br>T2                | Frequently<br>rearranged in<br>advanced T-cell<br>lymphomas 2 | 6.<br>81<br>94      | 6.<br>76<br>48<br>7 | 6.<br>80<br>15<br>2 | 5.<br>96<br>80<br>5 | 5.<br>96<br>30<br>7 | 6.<br>57<br>37<br>6 | -1.<br>544<br>318<br>153 | -0.<br>626<br>97         | 1.5<br>44<br>31<br>81<br>53 | D<br>o<br>w<br>n | 0.0<br>13<br>71<br>08       | 0.9<br>30<br>85<br>92<br>11 |
| 22<br>89<br>0             | ZBT<br>B1                | Zinc finger and<br>BTB domain<br>containing 1                 | 4.<br>39<br>24<br>6 | 4.<br>35<br>28<br>3 | 4.<br>63<br>36<br>1 | 5.<br>48<br>73<br>9 | 4.<br>62<br>91<br>3 | 5.<br>10<br>08<br>3 | 1.5<br>292<br>313<br>34  | 0.6<br>128<br>066<br>67  | 1.5<br>29<br>23<br>13<br>34 | U<br>p           | 0.0<br>26<br>29<br>07<br>72 | 0.9<br>30<br>85<br>92<br>11 |
| 23<br>32                  | FMR<br>1                 | Fragile X mental<br>retardation 1                             | 4.<br>70<br>97<br>9 | 5.<br>04<br>85<br>2 | 5.<br>69<br>06<br>5 | 4.<br>63<br>88<br>9 | 4.<br>28<br>3<br>9  | 4.<br>59<br>85<br>3 | -1.<br>561<br>407<br>026 | -0.<br>642<br>846<br>667 | 1.5<br>61<br>40<br>70<br>26 | D<br>o<br>w<br>n | 0.0<br>35<br>67<br>27<br>93 | 0.9<br>30<br>85<br>92<br>11 |
| 27                        | TNF                      | Tumor necrosis                                                | 9.                  | 9.                  | 9.                  | 10                  | 9.                  | 9.                  | 1.5                      | 0.5                      | 1.5                         | U                | 0.0                         | 0.9                         |

|    |      |                    |    |    |    |    |    |    |     |     |     |   |     |     |
|----|------|--------------------|----|----|----|----|----|----|-----|-----|-----|---|-----|-----|
| 24 | RSF2 | factor receptor    | 64 | 46 | 48 | .4 | 98 | 95 | 111 | 956 | 111 | p | 07  | 30  |
| 2  | 1    | superfamily        | 75 | 49 | 91 | 48 | 80 | 17 | 812 | 766 | 81  |   | 83  | 85  |
|    |      | member 21          | 4  | 8  | 6  | 92 | 5  | 4  | 08  | 67  | 20  |   | 75  | 92  |
|    |      |                    |    |    |    |    |    |    |     |     | 8   |   | 09  | 11  |
| 55 | SRG  | Serglycin          | 7. | 8. | 7. | 6. | 7. | 7. | -2. | -1. | 2.2 | D | 0.0 | 0.9 |
| 52 | N    |                    | 44 | 81 | 97 | 63 | 02 | 13 | 212 | 145 | 12  | o | 09  | 30  |
|    |      |                    | 18 | 16 | 40 | 66 | 39 | 08 | 038 | 376 | 03  | w | 64  | 85  |
|    |      |                    | 5  | 5  | 1  | 1  | 3  | 4  | 762 | 667 | 87  | n | 58  | 92  |
|    |      |                    |    |    |    |    |    |    |     |     | 62  |   | 41  | 11  |
| 87 | ADA  | ADAM               | 6. | 6. | 7. | 6. | 5. | 6. | -1. | -0. | 1.6 | D | 0.0 | 0.9 |
| 54 | M9   | metallopeptidase   | 62 | 53 | 20 | 23 | 61 | 24 | 693 | 760 | 93  | o | 17  | 30  |
|    |      | domain 9           | 47 | 94 | 63 | 51 | 03 | 43 | 764 | 233 | 76  | w | 41  | 85  |
|    |      |                    |    | 5  | 4  | 3  | 1  | 5  | 542 | 333 | 45  | n | 51  | 92  |
|    |      |                    |    |    |    |    |    |    |     |     | 42  |   | 34  | 11  |
| 20 | ENG  | Endoglin           | 6. | 6. | 7. | 4. | 6. | 6. | -2. | -1. | 2.1 | D | 0.0 | 0.9 |
| 22 |      |                    | 26 | 64 | 42 | 73 | 33 | 01 | 121 | 085 | 21  | o | 43  | 30  |
|    |      |                    | 98 | 57 | 56 | 81 | 45 | 30 | 620 | 166 | 62  | w | 97  | 85  |
|    |      |                    |    | 3  | 9  | 3  | 4  | 5  | 568 | 667 | 05  | n | 10  | 92  |
|    |      |                    |    |    |    |    |    |    |     |     | 68  |   | 27  | 11  |
| 78 | CAC  | Calcium channel,   | 4. | 5. | 5. | 3. | 4. | 4. | -2. | -1. | 2.2 | D | 0.0 | 0.9 |
| 3  | NB2  | voltage-dependent, | 81 | 33 | 61 | 52 | 53 | 12 | 286 | 192 | 86  | o | 04  | 30  |
|    |      | $\beta$ 2 subunit  | 55 | 75 | 80 | 93 | 99 | 34 | 007 | 83  | 00  | w | 12  | 85  |
|    |      |                    | 8  | 7  | 3  | 4  | 1  | 4  | 283 |     | 72  | n | 64  | 92  |
|    |      |                    |    |    |    |    |    |    |     |     | 83  |   | 59  | 11  |
| 42 | MEI  | Meis homeobox 1    | 5. | 6. | 6. | 4. | 5. | 5. | -1. | -0. | 1.7 | D | 0.0 | 0.9 |
| 11 | S1   |                    | 66 | 07 | 84 | 87 | 72 | 57 | 748 | 805 | 48  | o | 46  | 30  |
|    |      |                    | 76 | 91 | 94 | 83 | 37 | 65 | 171 | 846 | 17  | w | 50  | 85  |
|    |      |                    | 8  | 2  | 7  | 8  | 7  | 8  | 431 | 667 | 14  | n | 13  | 92  |
|    |      |                    |    |    |    |    |    |    |     |     | 31  |   | 82  | 11  |

|    |      |                         |    |    |    |    |    |    |     |     |     |   |     |     |
|----|------|-------------------------|----|----|----|----|----|----|-----|-----|-----|---|-----|-----|
| 10 | LOC  | HLA class II            | 10 | 10 | 11 | 9. | 10 | 9. | -1. | -0. | 1.9 | D | 0.0 | 0.9 |
| 53 | 1053 | histocompatibility      | .1 | .2 | .0 | 24 | .0 | 22 | 941 | 956 | 411 | o | 16  | 30  |
| 69 | 6923 | antigen, DRB1-7 $\beta$ | 20 | 33 | 53 | 28 | 67 | 63 | 111 | 883 | 11  | w | 70  | 85  |
| 23 | 0    | chain                   | 15 | 12 | 67 | 4  | 13 | 2  | 961 | 333 | 96  | n | 42  | 92  |
| 0  |      |                         |    |    |    |    |    |    |     |     | 1   |   | 06  | 11  |
| 83 | TMT  | Transmembrane           | 6. | 6. | 6. | 5. | 6. | 5. | -1. | -0. | 1.7 | D | 0.0 | 0.9 |
| 85 | C1   | and                     | 45 | 55 | 72 | 31 | 46 | 58 | 731 | 791 | 31  | o | 26  | 30  |
| 7  |      | tetratricopeptide       | 74 | 95 | 42 | 79 | 64 | 18 | 073 | 666 | 07  | w | 64  | 85  |
|    |      | repeat containing 1     | 8  | 2  | 8  | 2  | 8  | 8  | 122 | 667 | 31  | n | 59  | 92  |
|    |      |                         |    |    |    |    |    |    |     |     | 22  |   | 68  | 11  |
| 23 | EPB  | Erythrocyte             | 4. | 4. | 5. | 3. | 3. | 4. | -1. | -0. | 1.7 | D | 0.0 | 0.9 |
| 13 | 41L3 | membrane protein        | 16 | 30 | 21 | 59 | 60 | 09 | 732 | 792 | 32  | o | 25  | 30  |
| 6  |      | band 4.1-like 3         | 11 | 19 | 45 | 42 | 66 | 79 | 549 | 896 | 54  | w | 84  | 85  |
|    |      |                         | 5  | 5  | 2  | 7  | 8  | 8  | 614 | 667 | 96  | n | 90  | 92  |
|    |      |                         |    |    |    |    |    |    |     |     | 14  |   | 23  | 11  |
| 94 | MED  | Mediator complex        | 5. | 5. | 6. | 5. | 4. | 5. | -1. | -0. | 1.5 | D | 0.0 | 0.9 |
| 12 | 21   | subunit 21              | 76 | 82 | 29 | 52 | 93 | 60 | 524 | 608 | 24  | o | 32  | 30  |
|    |      |                         | 63 | 97 | 47 | 97 | 16 | 33 | 881 | 696 | 88  | w | 67  | 85  |
|    |      |                         | 6  | 2  | 7  | 4  | 4  | 8  | 006 | 667 | 10  | n | 98  | 92  |
|    |      |                         |    |    |    |    |    |    |     |     | 06  |   | 78  | 11  |
| 47 | GIM  | Gtpase, IMAP            | 5. | 5. | 5. | 4. | 4. | 5. | -1. | -0. | 1.6 | D | 0.0 | 0.9 |
| 43 | AP6  | family member 6         | 40 | 37 | 99 | 62 | 53 | 51 | 619 | 695 | 19  | o | 48  | 30  |
| 44 |      |                         | 14 | 02 | 23 | 75 | 77 | 27 | 262 | 336 | 26  | w | 14  | 85  |
|    |      |                         | 6  | 8  | 5  | 8  | 1  | 9  | 259 | 667 | 22  | n | 68  | 92  |
|    |      |                         |    |    |    |    |    |    |     |     | 59  |   | 02  | 11  |
| 55 | PRK  | Protein kinase,         | 5. | 5. | 5. | 4. | 5. | 3. | -1. | -0. | 1.8 | D | 0.0 | 0.9 |
| 92 | G1   | cgmp-dependent,         | 37 | 70 | 40 | 71 | 25 | 93 | 815 | 860 | 15  | o | 26  | 30  |
|    |      | type I                  | 10 | 30 | 99 | 23 | 58 | 35 | 990 | 756 | 99  | w | 05  | 85  |
|    |      |                         | 4  | 3  | 8  | 7  | 4  | 7  | 514 | 667 | 05  | n | 34  | 92  |

|                |                    |                                                       |                     |                     |                     |                     |                     |                     |                          |                          |                             |                  |                             |                             |
|----------------|--------------------|-------------------------------------------------------|---------------------|---------------------|---------------------|---------------------|---------------------|---------------------|--------------------------|--------------------------|-----------------------------|------------------|-----------------------------|-----------------------------|
|                |                    |                                                       |                     |                     |                     |                     |                     |                     |                          |                          | 14                          |                  | 38                          | 11                          |
| 78<br>05       | LAP<br>TM5         | Lysosomal protein<br>transmembrane 5                  | 8.<br>11<br>75<br>1 | 8.<br>30<br>44      | 8.<br>30<br>53      | 6.<br>85<br>67<br>3 | 7.<br>64<br>51<br>6 | 7.<br>82<br>60<br>4 | -1.<br>740<br>811<br>509 | -0.<br>799<br>76         | 1.7<br>40<br>81<br>15<br>09 | D<br>o<br>w<br>n | 0.0<br>14<br>37<br>85<br>69 | 0.9<br>30<br>85<br>92<br>11 |
| 51<br>70<br>5  | EMC<br>N           | Endomucin                                             | 5.<br>46<br>15<br>9 | 6.<br>41<br>48<br>1 | 6.<br>86<br>92<br>2 | 4.<br>69<br>86<br>2 | 4.<br>86<br>02<br>3 | 5.<br>81<br>84<br>2 | -2.<br>177<br>666<br>96  | -1.<br>122<br>783<br>333 | 2.1<br>77<br>66<br>69<br>6  | D<br>o<br>w<br>n | 0.0<br>27<br>62<br>33<br>74 | 0.9<br>30<br>85<br>92<br>11 |
| 64<br>29<br>46 | FLV<br>CR1-<br>AS1 | FLVCR1 antisense<br>RNA 1 (head to<br>head)           | 6.<br>39<br>43<br>3 | 6.<br>73<br>09<br>4 | 6.<br>65<br>45<br>4 | 7.<br>76<br>77<br>6 | 7.<br>44<br>75<br>4 | 7.<br>41<br>68<br>7 | 1.9<br>329<br>263<br>48  | 0.9<br>507<br>866<br>67  | 1.9<br>32<br>92<br>63<br>48 | U<br>p           | 0.0<br>00<br>59<br>76<br>36 | 0.9<br>30<br>85<br>92<br>11 |
| 10<br>78<br>8  | IQG<br>AP2         | IQ motif<br>containing gtpase<br>activating protein 2 | 5.<br>53<br>33<br>8 | 5.<br>44<br>81<br>9 | 5.<br>40<br>99<br>8 | 4.<br>89<br>31<br>9 | 3.<br>93<br>15<br>8 | 4.<br>76<br>03<br>5 | -1.<br>912<br>522<br>429 | -0.<br>935<br>476<br>667 | 1.9<br>12<br>52<br>24<br>29 | D<br>o<br>w<br>n | 0.0<br>06<br>20<br>95<br>45 | 0.9<br>30<br>85<br>92<br>11 |
| 55<br>75<br>4  | TME<br>M30<br>A    | Transmembrane<br>protein 30A                          | 4.<br>99<br>57<br>7 | 4.<br>91<br>99<br>3 | 5.<br>77<br>98<br>9 | 4.<br>84<br>85<br>9 | 4.<br>05<br>56<br>7 | 4.<br>32<br>33<br>9 | -1.<br>768<br>647<br>655 | -0.<br>822<br>646<br>667 | 1.7<br>68<br>64<br>76<br>55 | D<br>o<br>w<br>n | 0.0<br>21<br>67<br>39<br>19 | 0.9<br>30<br>85<br>92<br>11 |
| 55<br>18       | PPP2<br>R1A        | Protein<br>phosphatase 2<br>regulatory subunit        | 6.<br>83<br>72      | 7.<br>40<br>90      | 7.<br>37<br>50      | 6.<br>77<br>48      | 6.<br>32<br>43      | 6.<br>72<br>81      | -1.<br>513<br>672        | -0.<br>598<br>053        | 1.5<br>13<br>67             | D<br>o<br>w      | 0.0<br>24<br>23             | 0.9<br>30<br>85             |

|    |      |                     |    |    |    |    |    |    |     |     |     |   |     |     |
|----|------|---------------------|----|----|----|----|----|----|-----|-----|-----|---|-----|-----|
|    |      | A, $\alpha$         | 8  | 3  | 8  | 1  |    | 2  | 749 | 333 | 27  | n | 69  | 92  |
|    |      |                     |    |    |    |    |    |    |     |     | 49  |   | 49  | 11  |
| 26 | GBP  | Guanylate binding   | 6. | 7. | 6. | 5. | 6. | 6. | -1. | -0. | 1.8 | D | 0.0 | 0.9 |
| 34 | 2    | protein 2,          | 98 | 19 | 66 | 34 | 14 | 68 | 860 | 895 | 60  | o | 27  | 30  |
|    |      | interferon-inducibl | 99 | 15 | 99 | 22 | 1  | 08 | 611 | 776 | 61  | w | 49  | 85  |
|    |      | e                   | 9  |    | 4  | 8  |    | 2  | 265 | 667 | 12  | n | 85  | 92  |
|    |      |                     |    |    |    |    |    |    |     |     | 65  |   | 52  | 11  |
| 28 | ACA  | Acyl-coa            | 5. | 5. | 5. | 4. | 4. | 5. | -1. | -0. | 1.5 | D | 0.0 | 0.9 |
| 97 | D9   | dehydrogenase       | 34 | 36 | 48 | 68 | 65 | 02 | 528 | 612 | 28  | o | 04  | 30  |
| 6  |      | family member 9     | 69 | 69 | 91 | 43 | 95 | 30 | 404 | 026 | 40  | w | 08  | 85  |
|    |      |                     | 2  | 8  | 9  | 6  | 6  | 9  | 771 | 667 | 47  | n | 75  | 92  |
|    |      |                     |    |    |    |    |    |    |     |     | 71  |   | 42  | 11  |
| 51 | UPB  | Ureidopropionase,   | 5. | 4. | 3. | 5. | 5. | 5. | 2.0 | 1.0 | 2.0 | U | 0.0 | 0.9 |
| 73 | 1    | $\beta$             | 09 | 32 | 94 | 52 | 18 | 70 | 218 | 157 | 21  | p | 09  | 30  |
| 3  |      |                     | 26 | 42 | 34 | 04 | 34 | 35 | 883 | 033 | 88  |   | 27  | 85  |
|    |      |                     | 9  |    | 2  | 7  | 3  | 2  | 51  | 33  | 83  |   | 73  | 92  |
|    |      |                     |    |    |    |    |    |    |     |     | 51  |   | 43  | 11  |
| 79 | FA2  | Fatty acid          | 8. | 8. | 8. | 9. | 8. | 8. | 1.5 | 0.6 | 1.5 | U | 0.0 | 0.9 |
| 15 | H    | 2-hydroxylase       | 41 | 00 | 18 | 39 | 52 | 53 | 407 | 236 | 40  | p | 42  | 30  |
| 2  |      |                     | 05 | 41 | 08 | 93 | 86 | 85 | 754 | 566 | 77  |   | 54  | 85  |
|    |      |                     | 3  | 9  | 1  | 1  | 2  | 7  | 99  | 67  | 54  |   | 32  | 92  |
|    |      |                     |    |    |    |    |    |    |     |     | 99  |   | 31  | 11  |
| 19 | EDN  | Endothelin receptor | 5. | 6. | 6. | 4. | 5. | 4. | -2. | -1. | 2.3 | D | 0.0 | 0.9 |
| 09 | RA   | type A              | 77 | 33 | 73 | 42 | 72 | 90 | 393 | 259 | 93  | o | 09  | 30  |
|    |      |                     | 38 | 44 | 03 | 79 | 37 | 9  | 817 | 313 | 81  | w | 13  | 85  |
|    |      |                     | 6  | 2  | 8  | 5  | 7  |    | 774 | 333 | 77  | n | 36  | 92  |
|    |      |                     |    |    |    |    |    |    |     |     | 74  |   | 99  | 11  |
| 16 | CITE | Cbp/p300-interacti  | 7. | 7. | 7. | 8. | 7. | 8. | 1.5 | 0.6 | 1.5 | U | 0.0 | 0.9 |
| 37 | D4   | ng transactivator,  | 62 | 70 | 70 | 74 | 84 | 25 | 236 | 075 | 23  | p | 29  | 30  |



|    |      |                                                                |               |               |               |               |               |               |                   |                   |                      |             |                      |                      |
|----|------|----------------------------------------------------------------|---------------|---------------|---------------|---------------|---------------|---------------|-------------------|-------------------|----------------------|-------------|----------------------|----------------------|
| 32 |      | with Glu/Asp rich<br>carboxy-terminal<br>domain, 4             | 22<br>5       | 36            | 18<br>2       | 70<br>5       | 62<br>5       | 70<br>5       | 800<br>6          | 6<br>6            | 68<br>00<br>6        |             | 31<br>03<br>66       | 85<br>92<br>11       |
| 73 | UQC  | Ubiquinol-cytochro                                             | 9.            | 8.            | 9.            | 8.            | 8.            | 8.            | -1.               | -0.               | 1.6                  | D           | 0.0                  | 0.9                  |
| 84 | RC1  | me c reductase core<br>protein I                               | 13<br>44<br>2 | 94<br>21<br>5 | 31<br>34<br>7 | 51<br>87<br>1 | 08<br>97<br>8 | 60<br>96<br>8 | 651<br>705<br>718 | 723<br>956<br>667 | 51<br>70<br>57       | o<br>w<br>n | 04<br>77<br>63       | 30<br>85<br>92<br>11 |
| 26 | STE  | STEAP2                                                         | 7.            | 6.            | 7.            | 7.            | 7.            | 7.            | 1.5               | 0.5               | 1.5                  | U           | 0.0                  | 0.9                  |
| 17 | AP2  | metalloreductase                                               | 00            | 49            | 15            | 38            | 78            | 24            | 007               | 857               | 00                   | p           | 33                   | 30                   |
| 29 |      |                                                                | 50<br>8       | 19<br>4       | 20<br>6       | 31<br>1       |               | 31<br>1       | 808<br>59         | 133<br>33         | 78<br>08<br>59       |             | 41<br>92<br>8        | 85<br>92<br>11       |
| 48 | NOV  | Nephroblastoma                                                 | 4.            | 4.            | 4.            | 4.            | 4.            | 3.            | -1.               | -0.               | 1.5                  | D           | 0.0                  | 0.9                  |
| 56 |      | overexpressed                                                  | 53<br>88<br>1 | 52<br>96      | 94<br>09<br>3 | 02<br>49<br>2 | 28<br>44<br>4 | 86<br>36<br>8 | 528<br>482<br>463 | 612<br>1          | 28<br>48<br>24<br>63 | o<br>w<br>n | 07<br>74<br>99<br>07 | 30<br>85<br>92<br>11 |
| 64 | NPIP | Nuclear pore                                                   | 5.            | 5.            | 6.            | 4.            | 4.            | 5.            | -1.               | -0.               | 1.8                  | D           | 0.0                  | 0.9                  |
| 27 | A2   | complex                                                        | 15            | 57            | 33            | 89            | 32            | 20            | 841               | 881               | 41                   | o           | 31                   | 30                   |
| 99 |      | interacting protein<br>family member A2                        | 31<br>5       | 97<br>5       | 36<br>7       | 51<br>7       | 09<br>7       | 72<br>5       | 706<br>712        | 043<br>333        | 70<br>67             | w<br>n      | 97<br>36             | 85<br>92<br>11       |
| 86 | SLC  | Solute carrier                                                 | 4.            | 5.            | 6.            | 5.            | 3.            | 4.            | -2.               | -1.               | 2.4                  | D           | 0.0                  | 0.9                  |
| 71 | 4A4  | family 4 (sodium<br>bicarbonate<br>cotransporter),<br>member 4 | 72<br>67      | 91<br>45<br>9 | 18<br>92<br>9 | 32<br>86<br>3 | 51<br>23<br>1 | 19<br>22<br>9 | 404<br>577<br>347 | 265<br>783<br>333 | 04<br>57<br>73<br>47 | o<br>w<br>n | 41<br>55<br>36<br>93 | 30<br>85<br>92<br>11 |
| 79 | MM   | Multimerin 2                                                   | 5.            | 5.            | 6.            | 4.            | 5.            | 5.            | -1.               | -0.               | 1.5                  | D           | 0.0                  | 0.9                  |

|    |      |                      |    |    |    |    |    |    |     |     |     |   |     |     |
|----|------|----------------------|----|----|----|----|----|----|-----|-----|-----|---|-----|-----|
| 81 | RN2  |                      | 55 | 60 | 11 | 67 | 17 | 52 | 553 | 635 | 53  | o | 38  | 30  |
| 2  |      |                      | 32 | 53 | 75 | 05 | 91 | 02 | 382 | 413 | 38  | w | 54  | 85  |
|    |      |                      | 1  | 7  | 1  |    |    | 5  | 732 | 333 | 27  | n | 09  | 92  |
|    |      |                      |    |    |    |    |    |    |     |     | 32  |   | 85  | 11  |
| 14 | CTN  | Cystinosin,          | 4. | 4. | 3. | 4. | 5. | 4. | 1.6 | 0.7 | 1.6 | U | 0.0 | 0.9 |
| 97 | S    | lysosomal cystine    | 91 | 11 | 69 | 97 | 15 | 73 | 379 | 118 | 37  | p | 43  | 30  |
|    |      | transporter          | 13 | 59 | 79 | 38 | 44 | 25 | 030 | 5   | 90  |   | 76  | 85  |
|    |      |                      | 6  | 9  | 5  | 5  | 2  | 8  | 91  |     | 30  |   | 09  | 92  |
|    |      |                      |    |    |    |    |    |    |     |     | 91  |   | 05  | 11  |
| 23 | NM   | Nicotinamide         | 5. | 5. | 6. | 4. | 5. | 4. | -2. | -1. | 2.3 | D | 0.0 | 0.9 |
| 05 | NAT  | nucleotide           | 04 | 82 | 55 | 38 | 10 | 24 | 349 | 232 | 49  | o | 14  | 30  |
| 7  | 2    | adenyltransferase    | 73 | 60 | 93 | 70 | 31 | 54 | 483 | 343 | 48  | w | 26  | 85  |
|    |      | 2                    | 4  | 5  |    | 5  | 2  | 9  | 007 | 333 | 30  | n | 92  | 92  |
|    |      |                      |    |    |    |    |    |    |     |     | 07  |   | 99  | 11  |
| 62 | RYR  | Ryanodine receptor   | 3. | 4. | 5. | 2. | 4. | 3. | -2. | -1. | 2.1 | D | 0.0 | 0.9 |
| 62 | 2    | 2 (cardiac)          | 96 | 40 | 04 | 66 | 12 | 21 | 187 | 129 | 87  | o | 22  | 30  |
|    |      |                      | 22 | 07 | 19 | 94 | 79 | 96 | 556 | 32  | 55  | w | 40  | 85  |
|    |      |                      | 9  | 5  |    | 1  | 3  | 4  | 077 |     | 60  | n | 03  | 92  |
|    |      |                      |    |    |    |    |    |    |     |     | 77  |   | 42  | 11  |
| 69 | BTG  | B-cell translocation | 10 | 11 | 10 | 10 | 9. | 9. | -1. | -0. | 1.8 | D | 0.0 | 0.9 |
| 4  | 1    | gene 1,              | .9 | .0 | .1 | .1 | 66 | 70 | 855 | 891 | 55  | o | 08  | 30  |
|    |      | anti-proliferative   | 86 | 27 | 64 | 31 | 68 | 61 | 361 | 7   | 36  | w | 73  | 85  |
|    |      |                      | 63 | 83 | 69 | 02 | 8  | 5  | 101 |     | 11  | n | 87  | 92  |
|    |      |                      |    |    |    |    |    |    |     |     | 01  |   | 78  | 11  |
| 10 | NPIP | Nuclear pore         | 5. | 5. | 6. | 4. | 4. | 5. | -1. | -0. | 1.8 | D | 0.0 | 0.9 |
| 02 | A5   | complex              | 15 | 57 | 33 | 89 | 32 | 20 | 841 | 881 | 41  | o | 31  | 30  |
| 88 |      | interacting protein  | 31 | 97 | 36 | 51 | 09 | 72 | 706 | 043 | 70  | w | 97  | 85  |
| 33 |      | family member A5     |    | 5  |    | 7  |    | 5  | 712 | 333 | 67  | n | 36  | 92  |
| 2  |      |                      |    |    |    |    |    |    |     |     | 12  |   | 18  | 11  |

|                |            |                                                 |                     |                     |                     |                     |                     |                     |                          |                          |                             |                  |                             |                             |
|----------------|------------|-------------------------------------------------|---------------------|---------------------|---------------------|---------------------|---------------------|---------------------|--------------------------|--------------------------|-----------------------------|------------------|-----------------------------|-----------------------------|
| 17<br>97       | DXO        | Decapping<br>exoribonuclease                    | 7.<br>43<br>71<br>8 | 7.<br>63<br>00<br>7 | 8.<br>36<br>60<br>6 | 6.<br>28<br>72<br>7 | 7.<br>48<br>28<br>7 | 6.<br>36<br>95<br>3 | -2.<br>140<br>433<br>974 | -1.<br>097<br>903<br>333 | 2.1<br>40<br>43<br>39<br>74 | D<br>o<br>w<br>n | 0.0<br>18<br>87<br>29<br>42 | 0.9<br>30<br>85<br>92<br>11 |
| 99<br>48       | WD<br>R1   | WD repeat domain<br>1                           | 4.<br>96<br>08<br>8 | 5.<br>14<br>35<br>6 | 5.<br>67<br>30<br>2 | 4.<br>52<br>31<br>7 | 4.<br>42<br>19<br>2 | 4.<br>56<br>29<br>2 | -1.<br>689<br>367<br>654 | -0.<br>756<br>483<br>333 | 1.6<br>89<br>36<br>76<br>54 | D<br>o<br>w<br>n | 0.0<br>05<br>37<br>06<br>45 | 0.9<br>30<br>85<br>92<br>11 |
| 28<br>73<br>8  | TRA<br>J17 | T cell receptor $\alpha$<br>joining 17          | 7.<br>52<br>97<br>9 | 7.<br>71<br>63<br>8 | 7.<br>94<br>6<br>3  | 6.<br>34<br>80<br>3 | 6.<br>65<br>49<br>6 | 7.<br>71<br>79<br>6 | -1.<br>769<br>988<br>516 | -0.<br>823<br>74<br>85   | 1.7<br>69<br>98<br>85<br>16 | D<br>o<br>w<br>n | 0.0<br>42<br>37<br>23<br>06 | 0.9<br>30<br>85<br>92<br>11 |
| 49<br>53       | ODC<br>1   | Ornithine<br>decarboxylase 1                    | 8.<br>51<br>78<br>9 | 9.<br>09<br>98<br>2 | 9.<br>02<br>15<br>1 | 8.<br>44<br>52<br>1 | 7.<br>85<br>45<br>8 | 8.<br>37<br>17<br>2 | -1.<br>575<br>602<br>197 | -0.<br>655<br>903<br>333 | 1.5<br>75<br>60<br>21<br>97 | D<br>o<br>w<br>n | 0.0<br>20<br>19<br>26<br>42 | 0.9<br>30<br>85<br>92<br>11 |
| 40<br>05<br>06 | KNO<br>P1  | Lysine-rich<br>nucleolar protein 1              | 7.<br>70<br>46<br>3 | 6.<br>92<br>66<br>1 | 6.<br>44<br>79<br>4 | 7.<br>80<br>59<br>7 | 8.<br>24<br>42<br>2 | 7.<br>58<br>57<br>8 | 1.8<br>053<br>309<br>5   | 0.8<br>522<br>633<br>33  | 1.8<br>05<br>33<br>09<br>5  | U<br>p           | 0.0<br>32<br>26<br>50<br>6  | 0.9<br>30<br>85<br>92<br>11 |
| 11<br>95<br>87 | CPX<br>M2  | Carboxypeptidase<br>X (M14 family),<br>member 2 | 5.<br>39<br>76<br>7 | 6.<br>24<br>69<br>7 | 5.<br>19<br>84<br>1 | 6.<br>38<br>26<br>5 | 7.<br>18<br>76<br>4 | 7.<br>20<br>47<br>7 | 2.4<br>805<br>671<br>29  | 1.3<br>106<br>7<br>71    | 2.4<br>80<br>56<br>71       | U<br>p           | 0.0<br>04<br>65<br>11       | 0.9<br>30<br>85<br>92       |

|               |                   |                                                                 |                     |                     |                     |                     |                     |                     |                          |                          |                             |                  |                             |                             |
|---------------|-------------------|-----------------------------------------------------------------|---------------------|---------------------|---------------------|---------------------|---------------------|---------------------|--------------------------|--------------------------|-----------------------------|------------------|-----------------------------|-----------------------------|
|               |                   |                                                                 |                     |                     |                     |                     |                     |                     |                          |                          | 29                          |                  | 81                          | 11                          |
| 89<br>10      | SGC<br>E          | Sarcoglycan<br>epsilon                                          | 7.<br>51<br>90<br>4 | 8.<br>06<br>96<br>1 | 7.<br>84<br>76<br>2 | 6.<br>99<br>54<br>4 | 7.<br>16<br>72<br>9 | 7.<br>26<br>62<br>3 | -1.<br>590<br>084<br>388 | -0.<br>669<br>103<br>333 | 1.5<br>90<br>08<br>43<br>88 | D<br>o<br>w<br>n | 0.0<br>06<br>68<br>34<br>13 | 0.9<br>30<br>85<br>92<br>11 |
| 19<br>75      | EIF4<br>B         | Eukaryotic<br>translation<br>initiation factor 4B               | 7.<br>51<br>15<br>7 | 7.<br>79<br>91<br>8 | 8.<br>08<br>21<br>6 | 7.<br>34<br>11<br>4 | 6.<br>52<br>97<br>8 | 7.<br>38<br>57<br>6 | -1.<br>638<br>160<br>447 | -0.<br>712<br>076<br>667 | 1.6<br>38<br>16<br>04<br>47 | D<br>o<br>w<br>n | 0.0<br>29<br>62<br>06<br>64 | 0.9<br>30<br>85<br>92<br>11 |
| 88<br>39      | WIS<br>P2         | WNT1 inducible<br>signaling pathway<br>protein 2                | 4.<br>45<br>58<br>9 | 6.<br>03<br>00<br>7 | 4.<br>83<br>91<br>5 | 6.<br>99<br>35<br>4 | 6.<br>94<br>56<br>1 | 8.<br>36<br>27<br>1 | 5.0<br>126<br>841<br>53  | 2.3<br>255<br>833<br>33  | 5.0<br>12<br>68<br>41<br>53 | U<br>p           | 0.0<br>01<br>83<br>66<br>36 | 0.9<br>30<br>85<br>92<br>11 |
| 23<br>00<br>8 | KLH<br>DC1<br>0   | Kelch domain<br>containing 10                                   | 5.<br>50<br>37<br>2 | 5.<br>58<br>61<br>7 | 6.<br>07<br>83<br>1 | 5.<br>25<br>25<br>5 | 4.<br>33<br>29<br>3 | 5.<br>08<br>22<br>3 | -1.<br>782<br>011<br>524 | -0.<br>833<br>506<br>667 | 1.7<br>82<br>01<br>15<br>24 | D<br>o<br>w<br>n | 0.0<br>16<br>50<br>08<br>02 | 0.9<br>30<br>85<br>92<br>11 |
| 10<br>13<br>0 | PDI<br>A6         | Protein disulfide<br>isomerase family A<br>member 6             | 9.<br>08<br>64<br>8 | 8.<br>92<br>01<br>5 | 9.<br>38<br>62<br>2 | 8.<br>48<br>86<br>3 | 8.<br>26<br>76<br>3 | 8.<br>84<br>63<br>5 | -1.<br>512<br>312<br>9   | -0.<br>596<br>756<br>667 | 1.5<br>12<br>31<br>29       | D<br>o<br>w<br>n | 0.0<br>17<br>42<br>17<br>07 | 0.9<br>30<br>85<br>92<br>11 |
| 81<br>84<br>9 | ST6<br>GAL<br>NAC | ST6<br>( $\alpha$ -N-acetyl-neura<br>minyl-2,3- $\beta$ -galact | 3.<br>90<br>54      | 5.<br>60<br>07      | 6.<br>12<br>84      | 3.<br>54<br>69      | 4.<br>47<br>68      | 3.<br>66<br>65      | -2.<br>487<br>649        | -1.<br>314<br>783        | 2.4<br>87<br>64             | D<br>o<br>w      | 0.0<br>42<br>88             | 0.9<br>30<br>85             |

|    |      |                                                                                 |    |    |    |    |    |    |     |     |     |   |     |     |
|----|------|---------------------------------------------------------------------------------|----|----|----|----|----|----|-----|-----|-----|---|-----|-----|
|    | 5    | osyl-1,3)-N-acetylgl<br>alactosaminide<br>$\alpha$ -2,6-sialyltransfer<br>ase 5 | 8  | 9  | 3  | 7  |    | 8  | 679 | 333 | 96  | n | 11  | 92  |
|    |      |                                                                                 |    |    |    |    |    |    |     |     | 79  |   | 61  | 11  |
| 40 | LUM  | Lumican                                                                         | 9. | 9. | 9. | 7. | 9. | 9. | -1. | -0. | 1.8 | D | 0.0 | 0.9 |
| 60 |      |                                                                                 | 75 | 83 | 77 | 94 | 40 | 30 | 867 | 900 | 67  | o | 38  | 30  |
|    |      |                                                                                 | 53 | 51 | 13 | 61 | 99 | 32 | 088 | 79  | 08  | w | 65  | 85  |
|    |      |                                                                                 |    | 9  | 2  | 8  | 7  | 9  | 095 |     | 80  | n | 27  | 92  |
|    |      |                                                                                 |    |    |    |    |    |    |     |     | 95  |   | 86  | 11  |
| 22 | FBN  | Fibrillin 1                                                                     | 3. | 3. | 2. | 3. | 5. | 4. | 2.5 | 1.3 | 2.5 | U | 0.0 | 0.9 |
| 00 | 1    |                                                                                 | 78 | 34 | 78 | 87 | 73 | 36 | 493 | 501 | 49  | p | 21  | 30  |
|    |      |                                                                                 | 69 | 65 | 42 | 27 | 37 | 16 | 274 | 166 | 32  |   | 08  | 85  |
|    |      |                                                                                 | 7  | 5  | 7  | 3  | 4  | 7  | 03  | 67  | 74  |   | 37  | 92  |
|    |      |                                                                                 |    |    |    |    |    |    |     |     | 03  |   | 98  | 11  |
| 21 | ESR  | Estrogen-related                                                                | 4. | 4. | 4. | 3. | 3. | 3. | -1. | -0. | 1.8 | D | 0.0 | 0.9 |
| 04 | RG   | receptor $\gamma$                                                               | 34 | 68 | 63 | 77 | 51 | 80 | 811 | 857 | 11  | o | 00  | 30  |
|    |      |                                                                                 | 25 | 99 | 09 | 28 | 76 | 13 | 514 | 196 | 51  | w | 42  | 85  |
|    |      |                                                                                 | 2  | 8  | 2  | 9  | 3  | 1  | 893 | 667 | 48  | n | 61  | 92  |
|    |      |                                                                                 |    |    |    |    |    |    |     |     | 93  |   | 58  | 11  |
| 40 | CAP  | Cell cycle                                                                      | 6. | 6. | 7. | 6. | 5. | 6. | -1. | -0. | 1.5 | D | 0.0 | 0.9 |
| 76 | RIN1 | associated protein                                                              | 63 | 84 | 36 | 51 | 94 | 53 | 533 | 617 | 33  | o | 38  | 30  |
|    |      | 1                                                                               | 94 | 26 | 28 | 33 | 03 | 93 | 969 | 27  | 96  | w | 84  | 85  |
|    |      |                                                                                 | 5  | 2  | 1  | 3  | 6  | 8  | 715 |     | 97  | n | 99  | 92  |
|    |      |                                                                                 |    |    |    |    |    |    |     |     | 15  |   | 8   | 11  |
| 22 | FOX  | Forkhead box F1                                                                 | 6. | 7. | 8. | 5. | 7. | 5. | -2. | -1. | 2.6 | D | 0.0 | 0.9 |
| 94 | F1   |                                                                                 | 82 | 99 | 22 | 61 | 29 | 92 | 644 | 403 | 44  | o | 25  | 30  |
|    |      |                                                                                 | 05 | 76 | 60 | 61 | 40 | 49 | 594 | 046 | 59  | w | 36  | 85  |
|    |      |                                                                                 | 9  | 6  | 9  | 5  | 7  | 8  | 753 | 667 | 47  | n | 44  | 92  |
|    |      |                                                                                 |    |    |    |    |    |    |     |     | 53  |   | 09  | 11  |

|    |     |                    |    |    |    |    |    |    |     |      |     |     |     |     |     |
|----|-----|--------------------|----|----|----|----|----|----|-----|------|-----|-----|-----|-----|-----|
| 12 | CNT | Contactin          | 6. | 5. | 5. | 6. | 7. | 7. | 2.2 | 1.1  | 2.2 | U   | 0.0 | 0.9 |     |
| 96 | NAP | associated         | 35 | 46 | 25 | 00 | 39 | 22 | 690 | 820  | 69  | p   | 23  | 30  |     |
| 84 | 5   | protein-like 5     | 25 | 26 | 70 | 71 | 01 | 12 | 525 | 9    | 05  |     | 72  | 85  |     |
|    |     |                    | 8  | 9  | 4  | 3  | 6  | 9  | 16  |      | 25  |     | 53  | 92  |     |
|    |     |                    |    |    |    |    |    |    |     |      | 16  |     | 85  | 11  |     |
| 18 | ECM | Extracellular      | 9. | 9. | 9. | 7. | 8. | 7. | -2. | -1.1 | 2.1 | D   | 0.0 | 0.9 |     |
| 93 | 1   | matrix protein 1   | 33 | 17 | 40 | 84 | 77 | 96 | 166 | 151  | 66  | o   | 02  | 30  |     |
|    |     |                    | 74 | 91 | 90 | 39 | 42 | 19 | 165 | 433  | 16  | w   | 29  | 85  |     |
|    |     |                    |    | 1  | 8  | 6  | 7  | 3  | 291 | 33   | 52  | n   | 78  | 92  |     |
|    |     |                    |    |    |    |    |    |    |     |      | 91  |     | 89  | 11  |     |
| 45 | MUC | Mucin              | 6, | 10 | 9. | 10 | 12 | 10 | 11  | 2.3  | 1.2 | 2.3 | U   | 0.0 | 0.9 |
| 88 | 6   | oligomeric         | .8 | 77 | .5 | .2 | .8 | .6 | 121 | 092  | 12  | p   | 14  | 30  |     |
|    |     | mucus/gel-forming  | 64 | 39 | 03 | 34 | 72 | 62 | 473 | 333  | 14  |     | 28  | 85  |     |
|    |     |                    | 3  | 9  | 21 | 07 | 66 | 47 | 36  | 33   | 73  |     | 43  | 92  |     |
|    |     |                    |    |    |    |    |    |    |     |      | 36  |     | 57  | 11  |     |
| 36 | ITG | Integrin $\beta$ 6 | 5. | 5. | 5. | 5. | 4. | 4. | -1. | -0.  | 1.5 | D   | 0.0 | 0.9 |     |
| 94 | B6  |                    | 46 | 29 | 39 | 14 | 32 | 89 | 514 | 598  | 14  | o   | 25  | 30  |     |
|    |     |                    | 15 | 89 | 03 | 01 | 01 | 50 | 151 | 51   | 15  | w   | 53  | 85  |     |
|    |     |                    | 5  |    | 8  | 5  | 2  | 3  | 959 |      | 19  | n   | 91  | 92  |     |
|    |     |                    |    |    |    |    |    |    |     |      | 59  |     | 17  | 11  |     |
| 14 | LAY | Layilin            | 5. | 6. | 6. | 4. | 5. | 4. | -1. | -0.  | 1.9 | D   | 0.0 | 0.9 |     |
| 39 | N   |                    | 54 | 05 | 76 | 72 | 96 | 84 | 929 | 948  | 29  | o   | 48  | 30  |     |
| 03 |     |                    | 87 | 76 | 80 | 47 | 27 | 27 | 272 | 056  | 27  | w   | 70  | 85  |     |
|    |     |                    | 7  | 1  | 3  | 6  | 1  | 7  | 146 | 667  | 21  | n   | 36  | 92  |     |
|    |     |                    |    |    |    |    |    |    |     |      | 46  |     | 73  | 11  |     |
| 64 | CBW | COBW domain        | 4. | 3. | 4. | 3. | 3. | 3. | -1. | -0.  | 1.6 | D   | 0.0 | 0.9 |     |
| 40 | D6  | containing 6       | 45 | 86 | 15 | 71 | 32 | 19 | 674 | 744  | 74  | o   | 05  | 30  |     |
| 19 |     |                    | 21 | 23 | 27 | 57 | 17 | 77 | 812 |      | 81  | w   | 34  | 85  |     |
|    |     |                    | 2  | 7  | 1  | 4  | 2  | 4  | 975 |      | 29  | n   | 61  | 92  |     |

|                |                 |                                                                                   |                     |                     |                     |                     |                     |                     |                          |                               |                             |                  |                             |                             |
|----------------|-----------------|-----------------------------------------------------------------------------------|---------------------|---------------------|---------------------|---------------------|---------------------|---------------------|--------------------------|-------------------------------|-----------------------------|------------------|-----------------------------|-----------------------------|
|                |                 |                                                                                   |                     |                     |                     |                     |                     |                     |                          |                               | 75                          |                  | 82                          | 11                          |
| 11<br>49<br>07 | FBX<br>O32      | F-box protein 32                                                                  | 7.<br>01<br>04<br>6 | 7.<br>23<br>95<br>2 | 7.<br>14<br>02<br>1 | 5.<br>32<br>86<br>3 | 6.<br>92<br>66<br>2 | 6.<br>26<br>29<br>1 | -1.<br>941<br>730<br>979 | -0.<br>957<br>343<br>333      | 1.9<br>41<br>73<br>09<br>79 | D<br>o<br>w<br>n | 0.0<br>31<br>29<br>26<br>14 | 0.9<br>30<br>85<br>92<br>11 |
| 38<br>90<br>15 | SLC<br>9A4      | Solute carrier family 9, subfamily A (NHE4, cation proton antiporter 4), member 4 | 7.<br>13<br>93<br>3 | 6.<br>74<br>95<br>8 | 6.<br>56<br>14<br>1 | 7.<br>41<br>61<br>8 | 7.<br>60<br>66<br>2 | 7.<br>32<br>09<br>3 | 1.5<br>487<br>847<br>65  | 0.6<br>311<br>366<br>67<br>65 | 1.5<br>48<br>78<br>47<br>65 | U<br>p           | 0.0<br>10<br>80<br>32<br>2  | 0.9<br>30<br>85<br>92<br>11 |
| 14<br>51<br>73 | B3G<br>LCT      | B<br>3-glucosyltransferase                                                        | 3.<br>99<br>84<br>5 | 5.<br>18<br>74<br>2 | 4.<br>63<br>01<br>9 | 5.<br>40<br>16<br>2 | 5.<br>16<br>28<br>2 | 5.<br>36<br>57<br>6 | 1.6<br>298<br>207<br>84  | 0.7<br>047<br>133<br>33<br>84 | 1.6<br>29<br>82<br>07<br>84 | U<br>p           | 0.0<br>37<br>88<br>72<br>79 | 0.9<br>30<br>85<br>92<br>11 |
| 55<br>77       | PRK<br>AR2<br>B | Protein kinase, camp-dependent, regulatory subunit type II $\beta$                | 4.<br>76<br>03<br>9 | 4.<br>93<br>86<br>5 | 5.<br>63<br>41<br>1 | 4.<br>17<br>92<br>5 | 4.<br>34<br>60<br>5 | 4.<br>02<br>54<br>1 | -1.<br>901<br>964<br>08  | -0.<br>927<br>49<br>08        | 1.9<br>01<br>96<br>40<br>8  | D<br>o<br>w<br>n | 0.0<br>04<br>56<br>05<br>4  | 0.9<br>30<br>85<br>92<br>11 |
| 69<br>26       | TBX<br>3        | T-box 3                                                                           | 5.<br>45<br>14      | 5.<br>22<br>24<br>9 | 5.<br>42<br>91<br>7 | 4.<br>10<br>50<br>9 | 4.<br>50<br>37<br>4 | 4.<br>54<br>66<br>6 | -1.<br>975<br>918<br>351 | -0.<br>982<br>523<br>333      | 1.9<br>75<br>91<br>83<br>51 | D<br>o<br>w<br>n | 0.0<br>00<br>39<br>69<br>75 | 0.9<br>30<br>85<br>92<br>11 |
| 27<br>14<br>7  | DEN<br>ND2<br>A | DENN/MADD domain containing 2A                                                    | 4.<br>31<br>95      | 4.<br>17<br>40      | 3.<br>81<br>34      | 4.<br>88<br>64      | 5.<br>05<br>21      | 4.<br>23<br>56      | 1.5<br>394<br>126        | 0.6<br>223<br>8               | 1.5<br>39<br>41             | U<br>p           | 0.0<br>31<br>85             | 0.9<br>30<br>85             |

|    |      |                         |    |    |    |    |    |    |     |     |     |   |     |     |
|----|------|-------------------------|----|----|----|----|----|----|-----|-----|-----|---|-----|-----|
|    |      |                         | 5  | 7  | 8  | 8  | 5  | 1  | 42  |     | 26  |   | 66  | 92  |
|    |      |                         |    |    |    |    |    |    |     |     | 42  |   | 71  | 11  |
| 72 | TUB  | Tubby bipartite         | 5. | 6. | 6. | 3. | 5. | 4. | -2. | -1. | 2.6 | D | 0.0 | 0.9 |
| 75 |      | transcription factor    | 04 | 02 | 58 | 66 | 33 | 50 | 606 | 381 | 06  | o | 24  | 30  |
|    |      |                         | 32 | 21 | 58 | 01 | 66 | 83 | 282 | 993 | 28  | w | 58  | 85  |
|    |      |                         |    | 6  | 4  | 9  | 7  | 6  | 255 | 333 | 22  | n | 81  | 92  |
|    |      |                         |    |    |    |    |    |    |     |     | 55  |   | 2   | 11  |
| 84 | SDP  | Serum deprivation       | 6. | 8. | 8. | 5. | 7. | 5. | -3. | -1. | 3.7 | D | 0.0 | 0.9 |
| 36 | R    | response                | 98 | 31 | 45 | 18 | 23 | 62 | 748 | 906 | 48  | o | 11  | 30  |
|    |      |                         | 87 | 73 | 34 | 14 | 57 | 33 | 499 | 313 | 49  | w | 84  | 85  |
|    |      |                         | 7  | 3  | 1  | 4  | 6  | 7  | 821 | 333 | 98  | n | 27  | 92  |
|    |      |                         |    |    |    |    |    |    |     |     | 21  |   | 21  | 11  |
| 69 | TCF  | Transcription           | 4. | 4. | 3. | 4. | 5. | 4. | 1.7 | 0.8 | 1.7 | U | 0.0 | 0.9 |
| 34 | 7L2  | factor 7-like 2         | 48 | 26 | 47 | 80 | 53 | 35 | 659 | 204 | 65  | p | 48  | 30  |
|    |      | (T-cell specific,       | 55 | 21 | 84 | 09 | 02 | 62 | 608 | 533 | 96  |   | 76  | 85  |
|    |      | HMG-box)                | 3  | 8  |    | 7  | 7  | 3  | 17  | 33  | 08  |   | 68  | 92  |
|    |      |                         |    |    |    |    |    |    |     |     | 17  |   | 08  | 11  |
| 55 | PPP1 | Protein                 | 6. | 6. | 6. | 5. | 5. | 5. | -1. | -0. | 1.8 | D | 0.0 | 0.9 |
| 07 | R3C  | phosphatase 1           | 11 | 23 | 87 | 38 | 82 | 33 | 858 | 893 | 58  | o | 06  | 30  |
|    |      | regulatory subunit      | 40 | 95 | 92 | 39 | 90 | 85 | 063 | 8   | 06  | w | 80  | 85  |
|    |      | 3C                      | 4  | 9  | 9  | 8  | 3  | 1  | 748 |     | 37  | n | 49  | 92  |
|    |      |                         |    |    |    |    |    |    |     |     | 48  |   | 33  | 11  |
| 55 | PRK  | Protein kinase,         | 5. | 6. | 6. | 5. | 5. | 5. | -1. | -0. | 1.5 | D | 0.0 | 0.9 |
| 67 | ACB  | camp-dependent, $\beta$ | 86 | 14 | 46 | 35 | 39 | 85 | 541 | 624 | 41  | o | 20  | 30  |
|    |      | catalytic subunit       | 81 | 10 | 88 | 27 | 99 | 18 | 672 | 496 | 67  | w | 32  | 85  |
|    |      |                         |    | 8  | 5  | 3  | 2  | 9  | 866 | 667 | 28  | n | 20  | 92  |
|    |      |                         |    |    |    |    |    |    |     |     | 66  |   | 4   | 11  |
| 31 | HLA  | Major                   | 9. | 8. | 9. | 9. | 7. | 6. | -3. | -1. | 3.0 | D | 0.0 | 0.9 |
| 26 | -DR  | histocompatibility      | 45 | 74 | 99 | 31 | 37 | 65 | 061 | 614 | 61  | o | 38  | 30  |



|               |                 |                                                        |                     |                     |                     |                     |                     |                     |                          |                          |                             |                  |                             |                             |
|---------------|-----------------|--------------------------------------------------------|---------------------|---------------------|---------------------|---------------------|---------------------|---------------------|--------------------------|--------------------------|-----------------------------|------------------|-----------------------------|-----------------------------|
|               | B4              | complex, class II,<br>DR $\beta$ 4                     | 38<br>1             | 29<br>9             | 44<br>7             | 63<br>1             | 92<br>7             | 24<br>5             | 870<br>642               | 413<br>333               | 87<br>06<br>42              | w<br>n           | 12<br>75<br>3               | 85<br>92<br>11              |
| 21<br>61      | F12             | Coagulation factor<br>XII (Hageman<br>factor)          | 7.<br>43<br>2       | 6.<br>86<br>90<br>5 | 7.<br>02<br>12      | 8.<br>06<br>11      | 7.<br>64<br>43      | 7.<br>57<br>15<br>1 | 1.5<br>708<br>695        | 0.6<br>515<br>633<br>33  | 1.5<br>70<br>86<br>95       | U<br>p           | 0.0<br>14<br>87<br>08<br>14 | 0.9<br>30<br>85<br>92<br>11 |
| 55<br>06<br>3 | ZCW<br>PW1      | Zinc finger, CW<br>type with PWWP<br>domain 1          | 5.<br>06<br>90<br>4 | 5.<br>33<br>49<br>8 | 4.<br>78<br>82      | 6.<br>00<br>78<br>5 | 5.<br>64<br>96<br>8 | 5.<br>41<br>62<br>7 | 1.5<br>445<br>358<br>24  | 0.6<br>271<br>733<br>33  | 1.5<br>44<br>53<br>58<br>24 | U<br>p           | 0.0<br>18<br>49<br>11<br>49 | 0.9<br>30<br>85<br>92<br>11 |
| 55<br>79<br>8 | MET<br>TL2<br>B | Methyltransferase<br>like 2B                           | 5.<br>03<br>49<br>3 | 5.<br>16<br>44<br>7 | 4.<br>89<br>32<br>7 | 5.<br>94<br>63<br>2 | 5.<br>59<br>18<br>6 | 5.<br>67<br>34<br>9 | 1.6<br>316<br>519<br>35  | 0.7<br>063<br>333<br>33  | 1.6<br>31<br>65<br>19<br>35 | U<br>p           | 0.0<br>02<br>30<br>90<br>83 | 0.9<br>30<br>85<br>92<br>11 |
| 84<br>93<br>5 | MED<br>AG       | Mesenteric<br>estrogen-dependent<br>adipogenesis       | 4.<br>12<br>21<br>9 | 4.<br>68<br>01<br>7 | 4.<br>28<br>11<br>4 | 4.<br>65<br>06<br>3 | 5.<br>22<br>14      | 6.<br>15<br>84<br>3 | 1.9<br>756<br>398<br>85  | 0.9<br>823<br>2<br>85    | 1.9<br>75<br>63<br>98<br>85 | U<br>p           | 0.0<br>27<br>12<br>68<br>94 | 0.9<br>30<br>85<br>92<br>11 |
| 54<br>20<br>9 | TRE<br>M2       | Triggering receptor<br>expressed on<br>myeloid cells 2 | 7.<br>10<br>69<br>3 | 7.<br>13<br>40<br>6 | 7.<br>30<br>06<br>4 | 6.<br>15<br>46<br>3 | 6.<br>68<br>66<br>5 | 6.<br>55<br>63<br>9 | -1.<br>641<br>088<br>831 | -0.<br>714<br>653<br>333 | 1.6<br>41<br>08<br>88<br>31 | D<br>o<br>w<br>n | 0.0<br>04<br>47<br>49<br>81 | 0.9<br>30<br>85<br>92<br>11 |
| 65            | ZDH             | Zinc finger,                                           | 6.                  | 7.                  | 6.                  | 8.                  | 7.                  | 7.                  | 2.0                      | 1.0                      | 2.0                         | U                | 0.0                         | 0.9                         |

|    |      |                            |    |    |    |    |    |    |     |     |     |   |     |     |
|----|------|----------------------------|----|----|----|----|----|----|-----|-----|-----|---|-----|-----|
| 30 | HC1  | DHHC-type                  | 91 | 05 | 68 | 66 | 61 | 44 | 350 | 250 | 35  | p | 12  | 30  |
| 82 | 1B   | containing 11B             | 36 | 02 | 32 | 03 | 54 | 65 | 769 | 833 | 07  |   | 07  | 85  |
|    |      |                            | 3  | 3  |    | 4  | 6  | 1  | 31  | 33  | 69  |   | 18  | 92  |
|    |      |                            |    |    |    |    |    |    |     |     | 31  |   | 84  | 11  |
| 30 | HIF1 | Hypoxia inducible          | 6. | 7. | 7. | 6. | 5. | 6. | -1. | -0. | 1.7 | D | 0.0 | 0.9 |
| 91 | A    | factor 1, $\alpha$ subunit | 73 | 42 | 86 | 99 | 99 | 57 | 764 | 819 | 64  | o | 44  | 30  |
|    |      | (basic                     | 74 | 54 | 09 | 33 | 86 | 39 | 557 | 306 | 55  | w | 72  | 85  |
|    |      | helix-loop-helix           | 3  | 5  | 5  | 3  | 4  | 4  | 774 | 667 | 77  | n | 73  | 92  |
|    |      | transcription              |    |    |    |    |    |    |     |     | 74  |   | 24  | 11  |
|    |      | factor)                    |    |    |    |    |    |    |     |     |     |   |     |     |
| 28 | ANG  | Angiopoietin 1             | 6. | 8. | 7. | 5. | 6. | 5. | -2. | -1. | 2.6 | D | 0.0 | 0.9 |
| 4  | PT1  |                            | 15 | 03 | 57 | 07 | 83 | 55 | 698 | 432 | 98  | o | 38  | 30  |
|    |      |                            | 71 | 44 | 28 | 79 | 19 | 80 | 566 | 193 | 56  | w | 41  | 85  |
|    |      |                            | 9  | 2  | 9  | 2  | 2  | 8  | 675 | 333 | 66  | n | 54  | 92  |
|    |      |                            |    |    |    |    |    |    |     |     | 75  |   | 98  | 11  |
| 44 | NPIP | Nuclear pore               | 5. | 5. | 6. | 4. | 4. | 5. | -1. | -0. | 1.8 | D | 0.0 | 0.9 |
| 03 | B4   | complex                    | 15 | 57 | 33 | 89 | 32 | 20 | 841 | 881 | 41  | o | 31  | 30  |
| 45 |      | interacting protein        | 31 | 97 | 36 | 51 | 09 | 72 | 706 | 043 | 70  | w | 97  | 85  |
|    |      | family member B4           |    | 5  |    | 7  |    | 5  | 712 | 333 | 67  | n | 36  | 92  |
|    |      |                            |    |    |    |    |    |    |     |     | 12  |   | 18  | 11  |
| 10 | LOC  | Uncharacterized            | 5. | 5. | 5. | 5. | 4. | 4. | -1. | -0. | 1.5 | D | 0.0 | 0.9 |
| 05 | 1005 | LOC100505984               | 46 | 29 | 39 | 14 | 32 | 89 | 514 | 598 | 14  | o | 25  | 30  |
| 05 | 0598 |                            | 15 | 89 | 03 | 01 | 01 | 50 | 151 | 51  | 15  | w | 53  | 85  |
| 98 | 4    |                            | 5  |    | 8  | 5  | 2  | 3  | 959 |     | 19  | n | 91  | 92  |
| 4  |      |                            |    |    |    |    |    |    |     |     | 59  |   | 17  | 11  |
| 52 | PGD  | Phosphogluconate           | 9. | 9. | 9. | 8. | 8. | 9. | -1. | -0. | 1.5 | D | 0.0 | 0.9 |
| 26 |      | dehydrogenase              | 27 | 40 | 52 | 50 | 77 | 02 | 555 | 637 | 55  | o | 05  | 30  |
|    |      |                            | 88 | 95 | 3  | 22 | 56 | 06 | 717 | 58  | 71  | w | 76  | 85  |
|    |      |                            |    | 2  |    | 3  | 9  | 6  | 384 |     | 73  | n | 84  | 92  |

|    |     |                      |    |    |    |    |    |    |     |     |     |   |     |     |
|----|-----|----------------------|----|----|----|----|----|----|-----|-----|-----|---|-----|-----|
|    |     |                      |    |    |    |    |    |    |     |     | 84  |   | 19  | 11  |
| 80 | DCA | DDB1 and CUL4        | 7. | 7. | 7. | 8. | 8. | 8. | 1.5 | 0.6 | 1.5 | U | 0.0 | 0.9 |
| 34 | F11 | associated factor 11 | 66 | 33 | 26 | 05 | 20 | 02 | 971 | 755 | 97  | p | 03  | 30  |
| 4  |     |                      | 13 | 49 | 53 | 89 | 88 | 04 | 538 | 033 | 15  |   | 16  | 85  |
|    |     |                      | 8  | 6  | 6  | 5  | 5  | 1  | 97  | 33  | 38  |   | 73  | 92  |
|    |     |                      |    |    |    |    |    |    |     |     | 97  |   | 1   | 11  |
| 22 | CBW | COBW domain          | 4. | 3. | 4. | 3. | 3. | 3. | -1. | -0. | 1.6 | D | 0.0 | 0.9 |
| 08 | D5  | containing 5         | 45 | 86 | 15 | 71 | 32 | 19 | 674 | 744 | 74  | o | 05  | 30  |
| 69 |     |                      | 21 | 23 | 27 | 57 | 17 | 77 | 812 |     | 81  | w | 34  | 85  |
|    |     |                      | 2  | 7  | 1  | 4  | 2  | 4  | 975 |     | 29  | n | 61  | 92  |
|    |     |                      |    |    |    |    |    |    |     |     | 75  |   | 82  | 11  |
| 28 | CDH | Cadherin 19, type 2  | 5. | 5. | 4. | 3. | 4. | 3. | -2. | -1. | 2.0 | D | 0.0 | 0.9 |
| 51 | 19  |                      | 25 | 09 | 87 | 80 | 35 | 98 | 039 | 028 | 39  | o | 00  | 30  |
| 3  |     |                      | 84 | 22 | 52 | 54 | 22 | 29 | 793 | 423 | 79  | w | 54  | 85  |
|    |     |                      | 2  |    | 9  | 2  | 9  | 3  | 82  | 333 | 38  | n | 27  | 92  |
|    |     |                      |    |    |    |    |    |    |     |     | 2   |   | 41  | 11  |
| 37 | WAS | WAS protein          | 7. | 7. | 7. | 8. | 8. | 8. | 2.0 | 1.0 | 2.0 | U | 0.0 | 0.9 |
| 46 | H3P | family homolog 3     | 80 | 50 | 00 | 94 | 50 | 07 | 975 | 686 | 97  | p | 05  | 30  |
| 66 |     | pseudogene           | 77 | 08 | 97 | 64 | 34 | 44 | 327 | 933 | 53  |   | 38  | 85  |
|    |     |                      | 1  | 5  | 2  | 6  | 6  | 4  | 45  | 33  | 27  |   | 14  | 92  |
|    |     |                      |    |    |    |    |    |    |     |     | 45  |   | 06  | 11  |
| 58 | MS4 | Membrane-spanning    | 4. | 4. | 4. | 3. | 4. | 4. | -1. | -0. | 1.6 | D | 0.0 | 0.9 |
| 47 | A7  | g 4-domains,         | 81 | 96 | 90 | 92 | 49 | 08 | 653 | 725 | 53  | o | 03  | 30  |
| 5  |     | subfamily A,         | 35 | 75 | 37 | 61 | 87 | 46 | 053 | 133 | 05  | w | 00  | 85  |
|    |     | member 7             | 8  |    | 9  | 3  | 3  | 1  | 404 | 333 | 34  | n | 23  | 92  |
|    |     |                      |    |    |    |    |    |    |     |     | 04  |   | 22  | 11  |
| 58 | RAB | RAB1A, member        | 6. | 5. | 5. | 5. | 4. | 5. | -1. | -0. | 1.6 | D | 0.0 | 0.9 |
| 61 | 1A  | RAS oncogene         | 12 | 95 | 60 | 27 | 93 | 31 | 645 | 718 | 45  | o | 05  | 30  |
|    |     | family               | 7  | 06 | 56 | 50 | 54 | 74 | 398 | 436 | 39  | w | 82  | 85  |

|    |      |                      |    |    |    |    |    |    |      |     |     |   |     |     |
|----|------|----------------------|----|----|----|----|----|----|------|-----|-----|---|-----|-----|
|    |      |                      |    | 2  | 2  | 2  | 7  | 4  | 082  | 667 | 80  | n | 23  | 92  |
|    |      |                      |    |    |    |    |    |    |      |     | 82  |   | 44  | 11  |
| 10 | CAL  | Calcitonin receptor  | 5. | 5. | 6. | 4. | 5. | 5. | -1.  | -0. | 1.5 | D | 0.0 | 0.9 |
| 20 | CRL  | like receptor        | 38 | 56 | 04 | 76 | 12 | 12 | 581  | 661 | 81  | o | 13  | 30  |
| 3  |      |                      | 99 | 11 | 32 | 35 | 52 | 05 | 883  | 643 | 88  | w | 66  | 85  |
|    |      |                      | 2  | 6  | 4  | 9  | 3  | 7  | 477  | 333 | 34  | n | 32  | 92  |
|    |      |                      |    |    |    |    |    |    |      |     | 77  |   | 2   | 11  |
| 28 | TRD  | T cell receptor Δ    | 7. | 7. | 7. | 6. | 6. | 7. | -1.  | -0. | 1.7 | D | 0.0 | 0.9 |
| 51 | V2   | variable 2           | 52 | 71 | 94 | 34 | 65 | 71 | 769  | 823 | 69  | o | 42  | 30  |
| 7  |      |                      | 97 | 63 | 6  | 80 | 49 | 79 | 988  | 74  | 98  | w | 37  | 85  |
|    |      |                      | 9  | 8  |    | 3  | 6  | 6  | 516  |     | 85  | n | 23  | 92  |
|    |      |                      |    |    |    |    |    |    |      |     | 16  |   | 06  | 11  |
| 83 | CAS  | Caspase 3            | 4. | 4. | 5. | 4. | 3. | 4. | -1.  | -0. | 1.5 | D | 0.0 | 0.9 |
| 6  | P3   |                      | 44 | 96 | 07 | 34 | 69 | 41 | 598  | 676 | 98  | o | 24  | 30  |
|    |      |                      | 88 | 30 | 64 | 63 | 86 | 27 | 630  | 836 | 63  | w | 85  | 85  |
|    |      |                      | 4  | 1  | 4  | 9  | 2  | 7  | 663  | 667 | 06  | n | 37  | 92  |
|    |      |                      |    |    |    |    |    |    |      |     | 63  |   | 41  | 11  |
| 10 | GIM  | GIMAP1-GIMAP5        | 6. | 6. | 6. | 5. | 5. | 6. | -1.  | -0. | 1.6 | D | 0.0 | 0.9 |
| 05 | AP1- | readthrough          | 16 | 20 | 81 | 11 | 78 | 11 | 652  | 724 | 52  | o | 40  | 30  |
| 27 | GIM  |                      | 31 | 81 | 84 | 41 | 36 | 75 | 656  | 786 | 65  | w | 03  | 85  |
| 94 | AP5  |                      | 8  | 1  |    | 9  | 3  | 1  | 238  | 667 | 62  | n | 95  | 92  |
| 9  |      |                      |    |    |    |    |    |    |      |     | 38  |   | 58  | 11  |
| 28 | IGK  | Immunoglobulin κ     | 4. | 5. | 5. | 4. | 4. | 4. | -2.1 | -1. | 2.1 | D | 0.0 | 0.9 |
| 93 | V1-3 | variable 1-33        | 84 | 68 | 56 | 43 | 01 | 39 | 180  | 082 | 18  | o | 02  | 30  |
| 3  | 3    |                      | 29 | 69 | 01 | 06 | 58 | 53 | 304  | 723 | 03  | w | 39  | 85  |
|    |      |                      | 2  | 1  | 6  | 2  | 8  | 2  | 54   | 333 | 04  | n | 96  | 92  |
|    |      |                      |    |    |    |    |    |    |      |     | 54  |   | 6   | 11  |
| 21 | F3   | Coagulation factor   | 7. | 7. | 7. | 8. | 8. | 8. | 1.6  | 0.6 | 1.6 | U | 0.0 | 0.9 |
| 52 |      | III (thromboplastin, | 54 | 75 | 70 | 52 | 22 | 32 | 137  | 904 | 13  | p | 01  | 30  |

|               |                 |                                                 |                     |                     |                     |                     |                     |                     |                          |                          |                             |                  |                             |                             |
|---------------|-----------------|-------------------------------------------------|---------------------|---------------------|---------------------|---------------------|---------------------|---------------------|--------------------------|--------------------------|-----------------------------|------------------|-----------------------------|-----------------------------|
|               |                 | tissue factor)                                  | 10<br>1             | 27<br>9             | 71<br>2             | 58<br>3             | 14<br>3             | 48<br>9             | 420<br>63                | 1                        | 74<br>20<br>63              |                  | 82<br>14<br>02              | 85<br>92<br>11              |
| 10<br>69<br>9 | COR<br>IN       | Corin, serine<br>peptidase                      | 6.<br>55<br>34<br>4 | 6.<br>18<br>45<br>1 | 7.<br>15<br>62<br>5 | 4.<br>99<br>42<br>9 | 5.<br>63<br>52<br>7 | 5.<br>71<br>46<br>1 | -2.<br>271<br>024<br>6   | -1.<br>183<br>343<br>333 | 2.2<br>71<br>02<br>46       | D<br>o<br>w<br>n | 0.0<br>04<br>20<br>04<br>85 | 0.9<br>30<br>85<br>92<br>11 |
| 18<br>03      | DPP<br>4        | Dipeptidyl-peptida<br>se 4                      | 9.<br>39<br>07<br>4 | 9.<br>07<br>15      | 8.<br>68<br>48<br>6 | 9.<br>96<br>15<br>1 | 9.<br>37<br>15<br>7 | 9.<br>89<br>36<br>9 | 1.6<br>198<br>085<br>8   | 0.6<br>958<br>233<br>33  | 1.6<br>19<br>80<br>85<br>8  | U<br>p           | 0.0<br>18<br>01<br>96<br>75 | 0.9<br>30<br>85<br>92<br>11 |
| 95<br>86      | CRE<br>B5       | Camp responsive<br>element binding<br>protein 5 | 8.<br>26<br>44<br>8 | 7.<br>98<br>73<br>7 | 7.<br>43<br>65<br>4 | 9.<br>23<br>87<br>6 | 8.<br>54<br>73<br>9 | 8.<br>49<br>52<br>5 | 1.8<br>205<br>024<br>3   | 0.8<br>643<br>366<br>67  | 1.8<br>20<br>50<br>24<br>3  | U<br>p           | 0.0<br>14<br>92<br>11<br>94 | 0.9<br>30<br>85<br>92<br>11 |
| 83<br>87<br>5 | BCO<br>2        | B-carotene<br>oxygenase 2                       | 7.<br>72<br>97<br>2 | 8.<br>09<br>52      | 7.<br>68<br>86      | 7.<br>49<br>63<br>8 | 6.<br>15<br>91      | 7.<br>06<br>85<br>6 | -1.<br>905<br>047<br>099 | -0.<br>929<br>826<br>667 | 1.9<br>05<br>04<br>70<br>99 | D<br>o<br>w<br>n | 0.0<br>22<br>72<br>95<br>87 | 0.9<br>30<br>85<br>92<br>11 |
| 54<br>60<br>2 | NDF<br>IP2<br>2 | Nedd4 family<br>interacting protein<br>2        | 5.<br>78<br>91<br>8 | 5.<br>65<br>98<br>4 | 5.<br>87<br>67<br>4 | 5.<br>58<br>77<br>6 | 4.<br>48<br>09<br>5 | 5.<br>25<br>17<br>3 | -1.<br>589<br>353<br>455 | -0.<br>668<br>44         | 1.5<br>89<br>35<br>34<br>55 | D<br>o<br>w<br>n | 0.0<br>41<br>13<br>65<br>44 | 0.9<br>30<br>85<br>92<br>11 |
| 64            | CHS             | Carbohydrate                                    | 6.                  | 7.                  | 6.                  | 5.                  | 5.                  | 6.                  | -1.                      | -0.                      | 1.7                         | D                | 0.0                         | 0.9                         |

|    |     |                    |    |    |    |    |    |    |     |     |     |   |     |     |
|----|-----|--------------------|----|----|----|----|----|----|-----|-----|-----|---|-----|-----|
| 37 | T8  | (N-acetylgalactosa | 45 | 35 | 77 | 85 | 80 | 45 | 767 | 821 | 67  | o | 19  | 30  |
| 7  |     | mine 4-0)          | 37 | 68 | 27 | 07 | 86 | 83 | 740 | 906 | 74  | w | 03  | 85  |
|    |     | sulfotransferase 8 | 6  |    | 8  |    | 2  |    | 697 | 667 | 06  | n | 30  | 92  |
|    |     |                    |    |    |    |    |    |    |     |     | 97  |   | 49  | 11  |
| 16 | DDB | Damage-specific    | 6. | 6. | 6. | 7. | 7. | 6. | 1.6 | 0.7 | 1.6 | U | 0.0 | 0.9 |
| 43 | 2   | DNA binding        | 44 | 35 | 64 | 44 | 76 | 50 | 920 | 588 | 92  | p | 41  | 30  |
|    |     | protein 2          | 20 | 41 | 19 | 34 | 49 | 61 | 943 | 1   | 09  |   | 06  | 85  |
|    |     |                    | 1  | 9  | 3  | 4  | 6  | 6  | 33  |     | 43  |   | 32  | 92  |
|    |     |                    |    |    |    |    |    |    |     |     | 33  |   | 6   | 11  |
| 56 | PRN | Prion protein      | 6. | 6. | 7. | 6. | 5. | 6. | -1. | -0. | 1.7 | D | 0.0 | 0.9 |
| 21 | P   |                    | 76 | 90 | 58 | 37 | 84 | 72 | 700 | 766 | 00  | o | 31  | 30  |
|    |     |                    | 79 | 01 | 55 | 64 | 88 | 96 | 803 | 216 | 80  | w | 60  | 85  |
|    |     |                    | 4  | 1  | 2  | 4  | 1  | 7  | 731 | 667 | 37  | n | 35  | 92  |
|    |     |                    |    |    |    |    |    |    |     |     | 31  |   | 07  | 11  |
| 97 | UTP | UTP14, U3 small    | 6. | 6. | 5. | 6. | 6. | 6. | 1.5 | 0.6 | 1.5 | U | 0.0 | 0.9 |
| 24 | 14C | nucleolar          | 16 | 41 | 66 | 97 | 62 | 49 | 259 | 097 | 25  | p | 31  | 30  |
|    |     | ribonucleoprotein, | 94 | 99 | 85 | 56 | 13 | 01 | 453 | 033 | 94  |   | 36  | 85  |
|    |     | homolog C (yeast)  | 7  |    | 4  |    |    | 2  | 91  | 33  | 53  |   | 94  | 92  |
|    |     |                    |    |    |    |    |    |    |     |     | 91  |   | 15  | 11  |
| 28 | GPX | Glutathione        | 9. | 8. | 8. | 8. | 9. | 9. | 1.8 | 0.9 | 1.8 | U | 0.0 | 0.9 |
| 78 | 3   | peroxidase 3       | 05 | 83 | 06 | 73 | 94 | 99 | 696 | 027 | 69  | p | 49  | 30  |
|    |     |                    | 82 | 87 | 45 | 59 | 38 | 01 | 652 | 8   | 66  |   | 68  | 85  |
|    |     |                    | 6  | 2  | 6  | 6  |    | 2  | 64  |     | 52  |   | 89  | 92  |
|    |     |                    |    |    |    |    |    |    |     |     | 64  |   | 17  | 11  |
| 26 | WSB | WD repeat and      | 5. | 6. | 6. | 5. | 5. | 5. | -1. | -0. | 1.6 | D | 0.0 | 0.9 |
| 11 | 1   | SOCS box           | 95 | 34 | 40 | 46 | 25 | 82 | 648 | 721 | 48  | o | 08  | 30  |
| 8  |     | containing 1       | 64 | 91 | 20 | 09 | 21 | 99 | 971 | 566 | 97  | w | 46  | 85  |
|    |     |                    | 5  | 8  | 8  | 8  | 1  | 2  | 731 | 667 | 17  | n | 76  | 92  |
|    |     |                    |    |    |    |    |    |    |     |     | 31  |   | 53  | 11  |

|    |      |                                  |    |    |    |    |    |    |     |     |     |   |     |     |
|----|------|----------------------------------|----|----|----|----|----|----|-----|-----|-----|---|-----|-----|
| 85 | AKR  | Aldo-keto                        | 6. | 6. | 6. | 5. | 5. | 6. | -1. | -0. | 1.6 | D | 0.0 | 0.9 |
| 74 | 7A2  | reductase family 7,<br>member A2 | 66 | 45 | 45 | 84 | 42 | 22 | 616 | 693 | 16  | o | 14  | 30  |
|    |      |                                  | 70 | 01 | 80 | 18 | 53 | 86 | 824 | 163 | 82  | w | 06  | 85  |
|    |      |                                  | 9  | 9  | 2  |    | 9  | 2  | 775 | 333 | 47  | n | 24  | 92  |
|    |      |                                  |    |    |    |    |    |    |     |     | 75  |   | 32  | 11  |
| 37 | KCN  | Potassium channel                | 5. | 5. | 6. | 4. | 5. | 4. | -1. | -0. | 1.8 | D | 0.0 | 0.9 |
| 79 | MB1  | subfamily M                      | 35 | 81 | 35 | 62 | 40 | 72 | 899 | 925 | 99  | o | 16  | 30  |
|    |      | regulatory $\beta$               | 51 | 13 | 75 | 12 | 04 | 59 | 311 | 476 | 31  | w | 32  | 85  |
|    |      | subunit 1                        | 4  | 7  | 7  | 9  | 1  | 5  | 671 | 667 | 16  | n | 29  | 92  |
|    |      |                                  |    |    |    |    |    |    |     |     | 71  |   | 72  | 11  |
| 51 | PDK  | Pyruvate                         | 6. | 5. | 5. | 7. | 6. | 6. | 2.0 | 1.0 | 2.0 | U | 0.0 | 0.9 |
| 63 | 1    | dehydrogenase                    | 27 | 24 | 95 | 48 | 54 | 51 | 300 | 215 | 30  | p | 19  | 30  |
|    |      | kinase, isozyme 1                | 66 | 49 | 16 | 46 | 19 | 11 | 660 | 266 | 06  |   | 24  | 85  |
|    |      |                                  |    | 1  | 2  |    | 2  | 9  | 49  | 67  | 60  |   | 91  | 92  |
|    |      |                                  |    |    |    |    |    |    |     |     | 49  |   | 7   | 11  |
| 34 | IDH3 | Isocitrate                       | 8. | 8. | 9. | 8. | 7. | 8. | -1. | -0. | 1.5 | D | 0.0 | 0.9 |
| 20 | B    | dehydrogenase 3                  | 88 | 80 | 07 | 41 | 89 | 56 | 548 | 630 | 48  | o | 14  | 30  |
|    |      | (NAD+) $\beta$                   | 18 | 94 | 73 | 23 | 54 | 94 | 033 | 436 | 03  | w | 19  | 85  |
|    |      |                                  | 1  | 2  |    | 5  | 5  | 2  | 473 | 667 | 34  | n | 94  | 92  |
|    |      |                                  |    |    |    |    |    |    |     |     | 73  |   | 62  | 11  |
| 57 | TWF  | Twinfilin actin                  | 4. | 4. | 5. | 4. | 3. | 4. | -1. | -0. | 1.6 | D | 0.0 | 0.9 |
| 56 | 1    | binding protein 1                | 96 | 78 | 61 | 82 | 97 | 47 | 626 | 701 | 26  | o | 37  | 30  |
|    |      |                                  | 82 | 91 | 42 | 07 | 10 | 50 | 266 | 563 | 26  | w | 94  | 85  |
|    |      |                                  | 4  |    | 5  | 8  | 4  | 8  | 093 | 333 | 60  | n | 00  | 92  |
|    |      |                                  |    |    |    |    |    |    |     |     | 93  |   | 01  | 11  |
| 87 | MPD  | Multiple PDZ                     | 5. | 6. | 6. | 3. | 5. | 4. | -2. | -1. | 2.2 | D | 0.0 | 0.9 |
| 77 | Z    | domain protein                   | 15 | 29 | 58 | 99 | 59 | 89 | 269 | 182 | 69  | o | 40  | 30  |
|    |      |                                  | 10 | 28 | 53 | 33 | 33 | 50 | 624 | 453 | 62  | w | 07  | 85  |
|    |      |                                  | 1  |    | 2  | 6  | 8  | 3  | 034 | 333 | 40  | n | 59  | 92  |

|                |                   |                                           |                     |                     |                     |                     |                     |                     |                          |                          |                             |                  |                             |                             |
|----------------|-------------------|-------------------------------------------|---------------------|---------------------|---------------------|---------------------|---------------------|---------------------|--------------------------|--------------------------|-----------------------------|------------------|-----------------------------|-----------------------------|
|                |                   |                                           |                     |                     |                     |                     |                     |                     |                          |                          | 34                          |                  | 63                          | 11                          |
| 21<br>99<br>02 | TME<br>M13<br>6   | Transmembrane<br>protein 136              | 5.<br>28<br>62<br>3 | 5.<br>26<br>09<br>9 | 4.<br>93<br>04<br>6 | 4.<br>59<br>49<br>3 | 4.<br>50<br>01<br>3 | 4.<br>61<br>31<br>8 | -1.<br>505<br>052<br>8   | -0.<br>589<br>813<br>333 | 1.5<br>05<br>05<br>2        | D<br>o<br>w<br>n | 0.0<br>04<br>10<br>00       | 0.9<br>30<br>85<br>92       |
| 12<br>72       | CNT<br>N1         | Contactin 1                               | 4.<br>94<br>72<br>7 | 6.<br>07<br>35<br>6 | 6.<br>07<br>96<br>6 | 2.<br>72<br>68<br>4 | 5.<br>22<br>86<br>5 | 3.<br>23<br>16<br>4 | -3.<br>920<br>669<br>412 | -1.<br>971<br>1<br>412   | 3.9<br>20<br>66<br>94<br>12 | D<br>o<br>w<br>n | 0.0<br>14<br>69<br>77<br>8  | 0.9<br>30<br>85<br>92<br>11 |
| 30<br>12       | HIST<br>1H2<br>AE | Histone cluster 1,<br>h2ae                | 6.<br>07<br>23<br>1 | 5.<br>96<br>80<br>4 | 5.<br>68<br>58<br>4 | 7.<br>05<br>27<br>2 | 6.<br>18<br>95<br>6 | 6.<br>33<br>48<br>6 | 1.5<br>336<br>649<br>42  | 0.6<br>169<br>833<br>33  | 1.5<br>33<br>66<br>49<br>42 | U<br>p           | 0.0<br>38<br>86<br>65<br>8  | 0.9<br>30<br>85<br>92<br>11 |
| 57<br>27       | PTC<br>H1         | Patched 1                                 | 8.<br>15<br>72<br>8 | 8.<br>68<br>66<br>4 | 9.<br>21<br>92<br>4 | 6.<br>93<br>25<br>1 | 8.<br>06<br>36<br>8 | 7.<br>65<br>95<br>8 | -2.<br>197<br>419<br>02  | -1.<br>135<br>81<br>02   | 2.1<br>97<br>41<br>90<br>2  | D<br>o<br>w<br>n | 0.0<br>12<br>53<br>49<br>83 | 0.9<br>30<br>85<br>92<br>11 |
| 56<br>64<br>9  | TMP<br>RSS4       | Transmembrane<br>protease, serine 4       | 6.<br>31<br>74<br>5 | 6.<br>68<br>84<br>2 | 6.<br>57<br>19<br>4 | 7.<br>04<br>78<br>1 | 7.<br>76<br>05<br>4 | 7.<br>32<br>22<br>3 | 1.8<br>036<br>549<br>06  | 0.8<br>509<br>233<br>33  | 1.8<br>03<br>65<br>49<br>06 | U<br>p           | 0.0<br>04<br>47<br>15<br>57 | 0.9<br>30<br>85<br>92<br>11 |
| 28<br>97<br>7  | MRP<br>L42        | Mitochondrial<br>ribosomal protein<br>L42 | 6.<br>45<br>96      | 6.<br>59<br>66      | 6.<br>93<br>49      | 6.<br>31<br>16      | 5.<br>46<br>71      | 6.<br>21<br>71      | -1.<br>585<br>689        | -0.<br>665<br>11         | 1.5<br>85<br>68             | D<br>o<br>w      | 0.0<br>32<br>44             | 0.9<br>30<br>85             |



|    |     |                                                                 |    |    |    |    |    |    |     |     |     |   |     |     |
|----|-----|-----------------------------------------------------------------|----|----|----|----|----|----|-----|-----|-----|---|-----|-----|
|    |     |                                                                 | 7  | 5  |    |    | 8  | 1  | 171 |     | 91  | n | 21  | 92  |
|    |     |                                                                 |    |    |    |    |    |    |     |     | 71  |   | 19  | 11  |
| 51 | PLA | Placenta specific 8                                             | 5. | 6. | 5. | 4. | 5. | 4. | -2. | -1. | 2.0 | D | 0.0 | 0.9 |
| 31 | C8  |                                                                 | 15 | 23 | 90 | 31 | 00 | 92 | 016 | 012 | 16  | o | 11  | 30  |
| 6  |     |                                                                 | 01 | 33 | 01 | 55 | 26 | 93 | 788 | 06  | 78  | w | 61  | 85  |
|    |     |                                                                 | 7  | 5  | 2  |    |    | 6  | 784 |     | 87  | n | 60  | 92  |
|    |     |                                                                 |    |    |    |    |    |    |     |     | 84  |   | 23  | 11  |
| 64 | RAP | RAP1B, member<br>of RAS oncogene<br>family pseudogene           | 4. | 4. | 5. | 4. | 3. | 4. | -1. | -0. | 1.6 | D | 0.0 | 0.9 |
| 37 | IBL |                                                                 | 58 | 65 | 24 | 40 | 56 | 28 | 673 | 743 | 73  | o | 24  | 30  |
| 52 |     |                                                                 | 07 | 86 | 06 | 31 | 14 | 57 | 961 | 266 | 96  | w | 86  | 85  |
|    |     |                                                                 | 6  | 9  | 7  | 2  | 6  | 4  | 871 | 667 | 18  | n | 34  | 92  |
|    |     |                                                                 |    |    |    |    |    |    |     |     | 71  |   | 96  | 11  |
| 49 | NSF | N-ethylmaleimide-<br>sensitive factor                           | 5. | 6. | 6. | 5. | 5. | 6. | -1. | -0. | 1.6 | D | 0.0 | 0.9 |
| 05 |     |                                                                 | 79 | 30 | 73 | 45 | 16 | 06 | 646 | 719 | 46  | o | 46  | 30  |
|    |     |                                                                 | 66 | 79 | 49 | 06 | 90 | 17 | 455 | 363 | 45  | w | 47  | 85  |
|    |     |                                                                 |    | 9  | 7  | 9  | 3  | 5  | 287 | 333 | 52  | n | 39  | 92  |
|    |     |                                                                 |    |    |    |    |    |    |     |     | 87  |   | 33  | 11  |
| 97 | TOX | Thymocyte<br>selection associated<br>high mobility<br>group box | 3. | 4. | 4. | 3. | 4. | 3. | -1. | -0. | 1.5 | D | 0.0 | 0.9 |
| 60 |     |                                                                 | 99 | 48 | 50 | 31 | 05 | 73 | 545 | 628 | 45  | o | 22  | 30  |
|    |     |                                                                 | 83 | 95 | 54 | 62 | 58 | 55 | 999 | 54  | 99  | w | 78  | 85  |
|    |     |                                                                 | 3  | 4  |    | 7  | 5  | 3  | 658 |     | 96  | n | 21  | 92  |
|    |     |                                                                 |    |    |    |    |    |    |     |     | 58  |   | 83  | 11  |
| 55 | TME | Transmembrane<br>protein 100                                    | 7. | 7. | 8. | 6. | 6. | 6. | -3. | -1. | 3.4 | D | 0.0 | 0.9 |
| 27 | M10 |                                                                 | 79 | 66 | 85 | 01 | 43 | 56 | 401 | 766 | 011 | o | 00  | 30  |
| 3  | 0   |                                                                 | 80 | 38 | 55 | 73 | 21 | 98 | 112 | 006 | 12  | w | 73  | 85  |
|    |     |                                                                 | 1  | 6  | 2  | 9  | 3  | 5  | 357 | 667 | 35  | n | 18  | 92  |
|    |     |                                                                 |    |    |    |    |    |    |     |     | 7   |   | 38  | 11  |
| 55 | ARL | ADP ribosylation<br>factor like gtpase                          | 5. | 5. | 5. | 5. | 3. | 4. | -1. | -0. | 1.7 | D | 0.0 | 0.9 |
| 20 | 8B  |                                                                 | 25 | 37 | 51 | 06 | 79 | 88 | 736 | 795 | 36  | o | 37  | 30  |

|                |                 |                                                 |                     |                     |                     |                     |                     |                     |                          |                          |                             |                  |                             |                             |
|----------------|-----------------|-------------------------------------------------|---------------------|---------------------|---------------------|---------------------|---------------------|---------------------|--------------------------|--------------------------|-----------------------------|------------------|-----------------------------|-----------------------------|
| 7              |                 | 8B                                              | 09<br>5             | 10<br>8             | 66<br>6             | 83<br>1             | 87<br>4             | 39<br>9             | 140<br>053               | 883<br>333               | 14<br>00<br>53              | w<br>n           | 15<br>83<br>59              | 85<br>92<br>11              |
| 65<br>43<br>46 | LGA<br>LS9<br>C | Lectin,<br>galactoside-binding<br>, soluble, 9C | 6.<br>98<br>30<br>7 | 6.<br>93<br>51<br>9 | 7.<br>16<br>41<br>1 | 5.<br>90<br>81<br>9 | 6.<br>66<br>25<br>8 | 6.<br>73<br>45<br>5 | -1.<br>507<br>700<br>636 | -0.<br>592<br>35<br>06   | 1.5<br>07<br>70<br>06<br>36 | D<br>o<br>w<br>n | 0.0<br>38<br>33<br>51<br>89 | 0.9<br>30<br>85<br>92<br>11 |
| 70<br>43       | TGF<br>B3       | Transforming<br>growth factor $\beta$ 3         | 5.<br>91<br>43<br>5 | 6.<br>34<br>89<br>8 | 6.<br>97<br>71<br>7 | 4.<br>94<br>33<br>6 | 6.<br>26<br>39<br>3 | 5.<br>34<br>57<br>9 | -1.<br>860<br>649<br>956 | -0.<br>895<br>806<br>667 | 1.8<br>60<br>64<br>99<br>56 | D<br>o<br>w<br>n | 0.0<br>49<br>21<br>52<br>61 | 0.9<br>30<br>85<br>92<br>11 |
| 28<br>66<br>3  | TRA<br>V20      | T cell receptor $\alpha$<br>variable 20         | 7.<br>52<br>97<br>9 | 7.<br>71<br>63<br>8 | 7.<br>94<br>6<br>3  | 6.<br>34<br>80<br>3 | 6.<br>65<br>49<br>6 | 7.<br>71<br>79<br>6 | -1.<br>769<br>988<br>516 | -0.<br>823<br>74<br>85   | 1.7<br>69<br>98<br>85<br>16 | D<br>o<br>w<br>n | 0.0<br>42<br>37<br>23<br>06 | 0.9<br>30<br>85<br>92<br>11 |
| 81<br>60<br>6  | LBH             | Limb bud and heart<br>development               | 5.<br>31<br>48<br>6 | 5.<br>60<br>77<br>7 | 6.<br>85<br>00<br>5 | 3.<br>87<br>39<br>2 | 4.<br>81<br>06<br>4 | 4.<br>51<br>23<br>4 | -2.<br>878<br>412<br>453 | -1.<br>525<br>273<br>333 | 2.8<br>78<br>41<br>24<br>53 | D<br>o<br>w<br>n | 0.0<br>06<br>72<br>56<br>61 | 0.9<br>30<br>85<br>92<br>11 |
| 15<br>81<br>58 | RAS<br>EF       | RAS and EF-hand<br>domain containing            | 8.<br>36<br>60<br>9 | 7.<br>99<br>50<br>4 | 7.<br>57<br>59<br>6 | 8.<br>67<br>20<br>2 | 8.<br>62<br>33<br>4 | 8.<br>82<br>22<br>7 | 1.6<br>550<br>177<br>23  | 0.7<br>268<br>466<br>67  | 1.6<br>55<br>01<br>77<br>23 | U<br>p           | 0.0<br>09<br>29<br>9        | 0.9<br>30<br>85<br>92<br>11 |
| 93             | KL              | Klotho                                          | 4.                  | 3.                  | 4.                  | 3.                  | 3.                  | 3.                  | -1.                      | -0.                      | 1.6                         | D                | 0.0                         | 0.9                         |

|    |     |                     |    |    |    |    |    |    |     |     |     |   |     |     |
|----|-----|---------------------|----|----|----|----|----|----|-----|-----|-----|---|-----|-----|
| 65 |     |                     | 26 | 94 | 26 | 18 | 79 | 31 | 651 | 723 | 51  | o | 04  | 30  |
|    |     |                     | 39 | 94 | 00 | 78 | 67 | 74 | 602 | 866 | 60  | w | 47  | 85  |
|    |     |                     | 9  | 8  | 7  | 2  |    | 2  | 682 | 667 | 26  | n | 33  | 92  |
|    |     |                     |    |    |    |    |    |    |     |     | 82  |   | 91  | 11  |
| 10 | TRI | Tripartite motif    | 5. | 5. | 5. | 6. | 6. | 5. | 1.5 | 0.6 | 1.5 | U | 0.0 | 0.9 |
| 10 | M10 | containing 10       | 60 | 47 | 17 | 10 | 27 | 84 | 757 | 560 | 75  | p | 07  | 30  |
| 7  |     |                     | 75 | 52 | 71 | 70 | 98 | 11 | 478 | 366 | 74  |   | 73  | 85  |
|    |     |                     | 3  | 9  | 5  | 7  | 5  | 6  | 2   | 67  | 78  |   | 19  | 92  |
|    |     |                     |    |    |    |    |    |    |     |     | 2   |   | 3   | 11  |
| 38 | TME | Transmembrane       | 8. | 7. | 8. | 7. | 7. | 7. | -1. | -0. | 1.5 | D | 0.0 | 0.9 |
| 83 | M22 | protein 220         | 21 | 82 | 11 | 52 | 71 | 11 | 514 | 598 | 14  | o | 17  | 30  |
| 35 | 0   |                     | 21 | 05 | 10 | 33 | 35 | 07 | 333 | 683 | 33  | w | 92  | 85  |
|    |     |                     | 7  | 5  | 1  | 4  | 9  | 5  | 888 | 333 | 38  | n | 60  | 92  |
|    |     |                     |    |    |    |    |    |    |     |     | 88  |   | 98  | 11  |
| 75 | YW  | Tyrosine            | 4. | 5. | 5. | 4. | 3. | 4. | -1. | -0. | 1.8 | D | 0.0 | 0.9 |
| 31 | HAE | 3-monooxygenase/t   | 95 | 06 | 84 | 58 | 83 | 81 | 835 | 876 | 35  | o | 25  | 30  |
|    |     | ryptophan           | 65 | 35 | 37 | 35 | 97 | 16 | 652 | 293 | 65  | w | 41  | 85  |
|    |     | 5-monooxygenase     |    | 7  | 6  | 2  | 5  | 8  | 957 | 333 | 29  | n | 68  | 92  |
|    |     | activation protein, |    |    |    |    |    |    |     |     | 57  |   | 07  | 11  |
|    |     | epsilon             |    |    |    |    |    |    |     |     |     |   |     |     |
| 26 | FBX | F-box protein 3     | 5. | 6. | 6. | 5. | 5. | 5. | -1. | -0. | 1.6 | D | 0.0 | 0.9 |
| 27 | O3  |                     | 86 | 35 | 73 | 62 | 19 | 86 | 684 | 752 | 84  | o | 23  | 30  |
| 3  |     |                     | 34 | 14 | 03 | 55 | 18 | 98 | 896 | 66  | 89  | w | 06  | 85  |
|    |     |                     | 5  | 3  | 8  | 5  | 9  | 4  | 533 |     | 65  | n | 24  | 92  |
|    |     |                     |    |    |    |    |    |    |     |     | 33  |   | 87  | 11  |
| 80 | SEM | Sema domain,        | 5. | 5. | 6. | 4. | 5. | 5. | -1. | -0. | 1.6 | D | 0.0 | 0.9 |
| 03 | A6D | transmembrane       | 55 | 85 | 25 | 80 | 66 | 14 | 608 | 685 | 08  | o | 33  | 30  |
| 1  |     | domain (TM), and    | 49 | 26 | 37 | 30 | 05 | 16 | 129 | 383 | 12  | w | 59  | 85  |
|    |     | cytoplasmic         | 5  | 8  | 8  | 8  | 3  | 5  | 215 | 333 | 92  | n | 37  | 92  |

|               |                  |                                                                       |                     |                     |                      |                     |                     |                     |                          |                          |                             |                  |                             |                             |
|---------------|------------------|-----------------------------------------------------------------------|---------------------|---------------------|----------------------|---------------------|---------------------|---------------------|--------------------------|--------------------------|-----------------------------|------------------|-----------------------------|-----------------------------|
|               |                  | domain,<br>(semaphorin) 6D                                            |                     |                     |                      |                     |                     |                     |                          |                          | 15                          |                  | 21                          | 11                          |
| 65<br>91      | SNA<br>I2        | Snail family zinc<br>finger 2                                         | 5.<br>39<br>02<br>9 | 5.<br>79<br>53<br>9 | 6.<br>51<br>78<br>7  | 4.<br>66<br>73      | 5.<br>04<br>15<br>5 | 4.<br>94<br>66      | -2.<br>022<br>350<br>887 | -1.<br>016<br>033<br>333 | 2.0<br>22<br>35<br>08<br>87 | D<br>o<br>w<br>n | 0.0<br>07<br>50<br>59<br>27 | 0.9<br>30<br>85<br>92<br>11 |
| 11<br>59      | CKM<br>T1B       | Creatine kinase,<br>mitochondrial 1B                                  | 9.<br>12<br>40<br>1 | 8.<br>82<br>88<br>9 | 9.<br>40<br>33<br>8  | 8.<br>26<br>93<br>6 | 8.<br>96<br>94<br>6 | 8.<br>24<br>30<br>1 | -1.<br>542<br>014<br>858 | -0.<br>624<br>816<br>667 | 1.5<br>42<br>01<br>48<br>58 | D<br>o<br>w<br>n | 0.0<br>33<br>73<br>71<br>98 | 0.9<br>30<br>85<br>92<br>11 |
| 28<br>75<br>5 | TRA<br>C         | T-cell receptor $\alpha$<br>constant                                  | 7.<br>52<br>97<br>9 | 7.<br>71<br>63<br>8 | 7.<br>94<br>6<br>3   | 6.<br>34<br>80<br>6 | 6.<br>65<br>49<br>6 | 7.<br>71<br>79<br>6 | -1.<br>769<br>988<br>516 | -0.<br>823<br>74<br>85   | 1.7<br>69<br>98<br>85<br>16 | D<br>o<br>w<br>n | 0.0<br>42<br>37<br>23<br>06 | 0.9<br>30<br>85<br>92<br>11 |
| 63<br>89      | SDH<br>A         | Succinate<br>dehydrogenase<br>complex subunit A,<br>flavoprotein (Fp) | 9.<br>64<br>26<br>8 | 9.<br>91<br>69<br>4 | 10<br>.0<br>53<br>34 | 9.<br>48<br>21<br>6 | 9.<br>02<br>82<br>7 | 9.<br>14<br>54<br>5 | -1.<br>571<br>737<br>185 | -0.<br>652<br>36<br>71   | 1.5<br>71<br>73<br>71<br>85 | D<br>o<br>w<br>n | 0.0<br>06<br>23<br>94<br>1  | 0.9<br>30<br>85<br>92<br>11 |
| 28<br>93<br>0 | IGK<br>V1-3<br>9 | Immunoglobulin<br>$\kappa$ variable 1-39<br>(gene/pseudogene)         | 5.<br>59<br>67<br>6 | 6.<br>29<br>76<br>1 | 6.<br>34<br>30<br>7  | 5.<br>39<br>94<br>4 | 5.<br>52<br>59<br>6 | 5.<br>10<br>19<br>3 | -1.<br>666<br>363<br>719 | -0.<br>736<br>703<br>333 | 1.6<br>66<br>36<br>37<br>19 | D<br>o<br>w<br>n | 0.0<br>14<br>84<br>42<br>4  | 0.9<br>30<br>85<br>92<br>11 |
| 92<br>70      | ITG<br>B1B       | Integrin $\beta$ 1<br>binding protein 1                               | 6.<br>65            | 6.<br>47            | 6.<br>93             | 5.<br>12            | 6.<br>02            | 5.<br>43            | -2.<br>237               | -1.<br>161               | 2.2<br>37                   | D<br>o           | 0.0<br>01                   | 0.9<br>30                   |

|                           |                     |                                                                                                                       |                     |                     |                     |                     |                     |                     |                          |                          |                             |                  |                             |                             |
|---------------------------|---------------------|-----------------------------------------------------------------------------------------------------------------------|---------------------|---------------------|---------------------|---------------------|---------------------|---------------------|--------------------------|--------------------------|-----------------------------|------------------|-----------------------------|-----------------------------|
|                           | P1                  |                                                                                                                       | 25<br>2             | 44<br>3             | 86<br>1             | 05<br>7             | 08<br>4             | 89<br>1             | 281<br>307               | 746<br>667               | 28<br>13<br>07              | w<br>n           | 92<br>23<br>76              | 85<br>92<br>11              |
| 11<br>73                  | AP2<br>M1           | Adaptor-related<br>protein complex 2,<br>mu 1 subunit                                                                 | 9.<br>44<br>63<br>1 | 9.<br>57<br>40<br>6 | 9.<br>94<br>81<br>5 | 8.<br>61<br>26<br>2 | 8.<br>68<br>95<br>3 | 9.<br>13<br>27<br>6 | -1.<br>795<br>687<br>953 | -0.<br>844<br>536<br>667 | 1.7<br>95<br>68<br>79<br>53 | D<br>o<br>w<br>n | 0.0<br>03<br>08<br>69<br>33 | 0.9<br>30<br>85<br>92<br>11 |
| 34<br>19                  | IDH3<br>A           | Isocitrate<br>dehydrogenase 3<br>(NAD+) $\alpha$                                                                      | 4.<br>29<br>39<br>1 | 4.<br>32<br>98<br>6 | 5.<br>09<br>09<br>4 | 4.<br>20<br>00<br>9 | 3.<br>59<br>90<br>1 | 3.<br>91<br>46<br>4 | -1.<br>587<br>756<br>856 | -0.<br>666<br>99         | 1.5<br>87<br>75<br>68<br>56 | D<br>o<br>w<br>n | 0.0<br>29<br>63<br>03<br>65 | 0.9<br>30<br>85<br>92<br>11 |
| 10<br>05<br>05<br>38<br>5 | IQCJ<br>-SCH<br>IP1 | IQCJ-SCHIP1<br>readthrough                                                                                            | 4.<br>55<br>75<br>6 | 5.<br>25<br>84<br>1 | 4.<br>92<br>18<br>8 | 4.<br>02<br>64<br>1 | 4.<br>25<br>97<br>1 | 4.<br>39<br>80<br>1 | -1.<br>607<br>230<br>299 | -0.<br>684<br>576<br>667 | 1.6<br>07<br>23<br>02<br>99 | D<br>o<br>w<br>n | 0.0<br>09<br>85<br>40<br>85 | 0.9<br>30<br>85<br>92<br>11 |
| 57<br>50<br>9             | MTU<br>S1           | Microtubule<br>associated tumor<br>suppressor 1                                                                       | 7.<br>93<br>24<br>7 | 7.<br>65<br>29<br>5 | 7.<br>09<br>04<br>6 | 8.<br>42<br>74<br>6 | 7.<br>94<br>74<br>2 | 8.<br>14<br>75<br>7 | 1.5<br>321<br>136<br>66  | 0.6<br>155<br>233<br>33  | 1.5<br>32<br>11<br>36<br>66 | U<br>p           | 0.0<br>35<br>29<br>56<br>4  | 0.9<br>30<br>85<br>92<br>11 |
| 26<br>18                  | GAR<br>T            | Phosphoribosylgly<br>cinamide<br>formyltransferase,<br>phosphoribosylglyc<br>inamide synthetase,<br>phosphoribosylami | 4.<br>34<br>62<br>8 | 4.<br>61<br>66<br>2 | 4.<br>96<br>04<br>5 | 4.<br>26<br>60<br>2 | 3.<br>37<br>06<br>9 | 4.<br>18<br>10<br>5 | -1.<br>626<br>604<br>301 | -0.<br>701<br>863<br>333 | 1.6<br>26<br>60<br>43<br>01 | D<br>o<br>w<br>n | 0.0<br>31<br>00<br>17<br>4  | 0.9<br>30<br>85<br>92<br>11 |

|               |                 |                                                        |                     |                     |                     |                     |                     |                     |                          |                          |                             |                  |                             |                                   |
|---------------|-----------------|--------------------------------------------------------|---------------------|---------------------|---------------------|---------------------|---------------------|---------------------|--------------------------|--------------------------|-----------------------------|------------------|-----------------------------|-----------------------------------|
|               |                 | noimidazole<br>synthetase                              |                     |                     |                     |                     |                     |                     |                          |                          |                             |                  |                             |                                   |
| 98<br>67      | PJA2            | Praja ring finger 2,<br>E3 ubiquitin<br>protein ligase | 6.<br>00<br>17<br>4 | 6.<br>52<br>16<br>2 | 7.<br>10<br>99<br>3 | 6.<br>19<br>94<br>4 | 4.<br>99<br>88<br>9 | 5.<br>60<br>39<br>5 | -1.<br>923<br>414<br>9   | -0.<br>943<br>67<br>9    | 1.9<br>23<br>41<br>49       | D<br>o<br>w<br>n | 0.0<br>33<br>96<br>11       | 0.9<br>30<br>85<br>92<br>06<br>11 |
| 56<br>25<br>6 | SER<br>TAD<br>4 | SERTA domain<br>containing 4                           | 5.<br>34<br>34<br>1 | 5.<br>92<br>63<br>2 | 5.<br>96<br>80<br>4 | 4.<br>75<br>78<br>7 | 5.<br>21<br>56<br>7 | 5.<br>20<br>95<br>6 | -1.<br>607<br>605<br>405 | -0.<br>684<br>913<br>333 | 1.6<br>07<br>60<br>54<br>05 | D<br>o<br>w<br>n | 0.0<br>15<br>74<br>52<br>61 | 0.9<br>30<br>85<br>92<br>11       |
| 88<br>76      | VNN<br>1        | Vanin 1                                                | 8.<br>54<br>04<br>3 | 8.<br>56<br>20<br>2 | 7.<br>50<br>46<br>9 | 9.<br>59<br>73<br>9 | 8.<br>47<br>51<br>1 | 9.<br>40<br>01<br>4 | 1.9<br>388<br>439<br>17  | 0.9<br>551<br>966<br>67  | 1.9<br>38<br>84<br>39<br>17 | U<br>p           | 0.0<br>36<br>03<br>97<br>74 | 0.9<br>30<br>85<br>92<br>11       |
| 28<br>6       | ANK<br>1        | Ankyrin 1                                              | 4.<br>13<br>64<br>8 | 3.<br>43<br>03<br>7 | 4.<br>00<br>15<br>7 | 5.<br>54<br>03<br>4 | 5.<br>50<br>37<br>7 | 3.<br>78<br>40<br>8 | 2.1<br>237<br>490<br>96  | 1.0<br>866<br>133<br>33  | 2.1<br>23<br>74<br>90<br>96 | U<br>p           | 0.0<br>47<br>80<br>90<br>22 | 0.9<br>30<br>85<br>92<br>11       |
| 10<br>75      | CTS<br>C        | Cathepsin C                                            | 8.<br>06<br>29<br>9 | 8.<br>25<br>58<br>7 | 8.<br>51<br>27<br>5 | 7.<br>45<br>94<br>5 | 7.<br>26<br>14<br>4 | 7.<br>42<br>77<br>2 | -1.<br>858<br>750<br>762 | -0.<br>894<br>333<br>333 | 1.8<br>58<br>75<br>07<br>62 | D<br>o<br>w<br>n | 0.0<br>00<br>69<br>33<br>91 | 0.9<br>30<br>85<br>92<br>11       |
| 92<br>55      | AIM<br>P1       | Aminoacyl trna<br>synthetase                           | 7.<br>76            | 7.<br>69            | 8.<br>13            | 7.<br>33            | 6.<br>26            | 7.<br>15            | -1.<br>926               | -0.<br>945               | 1.9<br>26                   | D<br>o           | 0.0<br>12                   | 0.9<br>30                         |

|               |                   |                                                                         |                     |                     |                     |                     |                     |                      |                          |                          |                             |                  |                             |                             |
|---------------|-------------------|-------------------------------------------------------------------------|---------------------|---------------------|---------------------|---------------------|---------------------|----------------------|--------------------------|--------------------------|-----------------------------|------------------|-----------------------------|-----------------------------|
|               |                   | complex-interactin<br>g multifunctional<br>protein 1                    | 21<br>3             | 92<br>1             | 19<br>3             | 35<br>1             | 39<br>3             | 86<br>3              | 167<br>724               | 733<br>333               | 16<br>77<br>24              | w<br>n           | 09<br>77<br>82              | 85<br>92<br>11              |
| 84<br>68<br>0 | ACC<br>S          | l-aminocyclopropa<br>ne-1-carboxylate<br>synthase homolog<br>(inactive) | 7.<br>08<br>74<br>4 | 6.<br>95<br>07<br>9 | 7.<br>49<br>94<br>3 | 7.<br>99<br>61<br>4 | 7.<br>37<br>53<br>8 | 7.<br>96<br>46<br>2  | 1.5<br>151<br>843<br>49  | 0.5<br>994<br>933<br>33  | 1.5<br>15<br>18<br>43<br>49 | U<br>p           | 0.0<br>31<br>35<br>06<br>81 | 0.9<br>30<br>85<br>92<br>11 |
| 10<br>72<br>0 | UGT<br>2B11       | UDP<br>glucuronosyltransf<br>erases 2 family,<br>polypeptide B11        | 7.<br>23<br>94      | 7.<br>63<br>80<br>2 | 8.<br>20<br>27<br>5 | 8.<br>51<br>62<br>9 | 9.<br>78<br>62<br>2 | 8.<br>89<br>26<br>51 | 2.5<br>871<br>194<br>51  | 1.3<br>713<br>466<br>67  | 2.5<br>87<br>11<br>94<br>51 | U<br>p           | 0.0<br>05<br>77<br>87<br>14 | 0.9<br>30<br>85<br>92<br>11 |
| 38<br>42      | TNP<br>O1         | Transportin 1                                                           | 4.<br>11<br>49<br>2 | 4.<br>54<br>24<br>4 | 4.<br>56<br>00<br>3 | 3.<br>93<br>80<br>4 | 3.<br>50<br>54<br>4 | 3.<br>73<br>03<br>7  | -1.<br>603<br>465<br>522 | -0.<br>681<br>193<br>333 | 1.6<br>03<br>46<br>55<br>22 | D<br>o<br>w<br>n | 0.0<br>04<br>65<br>64<br>52 | 0.9<br>30<br>85<br>92<br>11 |
| 28<br>89<br>3 | IGK<br>VID-<br>39 | Immunoglobulin $\kappa$<br>variable 1D-39                               | 5.<br>59<br>67<br>6 | 6.<br>29<br>76<br>1 | 6.<br>34<br>30<br>7 | 5.<br>39<br>94<br>4 | 5.<br>52<br>59<br>6 | 5.<br>10<br>19<br>3  | -1.<br>666<br>363<br>719 | -0.<br>736<br>703<br>333 | 1.6<br>66<br>36<br>37<br>19 | D<br>o<br>w<br>n | 0.0<br>14<br>84<br>42<br>4  | 0.9<br>30<br>85<br>92<br>11 |
| 28<br>7       | ANK<br>2          | Ankyrin 2,<br>neuronal                                                  | 4.<br>90<br>16<br>4 | 3.<br>99<br>43<br>1 | 3.<br>55<br>74<br>7 | 5.<br>97<br>35<br>7 | 5.<br>89<br>65<br>5 | 4.<br>40<br>04<br>7  | 2.4<br>156<br>531<br>7   | 1.2<br>724<br>133<br>33  | 2.4<br>15<br>65<br>31<br>7  | U<br>p           | 0.0<br>31<br>32<br>29<br>72 | 0.9<br>30<br>85<br>92<br>11 |
| 41            | MCF               | MCF.2 cell line                                                         | 7.                  | 7.                  | 6.                  | 6.                  | 5.                  | 4.                   | -3.                      | -1.                      | 3.3                         | D                | 0.0                         | 0.9                         |

|               |             |                                                                                                                    |                     |                     |                     |                     |                     |                     |                          |                          |                             |                  |                             |                             |
|---------------|-------------|--------------------------------------------------------------------------------------------------------------------|---------------------|---------------------|---------------------|---------------------|---------------------|---------------------|--------------------------|--------------------------|-----------------------------|------------------|-----------------------------|-----------------------------|
| 68            | 2           | derived transforming sequence                                                                                      | 52<br>15<br>1       | 23<br>07<br>3       | 38<br>59<br>3       | 17<br>63<br>2       | 53<br>48<br>5       | 18<br>27<br>5       | 359<br>119<br>997        | 748<br>083<br>333        | 59<br>11<br>99<br>97        | o<br>w<br>n      | 09<br>60<br>46<br>59        | 30<br>85<br>92<br>11        |
| 62<br>85      | S100<br>B   | S100 calcium binding protein B                                                                                     | 6.<br>86<br>44<br>2 | 7.<br>37<br>46<br>7 | 6.<br>83<br>51<br>8 | 5.<br>89<br>32<br>2 | 6.<br>28<br>57<br>4 | 6.<br>33<br>35<br>3 | -1.<br>807<br>413<br>579 | -0.<br>853<br>926<br>667 | 1.8<br>07<br>41<br>35<br>79 | D<br>o<br>w<br>n | 0.0<br>03<br>79<br>51<br>47 | 0.9<br>30<br>85<br>92<br>11 |
| 51<br>64      | PDK<br>2    | Pyruvate dehydrogenase kinase, isozyme 2                                                                           | 6.<br>97<br>15<br>6 | 7.<br>39<br>81<br>8 | 7.<br>08<br>75<br>6 | 6.<br>83<br>67<br>9 | 6.<br>17<br>24<br>6 | 6.<br>50<br>80<br>2 | -1.<br>565<br>557<br>684 | -0.<br>646<br>676<br>667 | 1.5<br>65<br>55<br>76<br>84 | D<br>o<br>w<br>n | 0.0<br>16<br>52<br>64<br>21 | 0.9<br>30<br>85<br>92<br>11 |
| 30<br>32      | HAD<br>HB   | Hydroxyacyl-coa dehydrogenase/3-ketoacyl-coa thiolase/enoyl-coa hydratase (trifunctional protein), $\beta$ subunit | 8.<br>73<br>96<br>3 | 8.<br>77<br>87<br>1 | 9.<br>00<br>88<br>7 | 8.<br>49<br>67<br>6 | 7.<br>81<br>72<br>7 | 8.<br>43<br>85<br>3 | -1.<br>506<br>864<br>821 | -0.<br>591<br>55<br>48   | 1.5<br>06<br>86<br>48<br>21 | D<br>o<br>w<br>n | 0.0<br>22<br>74<br>98<br>06 | 0.9<br>30<br>85<br>92<br>11 |
| 29<br>84<br>2 | TFC<br>P2L1 | Transcription factor CP2-like 1                                                                                    | 6.<br>59<br>73<br>4 | 6.<br>82<br>85<br>4 | 7.<br>45<br>70<br>2 | 8.<br>42<br>01<br>5 | 7.<br>43<br>83<br>2 | 7.<br>42<br>24<br>7 | 1.7<br>403<br>128<br>37  | 0.7<br>993<br>466<br>67  | 1.7<br>40<br>31<br>28<br>37 | U<br>p           | 0.0<br>42<br>64<br>13<br>92 | 0.9<br>30<br>85<br>92<br>11 |
| 50<br>9       | ATP5<br>C1  | ATP synthase, H <sup>+</sup> transporting, mitochondrial F1                                                        | 9.<br>38<br>70      | 9.<br>32<br>92      | 9.<br>74<br>08      | 8.<br>88<br>35      | 8.<br>49<br>72      | 9.<br>00<br>14      | -1.<br>615<br>129        | -0.<br>691<br>65         | 1.6<br>15<br>12             | D<br>o<br>w      | 0.0<br>06<br>42             | 0.9<br>30<br>85             |



|    |      |                           |   |    |    |    |    |    |    |     |     |     |   |     |     |
|----|------|---------------------------|---|----|----|----|----|----|----|-----|-----|-----|---|-----|-----|
|    |      | complex,<br>polypeptide 1 | γ | 4  | 5  | 2  |    |    | 6  | 675 |     | 96  | n | 65  | 92  |
|    |      |                           |   |    |    |    |    |    |    |     |     | 75  |   | 5   | 11  |
| 10 | LOC  | Uncharacterized           |   | 4. | 5. | 5. | 4. | 5. | 4. | -1. | -0. | 1.5 | D | 0.0 | 0.9 |
| 53 | 1053 | LOC105377283              |   | 98 | 29 | 69 | 13 | 12 | 69 | 595 | 674 | 95  | o | 45  | 30  |
| 77 | 7728 |                           |   | 97 | 40 | 11 | 25 | 87 | 13 | 623 | 12  | 62  | w | 31  | 85  |
| 28 | 3    |                           |   | 5  | 8  | 8  | 8  |    | 7  | 194 |     | 31  | n | 76  | 92  |
| 3  |      |                           |   |    |    |    |    |    |    |     |     | 94  |   | 42  | 11  |
| 54 | CKM  | Creatine kinase,          |   | 9. | 8. | 9. | 8. | 8. | 8. | -1. | -0. | 1.5 | D | 0.0 | 0.9 |
| 85 | T1A  | mitochondrial 1A          |   | 12 | 82 | 40 | 26 | 96 | 24 | 542 | 624 | 42  | o | 33  | 30  |
| 96 |      |                           |   | 40 | 88 | 33 | 93 | 94 | 30 | 014 | 816 | 01  | w | 73  | 85  |
|    |      |                           |   | 1  | 9  | 8  | 6  | 6  | 1  | 858 | 667 | 48  | n | 71  | 92  |
|    |      |                           |   |    |    |    |    |    |    |     |     | 58  |   | 98  | 11  |
| 10 | NPIP | Nuclear pore              |   | 5. | 5. | 6. | 4. | 4. | 5. | -1. | -0. | 1.8 | D | 0.0 | 0.9 |
| 01 | B5   | complex                   |   | 15 | 57 | 33 | 89 | 32 | 20 | 841 | 881 | 41  | o | 31  | 30  |
| 32 |      | interacting protein       |   | 31 | 97 | 36 | 51 | 09 | 72 | 706 | 043 | 70  | w | 97  | 85  |
| 24 |      | family, member B5         |   |    | 5  |    | 7  |    | 5  | 712 | 333 | 67  | n | 36  | 92  |
| 7  |      |                           |   |    |    |    |    |    |    |     |     | 12  |   | 18  | 11  |
| 91 | MAR  | MARVEL domain             |   | 6. | 6. | 6. | 7. | 7. | 7. | 1.6 | 0.7 | 1.6 | U | 0.0 | 0.9 |
| 86 | VEL  | containing 3              |   | 81 | 90 | 50 | 93 | 36 | 08 | 436 | 169 | 43  | p | 17  | 30  |
| 2  | D3   |                           |   | 50 | 58 | 99 | 31 | 42 | 42 | 996 | 466 | 69  |   | 89  | 85  |
|    |      |                           |   | 3  | 3  | 2  |    | 3  | 9  | 09  | 67  | 96  |   | 57  | 92  |
|    |      |                           |   |    |    |    |    |    |    |     |     | 09  |   | 16  | 11  |
| 53 | ATP6 | Atpase, H <sup>+</sup>    |   | 4. | 4. | 5. | 4. | 4. | 4. | -1. | -0. | 1.5 | D | 0.0 | 0.9 |
| 4  | V1G  | transporting,             |   | 80 | 93 | 67 | 39 | 82 | 42 | 501 | 586 | 01  | o | 47  | 30  |
|    | 2    | lysosomal 13kda,          |   | 16 | 04 | 35 | 50 | 06 | 94 | 922 | 81  | 92  | w | 98  | 85  |
|    |      | V1 subunit G2             |   |    | 6  | 1  | 5  | 2  | 7  | 114 |     | 21  | n | 88  | 92  |
|    |      |                           |   |    |    |    |    |    |    |     |     | 14  |   | 37  | 11  |
| 10 | POM  | POM121                    |   | 6. | 6. | 6. | 6. | 7. | 7. | 1.5 | 0.6 | 1.5 | U | 0.0 | 0.9 |
| 01 | 121C | transmembrane             |   | 93 | 35 | 04 | 85 | 32 | 06 | 534 | 354 | 53  | p | 35  | 30  |

|    |     |                                                       |    |    |    |    |    |    |     |     |     |   |     |     |
|----|-----|-------------------------------------------------------|----|----|----|----|----|----|-----|-----|-----|---|-----|-----|
| 01 |     | nucleoporin C                                         | 23 | 22 | 64 | 11 | 10 | 53 | 473 | 733 | 44  |   | 44  | 85  |
| 26 |     |                                                       | 9  | 1  | 9  | 3  | 3  | 5  | 36  | 33  | 73  |   | 52  | 92  |
| 7  |     |                                                       |    |    |    |    |    |    |     |     | 36  |   | 56  | 11  |
| 81 | SGP | Sphingosine-1-phosphate phosphatase 1                 | 5. | 6. | 6. | 6. | 4. | 5. | -1. | -0. | 1.8 | D | 0.0 | 0.9 |
| 53 | P1  |                                                       | 99 | 53 | 38 | 10 | 73 | 51 | 806 | 853 | 06  | o | 35  | 30  |
| 7  |     |                                                       | 67 | 12 | 32 | 18 | 77 | 19 | 549 | 236 | 54  | w | 52  | 85  |
|    |     |                                                       | 6  | 9  | 3  | 4  | 6  | 7  | 351 | 667 | 93  | n | 19  | 92  |
|    |     |                                                       |    |    |    |    |    |    |     |     | 51  |   | 91  | 11  |
| 56 | PRT | Phosphoribosyl transferase domain containing 1        | 5. | 4. | 5. | 4. | 3. | 4. | -1. | -0. | 1.5 | D | 0.0 | 0.9 |
| 95 | FDC |                                                       | 06 | 87 | 14 | 72 | 85 | 70 | 513 | 597 | 13  | o | 40  | 30  |
| 2  | 1   |                                                       | 56 | 21 | 09 | 65 | 92 | 04 | 053 | 463 | 05  | w | 96  | 85  |
|    |     |                                                       |    | 5  | 7  | 7  | 9  | 7  | 849 | 333 | 38  | n | 09  | 92  |
|    |     |                                                       |    |    |    |    |    |    |     |     | 49  |   | 29  | 11  |
| 22 | FCG | Fc fragment of igg, low affinity iia, receptor (CD32) | 6. | 6. | 6. | 5. | 6. | 6. | -1. | -0. | 1.6 | D | 0.0 | 0.9 |
| 12 | R2A |                                                       | 86 | 75 | 81 | 45 | 71 | 13 | 637 | 711 | 37  | o | 44  | 30  |
|    |     |                                                       | 53 | 45 | 51 | 44 | 51 | 16 | 210 | 24  | 21  | w | 11  | 85  |
|    |     |                                                       | 4  | 1  | 2  | 8  | 2  | 5  | 699 |     | 06  | n | 55  | 92  |
|    |     |                                                       |    |    |    |    |    |    |     |     | 99  |   | 06  | 11  |
| 57 | DSC | Down syndrome cell adhesion molecule like 1           | 4. | 4. | 5. | 6. | 6. | 6. | 2.4 | 1.3 | 2.4 | U | 0.0 | 0.9 |
| 45 | AML |                                                       | 88 | 98 | 53 | 94 | 16 | 19 | 712 | 052 | 71  | p | 01  | 30  |
| 3  | 1   |                                                       | 15 | 04 | 15 | 93 | 72 | 25 | 083 | 166 | 20  |   | 47  | 85  |
|    |     |                                                       |    |    | 5  |    | 9  | 1  | 77  | 67  | 83  |   | 02  | 92  |
|    |     |                                                       |    |    |    |    |    |    |     |     | 77  |   | 29  | 11  |
| 10 | PRD | Peroxiredoxin 3                                       | 8. | 8. | 9. | 8. | 7. | 8. | -1. | -0. | 1.6 | D | 0.0 | 0.9 |
| 93 | X3  |                                                       | 66 | 97 | 45 | 32 | 89 | 78 | 617 | 694 | 17  | o | 38  | 30  |
| 5  |     |                                                       | 54 | 01 | 48 | 60 | 23 | 98 | 852 | 08  | 85  | w | 74  | 85  |
|    |     |                                                       | 9  | 9  | 4  | 9  | 8  | 1  | 407 |     | 24  | n | 78  | 92  |
|    |     |                                                       |    |    |    |    |    |    |     |     | 07  |   | 88  | 11  |
| 14 | CIA | Circadian                                             | 5. | 5. | 5. | 7. | 5. | 7. | 2.5 | 1.3 | 2.5 | U | 0.0 | 0.9 |

|    |      |                     |    |    |    |    |    |    |     |     |     |   |     |     |
|----|------|---------------------|----|----|----|----|----|----|-----|-----|-----|---|-----|-----|
| 85 | RT   | associated          | 16 | 23 | 41 | 51 | 29 | 12 | 922 | 741 | 92  | p | 29  | 30  |
| 23 |      | repressor of        | 77 | 16 | 02 | 80 | 40 | 00 | 232 | 9   | 22  |   | 83  | 85  |
|    |      | transcription       | 9  | 4  | 3  | 5  | 9  | 9  | 99  |     | 32  |   | 73  | 92  |
|    |      |                     |    |    |    |    |    |    |     |     | 99  |   | 55  | 11  |
| 22 | TTC  | Tetratricopeptide   | 8. | 8. | 8. | 9. | 8. | 8. | 1.6 | 0.7 | 1.6 | U | 0.0 | 0.9 |
| 99 | 39A  | repeat domain 39A   | 03 | 24 | 49 | 19 | 98 | 77 | 557 | 275 | 55  | p | 03  | 30  |
| 6  |      |                     | 21 | 13 | 75 | 02 | 91 | 42 | 826 | 133 | 78  |   | 87  | 85  |
|    |      |                     | 2  | 6  | 8  | 2  | 8  |    | 81  | 33  | 26  |   | 55  | 92  |
|    |      |                     |    |    |    |    |    |    |     |     | 81  |   | 09  | 11  |
| 46 | MY   | Myosin, heavy       | 10 | 11 | 11 | 7. | 11 | 8. | -4. | -2. | 4.1 | D | 0.0 | 0.9 |
| 29 | H11  | chain 11, smooth    | .6 | .5 | .5 | 52 | .3 | 62 | 193 | 068 | 93  | o | 46  | 30  |
|    |      | muscle              | 20 | 85 | 35 | 62 | 88 | 33 | 553 | 173 | 55  | w | 29  | 85  |
|    |      |                     | 69 | 61 | 85 | 7  | 04 | 2  | 708 | 333 | 37  | n | 46  | 92  |
|    |      |                     |    |    |    |    |    |    |     |     | 08  |   | 82  | 11  |
| 53 | PLP1 | Proteolipid protein | 5. | 5. | 4. | 4. | 4. | 4. | -1. | -0. | 1.8 | D | 0.0 | 0.9 |
| 54 |      | 1                   | 62 | 76 | 85 | 63 | 18 | 71 | 875 | 907 | 75  | o | 09  | 30  |
|    |      |                     | 80 | 98 | 10 | 04 | 61 | 11 | 276 | 103 | 27  | w | 98  | 85  |
|    |      |                     | 6  | 5  | 8  | 3  | 5  |    | 505 | 333 | 65  | n | 81  | 92  |
|    |      |                     |    |    |    |    |    |    |     |     | 05  |   | 13  | 11  |
| 56 | MAS  | Mannan-binding      | 6. | 6. | 5. | 7. | 7. | 7. | 2.2 | 1.1 | 2.2 | U | 0.0 | 0.9 |
| 48 | P1   | lectin serine       | 43 | 02 | 41 | 04 | 12 | 19 | 370 | 615 | 37  | p | 02  | 30  |
|    |      | peptidase 1 (C4/C2  | 48 | 92 | 32 | 08 | 39 | 73 | 435 | 933 | 04  |   | 05  | 85  |
|    |      | activating          | 7  | 8  | 3  | 2  | 8  | 6  | 36  | 33  | 35  |   | 17  | 92  |
|    |      | component of        |    |    |    |    |    |    |     |     | 36  |   | 91  | 11  |
|    |      | Ra-reactive factor) |    |    |    |    |    |    |     |     |     |   |     |     |
| 12 | COL  | Collagen, type IV,  | 5. | 6. | 7. | 4. | 6. | 4. | -2. | -1. | 2.4 | D | 0.0 | 0.9 |
| 87 | 4A5  | $\alpha$ 5          | 49 | 38 | 46 | 63 | 13 | 63 | 492 | 317 | 92  | o | 48  | 30  |
|    |      |                     | 71 | 96 | 06 | 23 | 04 | 23 | 206 | 423 | 20  | w | 91  | 85  |
|    |      |                     | 4  | 6  | 2  | 6  | 3  | 6  | 018 | 333 | 60  | n | 15  | 92  |

|    |     |                     |    |    |    |    |    |    |     |     |     |   |     |     |
|----|-----|---------------------|----|----|----|----|----|----|-----|-----|-----|---|-----|-----|
|    |     |                     |    |    |    |    |    |    |     |     | 18  |   | 45  | 11  |
| 11 | AP1 | Adaptor-related     | 6. | 5. | 5. | 6. | 6. | 6. | 1.5 | 0.5 | 1.5 | U | 0.0 | 0.9 |
| 74 | S1  | protein complex 1   | 24 | 67 | 59 | 14 | 69 | 44 | 040 | 888 | 04  | p | 34  | 30  |
|    |     | Σ 1 subunit         | 88 | 64 | 64 | 33 | 73 | 75 | 508 | 533 | 05  |   | 52  | 85  |
|    |     |                     | 5  | 4  | 5  | 6  | 6  | 8  | 39  | 33  | 08  |   | 49  | 92  |
|    |     |                     |    |    |    |    |    |    |     |     | 39  |   | 04  | 11  |
| 12 | COL | Collagen, type IV,  | 7. | 8. | 9. | 4. | 8. | 5. | -5. | -2. | 5.2 | D | 0.0 | 0.9 |
| 88 | 4A6 | α 6                 | 70 | 63 | 33 | 23 | 30 | 95 | 261 | 395 | 61  | o | 34  | 30  |
|    |     |                     | 35 | 78 | 40 | 17 | 28 | 45 | 521 | 48  | 52  | w | 18  | 85  |
|    |     |                     | 9  | 7  | 3  |    | 2  | 3  | 314 |     | 13  | n | 42  | 92  |
|    |     |                     |    |    |    |    |    |    |     |     | 14  |   | 57  | 11  |
| 76 | ZNF | Zinc finger protein | 4. | 5. | 4. | 4. | 4. | 4. | -1. | -0. | 1.5 | D | 0.0 | 0.9 |
| 78 | 124 | 124                 | 78 | 02 | 68 | 00 | 18 | 48 | 523 | 607 | 23  | o | 07  | 30  |
|    |     |                     | 5  | 23 | 83 | 38 | 54 | 43 | 433 | 326 | 43  | w | 13  | 85  |
|    |     |                     |    | 3  | 1  | 3  | 9  | 4  | 649 | 667 | 36  | n | 23  | 92  |
|    |     |                     |    |    |    |    |    |    |     |     | 49  |   | 52  | 11  |
| 14 | TME | Transmembrane       | 5. | 5. | 6. | 4. | 4. | 4. | -1. | -0. | 1.8 | D | 0.0 | 0.9 |
| 85 | M56 | protein 56          | 74 | 17 | 36 | 64 | 99 | 93 | 873 | 905 | 73  | o | 14  | 30  |
| 34 |     |                     | 26 | 94 | 97 | 46 | 15 | 87 | 345 | 616 | 34  | w | 83  | 85  |
|    |     |                     | 2  | 9  | 7  | 8  | 6  | 9  | 068 | 667 | 50  | n | 74  | 92  |
|    |     |                     |    |    |    |    |    |    |     |     | 68  |   | 28  | 11  |
| 11 | MOR | MORN repeat         | 5. | 5. | 5. | 5. | 3. | 4. | -2. | -1. | 2.2 | D | 0.0 | 0.9 |
| 88 | N4  | containing 4        | 49 | 29 | 97 | 11 | 95 | 14 | 274 | 185 | 74  | o | 06  | 30  |
| 12 |     |                     | 02 | 76 | 69 | 05 | 26 | 47 | 653 | 646 | 65  | w | 66  | 85  |
|    |     |                     | 2  | 2  | 6  | 1  | 5  |    | 298 | 667 | 32  | n | 28  | 92  |
|    |     |                     |    |    |    |    |    |    |     |     | 98  |   | 91  | 11  |
| 19 | EDN | Endothelin receptor | 5. | 5. | 6. | 3. | 4. | 4. | -2. | -1. | 2.2 | D | 0.0 | 0.9 |
| 10 | RB  | type B              | 44 | 49 | 19 | 99 | 92 | 67 | 264 | 179 | 64  | o | 04  | 30  |
|    |     |                     | 64 | 78 | 07 | 81 | 78 | 20 | 213 | 01  | 21  | w | 16  | 85  |

|    |      |                     |    |    |    |    |    |    |     |     |     |   |     |     |
|----|------|---------------------|----|----|----|----|----|----|-----|-----|-----|---|-----|-----|
|    |      |                     | 2  | 2  | 6  | 3  |    | 4  | 498 |     | 34  | n | 17  | 92  |
|    |      |                     |    |    |    |    |    |    |     |     | 98  |   | 99  | 11  |
| 63 | SCT  | Secretin receptor   | 4. | 5. | 5. | 4. | 5. | 4. | -1. | -0. | 1.7 | D | 0.0 | 0.9 |
| 44 | R    |                     | 82 | 50 | 93 | 32 | 00 | 63 | 702 | 767 | 02  | o | 34  | 30  |
|    |      |                     | 05 | 51 | 48 | 34 | 19 | 16 | 726 | 846 | 72  | w | 95  | 85  |
|    |      |                     | 2  | 2  | 3  |    | 2  | 1  | 436 | 667 | 64  | n | 89  | 92  |
|    |      |                     |    |    |    |    |    |    |     |     | 36  |   | 67  | 11  |
| 51 | GUL  | GULP, engulfment    | 5. | 5. | 6. | 5. | 4. | 5. | -1. | -0. | 1.5 | D | 0.0 | 0.9 |
| 45 | P1   | adaptor PTB         | 61 | 94 | 23 | 57 | 75 | 51 | 567 | 648 | 67  | o | 40  | 30  |
| 4  |      | domain containing   | 50 | 81 | 54 | 83 | 90 | 65 | 240 | 226 | 24  | w | 79  | 85  |
|    |      | 1                   | 9  | 2  | 2  | 1  | 6  | 8  | 589 | 667 | 05  | n | 17  | 92  |
|    |      |                     |    |    |    |    |    |    |     |     | 89  |   | 54  | 11  |
| 11 | MO   | Monoacylglycerol    | 10 | 9. | 9. | 10 | 10 | 10 | 1.6 | 0.7 | 1.6 | U | 0.0 | 0.9 |
| 62 | GAT  | O-acyltransferase 1 | .1 | 49 | 59 | .7 | .7 | .0 | 862 | 537 | 86  | p | 18  | 30  |
| 55 | 1    |                     | 39 | 00 | 57 | 34 | 40 | 12 | 011 | 766 | 20  |   | 63  | 85  |
|    |      |                     | 99 | 4  | 5  | 1  | 22 | 79 | 72  | 67  | 11  |   | 26  | 92  |
|    |      |                     |    |    |    |    |    |    |     |     | 72  |   | 98  | 11  |
| 83 | AXI  | Axin 2              | 4. | 4. | 5. | 3. | 4. | 4. | -1. | -0. | 1.5 | D | 0.0 | 0.9 |
| 13 | N2   |                     | 50 | 73 | 28 | 85 | 44 | 38 | 529 | 613 | 29  | o | 37  | 30  |
|    |      |                     | 52 | 79 | 67 | 45 | 67 | 83 | 856 | 396 | 85  | w | 14  | 85  |
|    |      |                     |    | 1  | 8  | 6  | 6  | 8  | 852 | 667 | 68  | n | 53  | 92  |
|    |      |                     |    |    |    |    |    |    |     |     | 52  |   | 66  | 11  |
| 23 | FOX  | Forkhead box L1     | 6. | 5. | 6. | 7. | 6. | 6. | 1.8 | 0.8 | 1.8 | U | 0.0 | 0.9 |
| 00 | L1   |                     | 70 | 42 | 00 | 00 | 83 | 88 | 124 | 579 | 12  | p | 22  | 30  |
|    |      |                     | 44 | 96 | 72 | 29 | 12 | 10 | 987 | 8   | 49  |   | 10  | 85  |
|    |      |                     | 6  | 3  |    | 8  | 3  | 2  | 5   |     | 87  |   | 26  | 92  |
|    |      |                     |    |    |    |    |    |    |     |     | 5   |   | 11  | 11  |
| 66 | SIGL | Sialic acid binding | 5. | 4. | 5. | 5. | 7. | 6. | 2.3 | 1.2 | 2.3 | U | 0.0 | 0.9 |
| 14 | EC1  | Ig-like lectin 1,   | 47 | 97 | 20 | 50 | 15 | 65 | 299 | 202 | 29  | p | 15  | 30  |

|               |            |                                                                                           |                     |                     |                     |                     |                     |                     |                          |                          |                             |                  |                             |                             |
|---------------|------------|-------------------------------------------------------------------------------------------|---------------------|---------------------|---------------------|---------------------|---------------------|---------------------|--------------------------|--------------------------|-----------------------------|------------------|-----------------------------|-----------------------------|
|               |            | sialoadhesin                                                                              | 80<br>4             | 05<br>2             | 93<br>2             | 95<br>1             | 74<br>5             | 17<br>5             | 139<br>39                | 766<br>67                | 91<br>39                    |                  | 06<br>02<br>12              | 85<br>92<br>11              |
| 55<br>72<br>9 | ATF7<br>IP | Activating<br>transcription factor<br>7 interacting<br>protein                            | 5.<br>55<br>40<br>7 | 5.<br>73<br>44<br>1 | 5.<br>24<br>88<br>2 | 4.<br>94<br>84<br>6 | 4.<br>79<br>76<br>1 | 4.<br>83<br>85<br>2 | -1.<br>570<br>151<br>027 | -0.<br>650<br>903<br>333 | 1.5<br>70<br>15<br>10<br>27 | D<br>o<br>w<br>n | 0.0<br>04<br>38<br>89<br>93 | 0.9<br>30<br>85<br>92<br>11 |
| 69<br>43      | TCF<br>21  | Transcription<br>factor 21                                                                | 5.<br>47<br>30<br>4 | 6.<br>60<br>75<br>2 | 6.<br>83<br>31      | 4.<br>17<br>13<br>2 | 5.<br>70<br>90<br>6 | 5.<br>36<br>38<br>1 | -2.<br>334<br>569<br>708 | -1.<br>223<br>156<br>667 | 2.3<br>34<br>56<br>97<br>08 | D<br>o<br>w<br>n | 0.0<br>33<br>54<br>98<br>76 | 0.9<br>30<br>85<br>92<br>11 |
| 22<br>91<br>3 | RAL<br>Y   | RALY<br>heterogeneous<br>nuclear<br>ribonucleoprotein                                     | 7.<br>19<br>76<br>9 | 7.<br>45<br>52<br>3 | 7.<br>72<br>91<br>9 | 6.<br>84<br>56<br>7 | 6.<br>42<br>68<br>5 | 7.<br>14<br>79<br>2 | -1.<br>573<br>404<br>92  | -0.<br>653<br>89         | 1.5<br>73<br>40<br>49<br>2  | D<br>o<br>w<br>n | 0.0<br>21<br>89<br>80<br>32 | 0.9<br>30<br>85<br>92<br>11 |
| 94<br>44      | QKI        | QKI, KH domain<br>containing, RNA<br>binding                                              | 4.<br>18<br>23<br>2 | 4.<br>52<br>42<br>1 | 4.<br>82<br>96<br>7 | 3.<br>52<br>79<br>9 | 3.<br>62<br>56<br>3 | 4.<br>19<br>17<br>7 | -1.<br>658<br>949<br>535 | -0.<br>730<br>27         | 1.6<br>58<br>94<br>95<br>35 | D<br>o<br>w<br>n | 0.0<br>13<br>15<br>16<br>45 | 0.9<br>30<br>85<br>92<br>11 |
| 65<br>18      | SLC<br>2A5 | Solute carrier<br>family<br>(facilitated<br>glucose/fructose<br>transporter),<br>member 5 | 5.<br>96<br>25<br>4 | 5.<br>98<br>71<br>2 | 6.<br>39<br>93<br>6 | 5.<br>44<br>44<br>2 | 5.<br>28<br>31<br>4 | 5.<br>63<br>18<br>6 | -1.<br>583<br>591<br>249 | -0.<br>663<br>2          | 1.5<br>83<br>59<br>12<br>49 | D<br>o<br>w<br>n | 0.0<br>06<br>70<br>79<br>59 | 0.9<br>30<br>85<br>92<br>11 |

|    |      |                                   |    |    |    |    |    |    |    |     |     |     |   |     |     |
|----|------|-----------------------------------|----|----|----|----|----|----|----|-----|-----|-----|---|-----|-----|
| 57 | NLG  | Neurologin                        | 4, | 4. | 3. | 4. | 3. | 4. | 3. | -1. | -0. | 1.7 | D | 0.0 | 0.9 |
| 50 | N4X  | X-linked                          |    | 71 | 95 | 67 | 33 | 10 | 59 | 705 | 769 | 05  | o | 19  | 30  |
| 2  |      |                                   |    | 37 | 98 | 38 | 82 | 08 | 87 | 124 | 876 | 12  | w | 52  | 85  |
|    |      |                                   |    | 6  | 2  | 8  | 7  | 4  | 2  | 009 | 667 | 40  | n | 10  | 92  |
|    |      |                                   |    |    |    |    |    |    |    |     |     | 09  |   | 87  | 11  |
| 84 | ST6  | ST6                               |    | 6. | 7. | 7. | 5. | 6. | 4. | -2. | -1. | 2.7 | D | 0.0 | 0.9 |
| 62 | GAL  | $\beta$ -galactosamide            |    | 28 | 12 | 03 | 07 | 17 | 76 | 784 | 477 | 84  | o | 05  | 30  |
| 0  | 2    | $\alpha$ -2,6-sialyltransferase 2 |    | 26 | 90 | 50 | 41 | 40 | 66 | 290 | 31  | 29  | w | 66  | 85  |
|    |      |                                   |    | 3  | 3  | 8  | 3  | 3  | 5  | 996 |     | 09  | n | 66  | 92  |
|    |      |                                   |    |    |    |    |    |    |    |     |     | 96  |   | 2   | 11  |
| 72 | TXK  | TXK tyrosine                      |    | 4. | 5. | 4. | 5. | 5. | 5. | 1.6 | 0.7 | 1.6 | U | 0.0 | 0.9 |
| 94 |      | kinase                            |    | 44 | 00 | 76 | 46 | 66 | 19 | 301 | 050 | 30  | p | 07  | 30  |
|    |      |                                   |    | 54 | 13 | 24 | 47 | 57 | 37 | 672 | 2   | 16  |   | 40  | 85  |
|    |      |                                   |    | 2  | 3  | 8  | 4  | 6  | 9  | 64  |     | 72  |   | 85  | 92  |
|    |      |                                   |    |    |    |    |    |    |    |     |     | 64  |   | 12  | 11  |
| 39 | LGA  | Lectin,                           |    | 10 | 10 | 11 | 8. | 10 | 9. | -2. | -1. | 2.2 | D | 0.0 | 0.9 |
| 56 | LS1  | galactoside-binding               |    | .0 | .7 | .0 | 39 | .4 | 56 | 243 | 165 | 43  | o | 44  | 30  |
|    |      | , soluble, 1                      |    | 97 | 26 | 52 | 11 | 25 | 39 | 005 | 433 | 00  | w | 78  | 85  |
|    |      |                                   |    | 96 | 87 | 33 | 2  | 78 | 6  | 773 | 333 | 57  | n | 49  | 92  |
|    |      |                                   |    |    |    |    |    |    |    |     |     | 73  |   | 52  | 11  |
| 59 | ACT  | Actin, $\alpha$ 2, smooth         |    | 4. | 4. | 4. | 3. | 4. | 3. | -1. | -0. | 1.6 | D | 0.0 | 0.9 |
|    | A2   | muscle, aorta                     |    | 28 | 59 | 86 | 47 | 48 | 71 | 617 | 693 | 17  | o | 36  | 30  |
|    |      |                                   |    | 53 | 60 | 52 | 23 | 27 | 02 | 519 | 783 | 51  | w | 17  | 85  |
|    |      |                                   |    | 2  | 9  | 9  | 5  | 6  | 4  | 756 | 333 | 97  | n | 67  | 92  |
|    |      |                                   |    |    |    |    |    |    |    |     |     | 56  |   | 7   | 11  |
| 57 | AKR  | Aldo-keto                         |    | 11 | 11 | 11 | 10 | 10 | 11 | -1. | -0. | 1.6 | D | 0.0 | 0.9 |
| 01 | 1B10 | reductase family 1,               |    | .6 | .2 | .8 | .5 | .8 | .1 | 610 | 687 | 10  | o | 09  | 30  |
| 6  |      | member B10                        |    | 06 | 89 | 29 | 69 | 98 | 94 | 806 | 783 | 80  | w | 67  | 85  |
|    |      | (aldose reductase)                |    | 77 | 22 | 75 | 48 | 64 | 27 | 65  | 333 | 66  | n | 63  | 92  |

|    |     |                      |    |    |    |    |    |    |     |     |     |   |     |     |
|----|-----|----------------------|----|----|----|----|----|----|-----|-----|-----|---|-----|-----|
|    |     |                      |    |    |    |    |    |    |     |     | 5   |   | 43  | 11  |
| 75 | ZNF | Zinc finger protein  | 5. | 5. | 6. | 4. | 5. | 4. | -1. | -0. | 1.9 | D | 0.0 | 0.9 |
| 52 | 711 | 711                  | 16 | 98 | 24 | 60 | 60 | 33 | 929 | 947 | 29  | o | 41  | 30  |
|    |     |                      | 39 | 36 | 32 | 20 | 95 | 54 | 142 | 96  | 14  | w | 56  | 85  |
|    |     |                      | 6  | 3  | 8  | 9  |    |    | 881 |     | 28  | n | 20  | 92  |
|    |     |                      |    |    |    |    |    |    |     |     | 81  |   | 48  | 11  |
| 23 | STX | Syntaxin 12          | 6. | 6. | 6. | 6. | 4. | 6. | -1. | -0. | 1.8 | D | 0.0 | 0.9 |
| 67 | 12  |                      | 15 | 40 | 92 | 04 | 76 | 01 | 848 | 886 | 48  | o | 45  | 30  |
| 3  |     |                      | 16 | 19 | 55 | 53 | 09 | 40 | 425 | 296 | 42  | w | 73  | 85  |
|    |     |                      | 4  | 9  | 3  |    | 3  | 4  | 204 | 667 | 52  | n | 99  | 92  |
|    |     |                      |    |    |    |    |    |    |     |     | 04  |   | 66  | 11  |
| 93 | GTF | General              | 4. | 4. | 4. | 3. | 3. | 3. | -1. | -0. | 1.5 | D | 0.0 | 0.9 |
| 30 | 3C3 | transcription factor | 52 | 19 | 78 | 84 | 76 | 91 | 581 | 661 | 81  | o | 04  | 30  |
|    |     | IIIC subunit 3       | 52 | 34 | 67 | 18 | 32 | 70 | 302 | 113 | 30  | w | 37  | 85  |
|    |     |                      | 9  |    | 9  | 4  | 7  | 3  | 45  | 333 | 24  | n | 33  | 92  |
|    |     |                      |    |    |    |    |    |    |     |     | 5   |   | 6   | 11  |
| 44 | CBW | COBW domain          | 4. | 3. | 4. | 3. | 3. | 3. | -1. | -0. | 1.6 | D | 0.0 | 0.9 |
| 55 | D3  | containing 3         | 45 | 86 | 15 | 71 | 32 | 19 | 674 | 744 | 74  | o | 05  | 30  |
| 71 |     |                      | 21 | 23 | 27 | 57 | 17 | 77 | 812 |     | 81  | w | 34  | 85  |
|    |     |                      | 2  | 7  | 1  | 4  | 2  | 4  | 975 |     | 29  | n | 61  | 92  |
|    |     |                      |    |    |    |    |    |    |     |     | 75  |   | 82  | 11  |



Table SV. DEGs in comparison V.

| En try | Gene symb ol | Gene name                                    | A 10   | A 10   | A 10   | A 10   | A 10   | A 10   | Fol d-c han ge | log FC   | abs olu teFC | Re gu lat ion | P-v alu e | FD R      |
|--------|--------------|----------------------------------------------|--------|--------|--------|--------|--------|--------|----------------|----------|--------------|---------------|-----------|-----------|
| 30846  | EHD2         | EH domain containing 2                       | 593408 | 678377 | 646231 | 822781 | 772344 | 670535 | 2.232797       | 1.158833 | 2.232797     | Up            | 0.0256421 | 0.6633274 |
| 23743  | BHM2         | Bine--homocysteine S-methyltransferase 2     | 352481 | 401604 | 415429 | 554651 | 449426 | 459435 | 1.9724562      | 0.979933 | 1.9724562    | Up            | 0.0166501 | 0.6633274 |
| 729230 | CCR2         | Chemokine (C-C motif) receptor 2             | 452296 | 520992 | 448186 | 556436 | 520666 | 534245 | 1.5832729      | 0.66291  | 1.5832729    | Up            | 0.0287972 | 0.6633274 |
| 221303 | FAM162B      | Family with sequence similarity 162 member B | 456611 | 569016 | 518336 | 657025 | 728559 | 620509 | 2.908428       | 1.54024  | 2.908428     | Up            | 0.0041860 | 0.6633274 |
| 2313   | FLI1         | Fli-1 proto-oncogene, ETS transcription      | 37486  | 42752  | 47669  | 57217  | 55562  | 46667  | 2.072367       | 1.051339 | 2.072367     | Up            | 0.02096   | 0.6633274 |

|    |     |                      |    |    |    |    |    |    |     |     |     |   |     |     |
|----|-----|----------------------|----|----|----|----|----|----|-----|-----|-----|---|-----|-----|
|    |     | factor               | 7  | 2  | 6  |    | 9  | 6  | 25  |     | 64  |   | 38  | 74  |
|    |     |                      |    |    |    |    |    |    |     |     | 25  |   | 25  | 04  |
| 40 | MAR | Myristoylated        | 5. | 6. | 6. | 7. | 7. | 7. | 1.7 | 0.8 | 1.7 | U | 0.0 | 0.6 |
| 82 | CKS | alanine-rich protein | 94 | 54 | 74 | 55 | 02 | 12 | 754 | 282 | 75  | p | 15  | 63  |
|    |     | kinase C substrate   | 32 | 51 | 06 | 99 | 92 | 43 | 769 | 066 | 47  |   | 21  | 32  |
|    |     |                      | 1  |    | 7  | 8  | 9  | 3  | 94  | 67  | 69  |   | 62  | 74  |
|    |     |                      |    |    |    |    |    |    |     |     | 94  |   | 86  | 04  |
| 22 | NLR | NLR family, pyrin    | 5. | 6. | 6. | 8. | 7. | 6. | 2.2 | 1.1 | 2.2 | U | 0.0 | 0.6 |
| 86 | P1  | domain containing    | 82 | 95 | 00 | 25 | 53 | 54 | 734 | 848 | 73  | p | 42  | 63  |
| 1  |     | 1                    | 80 | 39 | 84 | 70 | 92 | 87 | 395 | 766 | 43  |   | 29  | 32  |
|    |     |                      | 3  | 5  | 4  | 5  | 2  | 8  | 86  | 67  | 95  |   | 67  | 74  |
|    |     |                      |    |    |    |    |    |    |     |     | 86  |   | 31  | 04  |
| 69 | HNF | HNF1 homeobox B      | 10 | 10 | 10 | 9. | 9. | 9. | -1. | -0. | 1.5 | D | 0.0 | 0.6 |
| 28 | 1B  |                      | .5 | .2 | .2 | 42 | 97 | 73 | 514 | 598 | 14  | o | 17  | 63  |
|    |     |                      | 21 | 13 | 04 | 86 | 97 | 51 | 575 | 913 | 57  | w | 96  | 32  |
|    |     |                      | 79 | 73 | 77 | 4  | 2  | 9  | 328 | 333 | 53  | n | 84  | 74  |
|    |     |                      |    |    |    |    |    |    |     |     | 28  |   | 53  | 04  |
| 63 | CCL | Chemokine (C-C       | 5. | 6. | 5. | 6. | 6. | 7. | 1.8 | 0.8 | 1.8 | U | 0.0 | 0.6 |
| 48 | 3   | motif) ligand 3      | 61 | 18 | 73 | 22 | 45 | 51 | 483 | 862 | 48  | p | 41  | 63  |
|    |     |                      | 87 | 27 | 16 | 15 | 80 | 23 | 013 |     | 30  |   | 15  | 32  |
|    |     |                      | 8  | 7  | 8  | 1  | 1  | 1  | 56  |     | 13  |   | 18  | 74  |
|    |     |                      |    |    |    |    |    |    |     |     | 56  |   | 01  | 04  |
| 21 | F11 | Coagulation factor   | 8. | 7. | 8. | 5. | 6. | 7. | -3. | -1. | 3.2 | D | 0.0 | 0.6 |
| 60 |     | XI                   | 53 | 83 | 21 | 49 | 42 | 58 | 227 | 690 | 27  | o | 11  | 63  |
|    |     |                      | 23 | 49 | 16 | 90 | 44 | 47 | 111 | 243 | 111 | w | 70  | 32  |
|    |     |                      | 2  | 5  | 5  | 1  | 3  | 5  | 294 | 333 | 29  | n | 83  | 74  |
|    |     |                      |    |    |    |    |    |    |     |     | 4   |   | 9   | 04  |
| 11 | PHB | Prohibitin 2         | 7. | 7. | 8. | 9. | 8. | 8. | 1.6 | 0.7 | 1.6 | U | 0.0 | 0.6 |
| 33 | 2   |                      | 86 | 53 | 29 | 18 | 21 | 55 | 839 | 518 | 83  | p | 42  | 63  |

|    |      |                     |    |    |    |    |    |    |     |     |     |   |     |     |
|----|------|---------------------|----|----|----|----|----|----|-----|-----|-----|---|-----|-----|
| 1  |      |                     | 68 | 75 | 62 | 34 | 43 | 85 | 975 | 9   | 99  |   | 19  | 32  |
|    |      |                     | 9  | 5  | 6  | 9  | 7  | 1  | 04  |     | 75  |   | 89  | 74  |
|    |      |                     |    |    |    |    |    |    |     |     | 04  |   | 44  | 04  |
| 94 | CHS  | Carbohydrate        | 3. | 3. | 3. | 4. | 5. | 3. | 1.7 | 0.8 | 1.7 | U | 0.0 | 0.6 |
| 35 | T2   | (N-acetylglucosami  | 54 | 84 | 79 | 62 | 10 | 94 | 807 | 325 | 80  | p | 22  | 63  |
|    |      | ne-6-O)             | 93 | 13 | 45 | 83 | 59 | 85 | 808 | 1   | 78  |   | 14  | 32  |
|    |      | sulfotransferase 2  | 9  | 7  | 7  | 3  | 7  | 6  | 7   |     | 08  |   | 98  | 74  |
|    |      |                     |    |    |    |    |    |    |     |     | 7   |   | 59  | 04  |
| 29 | FAM  | Family with         | 3. | 4. | 3. | 5. | 4. | 4. | 1.7 | 0.8 | 1.7 | U | 0.0 | 0.6 |
| 90 | 216A | sequence similarity | 45 | 25 | 96 | 28 | 63 | 18 | 498 | 071 | 49  | p | 39  | 63  |
| 2  |      | 216 member A        | 86 | 21 | 98 | 98 | 20 | 02 | 040 | 933 | 80  |   | 88  | 32  |
|    |      |                     |    | 8  | 5  | 8  | 8  | 5  | 03  | 33  | 40  |   | 50  | 74  |
|    |      |                     |    |    |    |    |    |    |     |     | 03  |   | 45  | 04  |
| 10 | FXY  | FXYD6-FXYD2         | 4. | 7. | 6. | 8. | 7. | 7. | 3.1 | 1.6 | 3.1 | U | 0.0 | 0.6 |
| 05 | D6-F | readthrough         | 87 | 22 | 08 | 39 | 30 | 40 | 224 | 426 | 22  | p | 27  | 63  |
| 33 | XYD  |                     | 02 | 80 | 07 | 00 | 87 | 82 | 316 | 7   | 43  |   | 61  | 32  |
| 18 | 2    |                     | 9  | 4  | 6  | 5  | 6  | 9  | 68  |     | 16  |   | 40  | 74  |
| 1  |      |                     |    |    |    |    |    |    |     |     | 68  |   | 75  | 04  |
| 23 | PLX  | Plexin D1           | 5. | 6. | 6. | 7. | 7. | 6. | 2.0 | 1.0 | 2.0 | U | 0.0 | 0.6 |
| 12 | ND1  |                     | 75 | 58 | 38 | 82 | 57 | 44 | 500 | 356 | 50  | p | 34  | 63  |
| 9  |      |                     | 99 | 85 | 15 | 27 | 25 | 15 | 323 | 466 | 03  |   | 93  | 32  |
|    |      |                     |    |    | 3  | 5  | 3  | 9  | 37  | 67  | 23  |   | 55  | 74  |
|    |      |                     |    |    |    |    |    |    |     |     | 37  |   | 35  | 04  |
| 55 | SOB  | Sine oculis binding | 3. | 4. | 3. | 4. | 4. | 4. | 1.7 | 0.7 | 1.7 | U | 0.0 | 0.6 |
| 08 | P    | protein homolog     | 38 | 33 | 86 | 67 | 33 | 94 | 292 | 901 | 29  | p | 22  | 63  |
| 4  |      |                     | 42 | 01 | 12 | 1  | 28 | 21 | 382 | 366 | 23  |   | 05  | 32  |
|    |      |                     | 3  |    | 7  |    | 2  | 9  | 66  | 67  | 82  |   | 70  | 74  |
|    |      |                     |    |    |    |    |    |    |     |     | 66  |   | 47  | 04  |
| 79 | PVRI | Poliovirus receptor | 5. | 6. | 6. | 5. | 5. | 5. | -1. | -0. | 1.5 | D | 0.0 | 0.6 |

|    |      |                      |    |    |    |    |    |    |     |     |     |   |     |     |
|----|------|----------------------|----|----|----|----|----|----|-----|-----|-----|---|-----|-----|
| 03 | G    | related              | 58 | 09 | 20 | 35 | 32 | 43 | 508 | 592 | 08  | o | 20  | 63  |
| 7  |      | immunoglobulin       | 91 | 27 | 45 | 07 | 37 | 31 | 282 | 906 | 28  | w | 47  | 32  |
|    |      | domain containing    | 1  | 1  | 3  |    | 7  | 6  | 497 | 667 | 24  | n | 26  | 74  |
|    |      |                      |    |    |    |    |    |    |     |     | 97  |   | 17  | 04  |
| 10 | SCG  | Secretagoin,         | 4. | 4. | 4. | 6. | 6. | 5. | 2.4 | 1.3 | 2.4 | U | 0.0 | 0.6 |
| 59 | N    | EF-hand calcium      | 80 | 44 | 94 | 66 | 20 | 27 | 850 | 133 | 85  | p | 07  | 63  |
| 0  |      | binding protein      | 43 | 61 | 83 | 51 | 30 | 05 | 932 |     | 09  |   | 70  | 32  |
|    |      |                      | 8  | 2  | 7  | 7  | 9  | 1  | 7   |     | 32  |   | 57  | 74  |
|    |      |                      |    |    |    |    |    |    |     |     | 7   |   | 26  | 04  |
| 54 | TME  | Transmembrane        | 4. | 4. | 5. | 6. | 6. | 5. | 1.9 | 0.9 | 1.9 | U | 0.0 | 0.6 |
| 97 | M13  | protein 132A         | 85 | 92 | 04 | 57 | 13 | 05 | 671 | 761 | 67  | p | 33  | 63  |
| 2  | 2A   |                      | 07 | 95 | 90 | 44 | 30 | 00 | 632 | 166 | 16  |   | 41  | 32  |
|    |      |                      | 3  |    | 2  | 8  | 6  | 6  | 21  | 67  | 32  |   | 98  | 74  |
|    |      |                      |    |    |    |    |    |    |     |     | 21  |   | 55  | 04  |
| 14 | MAC  | MACRO domain         | 6. | 4. | 5. | 3. | 4. | 4. | -1. | -0. | 1.9 | D | 0.0 | 0.6 |
| 07 | ROD  | containing 2         | 09 | 92 | 22 | 79 | 53 | 93 | 987 | 990 | 87  | o | 37  | 63  |
| 33 | 2    |                      | 06 | 29 | 78 | 91 | 36 | 61 | 350 | 846 | 35  | w | 07  | 32  |
|    |      |                      | 8  | 8  | 7  | 7  | 9  | 3  | 955 | 667 | 09  | n | 34  | 74  |
|    |      |                      |    |    |    |    |    |    |     |     | 55  |   | 25  | 04  |
| 13 | CRIP | Cysteine-rich        | 7. | 6. | 7. | 8. | 8. | 7. | 1.7 | 0.7 | 1.7 | U | 0.0 | 0.6 |
| 97 | 2    | protein 2            | 39 | 74 | 50 | 20 | 43 | 39 | 377 | 972 | 37  | p | 45  | 63  |
|    |      |                      | 49 | 85 | 13 | 55 | 98 | 09 | 292 | 033 | 72  |   | 73  | 32  |
|    |      |                      | 3  | 4  |    | 5  | 8  | 5  | 68  | 33  | 92  |   | 73  | 74  |
|    |      |                      |    |    |    |    |    |    |     |     | 68  |   | 41  | 04  |
| 11 | PKIG | Protein kinase       | 6. | 6. | 6. | 7. | 6. | 6. | 1.7 | 0.7 | 1.7 | U | 0.0 | 0.6 |
| 14 |      | (camp-dependent,     | 19 | 56 | 43 | 93 | 84 | 78 | 244 | 861 | 24  | p | 46  | 63  |
| 2  |      | catalytic) inhibitor | 65 | 68 | 92 | 40 | 59 | 09 | 305 | 2   | 43  |   | 25  | 32  |
|    |      | $\gamma$             | 1  | 9  | 7  | 7  | 7  | 9  | 18  |     | 05  |   | 74  | 74  |
|    |      |                      |    |    |    |    |    |    |     |     | 18  |   | 57  | 04  |

|        |                 |                                                                       |                      |                     |                     |                      |                     |                      |                          |                              |                             |                  |                             |                             |
|--------|-----------------|-----------------------------------------------------------------------|----------------------|---------------------|---------------------|----------------------|---------------------|----------------------|--------------------------|------------------------------|-----------------------------|------------------|-----------------------------|-----------------------------|
| 290    | ANP<br>EP       | Alanyl (membrane)<br>aminopeptidase                                   | 12<br>.9<br>22<br>82 | 12<br>.5<br>61<br>2 | 12<br>.6<br>00<br>4 | 11<br>.1<br>53<br>74 | 11<br>.5<br>77<br>1 | 12<br>.5<br>55<br>34 | -1.<br>908<br>906<br>8   | -0.<br>932<br>746<br>667     | 1.9<br>08<br>90<br>68       | D<br>o<br>w<br>n | 0.0<br>31<br>50<br>80<br>04 | 0.6<br>63<br>32<br>74<br>04 |
| 28299  | IGK<br>V1-5     | Immunoglobulin $\kappa$<br>variable 1-5                               | 6.<br>19<br>85<br>1  | 6.<br>53<br>61<br>1 | 6.<br>32<br>50<br>1 | 6.<br>74<br>64<br>1  | 9.<br>73<br>04<br>1 | 9.<br>47<br>33<br>2  | 4.9<br>137<br>915<br>8   | 2.2<br>968<br>366<br>67      | 4.9<br>13<br>79<br>15<br>8  | U<br>p           | 0.0<br>16<br>97<br>44<br>36 | 0.6<br>63<br>32<br>74<br>04 |
| 65012  | SLC2<br>6A10    | Solute carrier<br>family 26, member<br>10                             | 4.<br>51<br>28<br>2  | 5.<br>06<br>98<br>3 | 4.<br>28<br>62<br>6 | 6.<br>56<br>41<br>8  | 5.<br>28<br>20<br>1 | 5.<br>19<br>78<br>1  | 2.0<br>825<br>627<br>99  | 1.0<br>583<br>6<br>99        | 2.0<br>82<br>56<br>27<br>99 | U<br>p           | 0.0<br>32<br>83<br>58<br>07 | 0.6<br>63<br>32<br>74<br>04 |
| 57677  | ZFP1<br>4       | ZFP14 zinc finger<br>protein                                          | 5.<br>47<br>75<br>1  | 4.<br>72<br>04<br>6 | 5.<br>39<br>73<br>9 | 4.<br>43<br>53<br>7  | 4.<br>25<br>5<br>4  | 4.<br>73<br>76<br>4  | -1.<br>649<br>981<br>673 | -0.<br>722<br>45<br>16<br>73 | 1.6<br>49<br>98<br>16<br>73 | D<br>o<br>w<br>n | 0.0<br>21<br>21<br>52<br>97 | 0.6<br>63<br>32<br>74<br>04 |
| 348094 | ANK<br>DD1<br>A | Ankyrin repeat and<br>death domain<br>containing 1A                   | 3.<br>63<br>37<br>2  | 4.<br>30<br>65<br>5 | 4.<br>09<br>33<br>1 | 5.<br>34<br>00<br>7  | 4.<br>77<br>32<br>3 | 4.<br>19<br>90<br>2  | 1.6<br>929<br>976<br>84  | 0.7<br>595<br>8<br>76<br>84  | 1.6<br>92<br>99<br>76<br>84 | U<br>p           | 0.0<br>45<br>33<br>72<br>44 | 0.6<br>63<br>32<br>74<br>04 |
| 64377  | CHS<br>T8       | Carbohydrate<br>(N-acetylgalactosa<br>mine 4-0)<br>sulfotransferase 8 | 5.<br>31<br>40<br>5  | 5.<br>37<br>1<br>5  | 6.<br>12<br>38<br>6 | 3.<br>81<br>69<br>6  | 5.<br>26<br>38<br>6 | 4.<br>48<br>41<br>4  | -2.<br>115<br>936<br>99  | -1.<br>081<br>296<br>667     | 2.1<br>15<br>93<br>69       | D<br>o<br>w<br>n | 0.0<br>28<br>65<br>64       | 0.6<br>63<br>32<br>74       |

|    |      |                    |    |    |    |    |    |    |     |     |     |   |     |     |
|----|------|--------------------|----|----|----|----|----|----|-----|-----|-----|---|-----|-----|
|    |      |                    |    |    |    |    |    |    |     |     | 9   |   | 06  | 04  |
| 51 | ARM  | Armadillo repeat   | 6. | 7. | 7. | 7. | 7. | 7. | 1.6 | 0.7 | 1.6 | U | 0.0 | 0.6 |
| 30 | CX1  | containing,        | 63 | 07 | 41 | 91 | 92 | 42 | 451 | 182 | 45  | p | 24  | 63  |
| 9  |      | X-linked 1         | 25 | 06 | 37 | 69 | 86 | 60 | 395 | 1   | 13  |   | 91  | 32  |
|    |      |                    | 7  | 9  | 9  | 9  | 6  | 3  | 88  |     | 95  |   | 39  | 74  |
|    |      |                    |    |    |    |    |    |    |     |     | 88  |   | 3   | 04  |
| 85 | SCIN | Scinderin          | 6. | 5. | 6. | 5. | 3. | 6. | -2. | -1. | 2.4 | D | 0.0 | 0.6 |
| 47 |      |                    | 74 | 92 | 27 | 03 | 94 | 09 | 446 | 290 | 46  | o | 42  | 63  |
| 7  |      |                    | 70 | 38 | 76 | 64 | 50 | 42 | 840 | 92  | 84  | w | 03  | 32  |
|    |      |                    | 2  | 1  | 3  | 2  | 5  | 3  | 397 |     | 03  | n | 50  | 74  |
|    |      |                    |    |    |    |    |    |    |     |     | 97  |   | 24  | 04  |
| 49 | NR4  | Nuclear receptor   | 3. | 3. | 3. | 4. | 7. | 5. | 5.0 | 2.3 | 5.0 | U | 0.0 | 0.6 |
| 29 | A2   | subfamily 4 group  | 20 | 70 | 50 | 69 | 52 | 16 | 011 | 222 | 01  | p | 11  | 63  |
|    |      | A member 2         | 73 | 23 | 74 | 03 | 46 | 89 | 042 | 466 | 10  |   | 27  | 32  |
|    |      |                    | 1  | 5  | 8  | 2  | 5  | 1  | 08  | 67  | 42  |   | 44  | 74  |
|    |      |                    |    |    |    |    |    |    |     |     | 08  |   | 63  | 04  |
| 57 | CAM  | Calmodulin         | 7. | 7. | 7. | 5. | 6. | 6. | -1. | -0. | 1.7 | D | 0.0 | 0.6 |
| 66 | SAP3 | regulated spectrin | 48 | 04 | 17 | 76 | 55 | 95 | 754 | 810 | 54  | o | 36  | 63  |
| 2  |      | associated protein | 95 | 80 | 27 | 23 | 93 | 57 | 402 | 98  | 40  | w | 81  | 32  |
|    |      | family member 3    | 2  | 9  | 1  | 2  | 6  |    | 776 |     | 27  | n | 07  | 74  |
|    |      |                    |    |    |    |    |    |    |     |     | 76  |   | 1   | 04  |
| 84 | USM  | Up-regulated       | 6. | 4. | 5. | 3. | 3. | 4. | -2. | -1. | 2.5 | D | 0.0 | 0.6 |
| 83 | G5   | during skeletal    | 23 | 12 | 93 | 84 | 93 | 39 | 592 | 374 | 92  | o | 35  | 63  |
| 3  |      | muscle growth 5    | 63 | 54 | 43 | 92 | 15 | 24 | 456 | 32  | 45  | w | 32  | 32  |
|    |      | homolog (mouse)    | 3  | 5  | 8  | 3  | 7  |    | 892 |     | 68  | n | 39  | 74  |
|    |      |                    |    |    |    |    |    |    |     |     | 92  |   | 83  | 04  |
| 51 | MZB  | Marginal zone B    | 3. | 3. | 3. | 3. | 5. | 4. | 2.1 | 1.0 | 2.1 | U | 0.0 | 0.6 |
| 23 | 1    | and B1             | 32 | 43 | 15 | 22 | 04 | 88 | 206 | 845 | 20  | p | 48  | 63  |
| 7  |      | cell-specific      | 12 | 61 | 19 | 97 | 36 | 95 | 452 | 033 | 64  |   | 44  | 32  |

|    |      |                          |    |    |    |    |    |    |     |     |     |   |     |     |
|----|------|--------------------------|----|----|----|----|----|----|-----|-----|-----|---|-----|-----|
|    |      | protein                  | 7  | 5  | 3  | 2  | 4  |    | 97  | 33  | 52  |   | 98  | 74  |
|    |      |                          |    |    |    |    |    |    |     |     | 97  |   | 19  | 04  |
| 58 | RAB  | RAB6A, member            | 3. | 2. | 3. | 3. | 4. | 4. | 1.7 | 0.7 | 1.7 | U | 0.0 | 0.6 |
| 70 | 6A   | RAS oncogene             | 74 | 92 | 45 | 90 | 23 | 29 | 017 | 670 | 01  | p | 11  | 63  |
|    |      | family                   | 72 | 60 | 54 | 01 | 96 | 00 | 510 | 2   | 75  |   | 79  | 32  |
|    |      |                          | 6  | 1  | 7  | 3  | 4  | 3  | 5   |     | 10  |   | 69  | 74  |
|    |      |                          |    |    |    |    |    |    |     |     | 5   |   | 62  | 04  |
| 10 | SAE  | SUMO1 activating         | 6. | 6. | 6. | 7. | 6. | 7. | 1.6 | 0.6 | 1.6 | U | 0.0 | 0.6 |
| 05 | 1    | enzyme subunit 1         | 50 | 35 | 72 | 53 | 89 | 22 | 128 | 896 | 12  | p | 13  | 63  |
| 5  |      |                          | 19 | 68 | 78 | 08 | 75 | 70 | 810 | 4   | 88  |   | 99  | 32  |
|    |      |                          | 2  | 3  | 4  | 7  | 7  | 7  | 01  |     | 10  |   | 79  | 74  |
|    |      |                          |    |    |    |    |    |    |     |     | 01  |   | 56  | 04  |
| 55 | ARH  | Rho guanine              | 7. | 6. | 6. | 5. | 6. | 6. | -1. | -0. | 1.8 | D | 0.0 | 0.6 |
| 70 | GEF  | nucleotide               | 10 | 64 | 65 | 40 | 09 | 25 | 848 | 886 | 48  | o | 12  | 63  |
| 1  | 40   | exchange factor          | 85 | 74 | 67 | 83 | 19 | 24 | 942 | 7   | 94  | w | 48  | 32  |
|    |      | (GEF) 40                 |    | 8  | 5  | 3  |    |    | 04  |     | 20  | n | 63  | 74  |
|    |      |                          |    |    |    |    |    |    |     |     | 4   |   | 86  | 04  |
| 56 | PCD  | Protocadherin $\alpha$ 2 | 7. | 7. | 6. | 6. | 6. | 6. | -1. | -0. | 1.5 | D | 0.0 | 0.6 |
| 14 | HA2  |                          | 44 | 73 | 91 | 53 | 83 | 80 | 557 | 639 | 57  | o | 31  | 63  |
| 6  |      |                          | 20 | 45 | 29 | 69 | 18 | 31 | 526 | 256 | 52  | w | 81  | 32  |
|    |      |                          | 9  | 2  | 9  |    | 2  | 1  | 454 | 667 | 64  | n | 64  | 74  |
|    |      |                          |    |    |    |    |    |    |     |     | 54  |   | 86  | 04  |
| 57 | SLC4 | Solute carrier           | 7. | 7. | 7. | 6. | 7. | 7. | -1. | -0. | 1.5 | D | 0.0 | 0.6 |
| 21 | 5A4  | family 45, member        | 79 | 53 | 55 | 59 | 03 | 32 | 562 | 644 | 62  | o | 22  | 63  |
| 0  |      | 4                        | 95 | 65 | 24 | 49 | 51 | 64 | 688 | 03  | 68  | w | 64  | 32  |
|    |      |                          | 3  | 7  | 8  | 4  |    | 5  | 255 |     | 82  | n | 32  | 74  |
|    |      |                          |    |    |    |    |    |    |     |     | 55  |   | 14  | 04  |
| 94 | QKI  | QKI, KH domain           | 3. | 3. | 3. | 4. | 3. | 4. | 1.8 | 0.8 | 1.8 | U | 0.0 | 0.6 |
| 44 |      | containing, RNA          | 35 | 30 | 73 | 87 | 97 | 15 | 279 | 702 | 27  | p | 11  | 63  |

|                |                  |                                                               |                     |                     |                     |                     |                     |                     |                          |                             |                             |                  |                             |                             |
|----------------|------------------|---------------------------------------------------------------|---------------------|---------------------|---------------------|---------------------|---------------------|---------------------|--------------------------|-----------------------------|-----------------------------|------------------|-----------------------------|-----------------------------|
|                |                  | binding                                                       | 24<br>1             | 77<br>8             | 17<br>6             | 61<br>9             | 29                  | 36<br>1             | 796<br>38                | 5                           | 97<br>96<br>38              |                  | 02<br>58<br>69              | 32<br>74<br>04              |
| 65<br>9        | BMP<br>R2        | Bone<br>morphogenetic<br>protein receptor<br>type II          | 7.<br>63<br>08<br>3 | 7.<br>63<br>12<br>7 | 7.<br>79<br>27      | 8.<br>89<br>10<br>4 | 8.<br>33<br>53<br>9 | 7.<br>82<br>34<br>9 | 1.5<br>856<br>122<br>35  | 0.6<br>650<br>4<br>35       | 1.5<br>85<br>61<br>22<br>35 | U<br>p           | 0.0<br>45<br>01<br>05<br>61 | 0.6<br>63<br>32<br>74<br>04 |
| 51<br>56       | PDG<br>FRA       | Platelet-derived<br>growth factor<br>receptor,<br>polypeptide | 6.<br>29<br>71<br>6 | 6.<br>94<br>49<br>3 | 7.<br>57<br>13<br>1 | 8.<br>81<br>06<br>7 | 8.<br>21<br>18<br>8 | 7.<br>89<br>33<br>8 | 2.5<br>802<br>484<br>71  | 1.3<br>675<br>1<br>84       | 2.5<br>80<br>24<br>84<br>71 | U<br>p           | 0.0<br>07<br>73<br>33<br>17 | 0.6<br>63<br>32<br>74<br>04 |
| 25<br>48<br>27 | NAA<br>LAD<br>L2 | N-acetylated<br>$\alpha$ -linked acidic<br>dipeptidase-like 2 | 5.<br>51<br>38<br>4 | 4.<br>85<br>46<br>9 | 5.<br>18<br>52<br>4 | 4.<br>39<br>98<br>1 | 4.<br>16<br>66<br>8 | 4.<br>58<br>94<br>7 | -1.<br>740<br>220<br>357 | -0.<br>799<br>27<br>03      | 1.7<br>40<br>22<br>03<br>57 | D<br>o<br>w<br>n | 0.0<br>06<br>79<br>30<br>12 | 0.6<br>63<br>32<br>74<br>04 |
| 57<br>45<br>3  | DSC<br>AML<br>1  | Down syndrome<br>cell adhesion<br>molecule like 1             | 6.<br>87<br>82<br>1 | 6.<br>03<br>80<br>8 | 6.<br>15<br>59<br>3 | 4.<br>22<br>57<br>9 | 4.<br>18<br>79<br>9 | 5.<br>23<br>00<br>9 | -3.<br>505<br>159<br>27  | -1.<br>809<br>48<br>92<br>7 | 3.5<br>05<br>15<br>92<br>7  | D<br>o<br>w<br>n | 0.0<br>01<br>32<br>63<br>34 | 0.6<br>63<br>32<br>74<br>04 |
| 72<br>73       | TTN              | Titin                                                         | 9.<br>30<br>06<br>7 | 8.<br>80<br>38<br>3 | 8.<br>75<br>49<br>4 | 5.<br>70<br>97<br>1 | 5.<br>90<br>17      | 8.<br>58<br>55<br>8 | -4.<br>661<br>572<br>376 | -2.<br>220<br>816<br>667    | 4.6<br>61<br>57<br>23<br>76 | D<br>o<br>w<br>n | 0.0<br>18<br>35<br>43<br>32 | 0.6<br>63<br>32<br>74<br>04 |
| 65             | ZDH              | Zinc finger,                                                  | 8.                  | 7.                  | 7.                  | 4.                  | 5.                  | 7.                  | -3.                      | -1.                         | 3.6                         | D                | 0.0                         | 0.6                         |



|    |      |                           |    |    |    |    |    |    |     |     |     |   |     |     |
|----|------|---------------------------|----|----|----|----|----|----|-----|-----|-----|---|-----|-----|
| 30 | HC11 | DHHC-type                 | 42 | 32 | 20 | 87 | 43 | 09 | 600 | 848 | 00  | o | 17  | 63  |
| 82 | B    | containing 11B            | 05 | 92 | 32 | 69 | 64 | 46 | 847 | 336 | 84  | w | 48  | 32  |
|    |      |                           | 4  | 2  | 4  | 1  | 7  | 1  | 913 | 667 | 79  | n | 68  | 74  |
|    |      |                           |    |    |    |    |    |    |     |     | 13  |   | 04  | 04  |
| 51 | NLK  | Nemo-like kinase          | 7. | 7. | 7. | 6. | 6. | 7. | -1. | -0. | 1.9 | D | 0.0 | 0.6 |
| 70 |      |                           | 89 | 62 | 82 | 21 | 85 | 36 | 958 | 969 | 58  | o | 13  | 63  |
| 1  |      |                           | 62 | 12 | 84 | 26 | 8  | 67 | 143 | 486 | 14  | w | 18  | 32  |
|    |      |                           | 3  |    | 1  | 6  |    | 2  | 733 | 667 | 37  | n | 81  | 74  |
|    |      |                           |    |    |    |    |    |    |     |     | 33  |   | 52  | 04  |
| 85 | SHA  | SH3 and multiple          | 7. | 7. | 7. | 8. | 9. | 7. | 2.1 | 1.1 | 2.1 | U | 0.0 | 0.6 |
| 35 | NK3  | ankyrin repeat            | 11 | 71 | 50 | 67 | 49 | 52 | 769 | 222 | 76  | p | 48  | 63  |
| 8  |      | domains 3                 | 22 | 07 | 32 | 10 | 25 | 95 | 123 | 833 | 91  |   | 33  | 32  |
|    |      |                           | 7  | 3  | 6  | 2  | 8  | 1  | 69  | 33  | 23  |   | 08  | 74  |
|    |      |                           |    |    |    |    |    |    |     |     | 69  |   | 44  | 04  |
| 51 | SCL  | Selenocysteine            | 7. | 6. | 6. | 5. | 6. | 6. | -1. | -0. | 1.6 | D | 0.0 | 0.6 |
| 54 | Y    | lyase                     | 20 | 87 | 83 | 83 | 29 | 66 | 626 | 701 | 26  | o | 23  | 63  |
| 0  |      |                           | 04 | 82 | 10 | 97 | 98 | 58 | 123 | 436 | 12  | w | 83  | 32  |
|    |      |                           | 4  | 1  | 7  | 2  | 7  | 2  | 315 | 667 | 33  | n | 63  | 74  |
|    |      |                           |    |    |    |    |    |    |     |     | 15  |   | 95  | 04  |
| 22 | ALD  | Aldehyde                  | 10 | 10 | 10 | 9. | 9. | 10 | -1. | -0. | 1.8 | D | 0.0 | 0.6 |
| 4  | H3A  | dehydrogenase 3           | .5 | .3 | .7 | 02 | 50 | .4 | 893 | 921 | 93  | o | 34  | 63  |
|    | 2    | family member A2          | 57 | 86 | 84 | 12 | 77 | 35 | 484 | 043 | 48  | w | 05  | 32  |
|    |      |                           | 44 | 31 | 13 | 2  | 2  | 81 | 135 | 333 | 41  | n | 02  | 74  |
|    |      |                           |    |    |    |    |    |    |     |     | 35  |   | 08  | 04  |
| 56 | PCD  | Protocadherin $\alpha$ 11 | 7. | 7. | 6. | 6. | 6. | 6. | -1. | -0. | 1.5 | D | 0.0 | 0.6 |
| 13 | HA1  |                           | 44 | 73 | 91 | 53 | 83 | 80 | 557 | 639 | 57  | o | 31  | 63  |
| 8  | 1    |                           | 20 | 45 | 29 | 69 | 18 | 31 | 526 | 256 | 52  | w | 81  | 32  |
|    |      |                           | 9  | 2  | 9  |    | 2  | 1  | 454 | 667 | 64  | n | 64  | 74  |
|    |      |                           |    |    |    |    |    |    |     |     | 54  |   | 86  | 04  |

|    |      |                        |    |    |    |    |    |    |     |     |     |   |     |     |
|----|------|------------------------|----|----|----|----|----|----|-----|-----|-----|---|-----|-----|
| 55 | PRI  | Primase, DNA,          | 4. | 4. | 4. | 5. | 5. | 4. | 1.5 | 0.6 | 1.5 | U | 0.0 | 0.6 |
| 57 | M1   | polypeptide<br>(49kda) | 35 | 24 | 89 | 49 | 17 | 83 | 935 | 722 | 93  | p | 28  | 63  |
|    |      |                        | 04 | 36 | 67 | 81 | 56 | 37 | 747 | 666 | 57  |   | 57  | 32  |
|    |      |                        | 2  | 1  | 6  | 9  | 4  | 6  | 21  | 67  | 47  |   | 79  | 74  |
|    |      |                        |    |    |    |    |    |    |     |     | 21  |   | 33  | 04  |
| 30 | ANX  | Annexin A6             | 5. | 7. | 6. | 9. | 7. | 7. | 2.6 | 1.4 | 2.6 | U | 0.0 | 0.6 |
| 9  | A6   |                        | 79 | 67 | 61 | 09 | 69 | 51 | 556 | 090 | 55  | p | 43  | 63  |
|    |      |                        | 60 | 43 | 31 | 48 | 93 | 65 | 223 | 5   | 62  |   | 72  | 32  |
|    |      |                        | 5  | 5  | 1  | 3  |    | 3  | 52  |     | 23  |   | 11  | 74  |
|    |      |                        |    |    |    |    |    |    |     |     | 52  |   | 34  | 04  |
| 70 | THB  | Thrombospondin 4       | 3. | 4. | 4. | 5. | 5. | 4. | 1.6 | 0.7 | 1.6 | U | 0.0 | 0.6 |
| 60 | S4   |                        | 98 | 72 | 07 | 31 | 10 | 55 | 567 | 283 | 56  | p | 31  | 63  |
|    |      |                        | 85 | 06 | 81 | 30 | 63 | 31 | 776 | 8   | 77  |   | 75  | 32  |
|    |      |                        | 9  | 1  | 9  | 2  | 4  | 7  | 54  |     | 76  |   | 94  | 74  |
|    |      |                        |    |    |    |    |    |    |     |     | 54  |   | 6   | 04  |
| 41 | MC   | Minichromosome         | 4. | 4. | 4. | 6. | 5. | 5. | 2.2 | 1.2 | 2.2 | U | 0.0 | 0.6 |
| 75 | M6   | maintenance            | 12 | 34 | 93 | 07 | 89 | 04 | 988 | 009 | 98  | p | 07  | 63  |
|    |      | complex                | 80 | 51 | 93 | 49 | 06 | 96 | 728 | 266 | 87  |   | 92  | 32  |
|    |      | component 6            | 7  | 1  | 2  | 9  | 8  | 1  | 4   | 67  | 28  |   | 38  | 74  |
|    |      |                        |    |    |    |    |    |    |     |     | 4   |   | 99  | 04  |
| 10 | LHF  | Lipoma HMGIC           | 5. | 7. | 7. | 9. | 8. | 7. | 3.0 | 1.6 | 3.0 | U | 0.0 | 0.6 |
| 18 | P    | fusion partner         | 36 | 19 | 34 | 30 | 11 | 35 | 857 | 256 | 85  | p | 42  | 63  |
| 6  |      |                        | 28 | 77 | 12 | 27 | 63 | 94 | 118 | 033 | 71  |   | 71  | 32  |
|    |      |                        | 1  | 2  | 1  | 6  | 8  | 1  | 22  | 33  | 18  |   | 89  | 74  |
|    |      |                        |    |    |    |    |    |    |     |     | 22  |   | 83  | 04  |
| 55 | BIN3 | Bridging integrator    | 9. | 9. | 9. | 8. | 8. | 8. | -1. | -0. | 1.5 | D | 0.0 | 0.6 |
| 90 |      | 3                      | 54 | 13 | 16 | 76 | 62 | 64 | 516 | 600 | 16  | o | 09  | 63  |
| 9  |      |                        | 01 | 29 | 29 | 03 | 88 | 48 | 413 | 663 | 41  | w | 50  | 32  |
|    |      |                        | 8  | 3  | 6  | 5  | 6  | 7  | 634 | 333 | 36  | n | 17  | 74  |

|    |      |                     |    |    |    |    |    |    |     |     |     |    |     |     |    |
|----|------|---------------------|----|----|----|----|----|----|-----|-----|-----|----|-----|-----|----|
|    |      |                     |    |    |    |    |    |    |     |     |     | 34 |     | 26  | 04 |
| 78 | CAC  | Calcium channel,    | 3. | 4. | 3. | 6. | 4. | 5. | 3.0 | 1.5 | 3.0 | U  | 0.0 | 0.6 |    |
| 3  | NB2  | voltage-dependent,  | 45 | 18 | 87 | 07 | 78 | 42 | 126 | 910 | 12  | p  | 02  | 63  |    |
|    |      | $\beta$ 2 subunit   | 18 | 19 | 83 | 69 | 17 | 66 | 853 | 5   | 68  |    | 48  | 32  |    |
|    |      |                     | 5  | 3  | 8  | 9  |    | 2  | 43  |     | 53  |    | 74  | 74  |    |
|    |      |                     |    |    |    |    |    |    |     |     | 43  |    | 28  | 04  |    |
| 26 | TIM  | Translocase of      | 7. | 6. | 6. | 6. | 6. | 6. | -1. | -0. | 1.6 | D  | 0.0 | 0.6 |    |
| 51 | M10  | inner               | 07 | 98 | 98 | 04 | 23 | 50 | 681 | 750 | 81  | o  | 03  | 63  |    |
| 5  | B    | mitochondrial       | 11 | 47 | 34 | 23 | 67 | 99 | 878 | 073 | 87  | w  | 51  | 32  |    |
|    |      | membrane 10         | 6  | 1  | 8  | 9  | 5  | 9  | 32  | 333 | 83  | n  | 42  | 74  |    |
|    |      | homolog B (yeast)   |    |    |    |    |    |    |     |     | 2   |    | 77  | 04  |    |
| 23 | FOS  | FBJ murine          | 10 | 7. | 10 | 11 | 12 | 11 | 4.3 | 2.1 | 4.3 | U  | 0.0 | 0.6 |    |
| 53 |      | osteosarcoma viral  | .1 | 62 | .6 | .2 | .1 | .5 | 980 | 368 | 98  | p  | 24  | 63  |    |
|    |      | oncogene homolog    | 84 | 65 | 71 | 19 | 13 | 59 | 885 | 766 | 08  |    | 82  | 32  |    |
|    |      |                     | 25 | 5  | 33 | 35 | 66 | 75 | 97  | 67  | 85  |    | 36  | 74  |    |
|    |      |                     |    |    |    |    |    |    |     |     | 97  |    | 89  | 04  |    |
| 46 | NAP  | Nucleosome          | 3. | 3. | 3. | 5. | 4. | 3. | 2.1 | 1.0 | 2.1 | U  | 0.0 | 0.6 |    |
| 75 | 1L3  | assembly protein    | 11 | 67 | 29 | 19 | 21 | 96 | 369 | 955 | 36  | p  | 12  | 63  |    |
|    |      | 1-like 3            | 53 | 01 | 80 | 53 | 43 | 05 | 947 | 833 | 99  |    | 20  | 32  |    |
|    |      |                     | 2  | 5  | 5  | 9  | 2  | 6  | 05  | 33  | 47  |    | 53  | 74  |    |
|    |      |                     |    |    |    |    |    |    |     |     | 05  |    | 55  | 04  |    |
| 96 | FEZ1 | Fasciculation and   | 4. | 4. | 3. | 5. | 5. | 4. | 1.6 | 0.7 | 1.6 | U  | 0.0 | 0.6 |    |
| 38 |      | elongation protein  | 05 | 81 | 98 | 41 | 16 | 55 | 921 | 588 | 92  | p  | 40  | 63  |    |
|    |      | zeta 1              | 34 | 3  | 49 | 04 | 52 | 23 | 647 | 7   | 16  |    | 84  | 32  |    |
|    |      |                     | 5  |    | 4  | 8  | 2  |    | 07  |     | 47  |    | 29  | 74  |    |
|    |      |                     |    |    |    |    |    |    |     |     | 07  |    | 07  | 04  |    |
| 91 | ZNF  | Zinc finger protein | 5. | 5. | 5. | 4. | 5. | 5. | -1. | -0. | 1.6 | D  | 0.0 | 0.6 |    |
| 12 | 682  | 682                 | 80 | 69 | 78 | 56 | 25 | 32 | 640 | 714 | 40  | o  | 16  | 63  |    |
| 0  |      |                     | 88 | 16 | 45 | 20 | 74 | 35 | 421 | 066 | 42  | w  | 83  | 32  |    |

|    |      |                       |    |    |    |    |    |    |     |     |     |     |     |     |     |
|----|------|-----------------------|----|----|----|----|----|----|-----|-----|-----|-----|-----|-----|-----|
|    |      |                       | 9  | 8  | 6  | 1  |    | 2  | 624 | 667 | 16  | n   | 54  | 74  |     |
|    |      |                       |    |    |    |    |    |    |     |     | 24  |     | 58  | 04  |     |
| 56 | ADA  | ADAM                  | 5. | 6. | 6. | 7. | 8. | 6. | 2.6 | 1.4 | 2.6 | U   | 0.0 | 0.6 |     |
| 99 | MTS  | metallopeptidase      | 67 | 60 | 13 | 75 | 52 | 42 | 929 | 292 | 92  | p   | 29  | 63  |     |
| 9  | 9    | with                  | 19 | 73 | 77 | 20 | 31 | 95 | 734 |     | 97  |     | 28  | 32  |     |
|    |      | thrombospondin        | 5  | 6  | 8  | 2  | 4  | 3  | 38  |     | 34  |     | 11  | 74  |     |
|    |      | type 1 motif 9        |    |    |    |    |    |    |     |     | 38  |     | 32  | 04  |     |
| 11 | FAM  | Family with           | 3. | 4. | 4. | 5. | 6. | 4. | 2.3 | 1.2 | 2.3 | U   | 0.0 | 0.6 |     |
| 17 | 107A | sequence similarity   | 88 | 16 | 10 | 01 | 46 | 31 | 216 | 151 | 21  | p   | 44  | 63  |     |
| 0  |      | 107 member A          | 70 | 61 | 07 | 90 | 19 | 83 | 706 | 633 | 67  |     | 01  | 32  |     |
|    |      |                       | 3  |    | 7  | 3  | 8  | 8  | 6   | 33  | 06  |     | 43  | 74  |     |
|    |      |                       |    |    |    |    |    |    |     |     | 6   |     |     | 04  |     |
| 11 | PRD  | PR domain             | 7. | 7. | 6. | 6. | 6. | 6. | -1. | -0. | 1.5 | D   | 0.0 | 0.6 |     |
| 10 | M4   | containing 4          | 40 | 27 | 96 | 28 | 73 | 68 | 561 | 643 | 61  | o   | 15  | 63  |     |
| 8  |      |                       | 74 | 35 | 31 | 79 | 74 | 93 | 684 | 103 | 68  | w   | 30  | 32  |     |
|    |      |                       | 1  | 1  | 8  | 6  | 5  | 8  | 837 | 333 | 48  | n   | 47  | 74  |     |
|    |      |                       |    |    |    |    |    |    |     |     | 37  |     | 06  | 04  |     |
| 15 | LOC  | Uncharacterized       | 3. | 3. | 3. | 4. | 5. | 3. | 2.0 | 1.0 | 2.0 | U   | 0.0 | 0.6 |     |
| 75 | 1575 | LOC157503             | 31 | 13 | 02 | 03 | 04 | 53 | 666 | 473 | 66  | p   | 21  | 63  |     |
| 03 | 03   |                       | 83 | 10 | 10 | 31 | 56 | 36 | 775 | 133 | 67  |     | 66  | 32  |     |
|    |      |                       | 5  | 4  | 9  | 8  | 1  | 3  | 8   | 33  | 75  |     | 41  | 74  |     |
|    |      |                       |    |    |    |    |    |    |     |     | 8   |     | 89  | 04  |     |
| 36 | IDO1 | Indoleamine           | 3. | 3. | 4. | 4. | 4. | 4. | 1.7 | 0.8 | 1.7 | U   | 0.0 | 0.6 |     |
| 20 |      | 2,3-dioxygenase 1     | 85 | 66 | 17 | 82 | 81 | 48 | 567 | 129 | 56  | p   | 02  | 63  |     |
|    |      |                       | 96 | 03 | 08 | 65 | 81 | 48 | 675 | 233 | 76  |     | 79  | 32  |     |
|    |      |                       | 2  | 3  | 3  | 8  | 4  | 3  | 77  | 33  | 75  |     | 27  | 74  |     |
|    |      |                       |    |    |    |    |    |    |     |     | 77  |     | 78  | 04  |     |
| 28 | DLL  | $\Delta$ -like        | 1  | 4. | 5. | 4. | 7. | 7. | 6.  | 3.8 | 1.9 | 3.8 | U   | 0.0 | 0.6 |
| 51 | 1    | ( <i>Drosophila</i> ) | 69 | 29 | 85 | 30 | 33 | 03 | 439 | 425 | 43  | p   | 01  | 63  |     |

|                |           |                                                                 |                     |                     |                     |                      |                     |                     |                         |                         |                             |        |                             |                             |
|----------------|-----------|-----------------------------------------------------------------|---------------------|---------------------|---------------------|----------------------|---------------------|---------------------|-------------------------|-------------------------|-----------------------------|--------|-----------------------------|-----------------------------|
| 4              |           |                                                                 | 60<br>4             | 33<br>2             | 25<br>5             | 02<br>2              | 42<br>4             | 51<br>9             | 245                     | 8                       | 92<br>45                    |        | 29<br>46<br>13              | 32<br>74<br>04              |
| 11<br>60<br>39 | OSR<br>2  | Odd-skipped<br>related transcription<br>factor 2                | 4.<br>06<br>66<br>8 | 3.<br>64<br>31<br>4 | 3.<br>92<br>8       | 5.<br>02<br>94<br>5  | 4.<br>54<br>84<br>3 | 4.<br>15<br>36<br>1 | 1.6<br>221<br>306<br>25 | 0.6<br>978<br>9         | 1.6<br>22<br>13<br>06<br>25 | U<br>p | 0.0<br>22<br>93<br>70<br>78 | 0.6<br>63<br>32<br>74<br>04 |
| 10<br>92<br>3  | SUB<br>1  | SUB1 homolog,<br>transcriptional<br>regulator                   | 4.<br>27<br>19<br>7 | 4.<br>09<br>26      | 4.<br>42<br>71<br>1 | 5.<br>39<br>00<br>2  | 4.<br>43<br>80<br>3 | 4.<br>76<br>43<br>4 | 1.5<br>159<br>652<br>32 | 0.6<br>002<br>366<br>67 | 1.5<br>15<br>96<br>52<br>32 | U<br>p | 0.0<br>49<br>40<br>52<br>34 | 0.6<br>63<br>32<br>74<br>04 |
| 28<br>98<br>4  | RGC<br>C  | Regulator of cell<br>cycle                                      | 5.<br>17<br>54<br>2 | 5.<br>62<br>70<br>6 | 6.<br>13<br>27<br>5 | 7.<br>28<br>23<br>7  | 8.<br>56<br>19<br>2 | 6.<br>08<br>31<br>3 | 3.1<br>690<br>783<br>61 | 1.6<br>640<br>633<br>33 | 3.1<br>69<br>07<br>83<br>61 | U<br>p | 0.0<br>26<br>76<br>55<br>69 | 0.6<br>63<br>32<br>74<br>04 |
| 25<br>30       | FUT<br>8  | Fucosyltransferase<br>8 ( $\alpha$ (1,6)<br>fucosyltransferase) | 5.<br>86<br>04<br>3 | 6.<br>17<br>29<br>2 | 5.<br>70<br>42<br>7 | 7.<br>33<br>93<br>5  | 7.<br>27<br>14<br>8 | 5.<br>97<br>21<br>2 | 1.9<br>297<br>892<br>93 | 0.9<br>484<br>433<br>33 | 1.9<br>29<br>78<br>92<br>93 | U<br>p | 0.0<br>40<br>47<br>16<br>53 | 0.6<br>63<br>32<br>74<br>04 |
| 70<br>57       | THB<br>S1 | Thrombospondin 1                                                | 5.<br>86<br>54<br>3 | 7.<br>99<br>09      | 6.<br>48<br>33<br>9 | 10<br>.9<br>56<br>07 | 8.<br>66<br>34<br>7 | 8.<br>17<br>96<br>6 | 5.6<br>041<br>413<br>07 | 2.4<br>864<br>933<br>33 | 5.6<br>04<br>14<br>13<br>07 | U<br>p | 0.0<br>18<br>51<br>98<br>61 | 0.6<br>63<br>32<br>74<br>04 |
| 83             | TMT       | Transmembrane                                                   | 4.                  | 5.                  | 5.                  | 6.                   | 6.                  | 5.                  | 2.4                     | 1.2                     | 2.4                         | U      | 0.0                         | 0.6                         |

|               |            |                                                  |                     |                     |                     |                      |                     |                     |                          |                             |                             |                  |                             |                             |
|---------------|------------|--------------------------------------------------|---------------------|---------------------|---------------------|----------------------|---------------------|---------------------|--------------------------|-----------------------------|-----------------------------|------------------|-----------------------------|-----------------------------|
| 85<br>7       | C1         | and<br>tetratricopeptide<br>repeat containing 1  | 67<br>91<br>1       | 54<br>34<br>5       | 04<br>4             | 74<br>03             | 86<br>42<br>1       | 53<br>90<br>5       | 492<br>386<br>14         | 923<br>333<br>33            | 49<br>23<br>86<br>14        | p                | 13<br>66<br>85<br>4         | 63<br>32<br>74<br>04        |
| 20<br>12      | EMP<br>1   | Epithelial<br>membrane protein<br>1              | 3.<br>90<br>22<br>7 | 3.<br>32<br>54<br>9 | 3.<br>91<br>61<br>4 | 5.<br>48<br>11<br>6  | 5.<br>49<br>83<br>6 | 4.<br>59<br>23<br>5 | 2.7<br>817<br>446<br>62  | 1.4<br>759<br>9<br>46<br>62 | 2.7<br>81<br>74<br>46<br>62 | U<br>p           | 0.0<br>01<br>51<br>46<br>33 | 0.6<br>63<br>32<br>74<br>04 |
| 56<br>14<br>1 | PCD<br>HA7 | Protocadherin $\alpha$ 7                         | 7.<br>44<br>20<br>9 | 7.<br>73<br>45<br>2 | 6.<br>91<br>29<br>9 | 6.<br>53<br>69<br>2  | 6.<br>83<br>18<br>2 | 6.<br>80<br>31<br>1 | -1.<br>557<br>526<br>454 | -0.<br>639<br>256<br>667    | 1.5<br>57<br>52<br>64<br>54 | D<br>o<br>w<br>n | 0.0<br>31<br>81<br>64<br>86 | 0.6<br>63<br>32<br>74<br>04 |
| 56<br>14<br>0 | PCD<br>HA8 | Protocadherin $\alpha$ 8                         | 7.<br>44<br>20<br>9 | 7.<br>73<br>45<br>2 | 6.<br>91<br>29<br>9 | 6.<br>53<br>69<br>2  | 6.<br>83<br>18<br>2 | 6.<br>80<br>31<br>1 | -1.<br>557<br>526<br>454 | -0.<br>639<br>256<br>667    | 1.5<br>57<br>52<br>64<br>54 | D<br>o<br>w<br>n | 0.0<br>31<br>81<br>64<br>86 | 0.6<br>63<br>32<br>74<br>04 |
| 11<br>33<br>2 | ACO<br>T7  | Acyl-coa<br>thioesterase 7                       | 5.<br>98<br>21<br>8 | 6.<br>49<br>33<br>2 | 6.<br>04<br>63<br>2 | 7.<br>67<br>57<br>4  | 7.<br>35<br>07<br>3 | 6.<br>37<br>33<br>2 | 1.9<br>443<br>977<br>01  | 0.9<br>593<br>233<br>33     | 1.9<br>44<br>39<br>77<br>01 | U<br>p           | 0.0<br>28<br>34<br>01<br>84 | 0.6<br>63<br>32<br>74<br>04 |
| 10<br>58<br>1 | IFIT<br>M2 | Interferon induced<br>transmembrane<br>protein 2 | 7.<br>67<br>36      | 8.<br>56<br>84<br>8 | 8.<br>88<br>56<br>1 | 10<br>.2<br>01<br>15 | 9.<br>99<br>83<br>6 | 8.<br>51<br>92<br>2 | 2.2<br>926<br>455<br>6   | 1.1<br>970<br>133<br>33     | 2.2<br>92<br>64<br>55<br>6  | U<br>p           | 0.0<br>49<br>00<br>11<br>28 | 0.6<br>63<br>32<br>74<br>04 |

|                |             |                                                      |                      |                      |                      |                      |                     |                      |                          |                             |                             |                  |                             |                             |
|----------------|-------------|------------------------------------------------------|----------------------|----------------------|----------------------|----------------------|---------------------|----------------------|--------------------------|-----------------------------|-----------------------------|------------------|-----------------------------|-----------------------------|
| 40<br>92       | SMA<br>D7   | SMAD family<br>member 7                              | 3.<br>80<br>07<br>6  | 4.<br>63<br>34<br>2  | 4.<br>50<br>70<br>7  | 6.<br>94<br>99<br>8  | 5.<br>30<br>6       | 4.<br>95<br>89       | 2.6<br>842<br>951<br>92  | 1.4<br>245<br>433<br>33     | 2.6<br>84<br>29<br>51<br>92 | U<br>p           | 0.0<br>28<br>76<br>73<br>56 | 0.6<br>63<br>32<br>74<br>04 |
| 14<br>45<br>81 | RPL1<br>4P1 | Ribosomal protein<br>L14 pseudogene 1                | 10<br>.7<br>61<br>29 | 10<br>.4<br>01<br>69 | 10<br>.9<br>32<br>75 | 11<br>.6<br>07<br>78 | 11<br>.2<br>38<br>4 | 11<br>.0<br>92<br>42 | 1.5<br>308<br>044<br>5   | 0.6<br>142<br>9<br>44<br>5  | 1.5<br>30<br>80<br>44       | U<br>p           | 0.0<br>21<br>88<br>94<br>54 | 0.6<br>63<br>32<br>74<br>04 |
| 56<br>34       | PRPS<br>2   | Phosphoribosyl<br>pyrophosphate<br>synthetase 2      | 7.<br>04<br>61<br>1  | 7.<br>28<br>94<br>7  | 7.<br>39<br>74<br>6  | 8.<br>36<br>15<br>4  | 7.<br>78<br>98<br>9 | 7.<br>78<br>73<br>6  | 1.6<br>646<br>859<br>13  | 0.7<br>352<br>5<br>59<br>13 | 1.6<br>64<br>68<br>59       | U<br>p           | 0.0<br>10<br>92<br>84<br>68 | 0.6<br>63<br>32<br>74<br>04 |
| 57<br>0        | BAA<br>T    | Bile<br>acid-coa:amino<br>acid<br>N-acyltransferase  | 10<br>.4<br>21<br>83 | 10<br>.3<br>07<br>16 | 10<br>.0<br>98<br>21 | 8.<br>69<br>58<br>9  | 8.<br>60<br>25<br>4 | 9.<br>89<br>17       | -2.<br>317<br>158<br>395 | -1.<br>212<br>356<br>667    | 2.3<br>17<br>15<br>83<br>95 | D<br>o<br>w<br>n | 0.0<br>10<br>15<br>56<br>85 | 0.6<br>63<br>32<br>74<br>04 |
| 23<br>46<br>4  | GCA<br>T    | Glycine<br>C-acetyltransferase                       | 6.<br>97<br>45<br>9  | 7.<br>01<br>75<br>7  | 7.<br>07<br>41<br>2  | 6.<br>38<br>79<br>3  | 5.<br>95<br>23<br>6 | 6.<br>91<br>58<br>8  | -1.<br>519<br>261<br>276 | -0.<br>603<br>37<br>276     | 1.5<br>19<br>26<br>12<br>76 | D<br>o<br>w<br>n | 0.0<br>48<br>53<br>34<br>26 | 0.6<br>63<br>32<br>74<br>04 |
| 64<br>42<br>3  | INF2        | Inverted formin,<br>FH2 and WH2<br>domain containing | 8.<br>74<br>29<br>9  | 8.<br>44<br>91<br>3  | 8.<br>25<br>53<br>7  | 7.<br>37<br>59       | 8.<br>11<br>17      | 7.<br>88<br>04<br>3  | -1.<br>616<br>813<br>568 | -0.<br>693<br>153<br>333    | 1.6<br>16<br>81<br>35       | D<br>o<br>w<br>n | 0.0<br>22<br>85<br>52       | 0.6<br>63<br>32<br>74       |

|    |      |                        |    |    |    |    |    |    |     |     |     |   |     |     |
|----|------|------------------------|----|----|----|----|----|----|-----|-----|-----|---|-----|-----|
|    |      |                        |    |    |    |    |    |    |     |     | 68  |   | 87  | 04  |
| 86 | KCN  | Potassium channel,     | 10 | 10 | 10 | 9. | 9. | 10 | -1. | -0. | 1.6 | D | 0.0 | 0.6 |
| 45 | K5   | two pore domain        | .8 | .3 | .7 | 40 | 90 | .3 | 692 | 758 | 92  | o | 21  | 63  |
|    |      | subfamily K,           | 17 | 62 | 06 | 11 | 48 | 03 | 270 | 96  | 27  | w | 68  | 32  |
|    |      | member 5               | 14 | 54 | 55 | 5  | 6  | 34 | 273 |     | 02  | n | 96  | 74  |
|    |      |                        |    |    |    |    |    |    |     |     | 73  |   | 7   | 04  |
| 18 | JAG1 | Jagged 1               | 3. | 3. | 4. | 6. | 5. | 4. | 2.9 | 1.5 | 2.9 | U | 0.0 | 0.6 |
| 2  |      |                        | 91 | 31 | 21 | 49 | 40 | 25 | 720 | 714 | 72  | p | 22  | 63  |
|    |      |                        | 34 | 21 | 69 | 20 | 50 | 98 | 945 | 8   | 09  |   | 61  | 32  |
|    |      |                        | 3  | 9  | 2  | 8  | 9  | 1  | 24  |     | 45  |   | 51  | 74  |
|    |      |                        |    |    |    |    |    |    |     |     | 24  |   | 32  | 04  |
| 66 | SPIN | Serine peptidase       | 9. | 9. | 9. | 8. | 8. | 9. | -1. | -0. | 1.6 | D | 0.0 | 0.6 |
| 92 | T1   | inhibitor, Kunitz      | 83 | 53 | 27 | 37 | 78 | 22 | 685 | 753 | 85  | o | 22  | 63  |
|    |      | type 1                 | 61 | 20 | 17 | 25 | 45 | 25 | 873 | 496 | 87  | w | 92  | 32  |
|    |      |                        | 9  | 6  | 9  | 1  | 2  | 2  | 943 | 667 | 39  | n | 28  | 74  |
|    |      |                        |    |    |    |    |    |    |     |     | 43  |   | 31  | 04  |
| 60 | RGS  | Regulator of           | 3. | 4. | 3. | 4. | 4. | 4. | 1.9 | 0.9 | 1.9 | U | 0.0 | 0.6 |
| 03 | 13   | G-protein signaling    | 53 | 12 | 34 | 56 | 69 | 60 | 428 | 581 | 42  | p | 02  | 63  |
|    |      | 13                     | 89 | 14 | 01 | 84 | 96 | 69 | 753 | 933 | 87  |   | 60  | 32  |
|    |      |                        | 2  | 4  |    | 5  | 5  | 4  | 35  | 33  | 53  |   | 88  | 74  |
|    |      |                        |    |    |    |    |    |    |     |     | 35  |   | 53  | 04  |
| 56 | ANK  | Ankyrin repeat and     | 5. | 5. | 4. | 4. | 4. | 4. | -1. | -0. | 1.7 | D | 0.0 | 0.6 |
| 89 | S1B  | sterile $\alpha$ motif | 81 | 54 | 80 | 12 | 62 | 91 | 781 | 833 | 81  | o | 33  | 63  |
| 9  |      | domain containing      | 93 | 49 | 19 | 53 | 58 | 49 | 879 | 4   | 87  | w | 09  | 32  |
|    |      | 1B                     | 5  | 6  | 9  | 3  | 4  | 3  | 775 |     | 97  | n | 85  | 74  |
|    |      |                        |    |    |    |    |    |    |     |     | 75  |   | 14  | 04  |
| 2  | A2M  | A-2-macroglobulin      | 8. | 10 | 10 | 11 | 11 | 10 | 2.8 | 1.5 | 2.8 | U | 0.0 | 0.6 |
|    |      |                        | 86 | .4 | .0 | .6 | .3 | .9 | 836 | 279 | 83  | p | 08  | 63  |
|    |      |                        | 74 | 97 | 69 | 96 | 94 | 27 | 978 | 2   | 69  |   | 83  | 32  |



|    |      |                            |    |    |    |    |    |    |     |     |     |   |     |     |
|----|------|----------------------------|----|----|----|----|----|----|-----|-----|-----|---|-----|-----|
|    |      |                            | 4  |    | 7  | 44 | 39 | 07 | 32  |     | 78  |   | 28  | 74  |
|    |      |                            |    |    |    |    |    |    |     |     | 32  |   | 37  | 04  |
| 46 | MYH  | Myosin, heavy              | 6. | 6. | 7. | 7. | 7. | 7. | 1.5 | 0.6 | 1.5 | U | 0.0 | 0.6 |
| 27 | 9    | chain 9,                   | 87 | 53 | 05 | 99 | 19 | 22 | 676 | 486 | 67  | p | 45  | 63  |
|    |      | non-muscle                 | 01 | 83 | 71 | 50 | 43 | 21 | 860 | 366 | 68  |   | 71  | 32  |
|    |      |                            | 7  |    |    | 5  |    | 3  | 47  | 67  | 60  |   | 53  | 74  |
|    |      |                            |    |    |    |    |    |    |     |     | 47  |   | 08  | 04  |
| 12 | COL  | Collagen, type IV,         | 7. | 7. | 7. | 6. | 6. | 6. | -1. | -0. | 1.6 | D | 0.0 | 0.6 |
| 86 | 4A4  | $\alpha$ 4                 | 55 | 08 | 08 | 41 | 20 | 82 | 694 | 761 | 94  | o | 12  | 63  |
|    |      |                            | 29 | 99 | 92 | 00 | 90 | 97 | 739 | 063 | 73  | w | 40  | 32  |
|    |      |                            | 6  | 1  | 3  | 8  | 4  | 9  | 266 | 333 | 92  | n | 70  | 74  |
|    |      |                            |    |    |    |    |    |    |     |     | 66  |   | 36  | 04  |
| 38 | VGL  | Vestigial like             | 3. | 4. | 4. | 6. | 4. | 4. | 2.2 | 1.1 | 2.2 | U | 0.0 | 0.6 |
| 91 | L3   | family member 3            | 50 | 82 | 21 | 26 | 85 | 97 | 678 | 813 | 67  | p | 38  | 63  |
| 36 |      |                            | 21 | 95 | 73 | 28 | 50 | 51 | 260 | 1   | 82  |   | 17  | 32  |
|    |      |                            | 1  | 8  | 7  | 2  | 4  | 3  | 74  |     | 60  |   | 93  | 74  |
|    |      |                            |    |    |    |    |    |    |     |     | 74  |   | 41  | 04  |
| 12 | COL  | Collagen, type V, $\alpha$ | 5. | 7. | 5. | 9. | 7. | 7. | 3.6 | 1.8 | 3.6 | U | 0.0 | 0.6 |
| 89 | 5A1  | 1                          | 14 | 14 | 88 | 61 | 11 | 09 | 847 | 815 | 84  | p | 47  | 63  |
|    |      |                            | 93 | 91 | 79 | 96 | 22 | 94 | 583 | 7   | 75  |   | 33  | 32  |
|    |      |                            | 9  | 9  | 9  | 2  | 1  | 5  | 27  |     | 83  |   | 83  | 74  |
|    |      |                            |    |    |    |    |    |    |     |     | 27  |   | 33  | 04  |
| 79 | GAL  | Polypeptide                | 5. | 5. | 5. | 3. | 5. | 4. | -2. | -1. | 2.5 | D | 0.0 | 0.6 |
| 62 | NT14 | N-acetylgalactosa          | 92 | 69 | 37 | 31 | 30 | 37 | 516 | 331 | 16  | o | 24  | 63  |
| 3  |      | minyltransferase           | 63 | 66 | 16 | 83 | 95 | 24 | 490 | 413 | 49  | w | 99  | 32  |
|    |      | 14                         | 4  |    |    | 5  | 3  | 2  | 817 | 333 | 08  | n | 78  | 74  |
|    |      |                            |    |    |    |    |    |    |     |     | 17  |   | 28  | 04  |
| 48 | NGF  | Nerve growth               | 4. | 5. | 4. | 5. | 5. | 5. | 1.6 | 0.6 | 1.6 | U | 0.0 | 0.6 |
| 04 | R    | factor receptor            | 56 | 08 | 83 | 70 | 80 | 03 | 156 | 921 | 15  | p | 28  | 63  |

|               |            |                                              |                     |                     |                     |                     |                     |                     |                          |                          |                             |                  |                             |                             |
|---------------|------------|----------------------------------------------|---------------------|---------------------|---------------------|---------------------|---------------------|---------------------|--------------------------|--------------------------|-----------------------------|------------------|-----------------------------|-----------------------------|
|               |            |                                              | 02<br>4             | 12<br>1             | 32<br>5             | 42<br>7             | 90<br>1             | 77<br>4             | 410<br>04                | 066<br>67                | 64<br>10<br>04              |                  | 36<br>01<br>45              | 32<br>74<br>04              |
| 84<br>81      | OFD<br>1   | Oral-facial-digital<br>syndrome 1            | 8.<br>23<br>83<br>3 | 8.<br>20<br>41<br>7 | 7.<br>77<br>10<br>7 | 7.<br>00<br>12<br>6 | 7.<br>25<br>09<br>6 | 7.<br>44<br>60<br>8 | -1.<br>788<br>119<br>721 | -0.<br>838<br>443<br>333 | 1.7<br>88<br>11<br>97<br>21 | D<br>o<br>w<br>n | 0.0<br>04<br>40<br>29<br>09 | 0.6<br>63<br>32<br>74<br>04 |
| 56<br>14<br>5 | PCD<br>HA3 | Protocadherin $\alpha$ 3                     | 7.<br>44<br>20<br>9 | 7.<br>73<br>45<br>2 | 6.<br>91<br>29<br>9 | 6.<br>53<br>69<br>2 | 6.<br>83<br>18<br>2 | 6.<br>80<br>31<br>1 | -1.<br>557<br>526<br>454 | -0.<br>639<br>256<br>667 | 1.5<br>57<br>52<br>64<br>54 | D<br>o<br>w<br>n | 0.0<br>31<br>81<br>64<br>86 | 0.6<br>63<br>32<br>74<br>04 |
| 70<br>10      | TEK        | TEK tyrosine<br>kinase, endothelial          | 4.<br>54<br>22<br>6 | 5.<br>20<br>05<br>1 | 5.<br>23<br>90<br>4 | 7.<br>11<br>55<br>2 | 7.<br>43<br>46<br>2 | 5.<br>53<br>31<br>2 | 3.2<br>500<br>832<br>36  | 1.7<br>004<br>766<br>67  | 3.2<br>50<br>08<br>32<br>36 | U<br>p           | 0.0<br>10<br>89<br>30<br>32 | 0.6<br>63<br>32<br>74<br>04 |
| 39<br>12      | LAM<br>B1  | Laminin subunit $\beta$<br>1                 | 7.<br>83<br>61<br>5 | 8.<br>05<br>81<br>4 | 7.<br>44<br>67<br>4 | 9.<br>24<br>77<br>1 | 9.<br>22<br>03<br>6 | 8.<br>11<br>60<br>6 | 2.1<br>155<br>410<br>3   | 1.0<br>810<br>266<br>67  | 2.1<br>15<br>54<br>10<br>3  | U<br>p           | 0.0<br>15<br>58<br>09<br>12 | 0.6<br>63<br>32<br>74<br>04 |
| 55<br>92      | PRK<br>G1  | Protein kinase,<br>cgmp-dependent,<br>type I | 4.<br>25<br>21      | 4.<br>69<br>27<br>9 | 3.<br>46<br>62<br>7 | 6.<br>63<br>50<br>3 | 5.<br>10<br>50<br>3 | 4.<br>80<br>92<br>3 | 2.6<br>060<br>775<br>22  | 1.3<br>818<br>8<br>22    | 2.6<br>06<br>07<br>75<br>22 | U<br>p           | 0.0<br>33<br>04<br>09<br>31 | 0.6<br>63<br>32<br>74<br>04 |
| 12            | MBO        | Membrane bound                               | 4.                  | 4.                  | 4.                  | 5.                  | 5.                  | 4.                  | 1.7                      | 0.7                      | 1.7                         | U                | 0.0                         | 0.6                         |

|    |     |                    |    |    |    |    |    |    |     |     |     |   |     |     |
|----|-----|--------------------|----|----|----|----|----|----|-----|-----|-----|---|-----|-----|
| 96 | AT2 | O-acyltransferase  | 75 | 46 | 67 | 85 | 69 | 70 | 284 | 894 | 28  | p | 36  | 63  |
| 42 |     | domain containing  | 05 | 56 | 50 | 56 | 77 | 62 | 353 | 666 | 43  |   | 97  | 32  |
|    |     | 2                  | 8  | 4  | 1  | 2  | 6  | 5  | 79  | 67  | 53  |   | 54  | 74  |
|    |     |                    |    |    |    |    |    |    |     |     | 79  |   | 61  | 04  |
| 55 | SCY | SCY1-like,         | 8. | 7. | 8. | 7. | 7. | 7. | -1. | -0. | 1.5 | D | 0.0 | 0.6 |
| 68 | L2  | kinase-like 2      | 47 | 84 | 07 | 13 | 59 | 74 | 555 | 637 | 55  | o | 32  | 63  |
| 1  |     |                    | 32 | 43 | 71 | 33 | 91 | 96 | 667 | 533 | 66  | w | 67  | 32  |
|    |     |                    | 4  | 8  | 9  | 4  | 9  | 8  | 062 | 333 | 70  | n | 88  | 74  |
|    |     |                    |    |    |    |    |    |    |     |     | 62  |   | 21  | 04  |
| 55 | ACS | Acyl-coa           | 8. | 8. | 8. | 7. | 8. | 8. | -1. | -0. | 1.5 | D | 0.0 | 0.6 |
| 90 | S2  | synthetase         | 76 | 67 | 44 | 71 | 00 | 19 | 573 | 654 | 73  | o | 09  | 63  |
| 2  |     | short-chain family | 02 | 17 | 94 | 99 | 38 | 52 | 619 | 086 | 61  | w | 54  | 32  |
|    |     | member 2           |    |    | 3  | 5  | 9  | 3  | 42  | 667 | 94  | n | 43  | 74  |
|    |     |                    |    |    |    |    |    |    |     |     | 2   |   | 91  | 04  |
| 94 | AKA | A-kinase anchoring | 8. | 8. | 9. | 7. | 7. | 8. | -2. | -1. | 2.2 | D | 0.0 | 0.6 |
| 65 | P7  | protein 7          | 93 | 77 | 37 | 51 | 90 | 10 | 280 | 189 | 80  | o | 01  | 63  |
|    |     |                    | 66 | 88 | 42 | 54 | 27 | 35 | 499 | 35  | 49  | w | 33  | 32  |
|    |     |                    | 2  | 8  | 4  | 8  | 1  |    | 731 |     | 97  | n | 11  | 74  |
|    |     |                    |    |    |    |    |    |    |     |     | 31  |   | 55  | 04  |
| 88 | FCG | Fc fragment of igg | 13 | 13 | 13 | 11 | 13 | 11 | -2. | -1. | 2.2 | D | 0.0 | 0.6 |
| 57 | BP  | binding protein    | .2 | .1 | .2 | .6 | .1 | .3 | 230 | 157 | 30  | o | 35  | 63  |
|    |     |                    | 20 | 26 | 97 | 28 | 72 | 71 | 195 | 17  | 19  | w | 01  | 32  |
|    |     |                    | 12 | 21 | 94 | 53 | 97 | 26 | 217 |     | 52  | n | 58  | 74  |
|    |     |                    |    |    |    |    |    |    |     |     | 17  |   | 6   | 04  |
| 23 | ARH | Rho/Rac guanine    | 9. | 9. | 9. | 8. | 8. | 9. | -1. | -0. | 1.6 | D | 0.0 | 0.6 |
| 37 | GEF | nucleotide         | 65 | 41 | 49 | 50 | 73 | 23 | 616 | 692 | 16  | o | 15  | 63  |
| 0  | 18  | exchange factor 18 | 59 | 04 | 19 | 99 | 75 | 23 | 454 | 833 | 45  | w | 02  | 32  |
|    |     |                    | 4  | 9  | 8  | 8  | 5  | 8  | 987 | 333 | 49  | n | 07  | 74  |
|    |     |                    |    |    |    |    |    |    |     |     | 87  |   | 76  | 04  |

|    |      |                           |    |    |    |    |    |    |     |     |     |   |     |     |
|----|------|---------------------------|----|----|----|----|----|----|-----|-----|-----|---|-----|-----|
| 35 | CXC  | Chemokine                 | 4. | 4. | 4. | 5. | 7. | 4. | 2.5 | 1.3 | 2.5 | U | 0.0 | 0.6 |
| 76 | L8   | (C-X-C motif)<br>ligand 8 | 26 | 62 | 44 | 67 | 06 | 60 | 210 | 340 | 21  | p | 48  | 63  |
|    |      |                           | 59 | 09 | 47 | 27 | 04 | 05 | 359 | 166 | 03  |   | 23  | 32  |
|    |      |                           | 7  | 6  | 6  | 6  | 5  | 3  | 07  | 67  | 59  |   | 23  | 74  |
|    |      |                           |    |    |    |    |    |    |     |     | 07  |   | 84  | 04  |
| 22 | PTG  | Prostaglandin             | 10 | 9. | 10 | 8. | 9. | 10 | -2. | -1. | 2.0 | D | 0.0 | 0.6 |
| 94 | R1   | reductase 1               | .7 | 73 | .4 | 65 | 06 | .1 | 043 | 031 | 43  | o | 42  | 63  |
| 9  |      |                           | 03 | 72 | 82 | 17 | 20 | 15 | 912 | 333 | 91  | w | 93  | 32  |
|    |      |                           | 51 |    | 9  | 3  | 3  | 85 | 355 | 333 | 23  | n | 06  | 74  |
|    |      |                           |    |    |    |    |    |    |     |     | 55  |   | 43  | 04  |
| 87 | PAB  | Poly(A) binding           | 6. | 6. | 6. | 7. | 6. | 6. | 1.9 | 0.9 | 1.9 | U | 0.0 | 0.6 |
| 61 | PC4  | protein,                  | 02 | 02 | 63 | 99 | 84 | 81 | 868 | 904 | 86  | p | 27  | 63  |
|    |      | cytoplasmic               | 38 | 98 | 00 | 30 | 30 | 9  | 046 | 5   | 80  |   | 70  | 32  |
|    |      | (inducible form)          | 3  | 3  | 4  | 1  | 4  |    | 11  |     | 46  |   | 09  | 74  |
|    |      |                           |    |    |    |    |    |    |     |     | 11  |   | 33  | 04  |
| 40 | M6P  | Mannose-6-phosph          | 7. | 6. | 7. | 8. | 7. | 7. | 1.5 | 0.6 | 1.5 | U | 0.0 | 0.6 |
| 74 | R    | ate receptor (cation      | 23 | 83 | 50 | 01 | 64 | 77 | 391 | 221 | 39  | p | 24  | 63  |
|    |      | dependent)                | 33 | 69 | 88 | 77 | 84 | 93 | 281 | 133 | 12  |   | 33  | 32  |
|    |      |                           | 5  | 1  | 9  | 4  | 5  |    | 24  | 33  | 81  |   | 43  | 74  |
|    |      |                           |    |    |    |    |    |    |     |     | 24  |   | 08  | 04  |
| 57 | KIA  | KIAA1456                  | 7. | 7. | 7. | 5. | 6. | 7. | -2. | -1. | 2.0 | D | 0.0 | 0.6 |
| 60 | A145 |                           | 59 | 01 | 49 | 46 | 43 | 07 | 058 | 041 | 58  | o | 36  | 63  |
| 4  | 6    |                           | 59 | 48 | 86 | 94 | 76 | 75 | 523 | 61  | 52  | w | 14  | 32  |
|    |      |                           | 8  | 4  | 7  | 1  | 8  | 7  | 616 |     | 36  | n | 18  | 74  |
|    |      |                           |    |    |    |    |    |    |     |     | 16  |   | 57  | 04  |
| 26 | HEY  | Hes-related family        | 3. | 4. | 3. | 5. | 5. | 4. | 2.7 | 1.4 | 2.7 | U | 0.0 | 0.6 |
| 50 | L    | bhlh transcription        | 31 | 33 | 98 | 58 | 98 | 49 | 843 | 773 | 84  | p | 10  | 63  |
| 8  |      | factor with YRPW          | 83 | 92 | 32 | 91 | 80 | 57 | 681 | 5   | 36  |   | 08  | 32  |
|    |      | motif-like                | 5  | 7  | 5  | 1  | 4  | 7  | 94  |     | 81  |   | 00  | 74  |

|    |      |                        |    |    |    |    |    |    |     |     |     |    |     |     |    |
|----|------|------------------------|----|----|----|----|----|----|-----|-----|-----|----|-----|-----|----|
|    |      |                        |    |    |    |    |    |    |     |     |     | 94 |     | 6   | 04 |
| 22 | DZIP | DAZ interacting        | 4. | 5. | 4. | 6. | 5. | 5. | 2.3 | 1.2 | 2.3 | U  | 0.0 | 0.6 |    |
| 87 | 1    | zinc finger protein    | 16 | 06 | 45 | 34 | 97 | 02 | 233 | 162 | 23  | p  | 15  | 63  |    |
| 3  |      | 1                      | 86 | 84 | 81 | 43 | 89 | 04 | 502 | 066 | 35  |    | 40  | 32  |    |
|    |      |                        | 3  | 6  | 2  | 8  | 9  | 6  | 61  | 67  | 02  |    | 54  | 74  |    |
|    |      |                        |    |    |    |    |    |    |     |     | 61  |    | 6   | 04  |    |
| 51 | RAS  | RAS-like, family       | 4. | 6. | 5. | 7. | 6. | 6. | 3.1 | 1.6 | 3.1 | U  | 0.0 | 0.6 |    |
| 28 | L12  | 12                     | 31 | 26 | 04 | 51 | 66 | 40 | 445 | 528 | 44  | p  | 15  | 63  |    |
| 5  |      |                        | 43 | 03 | 58 | 23 | 07 | 60 | 858 | 7   | 58  |    | 01  | 32  |    |
|    |      |                        | 3  | 5  | 7  | 7  | 1  | 8  |     |     | 58  |    | 01  | 74  |    |
|    |      |                        |    |    |    |    |    |    |     |     |     |    | 04  | 04  |    |
| 40 | TNF  | TNFSF12-TNFSF1         | 10 | 10 | 11 | 10 | 9. | 10 | -1. | -0. | 1.5 | D  | 0.0 | 0.6 |    |
| 79 | SF12 | 3 readthrough          | .7 | .3 | .0 | .0 | 86 | .3 | 566 | 647 | 66  | o  | 25  | 63  |    |
| 77 | -TNF |                        | 36 | 75 | 80 | 39 | 36 | 48 | 067 | 146 | 06  | w  | 13  | 32  |    |
|    | SF13 |                        | 66 | 99 | 84 | 84 | 1  | 6  | 793 | 667 | 77  | n  | 84  | 74  |    |
|    |      |                        |    |    |    |    |    |    |     |     | 93  |    | 39  | 04  |    |
| 40 | SAM  | Sterile $\alpha$ motif | 8. | 8. | 8. | 7. | 8. | 8. | -1. | -0. | 1.5 | D  | 0.0 | 0.6 |    |
| 14 | D12  | domain containing      | 76 | 75 | 66 | 79 | 15 | 41 | 524 | 608 | 24  | o  | 16  | 63  |    |
| 74 |      | 12                     | 54 | 40 | 80 | 26 | 63 | 32 | 613 | 443 | 61  | w  | 29  | 32  |    |
|    |      |                        | 1  | 8  | 9  | 4  | 2  | 9  | 265 | 333 | 32  | n  | 39  | 74  |    |
|    |      |                        |    |    |    |    |    |    |     |     | 65  |    | 89  | 04  |    |
| 10 | EDA  | Ectodysplasin A        | 4. | 5. | 5. | 6. | 5. | 5. | 1.6 | 0.6 | 1.6 | U  | 0.0 | 0.6 |    |
| 91 | R    | receptor               | 96 | 43 | 20 | 18 | 96 | 53 | 152 | 917 | 15  | p  | 17  | 63  |    |
| 3  |      |                        | 27 | 95 | 40 | 65 | 36 | 14 | 490 | 566 | 24  |    | 56  | 32  |    |
|    |      |                        | 4  | 5  | 7  | 4  | 7  | 2  | 95  | 67  | 90  |    | 00  | 74  |    |
|    |      |                        |    |    |    |    |    |    |     |     | 95  |    | 35  | 04  |    |
| 39 | FAD  | Fatty acid             | 4. | 6. | 5. | 7. | 6. | 5. | 2.0 | 1.0 | 2.0 | U  | 0.0 | 0.6 |    |
| 92 | S1   | desaturase 1           | 85 | 34 | 35 | 02 | 78 | 95 | 971 | 684 | 97  | p  | 43  | 63  |    |
|    |      |                        | 79 | 15 | 68 | 95 | 09 | 11 | 160 | 066 | 11  |    | 20  | 32  |    |



|    |      |                     |    |    |    |    |    |    |     |     |     |   |     |     |
|----|------|---------------------|----|----|----|----|----|----|-----|-----|-----|---|-----|-----|
| 86 | EIF3 | Eukaryotic          | 8. | 7. | 8. | 9. | 8. | 8. | 1.8 | 0.8 | 1.8 | U | 0.0 | 0.6 |
| 67 | H    | translation         | 22 | 42 | 41 | 33 | 35 | 93 | 101 | 561 | 10  | p | 40  | 63  |
|    |      | initiation factor 3 | 77 | 12 | 21 | 86 | 84 | 24 | 843 | 366 | 18  |   | 99  | 32  |
|    |      | subunit H           | 7  | 8  | 4  | 7  | 6  | 7  | 97  | 67  | 43  |   | 56  | 74  |
|    |      |                     |    |    |    |    |    |    |     |     | 97  |   | 94  | 04  |
| 18 | GPR  | G protein-coupled   | 2. | 4. | 4. | 5. | 4. | 4. | 2.4 | 1.2 | 2.4 | U | 0.0 | 0.6 |
| 80 | 183  | receptor 183        | 82 | 43 | 00 | 51 | 88 | 73 | 487 | 920 | 48  | p | 17  | 63  |
|    |      |                     | 90 | 03 | 06 | 69 | 24 | 68 | 859 | 666 | 78  |   | 92  | 32  |
|    |      |                     | 3  |    | 5  | 5  | 3  |    | 4   | 67  | 59  |   | 77  | 74  |
|    |      |                     |    |    |    |    |    |    |     |     | 4   |   | 05  | 04  |
| 64 | AID  | Axin interactor,    | 4. | 4. | 5. | 5. | 5. | 5. | 1.5 | 0.6 | 1.5 | U | 0.0 | 0.6 |
| 85 | A    | dorsalization       | 94 | 71 | 56 | 62 | 62 | 84 | 465 | 290 | 46  | p | 34  | 63  |
| 3  |      | associated          | 21 | 11 | 34 | 92 | 97 | 47 | 069 | 133 | 50  |   | 40  | 32  |
|    |      |                     | 8  |    | 3  | 4  | 9  | 2  | 68  | 33  | 69  |   | 23  | 74  |
|    |      |                     |    |    |    |    |    |    |     |     | 68  |   | 68  | 04  |
| 55 | TTC  | Tetratricopeptide   | 8. | 8. | 8. | 7. | 7. | 8. | -1. | -0. | 1.6 | D | 0.0 | 0.6 |
| 02 | 38   | repeat domain 38    | 63 | 26 | 42 | 61 | 23 | 36 | 631 | 705 | 31  | o | 49  | 63  |
| 0  |      |                     | 43 | 47 | 79 | 58 | 06 | 30 | 011 | 766 | 011 | w | 10  | 32  |
|    |      |                     | 3  | 2  |    | 9  | 8  | 8  | 175 | 667 | 17  | n | 44  | 74  |
|    |      |                     |    |    |    |    |    |    |     |     | 5   |   | 12  | 04  |
| 33 | ID1  | Inhibitor of DNA    | 8. | 6. | 7. | 8. | 10 | 8. | 4.3 | 2.1 | 4.3 | U | 0.0 | 0.6 |
| 97 |      | binding 1,          | 42 | 81 | 01 | 93 | .8 | 87 | 673 | 267 | 67  | p | 12  | 63  |
|    |      | dominant negative   | 79 | 58 | 72 | 60 | 31 | 35 | 152 | 466 | 31  |   | 05  | 32  |
|    |      | helix-loop-helix    | 4  | 4  | 4  | 6  | 62 | 8  | 27  | 67  | 52  |   | 08  | 74  |
|    |      | protein             |    |    |    |    |    |    |     |     | 27  |   | 22  | 04  |
| 57 | LRC  | Leucine-rich        | 3. | 3. | 3. | 5. | 4. | 3. | 2.2 | 1.1 | 2.2 | U | 0.0 | 0.6 |
| 63 | H2   | repeats and         | 32 | 11 | 00 | 03 | 17 | 74 | 544 | 727 | 54  | p | 07  | 63  |
| 1  |      | calponin homology   | 10 | 47 | 15 | 89 | 52 | 15 | 622 | 833 | 46  |   | 16  | 32  |
|    |      | (CH) domain         | 2  | 2  | 7  | 4  | 2  |    | 19  | 33  | 22  |   | 65  | 74  |

|    |      |                              |    |    |    |    |    |    |     |     |     |   |     |     |
|----|------|------------------------------|----|----|----|----|----|----|-----|-----|-----|---|-----|-----|
|    |      | containing 2                 |    |    |    |    |    |    |     |     | 19  |   | 95  | 04  |
| 34 | IDH2 | Isocitrate                   | 6. | 6. | 5. | 5. | 5. | 5. | -1. | -0. | 1.5 | D | 0.0 | 0.6 |
| 18 |      | dehydrogenase 2              | 57 | 58 | 96 | 82 | 67 | 81 | 518 | 602 | 18  | o | 24  | 63  |
|    |      | (NADP+),                     | 83 | 20 | 44 | 77 | 63 | 30 | 390 | 543 | 39  | w | 43  | 32  |
|    |      | mitochondrial                | 6  | 4  |    | 5  | 3  | 9  | 986 | 333 | 09  | n | 14  | 74  |
|    |      |                              |    |    |    |    |    |    |     |     | 86  |   | 9   | 04  |
| 88 | ST3  | ST3 $\beta$ -galactoside     | 9. | 8. | 9. | 7. | 8. | 8. | -1. | -0. | 1.8 | D | 0.0 | 0.6 |
| 69 | GAL  | $\alpha$ -2,3-sialyltransfer | 32 | 75 | 18 | 43 | 42 | 80 | 822 | 865 | 22  | o | 47  | 63  |
| 5  |      | ase 5                        | 08 | 68 | 70 | 73 | 49 | 49 | 450 | 88  | 45  | w | 02  | 32  |
|    |      |                              | 1  | 8  | 6  |    |    | 1  | 968 |     | 09  | n | 96  | 74  |
|    |      |                              |    |    |    |    |    |    |     |     | 68  |   | 96  | 04  |
| 91 | NEX  | Nexilin (F actin             | 3. | 6. | 4. | 8. | 5. | 6. | 4.7 | 2.2 | 4.7 | U | 0.0 | 0.6 |
| 62 | N    | binding protein)             | 51 | 17 | 35 | 59 | 96 | 28 | 975 | 622 | 97  | p | 35  | 63  |
| 4  |      |                              | 85 | 66 | 72 | 10 | 81 | 01 | 128 | 866 | 51  |   | 64  | 32  |
|    |      |                              | 7  | 9  | 8  | 7  | 4  | 9  | 37  | 67  | 28  |   | 86  | 74  |
|    |      |                              |    |    |    |    |    |    |     |     | 37  |   | 68  | 04  |
| 40 | HAC  | 3-hydroxyacyl-coa            | 3. | 5. | 4. | 6. | 5. | 4. | 2.5 | 1.3 | 2.5 | U | 0.0 | 0.6 |
| 14 | D4   | dehydratase 4                | 66 | 12 | 07 | 31 | 80 | 73 | 166 | 315 | 16  | p | 31  | 63  |
| 94 |      |                              | 57 | 01 | 74 | 45 | 47 | 85 | 536 | 066 | 65  |   | 26  | 32  |
|    |      |                              | 7  |    |    |    | 4  | 5  | 24  | 67  | 36  |   | 27  | 74  |
|    |      |                              |    |    |    |    |    |    |     |     | 24  |   | 89  | 04  |
| 51 | PEG  | Paternally                   | 4. | 5. | 5. | 6. | 6. | 6. | 1.7 | 0.7 | 1.7 | U | 0.0 | 0.6 |
| 78 | 3    | expressed 3                  | 75 | 83 | 75 | 16 | 22 | 31 | 219 | 840 | 21  | p | 33  | 63  |
|    |      |                              | 64 | 86 | 56 | 68 | 53 | 05 | 023 | 033 | 90  |   | 82  | 32  |
|    |      |                              | 7  | 6  |    | 6  | 3  | 5  | 55  | 33  | 23  |   | 65  | 74  |
|    |      |                              |    |    |    |    |    |    |     |     | 55  |   | 98  | 04  |
| 58 | JAM  | Junctional                   | 4. | 5. | 5. | 7. | 6. | 5. | 2.9 | 1.5 | 2.9 | U | 0.0 | 0.6 |
| 49 | 2    | adhesion molecule            | 04 | 05 | 16 | 00 | 82 | 15 | 785 | 746 | 78  | p | 21  | 63  |
| 4  |      |                              | 12 | 01 | 89 | 20 | 66 | 53 | 289 |     | 52  |   | 97  | 32  |



|    |      |                        |    |    |    |    |    |    |     |     |     |   |     |     |
|----|------|------------------------|----|----|----|----|----|----|-----|-----|-----|---|-----|-----|
|    |      |                        | 8  | 1  | 1  | 2  | 9  | 9  | 88  |     | 89  |   | 64  | 74  |
|    |      |                        |    |    |    |    |    |    |     |     | 88  |   | 85  | 04  |
| 55 | ADI1 | Acireductone           | 11 | 11 | 11 | 11 | 10 | 11 | -1. | -0. | 1.6 | D | 0.0 | 0.6 |
| 25 |      | dioxygenase 1          | .7 | .6 | .7 | .0 | .5 | .5 | 634 | 708 | 34  | o | 28  | 63  |
| 6  |      |                        | 88 | 60 | 58 | 02 | 30 | 48 | 485 | 836 | 48  | w | 40  | 32  |
|    |      |                        | 37 | 87 | 2  |    | 33 | 6  | 6   | 667 | 56  | n | 64  | 74  |
|    |      |                        |    |    |    |    |    |    |     |     |     |   | 49  | 04  |
| 15 | FAA  | Fatty acid amide       | 6. | 6. | 6. | 5. | 5. | 5. | -1. | -0. | 1.5 | D | 0.0 | 0.6 |
| 85 | H2   | hydrolase 2            | 21 | 21 | 13 | 40 | 57 | 56 | 597 | 676 | 97  | o | 02  | 63  |
| 84 |      |                        | 77 | 77 | 36 | 19 | 24 | 66 | 773 | 063 | 77  | w | 32  | 32  |
|    |      |                        | 8  | 8  | 6  | 4  | 2  | 7  | 973 | 333 | 39  | n | 15  | 74  |
|    |      |                        |    |    |    |    |    |    |     |     | 73  |   | 71  | 04  |
| 57 | ALP  | A kinase 3             | 6. | 5. | 5. | 4. | 5. | 4. | -1. | -0. | 1.8 | D | 0.0 | 0.6 |
| 53 | K3   |                        | 34 | 54 | 63 | 47 | 47 | 95 | 832 | 873 | 32  | o | 28  | 63  |
| 8  |      |                        | 08 | 34 | 65 | 57 | 27 | 06 | 555 | 856 | 55  | w | 62  | 32  |
|    |      |                        | 6  | 5  | 1  | 9  | 8  | 8  | 214 | 667 | 52  | n | 56  | 74  |
|    |      |                        |    |    |    |    |    |    |     |     | 14  |   | 77  | 04  |
| 23 | SYT1 | Synaptotagmin 11       | 4. | 5. | 4. | 6. | 6. | 4. | 2.6 | 1.4 | 2.6 | U | 0.0 | 0.6 |
| 20 | 1    |                        | 00 | 43 | 17 | 85 | 15 | 83 | 593 | 110 | 59  | p | 44  | 63  |
| 8  |      |                        | 90 | 57 | 64 | 87 | 85 | 70 | 002 | 466 | 30  |   | 44  | 32  |
|    |      |                        | 4  | 2  | 5  | 1  | 5  | 9  | 35  | 67  | 02  |   | 12  | 74  |
|    |      |                        |    |    |    |    |    |    |     |     | 35  |   | 15  | 04  |
| 25 | TAB  | TGF- $\beta$ activated | 7. | 7. | 7. | 6. | 6. | 7. | -1. | -0. | 1.7 | D | 0.0 | 0.6 |
| 73 | 3    | kinase 1/MAP3K7        | 89 | 01 | 13 | 20 | 26 | 05 | 789 | 839 | 89  | o | 36  | 63  |
| 97 |      | binding protein 3      | 62 | 09 | 07 | 63 | 04 | 13 | 934 | 906 | 93  | w | 21  | 32  |
|    |      |                        | 7  | 1  | 1  | 7  | 5  | 5  | 341 | 667 | 43  | n | 00  | 74  |
|    |      |                        |    |    |    |    |    |    |     |     | 41  |   | 87  | 04  |
| 22 | CPN  | Copine II              | 6. | 6. | 6. | 7. | 7. | 6. | 1.5 | 0.6 | 1.5 | U | 0.0 | 0.6 |
| 11 | E2   |                        | 17 | 64 | 58 | 30 | 28 | 63 | 234 | 073 | 23  | p | 41  | 63  |

|    |      |                       |    |    |    |    |    |    |     |     |     |   |     |     |
|----|------|-----------------------|----|----|----|----|----|----|-----|-----|-----|---|-----|-----|
| 84 |      |                       | 31 | 16 | 73 | 26 | 74 | 40 | 125 | 066 | 41  |   | 54  | 32  |
|    |      |                       | 5  | 6  | 3  |    | 2  | 4  | 3   | 67  | 25  |   | 18  | 74  |
|    |      |                       |    |    |    |    |    |    |     |     | 3   |   | 35  | 04  |
| 38 | ZNF  | Zinc finger protein   | 9. | 8. | 9. | 6. | 6. | 8. | -4. | -2. | 4.0 | D | 0.0 | 0.6 |
| 85 | 761  | 761                   | 21 | 12 | 51 | 01 | 63 | 21 | 000 | 000 | 00  | o | 12  | 63  |
| 61 |      |                       | 89 | 48 | 41 | 26 | 32 | 15 | 406 | 146 | 40  | w | 89  | 32  |
|    |      |                       | 3  | 6  | 8  | 8  | 6  | 9  | 667 | 667 | 66  | n | 52  | 74  |
|    |      |                       |    |    |    |    |    |    |     |     | 67  |   | 63  | 04  |
| 64 | SELP | Selectin P            | 5. | 5. | 6. | 6. | 7. | 6. | 2.0 | 1.0 | 2.0 | U | 0.0 | 0.6 |
| 03 |      |                       | 23 | 71 | 26 | 81 | 43 | 12 | 759 | 538 | 75  | p | 30  | 63  |
|    |      |                       | 41 | 42 | 09 | 03 | 93 | 10 | 955 | 033 | 99  |   | 511 | 32  |
|    |      |                       | 9  |    | 1  | 1  | 9  | 1  | 24  | 33  | 55  |   | 14  | 74  |
|    |      |                       |    |    |    |    |    |    |     |     | 24  |   | 7   | 04  |
| 83 | MAD  | MAD1 mitotic          | 6. | 6. | 7. | 6. | 6. | 6. | -1. | -0. | 1.6 | D | 0.0 | 0.6 |
| 79 | 1L1  | arrest deficient-like | 91 | 97 | 39 | 05 | 05 | 95 | 668 | 738 | 68  | o | 37  | 63  |
|    |      | 1 (yeast)             | 57 | 39 | 27 | 63 | 69 | 38 | 359 | 43  | 35  | w | 50  | 32  |
|    |      |                       | 3  | 8  | 5  | 1  | 7  | 9  | 274 |     | 92  | n | 54  | 74  |
|    |      |                       |    |    |    |    |    |    |     |     | 74  |   | 83  | 04  |
| 23 | ATP1 | Atpase, class V,      | 8. | 8. | 8. | 6. | 7. | 8. | -2. | -1. | 2.4 | D | 0.0 | 0.6 |
| 12 | 0B   | type 10B              | 89 | 84 | 07 | 22 | 39 | 27 | 471 | 305 | 71  | o | 37  | 63  |
| 0  |      |                       | 02 | 90 | 21 | 63 | 49 | 48 | 025 | 11  | 02  | w | 50  | 32  |
|    |      |                       | 7  | 6  | 4  | 3  | 3  | 8  | 673 |     | 56  | n | 64  | 74  |
|    |      |                       |    |    |    |    |    |    |     |     | 73  |   | 48  | 04  |
| 13 | RNF  | Ring finger protein   | 6. | 6. | 6. | 5. | 5. | 5. | -1. | -0. | 1.6 | D | 0.0 | 0.6 |
| 80 | 183  | 183                   | 35 | 03 | 12 | 87 | 08 | 47 | 613 | 689 | 13  | o | 20  | 63  |
| 65 |      |                       | 11 | 83 | 00 | 49 | 8  | 68 | 212 | 936 | 21  | w | 20  | 32  |
|    |      |                       | 7  | 6  | 3  | 1  |    | 4  | 698 | 667 | 26  | n | 82  | 74  |
|    |      |                       |    |    |    |    |    |    |     |     | 98  |   | 42  | 04  |
| 51 | RAB  | RAB6B, member         | 3. | 4. | 4. | 5. | 5. | 4. | 1.6 | 0.7 | 1.6 | U | 0.0 | 0.6 |

|    |      |                                                       |    |    |    |    |    |    |     |     |     |   |     |     |
|----|------|-------------------------------------------------------|----|----|----|----|----|----|-----|-----|-----|---|-----|-----|
| 56 | 6B   | RAS oncogene family                                   | 99 | 66 | 39 | 11 | 50 | 54 | 302 | 051 | 30  | p | 42  | 63  |
| 0  |      |                                                       | 17 | 60 | 37 | 66 | 75 | 26 | 614 | 033 | 26  |   | 87  | 32  |
|    |      |                                                       | 2  | 3  | 6  | 3  | 8  | 1  | 28  | 33  | 14  |   | 22  | 74  |
|    |      |                                                       |    |    |    |    |    |    |     |     | 28  |   | 38  | 04  |
| 55 | ATF7 | Activating transcription factor 7 interacting protein | 4. | 4. | 4. | 5. | 5. | 5. | 1.5 | 0.6 | 1.5 | U | 0.0 | 0.6 |
| 72 | IP   |                                                       | 70 | 69 | 48 | 29 | 30 | 26 | 798 | 597 | 79  | p | 02  | 63  |
| 9  |      |                                                       | 40 | 34 | 46 | 10 | 32 | 72 | 343 | 733 | 83  |   | 02  | 32  |
|    |      |                                                       | 7  | 8  | 7  | 2  | 6  | 6  | 91  | 33  | 43  |   | 19  | 74  |
|    |      |                                                       |    |    |    |    |    |    |     |     | 91  |   | 55  | 04  |
| 74 | WAR  | Tryptophanyl-trna synthetase                          | 3. | 2. | 3. | 4. | 4. | 4. | 1.7 | 0.8 | 1.7 | U | 0.0 | 0.6 |
| 53 | S    |                                                       | 71 | 96 | 80 | 21 | 47 | 22 | 552 | 117 | 55  | p | 10  | 63  |
|    |      |                                                       | 39 | 72 | 39 | 95 | 36 | 71 | 866 | 066 | 28  |   | 44  | 32  |
|    |      |                                                       | 6  | 7  | 3  | 3  | 1  | 4  | 68  | 67  | 66  |   | 96  | 74  |
|    |      |                                                       |    |    |    |    |    |    |     |     | 68  |   | 56  | 04  |
| 38 | SAM  | Sterile $\alpha$ motif domain containing 5            | 8. | 7. | 7. | 6. | 6. | 7. | -1. | -0. | 1.7 | D | 0.0 | 0.6 |
| 94 | D5   |                                                       | 22 | 95 | 27 | 82 | 69 | 50 | 748 | 806 | 48  | o | 38  | 63  |
| 32 |      |                                                       | 40 | 49 | 31 | 73 | 83 | 70 | 955 | 493 | 95  | w | 46  | 32  |
|    |      |                                                       | 9  | 7  | 2  | 8  | 1  | 1  | 198 | 333 | 51  | n | 32  | 74  |
|    |      |                                                       |    |    |    |    |    |    |     |     | 98  |   | 71  | 04  |
| 20 | ENG  | Endoglin                                              | 4. | 6. | 5. | 7. | 7. | 6. | 3.3 | 1.7 | 3.3 | U | 0.0 | 0.6 |
| 22 |      |                                                       | 49 | 11 | 65 | 33 | 61 | 52 | 310 | 359 | 31  | p | 07  | 63  |
|    |      |                                                       | 17 | 80 | 71 | 90 | 14 | 42 | 415 | 733 | 04  |   | 09  | 32  |
|    |      |                                                       | 2  | 2  | 4  | 8  | 7  | 5  | 12  | 33  | 15  |   | 79  | 74  |
|    |      |                                                       |    |    |    |    |    |    |     |     | 12  |   | 54  | 04  |
| 57 | NLG  | Neurologin 4,                                         | 3. | 3. | 3. | 5. | 6. | 4. | 3.3 | 1.7 | 3.3 | U | 0.0 | 0.6 |
| 50 | N4X  | X-linked                                              | 13 | 81 | 24 | 08 | 12 | 17 | 303 | 356 | 30  | p | 07  | 63  |
| 2  |      |                                                       | 03 | 19 | 53 | 95 | 56 | 94 | 104 | 566 | 31  |   | 47  | 32  |
|    |      |                                                       | 7  | 1  | 8  | 5  | 6  | 2  | 4   | 67  | 04  |   | 96  | 74  |
|    |      |                                                       |    |    |    |    |    |    |     |     | 4   |   | 39  | 04  |

|    |     |                      |    |    |    |    |    |    |     |     |     |   |     |     |
|----|-----|----------------------|----|----|----|----|----|----|-----|-----|-----|---|-----|-----|
| 10 | SOR | Sorbin and SH3       | 7. | 8. | 8. | 10 | 8. | 9. | 2.8 | 1.5 | 2.8 | U | 0.0 | 0.6 |
| 58 | BS1 | domain containing    | 27 | 76 | 14 | .7 | 58 | 37 | 730 | 225 | 73  | p | 39  | 63  |
| 0  |     | 1                    | 56 | 24 | 09 | 93 | 16 | 18 | 305 | 733 | 03  |   | 35  | 32  |
|    |     |                      | 6  | 7  | 8  | 34 | 6  | 3  | 49  | 33  | 05  |   | 19  | 74  |
|    |     |                      |    |    |    |    |    |    |     |     | 49  |   | 51  | 04  |
| 23 | PAL | Palladin,            | 6. | 8. | 7. | 10 | 8. | 8. | 2.8 | 1.4 | 2.8 | U | 0.0 | 0.6 |
| 02 | LD  | cytoskeletal         | 84 | 65 | 27 | .2 | 52 | 46 | 184 | 949 | 18  | p | 47  | 63  |
| 2  |     | associated protein   | 86 | 77 | 54 | 70 | 91 | 73 | 852 | 2   | 48  |   | 34  | 32  |
|    |     |                      | 4  | 6  | 1  | 04 | 9  | 4  | 16  |     | 52  |   | 37  | 74  |
|    |     |                      |    |    |    |    |    |    |     |     | 16  |   | 79  | 04  |
| 14 | CSR | Cysteine and         | 6. | 7. | 6. | 9. | 7. | 7. | 2.8 | 1.5 | 2.8 | U | 0.0 | 0.6 |
| 65 | P1  | glycine rich protein | 18 | 17 | 50 | 39 | 18 | 86 | 781 | 251 | 78  | p | 29  | 63  |
|    |     | 1                    | 92 | 74 | 44 | 44 | 45 | 75 | 397 | 366 | 13  |   | 06  | 32  |
|    |     |                      | 6  |    | 8  | 2  | 7  | 6  | 94  | 67  | 97  |   | 69  | 74  |
|    |     |                      |    |    |    |    |    |    |     |     | 94  |   | 77  | 04  |
| 84 | ZMY | Zinc finger,         | 6. | 7. | 6. | 5. | 6. | 6. | -1. | -0. | 1.6 | D | 0.0 | 0.6 |
| 22 | ND1 | MYND-type            | 79 | 21 | 52 | 89 | 24 | 19 | 664 | 735 | 64  | o | 13  | 63  |
| 5  | 5   | containing 15        | 40 | 96 | 41 | 41 | 50 | 24 | 832 | 376 | 83  | w | 00  | 32  |
|    |     |                      | 5  |    | 2  | 6  | 5  | 3  | 076 | 667 | 20  | n | 69  | 74  |
|    |     |                      |    |    |    |    |    |    |     |     | 76  |   | 36  | 04  |
| 37 | KCN | Potassium channel,   | 9. | 9. | 9. | 8. | 8. | 9. | -1. | -0. | 1.5 | D | 0.0 | 0.6 |
| 84 | Q1  | voltage gated        | 55 | 32 | 22 | 62 | 51 | 07 | 546 | 628 | 46  | o | 16  | 63  |
|    |     | KQT-like             | 64 | 72 | 06 | 50 | 61 | 72 | 135 | 666 | 13  | w | 68  | 32  |
|    |     | subfamily Q,         | 6  | 9  | 7  | 7  | 2  | 3  | 401 | 667 | 54  | n | 82  | 74  |
|    |     | member 1             |    |    |    |    |    |    |     |     | 01  |   | 79  | 04  |
| 23 | TME | Transmembrane        | 7. | 6. | 7. | 8. | 7. | 7. | 1.5 | 0.6 | 1.5 | U | 0.0 | 0.6 |
| 42 | D3  | p24 trafficking      | 35 | 85 | 81 | 25 | 92 | 87 | 973 | 756 | 97  | p | 38  | 63  |
| 3  |     | protein 3            | 68 | 42 | 61 | 64 | 00 | 77 | 568 | 866 | 35  |   | 94  | 32  |
|    |     |                      | 2  | 8  |    | 7  | 7  | 2  | 71  | 67  | 68  |   | 25  | 74  |

|    |      |                                |    |    |    |    |    |    |     |     |     |   |     |     |
|----|------|--------------------------------|----|----|----|----|----|----|-----|-----|-----|---|-----|-----|
|    |      |                                |    |    |    |    |    |    |     |     | 71  |   | 4   | 04  |
| 65 | WAS  | WAS protein                    | 8. | 8. | 7. | 7. | 7. | 7. | -1. | -0. | 1.5 | D | 0.0 | 0.6 |
| 36 | H7P  | family homolog 7               | 71 | 39 | 93 | 33 | 98 | 74 | 583 | 662 | 83  | o | 38  | 63  |
| 35 |      | pseudogene                     | 93 | 44 | 59 | 68 | 36 | 07 | 159 | 806 | 15  | w | 99  | 32  |
|    |      |                                | 2  | 1  | 2  | 8  | 5  |    | 561 | 667 | 95  | n | 95  | 74  |
|    |      |                                |    |    |    |    |    |    |     |     | 61  |   | 13  | 04  |
| 63 | ANO  | Anoctamin 3                    | 9. | 8. | 9. | 7. | 6. | 8. | -2. | -1. | 2.9 | D | 0.0 | 0.6 |
| 98 | 3    |                                | 40 | 41 | 02 | 08 | 46 | 59 | 972 | 571 | 72  | o | 23  | 63  |
| 2  |      |                                | 96 | 35 | 57 | 12 | 19 | 11 | 238 | 55  | 23  | w | 10  | 32  |
|    |      |                                | 1  | 5  | 3  | 3  | 1  |    | 735 |     | 87  | n | 33  | 74  |
|    |      |                                |    |    |    |    |    |    |     |     | 35  |   | 08  | 04  |
| 58 | PVR  | Poliovirus                     | 9. | 9. | 9. | 8. | 9. | 9. | -1. | -0. | 1.6 | D | 0.0 | 0.6 |
| 19 | L2   | receptor-related 2             | 94 | 49 | 34 | 30 | 03 | 23 | 668 | 738 | 68  | o | 36  | 63  |
|    |      | (herpesvirus entry mediator B) | 55 | 94 | 61 | 37 | 70 | 60 | 031 | 146 | 03  | w | 69  | 32  |
|    |      |                                | 7  | 6  | 8  | 1  | 1  | 5  | 654 | 667 | 16  | n | 94  | 74  |
|    |      |                                |    |    |    |    |    |    |     |     | 54  |   | 08  | 04  |
| 34 | IGF2 | Insulin like growth            | 6. | 6. | 7. | 8. | 8. | 7. | 2.3 | 1.2 | 2.3 | U | 0.0 | 0.6 |
| 81 |      | factor 2                       | 76 | 86 | 33 | 62 | 74 | 23 | 133 | 1   | 13  | p | 21  | 63  |
|    |      |                                | 55 | 78 | 06 | 01 | 29 | 09 | 763 |     | 37  |   | 90  | 32  |
|    |      |                                | 2  | 1  | 6  | 2  | 7  |    | 68  |     | 63  |   | 93  | 74  |
|    |      |                                |    |    |    |    |    |    |     |     | 68  |   | 35  | 04  |
| 10 | GPN  | Glycoprotein                   | 2. | 3. | 3. | 4. | 3. | 4. | 1.6 | 0.7 | 1.6 | U | 0.0 | 0.6 |
| 45 | MB   | (transmembrane)                | 80 | 07 | 66 | 21 | 37 | 17 | 723 | 418 | 72  | p | 41  | 63  |
| 7  |      | nmb                            | 27 | 72 | 44 | 38 | 62 | 99 | 150 | 466 | 31  |   | 54  | 32  |
|    |      |                                | 4  | 2  | 6  | 2  | 1  | 3  | 52  | 67  | 50  |   | 16  | 74  |
|    |      |                                |    |    |    |    |    |    |     |     | 52  |   | 28  | 04  |
| 94 | REC  | Recq helicase-like             | 7. | 7. | 7. | 6. | 6. | 6. | -1. | -0. | 1.5 | D | 0.0 | 0.6 |
| 00 | QL5  | 5                              | 36 | 73 | 17 | 58 | 94 | 78 | 569 | 650 | 69  | o | 15  | 63  |
|    |      |                                | 04 | 53 | 09 | 22 | 89 | 41 | 672 | 463 | 67  | w | 00  | 32  |

|    |      |                      |    |    |    |    |    |    |     |     |     |   |     |     |
|----|------|----------------------|----|----|----|----|----|----|-----|-----|-----|---|-----|-----|
|    |      |                      | 9  | 9  |    | 9  | 5  | 5  | 228 | 333 | 22  | n | 30  | 74  |
|    |      |                      |    |    |    |    |    |    |     |     | 28  |   | 11  | 04  |
| 25 | PAM  | Peptidase domain     | 4. | 5. | 5. | 7. | 6. | 6. | 2.6 | 1.4 | 2.6 | U | 0.0 | 0.6 |
| 89 | R1   | containing           | 91 | 69 | 53 | 69 | 43 | 29 | 780 | 211 | 78  | p | 09  | 63  |
| 1  |      | associated with      | 94 | 82 | 82 | 37 | 10 | 46 | 755 | 966 | 07  |   | 90  | 32  |
|    |      | muscle               |    | 2  | 8  | 6  | 7  | 6  | 62  | 67  | 55  |   | 79  | 74  |
|    |      | regeneration 1       |    |    |    |    |    |    |     |     | 62  |   | 41  | 04  |
| 12 | NIPA | Non imprinted in     | 8. | 7. | 7. | 6. | 7. | 7. | -1. | -0. | 1.7 | D | 0.0 | 0.6 |
| 36 | 1    | Prader-Willi/Angel   | 40 | 66 | 80 | 70 | 01 | 72 | 754 | 810 | 54  | o | 37  | 63  |
| 06 |      | man syndrome 1       | 92 | 08 | 62 | 92 | 45 | 06 | 017 | 663 | 01  | w | 35  | 32  |
|    |      |                      | 7  | 5  | 9  | 7  | 4  | 1  | 733 | 333 | 77  | n | 47  | 74  |
|    |      |                      |    |    |    |    |    |    |     |     | 33  |   | 5   | 04  |
| 27 | AMY  | Amylase, $\alpha$ 1A | 8. | 8. | 8. | 7. | 7. | 8. | -1. | -0. | 1.6 | D | 0.0 | 0.6 |
| 6  | 1A   | (salivary)           | 63 | 58 | 49 | 49 | 82 | 12 | 695 | 761 | 95  | o | 06  | 63  |
|    |      |                      | 92 | 12 | 99 | 12 | 35 | 14 | 126 | 393 | 12  | w | 00  | 32  |
|    |      |                      | 8  | 6  | 3  | 9  | 6  | 4  | 963 | 333 | 69  | n | 48  | 74  |
|    |      |                      |    |    |    |    |    |    |     |     | 63  |   | 73  | 04  |
| 96 | KDM  | Lysine (K)-specific  | 7. | 7. | 7. | 6. | 6. | 6. | -1. | -0. | 1.6 | D | 0.0 | 0.6 |
| 82 | 4A   | demethylase 4A       | 04 | 71 | 10 | 03 | 67 | 91 | 679 | 747 | 79  | o | 36  | 63  |
|    |      |                      | 86 | 85 | 26 | 90 | 60 | 08 | 412 | 956 | 41  | w | 61  | 32  |
|    |      |                      | 7  | 9  | 2  | 4  | 8  | 9  | 542 | 667 | 25  | n | 49  | 74  |
|    |      |                      |    |    |    |    |    |    |     |     | 42  |   | 6   | 04  |
| 47 | NFIL | Nuclear factor,      | 3. | 4. | 4. | 5. | 6. | 5. | 2.8 | 1.5 | 2.8 | U | 0.0 | 0.6 |
| 83 | 3    | interleukin 3        | 95 | 88 | 07 | 97 | 28 | 14 | 319 | 017 | 31  | p | 04  | 63  |
|    |      | regulated            | 39 | 38 | 11 | 60 | 84 | 98 | 517 | 966 | 95  |   | 29  | 32  |
|    |      |                      | 1  | 6  | 4  | 5  | 1  | 4  | 13  | 67  | 17  |   | 44  | 74  |
|    |      |                      |    |    |    |    |    |    |     |     | 13  |   | 16  | 04  |
| 55 | PPP3 | Protein              | 6. | 6. | 6. | 7. | 7. | 6. | 1.5 | 0.6 | 1.5 | U | 0.0 | 0.6 |
| 30 | CA   | phosphatase 3,       | 34 | 29 | 76 | 33 | 34 | 75 | 960 | 744 | 96  | p | 22  | 63  |

|    |      |                                        |         |         |         |         |         |         |           |           |                |   |               |                |
|----|------|----------------------------------------|---------|---------|---------|---------|---------|---------|-----------|-----------|----------------|---|---------------|----------------|
|    |      | catalytic subunit, $\alpha$<br>isozyme | 68<br>4 | 00<br>5 | 90<br>6 | 09<br>7 | 46<br>2 | 37<br>5 | 029<br>67 | 633<br>33 | 00<br>29<br>67 |   | 81<br>24<br>3 | 32<br>74<br>04 |
| 23 | EPB4 | Erythrocyte                            | 2.      | 2.      | 3.      | 3.      | 3.      | 3.      | 1.5       | 0.6       | 1.5            | U | 0.0           | 0.6            |
| 13 | 1L3  | membrane protein                       | 94      | 74      | 32      | 69      | 46      | 77      | 605       | 420       | 60             | p | 07            | 63             |
| 6  |      | band 4.1-like 3                        | 48      | 55      | 82      | 85      | 67      | 93      | 089       | 166       | 50             |   | 51            | 32             |
|    |      |                                        | 4       | 4       | 7       | 7       | 9       | 4       | 88        | 67        | 89             |   | 57            | 74             |
|    |      |                                        |         |         |         |         |         |         |           |           | 88             |   | 33            | 04             |
| 79 | MCT  | Multiple C2                            | 3.      | 5.      | 3.      | 6.      | 6.      | 4.      | 3.6       | 1.8       | 3.6            | U | 0.0           | 0.6            |
| 77 | P1   | domains,                               | 00      | 07      | 05      | 15      | 06      | 55      | 778       | 788       | 77             | p | 24            | 63             |
| 2  |      | transmembrane 1                        | 46      | 78      | 22      | 63      | 22      | 29      | 517       | 633       | 85             |   | 67            | 32             |
|    |      |                                        | 7       | 8       | 9       |         | 1       | 2       | 65        | 33        | 17             |   | 42            | 74             |
|    |      |                                        |         |         |         |         |         |         |           |           | 65             |   | 86            | 04             |
| 28 | IGK  | Immunoglobulin $\kappa$                | 4.      | 3.      | 4.      | 5.      | 8.      | 8.      | 9.2       | 3.2       | 9.2            | U | 0.0           | 0.6            |
| 89 | V1D- | variable 1D-33                         | 13      | 77      | 06      | 43      | 05      | 11      | 351       | 071       | 35             | p | 02            | 63             |
| 6  | 33   |                                        | 79      | 90      | 70      | 04      | 72      | 77      | 154       | 3         | 11             |   | 29            | 32             |
|    |      |                                        | 3       | 5       | 6       | 3       | 3       | 7       | 71        |           | 54             |   | 32            | 74             |
|    |      |                                        |         |         |         |         |         |         |           |           | 71             |   | 51            | 04             |
| 57 | AS3  | Arsenite                               | 7.      | 7.      | 8.      | 5.      | 4.      | 8.      | -3.       | -1.       | 3.8            | D | 0.0           | 0.6            |
| 41 | MT   | methyltransferase                      | 93      | 81      | 68      | 47      | 96      | 19      | 818       | 933       | 18             | o | 45            | 63             |
| 2  |      |                                        | 68      | 55      | 91      | 93      | 83      | 47      | 536       | 02        | 53             | w | 45            | 32             |
|    |      |                                        | 7       | 2       | 7       | 5       | 7       | 8       | 992       |           | 69             | n | 65            | 74             |
|    |      |                                        |         |         |         |         |         |         |           |           | 92             |   | 54            | 04             |
| 19 | CEL  | Cadherin, EGF                          | 7.      | 6.      | 6.      | 6.      | 6.      | 6.      | -1.       | -0.       | 1.6            | D | 0.0           | 0.6            |
| 52 | SR2  | LAG seven-pass                         | 54      | 67      | 58      | 17      | 29      | 14      | 657       | 728       | 57             | o | 31            | 63             |
|    |      | G-type receptor 2                      | 07      | 52      | 31      | 41      | 39      | 43      | 413       | 933       | 41             | w | 17            | 32             |
|    |      |                                        | 6       | 7       | 8       | 2       | 7       | 2       | 218       | 333       | 32             | n | 21            | 74             |
|    |      |                                        |         |         |         |         |         |         |           |           | 18             |   | 41            | 04             |
| 10 | ZAS  | ZO-2 associated                        | 6.      | 6.      | 6.      | 5.      | 5.      | 6.      | -1.       | -0.       | 1.6            | D | 0.0           | 0.6            |

|    |      |                     |    |    |    |    |    |    |     |     |     |   |     |     |
|----|------|---------------------|----|----|----|----|----|----|-----|-----|-----|---|-----|-----|
| 19 | P    | speckle protein     | 62 | 38 | 17 | 29 | 59 | 02 | 695 | 761 | 95  | o | 13  | 63  |
| 27 |      |                     | 65 | 32 | 94 | 29 | 14 | 04 | 166 | 426 | 16  | w | 53  | 32  |
| 65 |      |                     | 1  | 1  | 6  | 8  | 8  | 4  | 129 | 667 | 61  | n | 85  | 74  |
| 5  |      |                     |    |    |    |    |    |    |     |     | 29  |   | 69  | 04  |
| 97 | PIEZ | Piezo-type          | 7. | 8. | 7. | 9. | 8. | 7. | 1.9 | 0.9 | 1.9 | U | 0.0 | 0.6 |
| 80 | O1   | mechanosensitive    | 38 | 08 | 52 | 15 | 82 | 80 | 063 | 308 | 06  | p | 41  | 63  |
|    |      | ion channel         | 35 | 55 | 47 | 53 | 91 | 18 | 724 | 3   | 37  |   | 52  | 32  |
|    |      | component 1         | 6  | 4  | 3  | 5  |    | 7  | 4   |     | 24  |   | 77  | 74  |
|    |      |                     |    |    |    |    |    |    |     |     | 4   |   | 23  | 04  |
| 53 | PMA  | Phorbol-12-myrista  | 3. | 3. | 2. | 3. | 4. | 3. | 1.8 | 0.9 | 1.8 | U | 0.0 | 0.6 |
| 66 | IP1  | te-13-acetate-induc | 32 | 07 | 56 | 50 | 41 | 76 | 753 | 071 | 75  | p | 14  | 63  |
|    |      | ed protein 1        | 10 | 72 | 71 | 14 | 79 | 75 | 328 | 466 | 33  |   | 51  | 32  |
|    |      |                     | 9  | 2  | 2  | 5  |    | 2  | 33  | 67  | 28  |   | 40  | 74  |
|    |      |                     |    |    |    |    |    |    |     |     | 33  |   | 91  | 04  |
| 32 | HP   | Haptoglobin         | 3. | 3. | 3. | 4. | 4. | 3. | 1.9 | 0.9 | 1.9 | U | 0.0 | 0.6 |
| 40 |      |                     | 30 | 69 | 58 | 57 | 91 | 98 | 504 | 638 | 50  | p | 06  | 63  |
|    |      |                     | 14 | 55 | 69 | 50 | 79 | 24 | 675 | 2   | 46  |   | 05  | 32  |
|    |      |                     | 8  | 1  | 6  | 3  |    | 8  | 55  |     | 75  |   | 53  | 74  |
|    |      |                     |    |    |    |    |    |    |     |     | 55  |   | 13  | 04  |
| 27 | GLI2 | GLI family zinc     | 2. | 3. | 2. | 6. | 3. | 4. | 2.7 | 1.4 | 2.7 | U | 0.0 | 0.6 |
| 36 |      | finger 2            | 69 | 91 | 90 | 01 | 73 | 13 | 441 | 563 | 44  | p | 48  | 63  |
|    |      |                     | 82 | 79 | 58 | 88 | 32 | 90 | 449 | 566 | 14  |   | 84  | 32  |
|    |      |                     | 7  | 8  |    | 8  | 2  | 2  | 08  | 67  | 49  |   | 26  | 74  |
|    |      |                     |    |    |    |    |    |    |     |     | 08  |   | 83  | 04  |
| 12 | MIE  | Mitochondrial       | 6. | 6. | 6. | 6. | 5. | 5. | -1. | -0. | 1.5 | D | 0.0 | 0.6 |
| 51 | F2   | elongation factor 2 | 83 | 55 | 36 | 00 | 82 | 95 | 580 | 660 | 80  | o | 07  | 63  |
| 70 |      |                     | 72 | 33 | 41 | 10 | 05 | 24 | 360 | 253 | 36  | w | 55  | 32  |
|    |      |                     | 6  | 4  | 8  | 5  | 7  |    | 106 | 333 | 01  | n | 69  | 74  |
|    |      |                     |    |    |    |    |    |    |     |     | 06  |   | 64  | 04  |



|                |              |                                                             |                     |                     |                     |                      |                     |                     |                          |                              |                             |                  |                             |                             |
|----------------|--------------|-------------------------------------------------------------|---------------------|---------------------|---------------------|----------------------|---------------------|---------------------|--------------------------|------------------------------|-----------------------------|------------------|-----------------------------|-----------------------------|
| 12<br>81       | COL<br>3A1   | Collagen, type III,<br>$\alpha$ 1                           | 6.<br>02<br>62<br>6 | 8.<br>61<br>68<br>3 | 8.<br>06<br>12<br>9 | 11<br>.9<br>23<br>81 | 9.<br>09<br>15<br>7 | 9.<br>21<br>88<br>9 | 5.6<br>960<br>560<br>13  | 2.5<br>099<br>633<br>33      | 5.6<br>96<br>05<br>60<br>13 | U<br>p           | 0.0<br>30<br>19<br>13<br>82 | 0.6<br>63<br>32<br>74<br>04 |
| 11<br>36<br>12 | CYP<br>2U1   | Cytochrome P450,<br>family 2, subfamily<br>U, polypeptide 1 | 3.<br>74<br>87      | 4.<br>06<br>11<br>4 | 4.<br>14<br>07<br>4 | 5.<br>57<br>39       | 4.<br>70<br>04<br>1 | 4.<br>44<br>23<br>2 | 1.8<br>947<br>620<br>3   | 0.9<br>220<br>166<br>67<br>3 | 1.8<br>94<br>76<br>20<br>3  | U<br>p           | 0.0<br>17<br>35<br>18<br>62 | 0.6<br>63<br>32<br>74<br>04 |
| 10<br>15<br>7  | AAS<br>S     | Amino adipate-semi<br>aldehyde synthase                     | 8.<br>81<br>97<br>5 | 8.<br>90<br>23<br>3 | 8.<br>03<br>05<br>1 | 7.<br>23<br>90<br>9  | 7.<br>02<br>60<br>1 | 8.<br>03<br>51      | -2.<br>220<br>364<br>707 | -1.<br>150<br>796<br>667     | 2.2<br>20<br>36<br>47<br>07 | D<br>o<br>w<br>n | 0.0<br>11<br>87<br>43<br>88 | 0.6<br>63<br>32<br>74<br>04 |
| 11<br>06<br>7  | C10o<br>rf10 | Chromosome 10<br>open reading frame<br>10                   | 6.<br>13<br>05<br>1 | 5.<br>79<br>76<br>5 | 6.<br>43<br>74<br>2 | 8.<br>24<br>82<br>4  | 7.<br>23<br>07<br>7 | 6.<br>73<br>89<br>9 | 2.4<br>353<br>683<br>55  | 1.2<br>841<br>4              | 2.4<br>35<br>36<br>83<br>55 | U<br>p           | 0.0<br>13<br>08<br>72<br>92 | 0.6<br>63<br>32<br>74<br>04 |
| 80<br>31<br>0  | PDG<br>FD    | Platelet derived<br>growth factor D                         | 5.<br>41<br>29<br>1 | 5.<br>20<br>46<br>5 | 6.<br>41<br>75<br>4 | 6.<br>98<br>22<br>5  | 6.<br>60<br>2<br>5  | 6.<br>29<br>76<br>9 | 1.9<br>304<br>626<br>83  | 0.9<br>489<br>466<br>67      | 1.9<br>30<br>46<br>26<br>83 | U<br>p           | 0.0<br>29<br>63<br>92<br>28 | 0.6<br>63<br>32<br>74<br>04 |
| 10<br>65<br>9  | CEL<br>F2    | CUGBP, Elav-like<br>family member 2                         | 5.<br>92<br>84<br>4 | 6.<br>45<br>56<br>1 | 6.<br>03<br>10<br>5 | 7.<br>04<br>46<br>7  | 6.<br>85<br>66<br>7 | 6.<br>40<br>81<br>7 | 1.5<br>491<br>426<br>52  | 0.6<br>314<br>7              | 1.5<br>49<br>14<br>26       | U<br>p           | 0.0<br>30<br>39<br>50       | 0.6<br>63<br>32<br>74       |

|    |     |                      |    |    |    |    |    |    |     |     |     |   |     |     |
|----|-----|----------------------|----|----|----|----|----|----|-----|-----|-----|---|-----|-----|
|    |     |                      |    |    |    |    |    |    |     |     | 52  |   | 07  | 04  |
| 26 | PLE | Pleckstrin           | 7. | 7. | 7. | 6. | 7. | 7. | -1. | -0. | 1.5 | D | 0.0 | 0.6 |
| 03 | KHG | homology and         | 91 | 56 | 50 | 73 | 15 | 31 | 508 | 593 | 08  | o | 26  | 63  |
| 0  | 3   | rhogef domain        | 51 | 72 | 71 | 75 | 95 | 19 | 909 | 506 | 90  | w | 70  | 32  |
|    |     | containing G3        | 8  | 1  | 6  | 5  | 8  |    | 905 | 667 | 99  | n | 41  | 74  |
|    |     |                      |    |    |    |    |    |    |     |     | 05  |   | 25  | 04  |
| 57 | CAR | Carnosine synthase   | 8. | 8. | 8. | 5. | 7. | 7. | -2. | -1. | 2.2 | D | 0.0 | 0.6 |
| 57 | NS1 | 1                    | 26 | 10 | 39 | 97 | 55 | 67 | 277 | 187 | 77  | o | 30  | 63  |
| 1  |     |                      | 46 | 88 | 83 | 90 | 54 | 46 | 629 | 533 | 62  | w | 51  | 32  |
|    |     |                      | 6  |    |    | 5  | 4  | 7  | 893 | 333 | 98  | n | 50  | 74  |
|    |     |                      |    |    |    |    |    |    |     |     | 93  |   | 21  | 04  |
| 57 | NYN | NYN domain and       | 6. | 6. | 6. | 5. | 5. | 5. | -1. | -0. | 1.5 | D | 0.0 | 0.6 |
| 52 | RIN | retroviral integrase | 32 | 34 | 23 | 67 | 96 | 28 | 581 | 661 | 81  | o | 14  | 63  |
| 3  |     | containing           | 07 | 74 | 78 | 19 | 42 | 48 | 894 | 653 | 89  | w | 24  | 32  |
|    |     |                      | 7  | 1  | 2  | 9  | 1  | 4  | 442 | 333 | 44  | n | 92  | 74  |
|    |     |                      |    |    |    |    |    |    |     |     | 42  |   | 19  | 04  |
| 25 | PNK | Paroxysmal           | 8. | 8. | 8. | 7. | 7. | 7. | -1. | -0. | 1.7 | D | 0.0 | 0.6 |
| 95 | D   | nonkinesigenic       | 61 | 16 | 29 | 52 | 49 | 67 | 734 | 794 | 34  | o | 02  | 63  |
| 3  |     | dyskinesia           | 18 | 58 | 68 | 19 | 71 | 15 | 616 | 616 | 61  | w | 60  | 32  |
|    |     |                      | 3  | 4  | 3  | 9  |    | 6  | 414 | 667 | 64  | n | 90  | 74  |
|    |     |                      |    |    |    |    |    |    |     |     | 14  |   | 87  | 04  |
| 10 | RAM | Receptor (G          | 6. | 6. | 6. | 8. | 8. | 6. | 2.6 | 1.4 | 2.6 | U | 0.0 | 0.6 |
| 26 | P3  | protein-coupled)     | 23 | 83 | 22 | 29 | 31 | 90 | 572 | 099 | 57  | p | 10  | 63  |
| 8  |     | activity modifying   | 22 | 16 | 16 | 45 | 77 | 29 | 058 | 1   | 20  |   | 68  | 32  |
|    |     | protein 3            | 2  | 7  | 4  | 3  | 5  | 8  | 58  |     | 58  |   | 37  | 74  |
|    |     |                      |    |    |    |    |    |    |     |     | 58  |   | 07  | 04  |
| 55 | PAG | Phosphoprotein       | 7. | 7. | 7. | 6. | 6. | 6. | -1. | -0. | 1.6 | D | 0.0 | 0.6 |
| 82 | 1   | membrane anchor      | 62 | 08 | 33 | 59 | 37 | 96 | 626 | 701 | 26  | o | 16  | 63  |
| 4  |     | with                 | 64 | 32 | 00 | 70 | 25 | 59 | 085 | 403 | 08  | w | 67  | 32  |

|    |      |                                                              |    |    |    |    |    |    |     |     |     |   |     |     |
|----|------|--------------------------------------------------------------|----|----|----|----|----|----|-----|-----|-----|---|-----|-----|
|    |      | glycosphingolipid<br>microdomains 1                          | 3  | 7  | 4  | 3  | 1  | 9  | 744 | 333 | 57  | n | 53  | 74  |
|    |      |                                                              |    |    |    |    |    |    |     |     | 44  |   | 88  | 04  |
| 23 | LY96 | Lymphocyte<br>antigen 96                                     | 4. | 6. | 5. | 7. | 7. | 6. | 2.5 | 1.3 | 2.5 | U | 0.0 | 0.6 |
| 64 |      |                                                              | 79 | 16 | 98 | 64 | 08 | 21 | 221 | 346 | 22  | p | 25  | 63  |
| 3  |      |                                                              | 94 | 70 | 18 | 54 | 90 | 77 | 603 | 6   | 16  |   | 36  | 32  |
|    |      |                                                              |    | 3  | 8  | 1  | 9  | 9  | 5   |     | 03  |   | 01  | 74  |
|    |      |                                                              |    |    |    |    |    |    |     |     | 5   |   | 79  | 04  |
| 14 | TME  | Transmembrane<br>protein 99                                  | 8. | 8. | 8. | 7. | 7. | 7. | -1. | -0. | 1.7 | D | 0.0 | 0.6 |
| 71 | M99  |                                                              | 40 | 00 | 10 | 27 | 54 | 36 | 714 | 778 | 14  | o | 03  | 63  |
| 84 |      |                                                              | 92 | 34 | 80 | 52 | 22 | 87 | 946 | 163 | 94  | w | 01  | 32  |
|    |      |                                                              | 5  | 6  | 4  | 4  | 3  | 9  | 218 | 333 | 62  | n | 07  | 74  |
|    |      |                                                              |    |    |    |    |    |    |     |     | 18  |   | 3   | 04  |
| 63 | SCN  | Sodium channel,<br>voltage gated, type<br>IV $\beta$ subunit | 3. | 4. | 4. | 5. | 5. | 4. | 1.9 | 0.9 | 1.9 | U | 0.0 | 0.6 |
| 30 | 4B   |                                                              | 38 | 53 | 22 | 35 | 35 | 30 | 423 | 578 | 42  | p | 42  | 63  |
|    |      |                                                              | 04 | 10 | 30 | 07 | 07 | 65 | 591 | 1   | 35  |   | 86  | 32  |
|    |      |                                                              | 6  | 3  | 3  |    |    | 5  | 69  |     | 91  |   | 88  | 74  |
|    |      |                                                              |    |    |    |    |    |    |     |     | 69  |   | 07  | 04  |
| 30 | HAB  | Hyaluronan<br>binding protein 2                              | 10 | 10 | 10 | 8. | 9. | 10 | -1. | -0. | 1.7 | D | 0.0 | 0.6 |
| 26 | P2   |                                                              | .3 | .3 | .3 | 84 | 65 | .1 | 749 | 806 | 49  | o | 39  | 63  |
|    |      |                                                              | 98 | 73 | 05 | 19 | 06 | 64 | 339 | 81  | 33  | w | 63  | 32  |
|    |      |                                                              | 33 | 76 | 74 | 8  | 4  | 78 | 13  |     | 91  | n | 71  | 74  |
|    |      |                                                              |    |    |    |    |    |    |     |     | 3   |   | 72  | 04  |
| 15 | CYP  | Cytochrome P450,<br>family 2, subfamily<br>C, polypeptide 9  | 9. | 9. | 9. | 7. | 8. | 9. | -2. | -1. | 2.1 | D | 0.0 | 0.6 |
| 59 | 2C9  |                                                              | 69 | 83 | 92 | 89 | 61 | 71 | 110 | 077 | 10  | o | 39  | 63  |
|    |      |                                                              | 72 | 05 | 98 | 21 | 33 | 90 | 668 | 7   | 66  | w | 18  | 32  |
|    |      |                                                              | 4  | 7  | 3  | 1  | 8  | 5  | 488 |     | 84  | n | 04  | 74  |
|    |      |                                                              |    |    |    |    |    |    |     |     | 88  |   | 36  | 04  |
| 10 | LOC  | Uncharacterized                                              | 7. | 7. | 7. | 6. | 6. | 6. | -1. | -0. | 1.5 | D | 0.0 | 0.6 |
| 53 | 1053 | LOC105379278                                                 | 49 | 64 | 07 | 85 | 68 | 88 | 511 | 595 | 11  | o | 18  | 63  |

|    |      |                       |    |    |    |    |    |    |     |     |     |   |     |     |
|----|------|-----------------------|----|----|----|----|----|----|-----|-----|-----|---|-----|-----|
| 79 | 7927 |                       | 63 | 48 | 38 | 24 | 84 | 76 | 010 | 513 | 01  | w | 43  | 32  |
| 27 | 8    |                       | 6  | 5  | 5  | 1  | 4  | 7  | 131 | 333 | 01  | n | 06  | 74  |
| 8  |      |                       |    |    |    |    |    |    |     |     | 31  |   | 8   | 04  |
| 10 | CAL  | Calcitonin receptor   | 4. | 4. | 4. | 6. | 6. | 4. | 2.5 | 1.3 | 2.5 | U | 0.0 | 0.6 |
| 20 | CRL  | like receptor         | 13 | 73 | 61 | 16 | 70 | 65 | 383 | 438 | 38  | p | 31  | 63  |
| 3  |      |                       | 45 | 97 | 21 | 26 | 34 | 19 | 540 | 933 | 35  |   | 45  | 32  |
|    |      |                       | 5  | 2  | 1  | 6  | 3  | 7  | 9   | 33  | 40  |   | 73  | 74  |
|    |      |                       |    |    |    |    |    |    |     |     | 9   |   | 37  | 04  |
| 84 | ZNF  | Zinc finger protein   | 5. | 4. | 4. | 3. | 4. | 4. | -1. | -0. | 1.5 | D | 0.0 | 0.6 |
| 43 | 528  | 528                   | 10 | 87 | 88 | 86 | 38 | 83 | 509 | 593 | 09  | o | 49  | 63  |
| 6  |      |                       | 98 | 83 | 09 | 52 | 57 | 67 | 181 | 766 | 18  | w | 85  | 32  |
|    |      |                       |    | 8  | 1  | 7  | 7  | 5  | 862 | 667 | 18  | n | 99  | 74  |
|    |      |                       |    |    |    |    |    |    |     |     | 62  |   | 47  | 04  |
| 14 | CRY  | Crystallin $\alpha$ B | 7. | 8. | 7. | 9. | 9. | 8. | 2.3 | 1.2 | 2.3 | U | 0.0 | 0.6 |
| 10 | AB   |                       | 28 | 39 | 56 | 54 | 39 | 03 | 639 | 412 | 63  | p | 31  | 63  |
|    |      |                       | 86 | 46 | 15 | 03 | 68 | 12 | 617 | 066 | 96  |   | 21  | 32  |
|    |      |                       | 9  | 2  | 9  | 8  | 5  | 9  | 08  | 67  | 17  |   | 05  | 74  |
|    |      |                       |    |    |    |    |    |    |     |     | 08  |   | 61  | 04  |
| 10 | LY75 | LY75-CD302            | 6. | 7. | 7. | 8. | 8. | 8. | 1.9 | 0.9 | 1.9 | U | 0.0 | 0.6 |
| 05 | -CD3 | readthrough           | 91 | 27 | 69 | 36 | 28 | 08 | 317 | 498 | 31  | p | 04  | 63  |
| 26 | 02   |                       | 19 | 82 | 17 | 37 | 02 | 75 | 030 | 733 | 70  |   | 11  | 32  |
| 66 |      |                       | 2  | 9  |    | 2  | 3  | 8  | 49  | 33  | 30  |   | 47  | 74  |
| 4  |      |                       |    |    |    |    |    |    |     |     | 49  |   | 26  | 04  |
| 84 | CAS  | Calsequestrin 2       | 4. | 4. | 3. | 5. | 4. | 5. | 1.9 | 0.9 | 1.9 | U | 0.0 | 0.6 |
| 5  | Q2   |                       | 12 | 57 | 82 | 37 | 93 | 16 | 758 | 825 | 75  | p | 03  | 63  |
|    |      |                       | 57 | 64 | 97 | 63 | 42 | 89 | 955 | 066 | 89  |   | 32  | 32  |
|    |      |                       | 7  | 9  | 2  | 2  | 7  | 1  | 25  | 67  | 55  |   | 69  | 74  |
|    |      |                       |    |    |    |    |    |    |     |     | 25  |   | 7   | 04  |
| 27 | AMY  | Amylase, $\alpha$ 1C  | 8. | 8. | 8. | 7. | 7. | 8. | -1. | -0. | 1.6 | D | 0.0 | 0.6 |

|               |             |                                                    |                     |                     |                     |                     |                     |                     |                          |                         |                             |                  |                             |                             |
|---------------|-------------|----------------------------------------------------|---------------------|---------------------|---------------------|---------------------|---------------------|---------------------|--------------------------|-------------------------|-----------------------------|------------------|-----------------------------|-----------------------------|
| 8             | 1C          | (salivary)                                         | 63<br>92<br>8       | 58<br>12<br>6       | 49<br>99<br>3       | 49<br>12<br>9       | 82<br>35<br>6       | 12<br>14<br>4       | 695<br>126<br>963        | 761<br>393<br>333       | 95<br>12<br>69<br>63        | o<br>w<br>n      | 06<br>00<br>48<br>73        | 63<br>32<br>74<br>04        |
| 19<br>60      | EGR<br>3    | Early growth<br>response 3                         | 5.<br>67<br>63<br>3 | 5.<br>37<br>65<br>6 | 5.<br>26<br>57<br>8 | 6.<br>62<br>62      | 9.<br>45<br>73<br>2 | 7.<br>51<br>62<br>9 | 5.3<br>779<br>139<br>32  | 2.4<br>270<br>466<br>67 | 5.3<br>77<br>91<br>39<br>32 | U<br>p           | 0.0<br>07<br>46<br>36<br>26 | 0.6<br>63<br>32<br>74<br>04 |
| 28<br>69      | GRK<br>5    | G protein-coupled<br>receptor kinase 5             | 5.<br>04<br>83<br>1 | 5.<br>76<br>66<br>8 | 6.<br>03<br>06      | 7.<br>46<br>46<br>1 | 6.<br>79<br>45<br>8 | 6.<br>13<br>57<br>8 | 2.2<br>706<br>415<br>88  | 1.1<br>831              | 2.2<br>70<br>64<br>15<br>88 | U<br>p           | 0.0<br>19<br>03<br>73<br>99 | 0.6<br>63<br>32<br>74<br>04 |
| 59<br>99      | RGS<br>4    | Regulator of<br>G-protein signaling<br>4           | 3.<br>70<br>42      | 4.<br>88<br>48<br>5 | 4.<br>37<br>24<br>7 | 7.<br>29<br>12<br>9 | 5.<br>04<br>49<br>4 | 5.<br>19<br>24<br>6 | 2.8<br>726<br>654<br>76  | 1.5<br>223<br>9         | 2.8<br>72<br>66<br>54<br>76 | U<br>p           | 0.0<br>43<br>51<br>52<br>64 | 0.6<br>63<br>32<br>74<br>04 |
| 25<br>85<br>4 | FAM<br>149A | Family with<br>sequence similarity<br>149 member A | 9.<br>32<br>81<br>2 | 8.<br>70<br>64<br>9 | 8.<br>83<br>56<br>8 | 8.<br>06<br>44<br>3 | 8.<br>34<br>10<br>2 | 8.<br>44<br>05<br>3 | -1.<br>596<br>342<br>257 | -0.<br>674<br>77        | 1.5<br>96<br>34<br>22<br>57 | D<br>o<br>w<br>n | 0.0<br>16<br>21<br>82<br>39 | 0.6<br>63<br>32<br>74<br>04 |
| 64<br>94<br>3 | NT5<br>DC2  | 5'-nucleotidase<br>domain containing<br>2          | 3.<br>99<br>87<br>3 | 5.<br>18<br>84<br>3 | 4.<br>14<br>00<br>7 | 7.<br>44<br>06<br>3 | 6.<br>34<br>25      | 4.<br>84<br>54<br>6 | 3.4<br>037<br>380<br>21  | 1.7<br>671<br>2         | 3.4<br>03<br>73<br>80<br>21 | U<br>p           | 0.0<br>29<br>50<br>66<br>12 | 0.6<br>63<br>32<br>74<br>04 |

|    |     |                          |    |    |    |    |    |    |     |     |     |   |     |     |
|----|-----|--------------------------|----|----|----|----|----|----|-----|-----|-----|---|-----|-----|
| 27 | GNA | GNAS complex             | 9. | 9. | 10 | 10 | 10 | 10 | 1.5 | 0.5 | 1.5 | U | 0.0 | 0.6 |
| 78 | S   | locus                    | 85 | 65 | .5 | .5 | .6 | .6 | 090 | 935 | 09  | p | 44  | 63  |
|    |     |                          | 24 | 99 | 55 | 99 | 29 | 19 | 040 | 966 | 00  |   | 92  | 32  |
|    |     |                          | 7  |    | 42 | 71 | 14 | 73 | 38  | 67  | 40  |   | 60  | 74  |
|    |     |                          |    |    |    |    |    |    |     |     | 38  |   | 44  | 04  |
| 41 | MC  | Minichromosome           | 3. | 3. | 4. | 4. | 5. | 4. | 1.7 | 0.8 | 1.7 | U | 0.0 | 0.6 |
| 71 | M2  | maintenance              | 70 | 67 | 05 | 28 | 24 | 33 | 545 | 110 | 54  | p | 21  | 63  |
|    |     | complex                  | 06 | 51 | 52 | 64 | 02 | 75 | 203 | 766 | 52  |   | 43  | 32  |
|    |     | component 2              | 3  | 8  | 3  | 3  | 6  | 8  | 32  | 67  | 03  |   | 61  | 74  |
|    |     |                          |    |    |    |    |    |    |     |     | 32  |   | 92  | 04  |
| 39 | LAM | Laminin subunit $\alpha$ | 4. | 6. | 5. | 8. | 6. | 6. | 2.7 | 1.4 | 2.7 | U | 0.0 | 0.6 |
| 10 | A4  | 4                        | 83 | 61 | 87 | 03 | 75 | 84 | 005 | 332 | 00  | p | 27  | 63  |
|    |     |                          | 49 | 67 | 92 | 31 | 35 | 39 | 314 | 433 | 53  |   | 84  | 32  |
|    |     |                          | 5  | 4  | 3  |    | 9  | 6  | 19  | 33  | 14  |   | 49  | 74  |
|    |     |                          |    |    |    |    |    |    |     |     | 19  |   | 22  | 04  |
| 81 | FAH | Fumarylacetoacetat       | 9. | 9. | 9. | 8. | 8. | 9. | -1. | -0. | 1.9 | D | 0.0 | 0.6 |
| 88 | D1  | e hydrolase domain       | 96 | 40 | 93 | 58 | 62 | 25 | 928 | 947 | 28  | o | 07  | 63  |
| 9  |     | containing 1             | 63 | 90 | 21 | 33 | 37 | 86 | 220 | 27  | 22  | w | 11  | 32  |
|    |     |                          | 2  | 5  | 6  | 7  | 5  |    | 448 |     | 04  | n | 09  | 74  |
|    |     |                          |    |    |    |    |    |    |     |     | 48  |   | 51  | 04  |
| 41 | MAP | Microtubule              | 3. | 5. | 4. | 6. | 5. | 4. | 2.9 | 1.5 | 2.9 | U | 0.0 | 0.6 |
| 31 | 1B  | associated protein       | 47 | 11 | 27 | 93 | 84 | 74 | 252 | 485 | 25  | p | 38  | 63  |
|    |     | 1B                       | 97 | 22 | 75 | 14 | 20 | 16 | 163 | 433 | 21  |   | 52  | 32  |
|    |     |                          | 3  |    | 3  | 4  | 5  |    | 55  | 33  | 63  |   | 34  | 74  |
|    |     |                          |    |    |    |    |    |    |     |     | 55  |   | 64  | 04  |
| 55 | GPR | G protein-coupled        | 9. | 9. | 9. | 7. | 8. | 8. | -2. | -1. | 2.0 | D | 0.0 | 0.6 |
| 89 | C5C | receptor, class C,       | 54 | 19 | 04 | 44 | 49 | 77 | 033 | 023 | 33  | o | 22  | 63  |
| 0  |     | group 5, member C        | 86 | 80 | 15 | 91 | 24 | 54 | 225 | 77  | 22  | w | 64  | 32  |
|    |     |                          | 9  | 8  | 8  | 8  |    | 6  | 176 |     | 51  | n | 27  | 74  |

|    |      |                     |    |    |    |    |    |    |     |     |     |    |     |     |    |
|----|------|---------------------|----|----|----|----|----|----|-----|-----|-----|----|-----|-----|----|
|    |      |                     |    |    |    |    |    |    |     |     |     | 76 |     | 79  | 04 |
| 34 | ZNF  | Zinc finger protein | 5. | 5. | 5. | 4. | 4. | 5. | -1. | -0. | 1.7 | D  | 0.0 | 0.6 |    |
| 54 | 879  | 879                 | 76 | 20 | 49 | 46 | 60 | 06 | 711 | 775 | 111 | o  | 10  | 63  |    |
| 62 |      |                     | 38 | 06 | 22 | 06 | 73 | 38 | 190 |     | 90  | w  | 75  | 32  |    |
|    |      |                     | 9  | 3  | 6  | 3  | 3  | 2  | 051 |     | 05  | n  | 84  | 74  |    |
|    |      |                     |    |    |    |    |    |    |     |     | 1   |    | 74  | 04  |    |
| 84 | TEA  | TEA domain          | 5. | 6. | 5. | 7. | 7. | 6. | 2.3 | 1.2 | 2.3 | U  | 0.0 | 0.6 |    |
| 63 | D2   | family member 2     | 24 | 46 | 75 | 48 | 60 | 10 | 667 | 428 | 66  | p  | 33  | 63  |    |
|    |      |                     | 10 | 56 | 85 | 51 | 36 | 51 | 161 | 866 | 71  |    | 80  | 32  |    |
|    |      |                     | 1  | 9  | 5  | 4  |    | 7  | 15  | 67  | 61  |    | 32  | 74  |    |
|    |      |                     |    |    |    |    |    |    |     |     | 15  |    | 01  | 04  |    |
| 99 | DLE  | Deleted in lung and | 4. | 4. | 4. | 3. | 3. | 3. | -1. | -0. | 1.5 | D  | 0.0 | 0.6 |    |
| 40 | C1   | esophageal cancer   | 37 | 39 | 28 | 63 | 78 | 78 | 531 | 615 | 31  | o  | 01  | 63  |    |
|    |      | 1                   | 24 | 20 | 65 | 86 | 17 | 50 | 749 | 18  | 74  | w  | 10  | 32  |    |
|    |      |                     | 7  | 2  |    | 8  | 6  | 1  | 096 |     | 90  | n  | 84  | 74  |    |
|    |      |                     |    |    |    |    |    |    |     |     | 96  |    | 89  | 04  |    |
| 10 | N4B  | NEDD4 binding       | 9. | 8. | 8. | 7. | 7. | 8. | -2. | -1. | 2.3 | D  | 0.0 | 0.6 |    |
| 44 | P2L2 | protein 2-like 2    | 24 | 92 | 60 | 44 | 39 | 22 | 361 | 239 | 61  | o  | 03  | 63  |    |
| 3  |      |                     | 39 | 97 | 35 | 23 | 29 | 30 | 335 | 603 | 33  | w  | 13  | 32  |    |
|    |      |                     | 5  | 8  |    | 7  | 9  | 6  | 988 | 333 | 59  | n  | 25  | 74  |    |
|    |      |                     |    |    |    |    |    |    |     |     | 88  |    | 32  | 04  |    |
| 38 | KLK  | Kallikrein B1       | 8. | 7. | 7. | 5. | 6. | 7. | -2. | -1. | 2.6 | D  | 0.0 | 0.6 |    |
| 18 | B1   |                     | 25 | 63 | 76 | 65 | 22 | 49 | 693 | 429 | 93  | o  | 16  | 63  |    |
|    |      |                     | 67 | 27 | 68 | 49 | 08 | 15 | 944 | 72  | 94  | w  | 43  | 32  |    |
|    |      |                     | 6  | 9  | 9  | 2  | 3  | 3  | 259 |     | 42  | n  | 67  | 74  |    |
|    |      |                     |    |    |    |    |    |    |     |     | 59  |    | 1   | 04  |    |
| 94 | HAN  | Heart and neural    | 6. | 8. | 7. | 10 | 9. | 8. | 4.6 | 2.2 | 4.6 | U  | 0.0 | 0.6 |    |
| 64 | D2   | crest derivatives   | 10 | 60 | 04 | .2 | 72 | 42 | 884 | 291 | 88  | p  | 15  | 63  |    |
|    |      | expressed 2         | 12 | 73 | 13 | 87 | 84 | 16 | 899 | 233 | 48  |    | 88  | 32  |    |

|    |      |                     |    |    |    |    |    |    |     |     |     |   |     |     |
|----|------|---------------------|----|----|----|----|----|----|-----|-----|-----|---|-----|-----|
|    |      |                     | 1  | 2  | 1  | 12 | 3  | 6  | 28  | 33  | 99  |   | 53  | 74  |
|    |      |                     |    |    |    |    |    |    |     |     | 28  |   | 19  | 04  |
| 55 | TME  | Transmembrane       | 9. | 8. | 8. | 8. | 8. | 8. | -1. | -0. | 1.5 | D | 0.0 | 0.6 |
| 09 | M51  | protein 51          | 44 | 86 | 89 | 26 | 31 | 62 | 592 | 671 | 92  | o | 16  | 63  |
| 2  |      |                     | 39 | 82 | 84 | 08 | 22 | 25 | 919 | 673 | 91  | w | 15  | 32  |
|    |      |                     | 9  |    | 4  | 1  | 2  | 8  | 47  | 333 | 94  | n | 16  | 74  |
|    |      |                     |    |    |    |    |    |    |     |     | 7   |   | 14  | 04  |
| 79 | TMC  | Transmembrane       | 8. | 7. | 7. | 6. | 6. | 7. | -1. | -0. | 1.6 | D | 0.0 | 0.6 |
| 83 | 5    | channel like 5      | 09 | 73 | 52 | 80 | 80 | 59 | 641 | 715 | 41  | o | 34  | 63  |
| 8  |      |                     | 93 | 15 | 75 | 76 | 55 | 95 | 744 | 23  | 74  | w | 64  | 32  |
|    |      |                     | 5  | 6  | 1  | 6  | 4  | 3  | 93  |     | 49  | n | 21  | 74  |
|    |      |                     |    |    |    |    |    |    |     |     | 3   |   | 93  | 04  |
| 27 | PDLI | PDZ and LIM         | 3. | 4. | 3. | 8. | 4. | 5. | 5.0 | 2.3 | 5.0 | U | 0.0 | 0.6 |
| 29 | M3   | domain 3            | 27 | 46 | 56 | 06 | 38 | 84 | 455 | 350 | 45  | p | 30  | 63  |
| 5  |      |                     | 34 | 53 | 01 | 87 | 95 | 57 | 795 | 2   | 57  |   | 14  | 32  |
|    |      |                     | 9  | 3  | 8  | 8  | 8  |    | 81  |     | 95  |   | 53  | 74  |
|    |      |                     |    |    |    |    |    |    |     |     | 81  |   | 72  | 04  |
| 51 | EIF3 | Eukaryotic          | 7. | 7. | 8. | 9. | 8. | 8. | 1.9 | 0.9 | 1.9 | U | 0.0 | 0.6 |
| 38 | L    | translation         | 99 | 62 | 39 | 45 | 44 | 92 | 174 | 392 | 17  | p | 18  | 63  |
| 6  |      | initiation factor 3 | 23 | 30 | 74 | 88 | 74 | 40 | 691 | 033 | 46  |   | 88  | 32  |
|    |      | subunit L           | 1  | 2  |    | 3  | 5  | 6  | 06  | 33  | 91  |   | 56  | 74  |
|    |      |                     |    |    |    |    |    |    |     |     | 06  |   | 09  | 04  |
| 46 | NAIP | NLR family,         | 5. | 6. | 5. | 6. | 6. | 6. | 1.5 | 0.6 | 1.5 | U | 0.0 | 0.6 |
| 71 |      | apoptosis           | 32 | 11 | 77 | 64 | 34 | 15 | 649 | 461 | 64  | p | 33  | 63  |
|    |      | inhibitory protein  | 23 | 15 | 08 | 21 | 77 | 31 | 356 | 033 | 93  |   | 96  | 32  |
|    |      |                     | 5  | 2  | 8  | 9  | 3  | 4  | 48  | 33  | 56  |   | 39  | 74  |
|    |      |                     |    |    |    |    |    |    |     |     | 48  |   | 74  | 04  |
| 23 | NFA  | Neurofascin         | 4. | 5. | 4. | 7. | 6. | 6. | 3.2 | 1.7 | 3.2 | U | 0.0 | 0.6 |
| 11 | SC   |                     | 30 | 80 | 87 | 94 | 01 | 17 | 800 | 137 | 80  | p | 22  | 63  |



|    |      |                     |    |    |    |    |    |    |     |     |     |   |     |     |
|----|------|---------------------|----|----|----|----|----|----|-----|-----|-----|---|-----|-----|
| 4  |      |                     | 95 | 88 | 92 | 38 | 80 | 69 | 701 | 266 | 07  |   | 37  | 32  |
|    |      |                     | 9  | 7  | 1  | 5  | 3  | 7  | 43  | 67  | 01  |   | 64  | 74  |
|    |      |                     |    |    |    |    |    |    |     |     | 43  |   | 43  | 04  |
| 27 | DIM  | DIM1                | 6. | 6. | 6. | 7. | 6. | 6. | 1.5 | 0.6 | 1.5 | U | 0.0 | 0.6 |
| 29 | T1   | dimethyladenosine   | 20 | 15 | 53 | 24 | 98 | 51 | 333 | 166 | 33  | p | 32  | 63  |
| 2  |      | transferase 1       | 29 | 67 | 40 | 44 | 47 | 45 | 177 | 566 | 31  |   | 03  | 32  |
|    |      | homolog             | 8  | 7  | 3  | 3  | 8  | 4  | 16  | 67  | 77  |   | 12  | 74  |
|    |      |                     |    |    |    |    |    |    |     |     | 16  |   | 42  | 04  |
| 30 | HIP1 | Huntingtin          | 4. | 4. | 4. | 5. | 5. | 4. | 1.8 | 0.9 | 1.8 | U | 0.0 | 0.6 |
| 92 |      | interacting protein | 06 | 47 | 10 | 73 | 23 | 39 | 687 | 020 | 68  | p | 30  | 63  |
|    |      | 1                   | 68 | 41 | 62 | 16 | 04 | 13 | 755 | 933 | 77  |   | 54  | 32  |
|    |      |                     | 4  | 2  | 1  | 8  | 7  |    | 88  | 33  | 55  |   | 18  | 74  |
|    |      |                     |    |    |    |    |    |    |     |     | 88  |   | 28  | 04  |
| 71 | TNN  | Troponin I type 2   | 10 | 10 | 9. | 6. | 7. | 9. | -3. | -1. | 3.5 | D | 0.0 | 0.6 |
| 36 | I2   | (skeletal, fast)    | .2 | .1 | 09 | 79 | 64 | 50 | 590 | 844 | 90  | o | 29  | 63  |
|    |      |                     | 03 | 78 | 87 | 93 | 24 | 61 | 280 | 096 | 28  | w | 57  | 32  |
|    |      |                     | 52 | 03 | 2  | 3  | 9  | 6  | 759 | 667 | 07  | n | 30  | 74  |
|    |      |                     |    |    |    |    |    |    |     |     | 59  |   | 83  | 04  |
| 74 | TRP  | Transient receptor  | 5. | 5. | 5. | 5. | 5. | 5. | -1. | -0. | 1.5 | D | 0.0 | 0.6 |
| 42 | V1   | potential cation    | 88 | 89 | 76 | 23 | 11 | 35 | 533 | 617 | 33  | o | 04  | 63  |
|    |      | channel, subfamily  | 85 | 68 | 87 | 17 | 95 | 10 | 927 | 23  | 92  | w | 10  | 32  |
|    |      | V, member 1         | 6  |    | 1  | 7  | 6  | 5  | 185 |     | 71  | n | 38  | 74  |
|    |      |                     |    |    |    |    |    |    |     |     | 85  |   | 71  | 04  |
| 31 | NR4  | Nuclear receptor    | 8. | 6. | 7. | 8. | 11 | 9. | 5.9 | 2.5 | 5.9 | U | 0.0 | 0.6 |
| 64 | A1   | subfamily 4 group   | 48 | 95 | 16 | 83 | .5 | 95 | 432 | 712 | 43  | p | 08  | 63  |
|    |      | A member 1          | 25 | 38 | 75 | 11 | 36 | 05 | 964 | 633 | 29  |   | 29  | 32  |
|    |      |                     | 5  | 7  | 5  | 7  | 07 | 2  | 06  | 33  | 64  |   | 11  | 74  |
|    |      |                     |    |    |    |    |    |    |     |     | 06  |   | 28  | 04  |
| 70 | TFD  | Transcription       | 8. | 8. | 8. | 7. | 7. | 8. | -1. | -0. | 1.8 | D | 0.0 | 0.6 |

|                |                           |                                                                    |                     |                     |                     |                     |                     |                     |                         |                             |                             |             |                             |                             |
|----------------|---------------------------|--------------------------------------------------------------------|---------------------|---------------------|---------------------|---------------------|---------------------|---------------------|-------------------------|-----------------------------|-----------------------------|-------------|-----------------------------|-----------------------------|
| 29             | P2                        | factor Dp-2 (E2F<br>dimerization<br>partner 2)                     | 61<br>78<br>6       | 80<br>78<br>5       | 64<br>74<br>7       | 63<br>42<br>5       | 31<br>88<br>2       | 35<br>56<br>2       | 894<br>079<br>212       | 921<br>496<br>667           | 94<br>07<br>92<br>12        | o<br>w<br>n | 11<br>71<br>14<br>46        | 63<br>32<br>74<br>04        |
| 44<br>00<br>34 | Dkfz<br>p686<br>k168<br>4 | Uncharacterized<br>LOC440034                                       | 4.<br>19<br>20<br>5 | 4.<br>23<br>30<br>9 | 4.<br>54<br>16<br>1 | 5.<br>92<br>43<br>8 | 5.<br>09<br>71<br>8 | 4.<br>64<br>42<br>9 | 1.8<br>656<br>435<br>01 | 0.8<br>996<br>733<br>33     | 1.8<br>65<br>64<br>35<br>01 | U<br>p      | 0.0<br>25<br>99<br>45<br>88 | 0.6<br>63<br>32<br>74<br>04 |
| 91<br>66<br>3  | MYA<br>DM                 | Myeloid-associated<br>differentiation<br>marker                    | 7.<br>18<br>16<br>2 | 8.<br>07<br>74<br>1 | 8.<br>00<br>45<br>4 | 9.<br>99<br>43<br>4 | 8.<br>81<br>61<br>4 | 8.<br>42<br>78<br>6 | 2.5<br>051<br>725<br>92 | 1.3<br>249<br>1<br>92       | 2.5<br>05<br>17<br>25<br>92 | U<br>p      | 0.0<br>19<br>25<br>54<br>94 | 0.6<br>63<br>32<br>74<br>04 |
| 51<br>38       | PDE<br>2A                 | Phosphodiesterase<br>2A                                            | 5.<br>86<br>45<br>6 | 6.<br>78<br>25      | 6.<br>72<br>79      | 7.<br>63<br>29<br>1 | 8.<br>16<br>58<br>3 | 6.<br>82<br>40<br>3 | 2.1<br>178<br>542<br>89 | 1.0<br>826<br>033<br>33     | 2.1<br>17<br>85<br>42<br>89 | U<br>p      | 0.0<br>28<br>98<br>28<br>76 | 0.6<br>63<br>32<br>74<br>04 |
| 31<br>18       | HLA<br>-DQ<br>A2          | Major<br>histocompatibility<br>complex, class II,<br>DQ $\alpha$ 2 | 7.<br>16<br>46      | 6.<br>85<br>72<br>4 | 6.<br>48<br>57<br>4 | 7.<br>73<br>24<br>1 | 7.<br>87<br>64<br>6 | 7.<br>13<br>24<br>2 | 1.6<br>754<br>748<br>14 | 0.7<br>445<br>7<br>48<br>14 | 1.6<br>75<br>47<br>48<br>14 | U<br>p      | 0.0<br>26<br>47<br>72<br>27 | 0.6<br>63<br>32<br>74<br>04 |
| 63<br>66       | CCL<br>21                 | Chemokine (C-C<br>motif) ligand 21                                 | 4.<br>47<br>66<br>9 | 6.<br>62<br>76<br>5 | 5.<br>96<br>48<br>8 | 7.<br>86<br>15<br>8 | 7.<br>19<br>60<br>5 | 7.<br>18<br>96<br>8 | 3.3<br>081<br>622<br>64 | 1.7<br>260<br>3<br>64       | 3.3<br>08<br>16<br>22<br>64 | U<br>p      | 0.0<br>13<br>61<br>65<br>65 | 0.6<br>63<br>32<br>74<br>04 |

|    |     |                     |    |    |    |    |    |    |     |     |     |   |     |     |
|----|-----|---------------------|----|----|----|----|----|----|-----|-----|-----|---|-----|-----|
| 13 | DPC | Diffuse             | 9. | 8. | 9. | 8. | 7. | 8. | -2. | -1. | 2.0 | D | 0.0 | 0.6 |
| 56 | R1  | panbronchiolitis    | 01 | 59 | 54 | 01 | 96 | 11 | 031 | 022 | 31  | o | 04  | 63  |
| 56 |     | critical region 1   | 87 | 89 | 94 | 66 | 56 | 73 | 436 | 5   | 43  | w | 64  | 32  |
|    |     |                     |    | 7  | 5  | 1  | 2  | 9  | 122 |     | 61  | n | 45  | 74  |
|    |     |                     |    |    |    |    |    |    |     |     | 22  |   | 15  | 04  |
| 47 | GIM | Gtpase, IMAP        | 4. | 4. | 5. | 6. | 6. | 4. | 2.2 | 1.1 | 2.2 | U | 0.0 | 0.6 |
| 43 | AP6 | family member 6     | 34 | 25 | 14 | 27 | 08 | 97 | 910 | 960 | 91  | p | 19  | 63  |
| 44 |     |                     | 13 | 82 | 43 | 12 | 72 | 35 | 887 | 333 | 08  |   | 21  | 32  |
|    |     |                     | 5  | 9  | 6  | 8  | 4  | 8  | 31  | 33  | 87  |   | 53  | 74  |
|    |     |                     |    |    |    |    |    |    |     |     | 31  |   | 47  | 04  |
| 55 | STA | Signal transducing  | 8. | 8. | 8. | 7. | 7. | 7. | -1. | -0. | 1.5 | D | 0.0 | 0.6 |
| 62 | P2  | adaptor family      | 08 | 16 | 04 | 09 | 45 | 89 | 531 | 614 | 31  | o | 28  | 63  |
| 0  |     | member 2            | 61 | 72 | 75 | 81 | 91 | 95 | 236 | 696 | 23  | w | 70  | 32  |
|    |     |                     | 7  | 8  | 6  | 4  | 9  | 9  | 014 | 667 | 60  | n | 54  | 74  |
|    |     |                     |    |    |    |    |    |    |     |     | 14  |   | 45  | 04  |
| 11 | MAR | Membrane            | 6. | 5. | 6. | 4. | 5. | 5. | -1. | -0. | 1.9 | D | 0.0 | 0.6 |
| 51 | CH3 | associated          | 83 | 71 | 16 | 97 | 03 | 82 | 945 | 960 | 45  | o | 28  | 63  |
| 23 |     | ring-CH-type        | 25 | 60 | 07 | 25 | 00 | 64 | 404 | 07  | 40  | w | 55  | 32  |
|    |     | finger 3            | 3  | 1  | 7  | 5  | 6  | 9  | 284 |     | 42  | n | 53  | 74  |
|    |     |                     |    |    |    |    |    |    |     |     | 84  |   | 76  | 04  |
| 26 | GCH | GTP                 | 8. | 7. | 8. | 6. | 6. | 7. | -2. | -1. | 2.0 | D | 0.0 | 0.6 |
| 44 | FR  | cyclohydrolase I    | 67 | 63 | 02 | 36 | 93 | 91 | 052 | 037 | 52  | o | 47  | 63  |
|    |     | feedback regulator  | 23 | 87 | 22 | 90 | 90 | 29 | 520 | 396 | 52  | w | 36  | 32  |
|    |     |                     | 3  | 8  | 1  | 7  | 9  | 7  | 55  | 667 | 05  | n | 08  | 74  |
|    |     |                     |    |    |    |    |    |    |     |     | 5   |   | 46  | 04  |
| 28 | CYP | Cytochrome P450,    | 5. | 4. | 4. | 4. | 4. | 3. | -1. | -0. | 1.5 | D | 0.0 | 0.6 |
| 54 | 4V2 | family 4, subfamily | 12 | 59 | 23 | 19 | 21 | 59 | 571 | 652 | 71  | o | 48  | 63  |
| 40 |     | V, polypeptide 2    | 83 | 58 | 50 | 04 | 43 | 68 | 926 | 533 | 92  | w | 20  | 32  |
|    |     |                     | 2  | 3  | 6  |    | 2  | 9  | 033 | 333 | 60  | n | 81  | 74  |

|    |      |                           |    |    |    |    |    |    |     |     |     |    |     |     |    |
|----|------|---------------------------|----|----|----|----|----|----|-----|-----|-----|----|-----|-----|----|
|    |      |                           |    |    |    |    |    |    |     |     |     | 33 |     | 91  | 04 |
| 15 | ATP6 | Atpase, H+                | 8. | 8. | 8. | 7. | 7. | 8. | -1. | -0. | 1.7 | D  | 0.0 | 0.6 |    |
| 50 | V0E2 | transporting V0           | 44 | 52 | 13 | 10 | 43 | 04 | 787 | 838 | 87  | o  | 15  | 63  |    |
| 66 |      | subunit e2                | 03 | 28 | 05 | 58 | 28 | 05 | 780 | 17  | 78  | w  | 55  | 32  |    |
|    |      |                           | 9  | 6  | 7  | 8  | 4  | 9  | 976 |     | 09  | n  | 24  | 74  |    |
|    |      |                           |    |    |    |    |    |    |     |     | 76  |    | 91  | 04  |    |
| 99 | DGC  | Digeorge syndrome         | 8. | 7. | 8. | 7. | 7. | 7. | -1. | -0. | 1.5 | D  | 0.0 | 0.6 |    |
| 93 | R2   | critical region gene      | 18 | 86 | 06 | 22 | 39 | 46 | 598 | 676 | 98  | o  | 04  | 63  |    |
|    |      | 2                         | 98 | 65 | 14 | 57 | 38 | 87 | 242 | 486 | 24  | w  | 40  | 32  |    |
|    |      |                           | 2  | 2  | 4  | 7  | 2  | 3  | 88  | 667 | 28  | n  | 64  | 74  |    |
|    |      |                           |    |    |    |    |    |    |     |     | 8   |    | 99  | 04  |    |
| 84 | PPFI | PTPRF interacting         | 3. | 3. | 4. | 5. | 4. | 4. | 1.7 | 0.8 | 1.7 | U  | 0.0 | 0.6 |    |
| 96 | BP1  | protein, binding          | 70 | 87 | 09 | 54 | 47 | 15 | 770 | 294 | 77  | p  | 48  | 63  |    |
|    |      | protein 1 (liprin $\beta$ | 96 | 41 | 28 | 07 | 08 | 35 | 447 | 8   | 04  |    | 02  | 32  |    |
|    |      | 1)                        | 8  |    | 2  |    |    | 4  | 35  |     | 47  |    | 61  | 74  |    |
|    |      |                           |    |    |    |    |    |    |     |     | 35  |    | 78  | 04  |    |
| 44 | MT1  | Metallothionein 1H        | 9. | 8. | 9. | 7. | 5. | 8. | -4. | -2. | 4.0 | D  | 0.0 | 0.6 |    |
| 96 | H    |                           | 64 | 88 | 18 | 80 | 53 | 36 | 012 | 004 | 12  | o  | 22  | 63  |    |
|    |      |                           | 14 | 54 | 44 | 1  | 13 | 56 | 375 | 456 | 37  | w  | 57  | 32  |    |
|    |      |                           | 3  | 8  | 3  |    | 5  | 2  | 609 | 667 | 56  | n  | 44  | 74  |    |
|    |      |                           |    |    |    |    |    |    |     |     | 09  |    | 88  | 04  |    |
| 57 | STI  | Stromal interaction       | 7. | 6. | 7. | 6. | 6. | 6. | -1. | -0. | 1.6 | D  | 0.0 | 0.6 |    |
| 62 | M2   | molecule 2                | 21 | 69 | 12 | 28 | 02 | 67 | 610 | 687 | 10  | o  | 21  | 63  |    |
| 0  |      |                           | 56 | 88 | 83 | 04 | 20 | 67 | 899 | 866 | 89  | w  | 51  | 32  |    |
|    |      |                           | 6  |    | 1  | 1  | 3  | 3  | 696 | 667 | 96  | n  | 72  | 74  |    |
|    |      |                           |    |    |    |    |    |    |     |     | 96  |    | 57  | 04  |    |
| 32 | HSD  | Hydroxysteroid            | 6. | 6. | 6. | 4. | 5. | 6. | -2. | -1. | 2.1 | D  | 0.0 | 0.6 |    |
| 93 | 17B3 | (17- $\beta$ )            | 70 | 59 | 64 | 72 | 75 | 24 | 101 | 071 | 01  | o  | 22  | 63  |    |
|    |      | dehydrogenase 3           | 36 | 70 | 33 | 36 | 88 | 77 | 287 | 273 | 28  | w  | 39  | 32  |    |

|    |      |                     |    |    |    |    |    |    |     |     |     |   |     |     |
|----|------|---------------------|----|----|----|----|----|----|-----|-----|-----|---|-----|-----|
|    |      |                     | 3  | 6  | 7  | 1  | 5  | 8  | 161 | 333 | 71  | n | 37  | 74  |
|    |      |                     |    |    |    |    |    |    |     |     | 61  |   | 48  | 04  |
| 84 | RGS  | Regulator of        | 4. | 5. | 5. | 8. | 8. | 6. | 7.8 | 2.9 | 7.8 | U | 0.0 | 0.6 |
| 90 | 5    | G-protein signaling | 53 | 28 | 70 | 80 | 97 | 64 | 256 | 682 | 25  | p | 02  | 63  |
|    |      | 5                   | 38 | 54 | 33 | 88 | 19 | 65 | 106 | 033 | 61  |   | 31  | 32  |
|    |      |                     | 8  | 5  | 7  | 2  | 2  | 7  | 51  | 33  | 06  |   | 52  | 74  |
|    |      |                     |    |    |    |    |    |    |     |     | 51  |   | 53  | 04  |
| 19 | EGR  | Early growth        | 4. | 4. | 4. | 7. | 7. | 7. | 6.9 | 2.7 | 6.9 | U | 1.8 | 0.1 |
| 59 | 2    | response 2          | 30 | 99 | 09 | 01 | 56 | 20 | 590 | 988 | 59  | p | 30  | 19  |
|    |      |                     | 75 | 15 | 67 | 96 | 36 | 93 | 803 | 966 | 08  |   | 31  | 19  |
|    |      |                     | 8  | 3  | 2  | 2  |    |    | 58  | 67  | 03  |   | E-0 | 56  |
|    |      |                     |    |    |    |    |    |    |     |     | 58  |   | 5   | 43  |
| 64 | POL  | Polymerase (RNA)    | 4. | 4. | 4. | 5. | 4. | 4. | 1.6 | 0.6 | 1.6 | U | 0.0 | 0.6 |
| 42 | R1E  | I polypeptide E     | 04 | 22 | 53 | 39 | 80 | 64 | 076 | 849 | 07  | p | 22  | 63  |
| 5  |      |                     | 00 | 33 | 00 | 65 | 71 | 45 | 499 | 533 | 64  |   | 99  | 32  |
|    |      |                     | 9  | 5  | 1  | 5  | 7  | 9  | 78  | 33  | 99  |   | 36  | 74  |
|    |      |                     |    |    |    |    |    |    |     |     | 78  |   | 1   | 04  |
| 10 | RAB  | RAB40B, member      | 8. | 7. | 7. | 7. | 7. | 7. | -1. | -0. | 1.5 | D | 0.0 | 0.6 |
| 96 | 40B  | RAS oncogene        | 31 | 88 | 94 | 58 | 13 | 66 | 502 | 587 | 02  | o | 27  | 63  |
| 6  |      | family              | 70 | 22 | 10 | 47 | 20 | 05 | 817 | 67  | 81  | w | 60  | 32  |
|    |      |                     | 9  |    | 5  |    | 8  | 5  | 686 |     | 76  | n | 17  | 74  |
|    |      |                     |    |    |    |    |    |    |     |     | 86  |   | 83  | 04  |
| 28 | CES4 | Carboxylesterase    | 3. | 3. | 4. | 2. | 3. | 3. | -1. | -0. | 1.6 | D | 0.0 | 0.6 |
| 38 | A    | 4A                  | 81 | 91 | 10 | 68 | 22 | 87 | 604 | 682 | 04  | o | 48  | 63  |
| 48 |      |                     | 36 | 56 | 62 | 18 | 78 | 86 | 829 | 42  | 82  | w | 45  | 32  |
|    |      |                     | 8  | 2  | 1  |    | 2  | 3  | 466 |     | 94  | n | 40  | 74  |
|    |      |                     |    |    |    |    |    |    |     |     | 66  |   | 21  | 04  |
| 22 | FCG  | Fc fragment of igg, | 5. | 6. | 5. | 6. | 6. | 6. | 1.8 | 0.8 | 1.8 | U | 0.0 | 0.6 |
| 12 | R2A  | low affinity iia,   | 07 | 37 | 77 | 81 | 79 | 29 | 633 | 979 | 63  | p | 33  | 63  |

|                |              |                                                                       |                     |                     |                      |                      |                      |                      |                          |                          |                             |                  |                             |                             |
|----------------|--------------|-----------------------------------------------------------------------|---------------------|---------------------|----------------------|----------------------|----------------------|----------------------|--------------------------|--------------------------|-----------------------------|------------------|-----------------------------|-----------------------------|
|                |              | receptor (CD32)                                                       | 52<br>1             | 17<br>6             | 02<br>4              | 95<br>4              | 57<br>1              | 56<br>8              | 775<br>28                | 2                        | 37<br>75<br>28              |                  | 49<br>89<br>37              | 32<br>74<br>04              |
| 12<br>77<br>03 | C1orf<br>216 | Chromosome 1<br>open reading frame<br>216                             | 5.<br>55<br>46<br>2 | 5.<br>91<br>89<br>2 | 5.<br>69<br>44<br>7  | 7.<br>10<br>56<br>4  | 6.<br>33<br>34<br>5  | 5.<br>92<br>88<br>5  | 1.6<br>624<br>489<br>05  | 0.7<br>333<br>1          | 1.6<br>62<br>44<br>89<br>05 | U<br>p           | 0.0<br>47<br>57<br>98<br>75 | 0.6<br>63<br>32<br>74<br>04 |
| 34<br>25<br>38 | NAC<br>A2    | Nascent<br>polypeptide-associ<br>ated complex $\alpha$<br>subunit 2   | 9.<br>71<br>90<br>5 | 9.<br>29<br>93<br>6 | 10<br>.1<br>36<br>06 | 10<br>.7<br>26<br>41 | 10<br>.1<br>91<br>68 | 10<br>.2<br>03<br>59 | 1.5<br>754<br>201<br>86  | 0.6<br>557<br>366<br>67  | 1.5<br>75<br>42<br>01<br>86 | U<br>p           | 0.0<br>40<br>37<br>88<br>97 | 0.6<br>63<br>32<br>74<br>04 |
| 95<br>86       | CRE<br>B5    | Camp responsive<br>element binding<br>protein 5                       | 8.<br>18<br>14<br>3 | 7.<br>27<br>37<br>5 | 7.<br>63<br>15<br>5  | 6.<br>85<br>09<br>6  | 6.<br>80<br>51<br>7  | 7.<br>36<br>54<br>9  | -1.<br>611<br>461<br>812 | -0.<br>688<br>37         | 1.6<br>11<br>46<br>18<br>12 | D<br>o<br>w<br>n | 0.0<br>42<br>32<br>68<br>55 | 0.6<br>63<br>32<br>74<br>04 |
| 28<br>4        | ANG<br>PT1   | Angiopietin 1                                                         | 4.<br>88<br>31<br>7 | 6.<br>66<br>76<br>8 | 5.<br>35<br>14<br>8  | 7.<br>64<br>72<br>7  | 6.<br>91<br>77<br>6  | 6.<br>64<br>90<br>5  | 2.7<br>080<br>417<br>85  | 1.4<br>372<br>5          | 2.7<br>08<br>04<br>17<br>85 | U<br>p           | 0.0<br>20<br>50<br>84<br>86 | 0.6<br>63<br>32<br>74<br>04 |
| 83<br>53<br>9  | CHS<br>T9    | Carbohydrate<br>(N-acetylgalactosa<br>mine 4-0)<br>sulfotransferase 9 | 5.<br>75<br>41<br>3 | 4.<br>97<br>65<br>6 | 5.<br>32<br>76<br>6  | 4.<br>20<br>8<br>7   | 4.<br>66<br>18<br>4  | 4.<br>70<br>23<br>4  | -1.<br>776<br>076<br>02  | -0.<br>828<br>693<br>333 | 1.7<br>76<br>07<br>60<br>2  | D<br>o<br>w<br>n | 0.0<br>11<br>32<br>69<br>85 | 0.6<br>63<br>32<br>74<br>04 |
| 51             | GINS         | GINS complex                                                          | 3.                  | 3.                  | 3.                   | 4.                   | 4.                   | 3.                   | 1.8                      | 0.9                      | 1.8                         | U                | 0.0                         | 0.6                         |

|    |      |                    |    |    |    |    |    |    |     |     |     |   |     |     |
|----|------|--------------------|----|----|----|----|----|----|-----|-----|-----|---|-----|-----|
| 65 | 2    | subunit 2 (Psf2    | 08 | 44 | 34 | 28 | 81 | 48 | 670 | 007 | 67  | p | 26  | 63  |
| 9  |      | homolog)           | 32 | 97 | 66 | 66 | 45 | 07 | 061 | 266 | 00  |   | 03  | 32  |
|    |      |                    | 6  | 7  | 2  | 1  | 1  | 1  | 33  | 67  | 61  |   | 65  | 74  |
|    |      |                    |    |    |    |    |    |    |     |     | 33  |   | 28  | 04  |
| 31 | HLA  | Major              | 7. | 6. | 6. | 7. | 7. | 7. | 1.6 | 0.7 | 1.6 | U | 0.0 | 0.6 |
| 17 | -DQ  | histocompatibility | 16 | 85 | 48 | 73 | 87 | 13 | 754 | 445 | 75  | p | 26  | 63  |
|    | A1   | complex, class II, | 46 | 72 | 57 | 24 | 64 | 24 | 748 | 7   | 47  |   | 47  | 32  |
|    |      | DQ $\alpha$ 1      |    | 4  | 4  | 1  | 6  | 2  | 14  |     | 48  |   | 72  | 74  |
|    |      |                    |    |    |    |    |    |    |     |     | 14  |   | 27  | 04  |
| 75 | ZFP3 | ZFP36 ring finger  | 10 | 9. | 10 | 10 | 12 | 11 | 2.2 | 1.1 | 2.2 | U | 0.0 | 0.6 |
| 38 | 6    | protein            | .6 | 81 | .6 | .9 | .2 | .2 | 269 | 551 | 26  | p | 19  | 63  |
|    |      |                    | 47 | 65 | 01 | 73 | 87 | 69 | 975 |     | 99  |   | 94  | 32  |
|    |      |                    | 28 | 6  | 18 | 39 | 88 | 05 | 95  |     | 75  |   | 61  | 74  |
|    |      |                    |    |    |    |    |    |    |     |     | 95  |   | 79  | 04  |
| 88 | TSC2 | TSC22 domain       | 6. | 6. | 7. | 7. | 7. | 7. | 1.9 | 0.9 | 1.9 | U | 0.0 | 0.6 |
| 48 | 2D1  | family member 1    | 80 | 43 | 03 | 52 | 77 | 79 | 205 | 415 | 20  | p | 02  | 63  |
|    |      |                    | 83 | 98 | 31 | 91 | 92 | 74 | 550 | 233 | 55  |   | 24  | 32  |
|    |      |                    | 5  | 3  | 1  | 2  | 6  | 8  | 71  | 33  | 50  |   | 77  | 74  |
|    |      |                    |    |    |    |    |    |    |     |     | 71  |   | 97  | 04  |
| 96 | CD6  | CD69 molecule      | 4. | 3. | 4. | 5. | 6. | 4. | 2.6 | 1.4 | 2.6 | U | 0.0 | 0.6 |
| 9  | 9    |                    | 11 | 60 | 46 | 73 | 20 | 50 | 763 | 202 | 76  | p | 15  | 63  |
|    |      |                    | 51 | 09 | 55 | 16 | 56 | 50 | 250 | 533 | 32  |   | 14  | 32  |
|    |      |                    | 6  |    | 6  | 8  | 5  | 5  | 24  | 33  | 50  |   | 56  | 74  |
|    |      |                    |    |    |    |    |    |    |     |     | 24  |   | 91  | 04  |
| 94 | TNF  | Tumor necrosis     | 4. | 4. | 4. | 3. | 3. | 4. | -1. | -0. | 1.5 | D | 0.0 | 0.6 |
| 3  | RSF8 | factor receptor    | 31 | 47 | 15 | 32 | 65 | 15 | 520 | 604 | 20  | o | 30  | 63  |
|    |      | superfamily        | 43 | 96 | 88 | 42 | 64 | 88 | 395 | 446 | 39  | w | 24  | 32  |
|    |      | member 8           | 4  | 7  | 2  | 5  | 2  | 2  | 507 | 667 | 55  | n | 96  | 74  |
|    |      |                    |    |    |    |    |    |    |     |     | 07  |   | 1   | 04  |

|                |              |                                                             |                      |                     |                      |                     |                     |                     |                          |                          |                             |                  |                             |                             |
|----------------|--------------|-------------------------------------------------------------|----------------------|---------------------|----------------------|---------------------|---------------------|---------------------|--------------------------|--------------------------|-----------------------------|------------------|-----------------------------|-----------------------------|
| 23<br>17<br>7  | CEP6<br>8    | Centrosomal<br>protein 68kda                                | 6.<br>94<br>28<br>9  | 7.<br>22<br>69<br>4 | 7.<br>43<br>88<br>9  | 8.<br>38<br>25<br>8 | 7.<br>96<br>13<br>4 | 7.<br>67<br>36<br>6 | 1.7<br>446<br>689<br>76  | 0.8<br>029<br>533<br>33  | 1.7<br>44<br>66<br>89<br>76 | U<br>p           | 0.0<br>10<br>99<br>73<br>81 | 0.6<br>63<br>32<br>74<br>04 |
| 23<br>09<br>0  | ZNF<br>423   | Zinc finger protein<br>423                                  | 5.<br>29<br>20<br>5  | 5.<br>78<br>49<br>8 | 6.<br>44<br>60<br>2  | 7.<br>36<br>95<br>2 | 7.<br>45<br>58<br>1 | 6.<br>05<br>47<br>1 | 2.1<br>719<br>586<br>94  | 1.1<br>189<br>966<br>67  | 2.1<br>71<br>95<br>86<br>94 | U<br>p           | 0.0<br>40<br>91<br>76<br>43 | 0.6<br>63<br>32<br>74<br>04 |
| 66<br>7        | DST          | Dystonin                                                    | 5.<br>25<br>85<br>7  | 5.<br>38<br>56<br>2 | 5.<br>59<br>05<br>3  | 6.<br>26<br>61<br>9 | 6.<br>05<br>82<br>8 | 5.<br>81<br>57<br>1 | 1.5<br>531<br>028<br>09  | 0.6<br>351<br>533<br>33  | 1.5<br>53<br>10<br>28<br>09 | U<br>p           | 0.0<br>10<br>49<br>20<br>22 | 0.6<br>63<br>32<br>74<br>04 |
| 52<br>56       | PHK<br>A2    | Phosphorylase<br>kinase, $\alpha$ 2 (liver)                 | 8.<br>73<br>98<br>5  | 8.<br>51<br>78<br>1 | 7.<br>96<br>28<br>3  | 7.<br>44<br>01<br>6 | 7.<br>69<br>66<br>5 | 8.<br>05<br>42<br>2 | -1.<br>598<br>242<br>88  | -0.<br>676<br>486<br>667 | 1.5<br>98<br>24<br>28<br>8  | D<br>o<br>w<br>n | 0.0<br>34<br>90<br>70<br>41 | 0.6<br>63<br>32<br>74<br>04 |
| 15<br>53<br>82 | VPS3<br>7D   | Vacuolar protein<br>sorting 37 homolog<br>D (S. Cerevisiae) | 7.<br>14<br>54<br>9  | 6.<br>64<br>80<br>1 | 6.<br>56<br>96<br>8  | 6.<br>01<br>16<br>6 | 6.<br>08<br>31<br>9 | 6.<br>39<br>94<br>7 | -1.<br>540<br>024<br>533 | -0.<br>622<br>953<br>333 | 1.5<br>40<br>02<br>45<br>33 | D<br>o<br>w<br>n | 0.0<br>22<br>77<br>40<br>13 | 0.6<br>63<br>32<br>74<br>04 |
| 28<br>97<br>0  | C11o<br>rf54 | Chromosome 11<br>open reading frame<br>54                   | 10<br>.5<br>10<br>57 | 9.<br>75<br>72<br>7 | 10<br>.0<br>04<br>66 | 8.<br>70<br>20<br>7 | 9.<br>05<br>92<br>8 | 9.<br>63<br>91<br>5 | -1.<br>941<br>717<br>52  | -0.<br>957<br>333<br>333 | 1.9<br>41<br>71<br>75       | D<br>o<br>w<br>n | 0.0<br>14<br>54<br>07       | 0.6<br>63<br>32<br>74       |



|               |             |                                                                |                     |                     |                     |                     |                     |                     |                         |                             |                             |             |                             |                             |    |
|---------------|-------------|----------------------------------------------------------------|---------------------|---------------------|---------------------|---------------------|---------------------|---------------------|-------------------------|-----------------------------|-----------------------------|-------------|-----------------------------|-----------------------------|----|
|               |             |                                                                |                     |                     |                     |                     |                     |                     |                         |                             |                             | 2           |                             | 74                          | 04 |
| 69<br>25      | TCF4        | Transcription<br>factor 4                                      | 4.<br>51<br>2       | 5.<br>70<br>88<br>6 | 5.<br>67<br>89<br>2 | 7.<br>54<br>84      | 6.<br>96<br>16      | 6.<br>17<br>09<br>2 | 3.0<br>182<br>521<br>44 | 1.5<br>937<br>133<br>33     | 3.0<br>18<br>25<br>21<br>44 | U<br>p      | 0.0<br>08<br>99<br>46<br>54 | 0.6<br>63<br>32<br>74<br>04 |    |
| 23<br>10<br>7 | MRP<br>S27  | Mitochondrial<br>ribosomal protein<br>S27                      | 4.<br>77<br>83      | 4.<br>04<br>26<br>7 | 4.<br>75<br>15<br>3 | 5.<br>66<br>05<br>3 | 5.<br>00<br>77<br>5 | 4.<br>98<br>03<br>1 | 1.6<br>155<br>551<br>49 | 0.6<br>920<br>3<br>49       | 1.6<br>15<br>55<br>51<br>49 | U<br>p      | 0.0<br>41<br>32<br>48<br>47 | 0.6<br>63<br>32<br>74<br>04 |    |
| 66<br>78      | SPA<br>RC   | Secreted protein,<br>acidic,<br>cysteine-rich<br>(osteonectin) | 3.<br>73<br>86<br>4 | 5.<br>74<br>48<br>5 | 5.<br>77<br>62<br>3 | 9.<br>80<br>91<br>1 | 7.<br>38<br>79<br>2 | 6.<br>69<br>76<br>1 | 7.3<br>528<br>658<br>65 | 2.8<br>783<br>066<br>67     | 7.3<br>52<br>86<br>58<br>65 | U<br>p      | 0.0<br>14<br>09<br>49<br>62 | 0.6<br>63<br>32<br>74<br>04 |    |
| 79<br>63<br>0 | Clorf<br>54 | Chromosome 1<br>open reading frame<br>54                       | 6.<br>91<br>55<br>1 | 7.<br>67<br>44<br>3 | 7.<br>13<br>40<br>3 | 8.<br>60<br>08<br>9 | 8.<br>21<br>85<br>9 | 7.<br>89<br>09<br>3 | 1.9<br>937<br>437<br>55 | 0.9<br>954<br>8<br>37<br>55 | 1.9<br>93<br>74<br>37<br>55 | U<br>p      | 0.0<br>07<br>50<br>55<br>72 | 0.6<br>63<br>32<br>74<br>04 |    |
| 12<br>11      | CLT<br>A    | Clathrin, light<br>chain A                                     | 3.<br>82<br>08<br>6 | 4.<br>06<br>86<br>9 | 4.<br>17<br>88<br>1 | 4.<br>69<br>82<br>5 | 4.<br>53<br>06<br>6 | 4.<br>61<br>23<br>9 | 1.5<br>062<br>695<br>85 | 0.5<br>909<br>8<br>95       | 1.5<br>06<br>26<br>95<br>85 | U<br>p      | 0.0<br>04<br>48<br>87<br>02 | 0.6<br>63<br>32<br>74<br>04 |    |
| 10<br>63<br>6 | RGS<br>14   | Regulator of<br>G-protein signaling<br>14                      | 7.<br>43<br>53      | 7.<br>31<br>91      | 7.<br>62<br>15      | 6.<br>43<br>88      | 6.<br>74<br>43      | 7.<br>01<br>26      | -1.<br>654<br>864       | -0.<br>726<br>713           | 1.6<br>54<br>86             | D<br>o<br>w | 0.0<br>07<br>97             | 0.6<br>63<br>32             |    |

|    |      |                    |    |    |    |    |    |    |     |     |     |   |     |     |
|----|------|--------------------|----|----|----|----|----|----|-----|-----|-----|---|-----|-----|
|    |      |                    | 3  | 5  | 1  | 3  | 7  | 5  | 774 | 333 | 47  | n | 40  | 74  |
|    |      |                    |    |    |    |    |    |    |     |     | 74  |   | 51  | 04  |
| 64 | IGK  | Immunoglobulin κ   | 5. | 4. | 5. | 6. | 9. | 8. | 6.6 | 2.7 | 6.6 | U | 0.0 | 0.6 |
| 24 | V10  | variable 1/OR10-1  | 42 | 89 | 48 | 01 | 11 | 90 | 900 | 420 | 90  | p | 09  | 63  |
| 24 | R10- | (pseudogene)       | 99 | 86 | 02 | 56 | 58 | 33 | 175 | 1   | 01  |   | 79  | 32  |
|    | 1    |                    | 9  | 3  | 1  | 4  | 5  | 7  | 71  |     | 75  |   | 54  | 74  |
|    |      |                    |    |    |    |    |    |    |     |     | 71  |   | 34  | 04  |
| 31 | HLA  | Major              | 4. | 4. | 7. | 9. | 9. | 8. | 8.0 | 3.0 | 8.0 | U | 0.0 | 0.6 |
| 15 | -DPB | histocompatibility | 96 | 91 | 88 | 07 | 36 | 34 | 388 | 069 | 38  | p | 06  | 63  |
|    | 1    | complex, class II, | 26 | 58 | 30 | 23 | 69 | 32 | 734 | 933 | 87  |   | 56  | 32  |
|    |      | DP β 1             | 9  | 2  | 2  | 4  | 3  | 4  | 16  | 33  | 34  |   | 01  | 74  |
|    |      |                    |    |    |    |    |    |    |     |     | 16  |   | 82  | 04  |
| 25 | SLC3 | Solute carrier     | 4. | 4. | 4. | 6. | 4. | 5. | 1.7 | 0.7 | 1.7 | U | 0.0 | 0.6 |
| 80 | 9A6  | family 39 (zinc    | 55 | 44 | 99 | 03 | 82 | 50 | 294 | 902 | 29  | p | 42  | 63  |
| 0  |      | transporter),      | 47 | 70 | 31 | 53 | 59 | 45 | 260 | 933 | 42  |   | 77  | 32  |
|    |      | member 6           | 9  | 6  | 3  | 8  | 7  | 1  | 59  | 33  | 60  |   | 52  | 74  |
|    |      |                    |    |    |    |    |    |    |     |     | 59  |   | 4   | 04  |
| 79 | SCD  | Stearoyl-coa       | 6. | 6. | 5. | 7. | 7. | 6. | 2.2 | 1.1 | 2.2 | U | 0.0 | 0.6 |
| 96 | 5    | desaturase 5       | 97 | 11 | 40 | 63 | 61 | 78 | 581 | 751 | 58  | p | 28  | 63  |
| 6  |      |                    | 88 | 51 | 65 | 03 | 36 | 20 | 531 | 433 | 15  |   | 24  | 32  |
|    |      |                    | 6  |    | 8  | 3  |    | 4  | 48  | 33  | 31  |   | 24  | 74  |
|    |      |                    |    |    |    |    |    |    |     |     | 48  |   | 8   | 04  |
| 54 | PON  | Paraoxonase 1      | 4. | 3. | 3. | 2. | 3. | 3. | -1. | -0. | 1.8 | D | 0.0 | 0.6 |
| 44 | 1    |                    | 05 | 83 | 51 | 29 | 17 | 37 | 806 | 853 | 06  | o | 22  | 63  |
|    |      |                    | 57 | 53 | 69 | 08 | 95 | 75 | 753 | 4   | 75  | w | 65  | 32  |
|    |      |                    | 7  | 7  | 6  | 1  | 9  |    | 889 |     | 38  | n | 83  | 74  |
|    |      |                    |    |    |    |    |    |    |     |     | 89  |   | 39  | 04  |
| 11 | AP2  | Adaptor-related    | 8. | 8. | 8. | 9. | 9. | 9. | 1.6 | 0.7 | 1.6 | U | 0.0 | 0.6 |
| 73 | M1   | protein complex 2, | 35 | 47 | 92 | 47 | 15 | 29 | 529 | 250 | 52  | p | 08  | 63  |

|                           |                          |                                                                  |                     |                     |                     |                     |                     |                     |                         |                         |                             |        |                             |                             |
|---------------------------|--------------------------|------------------------------------------------------------------|---------------------|---------------------|---------------------|---------------------|---------------------|---------------------|-------------------------|-------------------------|-----------------------------|--------|-----------------------------|-----------------------------|
|                           |                          | mu 1 subunit                                                     | 24<br>1             | 37<br>6             | 50<br>6             | 97<br>2             | 55<br>9             | 09<br>9             | 273<br>7                | 233<br>33               | 92<br>73<br>7               |        | 66<br>66<br>64              | 32<br>74<br>04              |
| 62<br>28                  | RPS2<br>3                | Ribosomal protein<br>S23                                         | 8.<br>49<br>04      | 8.<br>99<br>33<br>3 | 9.<br>09<br>37<br>7 | 9.<br>99<br>3       | 9.<br>47<br>29<br>1 | 9.<br>25<br>79<br>2 | 1.6<br>419<br>877<br>15 | 0.7<br>154<br>433<br>33 | 1.6<br>41<br>98<br>77<br>15 | U<br>p | 0.0<br>26<br>20<br>35<br>58 | 0.6<br>63<br>32<br>74<br>04 |
| 57<br>80<br>1             | HES<br>4                 | Hes family bhlh<br>transcription factor<br>4                     | 6.<br>00<br>37<br>5 | 7.<br>00<br>57<br>4 | 6.<br>07<br>23<br>4 | 7.<br>80<br>93<br>2 | 7.<br>18<br>12<br>9 | 7.<br>08<br>56<br>8 | 1.9<br>974<br>600<br>75 | 0.9<br>981<br>666<br>67 | 1.9<br>97<br>46<br>00<br>75 | U<br>p | 0.0<br>18<br>96<br>24<br>35 | 0.6<br>63<br>32<br>74<br>04 |
| 95<br>3                   | ENT<br>PD1               | Ectonucleoside<br>triphosphate<br>diphosphohydrolas<br>e 1       | 3.<br>79<br>12<br>3 | 5.<br>47<br>20<br>4 | 4.<br>48<br>59<br>1 | 6.<br>60<br>84<br>3 | 6.<br>09<br>13<br>4 | 5.<br>48<br>74<br>9 | 2.7<br>882<br>501<br>51 | 1.4<br>793<br>6<br>51   | 2.7<br>88<br>25<br>01<br>51 | U<br>p | 0.0<br>14<br>92<br>86<br>91 | 0.6<br>63<br>32<br>74<br>04 |
| 33<br>95<br>62<br>18      | IGK<br>V10<br>R2-1<br>18 | Immunoglobulin $\kappa$<br>variable<br>1/OR2-118<br>(pseudogene) | 5.<br>42<br>99<br>9 | 4.<br>89<br>86<br>3 | 5.<br>48<br>02<br>1 | 6.<br>01<br>56<br>4 | 9.<br>11<br>58<br>5 | 8.<br>90<br>33<br>7 | 6.6<br>900<br>175<br>71 | 2.7<br>420<br>1<br>75   | 6.6<br>90<br>01<br>75<br>71 | U<br>p | 0.0<br>09<br>79<br>54<br>34 | 0.6<br>63<br>32<br>74<br>04 |
| 10<br>01<br>31<br>54<br>1 | LOC<br>1001<br>3154<br>1 | Uncharacterized<br>LOC100131541                                  | 4.<br>99<br>23<br>4 | 5.<br>47<br>23<br>9 | 5.<br>42<br>64<br>3 | 7.<br>16<br>54<br>6 | 6.<br>18<br>05<br>5 | 5.<br>75<br>52<br>8 | 2.0<br>994<br>964<br>28 | 1.0<br>700<br>433<br>33 | 2.0<br>99<br>49<br>64<br>28 | U<br>p | 0.0<br>21<br>39<br>89<br>1  | 0.6<br>63<br>32<br>74<br>04 |
| 11                        | CHN                      | Chimerin 2                                                       | 7.                  | 7.                  | 7.                  | 6.                  | 6.                  | 7.                  | -1.                     | -0.                     | 1.8                         | D      | 0.0                         | 0.6                         |

|    |      |                     |    |    |    |    |    |    |     |     |     |   |     |     |
|----|------|---------------------|----|----|----|----|----|----|-----|-----|-----|---|-----|-----|
| 24 | 2    |                     | 67 | 55 | 75 | 91 | 23 | 23 | 822 | 866 | 22  | o | 13  | 63  |
|    |      |                     | 79 | 51 | 39 | 09 | 97 | 80 | 754 | 12  | 75  | w | 69  | 32  |
|    |      |                     | 5  | 5  | 4  | 1  | 6  | 1  | 167 |     | 41  | n | 54  | 74  |
|    |      |                     |    |    |    |    |    |    |     |     | 67  |   | 28  | 04  |
| 23 | SEL1 | Sel-1 suppressor of | 12 | 11 | 11 | 10 | 10 | 11 | -1. | -0. | 1.7 | D | 0.0 | 0.6 |
| 23 | L3   | lin-12-like 3 (C.   | .0 | .7 | .8 | .8 | .9 | .3 | 771 | 824 | 71  | o | 02  | 63  |
| 1  |      | Elegans)            | 37 | 72 | 36 | 47 | 70 | 54 | 338 | 84  | 33  | w | 66  | 32  |
|    |      |                     | 82 | 51 | 35 | 53 | 14 | 49 | 58  |     | 85  | n | 15  | 74  |
|    |      |                     |    |    |    |    |    |    |     |     | 8   |   | 62  | 04  |
| 55 | TME  | Transmembrane       | 5. | 6. | 6. | 8. | 8. | 8. | 6.2 | 2.6 | 6.2 | U | 4.4 | 0.0 |
| 27 | M10  | protein 100         | 59 | 01 | 18 | 48 | 78 | 43 | 002 | 323 | 00  | p | 54  | 43  |
| 3  | 0    |                     | 74 | 86 | 73 | 46 | 32 | 24 | 798 | 333 | 27  |   | 57  | 85  |
|    |      |                     | 5  | 6  |    | 8  | 7  | 6  | 51  | 33  | 98  |   | E-0 | 47  |
|    |      |                     |    |    |    |    |    |    |     |     | 51  |   | 6   | 1   |
| 10 | IGLL | Immunoglobulin      | 4. | 4. | 4. | 5. | 6. | 5. | 2.1 | 1.1 | 2.1 | U | 0.0 | 0.6 |
| 04 | 5    | lambda-like         | 55 | 63 | 74 | 04 | 59 | 63 | 663 | 152 | 66  | p | 18  | 63  |
| 23 |      | polypeptide 5       | 85 | 56 | 19 | 92 | 54 | 71 | 104 | 4   | 31  |   | 80  | 32  |
| 06 |      |                     | 3  | 7  |    | 9  | 3  |    | 38  |     | 04  |   | 78  | 74  |
| 2  |      |                     |    |    |    |    |    |    |     |     | 38  |   | 32  | 04  |
| 14 | MYL  | Myosin light chain  | 5. | 6. | 6. | 7. | 6. | 6. | 1.5 | 0.6 | 1.5 | U | 0.0 | 0.6 |
| 04 | 6B   | 6B                  | 67 | 32 | 05 | 13 | 47 | 37 | 596 | 412 | 59  | p | 47  | 63  |
| 65 |      |                     | 71 | 46 | 33 | 14 | 14 | 59 | 691 | 4   | 66  |   | 64  | 32  |
|    |      |                     | 5  | 6  | 6  | 1  | 9  | 9  | 23  |     | 91  |   | 24  | 74  |
|    |      |                     |    |    |    |    |    |    |     |     | 23  |   | 28  | 04  |
| 48 | NID1 | Nidogen 1           | 4. | 7. | 6. | 9. | 8. | 7. | 3.9 | 1.9 | 3.9 | U | 0.0 | 0.6 |
| 11 |      |                     | 69 | 80 | 34 | 21 | 00 | 62 | 981 | 993 | 98  | p | 37  | 63  |
|    |      |                     | 83 | 93 | 11 | 38 | 46 | 83 | 427 | 3   | 14  |   | 51  | 32  |
|    |      |                     | 2  | 2  | 8  | 5  | 3  | 3  | 97  |     | 27  |   | 53  | 74  |
|    |      |                     |    |    |    |    |    |    |     |     | 97  |   | 15  | 04  |

|    |     |                          |    |    |    |    |    |    |     |     |     |   |     |     |
|----|-----|--------------------------|----|----|----|----|----|----|-----|-----|-----|---|-----|-----|
| 44 | MSH | Muts homolog 5           | 7. | 7. | 7. | 7. | 6. | 6. | -1. | -0. | 1.5 | D | 0.0 | 0.6 |
| 39 | 5   |                          | 65 | 26 | 30 | 10 | 82 | 52 | 500 | 585 | 00  | o | 26  | 63  |
|    |     |                          | 11 | 02 | 47 | 70 | 43 | 80 | 607 | 546 | 60  | w | 58  | 32  |
|    |     |                          | 2  |    | 4  | 7  | 1  | 4  | 492 | 667 | 74  | n | 68  | 74  |
|    |     |                          |    |    |    |    |    |    |     |     | 92  |   | 01  | 04  |
| 11 | KCT | Potassium channel        | 5. | 6. | 7. | 8. | 8. | 7. | 3.0 | 1.6 | 3.0 | U | 0.0 | 0.6 |
| 52 | D12 | tetramerization          | 97 | 52 | 11 | 89 | 35 | 20 | 655 | 161 | 65  | p | 11  | 63  |
| 07 |     | domain containing        | 27 | 10 |    | 22 | 81 | 19 | 798 | 6   | 57  |   | 01  | 32  |
|    |     | 12                       | 8  | 4  |    |    | 6  | 4  | 85  |     | 98  |   | 20  | 74  |
|    |     |                          |    |    |    |    |    |    |     |     | 85  |   | 15  | 04  |
| 10 | TOM | Target of myb1           | 8. | 7. | 7. | 6. | 6. | 7. | -1. | -0. | 1.6 | D | 0.0 | 0.6 |
| 04 | 1   | membrane                 | 18 | 92 | 81 | 81 | 97 | 90 | 675 | 744 | 75  | o | 44  | 63  |
| 3  |     | trafficking protein      | 80 | 27 | 14 | 12 | 18 | 52 | 536 | 623 | 53  | w | 08  | 32  |
|    |     |                          | 6  | 4  | 8  | 8  | 6  | 7  | 754 | 333 | 67  | n | 42  | 74  |
|    |     |                          |    |    |    |    |    |    |     |     | 54  |   | 18  | 04  |
| 26 | HSP | Heat shock protein       | 5. | 6. | 5. | 8. | 6. | 7. | 3.2 | 1.6 | 3.2 | U | 0.0 | 0.6 |
| 35 | B8  | family B (small)         | 21 | 88 | 18 | 73 | 51 | 07 | 012 | 786 | 01  | p | 41  | 63  |
| 3  |     | member 8                 | 20 | 98 | 90 | 98 | 49 | 20 | 011 | 133 | 20  |   | 64  | 32  |
|    |     |                          | 1  | 8  | 7  | 5  | 4  | 1  | 52  | 33  | 11  |   | 13  | 74  |
|    |     |                          |    |    |    |    |    |    |     |     | 52  |   | 75  | 04  |
| 64 | NUC | Nuclear casein           | 7. | 6. | 7. | 8. | 7. | 7. | 1.8 | 0.8 | 1.8 | U | 0.0 | 0.6 |
| 71 | KS1 | kinase and               | 43 | 29 | 39 | 29 | 49 | 99 | 494 | 870 | 49  | p | 43  | 63  |
| 0  |     | cyclin-dependent         | 18 | 46 | 45 | 97 | 12 | 13 | 333 | 833 | 43  |   | 40  | 32  |
|    |     | kinase substrate 1       | 9  | 1  | 8  | 4  | 3  | 6  | 81  | 33  | 33  |   | 46  | 74  |
|    |     |                          |    |    |    |    |    |    |     |     | 81  |   | 97  | 04  |
| 20 | TUB | Tubulin, $\beta$ class I | 8. | 7. | 8. | 9. | 8. | 8. | 1.5 | 0.6 | 1.5 | U | 0.0 | 0.6 |
| 30 | B   |                          | 21 | 90 | 41 | 02 | 68 | 78 | 740 | 544 | 74  | p | 111 | 63  |
| 68 |     |                          | 25 | 59 | 06 | 69 | 00 | 54 | 048 | 4   | 00  |   | 80  | 32  |
|    |     |                          | 6  | 2  |    | 1  | 2  | 7  | 65  |     | 48  |   | 71  | 74  |

|               |            |                                                                            |                     |                     |                     |                     |                     |                     |                          |                             |                             |                  |                             |                             |    |
|---------------|------------|----------------------------------------------------------------------------|---------------------|---------------------|---------------------|---------------------|---------------------|---------------------|--------------------------|-----------------------------|-----------------------------|------------------|-----------------------------|-----------------------------|----|
|               |            |                                                                            |                     |                     |                     |                     |                     |                     |                          |                             |                             | 65               |                             | 2                           | 04 |
| 47<br>39      | NED<br>D9  | Neural precursor<br>cell expressed,<br>developmentally<br>down-regulated 9 | 4.<br>01<br>12<br>7 | 3.<br>93<br>06<br>4 | 4.<br>49<br>02<br>1 | 5.<br>56<br>39<br>2 | 5.<br>88<br>54<br>6 | 4.<br>73<br>85<br>1 | 2.3<br>815<br>871<br>35  | 1.2<br>519<br>233<br>33     | 2.3<br>81<br>58<br>71<br>35 | U<br>p           | 0.0<br>05<br>34<br>03<br>54 | 0.6<br>63<br>32<br>74<br>04 |    |
| 83<br>48<br>3 | PLV<br>AP  | Plasmalemma<br>vesicle associated<br>protein                               | 4.<br>99<br>67<br>2 | 5.<br>94<br>70<br>8 | 5.<br>69<br>44<br>5 | 7.<br>09<br>10<br>5 | 7.<br>56<br>34<br>2 | 6.<br>01<br>80<br>3 | 2.5<br>398<br>618<br>02  | 1.3<br>447<br>5<br>18<br>02 | 2.5<br>39<br>86<br>18<br>02 | U<br>p           | 0.0<br>16<br>56<br>82<br>44 | 0.6<br>63<br>32<br>74<br>04 |    |
| 73<br>4       | OSGI<br>N2 | Oxidative stress<br>induced growth<br>inhibitor family<br>member 2         | 6.<br>92<br>88<br>2 | 6.<br>32<br>61<br>7 | 6.<br>80<br>91<br>3 | 5.<br>68<br>62<br>5 | 6.<br>04<br>35<br>8 | 6.<br>45<br>07<br>4 | -1.<br>545<br>260<br>427 | -0.<br>627<br>85<br>04      | 1.5<br>45<br>26<br>04<br>27 | D<br>o<br>w<br>n | 0.0<br>45<br>04<br>53<br>33 | 0.6<br>63<br>32<br>74<br>04 |    |
| 56<br>14<br>7 | PCD<br>HA1 | Protocadherin $\alpha$ 1                                                   | 7.<br>44<br>20<br>9 | 7.<br>73<br>45<br>2 | 6.<br>91<br>29<br>9 | 6.<br>53<br>69<br>2 | 6.<br>83<br>18<br>2 | 6.<br>80<br>31<br>1 | -1.<br>557<br>526<br>454 | -0.<br>639<br>256<br>667    | 1.5<br>57<br>52<br>64<br>54 | D<br>o<br>w<br>n | 0.0<br>31<br>81<br>64<br>86 | 0.6<br>63<br>32<br>74<br>04 |    |
| 54<br>51<br>0 | PCD<br>H18 | Protocadherin 18                                                           | 4.<br>27<br>42<br>8 | 6.<br>11<br>49<br>9 | 5.<br>92<br>27<br>3 | 7.<br>97<br>37<br>8 | 6.<br>76<br>33<br>8 | 6.<br>78<br>98<br>6 | 3.3<br>365<br>103<br>98  | 1.7<br>383<br>4<br>03<br>98 | 3.3<br>36<br>51<br>03<br>98 | U<br>p           | 0.0<br>16<br>14<br>67<br>81 | 0.6<br>63<br>32<br>74<br>04 |    |
| 10<br>23<br>1 | RCA<br>N2  | Regulator of<br>calcineurin 2                                              | 3.<br>83<br>86      | 5.<br>71<br>16      | 6.<br>03<br>73      | 7.<br>37<br>47      | 6.<br>40<br>30      | 6.<br>29<br>50      | 2.8<br>188<br>238        | 1.4<br>950<br>933           | 2.8<br>18<br>82             | U<br>p           | 0.0<br>40<br>16             | 0.6<br>63<br>32             |    |

|    |      |                          |    |    |    |    |    |    |     |     |     |   |     |     |
|----|------|--------------------------|----|----|----|----|----|----|-----|-----|-----|---|-----|-----|
|    |      |                          | 6  | 7  | 1  | 9  | 8  | 5  | 65  | 33  | 38  |   | 28  | 74  |
|    |      |                          |    |    |    |    |    |    |     |     | 65  |   | 15  | 04  |
| 23 | SIRT | Sirtuin 4                | 4. | 4. | 4. | 3. | 4. | 4. | -1. | -0. | 1.6 | D | 0.0 | 0.6 |
| 40 | 4    |                          | 55 | 57 | 62 | 28 | 02 | 32 | 632 | 706 | 32  | o | 29  | 63  |
| 9  |      |                          | 42 | 93 | 65 | 72 | 79 | 43 | 243 | 856 | 24  | w | 24  | 32  |
|    |      |                          | 3  | 4  | 7  | 9  | 6  | 2  | 919 | 667 | 39  | n | 67  | 74  |
|    |      |                          |    |    |    |    |    |    |     |     | 19  |   | 06  | 04  |
| 12 | DEG  | $\Delta$ (4)-desaturase, | 8. | 9. | 8. | 6. | 7. | 8. | -2. | -1. | 2.2 | D | 0.0 | 0.6 |
| 30 | S2   | sphingolipid 2           | 99 | 01 | 94 | 83 | 91 | 74 | 225 | 153 | 25  | o | 33  | 63  |
| 99 |      |                          | 14 | 47 | 87 | 37 | 88 | 08 | 063 | 846 | 06  | w | 92  | 32  |
|    |      |                          | 1  | 4  | 7  | 1  | 6  | 1  | 743 | 667 | 37  | n | 31  | 74  |
|    |      |                          |    |    |    |    |    |    |     |     | 43  |   | 8   | 04  |
| 94 | PPP1 | Protein                  | 5. | 8. | 6. | 10 | 8. | 8. | 5.0 | 2.3 | 5.0 | U | 0.0 | 0.6 |
| 27 | R14  | phosphatase 1            | 92 | 84 | 10 | .8 | 31 | 66 | 089 | 245 | 08  | p | 43  | 63  |
| 4  | A    | regulatory inhibitor     | 57 | 20 | 80 | 72 | 19 | 55 | 793 | 166 | 97  |   | 32  | 32  |
|    |      | subunit 14A              | 8  | 4  | 4  |    | 1  |    | 59  | 67  | 93  |   | 97  | 74  |
|    |      |                          |    |    |    |    |    |    |     |     | 59  |   | 1   | 04  |
| 62 | RPS1 | Ribosomal protein        | 7. | 6. | 7. | 8. | 8. | 7. | 1.8 | 0.8 | 1.8 | U | 0.0 | 0.6 |
| 10 | 5A   | s15a                     | 24 | 63 | 63 | 32 | 06 | 73 | 288 | 709 | 28  | p | 19  | 63  |
|    |      |                          | 46 | 87 | 22 | 65 | 63 | 56 | 879 | 666 | 88  |   | 39  | 32  |
|    |      |                          | 2  | 7  | 3  | 2  | 2  | 8  | 22  | 67  | 79  |   | 93  | 74  |
|    |      |                          |    |    |    |    |    |    |     |     | 22  |   | 12  | 04  |
| 10 | LRR  | Leucine rich repeat      | 3. | 3. | 3. | 5. | 5. | 4. | 2.6 | 1.3 | 2.6 | U | 0.0 | 0.6 |
| 01 | C70  | containing 70            | 29 | 49 | 49 | 08 | 36 | 03 | 376 | 992 | 37  | p | 03  | 63  |
| 30 |      |                          | 25 | 99 | 52 | 58 | 68 | 28 | 991 | 8   | 69  |   | 80  | 32  |
| 73 |      |                          | 6  | 2  |    | 7  | 1  | 4  | 07  |     | 91  |   | 01  | 74  |
| 3  |      |                          |    |    |    |    |    |    |     |     | 07  |   | 24  | 04  |
| 12 | CNN  | Calponin 3, acidic       | 7. | 7. | 8. | 8. | 8. | 8. | 2.1 | 1.0 | 2.1 | U | 0.0 | 0.6 |
| 66 | 3    |                          | 18 | 33 | 11 | 80 | 78 | 28 | 135 | 796 | 13  | p | 07  | 63  |

|    |     |                     |    |    |    |    |    |    |     |     |     |   |     |     |
|----|-----|---------------------|----|----|----|----|----|----|-----|-----|-----|---|-----|-----|
|    |     |                     | 07 | 21 | 62 | 04 | 58 | 18 | 330 | 566 | 53  |   | 21  | 32  |
|    |     |                     | 2  | 8  | 6  | 5  | 2  | 6  | 42  | 67  | 30  |   | 06  | 74  |
|    |     |                     |    |    |    |    |    |    |     |     | 42  |   | 77  | 04  |
| 57 | RHO | Ras homolog         | 3. | 4. | 3. | 5. | 5. | 4. | 2.3 | 1.2 | 2.3 | U | 0.0 | 0.6 |
| 38 | J   | family member J     | 24 | 11 | 75 | 49 | 03 | 19 | 052 | 049 | 05  | p | 13  | 63  |
| 1  |     |                     | 18 | 95 | 04 | 98 | 25 | 43 | 555 | 266 | 25  |   | 01  | 32  |
|    |     |                     | 6  | 7  | 7  |    | 7  | 1  | 13  | 67  | 55  |   | 38  | 74  |
|    |     |                     |    |    |    |    |    |    |     |     | 13  |   | 66  | 04  |
| 80 | ESR | Epithelial splicing | 8. | 8. | 8. | 7. | 8. | 7. | -1. | -0. | 1.7 | D | 0.0 | 0.6 |
| 00 | P2  | regulatory protein  | 80 | 79 | 41 | 53 | 19 | 93 | 718 | 781 | 18  | o | 09  | 63  |
| 4  |     | 2                   | 87 | 45 | 12 | 47 | 77 | 83 | 647 | 273 | 64  | w | 78  | 32  |
|    |     |                     | 6  | 6  | 4  | 2  | 1  | 1  | 094 | 333 | 70  | n | 82  | 74  |
|    |     |                     |    |    |    |    |    |    |     |     | 94  |   | 44  | 04  |
| 37 | JUN | Jun                 | 9. | 7. | 9. | 9. | 10 | 10 | 2.2 | 1.1 | 2.2 | U | 0.0 | 0.6 |
| 25 |     | proto-oncogene      | 07 | 94 | 06 | 16 | .2 | .1 | 638 | 787 | 63  | p | 24  | 63  |
|    |     |                     | 76 | 19 | 17 | 07 | 83 | 73 | 159 | 566 | 81  |   | 71  | 32  |
|    |     |                     | 3  | 4  | 3  | 9  | 55 | 23 | 44  | 67  | 59  |   | 28  | 74  |
|    |     |                     |    |    |    |    |    |    |     |     | 44  |   | 42  | 04  |
| 56 | MAS | Mannan-binding      | 6. | 6. | 6. | 5. | 5. | 6. | -1. | -0. | 1.8 | D | 0.0 | 0.6 |
| 48 | P1  | lectin serine       | 56 | 65 | 78 | 77 | 44 | 19 | 813 | 858 | 13  | o | 05  | 63  |
|    |     | peptidase 1 (C4/C2  | 01 | 79 | 25 | 91 | 73 | 71 | 763 | 986 | 76  | w | 86  | 32  |
|    |     | activating          | 1  | 7  | 5  | 8  | 5  | 4  | 895 | 667 | 38  | n | 65  | 74  |
|    |     | component of        |    |    |    |    |    |    |     |     | 95  |   | 93  | 04  |
|    |     | Ra-reactive factor) |    |    |    |    |    |    |     |     |     |   |     |     |
| 23 | MTC | Microtubule         | 11 | 10 | 10 | 9. | 10 | 10 | -2. | -1. | 2.0 | D | 0.0 | 0.6 |
| 25 | L1  | crosslinking factor | .1 | .6 | .8 | 04 | .1 | .3 | 028 | 020 | 28  | o | 23  | 63  |
| 5  |     | 1                   | 33 | 90 | 11 | 02 | 43 | 89 | 926 | 716 | 92  | w | 42  | 32  |
|    |     |                     | 56 | 19 | 37 | 5  | 72 |    | 59  | 667 | 65  | n | 59  | 74  |
|    |     |                     |    |    |    |    |    |    |     |     | 9   |   | 63  | 04  |



|    |      |                            |    |    |    |    |    |    |     |     |     |   |     |     |
|----|------|----------------------------|----|----|----|----|----|----|-----|-----|-----|---|-----|-----|
| 29 | GUC  | Guanylate cyclase          | 7. | 6. | 7. | 8. | 8. | 7. | 1.8 | 0.8 | 1.8 | U | 0.0 | 0.6 |
| 83 | Y1B  | 1, soluble, $\beta$ 3      | 23 | 76 | 17 | 11 | 30 | 41 | 494 | 870 | 49  | p | 13  | 63  |
|    | 3    |                            | 58 | 19 | 32 | 15 | 34 | 72 | 248 | 766 | 42  |   | 36  | 32  |
|    |      |                            | 9  | 6  | 2  | 5  | 8  | 7  | 34  | 67  | 48  |   | 38  | 74  |
|    |      |                            |    |    |    |    |    |    |     |     | 34  |   | 7   | 04  |
| 11 | TSE  | Trna splicing              | 5. | 4. | 5. | 6. | 5. | 5. | 1.5 | 0.6 | 1.5 | U | 0.0 | 0.6 |
| 64 | N15  | endonuclease               | 38 | 80 | 28 | 13 | 47 | 73 | 417 | 245 | 41  | p | 35  | 63  |
| 61 |      | subunit 15                 | 49 | 51 | 01 | 92 | 20 | 25 | 547 | 733 | 75  |   | 35  | 32  |
|    |      |                            |    | 2  | 5  | 6  | 8  | 5  | 95  | 33  | 47  |   | 63  | 74  |
|    |      |                            |    |    |    |    |    |    |     |     | 95  |   | 25  | 04  |
| 84 | PAR  | Par-6 family cell          | 5. | 6. | 5. | 3. | 5. | 5. | -1. | -0. | 1.9 | D | 0.0 | 0.6 |
| 61 | D6B  | polarity regulator $\beta$ | 64 | 04 | 19 | 83 | 09 | 03 | 962 | 972 | 62  | o | 38  | 63  |
| 2  |      |                            | 78 | 57 | 53 | 78 | 39 | 83 | 836 | 94  | 83  | w | 79  | 32  |
|    |      |                            | 4  | 2  | 9  | 7  | 5  | 1  | 494 |     | 64  | n | 82  | 74  |
|    |      |                            |    |    |    |    |    |    |     |     | 94  |   | 48  | 04  |
| 10 | LOC  | Cytochrome P450,           | 6. | 5. | 5. | 5. | 4. | 4. | -1. | -0. | 1.8 | D | 0.0 | 0.6 |
| 19 | 1019 | family 2, subfamily        | 31 | 89 | 46 | 44 | 70 | 76 | 896 | 923 | 96  | o | 15  | 63  |
| 29 | 2982 | D, polypeptide 6           | 07 |    | 89 | 01 | 02 | 00 | 137 | 063 | 13  | w | 23  | 32  |
| 82 | 9    | pseudogene                 | 3  |    | 6  | 5  | 8  | 7  | 168 | 333 | 71  | n | 86  | 74  |
| 9  |      |                            |    |    |    |    |    |    |     |     | 68  |   | 05  | 04  |
| 65 | SPAT | Spermatogenesis            | 7. | 7. | 7. | 6. | 6. | 6. | -1. | -0. | 1.7 | D | 0.0 | 0.6 |
| 24 | S2   | associated, serine         | 72 | 12 | 33 | 14 | 76 | 89 | 728 | 789 | 28  | o | 18  | 63  |
| 4  |      | rich 2                     | 20 | 31 | 06 | 74 | 57 | 37 | 643 | 64  | 64  | w | 58  | 32  |
|    |      |                            | 4  | 1  | 6  | 3  | 2  | 4  | 055 |     | 30  | n | 20  | 74  |
|    |      |                            |    |    |    |    |    |    |     |     | 55  |   | 6   | 04  |
| 42 | MID  | Midline 1                  | 5. | 5. | 4. | 6. | 6. | 5. | 1.7 | 0.8 | 1.7 | U | 0.0 | 0.6 |
| 81 | 1    |                            | 64 | 83 | 91 | 89 | 14 | 83 | 720 | 253 | 72  | p | 49  | 63  |
|    |      |                            | 75 | 87 | 45 | 85 | 72 | 12 | 221 | 966 | 02  |   | 55  | 32  |
|    |      |                            | 3  | 4  | 7  | 1  | 4  | 8  | 86  | 67  | 21  |   | 70  | 74  |

|                |             |                                                                                        |                     |                     |                     |                     |                     |                       |                          |                               |                             |                  |                             |                             |
|----------------|-------------|----------------------------------------------------------------------------------------|---------------------|---------------------|---------------------|---------------------|---------------------|-----------------------|--------------------------|-------------------------------|-----------------------------|------------------|-----------------------------|-----------------------------|
|                |             |                                                                                        |                     |                     |                     |                     |                     |                       |                          |                               | 86                          |                  | 87                          | 04                          |
| 47<br>72       | NFA<br>TC1  | Nuclear factor of<br>activated T-cells,<br>cytoplasmic,<br>calcineurin-depend<br>ent 1 | 4.<br>31<br>53<br>1 | 4.<br>75<br>87<br>9 | 4.<br>49<br>00<br>4 | 5.<br>35<br>01<br>4 | 5.<br>46<br>98<br>6 | 4.<br>78<br>76<br>2   | 1.6<br>034<br>284<br>75  | 0.6<br>811<br>6<br>84<br>75   | 1.6<br>03<br>42<br>84<br>75 | U<br>p           | 0.0<br>18<br>97<br>94<br>19 | 0.6<br>63<br>32<br>74<br>04 |
| 11<br>32<br>20 | KIF1<br>2   | Kinesin family<br>member 12                                                            | 9.<br>09<br>51<br>5 | 8.<br>94<br>33<br>5 | 9.<br>02<br>42<br>5 | 8.<br>47<br>39<br>5 | 8.<br>01<br>24<br>4 | 8.<br>76<br>63<br>174 | -1.<br>519<br>226<br>667 | -0.<br>603<br>336<br>61<br>74 | 1.5<br>19<br>22<br>61<br>74 | D<br>o<br>w<br>n | 0.0<br>26<br>94<br>67<br>62 | 0.6<br>63<br>32<br>74<br>04 |
| 51<br>40<br>9  | HEM<br>K1   | Hemk<br>methyltransferase<br>family member 1                                           | 5.<br>38<br>17<br>1 | 5.<br>32<br>34<br>5 | 4.<br>94<br>47<br>5 | 4.<br>46<br>06<br>1 | 4.<br>59<br>89<br>6 | 4.<br>78<br>39<br>7   | -1.<br>517<br>949<br>014 | -0.<br>602<br>123<br>333      | 1.5<br>17<br>94<br>90<br>14 | D<br>o<br>w<br>n | 0.0<br>11<br>66<br>35<br>81 | 0.6<br>63<br>32<br>74<br>04 |
| 80<br>02<br>5  | PAN<br>K2   | Pantothenate<br>kinase 2                                                               | 5.<br>64<br>80<br>8 | 5.<br>74<br>51<br>9 | 5.<br>64<br>43<br>6 | 6.<br>44<br>93<br>6 | 6.<br>66<br>56<br>9 | 5.<br>82<br>47<br>9   | 1.5<br>519<br>370<br>07  | 0.6<br>340<br>7<br>07         | 1.5<br>51<br>93<br>70<br>07 | U<br>p           | 0.0<br>31<br>45<br>21<br>64 | 0.6<br>63<br>32<br>74<br>04 |
| 81<br>69<br>3  | AMN         | Amnion associated<br>transmembrane<br>protein                                          | 9.<br>98<br>27<br>1 | 9.<br>66<br>54<br>5 | 9.<br>62<br>18<br>3 | 7.<br>33<br>66<br>3 | 8.<br>65<br>95<br>7 | 9.<br>52<br>76<br>7   | -2.<br>376<br>304<br>969 | -1.<br>248<br>72<br>49<br>69  | 2.3<br>76<br>30<br>49<br>69 | D<br>o<br>w<br>n | 0.0<br>43<br>15<br>14<br>7  | 0.6<br>63<br>32<br>74<br>04 |
| 50<br>81<br>0  | HDG<br>FRP3 | Hepatoma-derived<br>growth factor,<br>related protein 3                                | 4.<br>16<br>88      | 4.<br>80<br>78      | 4.<br>60<br>02      | 6.<br>00<br>80      | 6.<br>36<br>88      | 5.<br>16<br>89        | 2.5<br>017<br>656        | 1.3<br>229<br>466             | 2.5<br>01<br>76             | U<br>p           | 0.0<br>05<br>16             | 0.6<br>63<br>32             |

|    |      |                    |    |    |    |    |    |    |     |     |     |   |     |     |
|----|------|--------------------|----|----|----|----|----|----|-----|-----|-----|---|-----|-----|
|    |      |                    | 6  | 6  | 2  | 7  |    | 1  | 74  | 67  | 56  |   | 94  | 74  |
|    |      |                    |    |    |    |    |    |    |     |     | 74  |   | 93  | 04  |
| 19 | EGF  | Epidermal growth   | 7. | 7. | 7. | 6. | 7. | 7. | -1. | -0. | 1.5 | D | 0.0 | 0.6 |
| 56 | R    | factor receptor    | 91 | 92 | 94 | 72 | 41 | 67 | 579 | 659 | 79  | o | 36  | 63  |
|    |      |                    | 76 | 60 | 13 | 00 | 48 | 22 | 341 | 323 | 34  | w | 20  | 32  |
|    |      |                    | 5  | 6  | 7  | 1  | 8  | 2  | 692 | 333 | 16  | n | 74  | 74  |
|    |      |                    |    |    |    |    |    |    |     |     | 92  |   | 17  | 04  |
| 42 | CTA  | CTAGE family       | 8. | 8. | 8. | 7. | 7. | 8. | -1. | -0. | 1.7 | D | 0.0 | 0.6 |
| 53 | GE5  | member 5           | 88 | 52 | 99 | 41 | 93 | 63 | 750 | 808 | 50  | o | 38  | 63  |
|    |      |                    | 10 | 65 | 88 | 39 | 51 | 29 | 899 | 096 | 89  | w | 52  | 32  |
|    |      |                    | 7  | 3  | 4  | 7  | 9  | 9  | 973 | 667 | 99  | n | 84  | 74  |
|    |      |                    |    |    |    |    |    |    |     |     | 73  |   | 68  | 04  |
| 63 | CCL  | Chemokine (C-C     | 5. | 6. | 6. | 6. | 8. | 7. | 2.2 | 1.1 | 2.2 | U | 0.0 | 0.6 |
| 51 | 4    | motif) ligand 4    | 72 | 37 | 64 | 68 | 05 | 55 | 685 | 817 | 68  | p | 19  | 63  |
|    |      |                    | 31 | 54 | 34 | 61 | 00 | 12 | 807 | 9   | 58  |   | 15  | 32  |
|    |      |                    | 6  | 2  | 5  |    | 8  | 2  | 29  |     | 07  |   | 84  | 74  |
|    |      |                    |    |    |    |    |    |    |     |     | 29  |   | 57  | 04  |
| 36 | ABC  | ATP binding        | 7. | 7. | 7. | 6. | 6. | 6. | -1. | -0. | 1.8 | D | 0.0 | 0.6 |
| 8  | C6   | cassette subfamily | 42 | 06 | 51 | 07 | 38 | 99 | 803 | 850 | 03  | o | 15  | 63  |
|    |      | C member 6         | 96 | 80 | 23 | 26 | 87 | 57 | 717 | 973 | 71  | w | 50  | 32  |
|    |      |                    | 8  | 4  | 4  | 4  | 5  | 5  | 417 | 333 | 74  | n | 61  | 74  |
|    |      |                    |    |    |    |    |    |    |     |     | 17  |   | 17  | 04  |
| 57 | VPS1 | VPS18,             | 8. | 8. | 7. | 7. | 7. | 7. | -1. | -0. | 1.6 | D | 0.0 | 0.6 |
| 61 | 8    | CORVET/HOPS        | 15 | 50 | 60 | 16 | 39 | 56 | 639 | 712 | 39  | o | 26  | 63  |
| 7  |      | core subunit       | 12 | 31 | 96 | 26 | 77 | 46 | 156 | 953 | 15  | w | 73  | 32  |
|    |      |                    | 1  | 3  | 5  | 9  | 5  | 9  | 193 | 333 | 61  | n | 50  | 74  |
|    |      |                    |    |    |    |    |    |    |     |     | 93  |   | 54  | 04  |
| 30 | ANX  | Annexin A5         | 6. | 4. | 6. | 7. | 7. | 7. | 2.4 | 1.3 | 2.4 | U | 0.0 | 0.6 |
| 8  | A5   |                    | 18 | 97 | 92 | 78 | 10 | 13 | 838 | 125 | 83  | p | 29  | 63  |

|    |      |                    |    |    |    |    |    |    |     |     |     |   |     |     |
|----|------|--------------------|----|----|----|----|----|----|-----|-----|-----|---|-----|-----|
|    |      |                    | 30 | 56 | 73 | 64 | 39 | 32 | 246 | 633 | 82  |   | 52  | 32  |
|    |      |                    | 3  | 3  |    | 6  |    | 9  | 6   | 33  | 46  |   | 06  | 74  |
|    |      |                    |    |    |    |    |    |    |     |     | 6   |   | 23  | 04  |
| 95 | ADA  | ADAM               | 2. | 3. | 2. | 5. | 6. | 3. | 3.6 | 1.8 | 3.6 | U | 0.0 | 0.6 |
| 07 | MTS  | metallopeptidase   | 76 | 51 | 93 | 03 | 28 | 46 | 132 | 533 | 13  | p | 24  | 63  |
|    | 4    | with               | 35 | 7  | 64 | 12 | 47 | 09 | 990 | 166 | 29  |   | 48  | 32  |
|    |      | thrombospondin     | 2  |    | 2  | 2  | 7  |    | 6   | 67  | 90  |   | 38  | 74  |
|    |      | type 1 motif 4     |    |    |    |    |    |    |     |     | 6   |   | 18  | 04  |
| 83 | CCD  | Coiled-coil domain | 4. | 4. | 4. | 6. | 5. | 4. | 2.3 | 1.2 | 2.3 | U | 0.0 | 0.6 |
| 98 | C8   | containing 8       | 07 | 75 | 07 | 62 | 32 | 70 | 790 | 503 | 79  | p | 34  | 63  |
| 7  |      |                    | 10 | 48 | 20 | 5  | 17 | 23 | 682 | 966 | 06  |   | 62  | 32  |
|    |      |                    | 3  | 8  | 2  |    | 8  | 4  | 61  | 67  | 82  |   | 66  | 74  |
|    |      |                    |    |    |    |    |    |    |     |     | 61  |   | 94  | 04  |
| 22 | WDR  | WD repeat domain   | 5. | 5. | 5. | 6. | 6. | 6. | 1.5 | 0.6 | 1.5 | U | 0.0 | 0.6 |
| 91 | 47   | 47                 | 52 | 61 | 77 | 48 | 30 | 05 | 607 | 422 | 60  | p | 07  | 63  |
| 1  |      |                    | 80 | 54 | 62 | 36 | 45 | 82 | 866 | 733 | 78  |   | 99  | 32  |
|    |      |                    | 6  |    | 3  | 7  | 6  | 8  | 39  | 33  | 66  |   | 48  | 74  |
|    |      |                    |    |    |    |    |    |    |     |     | 39  |   | 25  | 04  |
| 17 | DXO  | Decapping          | 5. | 6. | 5. | 7. | 7. | 6. | 2.6 | 1.3 | 2.6 | U | 0.0 | 0.6 |
| 97 |      | exoribonuclease    | 45 | 81 | 52 | 65 | 58 | 72 | 160 | 873 | 16  | p | 13  | 63  |
|    |      |                    | 80 | 72 | 93 | 81 | 09 | 77 | 497 | 9   | 04  |   | 85  | 32  |
|    |      |                    | 2  | 6  | 5  | 3  |    | 7  | 91  |     | 97  |   | 90  | 74  |
|    |      |                    |    |    |    |    |    |    |     |     | 91  |   | 96  | 04  |
| 22 | MM   | Multimerin 1       | 4. | 5. | 5. | 6. | 7. | 6. | 3.2 | 1.6 | 3.2 | U | 0.0 | 0.6 |
| 91 | RN1  |                    | 31 | 33 | 26 | 74 | 19 | 03 | 144 | 845 | 14  | p | 03  | 63  |
| 5  |      |                    | 48 | 18 | 92 | 25 | 04 | 66 | 234 | 6   | 42  |   | 04  | 32  |
|    |      |                    | 8  | 9  | 2  |    | 9  | 8  | 63  |     | 34  |   | 86  | 74  |
|    |      |                    |    |    |    |    |    |    |     |     | 63  |   | 74  | 04  |
| 40 | LRP5 | LDL receptor       | 8. | 8. | 7. | 7. | 7. | 7. | -1. | -0. | 1.5 | D | 0.0 | 0.6 |

|    |       |                      |    |    |    |    |    |    |     |     |     |   |     |     |
|----|-------|----------------------|----|----|----|----|----|----|-----|-----|-----|---|-----|-----|
| 41 |       | related protein 5    | 35 | 04 | 90 | 12 | 55 | 83 | 510 | 594 | 10  | o | 36  | 63  |
|    |       |                      | 32 | 29 | 68 | 41 | 93 | 44 | 448 | 976 | 44  | w | 41  | 32  |
|    |       |                      | 2  | 3  | 1  | 9  | 8  | 6  | 156 | 667 | 81  | n | 23  | 74  |
|    |       |                      |    |    |    |    |    |    |     |     | 56  |   | 07  | 04  |
| 27 | TNF   | Tumor necrosis       | 6. | 5. | 5. | 6. | 6. | 5. | 1.6 | 0.7 | 1.6 | U | 0.0 | 0.6 |
| 24 | RSF2  | factor receptor      | 11 | 19 | 60 | 65 | 56 | 94 | 792 | 478 | 79  | p | 39  | 63  |
| 2  | 1     | superfamily          | 96 | 53 | 79 | 06 | 75 | 83 | 883 | 5   | 28  |   | 57  | 32  |
|    |       | member 21            | 4  | 9  | 8  | 4  | 8  | 4  | 78  |     | 83  |   | 16  | 74  |
|    |       |                      |    |    |    |    |    |    |     |     | 78  |   | 31  | 04  |
| 57 | C6orf | Chromosome 6         | 7. | 6. | 6. | 6. | 6. | 6. | -1. | -0. | 1.5 | D | 0.0 | 0.6 |
| 82 | 47    | open reading frame   | 33 | 83 | 80 | 44 | 33 | 42 | 501 | 585 | 01  | o | 18  | 63  |
| 7  |       | 47                   | 08 | 51 | 45 | 83 | 74 | 68 | 051 | 973 | 05  | w | 18  | 32  |
|    |       |                      | 6  | 7  | 4  | 4  | 5  | 6  | 352 | 333 | 13  | n | 05  | 74  |
|    |       |                      |    |    |    |    |    |    |     |     | 52  |   | 57  | 04  |
| 12 | ADH   | Alcohol              | 10 | 9. | 11 | 8. | 8. | 10 | -2. | -1. | 2.2 | D | 0.0 | 0.6 |
| 6  | 1C    | dehydrogenase 1C     | .4 | 97 | .0 | 86 | 95 | .1 | 209 | 143 | 09  | o | 27  | 63  |
|    |       | (class I), $\gamma$  | 32 | 39 | 13 | 58 | 41 | 69 | 214 | 533 | 21  | w | 46  | 32  |
|    |       | polypeptide          | 96 | 2  | 09 | 1  | 4  | 42 | 242 | 333 | 42  | n | 24  | 74  |
|    |       |                      |    |    |    |    |    |    |     |     | 42  |   | 77  | 04  |
| 32 | HPN   | Hepsin               | 9. | 9. | 9. | 6. | 6. | 8. | -4. | -2. | 4.2 | D | 0.0 | 0.6 |
| 49 |       |                      | 27 | 22 | 10 | 39 | 37 | 57 | 238 | 083 | 38  | o | 08  | 63  |
|    |       |                      | 47 | 38 | 02 | 64 | 34 | 84 | 420 | 526 | 42  | w | 11  | 32  |
|    |       |                      | 6  | 9  | 5  | 4  | 1  | 7  | 324 | 667 | 03  | n | 01  | 74  |
|    |       |                      |    |    |    |    |    |    |     |     | 24  |   | 61  | 04  |
| 25 | ASP   | Aspartate            | 9. | 8. | 8. | 7. | 7. | 8. | -1. | -0. | 1.8 | D | 0.0 | 0.6 |
| 39 | HD1   | $\beta$ -hydroxylase | 40 | 80 | 95 | 73 | 99 | 79 | 845 | 884 | 45  | o | 23  | 63  |
| 82 |       | domain containing    | 86 | 51 | 78 | 32 | 39 | 13 | 928 | 346 | 92  | w | 89  | 32  |
|    |       | 1                    | 2  | 9  |    | 5  | 4  | 8  | 492 | 667 | 84  | n | 43  | 74  |
|    |       |                      |    |    |    |    |    |    |     |     | 92  |   | 84  | 04  |

|                |                    |                                                                                      |                     |                     |                     |                     |                     |                     |                          |                              |                             |                  |                             |                             |
|----------------|--------------------|--------------------------------------------------------------------------------------|---------------------|---------------------|---------------------|---------------------|---------------------|---------------------|--------------------------|------------------------------|-----------------------------|------------------|-----------------------------|-----------------------------|
| 16<br>40<br>91 | PAQ<br>R7          | Progestin and<br>adipoq receptor<br>family member VII                                | 7.<br>20<br>00<br>7 | 7.<br>18<br>78<br>4 | 6.<br>90<br>00<br>9 | 5.<br>96<br>82<br>4 | 5.<br>65<br>08      | 6.<br>76<br>86<br>9 | -1.<br>954<br>441<br>857 | -0.<br>966<br>756<br>667     | 1.9<br>54<br>44<br>18<br>57 | D<br>o<br>w<br>n | 0.0<br>13<br>82<br>01<br>38 | 0.6<br>63<br>32<br>74<br>04 |
| 98<br>06       | SPO<br>CK2         | Sparc/osteonectin,<br>cwcv and<br>kazal-like domains<br>proteoglycan<br>(testican) 2 | 7.<br>58<br>72<br>3 | 7.<br>23<br>84<br>3 | 8.<br>27<br>79      | 5.<br>35<br>07      | 6.<br>37<br>52<br>2 | 7.<br>45<br>49<br>9 | -2.<br>475<br>191<br>247 | -1.<br>307<br>54<br>12<br>47 | 2.4<br>75<br>19<br>12<br>47 | D<br>o<br>w<br>n | 0.0<br>43<br>52<br>53<br>76 | 0.6<br>63<br>32<br>74<br>04 |
| 64<br>41<br>0  | KLH<br>L25         | Kelch like family<br>member 25                                                       | 6.<br>01<br>05<br>7 | 6.<br>14<br>03<br>5 | 5.<br>77<br>70<br>7 | 5.<br>06<br>42<br>1 | 5.<br>5.<br>93<br>1 | 5.<br>52<br>42<br>1 | -1.<br>533<br>424<br>002 | -0.<br>616<br>756<br>667     | 1.5<br>33<br>42<br>40<br>02 | D<br>o<br>w<br>n | 0.0<br>15<br>30<br>45<br>35 | 0.6<br>63<br>32<br>74<br>04 |
| 81<br>57<br>8  | COL<br>21A1        | Collagen, type<br>XXI, $\alpha$ 1                                                    | 4.<br>89<br>86<br>3 | 5.<br>16<br>07<br>1 | 5.<br>39<br>55<br>4 | 7.<br>53<br>23<br>1 | 7.<br>81<br>31<br>2 | 5.<br>19<br>72<br>6 | 3.2<br>398<br>716<br>63  | 1.6<br>959<br>366<br>67      | 3.2<br>39<br>87<br>16<br>63 | U<br>p           | 0.0<br>34<br>97<br>26<br>74 | 0.6<br>63<br>32<br>74<br>04 |
| 30<br>21       | H3F3<br>B          | H3 histone, family<br>3B (H3.3B)                                                     | 7.<br>94<br>91      | 8.<br>01<br>08<br>3 | 8.<br>46<br>86<br>3 | 9.<br>31<br>72<br>3 | 9.<br>47<br>70<br>7 | 8.<br>35<br>00<br>8 | 1.8<br>728<br>993<br>01  | 0.9<br>052<br>733<br>33      | 1.8<br>72<br>89<br>93<br>01 | U<br>p           | 0.0<br>26<br>39<br>53<br>64 | 0.6<br>63<br>32<br>74<br>04 |
| 91<br>36<br>8  | CDK<br>N2AI<br>PNL | CDKN2A<br>interacting protein<br>N-terminal like                                     | 3.<br>77<br>45<br>2 | 4.<br>34<br>56<br>3 | 4.<br>08<br>94<br>4 | 3.<br>42<br>38<br>5 | 3.<br>34<br>90<br>2 | 3.<br>46<br>98<br>9 | -1.<br>575<br>281<br>873 | -0.<br>655<br>61<br>18       | 1.5<br>75<br>28<br>18       | D<br>o<br>w<br>n | 0.0<br>04<br>90<br>15       | 0.6<br>63<br>32<br>74       |

|    |     |                     |    |    |    |    |    |    |     |     |     |    |     |     |    |
|----|-----|---------------------|----|----|----|----|----|----|-----|-----|-----|----|-----|-----|----|
|    |     |                     |    |    |    |    |    |    |     |     |     | 73 |     | 18  | 04 |
| 26 | PCO | Procollagen         | 4. | 5. | 7. | 4. | 4. | 3. | -3. | -1. | 3.5 | D  | 0.0 | 0.6 |    |
| 57 | LCE | C-endopeptidase     | 44 | 97 | 41 | 62 | 19 | 50 | 569 | 835 | 69  | o  | 35  | 63  |    |
| 7  | 2   | enhancer 2          | 39 | 94 | 41 | 89 | 38 | 74 | 569 | 75  | 56  | w  | 13  | 32  |    |
|    |     |                     | 1  | 5  | 8  | 8  | 3  | 8  | 273 |     | 92  | n  | 57  | 74  |    |
|    |     |                     |    |    |    |    |    |    |     |     | 73  |    | 05  | 04  |    |
| 80 | ASR | Asparaginase like 1 | 10 | 10 | 9. | 8. | 9. | 9. | -1. | -0. | 1.7 | D  | 0.0 | 0.6 |    |
| 15 | GL1 |                     | .4 | .1 | 78 | 74 | 36 | 79 | 783 | 834 | 83  | o  | 27  | 63  |    |
| 0  |     |                     | 34 | 93 | 51 | 77 | 72 | 30 | 692 | 866 | 69  | w  | 46  | 32  |    |
|    |     |                     | 42 | 05 | 5  | 8  | 2  | 2  | 183 | 667 | 21  | n  | 61  | 74  |    |
|    |     |                     |    |    |    |    |    |    |     |     | 83  |    | 17  | 04  |    |
| 85 | BAG | B melanoma          | 7. | 7. | 7. | 6. | 6. | 6. | -1. | -0. | 1.5 | D  | 0.0 | 0.6 |    |
| 31 | E2  | antigen family      | 49 | 64 | 07 | 85 | 68 | 88 | 511 | 595 | 11  | o  | 18  | 63  |    |
| 9  |     | member 2            | 63 | 48 | 38 | 24 | 84 | 76 | 010 | 513 | 01  | w  | 43  | 32  |    |
|    |     |                     | 6  | 5  | 5  | 1  | 4  | 7  | 131 | 333 | 01  | n  | 06  | 74  |    |
|    |     |                     |    |    |    |    |    |    |     |     | 31  |    | 8   | 04  |    |
| 52 | CDK | Cyclin-dependent    | 9. | 9. | 8. | 8. | 8. | 8. | -1. | -0. | 1.6 | D  | 0.0 | 0.6 |    |
| 18 | 14  | kinase 14           | 36 | 08 | 87 | 28 | 16 | 64 | 675 | 744 | 75  | o  | 08  | 63  |    |
|    |     |                     | 77 | 95 | 90 | 98 | 74 | 55 | 381 | 49  | 38  | w  | 06  | 32  |    |
|    |     |                     |    | 9  | 4  | 4  | 8  | 4  | 909 |     | 19  | n  | 07  | 74  |    |
|    |     |                     |    |    |    |    |    |    |     |     | 09  |    | 69  | 04  |    |
| 19 | EDN | Endothelin          | 3. | 4. | 4. | 5. | 6. | 5. | 3.0 | 1.6 | 3.0 | U  | 0.0 | 0.6 |    |
| 10 | RB  | receptor type B     | 51 | 52 | 24 | 06 | 67 | 36 | 460 | 069 | 46  | p  | 09  | 63  |    |
|    |     |                     | 95 | 78 | 47 | 59 | 79 | 90 | 507 | 4   | 05  |    | 52  | 32  |    |
|    |     |                     | 8  | 3  |    | 3  | 6  | 4  | 95  |     | 07  |    | 87  | 74  |    |
|    |     |                     |    |    |    |    |    |    |     |     | 95  |    | 55  | 04  |    |
| 25 | ACK | Atypical            | 6. | 6. | 6. | 8. | 8. | 6. | 2.1 | 1.1 | 2.1 | U  | 0.0 | 0.6 |    |
| 32 | R1  | chemokine           | 23 | 66 | 82 | 11 | 18 | 73 | 465 | 020 | 46  | p  | 29  | 63  |    |
|    |     | receptor 1 (Duffy   | 75 | 62 | 68 | 06 | 79 | 82 | 900 | 466 | 59  |    | 40  | 32  |    |

|    |      |                     |    |    |    |    |    |    |     |     |     |   |     |     |
|----|------|---------------------|----|----|----|----|----|----|-----|-----|-----|---|-----|-----|
|    |      | blood group)        | 7  | 3  | 8  | 1  | 3  | 8  | 07  | 67  | 00  |   | 21  | 74  |
|    |      |                     |    |    |    |    |    |    |     |     | 07  |   | 02  | 04  |
| 16 | ZNF  | Zinc finger protein | 4. | 4. | 4. | 3. | 3. | 3. | -1. | -0. | 1.6 | D | 0.0 | 0.6 |
| 32 | 540  | 540                 | 66 | 67 | 41 | 80 | 70 | 99 | 673 | 743 | 73  | o | 01  | 63  |
| 55 |      |                     | 09 | 31 | 05 | 84 | 81 | 80 | 985 | 286 | 98  | w | 28  | 32  |
|    |      |                     | 2  | 4  | 1  | 7  | 7  | 7  | 077 | 667 | 50  | n | 73  | 74  |
|    |      |                     |    |    |    |    |    |    |     |     | 77  |   | 43  | 04  |
| 55 | BEX  | Brain expressed     | 6. | 6. | 6. | 6. | 7. | 7. | 1.7 | 0.8 | 1.7 | U | 0.0 | 0.6 |
| 85 | 1    | X-linked 1          | 24 | 74 | 30 | 67 | 64 | 40 | 507 | 079 | 50  | p | 25  | 63  |
| 9  |      |                     | 40 | 98 | 71 | 49 | 58 | 40 | 017 | 333 | 70  |   | 86  | 32  |
|    |      |                     | 5  | 7  | 5  | 2  | 7  | 8  | 58  | 33  | 17  |   | 62  | 74  |
|    |      |                     |    |    |    |    |    |    |     |     | 58  |   | 73  | 04  |
| 38 | CEP8 | Centrosomal         | 5. | 6. | 6. | 7. | 6. | 6. | 1.8 | 0.8 | 1.8 | U | 0.0 | 0.6 |
| 71 | 5L   | protein 85kda-like  | 65 | 16 | 07 | 14 | 73 | 58 | 096 | 557 | 09  | p | 06  | 63  |
| 19 |      |                     | 14 | 93 | 85 | 26 | 42 | 95 | 365 |     | 63  |   | 30  | 32  |
|    |      |                     | 4  | 6  |    | 3  | 3  | 4  | 83  |     | 65  |   | 67  | 74  |
|    |      |                     |    |    |    |    |    |    |     |     | 83  |   | 32  | 04  |
| 13 | HIN  | Histidine triad     | 7. | 6. | 6. | 5. | 5. | 6. | -1. | -0. | 1.6 | D | 0.0 | 0.6 |
| 51 | T3   | nucleotide binding  | 24 | 47 | 28 | 85 | 97 | 07 | 625 | 701 | 25  | o | 33  | 63  |
| 14 |      | protein 3           | 97 | 52 | 88 | 94 | 28 | 75 | 969 | 3   | 96  | w | 70  | 32  |
|    |      |                     | 5  | 3  | 6  | 9  | 7  | 8  | 28  |     | 92  | n | 71  | 74  |
|    |      |                     |    |    |    |    |    |    |     |     | 8   |   | 37  | 04  |
| 80 | ACA  | Acyl-coa            | 7. | 7. | 7. | 6. | 6. | 7. | -1. | -0. | 1.5 | D | 0.0 | 0.6 |
| 72 | D10  | dehydrogenase       | 26 | 27 | 19 | 38 | 38 | 19 | 503 | 588 | 03  | o | 48  | 63  |
| 4  |      | family member 10    | 27 | 27 | 89 | 85 | 29 | 67 | 901 | 71  | 90  | w | 88  | 32  |
|    |      |                     | 3  | 5  | 2  | 6  | 6  | 5  | 418 |     | 14  | n | 66  | 74  |
|    |      |                     |    |    |    |    |    |    |     |     | 18  |   | 71  | 04  |
| 99 | CLE  | C-type lectin       | 6. | 6. | 7. | 8. | 7. | 7. | 2.0 | 1.0 | 2.0 | U | 0.0 | 0.6 |
| 76 | C2B  | domain family 2,    | 15 | 55 | 34 | 06 | 84 | 15 | 083 | 059 | 08  | p | 27  | 63  |



|          |             |                                                                                    |                     |                     |                     |                     |                      |                     |                          |                          |                             |                  |                             |                             |
|----------|-------------|------------------------------------------------------------------------------------|---------------------|---------------------|---------------------|---------------------|----------------------|---------------------|--------------------------|--------------------------|-----------------------------|------------------|-----------------------------|-----------------------------|
|          |             | member B                                                                           | 66<br>4             | 89<br>4             | 07<br>5             | 72<br>7             | 70<br>6              | 99<br>6             | 165<br>26                | 866<br>67                | 31<br>65<br>26              |                  | 12<br>87<br>45              | 32<br>74<br>04              |
| 52<br>38 | PGM<br>3    | Phosphoglucomutase 3                                                               | 6.<br>44<br>11<br>6 | 6.<br>35<br>41<br>2 | 6.<br>64<br>99<br>2 | 5.<br>51<br>33<br>4 | 5.<br>67<br>31<br>6  | 5.<br>74<br>72<br>6 | -1.<br>786<br>513<br>315 | -0.<br>837<br>146<br>667 | 1.7<br>86<br>51<br>33<br>15 | D<br>o<br>w<br>n | 0.0<br>01<br>29<br>25<br>1  | 0.6<br>63<br>32<br>74<br>04 |
| 67<br>23 | SRM         | Spermidine synthase                                                                | 6.<br>70<br>41<br>1 | 7.<br>17<br>90<br>8 | 7.<br>43<br>02<br>8 | 8.<br>33<br>59<br>7 | 8.<br>19<br>68<br>7  | 7.<br>35<br>35<br>9 | 1.8<br>120<br>590<br>88  | 0.8<br>576<br>3<br>88    | 1.8<br>12<br>05<br>90<br>88 | U<br>p           | 0.0<br>29<br>21<br>56<br>83 | 0.6<br>63<br>32<br>74<br>04 |
| 66<br>41 | SNT<br>B1   | Syntrophin, $\beta$ 1 (dystrophin-associated protein A1, 59kda, basic component 1) | 4.<br>69<br>47<br>4 | 4.<br>73<br>66<br>6 | 4.<br>75<br>48<br>6 | 6.<br>63<br>58<br>8 | 5.<br>98<br>74<br>3  | 4.<br>85<br>18<br>1 | 2.1<br>380<br>367<br>73  | 1.0<br>962<br>866<br>67  | 2.1<br>38<br>03<br>67<br>73 | U<br>p           | 0.0<br>33<br>45<br>68<br>14 | 0.6<br>63<br>32<br>74<br>04 |
| 59<br>97 | RGS<br>2    | Regulator of G-protein signaling 2                                                 | 8.<br>21<br>32<br>4 | 8.<br>93<br>12<br>8 | 8.<br>24<br>07<br>6 | 9.<br>80<br>09<br>6 | 10.<br>3<br>19<br>01 | 9.<br>69<br>06<br>3 | 2.7<br>800<br>805<br>16  | 1.4<br>751<br>266<br>67  | 2.7<br>80<br>08<br>05<br>16 | U<br>p           | 0.0<br>00<br>86<br>07<br>06 | 0.6<br>63<br>32<br>74<br>04 |
| 13<br>05 | COL<br>13A1 | Collagen, type XIII, $\alpha$ 1                                                    | 4.<br>44<br>01<br>8 | 5.<br>78<br>49<br>8 | 4.<br>57<br>51<br>8 | 6.<br>43<br>82<br>9 | 7.<br>10<br>27<br>4  | 5.<br>20<br>94<br>6 | 2.4<br>909<br>855<br>74  | 1.3<br>167<br>166<br>67  | 2.4<br>90<br>98<br>55<br>74 | U<br>p           | 0.0<br>46<br>59<br>10<br>91 | 0.6<br>63<br>32<br>74<br>04 |
| 46       | NAC         | Nascent                                                                            | 8.                  | 8.                  | 9.                  | 10                  | 9.                   | 9.                  | 1.9                      | 0.9                      | 1.9                         | U                | 0.0                         | 0.6                         |

|               |            |                                                 |                     |                     |                     |                     |                     |                      |                          |                         |                             |                  |                             |                             |
|---------------|------------|-------------------------------------------------|---------------------|---------------------|---------------------|---------------------|---------------------|----------------------|--------------------------|-------------------------|-----------------------------|------------------|-----------------------------|-----------------------------|
| 66            | A          | polypeptide-associated complex $\alpha$ subunit | 77<br>52<br>7       | 63<br>37<br>5       | 42<br>70<br>1       | .3<br>54<br>19      | 72<br>28<br>8       | 75<br>16<br>1        | 966<br>064<br>61         | 975<br>5<br>64          | 96<br>60<br>64<br>61        | p                | 08<br>48<br>83<br>5         | 63<br>32<br>74<br>04        |
| 10<br>33<br>5 | MRV<br>I1  | Murine retrovirus integration site 1 homolog    | 3.<br>29<br>80<br>8 | 4.<br>42<br>55<br>1 | 3.<br>53<br>28<br>9 | 5.<br>84<br>41<br>1 | 3.<br>95<br>12<br>2 | 5.<br>05<br>04<br>3  | 2.2<br>917<br>134<br>53  | 1.1<br>964<br>266<br>67 | 2.2<br>91<br>71<br>34<br>53 | U<br>p           | 0.0<br>48<br>63<br>79<br>71 | 0.6<br>63<br>32<br>74<br>04 |
| 51<br>06<br>2 | ATL1       | Atlastin gtpase 1                               | 3.<br>95<br>28      | 4.<br>59<br>06<br>2 | 4.<br>23<br>12<br>4 | 5.<br>28<br>69<br>1 | 5.<br>08<br>30<br>8 | 4.<br>45<br>39<br>6  | 1.6<br>055<br>823<br>55  | 0.6<br>830<br>966<br>67 | 1.6<br>05<br>58<br>23<br>55 | U<br>p           | 0.0<br>36<br>00<br>86<br>41 | 0.6<br>63<br>32<br>74<br>04 |
| 23<br>32<br>8 | SAS<br>H1  | SAM and SH3 domain containing 1                 | 5.<br>98<br>68<br>7 | 6.<br>67<br>24<br>6 | 7.<br>09<br>24<br>6 | 7.<br>86<br>89<br>3 | 7.<br>86<br>74<br>5 | 6.<br>85<br>55<br>5  | 1.9<br>274<br>810<br>37  | 0.9<br>467<br>166<br>67 | 1.9<br>27<br>48<br>10<br>37 | U<br>p           | 0.0<br>40<br>93<br>48<br>99 | 0.6<br>63<br>32<br>74<br>04 |
| 34<br>86      | IGFB<br>P3 | Insulin like growth factor binding protein 3    | 3.<br>90<br>06<br>7 | 5.<br>95<br>24<br>3 | 5.<br>01<br>92<br>6 | 7.<br>80<br>75<br>1 | 6.<br>77<br>00<br>1 | 5.<br>66<br>48<br>65 | 3.4<br>581<br>169<br>65  | 1.7<br>899<br>866<br>67 | 3.4<br>58<br>11<br>69<br>65 | U<br>p           | 0.0<br>30<br>35<br>93<br>44 | 0.6<br>63<br>32<br>74<br>04 |
| 64<br>06<br>5 | PER<br>P   | PERP, TP53 apoptosis effector                   | 6.<br>15<br>66<br>9 | 6.<br>60<br>06<br>4 | 6.<br>11<br>13<br>8 | 5.<br>25<br>43<br>5 | 5.<br>98<br>54<br>5 | 5.<br>29<br>47<br>9  | -1.<br>714<br>799<br>617 | -0.<br>778<br>04<br>96  | 1.7<br>14<br>79<br>96<br>17 | D<br>o<br>w<br>n | 0.0<br>18<br>46<br>80<br>07 | 0.6<br>63<br>32<br>74<br>04 |

|                |            |                                                      |                     |                     |                     |                     |                     |                     |                          |                             |                             |                  |                             |                             |
|----------------|------------|------------------------------------------------------|---------------------|---------------------|---------------------|---------------------|---------------------|---------------------|--------------------------|-----------------------------|-----------------------------|------------------|-----------------------------|-----------------------------|
| 10<br>87<br>5  | FGL<br>2   | Fibrinogen-like 2                                    | 7.<br>09<br>79<br>4 | 7.<br>41<br>82<br>1 | 7.<br>29<br>65      | 8.<br>44<br>17<br>5 | 8.<br>02<br>94      | 7.<br>99<br>58<br>3 | 1.8<br>464<br>787<br>59  | 0.8<br>847<br>766<br>67     | 1.8<br>46<br>47<br>87<br>59 | U<br>p           | 0.0<br>02<br>22<br>25<br>6  | 0.6<br>63<br>32<br>74<br>04 |
| 10<br>78<br>1  | ZNF<br>266 | Zinc finger protein<br>266                           | 8.<br>28<br>07<br>1 | 8.<br>28<br>42<br>6 | 8.<br>21<br>35<br>8 | 7.<br>63<br>26<br>2 | 7.<br>48<br>16      | 7.<br>63<br>81<br>5 | -1.<br>597<br>032<br>125 | -0.<br>675<br>393<br>333    | 1.5<br>97<br>03<br>21<br>25 | D<br>o<br>w<br>n | 0.0<br>02<br>17<br>60<br>02 | 0.6<br>63<br>32<br>74<br>04 |
| 54<br>52<br>1  | WDR<br>44  | WD repeat domain<br>44                               | 7.<br>17<br>79<br>7 | 6.<br>81<br>55<br>5 | 6.<br>74<br>40<br>8 | 5.<br>61<br>28<br>2 | 6.<br>29<br>58<br>4 | 6.<br>65<br>30<br>4 | -1.<br>653<br>244<br>383 | -0.<br>725<br>3<br>43<br>83 | 1.6<br>53<br>24<br>43<br>83 | D<br>o<br>w<br>n | 0.0<br>39<br>67<br>22<br>15 | 0.6<br>63<br>32<br>74<br>04 |
| 14<br>05<br>97 | TCE<br>AL2 | Transcription<br>elongation factor A<br>(SII)-like 2 | 4.<br>23<br>57<br>1 | 7.<br>65<br>62<br>5 | 5.<br>07<br>48<br>7 | 8.<br>03<br>01<br>1 | 7.<br>42<br>62<br>7 | 7.<br>25<br>35<br>9 | 3.7<br>695<br>178<br>41  | 1.9<br>143<br>8<br>78<br>41 | 3.7<br>69<br>51<br>78<br>41 | U<br>p           | 0.0<br>49<br>90<br>38<br>23 | 0.6<br>63<br>32<br>74<br>04 |
| 13<br>08<br>88 | FBX<br>O36 | F-box protein 36                                     | 4.<br>05<br>18<br>8 | 3.<br>81<br>87<br>7 | 3.<br>88<br>9       | 3.<br>39<br>12<br>2 | 3.<br>39<br>26<br>8 | 3.<br>18<br>00<br>3 | -1.<br>514<br>218<br>43  | -0.<br>598<br>573<br>333    | 1.5<br>14<br>21<br>84<br>3  | D<br>o<br>w<br>n | 0.0<br>01<br>78<br>58<br>74 | 0.6<br>63<br>32<br>74<br>04 |
| 54<br>97<br>0  | TTC<br>12  | Tetratricopeptide<br>repeat domain 12                | 6.<br>89<br>08<br>1 | 7.<br>12<br>08<br>4 | 6.<br>77<br>94<br>3 | 5.<br>73<br>88<br>1 | 6.<br>51<br>96<br>3 | 6.<br>39<br>57<br>7 | -1.<br>638<br>402<br>702 | -0.<br>712<br>29            | 1.6<br>38<br>40<br>27       | D<br>o<br>w<br>n | 0.0<br>21<br>58<br>42       | 0.6<br>63<br>32<br>74       |



|    |      |                         |    |    |    |    |    |    |     |     |     |   |     |     |
|----|------|-------------------------|----|----|----|----|----|----|-----|-----|-----|---|-----|-----|
| 28 | IGK  | Immunoglobulin $\kappa$ | 5. | 5. | 4. | 6. | 9. | 8. | 7.8 | 2.9 | 7.8 | U | 0.0 | 0.6 |
| 93 | V1-3 | variable 1-39           | 10 | 31 | 80 | 05 | 17 | 94 | 924 | 804 | 92  | p | 06  | 63  |
| 0  | 9    | (gene/pseudogene)       | 81 | 25 | 69 | 00 | 36 | 53 | 871 | 8   | 48  |   | 50  | 32  |
|    |      |                         | 6  | 7  | 8  | 9  | 8  | 8  | 14  |     | 71  |   | 31  | 74  |
|    |      |                         |    |    |    |    |    |    |     |     | 14  |   | 33  | 04  |
| 93 | TCE  | Transcription           | 7. | 7. | 7. | 9. | 7. | 7. | 1.8 | 0.8 | 1.8 | U | 0.0 | 0.6 |
| 38 | AL1  | elongation factor A     | 40 | 50 | 45 | 16 | 93 | 87 | 291 | 711 | 29  | p | 40  | 63  |
|    |      | (SII)-like 1            | 33 | 75 | 19 | 90 | 41 | 32 | 710 | 9   | 17  |   | 64  | 32  |
|    |      |                         | 9  | 2  | 2  | 4  | 3  | 3  | 61  |     | 10  |   | 09  | 74  |
|    |      |                         |    |    |    |    |    |    |     |     | 61  |   | 92  | 04  |
| 69 | TCF2 | Transcription           | 3. | 5. | 4. | 6. | 6. | 5. | 3.6 | 1.8 | 3.6 | U | 0.0 | 0.6 |
| 43 | 1    | factor 21               | 63 | 03 | 41 | 34 | 67 | 68 | 725 | 767 | 72  | p | 02  | 63  |
|    |      |                         | 03 | 17 | 21 | 30 | 43 | 70 | 530 | 833 | 55  |   | 19  | 32  |
|    |      |                         | 4  | 4  | 2  | 8  | 8  | 9  | 57  | 33  | 30  |   | 13  | 74  |
|    |      |                         |    |    |    |    |    |    |     |     | 57  |   | 9   | 04  |
| 24 | FJX1 | Four jointed box 1      | 3. | 4. | 4. | 6. | 5. | 5. | 2.9 | 1.5 | 2.9 | U | 0.0 | 0.6 |
| 14 |      |                         | 75 | 95 | 17 | 62 | 54 | 33 | 054 | 387 | 05  | p | 08  | 63  |
| 7  |      |                         | 30 | 96 | 62 | 65 | 25 | 62 | 198 | 466 | 41  |   | 31  | 32  |
|    |      |                         | 6  | 5  | 9  | 1  | 2  | 1  | 71  | 67  | 98  |   | 95  | 74  |
|    |      |                         |    |    |    |    |    |    |     |     | 71  |   | 18  | 04  |
| 18 | DPP4 | Dipeptidyl-peptida      | 9. | 9. | 9. | 5. | 7. | 9. | -3. | -1. | 3.9 | D | 0.0 | 0.6 |
| 03 |      | se 4                    | 75 | 15 | 70 | 95 | 42 | 27 | 964 | 987 | 64  | o | 33  | 63  |
|    |      |                         | 27 | 55 | 49 | 06 | 92 | 17 | 741 | 226 | 74  | w | 26  | 32  |
|    |      |                         | 8  | 8  | 4  | 3  | 1  | 8  | 118 | 667 | 111 | n | 96  | 74  |
|    |      |                         |    |    |    |    |    |    |     |     | 8   |   | 88  | 04  |
| 10 | LOC  | Uncharacterized         | 7. | 6. | 6. | 5. | 5. | 6. | -1. | -0. | 1.9 | D | 0.0 | 0.6 |
| 53 | 1053 | protein c21orf124       | 17 | 70 | 53 | 03 | 71 | 69 | 986 | 990 | 86  | o | 48  | 63  |
| 72 | 7282 |                         | 23 | 08 | 35 | 14 | 14 | 26 | 676 | 356 | 67  | w | 63  | 32  |
| 82 | 4    |                         |    | 3  |    | 7  | 1  | 8  | 081 | 667 | 60  | n | 47  | 74  |

|    |      |                    |    |    |    |    |    |    |     |     |     |   |     |     |
|----|------|--------------------|----|----|----|----|----|----|-----|-----|-----|---|-----|-----|
| 4  |      |                    |    |    |    |    |    |    |     |     | 81  |   | 28  | 04  |
| 55 | PPP1 | Protein            | 6. | 6. | 6. | 5. | 6. | 6. | -1. | -0. | 1.6 | D | 0.0 | 0.6 |
| 60 | R9A  | phosphatase 1,     | 61 | 70 | 46 | 49 | 06 | 07 | 642 | 716 | 42  | o | 11  | 63  |
| 7  |      | regulatory subunit | 37 | 92 | 05 | 06 | 90 | 53 | 833 | 186 | 83  | w | 01  | 32  |
|    |      | 9A                 | 2  | 7  | 9  | 2  | 1  | 9  | 95  | 667 | 39  | n | 47  | 74  |
|    |      |                    |    |    |    |    |    |    |     |     | 5   |   | 69  | 04  |
| 46 | MYO  | Myosin VA          | 4. | 4. | 4. | 5. | 5. | 4. | 1.7 | 0.8 | 1.7 | U | 0.0 | 0.6 |
| 44 | 5A   |                    | 06 | 90 | 59 | 91 | 28 | 79 | 531 | 099 | 53  | p | 45  | 63  |
|    |      |                    | 20 | 76 | 96 | 86 | 16 | 89 | 992 | 9   | 19  |   | 13  | 32  |
|    |      |                    | 5  | 6  | 3  | 4  | 9  | 8  | 9   |     | 92  |   | 67  | 74  |
|    |      |                    |    |    |    |    |    |    |     |     | 9   |   | 66  | 04  |
| 91 | SLF  | Schlafen family    | 3. | 4. | 4. | 5. | 5. | 4. | 1.9 | 0.9 | 1.9 | U | 0.0 | 0.6 |
| 60 | N11  | member 11          | 39 | 16 | 43 | 35 | 00 | 58 | 742 | 812 | 74  | p | 16  | 63  |
| 7  |      |                    | 65 | 61 | 77 | 07 | 93 | 42 | 070 | 733 | 20  |   | 22  | 32  |
|    |      |                    | 5  | 7  | 9  |    | 7  | 6  | 9   | 33  | 70  |   | 05  | 74  |
|    |      |                    |    |    |    |    |    |    |     |     | 9   |   | 11  | 04  |
| 94 | SH3  | SH3-domain         | 6. | 8. | 7. | 8. | 8. | 7. | 1.7 | 0.7 | 1.7 | U | 0.0 | 0.6 |
| 67 | BP5  | binding protein 5  | 73 | 01 | 34 | 01 | 49 | 99 | 407 | 997 | 40  | p | 48  | 63  |
|    |      | (BTK-associated)   | 08 | 66 | 85 | 40 | 08 | 03 | 632 | 2   | 76  |   | 61  | 32  |
|    |      |                    | 9  | 5  | 5  | 8  | 6  | 1  | 44  |     | 32  |   | 96  | 74  |
|    |      |                    |    |    |    |    |    |    |     |     | 44  |   | 44  | 04  |
| 90 | CH2  | Cholesterol        | 5. | 5. | 4. | 7. | 6. | 5. | 2.7 | 1.4 | 2.7 | U | 0.0 | 0.6 |
| 23 | 5H   | 25-hydroxylase     | 50 | 08 | 89 | 16 | 80 | 90 | 642 | 669 | 64  | p | 03  | 63  |
|    |      |                    | 91 | 18 | 21 | 91 | 68 | 77 | 791 | 033 | 27  |   | 69  | 32  |
|    |      |                    |    | 8  | 3  | 8  | 6  | 8  | 88  | 33  | 91  |   | 44  | 74  |
|    |      |                    |    |    |    |    |    |    |     |     | 88  |   | 07  | 04  |
| 10 | PNM  | Paraneoplastic Ma  | 3. | 4. | 4. | 5. | 4. | 4. | 1.9 | 0.9 | 1.9 | U | 0.0 | 0.6 |
| 68 | A2   | antigen 2          | 39 | 26 | 45 | 76 | 94 | 34 | 733 | 806 | 73  | p | 49  | 63  |
| 7  |      |                    | 12 | 68 | 12 | 22 | 4  | 51 | 998 | 833 | 39  |   | 54  | 32  |

|                |             |                                                                      |                      |                      |                      |                      |                      |                      |                          |                          |                             |                  |                             |                             |
|----------------|-------------|----------------------------------------------------------------------|----------------------|----------------------|----------------------|----------------------|----------------------|----------------------|--------------------------|--------------------------|-----------------------------|------------------|-----------------------------|-----------------------------|
|                |             |                                                                      | 2                    | 1                    | 7                    | 3                    |                      | 2                    | 9                        | 33                       | 98                          |                  | 33                          | 74                          |
|                |             |                                                                      |                      |                      |                      |                      |                      |                      |                          |                          | 9                           |                  | 1                           | 04                          |
| 60             | ACT<br>B    | Actin, $\beta$                                                       | 11<br>.1<br>29<br>72 | 10<br>.4<br>02<br>18 | 10<br>.6<br>87<br>43 | 11<br>.8<br>97<br>93 | 10<br>.9<br>61<br>82 | 11<br>.7<br>68<br>29 | 1.7<br>446<br>085<br>11  | 0.8<br>029<br>033<br>33  | 1.7<br>44<br>60<br>85<br>11 | U<br>p           | 0.0<br>32<br>22<br>49<br>6  | 0.6<br>63<br>32<br>74<br>04 |
| 51<br>17<br>6  | LEF1        | Lymphoid<br>enhancer-binding<br>factor 1                             | 4.<br>06<br>62<br>6  | 4.<br>42<br>68<br>3  | 3.<br>71<br>45       | 6.<br>48<br>80<br>5  | 6.<br>58<br>79<br>3  | 4.<br>41<br>68<br>7  | 3.3<br>911<br>000<br>11  | 1.7<br>617<br>533<br>33  | 3.3<br>91<br>10<br>00<br>11 | U<br>p           | 0.0<br>17<br>61<br>98<br>53 | 0.6<br>63<br>32<br>74<br>04 |
| 28<br>62<br>62 | TPR<br>N    | Taperin                                                              | 7.<br>49<br>82<br>1  | 7.<br>25<br>86<br>9  | 6.<br>66<br>79       | 5.<br>75<br>37<br>5  | 6.<br>11<br>14<br>1  | 6.<br>75<br>18<br>3  | -1.<br>913<br>132<br>329 | -0.<br>935<br>936<br>667 | 1.9<br>13<br>13<br>23<br>29 | D<br>o<br>w<br>n | 0.0<br>22<br>26<br>56<br>64 | 0.6<br>63<br>32<br>74<br>04 |
| 40<br>6        | ARN<br>TL   | Aryl hydrocarbon<br>receptor nuclear<br>translocator like            | 5.<br>08<br>6        | 5.<br>89<br>27<br>6  | 4.<br>64<br>06       | 7.<br>00<br>76       | 7.<br>14<br>38<br>9  | 5.<br>39<br>62<br>6  | 2.4<br>784<br>932<br>56  | 1.3<br>094<br>633<br>33  | 2.4<br>78<br>49<br>32<br>56 | U<br>p           | 0.0<br>41<br>14<br>97<br>37 | 0.6<br>63<br>32<br>74<br>04 |
| 84<br>34       | REC<br>K    | Reversion-inducing<br>-cysteine-rich<br>protein with kazal<br>motifs | 4.<br>75<br>63       | 5.<br>43<br>42<br>9  | 5.<br>98<br>04       | 7.<br>41<br>56<br>6  | 6.<br>86<br>43<br>1  | 5.<br>88<br>06<br>4  | 2.5<br>137<br>827<br>98  | 1.3<br>298<br>6<br>98    | 2.5<br>13<br>78<br>27<br>98 | U<br>p           | 0.0<br>21<br>89<br>07<br>44 | 0.6<br>63<br>32<br>74<br>04 |
| 55<br>11       | PLE<br>KHJ1 | Pleckstrin<br>homology domain                                        | 9.<br>86             | 9.<br>74             | 9.<br>54             | 8.<br>96             | 8.<br>87             | 9.<br>51             | -1.<br>516               | -0.<br>600               | 1.5<br>16                   | D<br>o           | 0.0<br>26                   | 0.6<br>63                   |

|               |           |                                                       |                     |                     |                     |                     |                     |                     |                          |                          |                             |                  |                             |                             |
|---------------|-----------|-------------------------------------------------------|---------------------|---------------------|---------------------|---------------------|---------------------|---------------------|--------------------------|--------------------------|-----------------------------|------------------|-----------------------------|-----------------------------|
| 1             |           | containing J1                                         | 64<br>4             | 77<br>8             | 33<br>1             | 70<br>1             | 18                  | 62<br>4             | 585<br>324               | 826<br>667               | 58<br>53<br>24              | w<br>n           | 26<br>17<br>01              | 32<br>74<br>04              |
| 22<br>80<br>8 | MRA<br>S  | Muscle RAS<br>oncogene homolog                        | 5.<br>13<br>36      | 6.<br>37<br>35<br>6 | 5.<br>27<br>75<br>3 | 7.<br>81<br>44<br>1 | 6.<br>95<br>68      | 5.<br>86<br>03<br>3 | 2.4<br>322<br>361<br>9   | 1.2<br>822<br>833<br>33  | 2.4<br>32<br>23<br>61<br>9  | U<br>p           | 0.0<br>48<br>47<br>99<br>06 | 0.6<br>63<br>32<br>74<br>04 |
| 91<br>89      | ZBE<br>D1 | Zinc finger,<br>BED-type<br>containing 1              | 10<br>.1<br>95      | 9.<br>66<br>7       | 9.<br>95<br>16<br>6 | 9.<br>15<br>81<br>2 | 8.<br>77<br>83<br>9 | 9.<br>79<br>11<br>2 | -1.<br>619<br>269<br>742 | -0.<br>695<br>343<br>333 | 1.6<br>19<br>26<br>97<br>42 | D<br>o<br>w<br>n | 0.0<br>44<br>18<br>4        | 0.6<br>63<br>32<br>74<br>04 |
| 54<br>86<br>3 | TOR<br>4A | Torsin family 4,<br>member A                          | 8.<br>37<br>77<br>6 | 7.<br>58<br>56<br>8 | 7.<br>83<br>67<br>3 | 6.<br>49<br>33<br>7 | 7.<br>28<br>54<br>5 | 7.<br>32<br>31<br>7 | -1.<br>865<br>281<br>45  | -0.<br>899<br>393<br>333 | 1.8<br>65<br>28<br>14<br>5  | D<br>o<br>w<br>n | 0.0<br>20<br>86<br>17<br>74 | 0.6<br>63<br>32<br>74<br>04 |
| 80<br>16<br>9 | CTC<br>1  | CTS telomere<br>maintenance<br>complex<br>component 1 | 7.<br>06<br>74<br>5 | 6.<br>81<br>60<br>6 | 6.<br>70<br>37<br>9 | 5.<br>96<br>14<br>7 | 6.<br>22<br>93<br>3 | 6.<br>43<br>40<br>2 | -1.<br>573<br>699<br>41  | -0.<br>654<br>16<br>41   | 1.5<br>73<br>69<br>94<br>1  | D<br>o<br>w<br>n | 0.0<br>111<br>23<br>50<br>5 | 0.6<br>63<br>32<br>74<br>04 |
| 57<br>27      | PTC<br>H1 | Patched 1                                             | 6.<br>73<br>63<br>3 | 7.<br>88<br>03<br>8 | 7.<br>40<br>34<br>8 | 9.<br>66<br>09<br>2 | 8.<br>65<br>18<br>7 | 8.<br>50<br>65<br>9 | 3.0<br>309<br>218<br>77  | 1.5<br>997<br>566<br>67  | 3.0<br>30<br>92<br>18<br>77 | U<br>p           | 0.0<br>04<br>89<br>72<br>67 | 0.6<br>63<br>32<br>74<br>04 |
| 98            | ZNF       | Zinc finger protein                                   | 4.                  | 4.                  | 3.                  | 3.                  | 3.                  | 4.                  | -1.                      | -0.                      | 1.5                         | D                | 0.0                         | 0.6                         |



|               |            |                                                      |                      |                      |                      |                      |                      |                      |                          |                              |                             |                  |                             |                             |
|---------------|------------|------------------------------------------------------|----------------------|----------------------|----------------------|----------------------|----------------------|----------------------|--------------------------|------------------------------|-----------------------------|------------------|-----------------------------|-----------------------------|
| 49            | 518A       | 518A                                                 | 63<br>89<br>9        | 30<br>91<br>9        | 91<br>57<br>9        | 68<br>53<br>5        | 15<br>32<br>4        | 03<br>40<br>3        | 584<br>198<br>738        | 663<br>753<br>333            | 84<br>19<br>87<br>38        | o<br>w<br>n      | 44<br>06<br>78<br>21        | 63<br>32<br>74<br>04        |
| 79<br>92<br>5 | SPEF<br>2  | Sperm flagellar 2                                    | 2.<br>66<br>68<br>2  | 3.<br>30<br>79<br>5  | 3.<br>38<br>47<br>5  | 3.<br>89<br>21<br>1  | 3.<br>86<br>96<br>3  | 3.<br>46<br>69<br>41 | 1.5<br>401<br>348<br>41  | 0.6<br>230<br>566<br>67      | 1.5<br>40<br>13<br>48<br>41 | U<br>p           | 0.0<br>26<br>02<br>21<br>31 | 0.6<br>63<br>32<br>74<br>04 |
| 61<br>42      | RPL1<br>8A | Ribosomal protein<br>118a                            | 11<br>.4<br>76<br>01 | 11<br>.3<br>86<br>18 | 11<br>.8<br>54<br>99 | 12<br>.6<br>58<br>25 | 12<br>.0<br>31<br>64 | 11<br>.8<br>20<br>01 | 1.5<br>131<br>692<br>18  | 0.5<br>975<br>733<br>33      | 1.5<br>13<br>16<br>92<br>18 | U<br>p           | 0.0<br>49<br>63<br>14<br>06 | 0.6<br>63<br>32<br>74<br>04 |
| 85<br>01<br>2 | TCE<br>AL3 | Transcription<br>elongation factor A<br>(SII)-like 3 | 8.<br>11<br>85       | 8.<br>72<br>42<br>3  | 8.<br>32<br>78       | 9.<br>84<br>90<br>5  | 8.<br>88<br>98<br>8  | 8.<br>76<br>18<br>2  | 1.7<br>132<br>551<br>22  | 0.7<br>767<br>4<br>22        | 1.7<br>13<br>25<br>51<br>22 | U<br>p           | 0.0<br>46<br>30<br>35<br>16 | 0.6<br>63<br>32<br>74<br>04 |
| 74<br>24      | VEG<br>FC  | Vascular<br>endothelial growth<br>factor C           | 4.<br>00<br>81<br>9  | 6.<br>00<br>90<br>4  | 5.<br>28<br>10<br>4  | 7.<br>76<br>26<br>2  | 6.<br>78<br>02<br>4  | 6.<br>22<br>94<br>64 | 3.5<br>422<br>433<br>64  | 1.8<br>246<br>633<br>33      | 3.5<br>42<br>24<br>33<br>64 | U<br>p           | 0.0<br>15<br>40<br>60<br>99 | 0.6<br>63<br>32<br>74<br>04 |
| 74<br>33      | VIPR<br>1  | Vasoactive<br>intestinal peptide<br>receptor 1       | 8.<br>96<br>53<br>3  | 8.<br>73<br>12<br>2  | 9.<br>52<br>55<br>2  | 6.<br>59<br>35<br>1  | 6.<br>96<br>57<br>9  | 8.<br>47<br>08<br>8  | -3.<br>318<br>727<br>098 | -1.<br>730<br>63<br>70<br>98 | 3.3<br>18<br>72<br>70<br>98 | D<br>o<br>w<br>n | 0.0<br>09<br>36<br>17<br>42 | 0.6<br>63<br>32<br>74<br>04 |

|                |             |                                                                                       |                     |                     |                     |                     |                     |                      |                         |                               |                             |        |                             |                             |
|----------------|-------------|---------------------------------------------------------------------------------------|---------------------|---------------------|---------------------|---------------------|---------------------|----------------------|-------------------------|-------------------------------|-----------------------------|--------|-----------------------------|-----------------------------|
| 56<br>21       | PRN<br>P    | Prion protein                                                                         | 5.<br>87<br>68<br>2 | 5.<br>03<br>59<br>9 | 5.<br>72<br>04<br>3 | 6.<br>77<br>58<br>1 | 6.<br>16<br>69<br>7 | 6.<br>53<br>28<br>19 | 1.9<br>284<br>833<br>19 | 0.9<br>474<br>666<br>67       | 1.9<br>28<br>48<br>33<br>19 | U<br>p | 0.0<br>10<br>52<br>09<br>85 | 0.6<br>63<br>32<br>74<br>04 |
| 23<br>70<br>4  | KCN<br>E4   | Potassium channel,<br>voltage gated<br>subfamily E<br>regulatory $\beta$<br>subunit 4 | 3.<br>61<br>32<br>7 | 5.<br>18<br>08<br>2 | 3.<br>76<br>86<br>4 | 7.<br>73<br>32<br>2 | 5.<br>70<br>14<br>1 | 5.<br>94<br>31<br>9  | 4.8<br>289<br>069<br>59 | 2.2<br>716<br>966<br>67<br>59 | 4.8<br>28<br>90<br>69<br>59 | U<br>p | 0.0<br>08<br>47<br>54<br>35 | 0.6<br>63<br>32<br>74<br>04 |
| 55<br>34<br>0  | GIM<br>AP5  | Gtpase, IMAP<br>family member 5                                                       | 5.<br>00<br>17<br>8 | 5.<br>73<br>93<br>9 | 5.<br>83<br>87<br>4 | 7.<br>57<br>28<br>1 | 6.<br>65<br>78<br>8 | 6.<br>05<br>89<br>8  | 2.3<br>564<br>036<br>07 | 1.2<br>365<br>866<br>67       | 2.3<br>56<br>40<br>36<br>07 | U<br>p | 0.0<br>19<br>79<br>49<br>8  | 0.6<br>63<br>32<br>74<br>04 |
| 86<br>3        | CBF<br>A2T3 | Core-binding<br>factor, runt<br>domain, $\alpha$ subunit<br>2; translocated to, 3     | 4.<br>02<br>54<br>8 | 4.<br>52<br>13<br>6 | 4.<br>24<br>17<br>8 | 4.<br>91<br>05<br>9 | 5.<br>26<br>18<br>1 | 4.<br>64<br>91<br>4  | 1.5<br>995<br>210<br>74 | 0.6<br>776<br>4<br>10<br>74   | 1.5<br>99<br>52<br>10<br>74 | U<br>p | 0.0<br>14<br>50<br>05<br>31 | 0.6<br>63<br>32<br>74<br>04 |
| 44<br>16<br>31 | TSPA<br>N11 | Tetraspanin 11                                                                        | 5.<br>27<br>45<br>5 | 5.<br>54<br>38<br>5 | 5.<br>32<br>48<br>1 | 6.<br>99<br>74<br>5 | 6.<br>91<br>05<br>5 | 6.<br>20<br>49<br>5  | 2.5<br>022<br>859<br>55 | 1.3<br>232<br>466<br>67       | 2.5<br>02<br>28<br>59<br>55 | U<br>p | 0.0<br>00<br>94<br>97<br>2  | 0.6<br>63<br>32<br>74<br>04 |
| 84<br>90<br>9  | C9orf<br>3  | Chromosome 9<br>open reading frame<br>3                                               | 5.<br>43<br>69<br>3 | 5.<br>38<br>56<br>2 | 5.<br>16<br>89<br>1 | 6.<br>94<br>42<br>3 | 5.<br>76<br>89<br>3 | 5.<br>99<br>82<br>3  | 1.8<br>746<br>656<br>79 | 0.9<br>066<br>333<br>33       | 1.8<br>74<br>66<br>56       | U<br>p | 0.0<br>22<br>29<br>65       | 0.6<br>63<br>32<br>74       |

|                           |            |                                                            |                      |                     |                     |                      |                      |                      |                          |                          |                             |                  |                             |                             |
|---------------------------|------------|------------------------------------------------------------|----------------------|---------------------|---------------------|----------------------|----------------------|----------------------|--------------------------|--------------------------|-----------------------------|------------------|-----------------------------|-----------------------------|
|                           |            |                                                            |                      |                     |                     |                      |                      |                      |                          |                          | 79                          |                  | 48                          | 04                          |
| 34<br>92                  | IGH        | Immunoglobulin<br>heavy locus                              | 8.<br>49<br>73<br>6  | 9.<br>04<br>95<br>4 | 8.<br>21<br>78<br>7 | 9.<br>41<br>80<br>9  | 11<br>.8<br>59<br>83 | 11<br>.5<br>63<br>57 | 5.1<br>298<br>145<br>33  | 2.3<br>589<br>066<br>67  | 5.1<br>29<br>81<br>45<br>33 | U<br>p           | 0.0<br>06<br>85<br>66<br>94 | 0.6<br>63<br>32<br>74<br>04 |
| 54<br>65                  | PPA<br>RA  | Peroxisome<br>proliferator-activat<br>ed receptor $\alpha$ | 8.<br>54<br>50<br>1  | 8.<br>67<br>86<br>8 | 8.<br>33<br>93<br>7 | 7.<br>86<br>63<br>6  | 7.<br>50<br>99<br>1  | 8.<br>29<br>91<br>1  | -1.<br>546<br>735<br>669 | -0.<br>629<br>226<br>667 | 1.5<br>46<br>73<br>56<br>69 | D<br>o<br>w<br>n | 0.0<br>30<br>08<br>97<br>91 | 0.6<br>63<br>32<br>74<br>04 |
| 10<br>01<br>30<br>93<br>3 | SMI<br>M6  | Small integral<br>membrane protein<br>6                    | 9.<br>05<br>13<br>4  | 8.<br>59<br>27<br>5 | 9.<br>03<br>10<br>9 | 7.<br>35<br>28<br>9  | 7.<br>67<br>79<br>9  | 8.<br>68<br>51<br>9  | -1.<br>981<br>193<br>785 | -0.<br>986<br>37<br>37   | 1.9<br>81<br>19<br>37<br>85 | D<br>o<br>w<br>n | 0.0<br>26<br>00<br>67<br>11 | 0.6<br>63<br>32<br>74<br>04 |
| 84<br>08<br>4             | RAB<br>6C  | RAB6C, member<br>RAS oncogene<br>family                    | 3.<br>74<br>72<br>6  | 2.<br>92<br>60<br>1 | 3.<br>45<br>54<br>7 | 3.<br>90<br>01<br>3  | 4.<br>23<br>96<br>4  | 4.<br>29<br>00<br>3  | 1.7<br>017<br>510<br>5   | 0.7<br>670<br>2<br>5     | 1.7<br>01<br>75<br>10<br>5  | U<br>p           | 0.0<br>11<br>79<br>69<br>62 | 0.6<br>63<br>32<br>74<br>04 |
| 31<br>78                  | HNR<br>NPA | Heterogeneous<br>nuclear<br>ribonucleoprotein<br>A1        | 10<br>.5<br>41<br>79 | 9.<br>84<br>63<br>8 | 10<br>.5<br>54<br>8 | 11<br>.2<br>45<br>93 | 10<br>.7<br>69<br>17 | 10<br>.7<br>90<br>45 | 1.5<br>378<br>200<br>2   | 0.6<br>208<br>866<br>67  | 1.5<br>37<br>82<br>00<br>2  | U<br>p           | 0.0<br>41<br>12<br>90<br>93 | 0.6<br>63<br>32<br>74<br>04 |
| 97<br>83                  | RIM<br>S3  | Regulating<br>synaptic membrane<br>exocytosis 3            | 4.<br>52<br>47       | 5.<br>10<br>6       | 4.<br>83<br>32      | 6.<br>13<br>68       | 5.<br>69<br>57       | 4.<br>95<br>45       | 1.7<br>104<br>429        | 0.7<br>743<br>7          | 1.7<br>10<br>44             | U<br>p           | 0.0<br>45<br>02             | 0.6<br>63<br>32             |

|    |      |                    |    |    |    |    |    |    |     |     |     |   |     |     |
|----|------|--------------------|----|----|----|----|----|----|-----|-----|-----|---|-----|-----|
|    |      |                    | 6  |    | 5  | 1  | 3  | 8  | 67  |     | 29  |   | 67  | 74  |
|    |      |                    |    |    |    |    |    |    |     |     | 67  |   | 89  | 04  |
| 10 | CEB  | CCAAT/enhancer     | 8. | 8. | 8. | 9. | 10 | 8. | 2.0 | 1.0 | 2.0 | U | 0.0 | 0.6 |
| 52 | PD   | binding protein    | 45 | 75 | 12 | 60 | .3 | 55 | 758 | 536 | 75  | p | 46  | 63  |
|    |      | (C/EBP), Δ         | 61 | 25 | 26 | 63 | 33 | 21 | 228 | 833 | 82  |   | 02  | 32  |
|    |      |                    | 4  | 5  | 7  | 7  | 85 | 9  | 55  | 33  | 28  |   | 28  | 74  |
|    |      |                    |    |    |    |    |    |    |     |     | 55  |   | 16  | 04  |
| 19 | S1PR | Sphingosine-1-pho  | 3. | 5. | 4. | 7. | 6. | 6. | 4.1 | 2.0 | 4.1 | U | 0.0 | 0.6 |
| 03 | 3    | sphate receptor 3  | 92 | 95 | 17 | 52 | 24 | 49 | 913 | 674 | 91  | p | 09  | 63  |
|    |      |                    | 66 | 35 | 88 | 07 | 46 | 58 | 451 | 133 | 34  |   | 21  | 32  |
|    |      |                    | 6  | 4  | 1  | 1  | 7  | 7  | 6   | 33  | 51  |   | 08  | 74  |
|    |      |                    |    |    |    |    |    |    |     |     | 6   |   | 02  | 04  |
| 58 | PYG  | Phosphorylase,     | 3. | 4. | 3. | 5. | 4. | 3. | 1.8 | 0.9 | 1.8 | U | 0.0 | 0.6 |
| 36 | L    | glycogen, liver    | 21 | 11 | 80 | 06 | 82 | 97 | 779 | 091 | 77  | p | 30  | 63  |
|    |      |                    | 60 | 57 | 69 | 23 | 62 | 74 | 040 | 233 | 90  |   | 79  | 32  |
|    |      |                    | 9  | 1  | 3  | 4  | 9  | 7  | 26  | 33  | 40  |   | 70  | 74  |
|    |      |                    |    |    |    |    |    |    |     |     | 26  |   | 63  | 04  |
| 11 | EPB4 | EPB41L4A           | 8. | 7. | 8. | 9. | 8. | 8. | 1.7 | 0.7 | 1.7 | U | 0.0 | 0.6 |
| 49 | 1L4A | antisense RNA 1    | 09 | 70 | 01 | 30 | 42 | 41 | 135 | 770 | 13  | p | 26  | 63  |
| 15 | -AS1 |                    | 35 | 58 | 66 | 92 | 71 | 06 | 955 | 266 | 59  |   | 32  | 32  |
|    |      |                    | 1  | 6  | 5  | 2  | 9  | 9  | 83  | 67  | 55  |   | 07  | 74  |
|    |      |                    |    |    |    |    |    |    |     |     | 83  |   |     | 04  |
| 58 | BCA  | Branched chain     | 4. | 4. | 4. | 6. | 5. | 5. | 2.0 | 1.0 | 2.0 | U | 0.0 | 0.6 |
| 6  | T1   | amino-acid         | 08 | 99 | 49 | 14 | 43 | 01 | 099 | 071 | 09  | p | 22  | 63  |
|    |      | transaminase 1,    | 97 | 68 | 16 | 98 | 35 | 61 | 133 | 333 | 91  |   | 01  | 32  |
|    |      | cytosolic          | 1  | 2  | 2  | 2  | 7  | 6  | 88  | 33  | 33  |   | 92  | 74  |
|    |      |                    |    |    |    |    |    |    |     |     | 88  |   | 25  | 04  |
| 79 | CEN  | Centromere protein | 3. | 3. | 3. | 5. | 6. | 3. | 2.6 | 1.4 | 2.6 | U | 0.0 | 0.6 |
| 68 | PU   | U                  | 53 | 57 | 96 | 66 | 03 | 65 | 840 | 244 | 84  | p | 43  | 63  |

|    |      |                           |               |               |               |               |               |               |                   |                   |                      |             |                      |                      |
|----|------|---------------------------|---------------|---------------|---------------|---------------|---------------|---------------|-------------------|-------------------|----------------------|-------------|----------------------|----------------------|
| 2  |      |                           | 55<br>2       | 29<br>7       | 33<br>4       | 01<br>2       | 35<br>5       | 13<br>7       | 347<br>19         | 033<br>33         | 03<br>47<br>19       |             | 61<br>43<br>01       | 32<br>74<br>04       |
| 23 | PPP1 | Protein                   | 7.            | 7.            | 7.            | 7.            | 8.            | 7.            | 1.6               | 0.7               | 1.6                  | U           | 0.0                  | 0.6                  |
| 64 | R15  | phosphatase 1             | 26            | 10            | 07            | 49            | 22            | 85            | 327               | 072               | 32                   | p           | 13                   | 63                   |
| 5  | A    | regulatory subunit<br>15A | 21<br>3       | 52            | 92<br>8       | 05<br>4       | 17            | 62<br>3       | 304<br>87         | 866<br>67         | 73<br>04<br>87       |             | 30<br>25<br>15       | 32<br>74<br>04       |
| 55 | ZCW  | Zinc finger, CW           | 5.            | 5.            | 4.            | 4.            | 4.            | 4.            | -1.               | -0.               | 1.5                  | D           | 0.0                  | 0.6                  |
| 06 | PW1  | type with PWWP            | 44            | 02            | 78            | 14            | 50            | 59            | 588               | 667               | 88                   | o           | 17                   | 63                   |
| 3  |      | domain 1                  | 53<br>2       | 11            | 35<br>8       | 56<br>4       | 74<br>6       | 32<br>1       | 755<br>001        | 896<br>667        | 75<br>50<br>01       | w<br>n      | 96<br>14<br>4        | 32<br>74<br>04       |
| 62 | BDH  | 3-hydroxybutyrate         | 7.            | 7.            | 7.            | 6.            | 6.            | 7.            | -2.               | -1.               | 2.2                  | D           | 0.0                  | 0.6                  |
| 2  | 1    | dehydrogenase,<br>type 1  | 84<br>84<br>5 | 99<br>43<br>3 | 31<br>65<br>2 | 15<br>85<br>9 | 07<br>01<br>6 | 48<br>33<br>5 | 217<br>703<br>765 | 149<br>066<br>667 | 17<br>70<br>37<br>65 | o<br>w<br>n | 24<br>62<br>78<br>18 | 63<br>32<br>74<br>04 |
| 30 | ANX  | Annexin A1                | 5.            | 7.            | 7.            | 9.            | 9.            | 7.            | 3.8               | 1.9               | 3.8                  | U           | 0.0                  | 0.6                  |
| 1  | A1   |                           | 49<br>85<br>5 | 68<br>22<br>5 | 30<br>17<br>9 | 23<br>26<br>8 | 39<br>40<br>4 | 64<br>63<br>9 | 110<br>098<br>4   | 301<br>733<br>33  | 11<br>00<br>98<br>4  | p           | 24<br>23<br>29<br>82 | 63<br>32<br>74<br>04 |
| 28 | FAM  | Family with               | 9.            | 8.            | 8.            | 8.            | 8.            | 8.            | -1.               | -0.               | 1.5                  | D           | 0.0                  | 0.6                  |
| 60 | 83H  | sequence similarity       | 14            | 73            | 67            | 10            | 55            | 11            | 509               | 593               | 09                   | o           | 24                   | 63                   |
| 77 |      | 83 member H               | 06<br>3       | 36<br>4       | 85<br>4       | 76<br>7       | 22<br>7       | 15            | 216<br>732        | 8                 | 21<br>67<br>32       | w<br>n      | 07<br>62<br>79       | 32<br>74<br>04       |
| 20 | EPH  | EPH receptor A4           | 4.            | 4.            | 4.            | 5.            | 6.            | 5.            | 2.5               | 1.3               | 2.5                  | U           | 0.0                  | 0.6                  |

|               |             |                                                                |                     |                     |                     |                     |                     |                     |                          |                          |                             |                  |                             |                             |
|---------------|-------------|----------------------------------------------------------------|---------------------|---------------------|---------------------|---------------------|---------------------|---------------------|--------------------------|--------------------------|-----------------------------|------------------|-----------------------------|-----------------------------|
| 43            | A4          |                                                                | 66<br>03<br>3       | 83<br>17<br>2       | 23<br>72<br>7       | 38<br>98<br>3       | 69<br>76<br>2       | 70<br>44<br>9       | 565<br>649<br>29         | 542<br>066<br>67         | 56<br>56<br>49<br>29        | p                | 06<br>27<br>41<br>55        | 63<br>32<br>74<br>04        |
| 53<br>84<br>1 | CDH<br>R5   | Cadherin related<br>family member 5                            | 9.<br>25<br>72<br>7 | 8.<br>86<br>94<br>4 | 8.<br>44<br>68<br>2 | 7.<br>35<br>20<br>1 | 7.<br>51<br>84<br>7 | 8.<br>57<br>76<br>1 | -2.<br>058<br>813<br>765 | -1.<br>041<br>813<br>333 | 2.0<br>58<br>81<br>37<br>65 | D<br>o<br>w<br>n | 0.0<br>24<br>70<br>41<br>73 | 0.6<br>63<br>32<br>74<br>04 |
| 74<br>74      | WNT<br>5A   | Wingless-type<br>MMTV integration<br>site family member<br>5A  | 4.<br>39<br>81      | 4.<br>59<br>91<br>7 | 4.<br>47<br>01<br>9 | 6.<br>11<br>44<br>3 | 5.<br>32<br>50<br>3 | 5.<br>54<br>90<br>6 | 2.2<br>558<br>742<br>77  | 1.1<br>736<br>866<br>67  | 2.2<br>55<br>87<br>42<br>77 | U<br>p           | 0.0<br>01<br>18<br>79<br>95 | 0.6<br>63<br>32<br>74<br>04 |
| 20<br>04      | ELK<br>3    | ELK3,<br>ETS-domain<br>protein (SRF<br>accessory protein<br>2) | 6.<br>83<br>25      | 7.<br>29<br>14<br>7 | 7.<br>81<br>05<br>3 | 8.<br>68<br>76<br>9 | 8.<br>69<br>45<br>5 | 7.<br>56<br>68<br>5 | 2.0<br>067<br>533<br>88  | 1.0<br>048<br>633<br>33  | 2.0<br>06<br>75<br>33<br>88 | U<br>p           | 0.0<br>33<br>18<br>88<br>45 | 0.6<br>63<br>32<br>74<br>04 |
| 10<br>23<br>0 | NBR<br>2    | Neighbor of<br>BRCA1 gene 2<br>(non-protein<br>coding)         | 6.<br>25<br>85<br>3 | 6.<br>55<br>83<br>8 | 6.<br>92<br>05<br>1 | 6.<br>02<br>64<br>5 | 5.<br>41<br>54<br>4 | 6.<br>27<br>99<br>2 | -1.<br>593<br>136<br>63  | -0.<br>671<br>87<br>63   | 1.5<br>93<br>13<br>66<br>3  | D<br>o<br>w<br>n | 0.0<br>46<br>70<br>43<br>38 | 0.6<br>63<br>32<br>74<br>04 |
| 51<br>31<br>3 | FAM<br>198B | Family with<br>sequence similarity<br>198 member B             | 4.<br>17<br>22<br>6 | 4.<br>41<br>07<br>1 | 4.<br>57<br>91<br>1 | 7.<br>02<br>57<br>3 | 6.<br>34<br>05<br>8 | 4.<br>64<br>26<br>9 | 3.0<br>644<br>751<br>37  | 1.6<br>156<br>4<br>37    | 3.0<br>64<br>47<br>51<br>37 | U<br>p           | 0.0<br>23<br>07<br>79<br>71 | 0.6<br>63<br>32<br>74<br>04 |

|    |      |                    |    |    |    |    |    |    |     |     |     |   |     |     |
|----|------|--------------------|----|----|----|----|----|----|-----|-----|-----|---|-----|-----|
| 54 | FBLI | Filamin binding    | 9. | 9. | 8. | 8. | 8. | 8. | -1. | -0. | 1.6 | D | 0.0 | 0.6 |
| 75 | M1   | LIM protein 1      | 29 | 00 | 71 | 08 | 29 | 58 | 606 | 683 | 06  | o | 15  | 63  |
| 1  |      |                    | 09 | 43 | 15 | 28 | 06 | 15 | 536 | 953 | 53  | w | 40  | 32  |
|    |      |                    | 1  | 7  | 8  | 5  | 5  |    | 026 | 333 | 60  | n | 79  | 74  |
|    |      |                    |    |    |    |    |    |    |     |     | 26  |   | 28  | 04  |
| 10 | TGO  | Trans-golgi        | 7. | 7. | 7. | 6. | 7. | 7. | -1. | -0. | 1.5 | D | 0.0 | 0.6 |
| 61 | LN2  | network protein 2  | 54 | 67 | 33 | 50 | 16 | 10 | 502 | 586 | 02  | o | 34  | 63  |
| 8  |      |                    | 07 | 33 | 00 | 95 | 41 | 98 | 026 | 91  | 02  | w | 01  | 32  |
|    |      |                    | 5  | 9  | 6  | 4  | 3  |    | 223 |     | 62  | n | 23  | 74  |
|    |      |                    |    |    |    |    |    |    |     |     | 23  |   | 52  | 04  |
| 57 | ARH  | Rho gtpase         | 5. | 6. | 5. | 7. | 6. | 6. | 2.3 | 1.2 | 2.3 | U | 0.0 | 0.6 |
| 63 | GAP  | activating protein | 03 | 10 | 52 | 53 | 77 | 10 | 823 | 523 | 82  | p | 19  | 63  |
| 6  | 23   | 23                 | 62 | 40 | 13 | 88 | 87 | 11 | 411 | 8   | 34  |   | 33  | 32  |
|    |      |                    | 2  | 8  | 7  | 7  | 9  | 5  | 15  |     | 111 |   | 98  | 74  |
|    |      |                    |    |    |    |    |    |    |     |     | 5   |   | 91  | 04  |
| 12 | NEU  | Neuraminidase 4    | 7. | 7. | 7. | 6. | 6. | 7. | -1. | -0. | 1.5 | D | 0.0 | 0.6 |
| 98 | 4    | (sialidase)        | 63 | 91 | 98 | 94 | 96 | 68 | 563 | 644 | 63  | o | 33  | 63  |
| 07 |      |                    | 61 | 22 | 56 | 99 | 16 | 91 | 157 | 463 | 15  | w | 30  | 32  |
|    |      |                    | 6  | 7  | 8  | 8  |    | 4  | 701 | 333 | 77  | n | 89  | 74  |
|    |      |                    |    |    |    |    |    |    |     |     | 01  |   | 8   | 04  |
| 90 | USP2 | Ubiquitin specific | 6. | 5. | 5. | 3. | 5. | 5. | -2. | -1. | 2.5 | D | 0.0 | 0.6 |
| 99 |      | peptidase 2        | 73 | 88 | 96 | 81 | 20 | 50 | 550 | 350 | 50  | o | 22  | 63  |
|    |      |                    | 04 | 22 | 12 | 92 | 15 | 16 | 028 | 513 | 02  | w | 10  | 32  |
|    |      |                    |    | 3  | 5  | 2  | 2  |    | 433 | 333 | 84  | n | 11  | 74  |
|    |      |                    |    |    |    |    |    |    |     |     | 33  |   | 25  | 04  |
| 51 | GMN  | Geminin, DNA       | 6. | 6. | 6. | 7. | 7. | 6. | 1.7 | 0.7 | 1.7 | U | 0.0 | 0.6 |
| 05 | N    | replication        | 57 | 68 | 93 | 71 | 99 | 82 | 152 | 784 | 15  | p | 40  | 63  |
| 3  |      | inhibitor          | 94 | 61 | 97 | 34 | 91 | 79 | 672 | 333 | 26  |   | 65  | 32  |
|    |      |                    | 1  |    | 7  | 9  | 5  | 4  |     | 33  | 72  |   | 46  | 74  |

|    |      |                     |    |    |    |    |    |    |     |     |     |   |     |     |
|----|------|---------------------|----|----|----|----|----|----|-----|-----|-----|---|-----|-----|
|    |      |                     |    |    |    |    |    |    |     |     |     |   | 31  | 04  |
| 51 | PDG  | Platelet-derived    | 5. | 7. | 6. | 9. | 8. | 7. | 3.3 | 1.7 | 3.3 | U | 0.0 | 0.6 |
| 59 | FRB  | growth factor       | 74 | 25 | 59 | 04 | 30 | 51 | 809 | 574 | 80  | p | 08  | 63  |
|    |      | receptor, $\beta$   | 03 | 86 | 68 | 40 | 81 | 60 | 999 | 5   | 99  |   | 88  | 32  |
|    |      | polypeptide         | 1  | 9  | 8  | 3  | 4  | 6  | 62  |     | 99  |   | 42  | 74  |
|    |      |                     |    |    |    |    |    |    |     |     | 62  |   | 07  | 04  |
| 51 | CD3  | CD320 molecule      | 6. | 6. | 6. | 7. | 7. | 6. | 1.5 | 0.6 | 1.5 | U | 0.0 | 0.6 |
| 29 | 20   |                     | 08 | 38 | 31 | 26 | 00 | 49 | 807 | 605 | 80  | p | 24  | 63  |
| 3  |      |                     | 18 | 32 | 35 | 14 | 74 | 14 | 325 | 933 | 73  |   | 28  | 32  |
|    |      |                     | 7  | 1  | 8  | 7  | 8  | 9  | 94  | 33  | 25  |   | 21  | 74  |
|    |      |                     |    |    |    |    |    |    |     |     | 94  |   | 08  | 04  |
| 53 | PMP  | Peripheral myelin   | 7. | 9. | 8. | 10 | 10 | 9. | 2.7 | 1.4 | 2.7 | U | 0.0 | 0.6 |
| 76 | 22   | protein 22          | 16 | 06 | 89 | .2 | .1 | 10 | 644 | 670 | 64  | p | 33  | 63  |
|    |      |                     | 55 | 56 | 87 | 94 | 30 | 67 | 963 | 166 | 49  |   | 04  | 32  |
|    |      |                     | 4  | 5  | 7  | 17 | 05 | 9  | 5   | 67  | 63  |   | 12  | 74  |
|    |      |                     |    |    |    |    |    |    |     |     | 5   |   | 45  | 04  |
| 83 | GLT8 | Glycosyltransferas  | 4. | 5. | 5. | 7. | 5. | 5. | 2.1 | 1.0 | 2.1 | U | 0.0 | 0.6 |
| 46 | D2   | e 8 domain          | 49 | 41 | 32 | 09 | 67 | 73 | 298 | 907 | 29  | p | 40  | 63  |
| 8  |      | containing 2        | 69 | 59 | 55 | 89 | 73 | 44 | 571 | 566 | 85  |   | 93  | 32  |
|    |      |                     | 7  | 3  | 3  | 4  | 6  |    | 42  | 67  | 71  |   | 61  | 74  |
|    |      |                     |    |    |    |    |    |    |     |     | 42  |   | 41  | 04  |
| 55 | APP  | Adaptor protein,    | 8. | 8. | 9. | 7. | 8. | 8. | -1. | -0. | 1.5 | D | 0.0 | 0.6 |
| 19 | L2   | phosphotyrosine     | 95 | 73 | 12 | 93 | 19 | 83 | 537 | 620 | 37  | o | 47  | 63  |
| 8  |      | interaction, PH     | 78 | 88 | 89 | 30 | 22 | 80 | 681 | 756 | 68  | w | 40  | 32  |
|    |      | domain and leucine  | 7  | 9  |    | 8  | 7  | 4  | 455 | 667 | 14  | n | 08  | 74  |
|    |      | zipper containing 2 |    |    |    |    |    |    |     |     | 55  |   | 55  | 04  |
| 86 | SLC4 | Solute carrier      | 9. | 9. | 8. | 7. | 8. | 8. | -1. | -0. | 1.8 | D | 0.0 | 0.6 |
| 71 | A4   | family 4 (sodium    | 20 | 07 | 72 | 41 | 26 | 61 | 873 | 906 | 73  | o | 25  | 63  |
|    |      | bicarbonate         | 98 | 58 | 57 | 18 | 32 | 82 | 899 | 043 | 89  | w | 78  | 32  |



|    |      |                             |    |    |    |    |    |    |     |     |     |   |     |     |
|----|------|-----------------------------|----|----|----|----|----|----|-----|-----|-----|---|-----|-----|
|    |      | cotransporter),<br>member 4 |    | 6  | 8  | 2  | 9  |    | 178 | 333 | 91  | n | 61  | 74  |
|    |      |                             |    |    |    |    |    |    |     |     | 78  |   | 04  | 04  |
| 66 | SOA  | Sterol                      | 8. | 7. | 8. | 7. | 7. | 7. | -1. | -0. | 1.5 | D | 0.0 | 0.6 |
| 46 | T1   | O-acyltransferase 1         | 46 | 85 | 29 | 29 | 64 | 76 | 557 | 638 | 57  | o | 23  | 63  |
|    |      |                             | 68 | 88 | 90 | 84 | 84 | 13 | 047 | 813 | 04  | w | 02  | 32  |
|    |      |                             | 1  | 4  | 3  | 3  | 5  | 6  | 907 | 333 | 79  | n | 98  | 74  |
|    |      |                             |    |    |    |    |    |    |     |     | 07  |   | 2   | 04  |
| 37 | PEA  | Platelet endothelial        | 3. | 3. | 4. | 6. | 5. | 4. | 2.3 | 1.2 | 2.3 | U | 0.0 | 0.6 |
| 50 | R1   | aggregation                 | 61 | 90 | 08 | 00 | 33 | 03 | 878 | 556 | 87  | p | 30  | 63  |
| 33 |      | receptor 1                  | 61 | 56 | 90 | 31 | 61 | 85 | 022 | 833 | 80  |   | 07  | 32  |
|    |      |                             | 1  | 2  | 9  | 4  | 8  | 5  | 02  | 33  | 22  |   | 94  | 74  |
|    |      |                             |    |    |    |    |    |    |     |     | 02  |   | 02  | 04  |
| 35 | IGK  | Immunoglobulin $\kappa$     | 9. | 10 | 10 | 10 | 13 | 12 | 4.3 | 2.1 | 4.3 | U | 0.0 | 0.6 |
| 14 | C    | constant                    | 98 | .5 | .0 | .8 | .1 | .9 | 213 | 114 | 21  | p | 07  | 63  |
|    |      |                             | 69 | 22 | 69 | 78 | 14 | 19 | 437 | 8   | 34  |   | 52  | 32  |
|    |      |                             | 2  | 86 | 24 | 67 | 85 | 94 | 57  |     | 37  |   | 56  | 74  |
|    |      |                             |    |    |    |    |    |    |     |     | 57  |   | 87  | 04  |
| 64 | ABC  | ATP binding                 | 8. | 7. | 8. | 5. | 3. | 7. | -7. | -2. | 7.1 | D | 0.0 | 0.6 |
| 24 | G5   | cassette subfamily          | 67 | 87 | 56 | 42 | 52 | 64 | 168 | 841 | 68  | o | 18  | 63  |
| 0  |      | G member 5                  | 81 | 63 | 18 | 15 | 19 | 75 | 940 | 76  | 94  | w | 43  | 32  |
|    |      |                             | 4  | 4  | 6  | 1  | 6  | 9  | 906 |     | 09  | n | 14  | 74  |
|    |      |                             |    |    |    |    |    |    |     |     | 06  |   | 98  | 04  |
| 56 | PCD  | Protocadherin $\alpha$ 12   | 7. | 7. | 6. | 6. | 6. | 6. | -1. | -0. | 1.5 | D | 0.0 | 0.6 |
| 13 | HA1  |                             | 44 | 73 | 91 | 53 | 83 | 80 | 557 | 639 | 57  | o | 31  | 63  |
| 7  | 2    |                             | 20 | 45 | 29 | 69 | 18 | 31 | 526 | 256 | 52  | w | 81  | 32  |
|    |      |                             | 9  | 2  | 9  |    | 2  | 1  | 454 | 667 | 64  | n | 64  | 74  |
|    |      |                             |    |    |    |    |    |    |     |     | 54  |   | 86  | 04  |
| 18 | E2F5 | E2F transcription           | 7. | 7. | 7. | 6. | 6. | 7. | -1. | -0. | 1.6 | D | 0.0 | 0.6 |
| 75 |      | factor 5,                   | 79 | 41 | 99 | 89 | 80 | 38 | 636 | 710 | 36  | o | 18  | 63  |

|                |                    |                                                |                     |                     |                     |                     |                     |                     |                          |                          |                             |                  |                             |                             |
|----------------|--------------------|------------------------------------------------|---------------------|---------------------|---------------------|---------------------|---------------------|---------------------|--------------------------|--------------------------|-----------------------------|------------------|-----------------------------|-----------------------------|
|                |                    | p130-binding                                   | 74<br>8             | 90<br>7             | 43<br>2             | 15<br>2             | 02<br>4             | 69<br>5             | 620<br>695               | 72                       | 62<br>06<br>95              | w<br>n           | 51<br>15<br>3               | 32<br>74<br>04              |
| 50<br>19       | OXC<br>T1          | 3-oxoacid<br>coa-transferase 1                 | 3.<br>39<br>85<br>6 | 4.<br>50<br>65<br>7 | 3.<br>53<br>36<br>3 | 6.<br>68<br>59<br>9 | 4.<br>43<br>98<br>8 | 4.<br>70<br>30<br>7 | 2.7<br>575<br>620<br>19  | 1.4<br>633<br>933<br>33  | 2.7<br>57<br>56<br>20<br>19 | U<br>p           | 0.0<br>47<br>06<br>01<br>9  | 0.6<br>63<br>32<br>74<br>04 |
| 64<br>29<br>46 | FLV<br>CR1-<br>AS1 | FLVCR1 antisense<br>RNA 1 (head to<br>head)    | 7.<br>42<br>37<br>4 | 7.<br>08<br>02<br>6 | 7.<br>05<br>86<br>2 | 6.<br>20<br>56<br>5 | 6.<br>18<br>59<br>4 | 5.<br>72<br>75<br>3 | -2.<br>215<br>808<br>701 | -1.<br>147<br>833<br>333 | 2.2<br>15<br>80<br>87<br>01 | D<br>o<br>w<br>n | 0.0<br>00<br>76<br>73<br>12 | 0.6<br>63<br>32<br>74<br>04 |
| 28<br>91<br>2  | IGK<br>V3-2<br>0   | Immunoglobulin κ<br>variable 3-20              | 2.<br>96<br>15<br>1 | 3.<br>44<br>17<br>2 | 3.<br>50<br>44<br>4 | 3.<br>70<br>34<br>7 | 7.<br>00<br>72<br>6 | 5.<br>93<br>52<br>2 | 4.7<br>439<br>648<br>93  | 2.2<br>460<br>933<br>33  | 4.7<br>43<br>96<br>48<br>93 | U<br>p           | 0.0<br>20<br>64<br>83<br>96 | 0.6<br>63<br>32<br>74<br>04 |
| 23<br>41<br>4  | ZFP<br>M2          | Zinc finger protein,<br>FOG family<br>member 2 | 3.<br>26<br>45<br>1 | 3.<br>56<br>81<br>4 | 4.<br>38<br>59<br>6 | 6.<br>53<br>78<br>7 | 5.<br>16<br>30<br>7 | 4.<br>42<br>68<br>6 | 3.1<br>088<br>837<br>4   | 1.6<br>363<br>966<br>67  | 3.1<br>08<br>88<br>37<br>4  | U<br>p           | 0.0<br>19<br>74<br>49<br>35 | 0.6<br>63<br>32<br>74<br>04 |
| 79<br>63<br>3  | FAT4               | FAT atypical<br>cadherin 4                     | 4.<br>43<br>49<br>5 | 5.<br>15<br>70<br>5 | 4.<br>51<br>48<br>4 | 6.<br>99<br>33<br>9 | 6.<br>04<br>77<br>1 | 5.<br>75<br>31<br>3 | 2.9<br>535<br>772<br>25  | 1.5<br>624<br>633<br>33  | 2.9<br>53<br>57<br>72<br>25 | U<br>p           | 0.0<br>03<br>25<br>20<br>33 | 0.6<br>63<br>32<br>74<br>04 |
| 30             | ST6                | ST6                                            | 4.                  | 4.                  | 5.                  | 6.                  | 5.                  | 5.                  | 1.6                      | 0.7                      | 1.6                         | U                | 0.0                         | 0.6                         |

|    |      |                                                                                                     |    |    |    |    |    |    |     |     |     |   |     |     |
|----|------|-----------------------------------------------------------------------------------------------------|----|----|----|----|----|----|-----|-----|-----|---|-----|-----|
| 81 | GAL  | ( $\alpha$ -N-acetyl-neuraminyl-2,3- $\beta$ -galactosyl-1,3)-N-acetylglucosaminide                 | 92 | 42 | 02 | 17 | 31 | 12 | 754 | 445 | 75  | p | 47  | 63  |
| 5  | NAC  |                                                                                                     | 94 | 53 | 93 | 44 | 49 | 83 | 012 | 066 | 40  |   | 33  | 32  |
| 6  |      |                                                                                                     | 7  | 4  | 3  | 3  | 1  | 2  | 64  | 67  | 12  |   | 89  | 74  |
|    |      | alactosaminide                                                                                      |    |    |    |    |    |    |     |     | 64  |   | 38  | 04  |
|    |      | $\alpha$ -2,6-sialyltransferase 6                                                                   |    |    |    |    |    |    |     |     |     |   |     |     |
| 39 | ARH  | Rho GDP dissociation inhibitor (GDI) $\beta$                                                        | 6. | 7. | 7. | 8. | 8. | 7. | 1.7 | 0.8 | 1.7 | U | 0.0 | 0.6 |
| 7  | GDI  |                                                                                                     | 77 | 57 | 75 | 47 | 35 | 69 | 485 | 061 | 48  | p | 41  | 63  |
| B  |      |                                                                                                     | 55 | 37 | 31 | 68 | 30 | 09 | 188 | 333 | 51  |   | 17  | 32  |
|    |      |                                                                                                     | 2  | 7  | 4  | 8  | 2  | 3  | 31  | 33  | 88  |   | 29  | 74  |
|    |      |                                                                                                     |    |    |    |    |    |    |     |     | 31  |   | 56  | 04  |
| 12 | KLH  | Kelch domain containing 7A                                                                          | 7. | 6. | 6. | 6. | 5. | 6. | -1. | -0. | 1.5 | D | 0.0 | 0.6 |
| 77 | DC7  |                                                                                                     | 07 | 58 | 58 | 13 | 88 | 36 | 531 | 615 | 31  | o | 23  | 63  |
| 07 | A    |                                                                                                     | 53 | 58 | 19 | 94 | 96 | 81 | 851 | 276 | 85  | w | 49  | 32  |
|    |      |                                                                                                     | 5  | 5  |    | 7  | 9  | 1  | 733 | 667 | 17  | n | 02  | 74  |
|    |      |                                                                                                     |    |    |    |    |    |    |     |     | 33  |   | 18  | 04  |
| 34 | ID4  | Inhibitor of DNA binding 4, dominant negative helix-loop-helix protein                              | 4. | 3. | 3. | 6. | 6. | 6. | 6.9 | 2.7 | 6.9 | U | 4.4 | 0.0 |
| 00 |      |                                                                                                     | 01 | 46 | 43 | 28 | 72 | 27 | 189 | 905 | 18  | p | 89  | 43  |
|    |      |                                                                                                     | 14 | 48 | 63 | 25 | 43 | 73 | 510 | 533 | 95  |   | 4E- | 85  |
|    |      |                                                                                                     | 4  | 9  | 1  | 9  | 8  | 3  | 46  | 33  | 10  |   | 06  | 47  |
|    |      |                                                                                                     |    |    |    |    |    |    |     |     | 46  |   |     | 1   |
| 87 | SER  | Serpin peptidase inhibitor, clade H (heat shock protein 47), member 1, (collagen binding protein 1) | 6. | 6. | 6. | 8. | 7. | 7. | 1.7 | 0.7 | 1.7 | U | 0.0 | 0.6 |
| 1  | PINH |                                                                                                     | 82 | 71 | 81 | 25 | 20 | 24 | 185 | 811 | 18  | p | 33  | 63  |
| 1  |      |                                                                                                     | 74 | 45 | 43 | 36 | 30 | 31 | 359 | 8   | 53  |   | 15  | 32  |
|    |      |                                                                                                     | 7  |    | 4  | 7  | 7  | 1  | 12  |     | 59  |   | 56  | 74  |
|    |      |                                                                                                     |    |    |    |    |    |    |     |     | 12  |   | 47  | 04  |
| 11 | CLIC | Chloride intracellular                                                                              | 3. | 3. | 3. | 4. | 5. | 3. | 2.3 | 1.2 | 2.3 | U | 0.0 | 0.6 |
| 93 | 2    |                                                                                                     | 13 | 52 | 69 | 98 | 26 | 75 | 228 | 159 | 22  | p | 16  | 63  |

|    |      |                    |    |    |    |    |    |    |     |     |     |   |     |     |
|----|------|--------------------|----|----|----|----|----|----|-----|-----|-----|---|-----|-----|
|    |      | channel 2          | 31 | 49 | 24 | 63 | 00 | 19 | 993 | 266 | 89  |   | 35  | 32  |
|    |      |                    | 3  | 9  | 5  | 5  | 6  | 4  | 86  | 67  | 93  |   | 06  | 74  |
|    |      |                    |    |    |    |    |    |    |     |     | 86  |   | 45  | 04  |
| 71 | TPM  | Tropomyosin 4      | 8. | 8. | 8. | 9. | 9. | 8. | 1.6 | 0.7 | 1.6 | U | 0.0 | 0.6 |
| 71 | 4    |                    | 76 | 62 | 28 | 83 | 23 | 79 | 586 | 300 | 58  | p | 37  | 63  |
|    |      |                    | 22 | 55 | 34 | 39 | 15 | 58 | 927 | 466 | 69  |   | 53  | 32  |
|    |      |                    | 9  |    | 1  | 5  | 5  | 4  | 44  | 67  | 27  |   | 39  | 74  |
|    |      |                    |    |    |    |    |    |    |     |     | 44  |   | 12  | 04  |
| 33 | HSP  | Heat shock protein | 9. | 8. | 10 | 10 | 10 | 11 | 1.8 | 0.8 | 1.8 | U | 0.0 | 0.6 |
| 12 | A8   | family A (Hsp70)   | 92 | 99 | .3 | .6 | .2 | .0 | 420 | 813 | 42  | p | 48  | 63  |
|    |      | member 8           | 68 | 95 | 70 | 64 | 66 | 09 | 939 | 466 | 09  |   | 39  | 32  |
|    |      |                    | 5  | 5  | 01 | 72 | 23 | 5  | 8   | 67  | 39  |   | 47  | 74  |
|    |      |                    |    |    |    |    |    |    |     |     | 8   |   | 04  | 04  |
| 15 | CXA  | Coxsackie virus    | 12 | 12 | 12 | 11 | 11 | 12 | -1. | -0. | 1.7 | D | 0.0 | 0.6 |
| 25 | DR   | and adenovirus     | .9 | .7 | .4 | .6 | .9 | .1 | 718 | 780 | 18  | o | 05  | 63  |
|    |      | receptor           | 05 | 07 | 79 | 16 | 55 | 77 | 142 | 85  | 14  | w | 55  | 32  |
|    |      |                    | 64 | 81 | 23 | 88 | 4  | 85 | 862 |     | 28  | n | 20  | 74  |
|    |      |                    |    |    |    |    |    |    |     |     | 62  |   | 84  | 04  |
| 25 | CLIC | Chloride           | 5. | 5. | 5. | 7. | 6. | 5. | 1.8 | 0.9 | 1.8 | U | 0.0 | 0.6 |
| 93 | 4    | intracellular      | 64 | 84 | 70 | 25 | 69 | 95 | 736 | 058 | 73  | p | 25  | 63  |
| 2  |      | channel 4          | 87 | 59 | 03 | 78 | 96 | 52 | 827 | 766 | 68  |   | 34  | 32  |
|    |      |                    | 9  | 4  | 3  | 5  |    | 4  | 09  | 67  | 27  |   | 21  | 74  |
|    |      |                    |    |    |    |    |    |    |     |     | 09  |   | 87  | 04  |
| 56 | SERT | SERTA domain       | 4. | 4. | 4. | 6. | 5. | 5. | 1.9 | 0.9 | 1.9 | U | 0.0 | 0.6 |
| 25 | AD4  | containing 4       | 42 | 82 | 93 | 56 | 41 | 05 | 309 | 492 | 30  | p | 43  | 63  |
| 6  |      |                    | 36 | 73 | 36 | 05 | 38 | 80 | 087 | 8   | 90  |   | 01  | 32  |
|    |      |                    | 8  | 6  | 4  | 9  | 9  | 4  | 66  |     | 87  |   | 10  | 74  |
|    |      |                    |    |    |    |    |    |    |     |     | 66  |   | 57  | 04  |
| 79 | NSU  | NOP2/Sun RNA       | 5. | 4. | 4. | 3. | 3. | 4. | -2. | -1. | 2.3 | D | 0.0 | 0.6 |

|                |           |                                           |                      |                     |                      |                     |                     |                      |                          |                          |                             |                  |                             |                             |
|----------------|-----------|-------------------------------------------|----------------------|---------------------|----------------------|---------------------|---------------------|----------------------|--------------------------|--------------------------|-----------------------------|------------------|-----------------------------|-----------------------------|
| 73<br>0        | N7        | methyltransferase<br>family member 7      | 56<br>51<br>6        | 72<br>04<br>1       | 92<br>62<br>8        | 51<br>40<br>8       | 87<br>79<br>7       | 14<br>20<br>8        | 338<br>980<br>769        | 225<br>88<br>69          | 38<br>98<br>07<br>69        | o<br>w<br>n      | 02<br>32<br>60<br>8         | 63<br>32<br>74<br>04        |
| 37<br>76<br>77 | CA1<br>3  | Carbonic<br>anhydrase XIII                | 10<br>.0<br>83<br>86 | 9.<br>53<br>70<br>7 | 10<br>.0<br>97<br>13 | 7.<br>65<br>10<br>5 | 8.<br>45<br>95<br>5 | 9.<br>78<br>15<br>7  | -2.<br>420<br>485<br>861 | -1.<br>275<br>296<br>667 | 2.4<br>20<br>48<br>58<br>61 | D<br>o<br>w<br>n | 0.0<br>40<br>07<br>85<br>89 | 0.6<br>63<br>32<br>74<br>04 |
| 20<br>09<br>58 | MUC<br>20 | Mucin 20, cell<br>surface associated      | 9.<br>72<br>94<br>7  | 9.<br>50<br>13<br>9 | 8.<br>95<br>06<br>7  | 7.<br>34<br>98<br>5 | 8.<br>89<br>87<br>1 | 8.<br>70<br>46<br>6  | -2.<br>108<br>333<br>851 | -1.<br>076<br>103<br>333 | 2.1<br>08<br>33<br>38<br>51 | D<br>o<br>w<br>n | 0.0<br>40<br>43<br>36<br>21 | 0.6<br>63<br>32<br>74<br>04 |
| 25<br>87<br>8  | MXR<br>A5 | Matrix-remodelling<br>associated 5        | 4.<br>37<br>30<br>1  | 5.<br>78<br>09<br>8 | 4.<br>83<br>67<br>8  | 7.<br>86<br>50<br>1 | 5.<br>79<br>49<br>1 | 6.<br>47<br>62<br>18 | 3.2<br>832<br>926<br>18  | 1.7<br>151<br>433<br>33  | 3.2<br>83<br>29<br>26<br>18 | U<br>p           | 0.0<br>20<br>09<br>79<br>16 | 0.6<br>63<br>32<br>74<br>04 |
| 82<br>91       | DYS<br>F  | Dysferlin                                 | 4.<br>81<br>82<br>5  | 4.<br>64<br>03<br>8 | 4.<br>84<br>44<br>6  | 5.<br>39<br>93<br>8 | 5.<br>87<br>88<br>4 | 5.<br>17<br>56<br>8  | 1.6<br>436<br>882<br>16  | 0.7<br>169<br>366<br>67  | 1.6<br>43<br>68<br>82<br>16 | U<br>p           | 0.0<br>10<br>99<br>24<br>24 | 0.6<br>63<br>32<br>74<br>04 |
| 23<br>25<br>4  | KAZ<br>N  | Kazrin, periplakin<br>interacting protein | 5.<br>10<br>34       | 5.<br>48<br>93<br>4 | 4.<br>79<br>63<br>2  | 5.<br>85<br>15<br>8 | 6.<br>55<br>85<br>3 | 5.<br>66<br>25<br>3  | 1.8<br>589<br>998<br>67  | 0.8<br>945<br>266<br>67  | 1.8<br>58<br>99<br>98<br>67 | U<br>p           | 0.0<br>17<br>46<br>57<br>33 | 0.6<br>63<br>32<br>74<br>04 |

|                |            |                                                                          |                      |                      |                      |                     |                      |                      |                          |                          |                             |                  |                             |                             |
|----------------|------------|--------------------------------------------------------------------------|----------------------|----------------------|----------------------|---------------------|----------------------|----------------------|--------------------------|--------------------------|-----------------------------|------------------|-----------------------------|-----------------------------|
| 12<br>85       | COL<br>4A3 | Collagen, type IV,<br>$\alpha$ 3 (Goodpasture<br>antigen)                | 6.<br>24<br>73<br>9  | 5.<br>31<br>36<br>9  | 5.<br>39<br>23<br>6  | 4.<br>78<br>21<br>6 | 4.<br>65<br>82<br>9  | 5.<br>05<br>80<br>4  | -1.<br>763<br>347<br>322 | -0.<br>818<br>316<br>667 | 1.7<br>63<br>34<br>73<br>22 | D<br>o<br>w<br>n | 0.0<br>20<br>96<br>72<br>84 | 0.6<br>63<br>32<br>74<br>04 |
| 28<br>23       | GPM<br>6A  | Glycoprotein M6A                                                         | 2.<br>89<br>51<br>5  | 4.<br>15<br>28<br>3  | 3.<br>23<br>80<br>2  | 4.<br>93<br>59<br>9 | 3.<br>91<br>67<br>3  | 4.<br>69<br>09<br>43 | 2.1<br>226<br>600<br>43  | 1.0<br>858<br>733<br>33  | 2.1<br>22<br>66<br>00<br>43 | U<br>p           | 0.0<br>24<br>70<br>17<br>66 | 0.6<br>63<br>32<br>74<br>04 |
| 35<br>8        | AQP<br>1   | Aquaporin 1<br>(Colton blood<br>group)                                   | 12<br>.0<br>11<br>75 | 11<br>.7<br>22<br>46 | 11<br>.5<br>84<br>83 | 9.<br>94<br>09<br>8 | 9.<br>85<br>61<br>9  | 11<br>.7<br>29<br>71 | -2.<br>401<br>695<br>639 | -1.<br>264<br>053<br>333 | 2.4<br>01<br>69<br>56<br>39 | D<br>o<br>w<br>n | 0.0<br>35<br>90<br>50<br>19 | 0.6<br>63<br>32<br>74<br>04 |
| 11<br>40<br>88 | TRI<br>M9  | Tripartite motif<br>containing 9                                         | 7.<br>00<br>50<br>2  | 7.<br>63<br>14<br>3  | 7.<br>34<br>75<br>3  | 5.<br>73<br>07<br>3 | 6.<br>20<br>22<br>4  | 7.<br>12<br>21<br>4  | -1.<br>967<br>404<br>126 | -0.<br>976<br>293<br>333 | 1.9<br>67<br>40<br>41<br>26 | D<br>o<br>w<br>n | 0.0<br>31<br>71<br>18<br>19 | 0.6<br>63<br>32<br>74<br>04 |
| 51<br>77<br>6  | ZAK        | Sterile $\alpha$ motif and<br>leucine zipper<br>containing kinase<br>AZK | 7.<br>18<br>60<br>8  | 7.<br>41<br>76<br>1  | 7.<br>49<br>04<br>3  | 8.<br>77<br>94<br>9 | 7.<br>70<br>20<br>2  | 8.<br>01<br>10<br>7  | 1.7<br>404<br>817<br>26  | 0.7<br>994<br>866<br>67  | 1.7<br>40<br>48<br>17<br>26 | U<br>p           | 0.0<br>26<br>90<br>96<br>08 | 0.6<br>63<br>32<br>74<br>04 |
| 88<br>70       | IER3       | Immediate early<br>response 3                                            | 8.<br>43<br>65<br>9  | 8.<br>64<br>74<br>7  | 8.<br>07<br>13<br>6  | 9.<br>63<br>07<br>6 | 10<br>.0<br>42<br>64 | 8.<br>53<br>22<br>1  | 2.0<br>233<br>557<br>51  | 1.0<br>167<br>5<br>57    | 2.0<br>23<br>35<br>57       | U<br>p           | 0.0<br>34<br>19<br>24       | 0.6<br>63<br>32<br>74       |

|                |                 |                                                 |                      |                     |                     |                     |                     |                     |                          |                               |                             |                  |                             |                             |    |
|----------------|-----------------|-------------------------------------------------|----------------------|---------------------|---------------------|---------------------|---------------------|---------------------|--------------------------|-------------------------------|-----------------------------|------------------|-----------------------------|-----------------------------|----|
|                |                 |                                                 |                      |                     |                     |                     |                     |                     |                          |                               |                             | 51               |                             | 75                          | 04 |
| 51<br>29<br>9  | NRN<br>1        | Neuritin 1                                      | 4.<br>13<br>55<br>2  | 4.<br>25<br>42<br>1 | 5.<br>54<br>16<br>5 | 6.<br>04<br>69<br>6 | 7.<br>11<br>63<br>7 | 5.<br>16<br>51<br>7 | 2.7<br>619<br>425<br>93  | 1.4<br>656<br>833<br>33       | 2.7<br>61<br>94<br>25<br>93 | U<br>p           | 0.0<br>34<br>77<br>09<br>59 | 0.6<br>63<br>32<br>74<br>04 |    |
| 54<br>14       | SEPT<br>4       | Septin 4                                        | 3.<br>72<br>62<br>8  | 4.<br>55<br>20<br>2 | 3.<br>80<br>54<br>2 | 6.<br>37<br>77<br>9 | 5.<br>78<br>83<br>8 | 4.<br>24<br>86<br>4 | 2.7<br>201<br>697<br>16  | 1.4<br>436<br>966<br>67<br>16 | 2.7<br>20<br>16<br>97<br>16 | U<br>p           | 0.0<br>30<br>27<br>63<br>59 | 0.6<br>63<br>32<br>74<br>04 |    |
| 17<br>03<br>94 | PW<br>WP2<br>B  | PWWP domain<br>containing 2B                    | 8.<br>56<br>76<br>1  | 7.<br>93<br>8<br>1  | 8.<br>10<br>94<br>1 | 7.<br>35<br>76<br>1 | 7.<br>62<br>08<br>3 | 7.<br>76<br>42<br>7 | -1.<br>541<br>252<br>605 | -0.<br>624<br>103<br>333      | 1.5<br>41<br>25<br>26<br>05 | D<br>o<br>w<br>n | 0.0<br>23<br>67<br>11<br>61 | 0.6<br>63<br>32<br>74<br>04 |    |
| 40<br>45       | LSA<br>MP       | Limbic<br>system-associated<br>membrane protein | 4.<br>09<br>44<br>6  | 4.<br>78<br>86<br>4 | 4.<br>37<br>24<br>7 | 4.<br>96<br>37<br>2 | 5.<br>22<br>78<br>3 | 4.<br>91<br>84<br>9 | 1.5<br>349<br>127<br>68  | 0.6<br>181<br>566<br>67       | 1.5<br>34<br>91<br>27<br>68 | U<br>p           | 0.0<br>21<br>00<br>91<br>57 | 0.6<br>63<br>32<br>74<br>04 |    |
| 57<br>47<br>6  | GRA<br>MD1<br>B | GRAM domain<br>containing 1B                    | 10<br>.2<br>24<br>44 | 9.<br>77<br>06<br>2 | 9.<br>81<br>41<br>2 | 8.<br>19<br>06<br>8 | 9.<br>25<br>89<br>9 | 9.<br>39<br>21<br>3 | -1.<br>984<br>983<br>021 | -0.<br>989<br>126<br>667      | 1.9<br>84<br>98<br>30<br>21 | D<br>o<br>w<br>n | 0.0<br>21<br>25<br>33<br>36 | 0.6<br>63<br>32<br>74<br>04 |    |
| 96<br>48       | GCC<br>2        | GRIP and<br>coiled-coil domain<br>containing 2  | 7.<br>66<br>18       | 6.<br>99<br>29      | 6.<br>96<br>16      | 6.<br>47<br>66      | 6.<br>34<br>25      | 6.<br>83<br>25      | -1.<br>574<br>474        | -0.<br>654<br>87              | 1.5<br>74<br>47             | D<br>o<br>w      | 0.0<br>33<br>03             | 0.6<br>63<br>32             |    |

|    |      |                     |    |    |    |    |    |    |     |     |     |   |     |     |
|----|------|---------------------|----|----|----|----|----|----|-----|-----|-----|---|-----|-----|
|    |      |                     | 1  | 5  |    | 8  | 4  | 3  | 072 |     | 40  | n | 08  | 74  |
|    |      |                     |    |    |    |    |    |    |     |     | 72  |   | 84  | 04  |
| 57 | PTK  | Protein tyrosine    | 3. | 4. | 3. | 6. | 4. | 4. | 2.6 | 1.4 | 2.6 | U | 0.0 | 0.6 |
| 54 | 7    | kinase 7 (inactive) | 99 | 49 | 87 | 68 | 95 | 93 | 432 | 023 | 43  | p | 21  | 63  |
|    |      |                     | 34 | 01 | 64 | 07 | 32 | 31 | 996 | 4   | 29  |   | 57  | 32  |
|    |      |                     |    | 9  | 6  | 4  | 1  | 2  | 84  |     | 96  |   | 94  | 74  |
|    |      |                     |    |    |    |    |    |    |     |     | 84  |   | 24  | 04  |
| 56 | PRSS | Protease, serine 8  | 11 | 10 | 10 | 9. | 9. | 10 | -2. | -1. | 2.2 | D | 0.0 | 0.6 |
| 52 | 8    |                     | .1 | .9 | .4 | 02 | 74 | .2 | 261 | 177 | 61  | o | 09  | 63  |
|    |      |                     | 60 | 32 | 14 | 53 | 13 | 09 | 541 | 306 | 54  | w | 84  | 32  |
|    |      |                     | 83 | 85 | 71 |    | 1  | 86 | 808 | 667 | 18  | n | 79  | 74  |
|    |      |                     |    |    |    |    |    |    |     |     | 08  |   | 11  | 04  |
| 11 | CFA  | Cilia and flagella  | 6. | 5. | 6. | 4. | 4. | 5. | -2. | -1. | 2.6 | D | 0.0 | 0.6 |
| 84 | P70  | associated protein  | 70 | 80 | 55 | 48 | 70 | 73 | 604 | 380 | 04  | o | 08  | 63  |
| 91 | 70   |                     | 92 | 00 | 15 | 25 | 37 | 23 | 067 | 766 | 06  | w | 83  | 32  |
|    |      |                     | 7  | 3  | 9  | 4  | 3  | 2  | 178 | 667 | 71  | n | 90  | 74  |
|    |      |                     |    |    |    |    |    |    |     |     | 78  |   | 36  | 04  |
| 54 | NEU  | Neuralized E3       | 5. | 6. | 6. | 8. | 8. | 7. | 3.8 | 1.9 | 3.8 | U | 0.0 | 0.6 |
| 49 | RL1  | ubiquitin protein   | 15 | 80 | 33 | 69 | 31 | 12 | 487 | 443 | 48  | p | 08  | 63  |
| 2  | B    | ligase 1B           | 55 | 94 | 36 | 33 | 80 | 03 | 056 | 733 | 70  |   | 26  | 32  |
|    |      |                     | 5  | 2  | 5  | 9  | 4  | 1  | 38  | 33  | 56  |   | 38  | 74  |
|    |      |                     |    |    |    |    |    |    |     |     | 38  |   | 79  | 04  |
| 11 | RWD  | RWD domain          | 6. | 6. | 6. | 6. | 5. | 6. | -1. | -0. | 1.6 | D | 0.0 | 0.6 |
| 26 | D2A  | containing 2A       | 90 | 27 | 87 | 01 | 78 | 11 | 642 | 715 | 42  | o | 14  | 63  |
| 11 |      |                     | 71 | 70 | 30 | 21 | 19 | 65 | 139 | 576 | 13  | w | 20  | 32  |
|    |      |                     |    | 8  | 8  | 1  | 1  | 1  | 474 | 667 | 94  | n | 17  | 74  |
|    |      |                     |    |    |    |    |    |    |     |     | 74  |   | 55  | 04  |
| 93 | SLC9 | Solute carrier      | 11 | 10 | 10 | 9. | 10 | 10 | -1. | -0. | 1.8 | D | 0.0 | 0.6 |
| 68 | A3R  | family 9, subfamily | .2 | .9 | .9 | 38 | .3 | .7 | 801 | 848 | 01  | o | 43  | 63  |



|                |                   |                                                                        |                     |                     |                     |                     |                     |                     |                         |                            |                             |                  |                             |                             |
|----------------|-------------------|------------------------------------------------------------------------|---------------------|---------------------|---------------------|---------------------|---------------------|---------------------|-------------------------|----------------------------|-----------------------------|------------------|-----------------------------|-----------------------------|
|                | 1                 | A (NHE3, cation proton antiporter 3), member 3 regulator 1             | 25<br>51            | 05<br>69            | 05<br>69            | 27<br>2             | 29<br>44            | 78<br>32            | 006<br>432              | 803<br>333                 | 00<br>64<br>32              | w<br>n           | 91<br>69<br>1               | 32<br>74<br>04              |
| 33<br>99       | ID3               | Inhibitor of DNA binding 3, dominant negative helix-loop-helix protein | 5.<br>24<br>54<br>8 | 5.<br>21<br>87<br>6 | 4.<br>94<br>00<br>3 | 8.<br>07<br>54<br>9 | 8.<br>03<br>25<br>9 | 6.<br>91<br>18<br>3 | 5.8<br>099<br>134<br>28 | 2.5<br>385<br>166<br>67    | 5.8<br>09<br>91<br>34<br>28 | U<br>p           | 0.0<br>00<br>111<br>35<br>7 | 0.4<br>35<br>11<br>63<br>4  |
| 28<br>89<br>3  | IGK<br>V1D-<br>39 | Immunoglobulin $\kappa$ variable 1D-39                                 | 5.<br>10<br>81<br>6 | 5.<br>31<br>25<br>7 | 4.<br>80<br>69<br>8 | 6.<br>05<br>00<br>9 | 9.<br>17<br>36<br>8 | 8.<br>94<br>53<br>8 | 7.8<br>924<br>871<br>14 | 2.9<br>804<br>8<br>14      | 7.8<br>92<br>48<br>71<br>14 | U<br>p           | 0.0<br>06<br>50<br>31<br>33 | 0.6<br>63<br>32<br>74<br>04 |
| 14<br>34<br>58 | LDL<br>RAD<br>3   | Low density lipoprotein receptor class A domain containing 3           | 5.<br>05<br>26<br>9 | 5.<br>41<br>39<br>4 | 5.<br>03<br>20<br>9 | 7.<br>08<br>29<br>2 | 7.<br>38<br>31<br>1 | 5.<br>54<br>76<br>6 | 2.8<br>382<br>270<br>39 | 1.5<br>049<br>9<br>39      | 2.8<br>38<br>22<br>70<br>39 | U<br>p           | 0.0<br>13<br>67<br>28<br>86 | 0.6<br>63<br>32<br>74<br>04 |
| 11<br>27<br>24 | RDH<br>13         | Retinol dehydrogenase 13 (all-trans/9-cis)                             | 9.<br>32<br>73<br>5 | 9.<br>26<br>26<br>8 | 8.<br>59<br>00<br>8 | 8.<br>11<br>65<br>1 | 8.<br>56<br>50<br>7 | 8.<br>60<br>37<br>3 | -1.<br>549<br>282<br>25 | -0.<br>631<br>6<br>25      | 1.5<br>49<br>28<br>22<br>5  | D<br>o<br>w<br>n | 0.0<br>41<br>01<br>63<br>78 | 0.6<br>63<br>32<br>74<br>04 |
| 14<br>39<br>03 | LAY<br>N          | Layilin                                                                | 3.<br>65<br>37<br>3 | 6.<br>06<br>18<br>8 | 4.<br>07<br>45<br>6 | 7.<br>59<br>53<br>7 | 6.<br>56<br>29<br>5 | 5.<br>88<br>90<br>4 | 4.2<br>448<br>983<br>3  | 2.0<br>857<br>3<br>83<br>3 | 4.2<br>44<br>89<br>83<br>3  | U<br>p           | 0.0<br>19<br>03<br>97<br>69 | 0.6<br>63<br>32<br>74<br>04 |

|    |      |                         |    |    |    |    |    |    |     |     |     |   |     |     |
|----|------|-------------------------|----|----|----|----|----|----|-----|-----|-----|---|-----|-----|
| 32 | APB  | Amyloid $\beta$ (A4)    | 5. | 5. | 5. | 6. | 5. | 5. | 1.7 | 0.8 | 1.7 | U | 0.0 | 0.6 |
| 3  | B2   | precursor               | 09 | 18 | 41 | 58 | 91 | 60 | 468 | 047 | 46  | p | 19  | 63  |
|    |      | protein-binding,        | 50 | 13 | 20 | 37 | 25 | 62 | 027 | 166 | 80  |   | 39  | 32  |
|    |      | family B, member        | 1  |    | 4  | 5  |    | 5  | 01  | 67  | 27  |   | 98  | 74  |
|    |      | 2                       |    |    |    |    |    |    |     |     | 01  |   | 75  | 04  |
| 70 | TGF  | Transforming            | 3. | 3. | 3. | 4. | 4. | 4. | 2.0 | 1.0 | 2.0 | U | 0.0 | 0.6 |
| 43 | B3   | growth factor $\beta$ 3 | 38 | 88 | 50 | 91 | 43 | 48 | 304 | 218 | 30  | p | 01  | 63  |
|    |      |                         | 19 | 16 | 50 | 45 | 88 | 06 | 835 | 233 | 48  |   | 17  | 32  |
|    |      |                         |    | 5  | 7  | 7  | 8  | 4  | 42  | 33  | 35  |   | 98  | 74  |
|    |      |                         |    |    |    |    |    |    |     |     | 42  |   | 61  | 04  |
| 35 | IGK  | Immunoglobulin $\kappa$ | 5. | 4. | 5. | 6. | 9. | 8. | 6.6 | 2.7 | 6.6 | U | 0.0 | 0.6 |
| 25 | V1O  | variable 1/OR1-1        | 42 | 89 | 48 | 01 | 11 | 90 | 900 | 420 | 90  | p | 09  | 63  |
|    | R1-1 | (pseudogene)            | 99 | 86 | 02 | 56 | 58 | 33 | 175 | 1   | 01  |   | 79  | 32  |
|    |      |                         | 9  | 3  | 1  | 4  | 5  | 7  | 71  |     | 75  |   | 54  | 74  |
|    |      |                         |    |    |    |    |    |    |     |     | 71  |   | 34  | 04  |
| 79 | ARH  | Rho guanine             | 7. | 7. | 6. | 6. | 6. | 6. | -1. | -0. | 1.5 | D | 0.0 | 0.6 |
| 84 | GEF  | nucleotide              | 75 | 05 | 95 | 54 | 44 | 87 | 547 | 629 | 47  | o | 42  | 63  |
|    | 5    | exchange factor 5       | 23 | 24 | 19 | 29 | 79 | 70 | 089 | 556 | 08  | w | 87  | 32  |
|    |      |                         | 1  |    | 3  |    | 9  | 8  | 507 | 667 | 95  | n | 63  | 74  |
|    |      |                         |    |    |    |    |    |    |     |     | 07  |   | 89  | 04  |
| 51 | TAF9 | TATA-box binding        | 4. | 4. | 4. | 5. | 4. | 5. | 1.6 | 0.7 | 1.6 | U | 0.0 | 0.6 |
| 61 | B    | protein associated      | 50 | 24 | 75 | 48 | 95 | 16 | 256 | 010 | 25  | p | 11  | 63  |
| 6  |      | factor 9b               | 45 | 06 | 43 | 55 | 16 | 54 | 612 | 266 | 66  |   | 04  | 32  |
|    |      |                         | 4  | 6  | 6  | 9  |    | 5  | 52  | 67  | 12  |   | 90  | 74  |
|    |      |                         |    |    |    |    |    |    |     |     | 52  |   | 49  | 04  |
| 37 | ITPR | Inositol                | 4. | 7. | 6. | 8. | 7. | 7. | 3.3 | 1.7 | 3.3 | U | 0.0 | 0.6 |
| 08 | 1    | 1,4,5-trisphosphate     | 93 | 04 | 02 | 64 | 20 | 34 | 221 | 320 | 22  | p | 22  | 63  |
|    |      | receptor, type 1        | 59 | 62 | 09 | 32 | 73 | 88 | 026 | 966 | 10  |   | 05  | 32  |
|    |      |                         | 7  | 7  | 4  | 4  | 6  | 7  | 84  | 67  | 26  |   | 97  | 74  |

|    |      |                         |    |    |    |    |    |    |     |     |     |    |     |     |    |
|----|------|-------------------------|----|----|----|----|----|----|-----|-----|-----|----|-----|-----|----|
|    |      |                         |    |    |    |    |    |    |     |     |     | 84 |     | 96  | 04 |
| 14 | SAM  | Sterile $\alpha$ motif  | 6. | 6. | 6. | 7. | 7. | 6. | 1.7 | 0.8 | 1.7 | U  | 0.0 | 0.6 |    |
| 83 | D11  | domain containing       | 12 | 82 | 44 | 88 | 11 | 93 | 964 | 451 | 96  | p  | 26  | 63  |    |
| 98 |      | 11                      | 42 | 06 | 51 | 02 | 07 | 44 | 764 | 7   | 47  |    | 09  | 32  |    |
|    |      |                         | 9  |    | 2  | 8  | 8  | 6  | 21  |     | 64  |    | 47  | 74  |    |
|    |      |                         |    |    |    |    |    |    |     |     | 21  |    | 07  | 04  |    |
| 84 | ANT  | Anthrax toxin           | 4. | 8. | 6. | 10 | 8. | 8. | 4.7 | 2.2 | 4.7 | U  | 0.0 | 0.6 |    |
| 16 | XR1  | receptor 1              | 76 | 07 | 71 | .0 | 07 | 11 | 352 | 434 | 35  | p  | 40  | 63  |    |
| 8  |      |                         | 06 | 88 | 07 | 96 | 39 | 01 | 152 | 3   | 21  |    | 66  | 32  |    |
|    |      |                         |    | 3  |    | 35 | 7  |    | 23  |     | 52  |    | 08  | 74  |    |
|    |      |                         |    |    |    |    |    |    |     |     | 23  |    | 59  | 04  |    |
| 65 | SLC2 | Solute carrier          | 6. | 6. | 7. | 5. | 6. | 6. | -1. | -0. | 1.6 | D  | 0.0 | 0.6 |    |
| 81 | 2A3  | family 22 (organic      | 99 | 64 | 04 | 51 | 26 | 62 | 691 | 758 | 91  | o  | 39  | 63  |    |
|    |      | cation transporter),    | 62 | 10 | 69 | 06 | 93 | 82 | 848 | 6   | 84  | w  | 69  | 32  |    |
|    |      | member 3                | 2  | 4  |    | 9  | 8  | 9  | 048 |     | 80  | n  | 13  | 74  |    |
|    |      |                         |    |    |    |    |    |    |     |     | 48  |    | 86  | 04  |    |
| 78 | TUB  | Tubulin, $\alpha$ 1a    | 8. | 10 | 9. | 11 | 10 | 10 | 2.8 | 1.5 | 2.8 | U  | 0.0 | 0.6 |    |
| 46 | A1A  |                         | 31 | .2 | 13 | .4 | .6 | .1 | 965 | 343 | 96  | p  | 20  | 63  |    |
|    |      |                         | 38 | 17 | 98 | 30 | 49 | 94 | 588 | 4   | 55  |    | 44  | 32  |    |
|    |      |                         | 7  | 72 | 9  | 32 | 97 | 21 | 96  |     | 88  |    | 35  | 74  |    |
|    |      |                         |    |    |    |    |    |    |     |     | 96  |    | 08  | 04  |    |
| 28 | IGK  | Immunoglobulin $\kappa$ | 2. | 3. | 3. | 3. | 7. | 5. | 4.7 | 2.2 | 4.7 | U  | 0.0 | 0.6 |    |
| 87 | V3D- | variable 3D-20          | 96 | 44 | 50 | 70 | 00 | 93 | 439 | 460 | 43  | p  | 20  | 63  |    |
| 4  | 20   |                         | 15 | 17 | 44 | 34 | 72 | 52 | 648 | 933 | 96  |    | 64  | 32  |    |
|    |      |                         | 1  | 2  | 4  | 7  | 6  | 2  | 93  | 33  | 48  |    | 83  | 74  |    |
|    |      |                         |    |    |    |    |    |    |     |     | 93  |    | 96  | 04  |    |
| 44 | MSN  | Moesin                  | 6. | 7. | 7. | 9. | 8. | 7. | 2.4 | 1.2 | 2.4 | U  | 0.0 | 0.6 |    |
| 78 |      |                         | 61 | 39 | 68 | 10 | 64 | 82 | 495 | 925 | 49  | p  | 13  | 63  |    |
|    |      |                         | 08 | 49 | 92 | 67 | 13 | 45 | 894 | 4   | 58  |    | 98  | 32  |    |

|    |      |                         |    |    |    |    |    |    |     |     |     |   |     |     |
|----|------|-------------------------|----|----|----|----|----|----|-----|-----|-----|---|-----|-----|
|    |      |                         | 2  | 8  | 8  | 4  | 9  | 7  | 93  |     | 94  |   | 59  | 74  |
|    |      |                         |    |    |    |    |    |    |     |     | 93  |   | 06  | 04  |
| 27 | LAM  | Lysosomal-associat      | 4. | 4. | 4. | 5. | 5. | 4. | 1.7 | 0.7 | 1.7 | U | 0.0 | 0.6 |
| 07 | P3   | ed membrane             | 02 | 01 | 37 | 45 | 00 | 26 | 047 | 695 | 04  | p | 38  | 63  |
| 4  |      | protein 3               | 13 | 37 | 47 | 45 | 35 | 04 | 497 | 6   | 74  |   | 14  | 32  |
|    |      |                         |    | 9  | 8  | 2  | 5  | 8  | 82  |     | 97  |   | 73  | 74  |
|    |      |                         |    |    |    |    |    |    |     |     | 82  |   | 84  | 04  |
| 10 | LOC  | Uncharacterized         | 9. | 9. | 8. | 8. | 8. | 8. | -1. | -0. | 1.7 | D | 0.0 | 0.6 |
| 02 | 1002 | LOC100287175            | 58 | 31 | 65 | 14 | 00 | 97 | 753 | 810 | 53  | o | 47  | 63  |
| 87 | 8717 |                         | 04 | 67 | 10 | 05 | 28 | 48 | 235 | 02  | 23  | w | 80  | 32  |
| 17 | 5    |                         | 6  | 6  | 4  | 5  | 4  | 1  | 747 |     | 57  | n | 00  | 74  |
| 5  |      |                         |    |    |    |    |    |    |     |     | 47  |   | 75  | 04  |
| 65 | SLC2 | Solute carrier          | 6. | 6. | 6. | 4. | 5. | 6. | -2. | -1. | 2.2 | D | 0.0 | 0.6 |
| 80 | 2A1  | family 22 (organic      | 74 | 52 | 61 | 66 | 43 | 31 | 228 | 156 | 28  | o | 20  | 63  |
|    |      | cation transporter),    | 75 | 66 | 04 | 98 | 00 | 58 | 845 | 296 | 84  | w | 46  | 32  |
|    |      | member 1                | 8  | 3  | 6  | 9  | 4  | 5  | 58  | 667 | 55  | n | 14  | 74  |
|    |      |                         |    |    |    |    |    |    |     |     | 8   |   | 18  | 04  |
| 48 | ATP1 | Atpase, Na+/K+          | 4. | 4. | 4. | 5. | 5. | 4. | 1.5 | 0.6 | 1.5 | U | 0.0 | 0.6 |
| 2  | B2   | transporting, $\beta$ 2 | 37 | 22 | 37 | 01 | 09 | 68 | 232 | 071 | 23  | p | 06  | 63  |
|    |      | polypeptide             | 24 | 65 | 24 | 32 | 62 | 33 | 435 | 466 | 24  |   | 32  | 32  |
|    |      |                         | 7  | 4  | 7  | 6  | 7  | 9  | 87  | 67  | 35  |   | 61  | 74  |
|    |      |                         |    |    |    |    |    |    |     |     | 87  |   | 29  | 04  |
| 34 | CLE  | C-type lectin           | 6. | 6. | 6. | 4. | 5. | 5. | -2. | -1. | 2.1 | D | 0.0 | 0.6 |
| 81 | C18  | domain family 18,       | 87 | 64 | 15 | 97 | 72 | 75 | 110 | 077 | 10  | o | 07  | 63  |
| 74 | A    | member A                | 89 | 41 | 82 | 01 | 35 | 50 | 439 | 543 | 43  | w | 09  | 32  |
|    |      |                         | 9  | 8  |    | 8  | 3  | 3  | 297 | 333 | 92  | n | 44  | 74  |
|    |      |                         |    |    |    |    |    |    |     |     | 97  |   | 89  | 04  |
| 96 | CD4  | CD44 molecule           | 5. | 4. | 5. | 7. | 7. | 4. | 3.1 | 1.6 | 3.1 | U | 0.0 | 0.6 |
| 0  | 4    | (Indian blood           | 11 | 71 | 00 | 39 | 39 | 95 | 061 | 351 | 06  | p | 37  | 63  |

|    |      |                           |    |    |    |    |    |    |     |     |     |   |     |     |
|----|------|---------------------------|----|----|----|----|----|----|-----|-----|-----|---|-----|-----|
|    |      | group)                    | 94 | 20 | 93 | 98 | 43 | 20 | 266 | 166 | 12  |   | 16  | 32  |
|    |      |                           | 7  | 9  | 9  | 2  | 9  | 9  | 74  | 67  | 66  |   | 86  | 74  |
|    |      |                           |    |    |    |    |    |    |     |     | 74  |   | 41  | 04  |
| 10 | ARL  | ADP ribosylation          | 9. | 8. | 9. | 9. | 9. | 9. | 1.5 | 0.6 | 1.5 | U | 0.0 | 0.6 |
| 55 | 6IP5 | factor like gtpase 6      | 04 | 83 | 07 | 76 | 50 | 57 | 501 | 324 | 50  | p | 04  | 63  |
| 0  |      | interacting protein       | 44 | 66 | 20 | 83 | 81 | 40 | 988 | 533 | 19  |   | 90  | 32  |
|    |      | 5                         | 9  | 9  | 1  | 9  | 1  | 5  | 99  | 33  | 88  |   | 56  | 74  |
|    |      |                           |    |    |    |    |    |    |     |     | 99  |   | 45  | 04  |
| 64 | MT1I | Metallothionein 1I,       | 6. | 6. | 6. | 5. | 5. | 6. | -1. | -0. | 1.5 | D | 0.0 | 0.6 |
| 43 | P    | pseudogene                | 51 | 46 | 62 | 43 | 87 | 27 | 592 | 670 | 92  | o | 23  | 63  |
| 14 |      |                           | 29 | 20 | 71 | 70 | 64 | 59 | 069 | 903 | 06  | w | 43  | 32  |
|    |      |                           | 8  | 6  | 4  | 9  | 5  | 3  | 519 | 333 | 95  | n | 69  | 74  |
|    |      |                           |    |    |    |    |    |    |     |     | 19  |   | 9   | 04  |
| 35 | IGH  | Immunoglobulin            | 6. | 7. | 6. | 7. | 10 | 8. | 3.5 | 1.8 | 3.5 | U | 0.0 | 0.6 |
| 02 | G3   | heavy constant $\gamma$ 3 | 96 | 48 | 70 | 76 | .3 | 63 | 999 | 479 | 99  | p | 18  | 63  |
|    |      | (G3m marker)              | 97 | 78 | 47 | 40 | 05 | 67 | 910 | 933 | 99  |   | 41  | 32  |
|    |      |                           | 1  | 7  | 9  | 2  | 54 | 9  | 84  | 33  | 10  |   | 96  | 74  |
|    |      |                           |    |    |    |    |    |    |     |     | 84  |   | 03  | 04  |
| 81 | MAD  | Mucosal vascular          | 5. | 6. | 5. | 6. | 8. | 6. | 2.9 | 1.5 | 2.9 | U | 0.0 | 0.6 |
| 74 | CAM  | addressin cell            | 42 | 35 | 22 | 97 | 39 | 24 | 038 | 379 | 03  | p | 29  | 63  |
|    | 1    | adhesion molecule         | 64 | 69 | 76 | 90 | 93 | 64 | 025 | 433 | 80  |   | 08  | 32  |
|    |      | 1                         | 5  | 3  | 6  | 6  | 9  | 2  | 01  | 33  | 25  |   | 76  | 74  |
|    |      |                           |    |    |    |    |    |    |     |     | 01  |   | 89  | 04  |
| 79 | MM   | Multimerin 2              | 4. | 5. | 5. | 6. | 7. | 5. | 2.4 | 1.3 | 2.4 | U | 0.0 | 0.6 |
| 81 | RN2  |                           | 52 | 13 | 27 | 60 | 17 | 08 | 782 | 093 | 78  | p | 39  | 63  |
| 2  |      |                           | 22 | 42 | 34 | 16 | 20 | 42 | 183 | 033 | 21  |   | 82  | 32  |
|    |      |                           | 9  | 6  | 6  | 4  | 3  | 5  | 98  | 33  | 83  |   | 71  | 74  |
|    |      |                           |    |    |    |    |    |    |     |     | 98  |   | 51  | 04  |
| 48 | NOS  | Nitric oxide              | 3. | 4. | 4. | 5. | 6. | 4. | 2.2 | 1.1 | 2.2 | U | 0.0 | 0.6 |

|    |       |                      |    |    |    |    |    |    |     |     |     |   |     |     |
|----|-------|----------------------|----|----|----|----|----|----|-----|-----|-----|---|-----|-----|
| 46 | 3     | synthase 3           | 92 | 16 | 17 | 42 | 11 | 18 | 202 | 507 | 20  | p | 36  | 63  |
|    |       |                      | 41 | 78 | 83 | 18 | 15 | 91 | 518 | 233 | 25  |   | 44  | 32  |
|    |       |                      | 5  | 3  | 4  | 2  | 6  | 1  | 47  | 33  | 18  |   | 45  | 74  |
|    |       |                      |    |    |    |    |    |    |     |     | 47  |   | 61  | 04  |
| 14 | TTC   | Tetratricopeptide    | 4. | 5. | 5. | 6. | 6. | 5. | 2.0 | 1.0 | 2.0 | U | 0.0 | 0.6 |
| 55 | 7B    | repeat domain 7B     | 71 | 69 | 24 | 74 | 28 | 69 | 328 | 235 | 32  | p | 20  | 63  |
| 67 |       |                      | 01 | 55 | 45 | 50 | 57 | 00 | 634 | 133 | 86  |   | 52  | 32  |
|    |       |                      | 7  | 2  | 7  | 3  | 2  | 5  | 82  | 33  | 34  |   | 97  | 74  |
|    |       |                      |    |    |    |    |    |    |     |     | 82  |   | 82  | 04  |
| 72 | INS-I | INS-IGF2             | 6. | 6. | 7. | 8. | 8. | 7. | 2.3 | 1.2 | 2.3 | U | 0.0 | 0.6 |
| 39 | GF2   | readthrough          | 76 | 86 | 33 | 62 | 74 | 23 | 133 | 1   | 13  | p | 21  | 63  |
| 61 |       |                      | 55 | 78 | 06 | 01 | 29 | 09 | 763 |     | 37  |   | 90  | 32  |
|    |       |                      | 2  | 1  | 6  | 2  | 7  |    | 68  |     | 63  |   | 93  | 74  |
|    |       |                      |    |    |    |    |    |    |     |     | 68  |   | 35  | 04  |
| 23 | COB   | Cordon-bleu WH2      | 7. | 6. | 7. | 5. | 5. | 6. | -2. | -1. | 2.4 | D | 0.0 | 0.6 |
| 24 | L     | repeat protein       | 19 | 87 | 04 | 44 | 35 | 45 | 445 | 290 | 45  | o | 04  | 63  |
| 2  |       |                      | 92 | 33 | 57 | 59 | 07 | 07 | 800 | 306 | 80  | w | 08  | 32  |
|    |       |                      | 3  | 4  | 7  | 8  |    | 4  | 392 | 667 | 03  | n | 95  | 74  |
|    |       |                      |    |    |    |    |    |    |     |     | 92  |   | 19  | 04  |
| 29 | GST   | Glutathione          | 6. | 6. | 5. | 5. | 5. | 5. | -1. | -0. | 1.9 | D | 0.0 | 0.6 |
| 54 | Z1    | S-transferase zeta 1 | 54 | 71 | 98 | 26 | 47 | 60 | 956 | 968 | 56  | o | 03  | 63  |
|    |       |                      | 93 | 37 | 72 | 73 | 30 | 54 | 384 | 19  | 38  | w | 81  | 32  |
|    |       |                      | 5  |    | 8  | 1  | 5  |    | 582 |     | 45  | n | 68  | 74  |
|    |       |                      |    |    |    |    |    |    |     |     | 82  |   | 36  | 04  |
| 39 | LIPA  | Lipase A,            | 6. | 5. | 5. | 6. | 6. | 6. | 1.9 | 0.9 | 1.9 | U | 0.0 | 0.6 |
| 88 |       | lysosomal acid,      | 14 | 42 | 78 | 81 | 59 | 94 | 971 | 979 | 97  | p | 02  | 63  |
|    |       | cholesterol esterase | 44 | 53 | 66 | 94 | 01 | 06 | 693 | 566 | 16  |   | 89  | 32  |
|    |       |                      | 2  | 2  | 7  | 9  | 4  | 5  | 44  | 67  | 93  |   | 66  | 74  |
|    |       |                      |    |    |    |    |    |    |     |     | 44  |   | 18  | 04  |

|    |      |                      |    |    |    |    |    |    |     |     |     |   |     |     |
|----|------|----------------------|----|----|----|----|----|----|-----|-----|-----|---|-----|-----|
| 11 | ABC  | ATP binding          | 6. | 6. | 6. | 5. | 5. | 5. | -1. | -0. | 1.6 | D | 0.0 | 0.6 |
| 19 | B8   | cassette subfamily   | 06 | 36 | 15 | 29 | 31 | 94 | 601 | 679 | 01  | o | 18  | 63  |
| 4  |      | B member 8           | 90 | 25 | 93 | 60 | 01 | 77 | 055 | 023 | 05  | w | 51  | 32  |
|    |      |                      | 4  |    | 7  | 1  | 1  | 2  | 516 | 333 | 55  | n | 46  | 74  |
|    |      |                      |    |    |    |    |    |    |     |     | 16  |   | 88  | 04  |
| 39 | LIFR | Leukemia             | 4. | 4. | 4. | 5. | 6. | 4. | 2.2 | 1.1 | 2.2 | U | 0.0 | 0.6 |
| 77 |      | inhibitory factor    | 89 | 41 | 56 | 87 | 75 | 70 | 261 | 545 | 26  | p | 46  | 63  |
|    |      | receptor $\alpha$    | 32 | 56 | 78 | 73 | 55 | 76 | 744 | 666 | 17  |   | 59  | 32  |
|    |      |                      | 8  | 3  | 6  | 2  | 3  | 2  | 74  | 67  | 44  |   | 66  | 74  |
|    |      |                      |    |    |    |    |    |    |     |     | 74  |   | 43  | 04  |
| 25 | SNE  | Sushi, nidogen and   | 3. | 4. | 4. | 4. | 5. | 4. | 2.0 | 1.0 | 2.0 | U | 0.0 | 0.6 |
| 99 | D1   | EGF-like domains     | 49 | 26 | 06 | 96 | 63 | 28 | 286 | 204 | 28  | p | 25  | 63  |
| 2  |      | 1                    | 93 | 07 | 25 | 66 | 14 | 59 | 031 | 866 | 60  |   | 09  | 32  |
|    |      |                      | 5  | 7  | 7  | 9  | 8  | 8  | 56  | 67  | 31  |   | 13  | 74  |
|    |      |                      |    |    |    |    |    |    |     |     | 56  |   | 76  | 04  |
| 27 | AMY  | Amylase, $\alpha$ 1B | 8. | 8. | 8. | 7. | 7. | 8. | -1. | -0. | 1.6 | D | 0.0 | 0.6 |
| 7  | 1B   | (salivary)           | 63 | 58 | 49 | 49 | 82 | 12 | 695 | 761 | 95  | o | 06  | 63  |
|    |      |                      | 92 | 12 | 99 | 12 | 35 | 14 | 126 | 393 | 12  | w | 00  | 32  |
|    |      |                      | 8  | 6  | 3  | 9  | 6  | 4  | 963 | 333 | 69  | n | 48  | 74  |
|    |      |                      |    |    |    |    |    |    |     |     | 63  |   | 73  | 04  |
| 98 | SEPT | Septin 7             | 6. | 5. | 6. | 7. | 6. | 6. | 1.6 | 0.7 | 1.6 | U | 0.0 | 0.6 |
| 9  | 7    |                      | 05 | 79 | 09 | 09 | 39 | 57 | 290 | 040 | 29  | p | 15  | 63  |
|    |      |                      | 66 | 35 | 39 | 15 | 13 | 35 | 904 | 666 | 09  |   | 78  | 32  |
|    |      |                      | 9  | 9  | 4  | 2  | 4  | 6  | 04  | 67  | 04  |   | 82  | 74  |
|    |      |                      |    |    |    |    |    |    |     |     | 04  |   | 56  | 04  |
| 28 | PDX  | Pyridoxal-depende    | 5. | 5. | 5. | 6. | 5. | 6. | 1.6 | 0.7 | 1.6 | U | 0.0 | 0.6 |
| 39 | DC2  | nt decarboxylase     | 40 | 29 | 91 | 56 | 68 | 53 | 480 | 207 | 48  | p | 44  | 63  |
| 70 | P    | domain containing    | 27 | 94 | 79 | 33 | 66 | 25 | 309 | 433 | 03  |   | 35  | 32  |
|    |      | 2, pseudogene        | 7  | 9  | 9  | 4  | 3  | 1  | 46  | 33  | 09  |   | 87  | 74  |

|                |              |                                                                         |                     |                     |                     |                     |                     |                     |                         |                         |                             |        |                             |                             |
|----------------|--------------|-------------------------------------------------------------------------|---------------------|---------------------|---------------------|---------------------|---------------------|---------------------|-------------------------|-------------------------|-----------------------------|--------|-----------------------------|-----------------------------|
|                |              |                                                                         |                     |                     |                     |                     |                     |                     |                         |                         | 46                          |        |                             | 04                          |
| 86<br>11       | PLPP<br>1    | Phospholipid<br>phosphatase 1                                           | 7.<br>40<br>41<br>3 | 7.<br>71<br>33<br>8 | 7.<br>60<br>49<br>8 | 9.<br>09<br>12<br>6 | 8.<br>62<br>13<br>2 | 8.<br>46<br>05<br>3 | 2.2<br>194<br>978<br>84 | 1.1<br>502<br>333<br>33 | 2.2<br>19<br>49<br>78<br>84 | U<br>p | 0.0<br>00<br>90<br>14<br>67 | 0.6<br>63<br>32<br>74<br>04 |
| 80<br>76<br>0  | ITIH<br>5    | Inter- $\alpha$ -trypsin<br>inhibitor heavy<br>chain family<br>member 5 | 4.<br>92<br>59<br>9 | 6.<br>41<br>78<br>4 | 5.<br>00<br>68<br>2 | 7.<br>29<br>43<br>3 | 6.<br>36<br>02<br>2 | 6.<br>30<br>22<br>9 | 2.3<br>006<br>847<br>83 | 1.2<br>020<br>633<br>33 | 2.3<br>00<br>68<br>47<br>83 | U<br>p | 0.0<br>34<br>79<br>12<br>02 | 0.6<br>63<br>32<br>74<br>04 |
| 22<br>47       | FGF2         | Fibroblast growth<br>factor 2 (basic)                                   | 2.<br>81<br>25<br>9 | 3.<br>52<br>82<br>6 | 3.<br>12<br>15<br>1 | 4.<br>75<br>36<br>4 | 4.<br>05<br>60<br>3 | 3.<br>60<br>29<br>9 | 1.9<br>771<br>650<br>83 | 0.9<br>834<br>333<br>33 | 1.9<br>77<br>16<br>50<br>83 | U<br>p | 0.0<br>16<br>29<br>96<br>29 | 0.6<br>63<br>32<br>74<br>04 |
| 15<br>15<br>56 | GPR<br>155   | G protein-coupled<br>receptor 155                                       | 5.<br>34<br>21<br>5 | 5.<br>71<br>05<br>6 | 5.<br>11<br>90<br>6 | 7.<br>40<br>56<br>4 | 6.<br>20<br>43<br>7 | 5.<br>68<br>40<br>6 | 2.0<br>573<br>491<br>7  | 1.0<br>407<br>866<br>67 | 2.0<br>57<br>34<br>91<br>7  | U<br>p | 0.0<br>45<br>67<br>23<br>99 | 0.6<br>63<br>32<br>74<br>04 |
| 28<br>82<br>4  | IGLV<br>1-41 | Immunoglobulin<br>lambda variable<br>1-41 (pseudogene)                  | 5.<br>07<br>23<br>8 | 4.<br>98<br>42<br>5 | 5.<br>12<br>46<br>1 | 5.<br>37<br>98<br>6 | 6.<br>83<br>04<br>2 | 7.<br>06<br>93<br>7 | 2.5<br>777<br>934<br>44 | 1.3<br>661<br>366<br>67 | 2.5<br>77<br>79<br>34<br>44 | U<br>p | 0.0<br>14<br>36<br>23<br>89 | 0.6<br>63<br>32<br>74<br>04 |
| 10<br>36       | CDO<br>1     | Cysteine<br>dioxygenase type 1                                          | 4.<br>28<br>11      | 5.<br>44<br>08      | 4.<br>99<br>90      | 7.<br>08<br>09      | 6.<br>22<br>69      | 5.<br>74<br>67      | 2.7<br>217<br>036       | 1.4<br>445<br>1         | 2.7<br>21<br>70             | U<br>p | 0.0<br>09<br>97             | 0.6<br>63<br>32             |



|    |      |                     |    |    |    |    |    |    |     |     |     |   |     |     |
|----|------|---------------------|----|----|----|----|----|----|-----|-----|-----|---|-----|-----|
|    |      |                     | 6  | 9  | 4  | 7  | 2  | 3  | 71  |     | 36  |   | 69  | 74  |
|    |      |                     |    |    |    |    |    |    |     |     | 71  |   | 41  | 04  |
| 17 | SYN  | Synaptopodin 2      | 4. | 6. | 4. | 8. | 7. | 6. | 5.1 | 2.3 | 5.1 | U | 0.0 | 0.6 |
| 10 | PO2  |                     | 05 | 72 | 79 | 65 | 04 | 96 | 451 | 632 | 45  | p | 15  | 63  |
| 24 |      |                     | 87 | 22 | 73 | 69 | 38 | 72 | 031 |     | 10  |   | 43  | 32  |
|    |      |                     | 8  | 3  | 9  | 4  |    | 6  | 47  |     | 31  |   | 39  | 74  |
|    |      |                     |    |    |    |    |    |    |     |     | 47  |   | 09  | 04  |
| 10 | TSPA | Tetraspanin 5       | 3. | 4. | 3. | 5. | 5. | 3. | 2.6 | 1.3 | 2.6 | U | 0.0 | 0.6 |
| 09 | N5   |                     | 13 | 41 | 61 | 79 | 54 | 96 | 024 | 798 | 02  | p | 34  | 63  |
| 8  |      |                     | 70 | 07 | 35 | 65 | 23 | 21 | 672 | 8   | 46  |   | 96  | 32  |
|    |      |                     | 6  | 8  | 5  | 5  | 1  | 7  | 35  |     | 72  |   | 56  | 74  |
|    |      |                     |    |    |    |    |    |    |     |     | 35  |   | 26  | 04  |
| 54 | FNB  | Formin binding      | 5. | 4. | 4. | 3. | 4. | 4. | -1. | -0. | 1.5 | D | 0.0 | 0.6 |
| 87 | P1L  | protein 1-like      | 32 | 94 | 82 | 87 | 53 | 77 | 558 | 639 | 58  | o | 44  | 63  |
| 4  |      |                     | 68 | 93 | 62 | 63 | 34 | 29 | 231 | 91  | 23  | w | 83  | 32  |
|    |      |                     | 5  | 8  |    |    | 8  | 2  | 949 |     | 19  | n | 38  | 74  |
|    |      |                     |    |    |    |    |    |    |     |     | 49  |   | 66  | 04  |
| 62 | RRA  | Related RAS viral   | 7. | 8. | 8. | 9. | 8. | 8. | 1.6 | 0.6 | 1.6 | U | 0.0 | 0.6 |
| 37 | S    | (r-ras) oncogene    | 69 | 03 | 29 | 19 | 49 | 42 | 203 | 963 | 20  | p | 34  | 63  |
|    |      | homolog             | 04 | 51 | 8  | 18 | 87 | 19 | 925 | 433 | 39  |   | 09  | 32  |
|    |      |                     | 2  |    |    | 3  | 7  | 5  | 23  | 33  | 25  |   | 33  | 74  |
|    |      |                     |    |    |    |    |    |    |     |     | 23  |   | 91  | 04  |
| 40 | CYP  | Cytochrome P450,    | 9. | 9. | 9. | 7. | 8. | 9. | -2. | -1. | 2.3 | D | 0.0 | 0.6 |
| 51 | 4F3  | family 4, subfamily | 82 | 95 | 63 | 67 | 73 | 39 | 306 | 205 | 06  | o | 21  | 63  |
|    |      | F, polypeptide 3    | 64 | 68 | 39 | 32 | 66 | 04 | 416 | 653 | 41  | w | 02  | 32  |
|    |      |                     | 5  | 8  | 5  | 3  | 2  | 7  | 932 | 333 | 69  | n | 86  | 74  |
|    |      |                     |    |    |    |    |    |    |     |     | 32  |   | 49  | 04  |
| 23 | RGL  | Ral guanine         | 3. | 4. | 4. | 5. | 4. | 4. | 1.8 | 0.8 | 1.8 | U | 0.0 | 0.6 |
| 17 | 1    | nucleotide          | 32 | 17 | 38 | 11 | 88 | 53 | 422 | 814 | 42  | p | 21  | 63  |

|                |            |                                                                                    |                     |                     |                     |                     |                     |                     |                          |                             |                             |                  |                             |                             |
|----------------|------------|------------------------------------------------------------------------------------|---------------------|---------------------|---------------------|---------------------|---------------------|---------------------|--------------------------|-----------------------------|-----------------------------|------------------|-----------------------------|-----------------------------|
| 9              |            | dissociation<br>stimulator-like 1                                                  | 42<br>7             | 10<br>7             | 89<br>5             | 56<br>5             | 24<br>3             | 05<br>7             | 301<br>81                | 533<br>33                   | 23<br>01<br>81              |                  | 73<br>25<br>98              | 32<br>74<br>04              |
| 36<br>25       | INH<br>BB  | Inhibin $\beta$ B                                                                  | 5.<br>26<br>01<br>9 | 5.<br>19<br>53<br>9 | 4.<br>74<br>96<br>8 | 6.<br>44<br>79<br>9 | 6.<br>13<br>55<br>5 | 5.<br>52<br>02<br>3 | 1.9<br>536<br>472<br>52  | 0.9<br>661<br>7<br>72<br>52 | 1.9<br>53<br>64<br>72<br>52 | U<br>p           | 0.0<br>09<br>69<br>40<br>38 | 0.6<br>63<br>32<br>74<br>04 |
| 47<br>7        | ATP1<br>A2 | Atpase, Na <sup>+</sup> /K <sup>+</sup><br>transporting, $\alpha$ 2<br>polypeptide | 4.<br>41<br>42<br>1 | 6.<br>17<br>90<br>8 | 5.<br>01<br>26<br>7 | 6.<br>31<br>97<br>8 | 7.<br>55<br>74<br>9 | 6.<br>08<br>23<br>5 | 2.7<br>343<br>918<br>46  | 1.4<br>512<br>2<br>46       | 2.7<br>34<br>39<br>18<br>46 | U<br>p           | 0.0<br>311<br>16<br>05<br>6 | 0.6<br>63<br>32<br>74<br>04 |
| 38<br>22       | KLR<br>C2  | Killer cell<br>lectin-like receptor<br>subfamily C,<br>member 2                    | 4.<br>71<br>45<br>9 | 5.<br>20<br>65<br>8 | 5.<br>70<br>24<br>8 | 4.<br>62<br>74<br>6 | 3.<br>76<br>04<br>8 | 4.<br>40<br>00<br>8 | -1.<br>925<br>469<br>139 | -0.<br>945<br>21<br>139     | 1.9<br>25<br>46<br>91<br>39 | D<br>o<br>w<br>n | 0.0<br>20<br>16<br>58<br>71 | 0.6<br>63<br>32<br>74<br>04 |
| 84<br>36       | SDP<br>R   | Serum deprivation<br>response                                                      | 4.<br>81<br>80<br>6 | 6.<br>82<br>06<br>5 | 5.<br>17<br>57<br>2 | 7.<br>97<br>09<br>5 | 7.<br>38<br>34<br>6 | 7.<br>48<br>44<br>2 | 4.0<br>226<br>140<br>73  | 2.0<br>081<br>333<br>33     | 4.0<br>22<br>61<br>40<br>73 | U<br>p           | 0.0<br>05<br>32<br>60<br>82 | 0.6<br>63<br>32<br>74<br>04 |
| 16<br>66<br>14 | DCL<br>K2  | Doublecortin like<br>kinase 2                                                      | 4.<br>49<br>42      | 5.<br>59<br>06<br>5 | 5.<br>01<br>64<br>3 | 6.<br>90<br>59<br>5 | 5.<br>79<br>37<br>7 | 5.<br>63<br>38<br>3 | 2.1<br>102<br>637<br>63  | 1.0<br>774<br>233<br>33     | 2.1<br>10<br>26<br>37<br>63 | U<br>p           | 0.0<br>33<br>46<br>19<br>95 | 0.6<br>63<br>32<br>74<br>04 |
| 26             | LRR        | Leucine rich repeat                                                                | 5.                  | 6.                  | 5.                  | 8.                  | 7.                  | 6.                  | 3.2                      | 1.6                         | 3.2                         | U                | 0.0                         | 0.6                         |

|               |             |                                                                                |                     |                     |                     |                     |                     |                     |                          |                               |                             |                  |                             |                             |
|---------------|-------------|--------------------------------------------------------------------------------|---------------------|---------------------|---------------------|---------------------|---------------------|---------------------|--------------------------|-------------------------------|-----------------------------|------------------|-----------------------------|-----------------------------|
| 15            | C32         | containing 32                                                                  | 18<br>46<br>3       | 34<br>27<br>4       | 72<br>18            | 71<br>48            | 05<br>7             | 55<br>35<br>7       | 311<br>924<br>2          | 920<br>666<br>67              | 31<br>19<br>24<br>2         | p                | 21<br>00<br>29<br>34        | 63<br>32<br>74<br>04        |
| 29<br>76<br>3 | PAC<br>SIN3 | Protein kinase C<br>and casein kinase<br>substrate in<br>neurons 3             | 4.<br>43<br>97<br>8 | 4.<br>61<br>27<br>9 | 4.<br>44<br>27      | 6.<br>49<br>19<br>5 | 4.<br>87<br>70<br>4 | 5.<br>08<br>55<br>5 | 1.9<br>825<br>033<br>91  | 0.9<br>873<br>233<br>33<br>91 | 1.9<br>82<br>50<br>33       | U<br>p           | 0.0<br>45<br>22<br>13<br>48 | 0.6<br>63<br>32<br>74<br>04 |
| 59<br>34<br>5 | GNB<br>4    | Guanine nucleotide<br>binding protein (G<br>protein), $\beta$<br>polypeptide 4 | 5.<br>87<br>04<br>4 | 6.<br>87<br>00<br>5 | 6.<br>80<br>49<br>2 | 8.<br>59<br>05<br>2 | 8.<br>00<br>63<br>2 | 7.<br>06<br>51<br>6 | 2.5<br>886<br>322<br>04  | 1.3<br>721<br>9<br>04         | 2.5<br>88<br>63<br>22<br>04 | U<br>p           | 0.0<br>16<br>38<br>89<br>68 | 0.6<br>63<br>32<br>74<br>04 |
| 80<br>31<br>8 | GKA<br>P1   | G kinase anchoring<br>protein 1                                                | 6.<br>41<br>32<br>1 | 6.<br>34<br>84<br>6 | 6.<br>20<br>58<br>4 | 5.<br>12<br>83<br>2 | 5.<br>72<br>06<br>3 | 5.<br>89<br>70<br>3 | -1.<br>670<br>766<br>359 | -0.<br>740<br>51<br>63<br>59  | 1.6<br>70<br>76<br>63<br>59 | D<br>o<br>w<br>n | 0.0<br>14<br>06<br>63<br>13 | 0.6<br>63<br>32<br>74<br>04 |
| 12<br>72      | CNT<br>N1   | Contactin 1                                                                    | 2.<br>26<br>38<br>4 | 4.<br>71<br>03<br>6 | 2.<br>91<br>31<br>1 | 5.<br>80<br>00<br>6 | 6.<br>36<br>30<br>3 | 4.<br>81<br>62<br>4 | 5.1<br>479<br>807<br>78  | 2.3<br>640<br>066<br>67       | 5.1<br>47<br>98<br>07<br>78 | U<br>p           | 0.0<br>08<br>93<br>19<br>41 | 0.6<br>63<br>32<br>74<br>04 |
| 29<br>96<br>5 | CDIP<br>1   | Cell<br>death-inducing p53<br>target 1                                         | 7.<br>99<br>75<br>7 | 8.<br>09<br>96<br>6 | 7.<br>39<br>68      | 6.<br>76<br>56      | 7.<br>16<br>70<br>8 | 7.<br>37<br>66<br>6 | -1.<br>656<br>605<br>404 | -0.<br>728<br>23              | 1.6<br>56<br>60<br>54<br>04 | D<br>o<br>w<br>n | 0.0<br>24<br>24<br>05<br>23 | 0.6<br>63<br>32<br>74<br>04 |

|                |            |                                                         |                     |                     |                     |                     |                      |                     |                          |                          |                             |                  |                             |                             |
|----------------|------------|---------------------------------------------------------|---------------------|---------------------|---------------------|---------------------|----------------------|---------------------|--------------------------|--------------------------|-----------------------------|------------------|-----------------------------|-----------------------------|
| 93<br>08       | CD8<br>3   | CD83 molecule                                           | 4.<br>18<br>59<br>7 | 4.<br>82<br>62<br>3 | 4.<br>82<br>62<br>3 | 5.<br>33<br>86<br>5 | 5.<br>07<br>78<br>4  | 5.<br>75<br>46<br>3 | 1.7<br>142<br>331<br>4   | 0.7<br>775<br>633<br>33  | 1.7<br>14<br>23<br>31<br>4  | U<br>p           | 0.0<br>18<br>22<br>70<br>45 | 0.6<br>63<br>32<br>74<br>04 |
| 38<br>83<br>72 | CCL<br>4L1 | Chemokine (C-C motif) ligand 4-like 1                   | 5.<br>72<br>31<br>6 | 6.<br>37<br>54<br>2 | 6.<br>64<br>34<br>5 | 6.<br>68<br>61<br>8 | 8.<br>05<br>00<br>2  | 7.<br>55<br>12<br>2 | 2.2<br>685<br>807<br>29  | 1.1<br>817<br>9<br>29    | 2.2<br>68<br>58<br>07<br>29 | U<br>p           | 0.0<br>19<br>15<br>84<br>57 | 0.6<br>63<br>32<br>74<br>04 |
| 35<br>01       | IGH<br>G2  | Immunoglobulin heavy constant $\gamma$ 2 (G2m marker)   | 6.<br>96<br>97<br>1 | 7.<br>48<br>78<br>7 | 6.<br>70<br>47<br>9 | 7.<br>76<br>40<br>2 | 10<br>.3<br>05<br>54 | 8.<br>63<br>67<br>9 | 3.5<br>999<br>910<br>84  | 1.8<br>479<br>933<br>33  | 3.5<br>99<br>99<br>10<br>84 | U<br>p           | 0.0<br>18<br>41<br>96<br>03 | 0.6<br>63<br>32<br>74<br>04 |
| 51<br>24<br>1  | COX<br>16  | COX16 cytochrome c oxidase assembly homolog             | 7.<br>77<br>00<br>8 | 7.<br>45<br>92<br>3 | 7.<br>68<br>22<br>4 | 6.<br>65<br>13<br>4 | 7.<br>02<br>37<br>3  | 7.<br>46<br>87<br>3 | -1.<br>504<br>460<br>957 | -0.<br>589<br>246<br>667 | 1.5<br>04<br>46<br>09<br>57 | D<br>o<br>w<br>n | 0.0<br>41<br>26<br>49<br>22 | 0.6<br>63<br>32<br>74<br>04 |
| 85<br>36<br>0  | SYD<br>E1  | Synapse defective 1, Rho gtpase, homolog 1 (C. Elegans) | 5.<br>21<br>42<br>2 | 6.<br>79<br>17<br>2 | 5.<br>60<br>96<br>5 | 7.<br>58<br>28<br>2 | 7.<br>00<br>48<br>5  | 6.<br>38<br>72<br>8 | 2.1<br>731<br>483<br>55  | 1.1<br>197<br>866<br>67  | 2.1<br>73<br>14<br>83<br>55 | U<br>p           | 0.0<br>46<br>52<br>14<br>95 | 0.6<br>63<br>32<br>74<br>04 |
| 10<br>81<br>0  | WAS<br>F3  | WAS protein family member 3                             | 5.<br>12<br>83<br>2 | 5.<br>97<br>46<br>7 | 6.<br>11<br>87<br>7 | 6.<br>59<br>05<br>5 | 6.<br>53<br>87<br>2  | 6.<br>33<br>08<br>6 | 1.6<br>772<br>797<br>5   | 0.7<br>461<br>233<br>33  | 1.6<br>77<br>27<br>97       | U<br>p           | 0.0<br>31<br>25<br>98       | 0.6<br>63<br>32<br>74       |

|    |      |                     |    |    |    |    |    |    |     |     |     |   |     |     |
|----|------|---------------------|----|----|----|----|----|----|-----|-----|-----|---|-----|-----|
|    |      |                     |    |    |    |    |    |    |     |     | 5   |   | 38  | 04  |
| 22 | FOX  | Forkhead box F2     | 4. | 4. | 4. | 5. | 5. | 5. | 1.9 | 0.9 | 1.9 | U | 0.0 | 0.6 |
| 95 | F2   |                     | 16 | 96 | 37 | 60 | 46 | 28 | 331 | 509 | 33  | p | 04  | 63  |
|    |      |                     | 54 | 73 | 52 | 56 | 57 | 95 | 407 | 466 | 14  |   | 57  | 32  |
|    |      |                     | 8  | 2  | 3  |    | 6  | 1  | 29  | 67  | 07  |   | 55  | 74  |
|    |      |                     |    |    |    |    |    |    |     |     | 29  |   | 52  | 04  |
| 99 | WDR  | WD repeat domain    | 5. | 4. | 5. | 6. | 5. | 6. | 1.6 | 0.7 | 1.6 | U | 0.0 | 0.6 |
| 48 | 1    | 1                   | 52 | 68 | 21 | 05 | 50 | 03 | 526 | 247 | 52  | p | 29  | 63  |
|    |      |                     | 49 | 29 | 98 | 28 | 99 | 91 | 142 | 5   | 61  |   | 64  | 32  |
|    |      |                     | 5  | 5  | 8  | 8  | 7  | 8  | 35  |     | 42  |   | 95  | 74  |
|    |      |                     |    |    |    |    |    |    |     |     | 35  |   | 94  | 04  |
| 71 | TSPA | Tetraspanin 4       | 5. | 6. | 6. | 7. | 7. | 7. | 2.1 | 1.0 | 2.1 | U | 0.0 | 0.6 |
| 06 | N4   |                     | 46 | 82 | 82 | 96 | 21 | 14 | 008 | 709 | 00  | p | 37  | 63  |
|    |      |                     | 82 | 02 | 23 | 63 | 10 | 63 | 793 | 933 | 87  |   | 41  | 32  |
|    |      |                     | 1  | 4  | 8  | 9  | 5  | 7  | 8   | 33  | 93  |   | 39  | 74  |
|    |      |                     |    |    |    |    |    |    |     |     | 8   |   | 18  | 04  |
| 64 | AEN  | Apoptosis           | 8. | 7. | 7. | 6. | 7. | 6. | -1. | -0. | 1.6 | D | 0.0 | 0.6 |
| 78 |      | enhancing nuclease  | 35 | 89 | 39 | 86 | 56 | 92 | 694 | 760 | 94  | o | 40  | 63  |
| 2  |      |                     | 81 | 43 | 25 | 59 | 83 | 79 | 610 | 953 | 61  | w | 48  | 32  |
|    |      |                     | 6  | 2  | 6  |    | 7  | 1  | 054 | 333 | 00  | n | 87  | 74  |
|    |      |                     |    |    |    |    |    |    |     |     | 54  |   | 49  | 04  |
| 11 | GLIP | GLI                 | 4. | 5. | 4. | 6. | 5. | 5. | 2.3 | 1.2 | 2.3 | U | 0.0 | 0.6 |
| 01 | R1   | pathogenesis-relate | 30 | 33 | 61 | 90 | 28 | 70 | 124 | 093 | 12  | p | 31  | 63  |
| 0  |      | d 1                 | 65 | 66 | 67 | 19 | 2  | 42 | 091 | 966 | 40  |   | 91  | 32  |
|    |      |                     | 5  | 9  | 6  | 2  |    | 7  | 19  | 67  | 91  |   | 79  | 74  |
|    |      |                     |    |    |    |    |    |    |     |     | 19  |   | 84  | 04  |
| 14 | CCM  | Cerebral cavernous  | 4. | 5. | 4. | 5. | 5. | 5. | 1.5 | 0.6 | 1.5 | U | 0.0 | 0.6 |
| 07 | 2L   | malformation        | 50 | 14 | 83 | 53 | 72 | 04 | 226 | 065 | 22  | p | 42  | 63  |
| 06 |      | 2-like              | 31 | 07 | 89 | 63 | 60 | 01 | 172 | 533 | 61  |   | 48  | 32  |

|    |      |                      |    |    |    |    |    |    |     |     |     |   |     |     |
|----|------|----------------------|----|----|----|----|----|----|-----|-----|-----|---|-----|-----|
|    |      |                      | 8  | 2  | 6  | 3  | 7  | 2  | 56  | 33  | 72  |   | 93  | 74  |
|    |      |                      |    |    |    |    |    |    |     |     | 56  |   | 46  | 04  |
| 84 | C19o | Chromosome 19        | 5. | 5. | 5. | 4. | 4. | 4. | -1. | -0. | 1.8 | D | 0.0 | 0.6 |
| 16 | rf44 | open reading frame   | 43 | 37 | 27 | 92 | 30 | 29 | 810 | 856 | 10  | o | 04  | 63  |
| 7  |      | 44                   | 15 | 92 | 91 | 36 | 65 | 12 | 222 | 166 | 22  | w | 11  | 32  |
|    |      |                      | 7  |    | 6  | 4  | 5  | 4  | 039 | 667 | 20  | n | 54  | 74  |
|    |      |                      |    |    |    |    |    |    |     |     | 39  |   | 78  | 04  |
| 28 | AMY  | Amylase, $\alpha$ 2B | 8. | 7. | 7. | 6. | 6. | 7. | -1. | -0. | 1.6 | D | 0.0 | 0.6 |
| 0  | 2B   | (pancreatic)         | 01 | 38 | 61 | 45 | 91 | 48 | 650 | 722 | 50  | o | 46  | 63  |
|    |      |                      | 81 | 33 | 35 | 25 | 05 | 41 | 107 | 56  | 10  | w | 37  | 32  |
|    |      |                      | 1  | 3  |    | 5  | 5  | 6  | 483 |     | 74  | n | 38  | 74  |
|    |      |                      |    |    |    |    |    |    |     |     | 83  |   | 05  | 04  |
| 55 | GOL  | Golgin A2            | 5. | 5. | 5. | 4. | 4. | 4. | -1. | -0. | 1.5 | D | 0.0 | 0.6 |
| 59 | GA2  | pseudogene 5         | 49 | 52 | 22 | 50 | 84 | 90 | 581 | 661 | 81  | o | 06  | 63  |
| 2  | P5   |                      | 02 | 17 | 04 | 49 | 31 | 06 | 408 | 21  | 40  | w | 86  | 32  |
|    |      |                      | 5  | 2  | 1  | 4  | 4  | 7  | 408 |     | 84  | n | 44  | 74  |
|    |      |                      |    |    |    |    |    |    |     |     | 08  |   | 65  | 04  |
| 13 | CMB  | Carboxymethylene     | 10 | 10 | 10 | 9. | 9. | 10 | -1. | -0. | 1.7 | D | 0.0 | 0.6 |
| 41 | L    | butenolidase         | .7 | .2 | .9 | 69 | 54 | .4 | 711 | 774 | 111 | o | 30  | 63  |
| 47 |      | homolog              | 48 | 88 | 49 | 16 | 23 | 28 | 103 | 926 | 03  | w | 11  | 32  |
|    |      | (Pseudomonas)        | 7  | 83 | 77 | 9  | 3  | 5  | 072 | 667 | 07  | n | 30  | 74  |
|    |      |                      |    |    |    |    |    |    |     |     | 2   |   | 76  | 04  |
| 43 | MMP  | Matrix               | 8. | 8. | 8. | 6. | 8. | 8. | -2. | -1. | 2.0 | D | 0.0 | 0.6 |
| 24 | 15   | metallopeptidase     | 94 | 81 | 30 | 73 | 08 | 11 | 060 | 043 | 60  | o | 34  | 63  |
|    |      | 15                   | 86 | 03 | 35 | 80 | 01 | 50 | 688 | 126 | 68  | w | 04  | 32  |
|    |      |                      | 5  |    | 7  | 2  |    | 2  | 825 | 667 | 88  | n | 44  | 74  |
|    |      |                      |    |    |    |    |    |    |     |     | 25  |   | 12  | 04  |
| 87 | TNF  | Tumor necrosis       | 10 | 10 | 11 | 10 | 9. | 10 | -1. | -0. | 1.5 | D | 0.0 | 0.6 |
| 41 | SF13 | factor superfamily   | .7 | .3 | .0 | .0 | 86 | .3 | 566 | 647 | 66  | o | 25  | 63  |

|                |                 |                                                                     |                     |                     |                     |                      |                     |                      |                          |                          |                             |                  |                             |                             |
|----------------|-----------------|---------------------------------------------------------------------|---------------------|---------------------|---------------------|----------------------|---------------------|----------------------|--------------------------|--------------------------|-----------------------------|------------------|-----------------------------|-----------------------------|
|                |                 | member 13                                                           | 36<br>66            | 75<br>99            | 80<br>84            | 39<br>84             | 36<br>1             | 48<br>6              | 067<br>793               | 146<br>667               | 06<br>77<br>93              | w<br>n           | 13<br>84<br>39              | 32<br>74<br>04              |
| 40<br>60       | LUM             | Lumican                                                             | 7.<br>53<br>06<br>1 | 9.<br>14<br>27<br>9 | 8.<br>99<br>52<br>9 | 11<br>.2<br>50<br>11 | 10<br>.4<br>95<br>3 | 10<br>.0<br>93<br>85 | 4.1<br>608<br>741<br>89  | 2.0<br>568<br>866<br>67  | 4.1<br>60<br>87<br>41<br>89 | U<br>p           | 0.0<br>03<br>77<br>64<br>94 | 0.6<br>63<br>32<br>74<br>04 |
| 98<br>02       | DAZ<br>AP2      | DAZ associated<br>protein 2                                         | 7.<br>41<br>27<br>2 | 7.<br>07<br>71<br>2 | 7.<br>24<br>59<br>2 | 6.<br>12<br>85<br>7  | 6.<br>57<br>03<br>7 | 6.<br>94<br>25<br>8  | -1.<br>622<br>370<br>51  | -0.<br>698<br>103<br>333 | 1.6<br>22<br>37<br>05<br>1  | D<br>o<br>w<br>n | 0.0<br>21<br>51<br>92<br>46 | 0.6<br>63<br>32<br>74<br>04 |
| 25<br>78<br>0  | RAS<br>GRP<br>3 | RAS guanyl<br>releasing protein 3<br>(calcium and<br>DAG-regulated) | 4.<br>38<br>51<br>4 | 5.<br>13<br>39<br>4 | 4.<br>96<br>77<br>4 | 6.<br>08<br>32<br>5  | 6.<br>08<br>32<br>5 | 4.<br>97<br>46<br>8  | 1.8<br>465<br>256<br>89  | 0.8<br>848<br>133<br>33  | 1.8<br>46<br>52<br>56<br>89 | U<br>p           | 0.0<br>40<br>59<br>87<br>97 | 0.6<br>63<br>32<br>74<br>04 |
| 28<br>53<br>43 | TCAI<br>M       | T cell activation<br>inhibitor,<br>mitochondrial                    | 8.<br>38<br>32      | 8.<br>36<br>53      | 8.<br>80<br>33<br>1 | 6.<br>72<br>01<br>4  | 7.<br>23<br>2<br>4  | 7.<br>93<br>80<br>8  | -2.<br>330<br>323<br>102 | -1.<br>220<br>53<br>102  | 2.3<br>30<br>32<br>31<br>02 | D<br>o<br>w<br>n | 0.0<br>06<br>43<br>87<br>08 | 0.6<br>63<br>32<br>74<br>04 |
| 92<br>67<br>5  | DTD<br>1        | D-tyrosyl-trna<br>deacylase 1                                       | 4.<br>70<br>71<br>2 | 4.<br>98<br>3<br>6  | 5.<br>12<br>04<br>6 | 6.<br>40<br>78<br>4  | 5.<br>44<br>68<br>7 | 5.<br>64<br>16<br>64 | 1.8<br>599<br>235<br>64  | 0.8<br>952<br>433<br>33  | 1.8<br>59<br>92<br>35<br>64 | U<br>p           | 0.0<br>13<br>77<br>91<br>34 | 0.6<br>63<br>32<br>74<br>04 |
| 66             | HNR             | Heterogeneous                                                       | 10                  | 9.                  | 10                  | 11                   | 10                  | 10                   | 1.5                      | 0.6                      | 1.5                         | U                | 0.0                         | 0.6                         |

|    |      |                      |    |    |    |    |    |    |     |     |     |   |     |     |
|----|------|----------------------|----|----|----|----|----|----|-----|-----|-----|---|-----|-----|
| 47 | NPA  | nuclear              | .5 | 84 | .5 | .2 | .7 | .7 | 378 | 208 | 37  | p | 41  | 63  |
| 09 | IP10 | ribonucleoprotein    | 41 | 63 | 54 | 45 | 69 | 90 | 200 | 866 | 82  |   | 12  | 32  |
|    |      | A1 pseudogene 10     | 79 |    | 8  | 93 | 17 | 45 | 2   | 67  | 00  |   | 90  | 74  |
|    |      |                      |    |    |    |    |    |    |     |     | 2   |   | 93  | 04  |
| 67 | SRE  | Sterol regulatory    | 7. | 7. | 7. | 6. | 6. | 6. | -1. | -0. | 1.7 | D | 0.0 | 0.6 |
| 20 | BF1  | element binding      | 55 | 47 | 49 | 61 | 41 | 95 | 797 | 846 | 97  | o | 02  | 63  |
|    |      | transcription factor | 30 | 30 | 16 | 72 | 02 | 10 | 987 | 383 | 98  | w | 43  | 32  |
|    |      | 1                    | 9  | 6  |    | 4  | 8  | 8  | 927 | 333 | 79  | n | 80  | 74  |
|    |      |                      |    |    |    |    |    |    |     |     | 27  |   | 05  | 04  |
| 44 | PAL  | PALM2-AKAP2          | 8. | 8. | 8. | 9. | 8. | 8. | 1.5 | 0.6 | 1.5 | U | 0.0 | 0.6 |
| 58 | M2-  | readthrough          | 27 | 20 | 22 | 33 | 52 | 74 | 544 | 363 | 54  | p | 27  | 63  |
| 15 | AKA  |                      | 71 | 76 | 09 | 92 | 59 | 97 | 382 | 933 | 43  |   | 04  | 32  |
|    | P2   |                      | 8  | 4  | 3  | 2  | 4  | 7  | 79  | 33  | 82  |   | 00  | 74  |
|    |      |                      |    |    |    |    |    |    |     |     | 79  |   | 58  | 04  |
| 16 | TRP  | Transient receptor   | 6. | 6. | 6. | 5. | 5. | 5. | -1. | -0. | 1.7 | D | 0.0 | 0.6 |
| 25 | V3   | potential cation     | 97 | 26 | 33 | 23 | 97 | 85 | 786 | 837 | 86  | o | 20  | 63  |
| 14 |      | channel, subfamily   | 87 | 62 | 07 | 50 | 57 | 38 | 414 | 066 | 41  | w | 35  | 32  |
|    |      | V, member 3          | 1  | 6  | 8  | 1  | 1  | 3  | 253 | 667 | 42  | n | 70  | 74  |
|    |      |                      |    |    |    |    |    |    |     |     | 53  |   | 62  | 04  |
| 57 | TRIB | Tribbles             | 6. | 7. | 6. | 6. | 6. | 5. | -1. | -0. | 1.5 | D | 0.0 | 0.6 |
| 76 | 3    | pseudokinase 3       | 94 | 09 | 64 | 49 | 54 | 70 | 570 | 651 | 70  | o | 44  | 63  |
| 1  |      |                      | 55 | 27 | 96 | 20 | 06 | 21 | 267 | 01  | 26  | w | 66  | 32  |
|    |      |                      | 2  | 1  | 1  | 2  | 9  |    | 122 |     | 71  | n | 54  | 74  |
|    |      |                      |    |    |    |    |    |    |     |     | 22  |   | 87  | 04  |
| 48 | NPM  | Nucleophosmin        | 10 | 9. | 10 | 11 | 10 | 10 | 1.7 | 0.7 | 1.7 | U | 0.0 | 0.6 |
| 69 | 1    | (nucleolar           | .1 | 85 | .3 | .3 | .7 | .5 | 395 | 986 | 39  | p | 12  | 63  |
|    |      | phosphoprotein       | 37 | 45 | 37 | 42 | 86 | 95 | 007 | 733 | 50  |   | 18  | 32  |
|    |      | B23, numatrin)       | 14 | 6  | 39 | 99 | 74 | 38 | 89  | 33  | 07  |   | 47  | 74  |
|    |      |                      |    |    |    |    |    |    |     |     | 89  |   | 46  | 04  |



|               |             |                                                                      |                      |                      |                     |                     |                     |                      |                          |                          |                             |                  |                             |                             |
|---------------|-------------|----------------------------------------------------------------------|----------------------|----------------------|---------------------|---------------------|---------------------|----------------------|--------------------------|--------------------------|-----------------------------|------------------|-----------------------------|-----------------------------|
| 19<br>01      | S1PR<br>1   | Sphingosine-1-phosphate receptor 1                                   | 3.<br>93<br>77<br>5  | 3.<br>90<br>78<br>7  | 4.<br>22<br>13<br>4 | 5.<br>74<br>95<br>4 | 6.<br>64<br>06<br>2 | 4.<br>44<br>64<br>2  | 3.0<br>102<br>291<br>89  | 1.5<br>898<br>733<br>33  | 3.0<br>10<br>22<br>91<br>89 | U<br>p           | 0.0<br>15<br>83<br>34<br>55 | 0.6<br>63<br>32<br>74<br>04 |
| 92<br>20      | TIAF<br>1   | TGFB1-induced anti-apoptotic factor 1                                | 8.<br>99<br>75<br>7  | 9.<br>08<br>04<br>9  | 8.<br>52<br>07<br>8 | 7.<br>13<br>58<br>5 | 8.<br>12<br>67<br>8 | 8.<br>34<br>74<br>9  | -1.<br>994<br>794<br>32  | -0.<br>996<br>24<br>32   | 1.9<br>94<br>79<br>43<br>2  | D<br>o<br>w<br>n | 0.0<br>21<br>75<br>32<br>49 | 0.6<br>63<br>32<br>74<br>04 |
| 74<br>12      | VCA<br>M1   | Vascular cell adhesion molecule 1                                    | 3.<br>25<br>37<br>8  | 3.<br>67<br>32<br>9  | 4.<br>12<br>47<br>7 | 6.<br>02<br>93<br>4 | 5.<br>80<br>43<br>4 | 5.<br>90<br>61<br>3  | 4.6<br>890<br>965<br>99  | 2.2<br>293<br>1<br>99    | 4.6<br>89<br>09<br>65<br>99 | U<br>p           | 2.7<br>59<br>16<br>E-0<br>5 | 0.1<br>34<br>76<br>40<br>92 |
| 63<br>63      | CCL<br>19   | Chemokine (C-C motif) ligand 19                                      | 4.<br>77<br>18<br>6  | 6.<br>41<br>17<br>4  | 5.<br>26<br>75<br>2 | 7.<br>63<br>72<br>4 | 6.<br>54<br>61<br>1 | 6.<br>22<br>50<br>6  | 2.4<br>950<br>983<br>2   | 1.3<br>190<br>966<br>67  | 2.4<br>95<br>09<br>83<br>2  | U<br>p           | 0.0<br>35<br>49<br>85<br>91 | 0.6<br>63<br>32<br>74<br>04 |
| 85<br>01      | SLC4<br>3A1 | Solute carrier family 43 (amino acid system L transporter), member 1 | 10<br>.4<br>74<br>18 | 10<br>.2<br>87<br>79 | 10<br>.2<br>33<br>7 | 8.<br>79<br>62<br>6 | 8.<br>42<br>32<br>2 | 10<br>.3<br>82<br>22 | -2.<br>190<br>595<br>838 | -1.<br>131<br>323<br>333 | 2.1<br>90<br>59<br>58<br>38 | D<br>o<br>w<br>n | 0.0<br>48<br>93<br>62<br>99 | 0.6<br>63<br>32<br>74<br>04 |
| 26<br>47<br>0 | SEZ6<br>L2  | Seizure related 6 homolog (mouse)-like 2                             | 8.<br>38<br>56<br>3  | 8.<br>08<br>49<br>9  | 8.<br>56<br>71<br>1 | 7.<br>14<br>28<br>7 | 7.<br>43<br>61<br>3 | 8.<br>09<br>97<br>2  | -1.<br>724<br>689<br>516 | -0.<br>786<br>336<br>667 | 1.7<br>24<br>68<br>95       | D<br>o<br>w<br>n | 0.0<br>24<br>37<br>56       | 0.6<br>63<br>32<br>74       |

|    |      |                     |    |    |    |    |    |    |     |     |     |   |     |     |
|----|------|---------------------|----|----|----|----|----|----|-----|-----|-----|---|-----|-----|
|    |      |                     |    |    |    |    |    |    |     |     | 16  |   | 57  | 04  |
| 40 | LOX  | Lysyl oxidase       | 3. | 3. | 3. | 4. | 4. | 4. | 1.6 | 0.7 | 1.6 | U | 0.0 | 0.6 |
| 15 |      |                     | 25 | 83 | 67 | 92 | 03 | 02 | 721 | 416 | 72  | p | 32  | 63  |
|    |      |                     | 78 | 58 | 11 | 14 | 89 | 94 | 218 | 8   | 12  |   | 50  | 32  |
|    |      |                     | 2  | 9  | 4  | 9  | 4  | 6  | 7   |     | 18  |   | 30  | 74  |
|    |      |                     |    |    |    |    |    |    |     |     | 7   |   | 06  | 04  |
| 38 | KIT  | V-kit               | 6. | 7. | 6. | 7. | 7. | 7. | 2.0 | 1.0 | 2.0 | U | 0.0 | 0.6 |
| 15 |      | Hardy-Zuckerman     | 17 | 14 | 04 | 90 | 08 | 40 | 121 | 087 | 12  | p | 22  | 63  |
|    |      | 4 feline sarcoma    | 10 | 92 | 97 | 38 | 98 | 25 | 297 | 233 | 12  |   | 70  | 32  |
|    |      | viral oncogene      | 9  | 1  | 9  | 5  | 6  | 5  | 42  | 33  | 97  |   | 36  | 74  |
|    |      | homolog             |    |    |    |    |    |    |     |     | 42  |   | 06  | 04  |
| 51 | PLC  | Phospholipase C     | 2. | 3. | 3. | 4. | 4. | 3. | 1.8 | 0.8 | 1.8 | U | 0.0 | 0.6 |
| 19 | E1   | epsilon 1           | 92 | 37 | 62 | 36 | 82 | 39 | 486 | 864 | 48  | p | 46  | 63  |
| 6  |      |                     | 57 | 59 | 72 | 58 | 48 | 78 | 515 | 733 | 65  |   | 53  | 32  |
|    |      |                     | 6  | 8  | 9  | 3  |    | 2  | 69  | 33  | 15  |   | 54  | 74  |
|    |      |                     |    |    |    |    |    |    |     |     | 69  |   | 1   | 04  |
| 56 | TCE  | Transcription       | 3. | 4. | 4. | 6. | 5. | 4. | 3.1 | 1.6 | 3.1 | U | 0.0 | 0.6 |
| 84 | AL7  | elongation factor A | 05 | 71 | 22 | 08 | 93 | 97 | 774 | 678 | 77  | p | 09  | 63  |
| 9  |      | (SII)-like 7        | 87 | 51 | 25 | 36 | 99 | 65 | 806 | 833 | 48  |   | 44  | 32  |
|    |      |                     | 5  | 7  | 2  | 8  |    | 1  | 36  | 33  | 06  |   | 65  | 74  |
|    |      |                     |    |    |    |    |    |    |     |     | 36  |   | 17  | 04  |
| 92 | TIFA | TRAF-interacting    | 5. | 5. | 5. | 6. | 5. | 5. | 1.5 | 0.6 | 1.5 | U | 0.0 | 0.6 |
| 61 |      | protein with        | 28 | 07 | 37 | 36 | 59 | 68 | 528 | 348 | 52  | p | 31  | 63  |
| 0  |      | forkhead-associate  | 46 | 24 | 74 | 07 | 03 | 82 | 193 | 9   | 81  |   | 77  | 32  |
|    |      | d domain            | 9  | 8  | 6  |    | 1  | 9  | 49  |     | 93  |   | 00  | 74  |
|    |      |                     |    |    |    |    |    |    |     |     | 49  |   | 58  | 04  |
| 15 | SCF  | Sec1 family         | 5. | 5. | 5. | 5. | 6. | 5. | 1.5 | 0.6 | 1.5 | U | 0.0 | 0.6 |
| 25 | D2   | domain containing   | 34 | 05 | 29 | 88 | 17 | 57 | 723 | 529 | 72  | p | 13  | 63  |
| 79 |      | 2                   | 52 | 08 | 09 | 85 | 84 | 86 | 292 | 033 | 32  |   | 78  | 32  |

|    |      |                    |    |    |    |    |    |    |     |     |     |   |     |     |
|----|------|--------------------|----|----|----|----|----|----|-----|-----|-----|---|-----|-----|
|    |      |                    | 7  |    | 3  | 8  | 7  | 6  | 28  | 33  | 92  |   | 47  | 74  |
|    |      |                    |    |    |    |    |    |    |     |     | 28  |   | 99  | 04  |
| 83 | CRIS | Cysteine-rich      | 2. | 4. | 3. | 5. | 4. | 3. | 2.2 | 1.1 | 2.2 | U | 0.0 | 0.6 |
| 69 | PLD  | secretory protein  | 90 | 09 | 37 | 55 | 70 | 67 | 727 | 844 | 72  | p | 49  | 63  |
| 0  | 1    | LCCL domain        | 96 | 91 | 59 | 93 | 23 | 64 | 725 | 533 | 77  |   | 21  | 32  |
|    |      | containing 1       | 6  | 2  | 8  | 2  | 4  | 6  | 83  | 33  | 25  |   | 86  | 74  |
|    |      |                    |    |    |    |    |    |    |     |     | 83  |   | 63  | 04  |
| 51 | RSL2 | Ribosomal L24      | 6. | 6. | 6. | 7. | 6. | 7. | 1.6 | 0.7 | 1.6 | U | 0.0 | 0.6 |
| 18 | 4D1  | domain containing  | 25 | 00 | 42 | 22 | 56 | 11 | 699 | 398 | 69  | p | 13  | 63  |
| 7  |      | 1                  | 88 | 58 | 49 | 64 | 77 | 48 | 481 | 033 | 94  |   | 79  | 32  |
|    |      |                    | 4  |    |    |    | 2  | 3  | 78  | 33  | 81  |   | 15  | 74  |
|    |      |                    |    |    |    |    |    |    |     |     | 78  |   | 66  | 04  |
| 37 | JUN  | Jun B              | 7. | 6. | 7. | 8. | 8. | 7. | 2.4 | 1.3 | 2.4 | U | 0.0 | 0.6 |
| 26 | B    | proto-oncogene     | 19 | 79 | 17 | 18 | 95 | 95 | 778 | 090 | 77  | p | 02  | 63  |
|    |      |                    | 22 | 62 | 65 | 28 | 86 | 08 | 634 | 966 | 86  |   | 50  | 32  |
|    |      |                    | 5  | 1  | 5  | 1  | 8  | 1  | 17  | 67  | 34  |   | 89  | 74  |
|    |      |                    |    |    |    |    |    |    |     |     | 17  |   | 79  | 04  |
| 28 | IGLV | Immunoglobulin     | 3. | 4. | 3. | 3. | 5. | 4. | 1.9 | 0.9 | 1.9 | U | 0.0 | 0.6 |
| 77 | 8-61 | lambda variable    | 51 | 09 | 25 | 78 | 15 | 91 | 932 | 951 | 93  | p | 36  | 63  |
| 4  |      | 8-61               | 05 | 99 | 86 | 28 | 54 | 61 | 463 | 2   | 24  |   | 78  | 32  |
|    |      |                    | 6  |    | 7  | 8  | 3  | 8  | 12  |     | 63  |   | 28  | 74  |
|    |      |                    |    |    |    |    |    |    |     |     | 12  |   | 54  | 04  |
| 24 | LAC  | Lactation elevated | 5. | 5. | 5. | 4. | 5. | 4. | -1. | -0. | 1.5 | D | 0.0 | 0.6 |
| 62 | E1   | 1                  | 34 | 39 | 25 | 40 | 12 | 62 | 529 | 612 | 29  | o | 21  | 63  |
| 69 |      |                    | 17 | 12 | 99 | 54 | 83 | 11 | 090 | 673 | 09  | w | 71  | 32  |
|    |      |                    | 2  | 5  |    | 3  | 2  |    | 01  | 333 | 00  | n | 06  | 74  |
|    |      |                    |    |    |    |    |    |    |     |     | 1   |   | 59  | 04  |
| 10 | CDH  | Cadherin 13        | 3. | 4. | 4. | 8. | 6. | 5. | 7.7 | 2.9 | 7.7 | U | 0.0 | 0.6 |
| 12 | 13   |                    | 24 | 11 | 13 | 22 | 50 | 61 | 095 | 466 | 09  | p | 02  | 63  |

|    |      |                    |    |    |    |    |    |    |     |     |     |   |     |     |
|----|------|--------------------|----|----|----|----|----|----|-----|-----|-----|---|-----|-----|
|    |      |                    | 94 | 18 | 80 | 83 | 08 | 00 | 322 | 433 | 53  |   | 35  | 32  |
|    |      |                    | 7  | 1  | 3  | 9  | 3  | 2  | 57  | 33  | 22  |   | 58  | 74  |
|    |      |                    |    |    |    |    |    |    |     |     | 57  |   | 5   | 04  |
| 39 | MYO  | Myosin XVIII       | 8. | 9. | 8. | 7. | 8. | 8. | -1. | -0. | 1.9 | D | 0.0 | 0.6 |
| 96 | 18A  |                    | 99 | 08 | 52 | 13 | 12 | 34 | 994 | 996 | 94  | o | 21  | 63  |
| 87 |      |                    | 75 | 04 | 07 | 58 | 67 | 74 | 794 | 24  | 79  | w | 75  | 32  |
|    |      |                    | 7  | 9  | 8  | 5  | 8  | 9  | 32  |     | 43  | n | 32  | 74  |
|    |      |                    |    |    |    |    |    |    |     |     | 2   |   | 49  | 04  |
| 57 | KIA  | KIAA1161           | 6. | 5. | 6. | 4. | 5. | 5. | -1. | -0. | 1.7 | D | 0.0 | 0.6 |
| 46 | A116 |                    | 12 | 90 | 02 | 76 | 00 | 93 | 718 | 780 | 18  | o | 37  | 63  |
| 2  | 1    |                    | 31 | 37 | 22 | 62 | 95 | 04 | 234 | 926 | 23  | w | 02  | 32  |
|    |      |                    | 1  |    |    | 7  | 4  | 2  | 168 | 667 | 41  | n | 78  | 74  |
|    |      |                    |    |    |    |    |    |    |     |     | 68  |   | 94  | 04  |
| 95 | ADA  | ADAM               | 4. | 4. | 4. | 5. | 7. | 5. | 2.6 | 1.3 | 2.6 | U | 0.0 | 0.6 |
| 10 | MTS  | metallopeptidase   | 30 | 70 | 44 | 07 | 17 | 39 | 254 | 925 | 25  | p | 31  | 63  |
|    | 1    | with               | 94 | 78 | 99 | 31 | 36 | 81 | 535 | 666 | 45  |   | 01  | 32  |
|    |      | thrombospondin     | 7  | 9  | 8  | 9  | 7  | 8  | 41  | 67  | 35  |   | 73  | 74  |
|    |      | type 1 motif 1     |    |    |    |    |    |    |     |     | 41  |   | 2   | 04  |
| 10 | ADC  | Adenylate cyclase  | 6. | 7. | 7. | 7. | 8. | 7. | 1.7 | 0.7 | 1.7 | U | 0.0 | 0.6 |
| 9  | Y3   | 3                  | 46 | 18 | 21 | 81 | 22 | 22 | 388 | 981 | 38  | p | 40  | 63  |
|    |      |                    | 92 | 86 | 02 | 44 | 36 | 44 | 658 | 466 | 86  |   | 14  | 32  |
|    |      |                    | 4  |    | 2  | 1  | 4  | 5  | 87  | 67  | 58  |   | 73  | 74  |
|    |      |                    |    |    |    |    |    |    |     |     | 87  |   | 04  | 04  |
| 59 | RAP  | RAP1 gtpase        | 9. | 10 | 10 | 8. | 8. | 9. | -1. | -0. | 1.9 | D | 0.0 | 0.6 |
| 09 | 1GA  | activating protein | 44 | .0 | .0 | 16 | 85 | 72 | 915 | 937 | 15  | o | 49  | 63  |
|    | P    |                    | 94 | 66 | 43 | 97 | 01 | 60 | 596 | 793 | 59  | w | 67  | 32  |
|    |      |                    | 1  | 53 | 44 | 5  | 9  | 6  | 007 | 333 | 60  | n | 04  | 74  |
|    |      |                    |    |    |    |    |    |    |     |     | 07  |   | 83  | 04  |
| 20 | EPH  | EPH receptor A3    | 3. | 5. | 5. | 8. | 6. | 6. | 6.4 | 2.6 | 6.4 | U | 0.0 | 0.6 |

|    |      |                   |    |    |    |    |    |    |     |     |     |   |     |     |
|----|------|-------------------|----|----|----|----|----|----|-----|-----|-----|---|-----|-----|
| 42 | A3   |                   | 64 | 50 | 02 | 89 | 95 | 42 | 967 | 997 | 96  | p | 07  | 63  |
|    |      |                   | 50 | 69 | 75 | 60 | 53 | 73 | 581 | 2   | 75  |   | 14  | 32  |
|    |      |                   | 1  | 9  | 3  | 3  | 2  | 4  | 5   |     | 81  |   | 12  | 74  |
|    |      |                   |    |    |    |    |    |    |     |     | 5   |   | 04  | 04  |
| 91 | SLC2 | Solute carrier    | 9. | 9. | 9. | 6. | 6. | 8. | -3. | -1. | 3.5 | D | 0.0 | 0.6 |
| 53 | 8A2  | family 28         | 48 | 07 | 17 | 87 | 98 | 36 | 576 | 838 | 76  | o | 02  | 63  |
|    |      | (concentrative    | 84 | 47 | 63 | 29 | 41 | 70 | 355 | 49  | 35  | w | 44  | 32  |
|    |      | nucleoside        | 3  | 8  | 2  | 1  | 4  | 1  | 124 |     | 51  | n | 58  | 74  |
|    |      | transporter),     |    |    |    |    |    |    |     |     | 24  |   | 73  | 04  |
|    |      | member 2          |    |    |    |    |    |    |     |     |     |   |     |     |
| 10 | CYS  | Cysteinyln        | 3. | 3. | 3. | 4. | 4. | 3. | 1.5 | 0.6 | 1.5 | U | 0.0 | 0.6 |
| 80 | LTR1 | leukotriene       | 57 | 47 | 75 | 15 | 86 | 78 | 879 | 671 | 87  | p | 41  | 63  |
| 0  |      | receptor 1        | 84 | 71 | 20 | 31 | 63 | 95 | 659 | 8   | 96  |   | 44  | 32  |
|    |      |                   | 2  | 2  | 4  | 8  | 8  | 6  | 74  |     | 59  |   | 50  | 74  |
|    |      |                   |    |    |    |    |    |    |     |     | 74  |   | 61  | 04  |
| 25 | SUN  | Sad1 and UNC84    | 4. | 3. | 4. | 5. | 4. | 4. | 1.6 | 0.7 | 1.6 | U | 0.0 | 0.6 |
| 77 | 2    | domain containing | 43 | 80 | 21 | 43 | 47 | 72 | 543 | 262 | 54  | p | 37  | 63  |
| 7  |      | 2                 | 58 | 55 | 82 | 64 | 34 | 85 | 486 | 633 | 34  |   | 75  | 32  |
|    |      |                   | 2  | 8  | 7  | 7  | 7  | 2  | 76  | 33  | 86  |   | 43  | 74  |
|    |      |                   |    |    |    |    |    |    |     |     | 76  |   | 92  | 04  |
| 11 | GBP  | Guanylate binding | 4. | 4. | 5. | 6. | 5. | 5. | 1.8 | 0.8 | 1.8 | U | 0.0 | 0.6 |
| 53 | 4    | protein 4         | 55 | 58 | 06 | 17 | 56 | 00 | 012 | 490 | 01  | p | 29  | 63  |
| 61 |      |                   | 16 | 13 | 71 | 26 | 67 | 76 | 727 | 166 | 27  |   | 74  | 32  |
|    |      |                   | 3  |    |    | 9  | 6  | 3  | 69  | 67  | 27  |   | 34  | 74  |
|    |      |                   |    |    |    |    |    |    |     |     | 69  |   | 03  | 04  |
| 10 | ADI  | Adipogenesis      | 7. | 8. | 8. | 9. | 10 | 8. | 2.4 | 1.2 | 2.4 | U | 0.0 | 0.6 |
| 97 | RF   | regulatory factor | 70 | 02 | 63 | 66 | .3 | 22 | 540 | 951 | 54  | p | 45  | 63  |
| 4  |      |                   | 23 | 23 | 39 | 69 | 52 | 41 | 080 | 4   | 00  |   | 72  | 32  |
|    |      |                   | 3  | 3  | 6  | 7  | 93 | 4  | 81  |     | 80  |   | 09  | 74  |

|    |      |                    |    |    |    |    |    |    |     |     |     |    |     |     |    |
|----|------|--------------------|----|----|----|----|----|----|-----|-----|-----|----|-----|-----|----|
|    |      |                    |    |    |    |    |    |    |     |     |     | 81 |     | 61  | 04 |
| 32 | HOX  | Homeobox B5        | 3. | 3. | 3. | 6. | 5. | 3. | 2.3 | 1.2 | 2.3 | U  | 0.0 | 0.6 |    |
| 15 | B5   |                    | 78 | 74 | 83 | 04 | 22 | 83 | 721 | 461 | 72  | p  | 42  | 63  |    |
|    |      |                    | 96 | 43 | 09 | 47 | 78 | 09 | 523 | 966 | 15  |    | 01  | 32  |    |
|    |      |                    | 2  | 4  | 1  | 2  | 3  | 1  | 46  | 67  | 23  |    | 80  | 74  |    |
|    |      |                    |    |    |    |    |    |    |     |     | 46  |    | 99  | 04  |    |
| 51 | MLX  | MLX interacting    | 10 | 9. | 9. | 7. | 8. | 9. | -2. | -1. | 2.1 | D  | 0.0 | 0.6 |    |
| 08 | IPL  | protein-like       | .0 | 43 | 15 | 84 | 08 | 30 | 177 | 122 | 77  | o  | 30  | 63  |    |
| 5  |      |                    | 18 | 18 | 64 | 19 | 85 | 91 | 053 | 376 | 05  | w  | 41  | 32  |    |
|    |      |                    | 43 | 3  | 7  | 1  | 7  | 2  | 206 | 667 | 32  | n  | 47  | 74  |    |
|    |      |                    |    |    |    |    |    |    |     |     | 06  |    | 04  | 04  |    |
| 46 | NAP  | Nucleosome         | 8. | 7. | 8. | 9. | 8. | 8. | 1.5 | 0.6 | 1.5 | U  | 0.0 | 0.6 |    |
| 73 | IL1  | assembly protein   | 04 | 72 | 17 | 19 | 42 | 29 | 847 | 642 | 84  | p  | 44  | 63  |    |
|    |      | 1-like 1           | 13 | 29 | 01 | 95 | 83 | 93 | 954 | 966 | 79  |    | 21  | 32  |    |
|    |      |                    | 3  | 3  | 3  | 8  | 8  | 2  | 76  | 67  | 54  |    | 67  | 74  |    |
|    |      |                    |    |    |    |    |    |    |     |     | 76  |    | 27  | 04  |    |
| 27 | GJA5 | Gap junction       | 3. | 3. | 3. | 4. | 4. | 3. | 1.6 | 0.7 | 1.6 | U  | 0.0 | 0.6 |    |
| 02 |      | protein $\alpha$ 5 | 45 | 61 | 37 | 61 | 29 | 68 | 459 | 189 | 45  | p  | 18  | 63  |    |
|    |      |                    | 53 | 41 | 83 | 86 | 89 | 7  | 456 | 166 | 94  |    | 77  | 32  |    |
|    |      |                    | 5  | 9  | 1  | 6  | 4  |    | 14  | 67  | 56  |    | 30  | 74  |    |
|    |      |                    |    |    |    |    |    |    |     |     | 14  |    | 4   | 04  |    |
| 27 | PGA  | Post-GPI           | 5. | 4. | 5. | 6. | 5. | 5. | 1.6 | 0.7 | 1.6 | U  | 0.0 | 0.6 |    |
| 31 | P2   | attachment to      | 28 | 59 | 44 | 09 | 56 | 87 | 669 | 372 | 66  | p  | 27  | 63  |    |
| 5  |      | proteins 2         | 57 | 79 | 40 | 86 | 51 | 54 | 567 | 166 | 95  |    | 14  | 32  |    |
|    |      |                    |    | 4  | 1  | 6  | 5  | 9  | 42  | 67  | 67  |    | 44  | 74  |    |
|    |      |                    |    |    |    |    |    |    |     |     | 42  |    | 42  | 04  |    |
| 84 | CILP | Cartilage          | 6. | 6. | 9. | 5. | 4. | 5. | -5. | -2. | 5.9 | D  | 0.0 | 0.6 |    |
| 83 |      | intermediate layer | 77 | 99 | 14 | 09 | 46 | 61 | 982 | 580 | 82  | o  | 05  | 63  |    |
|    |      | protein            | 24 | 08 | 82 | 13 | 02 | 74 | 934 | 853 | 93  | w  | 00  | 32  |    |

|    |     |                     |    |    |    |    |    |    |     |     |     |   |     |     |
|----|-----|---------------------|----|----|----|----|----|----|-----|-----|-----|---|-----|-----|
|    |     |                     | 7  | 8  | 9  | 1  | 9  | 8  | 768 | 333 | 47  | n | 50  | 74  |
|    |     |                     |    |    |    |    |    |    |     |     | 68  |   | 53  | 04  |
| 53 | PKH | Polycystic kidney   | 6. | 5. | 5. | 4. | 5. | 5. | -1. | -0. | 1.8 | D | 0.0 | 0.6 |
| 14 | D1  | and hepatic disease | 51 | 69 | 42 | 64 | 21 | 11 | 847 | 885 | 47  | o | 25  | 63  |
|    |     | 1 (autosomal        | 94 | 62 | 45 | 85 | 61 | 83 | 652 | 693 | 65  | w | 00  | 32  |
|    |     | recessive)          | 3  | 5  | 1  | 7  | 7  | 7  | 357 | 333 | 23  | n | 05  | 74  |
|    |     |                     |    |    |    |    |    |    |     |     | 57  |   | 69  | 04  |
| 51 | WBP | WW domain           | 7. | 7. | 7. | 8. | 7. | 7. | 1.7 | 0.8 | 1.7 | U | 0.0 | 0.6 |
| 18 | 5   | binding protein 5   | 01 | 26 | 00 | 42 | 81 | 58 | 966 | 452 | 96  | p | 10  | 63  |
| 6  |     |                     | 47 | 99 | 34 | 13 | 36 | 90 | 300 | 933 | 63  |   | 06  | 32  |
|    |     |                     | 2  | 4  | 9  | 9  | 1  | 3  | 05  | 33  | 00  |   | 01  | 74  |
|    |     |                     |    |    |    |    |    |    |     |     | 05  |   | 29  | 04  |
| 11 | XKR | X-linked Kx blood   | 3. | 3. | 3. | 4. | 5. | 3. | 2.0 | 1.0 | 2.0 | U | 0.0 | 0.6 |
| 47 | 4   | group related 4     | 31 | 13 | 02 | 03 | 04 | 53 | 666 | 473 | 66  | p | 21  | 63  |
| 86 |     |                     | 83 | 10 | 10 | 31 | 56 | 36 | 775 | 133 | 67  |   | 66  | 32  |
|    |     |                     | 5  | 4  | 9  | 8  | 1  | 3  | 8   | 33  | 75  |   | 41  | 74  |
|    |     |                     |    |    |    |    |    |    |     |     | 8   |   | 89  | 04  |
| 28 | LUR | Leucine rich        | 6. | 7. | 7. | 7. | 8. | 7. | 1.5 | 0.6 | 1.5 | U | 0.0 | 0.6 |
| 63 | AP1 | adaptor protein     | 96 | 04 | 04 | 85 | 10 | 07 | 798 | 597 | 79  | p | 45  | 63  |
| 43 | L   | 1-like              | 39 | 28 | 92 | 75 | 05 | 74 | 599 | 966 | 85  |   | 47  | 32  |
|    |     |                     | 6  | 4  | 8  | 5  | 1  | 1  | 43  | 67  | 99  |   | 32  | 74  |
|    |     |                     |    |    |    |    |    |    |     |     | 43  |   | 32  | 04  |
| 64 | MRO | Maestro heat-like   | 7. | 6. | 6. | 5. | 6. | 6. | -2. | -1. | 2.0 | D | 0.0 | 0.6 |
| 24 | H6  | repeat family       | 22 | 83 | 94 | 45 | 05 | 36 | 063 | 045 | 63  | o | 05  | 63  |
| 75 |     | member 6            | 73 | 42 | 17 | 52 | 16 | 06 | 752 | 27  | 75  | w | 01  | 32  |
|    |     |                     | 4  | 3  | 6  | 3  | 7  | 2  | 553 |     | 25  | n | 30  | 74  |
|    |     |                     |    |    |    |    |    |    |     |     | 53  |   | 57  | 04  |
| 96 | ABC | ATP binding         | 8. | 7. | 8. | 7. | 6. | 7. | -2. | -1. | 2.0 | D | 0.0 | 0.6 |
| 19 | G1  | cassette subfamily  | 25 | 55 | 19 | 33 | 01 | 58 | 034 | 024 | 34  | o | 48  | 63  |

|               |                  |                                                                                 |                      |                     |                     |                     |                      |                     |                          |                             |                             |                  |                             |                             |
|---------------|------------------|---------------------------------------------------------------------------------|----------------------|---------------------|---------------------|---------------------|----------------------|---------------------|--------------------------|-----------------------------|-----------------------------|------------------|-----------------------------|-----------------------------|
|               |                  | G member 1                                                                      | 97<br>4              | 94<br>6             | 02<br>3             | 89<br>6             | 03<br>3              | 53<br>2             | 874<br>754               | 94                          | 87<br>47<br>54              | w<br>n           | 04<br>51<br>91              | 32<br>74<br>04              |
| 28<br>39<br>6 | IGH<br>V4-3<br>1 | Immunoglobulin<br>heavy variable<br>4-31                                        | 6.<br>96<br>97<br>1  | 7.<br>48<br>78<br>7 | 6.<br>70<br>47<br>9 | 7.<br>76<br>40<br>2 | 10<br>.3<br>05<br>54 | 8.<br>63<br>67<br>9 | 3.5<br>999<br>910<br>84  | 1.8<br>479<br>933<br>33     | 3.5<br>99<br>99<br>10<br>84 | U<br>p           | 0.0<br>18<br>41<br>96<br>03 | 0.6<br>63<br>32<br>74<br>04 |
| 18<br>27      | RCA<br>N1        | Regulator of<br>calcineurin 1                                                   | 6.<br>26<br>62<br>6  | 5.<br>48<br>03<br>1 | 6.<br>36<br>15<br>3 | 6.<br>95<br>12<br>6 | 7.<br>72<br>43<br>8  | 7.<br>04<br>06<br>9 | 2.3<br>017<br>694<br>44  | 1.2<br>027<br>433<br>33     | 2.3<br>01<br>76<br>94<br>44 | U<br>p           | 0.0<br>06<br>30<br>57<br>97 | 0.6<br>63<br>32<br>74<br>04 |
| 65<br>13      | SLC2<br>A1       | Solute carrier<br>family 2<br>(facilitated glucose<br>transporter),<br>member 1 | 10<br>.0<br>12<br>51 | 9.<br>29<br>38<br>5 | 8.<br>94<br>11<br>8 | 7.<br>41<br>47<br>8 | 8.<br>50<br>69<br>7  | 8.<br>89<br>98<br>4 | -2.<br>206<br>841<br>985 | -1.<br>141<br>983<br>333    | 2.2<br>06<br>84<br>19<br>85 | D<br>o<br>w<br>n | 0.0<br>33<br>48<br>31<br>76 | 0.6<br>63<br>32<br>74<br>04 |
| 34<br>91      | CYR<br>61        | Cysteine-rich,<br>angiogenic inducer,<br>61                                     | 5.<br>77<br>17<br>7  | 6.<br>55<br>45<br>2 | 5.<br>52<br>71<br>5 | 9.<br>76<br>61<br>5 | 9.<br>54<br>01<br>5  | 8.<br>81<br>19<br>4 | 10.<br>715<br>297<br>5   | 3.4<br>216<br>52<br>97<br>5 | 10.<br>71<br>52<br>97<br>5  | U<br>p           | 2.3<br>53<br>74<br>E-0<br>5 | 0.1<br>31<br>38<br>59<br>88 |
| 52<br>74      | SER<br>PINI<br>1 | Serpin peptidase<br>inhibitor, clade I<br>(neuroserpin),<br>member 1            | 3.<br>86<br>53<br>5  | 3.<br>85<br>78<br>3 | 3.<br>76<br>04<br>8 | 4.<br>71<br>46<br>1 | 5.<br>33<br>29<br>5  | 4.<br>18<br>06<br>1 | 1.8<br>853<br>556<br>11  | 0.9<br>148<br>366<br>67     | 1.8<br>85<br>35<br>56<br>11 | U<br>p           | 0.0<br>13<br>00<br>59<br>69 | 0.6<br>63<br>32<br>74<br>04 |
| 14            | CTG              | Connective tissue                                                               | 3.                   | 6.                  | 5.                  | 10                  | 9.                   | 7.                  | 12.                      | 3.6                         | 12.                         | U                | 0.0                         | 0.6                         |



|    |      |                        |    |    |    |    |    |    |     |     |     |   |     |     |
|----|------|------------------------|----|----|----|----|----|----|-----|-----|-----|---|-----|-----|
| 90 | F    | growth factor          | 87 | 77 | 30 | .2 | 30 | 40 | 721 | 691 | 72  | p | 04  | 63  |
|    |      |                        | 47 | 84 | 39 | 57 | 43 | 28 | 115 | 533 | 111 |   | 86  | 32  |
|    |      |                        | 5  | 1  | 6  | 35 | 8  | 5  | 98  | 33  | 59  |   | 41  | 74  |
|    |      |                        |    |    |    |    |    |    |     |     | 8   |   | 22  | 04  |
| 46 | CEA  | Carcinoembryonic       | 7. | 6. | 7. | 8. | 9. | 7. | 2.1 | 1.1 | 2.1 | U | 0.0 | 0.6 |
| 80 | CAM  | antigen-related cell   | 20 | 99 | 51 | 36 | 31 | 44 | 956 | 346 | 95  | p | 38  | 63  |
|    | 6    | adhesion molecule      | 65 | 63 | 35 | 54 | 23 | 26 | 731 | 633 | 67  |   | 00  | 32  |
|    |      | 6 (non-specific        | 1  | 4  | 6  |    | 5  | 5  | 86  | 33  | 31  |   | 53  | 74  |
|    |      | cross reacting         |    |    |    |    |    |    |     |     | 86  |   | 53  | 04  |
|    |      | antigen)               |    |    |    |    |    |    |     |     |     |   |     |     |
| 25 | ANK  | Ankyrin repeat and     | 7. | 7. | 7. | 6. | 6. | 7. | -1. | -0. | 1.6 | D | 0.0 | 0.6 |
| 76 | S4B  | sterile $\alpha$ motif | 61 | 04 | 25 | 51 | 13 | 12 | 635 | 709 | 35  | o | 42  | 63  |
| 29 |      | domain containing      | 11 | 16 | 13 | 81 | 33 | 43 | 142 | 416 | 14  | w | 76  | 32  |
|    |      | 4B                     | 4  |    | 7  |    | 9  | 7  | 837 | 667 | 28  | n | 04  | 74  |
|    |      |                        |    |    |    |    |    |    |     |     | 37  |   | 3   | 04  |
| 11 | ELF  | Extracellular          | 7. | 7. | 8. | 6. | 6. | 7. | -1. | -0. | 1.9 | D | 0.0 | 0.6 |
| 47 | N2   | leucine-rich repeat    | 44 | 62 | 51 | 55 | 48 | 56 | 989 | 992 | 89  | o | 38  | 63  |
| 94 |      | and fibronectin        | 20 | 60 | 83 | 58 | 75 | 60 | 404 | 336 | 40  | w | 04  | 32  |
|    |      | type III domain        | 2  | 8  | 9  | 8  | 3  | 7  | 53  | 667 | 45  | n | 27  | 74  |
|    |      | containing 2           |    |    |    |    |    |    |     |     | 3   |   | 78  | 04  |
| 55 | BRI  | BRX1, biogenesis       | 4. | 3. | 3. | 4. | 4. | 4. | 1.6 | 0.6 | 1.6 | U | 0.0 | 0.6 |
| 29 | X1   | of ribosomes           | 02 | 22 | 92 | 55 | 47 | 22 | 146 | 911 | 14  | p | 20  | 63  |
| 9  |      |                        | 94 | 38 | 40 | 35 | 47 | 26 | 147 | 9   | 61  |   | 47  | 32  |
|    |      |                        | 6  |    | 4  | 4  | 2  | 1  | 76  |     | 47  |   | 14  | 74  |
|    |      |                        |    |    |    |    |    |    |     |     | 76  |   | 21  | 04  |
| 26 | CYFI | Cytoplasmic            | 7. | 7. | 7. | 6. | 6. | 7. | -1. | -0. | 1.6 | D | 0.0 | 0.6 |
| 99 | P2   | FMR1 interacting       | 92 | 09 | 14 | 30 | 70 | 02 | 641 | 714 | 41  | o | 44  | 63  |
| 9  |      | protein 2              | 96 | 88 | 29 | 05 | 12 | 46 | 430 | 953 | 43  | w | 61  | 32  |
|    |      |                        |    | 2  | 2  | 7  | 9  | 2  | 122 | 333 | 01  | n | 62  | 74  |

|    |      |                     |    |    |    |    |    |    |     |     |     |   |     |     |
|----|------|---------------------|----|----|----|----|----|----|-----|-----|-----|---|-----|-----|
|    |      |                     |    |    |    |    |    |    |     |     | 22  |   | 36  | 04  |
| 98 | EPM  | EPM2A (laforin)     | 6. | 7. | 6. | 6. | 6. | 6. | -1. | -0. | 1.5 | D | 0.0 | 0.6 |
| 52 | 2AIP | interacting protein | 98 | 03 | 86 | 32 | 25 | 51 | 515 | 599 | 15  | o | 06  | 63  |
|    | 1    | 1                   | 21 | 69 | 84 | 28 | 17 | 29 | 702 | 986 | 70  | w | 21  | 32  |
|    |      |                     | 3  | 5  | 6  | 2  | 9  | 7  | 558 | 667 | 25  | n | 60  | 74  |
|    |      |                     |    |    |    |    |    |    |     |     | 58  |   | 84  | 04  |
| 70 | TFD  | Transcription       | 5. | 5. | 6. | 6. | 6. | 6. | 1.5 | 0.6 | 1.5 | U | 0.0 | 0.6 |
| 27 | P1   | factor Dp-1         | 65 | 23 | 07 | 47 | 17 | 19 | 460 | 285 | 46  | p | 34  | 63  |
|    |      |                     | 05 | 21 | 37 | 06 | 30 | 84 | 568 | 933 | 05  |   | 71  | 32  |
|    |      |                     | 7  |    | 2  | 2  | 9  | 6  | 11  | 33  | 68  |   | 49  | 74  |
|    |      |                     |    |    |    |    |    |    |     |     | 11  |   | 97  | 04  |
| 14 | CRY  | Crystallin mu       | 8. | 8. | 8. | 7. | 7. | 8. | -1. | -0. | 1.9 | D | 0.0 | 0.6 |
| 28 | M    |                     | 67 | 87 | 57 | 14 | 70 | 42 | 933 | 951 | 33  | o | 20  | 63  |
|    |      |                     | 16 | 97 | 52 | 52 | 81 | 02 | 243 | 023 | 24  | w | 03  | 32  |
|    |      |                     |    | 8  | 2  |    | 2  | 1  | 461 | 333 | 34  | n | 81  | 74  |
|    |      |                     |    |    |    |    |    |    |     |     | 61  |   | 18  | 04  |
| 37 | WAS  | WAS protein         | 8. | 8. | 7. | 7. | 7. | 7. | -1. | -0. | 1.5 | D | 0.0 | 0.6 |
| 46 | H3P  | family homolog 3    | 71 | 39 | 93 | 33 | 98 | 74 | 583 | 662 | 83  | o | 38  | 63  |
| 66 |      | pseudogene          | 93 | 44 | 59 | 68 | 36 | 07 | 159 | 806 | 15  | w | 99  | 32  |
|    |      |                     | 2  | 1  | 2  | 8  | 5  |    | 561 | 667 | 95  | n | 95  | 74  |
|    |      |                     |    |    |    |    |    |    |     |     | 61  |   | 13  | 04  |
| 44 | MT1  | Metallothionein 1E  | 8. | 7. | 8. | 7. | 7. | 7. | -1. | -0. | 1.6 | D | 0.0 | 0.6 |
| 93 | E    |                     | 32 | 80 | 30 | 45 | 86 | 06 | 605 | 682 | 05  | o | 32  | 63  |
|    |      |                     | 28 | 21 | 66 | 24 | 74 | 33 | 259 | 806 | 25  | w | 75  | 32  |
|    |      |                     | 1  | 7  | 9  | 4  | 4  | 7  | 645 | 667 | 96  | n | 10  | 74  |
|    |      |                     |    |    |    |    |    |    |     |     | 45  |   | 15  | 04  |
| 80 | RAS  | Ras association     | 10 | 9. | 9. | 8. | 9. | 9. | -1. | -0. | 1.8 | D | 0.0 | 0.6 |
| 45 | SF7  | (ralgds/AF-6)       | .3 | 53 | 46 | 46 | 01 | 18 | 847 | 885 | 47  | o | 19  | 63  |
|    |      | domain family       | 13 | 83 | 60 | 38 | 65 | 15 | 165 | 313 | 16  | w | 69  | 32  |

|    |       |                                           |    |    |    |    |    |    |     |     |     |   |     |     |
|----|-------|-------------------------------------------|----|----|----|----|----|----|-----|-----|-----|---|-----|-----|
|    |       | (N-terminal)<br>member 7                  | 45 | 1  | 6  | 3  |    | 5  | 757 | 333 | 57  | n | 64  | 74  |
|    |       |                                           |    |    |    |    |    |    |     |     | 57  |   | 9   | 04  |
| 77 | SLC3  | Solute carrier                            | 10 | 10 | 10 | 7. | 7. | 9. | -4. | -2. | 4.5 | D | 0.0 | 0.6 |
| 80 | 0A2   | family 30 (zinc transporter),<br>member 2 | .3 | .2 | .4 | 13 | 78 | 63 | 503 | 170 | 03  | o | 07  | 63  |
|    |       |                                           | 84 | 22 | 53 | 59 | 18 | 00 | 167 | 94  | 16  | w | 35  | 32  |
|    |       |                                           | 38 | 99 | 28 | 3  | 8  | 2  | 059 |     | 70  | n | 49  | 74  |
|    |       |                                           |    |    |    |    |    |    |     |     | 59  |   | 35  | 04  |
| 28 | IGLV  | Immunoglobulin                            | 5. | 4. | 5. | 5. | 6. | 7. | 2.5 | 1.3 | 2.5 | U | 0.0 | 0.6 |
| 82 | 1-51  | lambda variable                           | 07 | 98 | 12 | 37 | 83 | 06 | 777 | 661 | 77  | p | 14  | 63  |
| 0  |       | 1-51                                      | 23 | 42 | 46 | 98 | 04 | 93 | 934 | 366 | 79  |   | 36  | 32  |
|    |       |                                           | 8  | 5  | 1  | 6  | 2  | 7  | 44  | 67  | 34  |   | 23  | 74  |
|    |       |                                           |    |    |    |    |    |    |     |     | 44  |   | 89  | 04  |
| 18 | DUS   | Dual specificity                          | 4. | 4. | 4. | 4. | 5. | 5. | 1.5 | 0.6 | 1.5 | U | 0.0 | 0.6 |
| 44 | P2    | phosphatase 2                             | 51 | 41 | 77 | 93 | 61 | 19 | 983 | 766 | 98  | p | 15  | 63  |
|    |       |                                           | 96 | 36 | 91 | 29 | 38 | 53 | 942 | 233 | 39  |   | 30  | 32  |
|    |       |                                           | 2  | 1  | 3  | 6  | 8  | 9  | 89  | 33  | 42  |   | 19  | 74  |
|    |       |                                           |    |    |    |    |    |    |     |     | 89  |   | 55  | 04  |
| 55 | RFK   | Riboflavin kinase                         | 9. | 9. | 9. | 8. | 8. | 9. | -1. | -0. | 1.5 | D | 0.0 | 0.6 |
| 31 |       |                                           | 39 | 12 | 29 | 14 | 69 | 11 | 537 | 621 | 37  | o | 47  | 63  |
| 2  |       |                                           | 96 | 82 | 75 | 90 | 33 | 99 | 958 | 016 | 95  | w | 08  | 32  |
|    |       |                                           | 2  | 1  | 2  | 8  | 1  | 1  | 598 | 667 | 85  | n | 36  | 74  |
|    |       |                                           |    |    |    |    |    |    |     |     | 98  |   | 93  | 04  |
| 22 | LRR   | Leucine rich repeat                       | 4. | 4. | 4. | 3. | 3. | 4. | -1. | -0. | 1.6 | D | 0.0 | 0.6 |
| 14 | C73   | containing 73                             | 64 | 26 | 83 | 70 | 73 | 24 | 610 | 687 | 10  | o | 15  | 63  |
| 24 |       |                                           | 72 | 10 | 32 | 01 | 38 | 49 | 601 | 6   | 60  | w | 21  | 32  |
|    |       |                                           | 9  | 8  | 5  |    |    | 2  | 967 |     | 19  | n | 35  | 74  |
|    |       |                                           |    |    |    |    |    |    |     |     | 67  |   | 39  | 04  |
| 22 | C6orf | Chromosome 6                              | 6. | 6. | 6. | 4. | 4. | 6. | -2. | -1. | 2.1 | D | 0.0 | 0.6 |
| 14 | 223   | open reading frame                        | 65 | 73 | 03 | 85 | 88 | 31 | 180 | 124 | 80  | o | 32  | 63  |

|               |            |                                                              |                     |                     |                     |                     |                     |                     |                          |                          |                             |                  |                             |                             |
|---------------|------------|--------------------------------------------------------------|---------------------|---------------------|---------------------|---------------------|---------------------|---------------------|--------------------------|--------------------------|-----------------------------|------------------|-----------------------------|-----------------------------|
| 16            |            | 223                                                          | 54<br>2             | 94<br>9             | 12<br>8             | 36<br>3             | 76                  | 09<br>9             | 496<br>488               | 656<br>667               | 49<br>64<br>88              | w<br>n           | 48<br>80<br>58              | 32<br>74<br>04              |
| 55<br>04<br>0 | EPN<br>3   | Epsin 3                                                      | 9.<br>00<br>53<br>3 | 8.<br>25<br>08<br>1 | 7.<br>99<br>30<br>7 | 7.<br>06<br>60<br>9 | 7.<br>43<br>63      | 8.<br>00<br>76<br>1 | -1.<br>883<br>048<br>293 | -0.<br>913<br>07         | 1.8<br>83<br>04<br>82<br>93 | D<br>o<br>w<br>n | 0.0<br>30<br>47<br>42<br>16 | 0.6<br>63<br>32<br>74<br>04 |
| 56<br>14<br>3 | PCD<br>HA5 | Protocadherin $\alpha$ 5                                     | 7.<br>44<br>20<br>9 | 7.<br>73<br>45<br>2 | 6.<br>91<br>29<br>9 | 6.<br>53<br>69<br>2 | 6.<br>83<br>18<br>2 | 6.<br>80<br>31<br>1 | -1.<br>557<br>526<br>454 | -0.<br>639<br>256<br>667 | 1.5<br>57<br>52<br>64<br>54 | D<br>o<br>w<br>n | 0.0<br>31<br>81<br>64<br>86 | 0.6<br>63<br>32<br>74<br>04 |
| 83<br>85<br>6 | FSD1<br>L  | Fibronectin type III<br>and SPRY domain<br>containing 1-like | 5.<br>91<br>03<br>8 | 4.<br>49<br>14<br>2 | 5.<br>11<br>87<br>4 | 3.<br>76<br>98<br>9 | 2.<br>99<br>11<br>4 | 4.<br>85<br>51<br>1 | -2.<br>464<br>793<br>301 | -1.<br>301<br>466<br>667 | 2.4<br>64<br>79<br>33<br>01 | D<br>o<br>w<br>n | 0.0<br>42<br>53<br>34<br>33 | 0.6<br>63<br>32<br>74<br>04 |
| 83<br>45<br>0 | DRC<br>3   | Dynein regulatory<br>complex subunit 3                       | 6.<br>25<br>63<br>8 | 6.<br>53<br>04<br>3 | 5.<br>62<br>52<br>3 | 5.<br>21<br>92<br>3 | 5.<br>03<br>25<br>7 | 5.<br>26<br>46<br>5 | -1.<br>952<br>316<br>11  | -0.<br>965<br>186<br>667 | 1.9<br>52<br>31<br>61<br>1  | D<br>o<br>w<br>n | 0.0<br>06<br>14<br>91<br>58 | 0.6<br>63<br>32<br>74<br>04 |
| 10<br>29<br>9 | MAR<br>CH6 | Membrane<br>associated<br>ring-CH-type<br>finger 6           | 9.<br>75<br>32      | 9.<br>74<br>45<br>1 | 9.<br>49<br>85<br>9 | 8.<br>86<br>82<br>2 | 9.<br>28<br>69<br>4 | 8.<br>87<br>19<br>2 | -1.<br>576<br>151<br>995 | -0.<br>656<br>406<br>667 | 1.5<br>76<br>15<br>19<br>95 | D<br>o<br>w<br>n | 0.0<br>08<br>44<br>82<br>27 | 0.6<br>63<br>32<br>74<br>04 |
| 55            | PNM        | Paraneoplastic Ma                                            | 3.                  | 5.                  | 3.                  | 6.                  | 6.                  | 5.                  | 3.8                      | 1.9                      | 3.8                         | U                | 0.0                         | 0.6                         |

|    |     |                     |    |    |    |    |    |    |     |     |     |   |     |     |
|----|-----|---------------------|----|----|----|----|----|----|-----|-----|-----|---|-----|-----|
| 22 | AL1 | antigen family-like | 13 | 28 | 56 | 57 | 15 | 08 | 560 | 471 | 56  | p | 15  | 63  |
| 8  |     | 1                   | 61 | 38 | 17 | 97 | 93 | 40 | 666 | 3   | 06  |   | 47  | 32  |
|    |     |                     | 1  |    | 3  |    |    | 3  | 82  |     | 66  |   | 99  | 74  |
|    |     |                     |    |    |    |    |    |    |     |     | 82  |   | 83  | 04  |
| 57 | PTG | Prostaglandin D2    | 9. | 10 | 9. | 11 | 10 | 11 | 2.1 | 1.0 | 2.1 | U | 0.0 | 0.6 |
| 30 | DS  | synthase            | 42 | .4 | 48 | .1 | .1 | .2 | 272 | 890 | 27  | p | 24  | 63  |
|    |     |                     | 99 | 28 | 78 | 94 | 74 | 44 | 751 | 066 | 27  |   | 68  | 32  |
|    |     |                     | 4  | 84 | 7  | 3  | 78 | 59 | 76  | 67  | 51  |   | 30  | 74  |
|    |     |                     |    |    |    |    |    |    |     |     | 76  |   | 72  | 04  |
| 11 | BOR | BLOC-1 related      | 7. | 7. | 7. | 6. | 6. | 7. | -1. | -0. | 1.6 | D | 0.0 | 0.6 |
| 90 | CS7 | complex subunit 7   | 55 | 12 | 77 | 33 | 94 | 09 | 609 | 687 | 09  | o | 36  | 63  |
| 32 |     |                     | 00 | 15 | 02 | 76 | 43 | 87 | 947 | 013 | 94  | w | 15  | 32  |
|    |     |                     | 9  |    | 3  | 8  | 3  | 7  | 154 | 333 | 71  | n | 20  | 74  |
|    |     |                     |    |    |    |    |    |    |     |     | 54  |   | 5   | 04  |
| 23 | CBL | Cbl                 | 7. | 7. | 7. | 6. | 6. | 6. | -1. | -0. | 1.9 | D | 0.0 | 0.6 |
| 62 | C   | proto-oncogene C,   | 88 | 25 | 08 | 25 | 31 | 79 | 935 | 952 | 35  | o | 08  | 63  |
| 4  |     | E3 ubiquitin        | 65 | 65 | 51 | 63 | 72 | 6  | 715 | 866 | 71  | w | 61  | 32  |
|    |     | protein ligase      | 4  | 1  | 7  | 4  | 8  |    | 147 | 667 | 51  | n | 20  | 74  |
|    |     |                     |    |    |    |    |    |    |     |     | 47  |   | 28  | 04  |
| 80 | BAI | BAI1-associated     | 9. | 9. | 9. | 7. | 8. | 9. | -2. | -1. | 2.0 | D | 0.0 | 0.6 |
| 11 | AP2 | protein 2-like 2    | 74 | 58 | 34 | 64 | 58 | 24 | 097 | 068 | 97  | o | 27  | 63  |
| 5  | L2  |                     | 21 | 79 | 77 | 81 | 04 | 23 | 930 | 966 | 93  | w | 12  | 32  |
|    |     |                     | 6  | 5  | 2  | 9  | 3  | 1  | 182 | 667 | 01  | n | 77  | 74  |
|    |     |                     |    |    |    |    |    |    |     |     | 82  |   | 13  | 04  |
| 55 | AP5 | Adaptor-related     | 4. | 4. | 3. | 3. | 3. | 3. | -1. | -0. | 1.5 | D | 0.0 | 0.6 |
| 74 | M1  | protein complex 5,  | 33 | 07 | 53 | 27 | 12 | 52 | 595 | 674 | 95  | o | 18  | 63  |
| 5  |     | mu 1 subunit        | 41 | 62 | 36 | 13 | 76 | 30 | 490 |     | 49  | w | 64  | 32  |
|    |     |                     | 7  |    | 3  | 4  | 2  | 4  | 48  |     | 04  | n | 07  | 74  |
|    |     |                     |    |    |    |    |    |    |     |     | 8   |   | 89  | 04  |

|    |      |                                           |    |    |    |    |    |    |     |     |     |   |     |     |
|----|------|-------------------------------------------|----|----|----|----|----|----|-----|-----|-----|---|-----|-----|
| 79 | TME  | Transmembrane protein 204                 | 6. | 6. | 6. | 7. | 7. | 6. | 2.2 | 1.1 | 2.2 | U | 0.0 | 0.6 |
| 65 | M20  |                                           | 16 | 67 | 00 | 91 | 78 | 73 | 909 | 959 | 90  | p | 111 | 63  |
| 2  | 4    |                                           | 76 | 77 | 11 | 35 | 54 | 54 | 299 | 333 | 92  |   | 16  | 32  |
|    |      |                                           |    | 1  | 9  |    |    |    | 3   | 33  | 99  |   | 19  | 74  |
|    |      |                                           |    |    |    |    |    |    |     | 3   |     |   | 8   | 04  |
| 18 | APL  | Apelin receptor                           | 3. | 4. | 4. | 7. | 6. | 4. | 3.6 | 1.8 | 3.6 | U | 0.0 | 0.6 |
| 7  | NR   |                                           | 58 | 89 | 48 | 58 | 01 | 99 | 843 | 814 | 84  | p | 23  | 63  |
|    |      |                                           | 27 | 16 | 41 | 70 | 80 | 77 | 837 | 233 | 38  |   | 53  | 32  |
|    |      |                                           | 6  | 7  | 1  | 6  | 3  | 2  | 47  | 33  | 37  |   | 57  | 74  |
|    |      |                                           |    |    |    |    |    |    |     | 47  |     |   | 48  | 04  |
| 79 | TFPI | Tissue factor pathway inhibitor 2         | 3. | 3. | 2. | 4. | 4. | 4. | 1.9 | 0.9 | 1.9 | U | 0.0 | 0.6 |
| 80 | 2    |                                           | 53 | 64 | 96 | 00 | 49 | 46 | 195 | 407 | 19  | p | 03  | 63  |
|    |      |                                           | 32 | 31 | 72 | 64 | 25 | 69 | 436 | 633 | 54  |   | 94  | 32  |
|    |      |                                           | 7  | 4  | 7  | 8  | 8  | 1  | 05  | 33  | 36  |   | 19  | 74  |
|    |      |                                           |    |    |    |    |    |    |     | 05  |     |   | 98  | 04  |
| 74 | VIM  | Vimentin                                  | 9. | 9. | 10 | 12 | 11 | 10 | 3.0 | 1.6 | 3.0 | U | 0.0 | 0.6 |
| 31 |      |                                           | 18 | 88 | .7 | .3 | .7 | .6 | 752 | 207 | 75  | p | 17  | 63  |
|    |      |                                           | 32 | 89 | 68 | 33 | 37 | 32 | 563 | 066 | 25  |   | 97  | 32  |
|    |      |                                           | 5  | 6  | 45 | 22 | 5  | 06 | 28  | 67  | 63  |   | 18  | 74  |
|    |      |                                           |    |    |    |    |    |    |     | 28  |     |   | 01  | 04  |
| 28 | CLE  | C-type lectin domain family 18, member C  | 6. | 6. | 6. | 4. | 5. | 5. | -2. | -1. | 2.1 | D | 0.0 | 0.6 |
| 39 | C18C |                                           | 87 | 64 | 15 | 97 | 72 | 75 | 110 | 077 | 10  | o | 07  | 63  |
| 71 |      |                                           | 89 | 41 | 82 | 01 | 35 | 50 | 439 | 543 | 43  | w | 09  | 32  |
|    |      |                                           | 9  | 8  |    | 8  | 3  | 3  | 297 | 333 | 92  | n | 44  | 74  |
|    |      |                                           |    |    |    |    |    |    |     | 97  |     |   | 89  | 04  |
| 55 | STR  | Spermatid perinuclear RNA binding protein | 8. | 7. | 7. | 6. | 7. | 7. | -1. | -0. | 1.5 | D | 0.0 | 0.6 |
| 34 | BP   |                                           | 39 | 62 | 91 | 92 | 54 | 54 | 555 | 637 | 55  | o | 48  | 63  |
| 2  |      |                                           | 09 | 23 | 23 | 83 | 41 | 14 | 375 | 263 | 37  | w | 57  | 32  |
|    |      |                                           | 4  | 6  | 8  | 6  |    | 3  | 947 | 333 | 59  | n | 02  | 74  |

|    |      |                      |    |    |    |    |    |    |     |     |     |   |     |     |
|----|------|----------------------|----|----|----|----|----|----|-----|-----|-----|---|-----|-----|
|    |      |                      |    |    |    |    |    |    |     |     | 47  |   | 68  | 04  |
| 90 | OTU  | OTU                  | 6. | 5. | 5. | 5. | 5. | 5. | -1. | -0. | 1.5 | D | 0.0 | 0.6 |
| 26 | LIN  | deubiquitinase with  | 26 | 89 | 76 | 27 | 36 | 45 | 533 | 616 | 33  | o | 11  | 63  |
| 8  |      | linear linkage       | 94 | 57 | 93 | 32 | 11 | 08 | 101 | 453 | 10  | w | 43  | 32  |
|    |      | specificity          | 8  | 4  | 8  | 2  | 7  | 5  | 626 | 333 | 16  | n | 34  | 74  |
|    |      |                      |    |    |    |    |    |    |     |     | 26  |   | 04  | 04  |
| 65 | RAS  | RAS-like, family     | 3. | 3. | 2. | 5. | 3. | 3. | 2.2 | 1.1 | 2.2 | U | 0.0 | 0.6 |
| 99 | L11B | 11, member B         | 13 | 42 | 99 | 51 | 94 | 52 | 037 | 399 | 03  | p | 48  | 63  |
| 7  |      |                      | 61 | 21 | 69 | 21 | 01 | 28 | 796 | 8   | 77  |   | 39  | 32  |
|    |      |                      | 1  | 2  | 5  | 8  | 1  | 3  | 81  |     | 96  |   | 40  | 74  |
|    |      |                      |    |    |    |    |    |    |     |     | 81  |   | 47  | 04  |
| 29 | PDZ  | PDZ domain           | 2. | 3. | 2. | 4. | 3. | 4. | 2.0 | 1.0 | 2.0 | U | 0.0 | 0.6 |
| 95 | RN4  | containing ring      | 54 | 95 | 82 | 68 | 69 | 09 | 668 | 474 | 66  | p | 34  | 63  |
| 1  |      | finger 4             | 98 | 32 | 77 | 44 | 86 | 01 | 590 | 4   | 85  |   | 99  | 32  |
|    |      |                      | 5  | 3  | 9  | 7  | 2  |    | 4   |     | 90  |   | 65  | 74  |
|    |      |                      |    |    |    |    |    |    |     |     | 4   |   | 78  | 04  |
| 29 | CXC  | Chemokine            | 4. | 4. | 4. | 7. | 7. | 4. | 4.2 | 2.0 | 4.2 | U | 0.0 | 0.6 |
| 19 | L1   | (C-X-C motif)        | 31 | 57 | 68 | 63 | 78 | 37 | 191 | 769 | 19  | p | 45  | 63  |
|    |      | ligand 1             | 25 | 18 | 50 | 29 | 86 | 86 | 137 | 4   | 11  |   | 30  | 32  |
|    |      | (melanoma growth     | 7  | 1  | 6  | 4  | 5  | 7  | 97  |     | 37  |   | 94  | 74  |
|    |      | stimulating          |    |    |    |    |    |    |     |     | 97  |   | 39  | 04  |
|    |      | activity, $\alpha$ ) |    |    |    |    |    |    |     |     |     |   |     |     |
| 54 | POU  | POU class 2          | 8. | 9. | 8. | 6. | 7. | 7. | -3. | -1. | 3.8 | D | 0.0 | 0.6 |
| 50 | 2AF1 | associating factor 1 | 51 | 54 | 97 | 32 | 37 | 48 | 861 | 949 | 61  | o | 01  | 63  |
|    |      |                      | 88 | 58 | 05 | 26 | 61 | 90 | 362 | 11  | 36  | w | 43  | 32  |
|    |      |                      | 4  | 1  |    | 9  | 2  | 1  | 502 |     | 25  | n | 83  | 74  |
|    |      |                      |    |    |    |    |    |    |     |     | 02  |   | 26  | 04  |
| 30 | GZM  | Granzyme K           | 3. | 4. | 4. | 5. | 5. | 5. | 2.2 | 1.1 | 2.2 | U | 0.0 | 0.6 |
| 03 | K    |                      | 74 | 98 | 04 | 58 | 16 | 60 | 870 | 935 | 87  | p | 08  | 63  |

|    |     |                     |    |    |    |    |    |    |     |     |     |   |     |     |
|----|-----|---------------------|----|----|----|----|----|----|-----|-----|-----|---|-----|-----|
|    |     |                     | 60 | 42 | 11 | 37 | 57 | 24 | 903 | 133 | 09  |   | 12  | 32  |
|    |     |                     | 6  | 5  | 8  | 9  | 5  | 9  | 08  | 33  | 03  |   | 68  | 74  |
|    |     |                     |    |    |    |    |    |    |     |     | 08  |   | 18  | 04  |
| 57 | TWS | Twisted             | 6. | 6. | 6. | 7. | 7. | 7. | 1.5 | 0.6 | 1.5 | U | 0.0 | 0.6 |
| 04 | G1  | gastrulation BMP    | 89 | 49 | 67 | 95 | 03 | 08 | 915 | 704 | 91  | p | 47  | 63  |
| 5  |     | signaling           | 89 | 30 | 12 | 31 | 55 | 58 | 399 | 233 | 53  |   | 03  | 32  |
|    |     | modulator 1         | 9  | 9  | 1  | 7  | 4  | 5  | 08  | 33  | 99  |   | 33  | 74  |
|    |     |                     |    |    |    |    |    |    |     |     | 08  |   | 67  | 04  |
| 22 | POM | POM121 and ZP3      | 5. | 6. | 7. | 5. | 5. | 4. | -2. | -1. | 2.2 | D | 0.0 | 0.6 |
| 93 | ZP3 | fusion              | 40 | 60 | 05 | 39 | 34 | 79 | 265 | 179 | 65  | o | 26  | 63  |
| 2  |     |                     | 74 | 32 | 95 | 11 | 05 | 99 | 024 | 526 | 02  | w | 50  | 32  |
|    |     |                     | 9  | 5  | 6  | 7  | 6  | 9  | 518 | 667 | 45  | n | 29  | 74  |
|    |     |                     |    |    |    |    |    |    |     |     | 18  |   | 38  | 04  |
| 10 | COR | Corin, serine       | 4. | 5. | 5. | 6. | 5. | 6. | 2.2 | 1.1 | 2.2 | U | 0.0 | 0.6 |
| 69 | IN  | peptidase           | 71 | 37 | 53 | 37 | 84 | 88 | 327 | 588 | 32  | p | 09  | 63  |
| 9  |     |                     | 78 | 07 | 63 | 39 | 54 | 20 | 318 | 1   | 73  |   | 09  | 32  |
|    |     |                     | 2  | 6  | 7  |    | 1  | 7  | 58  |     | 18  |   | 23  | 74  |
|    |     |                     |    |    |    |    |    |    |     |     | 58  |   | 57  | 04  |
| 37 | KCN | Potassium channel,  | 5. | 5. | 5. | 3. | 4. | 5. | -1. | -0. | 1.8 | D | 0.0 | 0.6 |
| 51 | D2  | voltage gated Shal  | 44 | 48 | 44 | 83 | 69 | 28 | 805 | 852 | 05  | o | 42  | 63  |
|    |     | related subfamily   | 57 | 50 | 57 | 20 | 72 | 92 | 852 | 68  | 85  | w | 46  | 32  |
|    |     | D, member 2         | 5  | 1  | 5  | 2  | 5  |    | 425 |     | 24  | n | 03  | 74  |
|    |     |                     |    |    |    |    |    |    |     |     | 25  |   | 85  | 04  |
| 76 | ZNF | Zinc finger protein | 8. | 7. | 7. | 6. | 7. | 7. | -1. | -0. | 1.7 | D | 0.0 | 0.6 |
| 20 | 69  | 69                  | 55 | 53 | 86 | 53 | 39 | 49 | 794 | 843 | 94  | o | 47  | 63  |
|    |     |                     | 97 | 92 | 61 | 76 | 91 | 84 | 132 | 286 | 13  | w | 55  | 32  |
|    |     |                     | 5  | 1  | 2  | 4  | 4  | 4  | 782 | 667 | 27  | n | 74  | 74  |
|    |     |                     |    |    |    |    |    |    |     |     | 82  |   | 24  | 04  |
| 74 | MYR | Myelin regulatory   | 10 | 10 | 10 | 9. | 9. | 9. | -1. | -0. | 1.5 | D | 0.0 | 0.6 |



|                |           |                                           |                     |                     |                     |                     |                     |                     |                          |                          |                             |                  |                             |                             |
|----------------|-----------|-------------------------------------------|---------------------|---------------------|---------------------|---------------------|---------------------|---------------------|--------------------------|--------------------------|-----------------------------|------------------|-----------------------------|-----------------------------|
| 5              | F         | factor                                    | .4<br>63<br>4       | .0<br>92<br>71      | .2<br>72<br>36      | 41<br>42<br>7       | 80<br>37<br>6       | 81<br>55            | 513<br>945<br>565        | 598<br>313<br>333        | 13<br>94<br>55<br>65        | o<br>w<br>n      | 13<br>92<br>44<br>6         | 63<br>32<br>74<br>04        |
| 11<br>07<br>5  | STM<br>N2 | Stathmin 2                                | 2.<br>81<br>17<br>8 | 3.<br>41<br>03<br>8 | 3.<br>60<br>17<br>1 | 5.<br>66<br>10<br>8 | 6.<br>88<br>42      | 4.<br>11<br>81<br>9 | 4.8<br>563<br>306<br>97  | 2.2<br>798<br>666<br>67  | 4.8<br>56<br>33<br>06<br>97 | U<br>p           | 0.0<br>09<br>23<br>97<br>04 | 0.6<br>63<br>32<br>74<br>04 |
| 22<br>12<br>23 | CES5<br>A | Carboxylesterase<br>5A                    | 4.<br>99<br>09<br>5 | 4.<br>49<br>13<br>7 | 5.<br>55<br>35<br>1 | 2.<br>80<br>94<br>2 | 3.<br>09<br>62<br>8 | 4.<br>36<br>14<br>9 | -3.<br>009<br>547<br>666 | -1.<br>589<br>546<br>667 | 3.0<br>09<br>54<br>76<br>66 | D<br>o<br>w<br>n | 0.0<br>08<br>80<br>00<br>89 | 0.6<br>63<br>32<br>74<br>04 |
| 60<br>67<br>7  | CEL<br>F6 | CUGBP, Elav-like<br>family member 6       | 5.<br>53<br>83<br>8 | 5.<br>06<br>95<br>5 | 5.<br>32<br>74<br>4 | 4.<br>61<br>98<br>9 | 4.<br>56<br>68      | 4.<br>95<br>14<br>8 | -1.<br>514<br>736<br>31  | -0.<br>599<br>066<br>667 | 1.5<br>14<br>73<br>63<br>1  | D<br>o<br>w<br>n | 0.0<br>15<br>11<br>42<br>15 | 0.6<br>63<br>32<br>74<br>04 |
| 14<br>66       | CSR<br>P2 | Cysteine and<br>glycine rich protein<br>2 | 4.<br>21<br>27<br>1 | 5.<br>94<br>20<br>5 | 4.<br>57<br>11<br>3 | 7.<br>54<br>26<br>1 | 7.<br>21<br>24<br>2 | 5.<br>57<br>04<br>5 | 3.6<br>465<br>445        | 1.8<br>665<br>3          | 3.6<br>46<br>54<br>45       | U<br>p           | 0.0<br>20<br>15<br>16<br>71 | 0.6<br>63<br>32<br>74<br>04 |
| 90<br>99<br>0  | KIFC<br>2 | Kinesin family<br>member C2               | 7.<br>41<br>71<br>4 | 7.<br>27<br>59<br>6 | 6.<br>81<br>59<br>9 | 6.<br>18<br>98<br>9 | 6.<br>54<br>7<br>5  | 6.<br>78<br>40<br>5 | -1.<br>583<br>027<br>883 | -0.<br>662<br>686<br>667 | 1.5<br>83<br>02<br>78<br>83 | D<br>o<br>w<br>n | 0.0<br>25<br>59<br>71<br>68 | 0.6<br>63<br>32<br>74<br>04 |

|    |      |                      |    |    |    |    |    |    |     |     |     |   |     |     |
|----|------|----------------------|----|----|----|----|----|----|-----|-----|-----|---|-----|-----|
| 25 | FAM  | Family with          | 3. | 3. | 3. | 5. | 5. | 3. | 2.6 | 1.4 | 2.6 | U | 0.0 | 0.6 |
| 81 | 19A5 | sequence similarity  | 26 | 87 | 40 | 68 | 22 | 87 | 616 | 123 | 61  | p | 15  | 63  |
| 7  |      | 19 (chemokine        | 75 | 14 | 54 | 13 | 78 | 23 | 975 | 466 | 69  |   | 91  | 32  |
|    |      | (C-C motif)-like),   | 9  |    | 6  |    | 3  | 6  | 87  | 67  | 75  |   | 45  | 74  |
|    |      | member A5            |    |    |    |    |    |    |     |     | 87  |   | 96  | 04  |
| 63 | CEA  | Carcinoembryonic     | 5. | 5. | 5. | 6. | 5. | 5. | 1.6 | 0.6 | 1.6 | U | 0.0 | 0.6 |
| 4  | CAM  | antigen-related cell | 26 | 21 | 52 | 35 | 99 | 69 | 000 | 781 | 00  | p | 14  | 63  |
|    | 1    | adhesion molecule    | 2  | 46 | 83 | 19 | 49 | 24 | 755 | 4   | 07  |   | 87  | 32  |
|    |      | 1 (biliary           |    | 2  | 1  | 4  | 3  | 8  | 21  |     | 55  |   | 92  | 74  |
|    |      | glycoprotein)        |    |    |    |    |    |    |     |     | 21  |   | 53  | 04  |
| 28 | IGK  | Immunoglobulin κ     | 9. | 10 | 10 | 10 | 13 | 12 | 4.3 | 2.1 | 4.3 | U | 0.0 | 0.6 |
| 92 | V2-2 | variable 2-24        | 98 | .5 | .0 | .8 | .1 | .9 | 213 | 114 | 21  | p | 07  | 63  |
| 3  | 4    |                      | 69 | 22 | 69 | 78 | 14 | 19 | 437 | 8   | 34  |   | 52  | 32  |
|    |      |                      | 2  | 86 | 24 | 67 | 85 | 94 | 57  |     | 37  |   | 56  | 74  |
|    |      |                      |    |    |    |    |    |    |     |     | 57  |   | 87  | 04  |
| 19 | VST  | V-set and            | 2. | 3. | 3. | 5. | 3. | 3. | 2.2 | 1.1 | 2.2 | U | 0.0 | 0.6 |
| 67 | M4   | transmembrane        | 99 | 68 | 38 | 61 | 97 | 96 | 369 | 615 | 36  | p | 37  | 63  |
| 40 |      | domain containing    | 75 | 39 | 50 | 38 | 04 | 68 | 298 | 2   | 92  |   | 21  | 32  |
|    |      | 4                    | 9  | 9  | 2  | 8  | 3  | 5  | 28  |     | 98  |   | 97  | 74  |
|    |      |                      |    |    |    |    |    |    |     |     | 28  |   | 57  | 04  |
| 28 | IGLJ | Immunoglobulin       | 4. | 4. | 4. | 5. | 6. | 5. | 2.1 | 1.1 | 2.1 | U | 0.0 | 0.6 |
| 83 | 3    | lambda joining 3     | 55 | 63 | 74 | 04 | 59 | 63 | 663 | 152 | 66  | p | 18  | 63  |
| 1  |      |                      | 85 | 56 | 19 | 92 | 54 | 71 | 104 | 4   | 31  |   | 80  | 32  |
|    |      |                      | 3  | 7  |    | 9  | 3  |    | 38  |     | 04  |   | 78  | 74  |
|    |      |                      |    |    |    |    |    |    |     |     | 38  |   | 32  | 04  |
| 51 | EMC  | Endomucin            | 4. | 4. | 5. | 7. | 7. | 5. | 4.0 | 2.0 | 4.0 | U | 0.0 | 0.6 |
| 70 | N    |                      | 33 | 60 | 47 | 43 | 70 | 33 | 588 | 210 | 58  | p | 15  | 63  |
| 5  |      |                      | 46 | 27 | 08 | 81 | 31 | 00 | 189 | 6   | 81  |   | 74  | 32  |
|    |      |                      | 6  | 5  | 2  | 9  | 5  | 7  | 84  |     | 89  |   | 85  | 74  |

|                |             |                                                                                                |                      |                      |                      |                     |                     |                     |                          |                          |                             |                  |                             |                             |
|----------------|-------------|------------------------------------------------------------------------------------------------|----------------------|----------------------|----------------------|---------------------|---------------------|---------------------|--------------------------|--------------------------|-----------------------------|------------------|-----------------------------|-----------------------------|
|                |             |                                                                                                |                      |                      |                      |                     |                     |                     |                          |                          | 84                          |                  | 37                          | 04                          |
| 53<br>37       | PLD<br>1    | Phospholipase D1                                                                               | 10<br>.9<br>78<br>8  | 10<br>.2<br>67<br>72 | 10<br>.8<br>69<br>83 | 9.<br>13<br>39<br>7 | 9.<br>83<br>91<br>4 | 10<br>.3<br>56<br>9 | -1.<br>903<br>665<br>5   | -0.<br>928<br>78         | 1.9<br>03<br>66<br>55       | D<br>o<br>w<br>n | 0.0<br>29<br>74<br>58<br>95 | 0.6<br>63<br>32<br>74<br>04 |
| 57<br>55<br>6  | SEM<br>A6A  | Sema domain,<br>transmembrane<br>domain (TM), and<br>cytoplasmic<br>domain,<br>(semaphorin) 6A | 10<br>.3<br>35<br>36 | 10<br>.0<br>69<br>41 | 9.<br>82<br>64<br>7  | 8.<br>16<br>72<br>8 | 9.<br>00<br>46<br>1 | 9.<br>96<br>88<br>7 | -2.<br>042<br>250<br>732 | -1.<br>030<br>16<br>732  | 2.0<br>42<br>25<br>07<br>32 | D<br>o<br>w<br>n | 0.0<br>47<br>53<br>06<br>67 | 0.6<br>63<br>32<br>74<br>04 |
| 12<br>54<br>88 | TTC<br>39C  | Tetratricopeptide<br>repeat domain 39C                                                         | 8.<br>28<br>21<br>3  | 8.<br>01<br>73<br>6  | 8.<br>02<br>53<br>9  | 6.<br>02<br>47<br>2 | 7.<br>16<br>64<br>1 | 7.<br>91<br>37<br>2 | -2.<br>104<br>304<br>282 | -1.<br>073<br>343<br>333 | 2.1<br>04<br>30<br>42<br>82 | D<br>o<br>w<br>n | 0.0<br>45<br>46<br>37<br>34 | 0.6<br>63<br>32<br>74<br>04 |
| 11<br>15<br>6  | PTP4<br>A3  | Protein tyrosine<br>phosphatase type<br>IVA, member 3                                          | 5.<br>98<br>05<br>4  | 6.<br>39<br>82<br>4  | 6.<br>14<br>53       | 7.<br>21<br>72<br>8 | 7.<br>35<br>19<br>8 | 6.<br>23<br>46<br>7 | 1.6<br>934<br>319<br>34  | 0.7<br>599<br>5<br>34    | 1.6<br>93<br>43<br>19<br>34 | U<br>p           | 0.0<br>45<br>92<br>77<br>99 | 0.6<br>63<br>32<br>74<br>04 |
| 13<br>24<br>30 | PAB<br>PC4L | Poly(A) binding<br>protein,<br>cytoplasmic 4-like                                              | 3.<br>39<br>95<br>2  | 4.<br>06<br>64<br>1  | 3.<br>79<br>05<br>4  | 4.<br>62<br>44<br>6 | 4.<br>58<br>39<br>7 | 4.<br>09<br>72<br>7 | 1.6<br>055<br>600<br>97  | 0.6<br>830<br>766<br>67  | 1.6<br>05<br>56<br>00<br>97 | U<br>p           | 0.0<br>18<br>01<br>10<br>07 | 0.6<br>63<br>32<br>74<br>04 |
| 50<br>69       | PAPP<br>A   | Pregnancy-associat<br>ed plasma protein                                                        | 3.<br>99             | 4.<br>61             | 4.<br>17             | 5.<br>91            | 5.<br>23            | 4.<br>52            | 1.9<br>514               | 0.9<br>645               | 1.9<br>51                   | U<br>p           | 0.0<br>30                   | 0.6<br>63                   |

|                |                 |                                                |                     |                     |                     |                      |                     |                     |                         |                         |                             |        |                             |                             |
|----------------|-----------------|------------------------------------------------|---------------------|---------------------|---------------------|----------------------|---------------------|---------------------|-------------------------|-------------------------|-----------------------------|--------|-----------------------------|-----------------------------|
|                |                 | A, pappalysin 1                                | 70<br>5             | 03<br>8             | 16<br>5             | 40<br>3              | 83<br>3             | 04<br>7             | 998<br>25               | 833<br>33               | 49<br>98<br>25              |        | 03<br>21<br>94              | 32<br>74<br>04              |
| 16<br>11<br>98 | CLE<br>C14<br>A | C-type lectin<br>domain family 14,<br>member A | 5.<br>25<br>36      | 4.<br>81<br>34      | 5.<br>55<br>29      | 6.<br>95<br>53       | 7.<br>12<br>02      | 5.<br>67<br>44      | 2.5<br>966<br>411       | 1.3<br>766<br>466       | 2.5<br>96<br>64             | U<br>p | 0.0<br>11<br>47<br>69<br>5  | 0.6<br>63<br>32<br>74<br>04 |
| 10<br>10<br>0  | TSPA<br>N2      | Tetraspanin 2                                  | 3.<br>32<br>12<br>9 | 4.<br>32<br>77<br>6 | 3.<br>14<br>63<br>6 | 6.<br>12<br>23<br>9  | 4.<br>69<br>27<br>8 | 4.<br>15<br>36<br>1 | 2.6<br>228<br>282<br>4  | 1.3<br>911<br>233<br>33 | 2.6<br>22<br>82<br>82<br>4  | U<br>p | 0.0<br>35<br>51<br>92       | 0.6<br>63<br>32<br>74<br>04 |
| 15<br>20<br>07 | GLIP<br>R2      | GLI<br>pathogenesis-relate<br>d 2              | 4.<br>57<br>52<br>5 | 5.<br>06<br>05<br>6 | 4.<br>94<br>51<br>4 | 7.<br>06<br>60<br>9  | 5.<br>52<br>36<br>5 | 5.<br>33<br>43<br>1 | 2.1<br>649<br>994<br>62 | 1.1<br>143<br>666<br>67 | 2.1<br>64<br>99<br>94<br>62 | U<br>p | 0.0<br>42<br>06<br>60<br>12 | 0.6<br>63<br>32<br>74<br>04 |
| 30<br>2        | ANX<br>A2       | Annexin A2                                     | 9.<br>57<br>07<br>1 | 9.<br>10<br>10<br>2 | 9.<br>85<br>70<br>3 | 10<br>.6<br>73<br>15 | 10<br>.9<br>87<br>5 | 9.<br>69<br>46<br>4 | 1.9<br>214<br>250<br>04 | 0.9<br>421<br>766<br>67 | 1.9<br>21<br>42<br>50<br>04 | U<br>p | 0.0<br>35<br>45<br>28<br>06 | 0.6<br>63<br>32<br>74<br>04 |
| 56<br>90<br>7  | SPIR<br>E1      | Spire-type actin<br>nucleation factor 1        | 4.<br>71<br>86<br>9 | 5.<br>05<br>08      | 4.<br>79<br>13<br>7 | 5.<br>55<br>96<br>9  | 5.<br>42<br>90<br>3 | 5.<br>42<br>52<br>9 | 1.5<br>344<br>447<br>14 | 0.6<br>177<br>166<br>67 | 1.5<br>34<br>44<br>47<br>14 | U<br>p | 0.0<br>05<br>21<br>27<br>78 | 0.6<br>63<br>32<br>74<br>04 |
| 37             | MAL             | Metastasis                                     | 7.                  | 7.                  | 7.                  | 8.                   | 8.                  | 8.                  | 1.8                     | 0.8                     | 1.8                         | U      | 0.0                         | 0.6                         |

|    |      |                      |    |    |    |    |    |    |     |     |     |    |     |     |    |
|----|------|----------------------|----|----|----|----|----|----|-----|-----|-----|----|-----|-----|----|
| 89 | AT1  | associated lung      | 58 | 57 | 48 | 40 | 57 | 19 | 010 | 488 | 01  | p  | 01  | 63  |    |
| 38 |      | adenocarcinoma       | 17 | 15 | 15 | 54 | 94 | 65 | 605 | 466 | 06  |    | 20  | 32  |    |
|    |      | transcript           | 1  | 5  | 9  | 2  | 8  |    | 2   | 28  | 67  | 05 | 16  | 74  |    |
|    |      | (non-protein coding) |    |    |    |    |    |    |     |     |     | 28 | 76  | 04  |    |
| 57 | PTP  | Protein tyrosine     | 11 | 11 | 11 | 10 | 10 | 10 | -1. | -0. | 1.6 | D  | 0.0 | 0.6 |    |
| 92 | RF   | phosphatase,         | .2 | .1 | .1 | .0 | .5 | .9 | 608 | 685 | 08  | o  | 25  | 63  |    |
|    |      | receptor type, F     | 99 | 72 | 71 | 48 | 63 | 74 | 430 | 653 | 43  | w  | 19  | 32  |    |
|    |      |                      | 79 | 11 | 16 | 73 | 27 | 1  | 204 | 333 | 02  | n  | 71  | 74  |    |
|    |      |                      |    |    |    |    |    |    |     |     | 04  |    | 88  | 04  |    |
| 42 | MAP  | Mitogen-activated    | 7. | 6. | 6. | 7. | 7. | 7. | 1.5 | 0.6 | 1.5 | U  | 0.0 | 0.6 |    |
| 17 | 3K5  | protein kinase       | 20 | 92 | 87 | 58 | 99 | 27 | 337 | 170 | 33  | p  | 27  | 63  |    |
|    |      | kinase kinase 5      | 59 | 45 | 02 | 01 | 41 | 74 | 251 | 4   | 72  |    | 92  | 32  |    |
|    |      |                      | 2  |    |    | 9  | 1  | 4  | 83  |     | 51  |    | 61  | 74  |    |
|    |      |                      |    |    |    |    |    |    |     |     | 83  |    | 19  | 04  |    |
| 80 | SLC1 | Solute carrier       | 9. | 8. | 7. | 6. | 5. | 8. | -2. | -1. | 2.7 | D  | 0.0 | 0.6 |    |
| 70 | 9A3  | family               | 19 | 04 | 38 | 80 | 89 | 84 | 06  | 778 | 474 | 78 | o   | 36  | 63 |
| 4  |      | (thiamine            |    | 34 | 23 | 05 | 09 | 79 | 51  | 160 | 13  | 16 | w   | 40  | 32 |
|    |      | transporter),        |    | 8  | 7  | 5  |    | 3  | 8   | 598 |     | 05 | n   | 39  | 74 |
|    |      | member 3             |    |    |    |    |    |    |     |     |     | 98 |     | 07  | 04 |
| 10 | LOC  | Uncharacterized      | 7. | 7. | 7. | 6. | 6. | 7. | -1. | -0. | 1.8 | D  | 0.0 | 0.6 |    |
| 19 | 1019 | LOC101928168         | 67 | 55 | 75 | 91 | 23 | 23 | 822 | 866 | 22  | o  | 13  | 63  |    |
| 28 | 2816 |                      | 79 | 51 | 39 | 09 | 97 | 80 | 754 | 12  | 75  | w  | 69  | 32  |    |
| 16 | 8    |                      | 5  | 5  | 4  | 1  | 6  | 1  | 167 |     | 41  | n  | 54  | 74  |    |
| 8  |      |                      |    |    |    |    |    |    |     |     | 67  |    | 28  | 04  |    |
| 76 | CA3  | Carbonic             | 6. | 5. | 5. | 4. | 4. | 5. | -1. | -0. | 1.8 | D  | 0.0 | 0.6 |    |
| 1  |      | anhydrase III        | 26 | 61 | 84 | 69 | 88 | 47 | 849 | 886 | 49  | o  | 12  | 63  |    |
|    |      |                      | 94 | 78 | 01 | 97 | 95 | 73 | 245 | 936 | 24  | w  | 24  | 32  |    |
|    |      |                      | 7  | 9  | 4  | 7  | 3  | 9  | 374 | 667 | 53  | n  | 04  | 74  |    |

|                |             |                                                                                                                    |                     |                     |                     |                     |                     |                      |                          |                         |                             |                  |                             |                             |
|----------------|-------------|--------------------------------------------------------------------------------------------------------------------|---------------------|---------------------|---------------------|---------------------|---------------------|----------------------|--------------------------|-------------------------|-----------------------------|------------------|-----------------------------|-----------------------------|
|                |             |                                                                                                                    |                     |                     |                     |                     |                     |                      |                          |                         | 74                          |                  | 18                          | 04                          |
| 37<br>82       | KCN<br>N3   | Potassium channel,<br>calcium activated<br>intermediate/small<br>conductance<br>subfamily N $\alpha$ ,<br>member 3 | 4.<br>19<br>24<br>1 | 4.<br>90<br>44<br>7 | 4.<br>59<br>38<br>6 | 5.<br>02<br>89<br>9 | 5.<br>62<br>26<br>6 | 5.<br>32<br>84<br>57 | 1.6<br>971<br>373<br>33  | 0.7<br>631<br>033<br>73 | 1.6<br>97<br>13<br>73       | U<br>p           | 0.0<br>15<br>15<br>50       | 0.6<br>63<br>32<br>74       |
| 11<br>72<br>45 | HRA<br>SLS5 | HRAS like<br>suppressor family<br>member 5                                                                         | 4.<br>40<br>68<br>3 | 4.<br>68<br>35<br>6 | 5.<br>10<br>62<br>9 | 3.<br>66<br>39<br>2 | 4.<br>30<br>56<br>2 | 4.<br>38<br>55<br>2  | -1.<br>530<br>369<br>472 | -0.<br>613<br>88<br>88  | 1.5<br>30<br>36<br>94<br>72 | D<br>o<br>w<br>n | 0.0<br>49<br>21<br>40<br>88 | 0.6<br>63<br>32<br>74<br>04 |
| 98<br>39       | ZEB<br>2    | Zinc finger E-box<br>binding homeobox<br>2                                                                         | 5.<br>42<br>70<br>5 | 6.<br>91<br>85<br>2 | 6.<br>13<br>34<br>8 | 7.<br>99<br>13<br>6 | 7.<br>76<br>57<br>6 | 6.<br>92<br>05<br>1  | 2.6<br>381<br>501<br>3   | 1.3<br>995<br>266<br>67 | 2.6<br>38<br>15<br>01<br>3  | U<br>p           | 0.0<br>14<br>06<br>78<br>74 | 0.6<br>63<br>32<br>74<br>04 |
| 55<br>47       | PRC<br>P    | Prolylcarboxypepti<br>dase                                                                                         | 7.<br>52<br>16      | 7.<br>40<br>99<br>8 | 7.<br>93<br>60<br>9 | 8.<br>32<br>57<br>5 | 8.<br>28<br>85<br>3 | 8.<br>14<br>53<br>6  | 1.5<br>482<br>695<br>54  | 0.6<br>306<br>566<br>67 | 1.5<br>48<br>26<br>95<br>54 | U<br>p           | 0.0<br>11<br>94<br>95<br>26 | 0.6<br>63<br>32<br>74<br>04 |
| 61<br>96       | RPS6<br>KA2 | Ribosomal protein<br>S6 kinase, 90kda,<br>polypeptide 2                                                            | 6.<br>85<br>48<br>9 | 7.<br>73<br>28<br>6 | 7.<br>50<br>09<br>5 | 8.<br>25<br>35<br>3 | 8.<br>17<br>64<br>5 | 7.<br>76<br>55<br>4  | 1.6<br>270<br>666<br>31  | 0.7<br>022<br>733<br>33 | 1.6<br>27<br>06<br>66<br>31 | U<br>p           | 0.0<br>33<br>88<br>45<br>03 | 0.6<br>63<br>32<br>74<br>04 |
| 34<br>82       | CCL<br>15-C | CCL15-CCL14<br>readthrough (NMD                                                                                    | 7.<br>03            | 7.<br>60            | 7.<br>46            | 8.<br>16            | 8.<br>29            | 7.<br>51             | 1.5<br>378               | 0.6<br>209              | 1.5<br>37                   | U<br>p           | 0.0<br>49                   | 0.6<br>63                   |

|    |      |                      |    |    |    |    |    |    |     |     |     |   |     |     |
|----|------|----------------------|----|----|----|----|----|----|-----|-----|-----|---|-----|-----|
| 49 | CL14 | candidate)           | 81 | 72 | 46 | 17 | 75 | 35 | 377 | 033 | 83  |   | 95  | 32  |
|    |      |                      | 1  | 9  | 5  |    | 5  | 1  | 86  | 33  | 77  |   | 22  | 74  |
|    |      |                      |    |    |    |    |    |    |     |     | 86  |   | 04  | 04  |
| 10 | LOC  | Multidrug            | 7. | 7. | 7. | 6. | 6. | 6. | -1. | -0. | 1.8 | D | 0.0 | 0.6 |
| 53 | 1053 | resistance-associate | 42 | 06 | 51 | 07 | 38 | 99 | 803 | 850 | 03  | o | 15  | 63  |
| 69 | 6923 | d protein 6          | 96 | 80 | 23 | 26 | 87 | 57 | 717 | 973 | 71  | w | 50  | 32  |
| 23 | 9    |                      | 8  | 4  | 4  | 4  | 5  | 5  | 417 | 333 | 74  | n | 61  | 74  |
| 9  |      |                      |    |    |    |    |    |    |     |     | 17  |   | 17  | 04  |
| 10 | BAS  | Brain abundant,      | 5. | 7. | 6. | 9. | 7. | 7. | 2.7 | 1.4 | 2.7 | U | 0.0 | 0.6 |
| 40 | P1   | membrane attached    | 49 | 38 | 49 | 01 | 21 | 52 | 512 | 600 | 51  | p | 46  | 63  |
| 9  |      | signal protein 1     | 18 | 60 | 40 | 62 | 24 | 35 | 552 | 9   | 25  |   | 62  | 32  |
|    |      |                      | 2  | 3  | 7  | 2  | 2  | 5  | 63  |     | 52  |   | 68  | 74  |
|    |      |                      |    |    |    |    |    |    |     |     | 63  |   | 02  | 04  |
| 20 | CC2  | Coiled-coil and C2   | 5. | 5. | 5. | 4. | 5. | 4. | -1. | -0. | 1.5 | D | 0.0 | 0.6 |
| 00 | D1B  | domain containing    | 76 | 72 | 59 | 95 | 30 | 89 | 553 | 635 | 53  | o | 07  | 63  |
| 14 |      | 1B                   | 07 | 11 | 01 | 86 | 76 | 93 | 425 | 453 | 42  | w | 02  | 32  |
|    |      |                      |    | 6  | 4  | 6  |    | 8  | 801 | 333 | 58  | n | 89  | 74  |
|    |      |                      |    |    |    |    |    |    |     |     | 01  |   | 02  | 04  |
| 64 | RAB  | RAB17, member        | 10 | 10 | 10 | 8. | 8. | 10 | -2. | -1. | 2.0 | D | 0.0 | 0.6 |
| 28 | 17   | RAS oncogene         | .5 | .2 | .0 | 70 | 84 | .0 | 099 | 070 | 99  | o | 23  | 63  |
| 4  |      | family               | 59 | 21 | 39 | 32 | 6  | 62 | 443 | 006 | 44  | w | 18  | 32  |
|    |      |                      | 87 | 96 | 88 | 9  |    | 4  | 069 | 667 | 30  | n | 41  | 74  |
|    |      |                      |    |    |    |    |    |    |     |     | 69  |   | 65  | 04  |
| 10 | CITE | Cbp/p300-interacti   | 4. | 4. | 5. | 5. | 5. | 5. | 1.7 | 0.8 | 1.7 | U | 0.0 | 0.6 |
| 37 | D2   | ng transactivator,   | 51 | 54 | 59 | 81 | 67 | 60 | 540 | 107 | 54  | p | 31  | 63  |
| 0  |      | with Glu/Asp rich    | 54 | 54 | 91 | 53 | 26 | 40 | 623 |     | 06  |   | 90  | 32  |
|    |      | carboxy-terminal     | 2  |    | 7  | 5  | 7  | 7  | 13  |     | 23  |   | 91  | 74  |
|    |      | domain, 2            |    |    |    |    |    |    |     |     | 13  |   |     | 04  |
| 17 | DST  | Destrin (actin       | 4. | 4. | 4. | 4. | 3. | 3. | -1. | -0. | 1.5 | D | 0.0 | 0.6 |

|    |      |                      |    |    |    |    |    |    |     |     |     |   |     |     |
|----|------|----------------------|----|----|----|----|----|----|-----|-----|-----|---|-----|-----|
| 12 | NP2  | depolymerizing       | 95 | 54 | 47 | 09 | 90 | 99 | 575 | 655 | 75  | o | 05  | 63  |
| 20 |      | factor) pseudogene   | 35 | 33 | 12 | 77 | 64 | 71 | 252 | 583 | 25  | w | 53  | 32  |
|    |      | 2                    | 7  | 3  | 2  | 7  | 8  | 2  | 756 | 333 | 27  | n | 73  | 74  |
|    |      |                      |    |    |    |    |    |    |     |     | 56  |   | 89  | 04  |
| 33 | ICA  | Intercellular        | 4. | 5. | 5. | 6. | 7. | 5. | 2.0 | 1.0 | 2.0 | U | 0.0 | 0.6 |
| 84 | M2   | adhesion molecule    | 95 | 57 | 75 | 30 | 15 | 87 | 235 | 168 | 23  | p | 26  | 63  |
|    |      | 2                    | 33 | 59 | 05 | 41 | 36 | 26 | 567 | 933 | 55  |   | 98  | 32  |
|    |      |                      |    | 3  | 4  | 3  | 6  | 6  | 83  | 33  | 67  |   | 73  | 74  |
|    |      |                      |    |    |    |    |    |    |     |     | 83  |   | 99  | 04  |
| 57 | PTP  | Protein tyrosine     | 8. | 7. | 7. | 6. | 6. | 6. | -1. | -0. | 1.8 | D | 0.0 | 0.6 |
| 74 | N3   | phosphatase,         | 26 | 25 | 29 | 54 | 90 | 58 | 898 | 924 | 98  | o | 16  | 63  |
|    |      | non-receptor type 3  | 08 | 94 | 37 | 87 | 31 | 74 | 570 | 913 | 57  | w | 77  | 32  |
|    |      |                      | 6  | 6  | 9  | 8  | 3  | 6  | 186 | 333 | 01  | n | 13  | 74  |
|    |      |                      |    |    |    |    |    |    |     |     | 86  |   | 39  | 04  |
| 57 | TSH  | Teashirt zinc finger | 3. | 4. | 3. | 6. | 4. | 5. | 2.9 | 1.5 | 2.9 | U | 0.0 | 0.6 |
| 61 | Z3   | homeobox 3           | 56 | 88 | 96 | 86 | 96 | 31 | 814 | 760 | 81  | p | 23  | 63  |
| 6  |      |                      | 36 | 90 | 47 | 94 | 52 | 08 | 621 | 2   | 46  |   | 61  | 32  |
|    |      |                      | 2  | 6  | 3  |    | 5  | 2  | 05  |     | 21  |   | 41  | 74  |
|    |      |                      |    |    |    |    |    |    |     |     | 05  |   | 64  | 04  |
| 46 | ATF3 | Activating           | 6. | 4. | 5. | 6. | 10 | 8. | 6.0 | 2.5 | 6.0 | U | 0.0 | 0.6 |
| 7  |      | transcription factor | 56 | 94 | 25 | 31 | .0 | 14 | 622 | 998 | 62  | p | 25  | 63  |
|    |      | 3                    | 29 | 03 | 55 | 73 | 95 | 53 | 919 | 633 | 29  |   | 04  | 32  |
|    |      |                      | 4  | 1  | 8  | 7  | 72 | 3  | 57  | 33  | 19  |   | 61  | 74  |
|    |      |                      |    |    |    |    |    |    |     |     | 57  |   | 76  | 04  |
| 11 | RNF  | Ring finger protein  | 5. | 5. | 5. | 6. | 6. | 5. | 1.9 | 0.9 | 1.9 | U | 0.0 | 0.6 |
| 23 | 24   | 24                   | 17 | 46 | 04 | 63 | 18 | 71 | 308 | 492 | 30  | p | 08  | 63  |
| 7  |      |                      | 91 | 47 | 76 | 78 | 37 | 76 | 195 | 133 | 81  |   | 12  | 32  |
|    |      |                      | 4  | 9  | 4  | 5  | 4  | 2  | 42  | 33  | 95  |   | 00  | 74  |
|    |      |                      |    |    |    |    |    |    |     |     | 42  |   | 13  | 04  |



|    |      |                     |    |    |    |    |    |    |     |     |     |   |     |     |
|----|------|---------------------|----|----|----|----|----|----|-----|-----|-----|---|-----|-----|
| 94 | FAD  | Fatty acid          | 5. | 6. | 5. | 7. | 6. | 5. | 1.9 | 0.9 | 1.9 | U | 0.0 | 0.6 |
| 15 | S2   | desaturase 2        | 04 | 11 | 22 | 11 | 14 | 94 | 236 | 438 | 23  | p | 47  | 63  |
|    |      |                     | 94 | 02 | 12 | 63 | 93 | 67 | 415 | 4   | 64  |   | 54  | 32  |
|    |      |                     | 9  | 7  | 1  | 7  | 4  | 8  | 59  |     | 15  |   | 38  | 74  |
|    |      |                     |    |    |    |    |    |    |     |     | 59  |   | 77  | 04  |
| 54 | FAM  | Family with         | 7. | 7. | 7. | 6. | 7. | 7. | -1. | -0. | 1.5 | D | 0.0 | 0.6 |
| 85 | 83E  | sequence similarity | 88 | 18 | 48 | 42 | 08 | 08 | 573 | 653 | 73  | o | 42  | 63  |
| 4  |      | 83 member E         | 25 | 77 | 23 | 20 | 71 | 15 | 510 | 986 | 51  | w | 73  | 32  |
|    |      |                     | 4  | 3  | 6  | 1  | 6  |    | 348 | 667 | 03  | n | 58  | 74  |
|    |      |                     |    |    |    |    |    |    |     |     | 48  |   | 81  | 04  |
| 79 | EPS8 | EPS8-like 3         | 10 | 10 | 10 | 9. | 9. | 10 | -1. | -0. | 1.7 | D | 0.0 | 0.6 |
| 57 | L3   |                     | .8 | .8 | .3 | 51 | 72 | .3 | 747 | 805 | 47  | o | 18  | 63  |
| 4  |      |                     | 26 | 29 | 99 | 49 | 98 | 94 | 206 | 05  | 20  | w | 03  | 32  |
|    |      |                     | 13 | 64 | 07 |    | 5  | 94 | 344 |     | 63  | n | 06  | 74  |
|    |      |                     |    |    |    |    |    |    |     |     | 44  |   | 34  | 04  |
| 84 | RAB  | RAB11 family        | 7. | 7. | 7. | 6. | 6. | 6. | -1. | -0. | 1.7 | D | 0.0 | 0.6 |
| 44 | 11FI | interacting protein | 55 | 47 | 25 | 10 | 90 | 95 | 716 | 779 | 16  | o | 19  | 63  |
| 0  | P4   | 4 (class II)        | 95 | 72 | 86 | 04 | 01 | 74 | 147 | 173 | 14  | w | 89  | 32  |
|    |      |                     | 7  | 8  | 9  | 5  | 2  | 5  | 236 | 333 | 72  | n | 32  | 74  |
|    |      |                     |    |    |    |    |    |    |     |     | 36  |   | 22  | 04  |
| 93 | SDR  | Short chain         | 5. | 5. | 5. | 4. | 4. | 5. | -1. | -0. | 1.5 | D | 0.0 | 0.6 |
| 51 | 42E1 | dehydrogenase/red   | 81 | 44 | 58 | 75 | 80 | 27 | 589 | 668 | 89  | o | 12  | 63  |
| 7  |      | uctase family 42E,  | 40 | 03 | 86 | 51 | 59 | 68 | 280 | 373 | 28  | w | 29  | 32  |
|    |      | member 1            | 2  | 7  | 8  | 7  | 8  |    | 013 | 333 | 00  | n | 15  | 74  |
|    |      |                     |    |    |    |    |    |    |     |     | 13  |   | 05  | 04  |
| 10 | MSH  | MSH5-SAPCD1         | 7. | 7. | 7. | 7. | 6. | 6. | -1. | -0. | 1.5 | D | 0.0 | 0.6 |
| 05 | 5-SA | readthrough (NMD    | 65 | 26 | 30 | 10 | 82 | 52 | 500 | 585 | 00  | o | 26  | 63  |
| 32 | PCD  | candidate)          | 11 | 02 | 47 | 70 | 43 | 80 | 607 | 546 | 60  | w | 58  | 32  |
| 73 | 1    |                     | 2  |    | 4  | 7  | 1  | 4  | 492 | 667 | 74  | n | 68  | 74  |

|    |       |                     |    |    |    |    |    |    |     |     |     |    |     |     |    |
|----|-------|---------------------|----|----|----|----|----|----|-----|-----|-----|----|-----|-----|----|
| 2  |       |                     |    |    |    |    |    |    |     |     |     | 92 |     | 01  | 04 |
| 11 | TM4   | Transmembrane 4     | 3. | 4. | 4. | 5. | 6. | 4. | 2.5 | 1.3 | 2.5 | U  | 0.0 | 0.6 |    |
| 64 | SF18  | L six family        | 42 | 45 | 94 | 93 | 12 | 75 | 184 | 325 | 18  | p  | 28  | 63  |    |
| 41 |       | member 18           | 05 | 62 | 03 | 27 | 69 | 50 | 335 | 266 | 43  |    | 61  | 32  |    |
|    |       |                     | 1  | 9  | 3  | 1  | 5  | 5  | 52  | 67  | 35  |    | 56  | 74  |    |
|    |       |                     |    |    |    |    |    |    |     |     | 52  |    | 96  | 04  |    |
| 13 | COL   | Collagen, type XV,  | 5. | 7. | 6. | 9. | 9. | 7. | 5.0 | 2.3 | 5.0 | U  | 0.0 | 0.6 |    |
| 06 | 15A1  | $\alpha$ 1          | 61 | 23 | 91 | 83 | 11 | 79 | 116 | 252 | 11  | p  | 06  | 63  |    |
|    |       |                     | 92 | 85 | 72 | 57 | 95 | 56 | 303 | 8   | 63  |    | 16  | 32  |    |
|    |       |                     | 7  | 6  |    | 6  | 1  |    | 23  |     | 03  |    | 55  | 74  |    |
|    |       |                     |    |    |    |    |    |    |     |     | 23  |    | 38  | 04  |    |
| 16 | FAM   | Family with         | 5. | 5. | 5. | 6. | 7. | 6. | 1.9 | 0.9 | 1.9 | U  | 0.0 | 0.6 |    |
| 52 | 171B  | sequence similarity | 96 | 76 | 57 | 94 | 22 | 08 | 757 | 824 | 75  | p  | 15  | 63  |    |
| 15 |       | 171 member B        | 51 | 56 | 02 | 16 | 53 | 13 | 859 | 266 | 78  |    | 00  | 32  |    |
|    |       |                     | 3  | 7  | 7  | 9  | 4  | 2  | 61  | 67  | 59  |    | 07  | 74  |    |
|    |       |                     |    |    |    |    |    |    |     |     | 61  |    | 76  | 04  |    |
| 54 | C1orf | Chromosome 1        | 7. | 7. | 7. | 6. | 6. | 6. | -1. | -0. | 1.5 | D  | 0.0 | 0.6 |    |
| 96 | 56    | open reading frame  | 16 | 12 | 11 | 60 | 11 | 88 | 514 | 599 | 14  | o  | 29  | 63  |    |
| 4  |       | 56                  | 81 | 15 | 11 | 61 | 14 | 61 | 732 | 063 | 73  | w  | 96  | 32  |    |
|    |       |                     | 1  | 7  | 5  | 3  | 1  |    | 81  | 333 | 28  | n  | 82  | 74  |    |
|    |       |                     |    |    |    |    |    |    |     |     | 1   |    | 56  | 04  |    |
| 95 | TP53  | Tumor protein p53   | 7. | 7. | 7. | 6. | 7. | 7. | -1. | -0. | 1.9 | D  | 0.0 | 0.6 |    |
| 37 | I11   | inducible protein   | 95 | 53 | 99 | 28 | 27 | 05 | 944 | 959 | 44  | o  | 12  | 63  |    |
|    |       | 11                  | 33 | 51 | 92 | 45 | 07 | 32 | 927 | 716 | 92  | w  | 38  | 32  |    |
|    |       |                     | 3  | 5  | 2  | 4  | 5  | 6  | 89  | 667 | 78  | n  | 19  | 74  |    |
|    |       |                     |    |    |    |    |    |    |     |     | 9   |    | 73  | 04  |    |
| 22 | NID2  | Nidogen 2           | 5. | 5. | 5. | 7. | 6. | 6. | 2.3 | 1.2 | 2.3 | U  | 0.0 | 0.6 |    |
| 79 |       |                     | 00 | 81 | 82 | 64 | 69 | 03 | 761 | 486 | 76  | p  | 23  | 63  |    |
| 5  |       |                     | 11 | 21 | 37 | 83 | 99 | 47 | 896 | 5   | 18  |    | 23  | 32  |    |

|    |      |                      |    |    |    |    |    |    |     |     |     |   |     |     |
|----|------|----------------------|----|----|----|----|----|----|-----|-----|-----|---|-----|-----|
|    |      |                      | 8  | 6  | 1  |    | 6  | 4  | 73  |     | 96  |   | 63  | 74  |
|    |      |                      |    |    |    |    |    |    |     |     | 73  |   | 96  | 04  |
| 10 | CFL2 | Cofilin 2 (muscle)   | 3. | 4. | 3. | 5. | 4. | 4. | 1.9 | 0.9 | 1.9 | U | 0.0 | 0.6 |
| 73 |      |                      | 91 | 05 | 86 | 76 | 24 | 65 | 190 | 404 | 19  | p | 36  | 63  |
|    |      |                      | 41 | 34 | 80 | 31 | 36 | 01 | 957 | 266 | 09  |   | 41  | 32  |
|    |      |                      | 8  | 2  | 9  | 8  | 9  |    | 13  | 67  | 57  |   | 96  | 74  |
|    |      |                      |    |    |    |    |    |    |     |     | 13  |   | 05  | 04  |
| 35 | JCH  | Joining chain of     | 6. | 6. | 6. | 7. | 9. | 9. | 4.4 | 2.1 | 4.4 | U | 0.0 | 0.6 |
| 12 | AIN  | multimeric iga and   | 68 | 68 | 64 | 28 | 46 | 69 | 198 | 439 | 19  | p | 08  | 63  |
|    |      | igm                  | 68 | 63 | 62 | 96 | 32 | 85 | 170 | 866 | 81  |   | 69  | 32  |
|    |      |                      | 4  | 8  | 3  | 4  | 2  | 5  | 91  | 67  | 70  |   | 26  | 74  |
|    |      |                      |    |    |    |    |    |    |     |     | 91  |   | 49  | 04  |
| 81 | TXN  | Thioredoxin          | 9. | 8. | 9. | 10 | 9. | 9. | 1.6 | 0.7 | 1.6 | U | 0.0 | 0.6 |
| 56 | DC5  | domain containing    | 30 | 98 | 05 | .2 | 94 | 28 | 266 | 018 | 26  | p | 29  | 63  |
| 7  |      | 5 (endoplasmic       | 08 | 73 | 77 | 23 | 18 | 65 | 268 | 833 | 62  |   | 88  | 32  |
|    |      | reticulum)           | 1  | 3  | 3  | 05 | 8  | 9  | 5   | 33  | 68  |   | 68  | 74  |
|    |      |                      |    |    |    |    |    |    |     |     | 5   |   | 44  | 04  |
| 12 | COL  | Collagen, type IV,   | 4. | 5. | 4. | 7. | 6. | 6. | 3.0 | 1.6 | 3.0 | U | 0.0 | 0.6 |
| 87 | 4A5  | $\alpha$ 5           | 47 | 96 | 38 | 18 | 33 | 12 | 475 | 076 | 47  | p | 12  | 63  |
|    |      |                      | 53 | 73 | 86 | 91 | 99 | 51 | 079 | 3   | 50  |   | 01  | 32  |
|    |      |                      | 6  | 1  | 8  | 8  | 1  | 5  | 83  |     | 79  |   | 78  | 74  |
|    |      |                      |    |    |    |    |    |    |     |     | 83  |   | 55  | 04  |
| 54 | GNG  | Guanine nucleotide   | 6. | 7. | 7. | 7. | 8. | 7. | 1.8 | 0.9 | 1.8 | U | 0.0 | 0.6 |
| 33 | 2    | binding protein (G   | 23 | 00 | 26 | 68 | 38 | 16 | 789 | 099 | 78  | p | 48  | 63  |
| 1  |      | protein), $\gamma$ 2 | 01 | 98 | 68 | 45 | 66 | 54 | 456 | 233 | 94  |   | 67  | 32  |
|    |      |                      | 8  | 2  | 7  | 1  | 4  | 9  | 46  | 33  | 56  |   | 66  | 74  |
|    |      |                      |    |    |    |    |    |    |     |     | 46  |   | 59  | 04  |
| 25 | QPC  | Glutaminyl-peptide   | 3. | 3. | 3. | 5. | 5. | 4. | 3.5 | 1.8 | 3.5 | U | 0.0 | 0.6 |
| 79 | T    | cyclotransferase     | 40 | 47 | 56 | 89 | 79 | 25 | 653 | 340 | 65  | p | 03  | 63  |

|    |      |                   |    |    |    |    |    |    |     |     |     |   |     |     |
|----|------|-------------------|----|----|----|----|----|----|-----|-----|-----|---|-----|-----|
| 7  |      |                   | 21 | 53 | 64 | 39 | 38 | 83 | 984 | 633 | 39  |   | 17  | 32  |
|    |      |                   | 8  | 5  | 1  | 5  | 5  | 3  | 99  | 33  | 84  |   | 72  | 74  |
|    |      |                   |    |    |    |    |    |    |     |     | 99  |   | 08  | 04  |
| 80 | SEM  | Sema domain,      | 4. | 5. | 4. | 5. | 6. | 5. | 2.2 | 1.1 | 2.2 | U | 0.0 | 0.6 |
| 03 | A6D  | transmembrane     | 42 | 26 | 84 | 94 | 17 | 83 | 022 | 389 | 02  | p | 02  | 63  |
| 1  |      | domain (TM), and  | 06 | 57 | 94 | 18 | 59 | 50 | 323 | 666 | 23  |   | 08  | 32  |
|    |      | cytoplasmic       | 3  | 8  | 9  | 5  | 4  | 1  | 13  | 67  | 23  |   | 62  | 74  |
|    |      | domain,           |    |    |    |    |    |    |     |     | 13  |   | 26  | 04  |
|    |      | (semaphorin) 6D   |    |    |    |    |    |    |     |     |     |   |     |     |
| 64 | EPS8 | EPS8-like 2       | 10 | 9. | 9. | 8. | 8. | 9. | -1. | -0. | 1.8 | D | 0.0 | 0.6 |
| 78 | L2   |                   | .1 | 64 | 41 | 41 | 94 | 20 | 830 | 872 | 30  | o | 14  | 63  |
| 7  |      |                   | 21 | 69 | 07 | 27 | 40 | 58 | 633 | 343 | 63  | w | 82  | 32  |
|    |      |                   | 89 | 9  | 1  |    | 6  |    | 94  | 333 | 39  | n | 70  | 74  |
|    |      |                   |    |    |    |    |    |    |     |     | 4   |   | 66  | 04  |
| 70 | TLL1 | Tolloid like 1    | 3. | 3. | 3. | 5. | 6. | 3. | 2.9 | 1.5 | 2.9 | U | 0.0 | 0.6 |
| 92 |      |                   | 08 | 85 | 53 | 41 | 05 | 73 | 739 | 723 | 73  | p | 26  | 63  |
|    |      |                   | 51 | 59 | 73 | 22 | 08 | 23 | 010 | 566 | 90  |   | 24  | 32  |
|    |      |                   |    | 2  | 5  | 9  | 2  | 3  | 93  | 67  | 10  |   | 02  | 74  |
|    |      |                   |    |    |    |    |    |    |     |     | 93  |   | 7   | 04  |
| 85 | NKD  | Naked cuticle     | 3. | 4. | 3. | 4. | 4. | 4. | 1.7 | 0.8 | 1.7 | U | 0.0 | 0.6 |
| 40 | 2    | homolog 2         | 60 | 84 | 55 | 77 | 88 | 89 | 991 | 473 | 99  | p | 41  | 63  |
| 9  |      | (Drosophila)      | 96 | 86 | 65 | 77 | 76 | 13 | 473 | 133 | 14  |   | 63  | 32  |
|    |      |                   |    | 1  | 3  | 3  | 1  | 4  | 32  | 33  | 73  |   | 37  | 74  |
|    |      |                   |    |    |    |    |    |    |     |     | 32  |   | 46  | 04  |
| 53 | PLA  | Plasminogen       | 4. | 5. | 6. | 7. | 7. | 6. | 3.2 | 1.7 | 3.2 | U | 0.0 | 0.6 |
| 27 | T    | activator, tissue | 98 | 20 | 18 | 50 | 36 | 64 | 880 | 172 | 88  | p | 02  | 63  |
|    |      |                   | 32 | 28 |    | 54 | 36 | 86 | 373 | 266 | 03  |   | 34  | 32  |
|    |      |                   | 5  | 4  |    | 5  | 5  | 7  | 03  | 67  | 73  |   | 00  | 74  |
|    |      |                   |    |    |    |    |    |    |     |     | 03  |   | 12  | 04  |

|    |      |                        |    |    |    |    |    |    |     |     |     |   |     |     |
|----|------|------------------------|----|----|----|----|----|----|-----|-----|-----|---|-----|-----|
| 24 | ALO  | Arachidonate           | 4. | 4. | 4. | 5. | 6. | 5. | 1.7 | 0.8 | 1.7 | U | 0.0 | 0.6 |
| 0  | X5   | 5-lipoxygenase         | 99 | 50 | 68 | 39 | 12 | 13 | 727 | 259 | 72  | p | 21  | 63  |
|    |      |                        | 01 | 34 | 18 | 20 | 32 | 8  | 101 | 566 | 71  |   | 25  | 32  |
|    |      |                        | 3  | 5  | 3  | 1  | 7  |    | 52  | 67  | 01  |   | 20  | 74  |
|    |      |                        |    |    |    |    |    |    |     |     | 52  |   | 67  | 04  |
| 83 | DYN  | Dynein, light          | 4. | 5. | 4. | 4. | 3. | 3. | -1. | -0. | 1.9 | D | 0.0 | 0.6 |
| 65 | LRB  | chain,                 | 80 | 02 | 88 | 23 | 68 | 83 | 987 | 991 | 87  | o | 00  | 63  |
| 7  | 2    | roadblock-type 2       | 85 | 92 | 89 | 61 | 57 | 11 | 828 | 193 | 82  | w | 80  | 32  |
|    |      |                        | 2  | 2  |    | 8  | 3  | 5  | 555 | 333 | 85  | n | 65  | 74  |
|    |      |                        |    |    |    |    |    |    |     |     | 55  |   | 53  | 04  |
| 34 | IGFB | Insulin like growth    | 5. | 5. | 4. | 9. | 7. | 6. | 4.8 | 2.2 | 4.8 | U | 0.0 | 0.6 |
| 85 | P2   | factor binding         | 04 | 93 | 89 | 27 | 33 | 05 | 121 | 666 | 12  | p | 20  | 63  |
|    |      | protein 2              | 44 | 85 | 04 | 68 | 84 | 82 | 668 | 866 | 16  |   | 54  | 32  |
|    |      |                        | 5  | 3  | 7  |    | 3  | 8  | 55  | 67  | 68  |   | 12  | 74  |
|    |      |                        |    |    |    |    |    |    |     |     | 55  |   | 15  | 04  |
| 11 | HAU  | HAUS augmin like       | 5. | 5. | 6. | 6. | 6. | 6. | 1.7 | 0.7 | 1.7 | U | 0.0 | 0.6 |
| 51 | S1   | complex subunit 1      | 59 | 40 | 36 | 75 | 78 | 18 | 248 | 864 | 24  | p | 34  | 63  |
| 06 |      |                        | 75 | 28 | 74 | 50 | 45 | 78 | 728 | 9   | 87  |   | 42  | 32  |
|    |      |                        | 5  | 9  | 8  | 1  |    | 8  | 3   |     | 28  |   | 38  | 74  |
|    |      |                        |    |    |    |    |    |    |     |     | 3   |   | 43  | 04  |
| 25 | GAB  | $\Gamma$ -aminobutyric | 8. | 8. | 8. | 6. | 7. | 8. | -2. | -1. | 2.5 | D | 0.0 | 0.6 |
| 62 | RB3  | acid (GABA) A          | 99 | 69 | 52 | 47 | 41 | 19 | 595 | 375 | 95  | o | 12  | 63  |
|    |      | receptor, $\beta$ 3    | 27 | 31 | 31 | 17 | 26 | 70 | 279 | 89  | 27  | w | 66  | 32  |
|    |      |                        | 7  | 7  | 2  | 3  | 1  | 5  | 646 |     | 96  | n | 19  | 74  |
|    |      |                        |    |    |    |    |    |    |     |     | 46  |   | 39  | 04  |
| 84 | AFA  | Actin filament         | 3. | 3. | 3. | 6. | 6. | 3. | 3.5 | 1.8 | 3.5 | U | 0.0 | 0.6 |
| 63 | P1L2 | associated protein     | 24 | 85 | 82 | 38 | 12 | 93 | 747 | 378 | 74  | p | 20  | 63  |
| 2  |      | 1 like 2               | 79 | 67 | 81 | 88 | 46 | 28 | 937 | 6   | 79  |   | 68  | 32  |
|    |      |                        | 4  | 9  | 4  | 8  | 8  | 9  | 32  |     | 37  |   | 66  | 74  |

|    |      |                      |    |    |    |    |    |    |     |     |     |   |     |     |
|----|------|----------------------|----|----|----|----|----|----|-----|-----|-----|---|-----|-----|
|    |      |                      |    |    |    |    |    |    |     |     | 32  |   | 31  | 04  |
| 72 | MAG  | Melanoma antigen     | 6. | 6. | 6. | 6. | 5. | 6. | -1. | -0. | 1.5 | D | 0.0 | 0.6 |
| 82 | ED4  | family D4            | 44 | 68 | 56 | 14 | 62 | 01 | 554 | 636 | 54  | o | 11  | 63  |
| 39 |      |                      | 49 | 92 | 18 | 30 | 80 | 45 | 858 | 783 | 85  | w | 94  | 32  |
|    |      |                      | 2  | 1  | 2  | 1  | 2  | 7  | 543 | 333 | 85  | n | 28  | 74  |
|    |      |                      |    |    |    |    |    |    |     |     | 43  |   | 04  | 04  |
| 23 | SSBP | Single stranded      | 10 | 10 | 10 | 9. | 9. | 10 | -1. | -0. | 1.8 | D | 0.0 | 0.6 |
| 64 | 3    | DNA binding          | .8 | .6 | .5 | 45 | 87 | .2 | 821 | 864 | 21  | o | 06  | 63  |
| 8  |      | protein 3            | 63 | 97 | 93 | 01 | 60 | 33 | 104 | 813 | 10  | w | 08  | 32  |
|    |      |                      | 3  | 13 | 43 | 2  | 8  | 22 | 024 | 333 | 40  | n | 02  | 74  |
|    |      |                      |    |    |    |    |    |    |     |     | 24  |   | 4   | 04  |
| 23 | ZNF  | Zinc finger protein  | 9. | 8. | 8. | 7. | 8. | 8. | -1. | -0. | 1.6 | D | 0.0 | 0.6 |
| 03 | 292  | 292                  | 40 | 54 | 54 | 77 | 13 | 37 | 667 | 737 | 67  | o | 37  | 63  |
| 6  |      |                      | 83 | 44 | 64 | 16 | 62 | 77 | 700 | 86  | 70  | w | 72  | 32  |
|    |      |                      | 8  | 4  | 5  | 6  | 4  | 9  | 245 |     | 02  | n | 12  | 74  |
|    |      |                      |    |    |    |    |    |    |     |     | 45  |   | 28  | 04  |
| 69 | BTG  | B-cell translocation | 9. | 9. | 9. | 10 | 10 | 10 | 1.5 | 0.6 | 1.5 | U | 0.0 | 0.6 |
| 4  | 1    | gene 1,              | 92 | 42 | 48 | .1 | .1 | .4 | 255 | 093 | 25  | p | 17  | 63  |
|    |      | anti-proliferative   | 17 | 76 | 46 | 06 | 02 | 52 | 505 | 3   | 55  |   | 60  | 32  |
|    |      |                      | 1  | 9  | 7  | 69 | 59 | 78 | 66  |     | 05  |   | 01  | 74  |
|    |      |                      |    |    |    |    |    |    |     |     | 66  |   | 83  | 04  |
| 12 | COL  | Collagen, type IV,   | 3. | 6. | 4. | 9. | 7. | 6. | 5.3 | 2.4 | 5.3 | U | 0.0 | 0.6 |
| 82 | 4A1  | $\alpha$ 1           | 89 | 69 | 87 | 43 | 06 | 23 | 600 | 222 | 60  | p | 39  | 63  |
|    |      |                      | 77 | 45 | 41 | 22 | 16 | 92 | 507 | 466 | 05  |   | 83  | 32  |
|    |      |                      | 5  | 5  | 7  | 8  | 6  | 7  | 73  | 67  | 07  |   | 99  | 74  |
|    |      |                      |    |    |    |    |    |    |     |     | 73  |   | 3   | 04  |
| 31 | HMG  | High mobility        | 6. | 7. | 7. | 8. | 8. | 7. | 2.1 | 1.0 | 2.1 | U | 0.0 | 0.6 |
| 48 | B2   | group box 2          | 64 | 23 | 15 | 73 | 17 | 33 | 042 | 732 | 04  | p | 21  | 63  |
|    |      |                      | 74 | 32 | 13 | 47 | 94 | 77 | 216 | 866 | 22  |   | 29  | 32  |

|    |      |                       |    |    |    |    |    |    |     |     |     |   |     |     |
|----|------|-----------------------|----|----|----|----|----|----|-----|-----|-----|---|-----|-----|
|    |      |                       | 1  | 5  | 4  | 3  |    | 3  | 3   | 67  | 16  |   | 78  | 74  |
|    |      |                       |    |    |    |    |    |    |     |     | 3   |   | 15  | 04  |
| 23 | PDZ  | PDZ domain            | 4. | 4. | 4. | 7. | 5. | 5. | 2.6 | 1.3 | 2.6 | U | 0.0 | 0.6 |
| 02 | RN3  | containing ring       | 12 | 89 | 88 | 07 | 43 | 57 | 329 | 966 | 32  | p | 19  | 63  |
| 4  |      | finger 3              | 45 | 86 | 24 | 96 | 64 | 95 | 558 | 833 | 95  |   | 05  | 32  |
|    |      |                       | 8  | 3  | 3  | 9  | 7  | 3  | 56  | 33  | 58  |   | 05  | 74  |
|    |      |                       |    |    |    |    |    |    |     |     | 56  |   | 39  | 04  |
| 61 | RPL1 | Ribosomal protein     | 8. | 8. | 8. | 9. | 9. | 9. | 1.6 | 0.7 | 1.6 | U | 0.0 | 0.6 |
| 38 | 5    | L15                   | 81 | 25 | 84 | 90 | 03 | 24 | 871 | 545 | 87  | p | 30  | 63  |
|    |      |                       | 50 | 7  | 80 | 13 | 97 | 27 | 325 | 733 | 13  |   | 21  | 32  |
|    |      |                       | 7  |    | 3  | 7  | 5  |    | 61  | 33  | 25  |   | 69  | 74  |
|    |      |                       |    |    |    |    |    |    |     |     | 61  |   | 55  | 04  |
| 86 | RUN  | Runt-related          | 4. | 6. | 5. | 7. | 6. | 5. | 2.5 | 1.3 | 2.5 | U | 0.0 | 0.6 |
| 2  | X1T1 | transcription factor  | 39 | 14 | 05 | 24 | 45 | 90 | 258 | 367 | 25  | p | 32  | 63  |
|    |      | 1; translocated to, 1 | 62 | 12 | 54 | 40 | 89 | 00 | 284 | 566 | 82  |   | 57  | 32  |
|    |      | (cyclin D-related)    | 1  |    | 8  | 8  | 9  | 9  | 67  | 67  | 84  |   | 40  | 74  |
|    |      |                       |    |    |    |    |    |    |     |     | 67  |   | 05  | 04  |
| 83 | CTT  | Cortactin binding     | 8. | 7. | 8. | 6. | 6. | 7. | -1. | -0. | 1.9 | D | 0.0 | 0.6 |
| 99 | NBP  | protein 2             | 27 | 38 | 14 | 77 | 70 | 39 | 972 | 979 | 72  | o | 13  | 63  |
| 2  | 2    |                       | 75 | 75 | 23 | 02 | 73 | 08 | 046 | 693 | 04  | w | 68  | 32  |
|    |      |                       | 3  | 8  | 9  | 3  | 7  | 2  | 176 | 333 | 61  | n | 35  | 74  |
|    |      |                       |    |    |    |    |    |    |     |     | 76  |   | 27  | 04  |
| 25 | FUT  | Fucosyltransferase    | 7. | 7. | 7. | 6. | 7. | 7. | -1. | -0. | 1.5 | D | 0.0 | 0.6 |
| 28 | 6    | 6                     | 87 | 83 | 67 | 80 | 10 | 50 | 579 | 659 | 79  | o | 17  | 63  |
|    |      |                       | 89 | 49 | 86 | 22 | 32 | 79 | 761 | 706 | 76  | w | 01  | 32  |
|    |      |                       | 5  | 8  |    | 1  | 8  | 2  | 389 | 667 | 13  | n | 58  | 74  |
|    |      |                       |    |    |    |    |    |    |     |     | 89  |   | 7   | 04  |
| 24 | AKR  | Aldo-keto             | 8. | 8. | 8. | 7. | 7. | 8. | -2. | -1. | 2.0 | D | 0.0 | 0.6 |
| 61 | 7L   | reductase family      | 71 | 15 | 39 | 01 | 11 | 12 | 000 | 000 | 00  | o | 17  | 63  |

|                |                  |                                                                    |                     |                     |                     |                     |                     |                     |                          |                          |                             |                  |                             |                             |
|----------------|------------------|--------------------------------------------------------------------|---------------------|---------------------|---------------------|---------------------|---------------------|---------------------|--------------------------|--------------------------|-----------------------------|------------------|-----------------------------|-----------------------------|
| 81             |                  | 7-like<br>(gene/pseudogene)                                        | 23<br>4             | 05<br>7             | 38<br>9             | 44<br>8             | 50<br>8             | 71<br>5             | 041<br>589               | 03                       | 04<br>15<br>89              | w<br>n           | 94<br>25<br>5               | 32<br>74<br>04              |
| 16<br>26<br>81 | C18o<br>rf54     | Chromosome 18<br>open reading frame<br>54                          | 3.<br>07<br>62<br>5 | 3.<br>78<br>49<br>5 | 3.<br>20<br>20<br>4 | 4.<br>34<br>68<br>5 | 4.<br>14<br>22<br>4 | 3.<br>53<br>18<br>4 | 1.5<br>719<br>587<br>21  | 0.6<br>525<br>633<br>33  | 1.5<br>71<br>95<br>87<br>21 | U<br>p           | 0.0<br>44<br>24<br>93<br>64 | 0.6<br>63<br>32<br>74<br>04 |
| 11<br>48<br>01 | TME<br>M20<br>0A | Transmembrane<br>protein 200A                                      | 3.<br>33<br>09<br>2 | 4.<br>26<br>60<br>7 | 4.<br>17<br>46<br>3 | 5.<br>71<br>68      | 5.<br>08<br>76      | 4.<br>82<br>48      | 2.4<br>382<br>735<br>65  | 1.2<br>858<br>6          | 2.4<br>38<br>27<br>35<br>65 | U<br>p           | 0.0<br>05<br>34<br>72<br>51 | 0.6<br>63<br>32<br>74<br>04 |
| 20<br>13       | EMP<br>2         | Epithelial<br>membrane protein<br>2                                | 4.<br>40<br>52<br>5 | 4.<br>87<br>92<br>5 | 5.<br>39<br>90<br>9 | 6.<br>78<br>62<br>2 | 7.<br>18<br>59<br>1 | 4.<br>99<br>10<br>3 | 2.6<br>879<br>817<br>32  | 1.4<br>265<br>233<br>33  | 2.6<br>87<br>98<br>17<br>32 | U<br>p           | 0.0<br>40<br>85<br>13<br>86 | 0.6<br>63<br>32<br>74<br>04 |
| 11<br>12<br>6  | CD1<br>60        | CD160 molecule                                                     | 4.<br>21<br>36<br>6 | 4.<br>28<br>12<br>8 | 4.<br>51<br>81<br>4 | 3.<br>04<br>38      | 3.<br>46<br>52<br>2 | 4.<br>23<br>26<br>5 | -1.<br>690<br>132<br>868 | -0.<br>757<br>136<br>667 | 1.6<br>90<br>13<br>28<br>68 | D<br>o<br>w<br>n | 0.0<br>35<br>55<br>17<br>22 | 0.6<br>63<br>32<br>74<br>04 |
| 89<br>82<br>2  | KCN<br>K17       | Potassium channel,<br>two pore domain<br>subfamily K,<br>member 17 | 4.<br>51<br>68      | 5.<br>50<br>97<br>4 | 4.<br>82<br>42<br>5 | 5.<br>65<br>30<br>4 | 6.<br>53<br>65<br>5 | 5.<br>53<br>69<br>6 | 1.9<br>434<br>051<br>09  | 0.9<br>585<br>866<br>67  | 1.9<br>43<br>40<br>51<br>09 | U<br>p           | 0.0<br>29<br>56<br>71<br>86 | 0.6<br>63<br>32<br>74<br>04 |
| 64             | SH3              | SH3 domain                                                         | 8.                  | 8.                  | 8.                  | 9.                  | 9.                  | 9.                  | 1.6                      | 0.7                      | 1.6                         | U                | 0.0                         | 0.6                         |



|    |     |                      |    |    |    |    |    |    |     |     |     |   |     |     |
|----|-----|----------------------|----|----|----|----|----|----|-----|-----|-----|---|-----|-----|
| 51 | BGR | binding              | 55 | 10 | 92 | 66 | 06 | 09 | 768 | 457 | 76  | p | 27  | 63  |
|    | L   | glutamate-rich       | 54 | 84 | 63 | 91 | 55 | 29 | 845 | 833 | 88  |   | 37  | 32  |
|    |     | protein like         | 5  |    | 5  | 3  | 1  | 1  | 12  | 33  | 45  |   | 54  | 74  |
|    |     |                      |    |    |    |    |    |    |     |     | 12  |   | 75  | 04  |
| 70 | THB | Thrombomodulin       | 4. | 5. | 5. | 6. | 7. | 5. | 2.6 | 1.4 | 2.6 | U | 0.0 | 0.6 |
| 56 | D   |                      | 60 | 52 | 21 | 87 | 05 | 71 | 982 | 320 | 98  | p | 09  | 63  |
|    |     |                      | 32 | 95 | 79 | 38 | 53 | 77 | 923 | 466 | 29  |   | 10  | 32  |
|    |     |                      |    | 8  | 8  | 3  | 4  | 3  | 49  | 67  | 23  |   | 82  | 74  |
|    |     |                      |    |    |    |    |    |    |     |     | 49  |   | 91  | 04  |
| 97 | LZT | Leucine zipper,      | 9. | 9. | 9. | 8. | 8. | 9. | -1. | -0. | 1.5 | D | 0.0 | 0.6 |
| 62 | S3  | putative tumor       | 33 | 63 | 11 | 28 | 97 | 00 | 524 | 608 | 24  | o | 45  | 63  |
|    |     | suppressor family    | 58 | 52 | 65 | 14 | 53 | 65 | 285 | 133 | 28  | w | 68  | 32  |
|    |     | member 3             | 5  | 7  | 5  | 1  |    | 6  | 698 | 333 | 56  | n | 51  | 74  |
|    |     |                      |    |    |    |    |    |    |     |     | 98  |   | 95  | 04  |
| 27 | GNA | Guanine nucleotide   | 9. | 9. | 9. | 8. | 8. | 9. | -1. | -0. | 1.7 | D | 0.0 | 0.6 |
| 81 | Z   | binding protein (G   | 59 | 33 | 63 | 21 | 65 | 22 | 765 | 820 | 65  | o | 18  | 63  |
|    |     | protein), $\alpha$ z | 56 | 03 | 12 | 58 | 56 | 53 | 569 | 133 | 56  | w | 29  | 32  |
|    |     | polypeptide          | 9  | 8  | 4  | 8  | 7  | 6  | 158 | 333 | 91  | n | 08  | 74  |
|    |     |                      |    |    |    |    |    |    |     |     | 58  |   | 11  | 04  |
| 34 | FRE | FRAS1 related        | 4. | 4. | 4. | 3. | 3. | 4. | -1. | -0. | 1.5 | D | 0.0 | 0.6 |
| 16 | M2  | extracellular matrix | 60 | 25 | 47 | 80 | 55 | 01 | 568 | 649 | 68  | o | 06  | 63  |
| 40 |     | protein 2            | 12 | 1  | 02 | 18 | 46 | 80 | 425 | 316 | 42  | w | 06  | 32  |
|    |     |                      | 4  |    | 2  | 6  | 4  | 1  | 134 | 667 | 51  | n | 11  | 74  |
|    |     |                      |    |    |    |    |    |    |     |     | 34  |   | 54  | 04  |
| 30 | CDR | Cerebellar           | 9. | 9. | 9. | 8. | 8. | 8. | -1. | -0. | 1.5 | D | 0.0 | 0.6 |
| 85 | 2L  | degeneration-relate  | 71 | 11 | 12 | 44 | 81 | 78 | 555 | 637 | 55  | o | 23  | 63  |
| 0  |     | d protein 2-like     | 79 | 75 | 06 | 17 | 45 | 82 | 296 | 19  | 29  | w | 69  | 32  |
|    |     |                      |    | 4  | 8  | 2  | 9  | 4  | 888 |     | 68  | n | 25  | 74  |
|    |     |                      |    |    |    |    |    |    |     |     | 88  |   | 14  | 04  |

|    |      |                    |    |    |    |    |    |    |     |     |     |   |     |     |
|----|------|--------------------|----|----|----|----|----|----|-----|-----|-----|---|-----|-----|
| 13 | CPA3 | Carboxypeptidase   | 6. | 8. | 7. | 8. | 8. | 8. | 2.1 | 1.1 | 2.1 | U | 0.0 | 0.6 |
| 59 |      | A3 (mast cell)     | 92 | 08 | 19 | 94 | 14 | 44 | 622 | 125 | 62  | p | 14  | 63  |
|    |      |                    | 09 | 31 | 18 | 48 | 11 | 76 | 200 | 133 | 22  |   | 88  | 32  |
|    |      |                    | 9  | 6  | 8  | 1  | 1  | 5  | 19  | 33  | 00  |   | 17  | 74  |
|    |      |                    |    |    |    |    |    |    |     |     | 19  |   | 76  | 04  |
| 86 | PLPP | Phospholipid       | 7. | 7. | 8. | 8. | 8. | 8. | 1.6 | 0.7 | 1.6 | U | 0.0 | 0.6 |
| 13 | 3    | phosphatase 3      | 44 | 52 | 20 | 46 | 33 | 48 | 300 | 048 | 30  | p | 18  | 63  |
|    |      |                    | 08 | 46 | 44 | 68 | 74 | 02 | 053 | 766 | 00  |   | 39  | 32  |
|    |      |                    | 1  | 5  | 9  |    | 9  | 9  | 13  | 67  | 53  |   | 75  | 74  |
|    |      |                    |    |    |    |    |    |    |     |     | 13  |   | 54  | 04  |
| 84 | DNA  | Dnaj heat shock    | 8. | 8. | 8. | 7. | 7. | 8. | -1. | -0. | 1.5 | D | 0.0 | 0.6 |
| 27 | JC30 | protein family     | 74 | 43 | 27 | 73 | 83 | 02 | 534 | 617 | 34  | o | 11  | 63  |
| 7  |      | (Hsp40) member     | 51 | 03 | 40 | 50 | 94 | 12 | 678 | 936 | 67  | w | 83  | 32  |
|    |      | C30                | 2  | 5  | 5  | 6  | 1  | 4  | 723 | 667 | 87  | n | 69  | 74  |
|    |      |                    |    |    |    |    |    |    |     |     | 23  |   | 53  | 04  |
| 63 | PRD  | PR domain          | 4. | 5. | 5. | 6. | 7. | 5. | 2.7 | 1.4 | 2.7 | U | 0.0 | 0.6 |
| 9  | M1   | containing 1, with | 83 | 32 | 22 | 69 | 12 | 95 | 461 | 574 | 46  | p | 02  | 63  |
|    |      | ZNF domain         | 93 | 74 | 76 | 52 | 07 | 07 | 809 | 266 | 18  |   | 33  | 32  |
|    |      |                    | 1  | 6  | 8  | 5  | 8  |    | 06  | 67  | 09  |   | 03  | 74  |
|    |      |                    |    |    |    |    |    |    |     |     | 06  |   | 27  | 04  |
| 88 | SAP3 | Sin3A associated   | 4. | 4. | 4. | 6. | 5. | 4. | 2.0 | 1.0 | 2.0 | U | 0.0 | 0.6 |
| 19 | 0    | protein 30kda      | 72 | 53 | 64 | 42 | 81 | 85 | 895 | 632 | 89  | p | 24  | 63  |
|    |      |                    | 93 | 34 | 72 | 70 | 49 | 76 | 708 | 066 | 57  |   | 16  | 32  |
|    |      |                    | 2  | 3  | 9  | 8  |    | 8  | 36  | 67  | 08  |   | 21  | 74  |
|    |      |                    |    |    |    |    |    |    |     |     | 36  |   | 98  | 04  |
| 92 | RCS  | RCSD domain        | 5. | 5. | 5. | 6. | 6. | 6. | 1.5 | 0.6 | 1.5 | U | 0.0 | 0.6 |
| 24 | D1   | containing 1       | 25 | 90 | 99 | 70 | 39 | 02 | 762 | 564 | 76  | p | 44  | 63  |
| 1  |      |                    | 26 | 62 | 09 | 09 | 36 | 45 | 102 | 6   | 21  |   | 24  | 32  |
|    |      |                    | 4  | 1  | 3  | 9  | 3  | 4  | 63  |     | 02  |   | 24  | 74  |

|                |            |                                                    |                     |                     |                     |                     |                     |                     |                          |                             |                             |                  |                             |                             |
|----------------|------------|----------------------------------------------------|---------------------|---------------------|---------------------|---------------------|---------------------|---------------------|--------------------------|-----------------------------|-----------------------------|------------------|-----------------------------|-----------------------------|
|                |            |                                                    |                     |                     |                     |                     |                     |                     |                          |                             | 63                          |                  | 39                          | 04                          |
| 63<br>93<br>3  | MCU<br>R1  | Mitochondrial<br>calcium uniporter<br>regulator 1  | 6.<br>23<br>15<br>1 | 6.<br>64<br>10<br>4 | 6.<br>38<br>69<br>3 | 7.<br>10<br>36<br>9 | 7.<br>06<br>94<br>7 | 7.<br>23<br>11<br>2 | 1.6<br>414<br>073<br>67  | 0.7<br>149<br>333<br>33     | 1.6<br>41<br>40<br>73<br>67 | U<br>p           | 0.0<br>03<br>95<br>92<br>33 | 0.6<br>63<br>32<br>74<br>04 |
| 33<br>06       | HSP<br>A2  | Heat shock protein<br>family A (Hsp70)<br>member 2 | 4.<br>26<br>90<br>4 | 3.<br>69<br>11<br>1 | 4.<br>13<br>31<br>4 | 6.<br>19<br>67<br>1 | 5.<br>22<br>68<br>2 | 4.<br>51<br>50<br>9 | 2.4<br>313<br>821<br>52  | 1.2<br>817<br>766<br>67     | 2.4<br>31<br>38<br>21<br>52 | U<br>p           | 0.0<br>16<br>54<br>97<br>6  | 0.6<br>63<br>32<br>74<br>04 |
| 31<br>76       | HNM<br>T   | Histamine<br>N-methyltransferase                   | 8.<br>66<br>76<br>4 | 8.<br>25<br>65<br>5 | 8.<br>19<br>87<br>4 | 7.<br>38<br>53<br>1 | 7.<br>13<br>57<br>7 | 7.<br>72<br>28<br>9 | -1.<br>944<br>842<br>51  | -0.<br>959<br>653<br>333    | 1.9<br>44<br>84<br>25<br>1  | D<br>o<br>w<br>n | 0.0<br>03<br>17<br>09<br>11 | 0.6<br>63<br>32<br>74<br>04 |
| 18<br>09       | DPY<br>SL3 | Dihydropyrimidina<br>se like 3                     | 2.<br>77<br>77<br>8 | 4.<br>02<br>01<br>2 | 2.<br>84<br>14<br>7 | 7.<br>35<br>70<br>7 | 4.<br>11<br>68<br>3 | 4.<br>49<br>01<br>1 | 4.3<br>115<br>700<br>91  | 2.1<br>082<br>133<br>33     | 4.3<br>11<br>57<br>00<br>91 | U<br>p           | 0.0<br>40<br>11<br>25<br>27 | 0.6<br>63<br>32<br>74<br>04 |
| 16<br>12<br>53 | REM<br>2   | RAS (RAD and<br>GEM)-like GTP<br>binding 2         | 4.<br>48<br>13<br>4 | 4.<br>55<br>94<br>2 | 4.<br>54<br>47<br>3 | 3.<br>57<br>65<br>4 | 3.<br>78<br>19<br>9 | 4.<br>33<br>57<br>6 | -1.<br>547<br>994<br>129 | -0.<br>630<br>4<br>41<br>29 | 1.5<br>47<br>99<br>41<br>29 | D<br>o<br>w<br>n | 0.0<br>17<br>90<br>64<br>81 | 0.6<br>63<br>32<br>74<br>04 |
| 14<br>79<br>68 | CAP<br>N12 | Calpain 12                                         | 10<br>.3<br>61      | 10<br>.9<br>22      | 10<br>.4<br>79      | 8.<br>92<br>72      | 9.<br>91<br>14      | 8.<br>87<br>97      | -2.<br>546<br>183        | -1.<br>348<br>336           | 2.5<br>46<br>18             | D<br>o<br>w      | 0.0<br>03<br>56             | 0.6<br>63<br>32             |

|    |      |                              |    |    |    |    |    |    |     |     |     |   |     |     |
|----|------|------------------------------|----|----|----|----|----|----|-----|-----|-----|---|-----|-----|
|    |      |                              | 93 | 16 | 35 | 7  | 1  | 5  | 978 | 667 | 39  | n | 64  | 74  |
|    |      |                              |    |    |    |    |    |    |     |     | 78  |   | 75  | 04  |
| 51 | TRM  | Trna                         | 7. | 7. | 8. | 8. | 8. | 8. | 1.7 | 0.7 | 1.7 | U | 0.0 | 0.6 |
| 50 | T112 | methyltransferase            | 72 | 64 | 17 | 89 | 55 | 44 | 198 | 822 | 19  | p | 07  | 63  |
| 4  |      | 11-2 homolog (S. Cerevisiae) | 69 | 84 | 94 | 81 | 87 | 46 | 030 | 433 | 80  |   | 66  | 32  |
|    |      |                              | 6  | 2  | 1  | 3  | 8  | 1  | 2   | 33  | 30  |   | 54  | 74  |
|    |      |                              |    |    |    |    |    |    |     |     | 2   |   | 8   | 04  |
| 54 | ZSC  | Zinc finger and              | 5. | 5. | 4. | 4. | 4. | 4. | -1. | -0. | 1.6 | D | 0.0 | 0.6 |
| 99 | AN2  | SCAN domain                  | 13 | 11 | 98 | 06 | 48 | 60 | 617 | 693 | 17  | o | 05  | 63  |
| 3  |      | containing 2                 | 07 | 94 | 83 | 37 | 77 | 52 | 672 | 92  | 67  | w | 89  | 32  |
|    |      |                              | 3  | 6  |    | 8  | 1  | 4  | 991 |     | 29  | n | 06  | 74  |
|    |      |                              |    |    |    |    |    |    |     |     | 91  |   | 93  | 04  |
| 88 | SOC  | Suppressor of                | 3. | 4. | 5. | 6. | 6. | 5. | 3.5 | 1.8 | 3.5 | U | 0.0 | 0.6 |
| 35 | S2   | cytokine signaling           | 66 | 58 | 17 | 61 | 96 | 38 | 947 | 458 | 94  | p | 08  | 63  |
|    |      | 2                            | 36 | 67 | 54 | 62 | 16 | 56 | 297 | 833 | 72  |   | 38  | 32  |
|    |      |                              | 1  | 5  | 9  | 8  |    | 2  | 99  | 33  | 97  |   | 46  | 74  |
|    |      |                              |    |    |    |    |    |    |     |     | 99  |   | 07  | 04  |
| 55 | CCD  | Coiled-coil domain           | 6. | 6. | 5. | 5. | 5. | 5. | -1. | -0. | 1.6 | D | 0.0 | 0.6 |
| 08 | C186 | containing 186               | 61 | 53 | 78 | 30 | 89 | 53 | 659 | 730 | 59  | o | 33  | 63  |
| 8  |      |                              | 29 | 87 | 03 | 54 | 60 | 86 | 363 | 63  | 36  | w | 03  | 32  |
|    |      |                              | 3  | 2  | 6  | 7  | 1  | 4  | 549 |     | 35  | n | 85  | 74  |
|    |      |                              |    |    |    |    |    |    |     |     | 49  |   | 33  | 04  |
| 57 | PLE  | Pleckstrin                   | 6. | 5. | 5. | 6. | 6. | 6. | 1.5 | 0.6 | 1.5 | U | 0.0 | 0.6 |
| 48 | KHG  | homology and                 | 07 | 86 | 63 | 65 | 78 | 16 | 962 | 746 | 96  | p | 18  | 63  |
| 0  | 1    | rhogef domain                | 96 | 67 | 06 | 06 | 09 | 93 | 205 | 6   | 22  |   | 25  | 32  |
|    |      | containing G1                | 1  | 8  | 2  | 4  | 9  | 6  | 47  |     | 05  |   | 05  | 74  |
|    |      |                              |    |    |    |    |    |    |     |     | 47  |   | 84  | 04  |
| 91 | FCG  | Fc fragment of igg,          | 5. | 6. | 5. | 6. | 6. | 6. | 1.8 | 0.8 | 1.8 | U | 0.0 | 0.6 |
| 03 | R2C  | low affinity iic,            | 07 | 37 | 77 | 81 | 79 | 29 | 633 | 979 | 63  | p | 33  | 63  |

|                |            |                                                                                 |                     |                     |                     |                     |                     |                       |                          |                              |                             |                  |                             |                             |
|----------------|------------|---------------------------------------------------------------------------------|---------------------|---------------------|---------------------|---------------------|---------------------|-----------------------|--------------------------|------------------------------|-----------------------------|------------------|-----------------------------|-----------------------------|
|                |            | receptor for<br>(CD32)<br>(gene/pseudogene)                                     | 52<br>1             | 17<br>6             | 02<br>4             | 95<br>1             | 57<br>1             | 56<br>8               | 775<br>28                | 2                            | 37<br>75<br>28              |                  | 49<br>89<br>37              | 32<br>74<br>04              |
| 46<br>00       | MX2        | MX dynamin-like<br>gtpase 2                                                     | 7.<br>96<br>27<br>2 | 8.<br>26<br>40<br>1 | 8.<br>40<br>13<br>1 | 7.<br>21<br>57<br>1 | 7.<br>08<br>47<br>7 | 7.<br>88<br>81<br>3   | -1.<br>757<br>035<br>491 | -0.<br>813<br>143<br>333     | 1.7<br>57<br>03<br>54<br>91 | D<br>o<br>w<br>n | 0.0<br>14<br>59<br>78<br>93 | 0.6<br>63<br>32<br>74<br>04 |
| 16<br>30<br>50 | ZNF<br>564 | Zinc finger protein<br>564                                                      | 5.<br>46<br>30<br>6 | 5.<br>72<br>11<br>4 | 5.<br>51<br>10<br>7 | 4.<br>98<br>07<br>5 | 4.<br>39<br>23<br>5 | 5.<br>16<br>55<br>205 | -1.<br>645<br>934<br>667 | -0.<br>718<br>906<br>667     | 1.6<br>45<br>93<br>42<br>05 | D<br>o<br>w<br>n | 0.0<br>15<br>89<br>03<br>44 | 0.6<br>63<br>32<br>74<br>04 |
| 40<br>34       | LRC<br>H4  | Leucine-rich<br>repeats and<br>calponin homology<br>(CH) domain<br>containing 4 | 6.<br>62<br>65<br>1 | 6.<br>38<br>32<br>1 | 6.<br>17<br>94<br>6 | 5.<br>29<br>29<br>8 | 5.<br>59<br>14<br>8 | 6.<br>02<br>04<br>4   | -1.<br>695<br>166<br>129 | -0.<br>761<br>426<br>667     | 1.6<br>95<br>16<br>61<br>29 | D<br>o<br>w<br>n | 0.0<br>13<br>53<br>85<br>69 | 0.6<br>63<br>32<br>74<br>04 |
| 15<br>07<br>86 | WTH<br>3DI | RAB6C-like                                                                      | 3.<br>74<br>72<br>6 | 2.<br>92<br>60<br>1 | 3.<br>45<br>54<br>7 | 3.<br>90<br>01<br>3 | 4.<br>23<br>96<br>4 | 4.<br>29<br>00<br>3   | 1.7<br>017<br>510<br>5   | 0.7<br>670<br>2<br>5         | 1.7<br>01<br>75<br>10<br>5  | U<br>p           | 0.0<br>11<br>79<br>69<br>62 | 0.6<br>63<br>32<br>74<br>04 |
| 22<br>91<br>8  | CD9<br>3   | CD93 molecule                                                                   | 4.<br>49<br>22<br>1 | 5.<br>77<br>40<br>4 | 5.<br>28<br>25<br>9 | 7.<br>66<br>98<br>7 | 7.<br>70<br>57<br>4 | 5.<br>43<br>46<br>3   | 3.3<br>724<br>568<br>87  | 1.7<br>538<br>45<br>68<br>87 | 3.3<br>72<br>45<br>68<br>87 | U<br>p           | 0.0<br>30<br>38<br>24<br>01 | 0.6<br>63<br>32<br>74<br>04 |
| 87             | MPD        | Multiple PDZ                                                                    | 3.                  | 5.                  | 4.                  | 7.                  | 6.                  | 5.                    | 3.4                      | 1.7                          | 3.4                         | U                | 0.0                         | 0.6                         |

|    |      |                        |    |    |    |    |    |    |     |     |     |   |     |     |
|----|------|------------------------|----|----|----|----|----|----|-----|-----|-----|---|-----|-----|
| 77 | Z    | domain protein         | 78 | 46 | 69 | 17 | 37 | 72 | 238 | 756 | 23  | p | 09  | 63  |
|    |      |                        | 96 | 04 | 43 | 46 | 41 | 25 | 986 | 4   | 89  |   | 46  | 32  |
|    |      |                        | 9  | 6  | 8  | 7  | 9  | 9  | 56  |     | 86  |   | 02  | 74  |
|    |      |                        |    |    |    |    |    |    |     |     | 56  |   | 14  | 04  |
| 52 | PFN2 | Profilin 2             | 3. | 3. | 4. | 5. | 4. | 4. | 1.5 | 0.6 | 1.5 | U | 0.0 | 0.6 |
| 17 |      |                        | 66 | 79 | 22 | 07 | 11 | 45 | 693 | 501 | 69  | p | 47  | 63  |
|    |      |                        | 98 | 17 | 76 | 29 | 20 | 46 | 059 | 266 | 30  |   | 97  | 32  |
|    |      |                        | 4  | 9  | 7  | 9  | 5  | 4  | 73  | 67  | 59  |   | 39  | 74  |
|    |      |                        |    |    |    |    |    |    |     |     | 73  |   | 85  | 04  |
| 59 | RBM  | RNA binding            | 7. | 7. | 7. | 8. | 8. | 7. | 1.5 | 0.6 | 1.5 | U | 0.0 | 0.6 |
| 37 | S1   | motif, single          | 54 | 72 | 60 | 85 | 09 | 87 | 710 | 517 | 71  | p | 43  | 63  |
|    |      | stranded               | 07 | 17 | 49 | 18 | 64 | 43 | 509 | 3   | 05  |   | 50  | 32  |
|    |      | interacting protein    | 7  | 6  | 7  | 2  | 9  | 8  | 84  |     | 09  |   | 42  | 74  |
|    |      | 1                      |    |    |    |    |    |    |     |     | 84  |   | 9   | 04  |
| 56 | PCD  | Protocadherin $\alpha$ | 7. | 7. | 6. | 6. | 6. | 6. | -1. | -0. | 1.5 | D | 0.0 | 0.6 |
| 13 | HAC  | subfamily C, 1         | 44 | 73 | 91 | 53 | 83 | 80 | 557 | 639 | 57  | o | 31  | 63  |
| 5  | 1    |                        | 20 | 45 | 29 | 69 | 18 | 31 | 526 | 256 | 52  | w | 81  | 32  |
|    |      |                        | 9  | 2  | 9  |    | 2  | 1  | 454 | 667 | 64  | n | 64  | 74  |
|    |      |                        |    |    |    |    |    |    |     |     | 54  |   | 86  | 04  |
| 84 | GPT  | Glutamic pyruvate      | 9. | 8. | 9. | 7. | 8. | 8. | -1. | -0. | 1.7 | D | 0.0 | 0.6 |
| 70 | 2    | transaminase           | 03 | 66 | 28 | 61 | 50 | 44 | 756 | 812 | 56  | o | 26  | 63  |
| 6  |      | (alanine               | 66 | 82 | 83 | 14 | 2  | 15 | 515 | 716 | 51  | w | 27  | 32  |
|    |      | aminotransferase)      |    | 8  | 3  | 9  |    | 7  | 937 | 667 | 59  | n | 51  | 74  |
|    |      | 2                      |    |    |    |    |    |    |     |     | 37  |   | 54  | 04  |
| 65 | REE  | Receptor accessory     | 7. | 6. | 6. | 6. | 6. | 6. | -1. | -0. | 1.5 | D | 0.0 | 0.6 |
| 05 | P1   | protein 1              | 08 | 92 | 95 | 43 | 12 | 49 | 557 | 639 | 57  | o | 06  | 63  |
| 5  |      |                        | 96 | 87 | 25 | 10 | 60 | 63 | 414 | 153 | 41  | w | 63  | 32  |
|    |      |                        | 8  | 2  |    | 4  | 8  | 2  | 899 | 333 | 48  | n | 30  | 74  |
|    |      |                        |    |    |    |    |    |    |     |     | 99  |   | 25  | 04  |

|    |      |                      |    |    |    |    |    |    |     |     |     |   |     |     |
|----|------|----------------------|----|----|----|----|----|----|-----|-----|-----|---|-----|-----|
| 90 | MAP  | Mitogen-activated    | 6. | 7. | 6. | 6. | 6. | 6. | -1. | -0. | 1.5 | D | 0.0 | 0.6 |
| 20 | 3K14 | protein kinase       | 95 | 15 | 92 | 34 | 13 | 65 | 552 | 634 | 52  | o | 11  | 63  |
|    |      | kinase kinase 14     | 38 | 27 | 54 | 48 | 17 | 30 | 015 | 143 | 01  | w | 80  | 32  |
|    |      |                      | 7  | 3  | 4  | 6  | 1  | 4  | 895 | 333 | 58  | n | 52  | 74  |
|    |      |                      |    |    |    |    |    |    |     |     | 95  |   | 76  | 04  |
| 49 | CLE  | C-type lectin        | 6. | 6. | 6. | 4. | 5. | 5. | -2. | -1. | 2.1 | D | 0.0 | 0.6 |
| 71 | C18B | domain family 18,    | 87 | 64 | 15 | 97 | 72 | 75 | 110 | 077 | 10  | o | 07  | 63  |
| 90 |      | member B             | 89 | 41 | 82 | 01 | 35 | 50 | 439 | 543 | 43  | w | 09  | 32  |
|    |      |                      | 9  | 8  |    | 8  | 3  | 3  | 297 | 333 | 92  | n | 44  | 74  |
|    |      |                      |    |    |    |    |    |    |     |     | 97  |   | 89  | 04  |
| 10 | EFS  | Embryonal            | 3. | 5. | 4. | 6. | 5. | 5. | 2.6 | 1.3 | 2.6 | U | 0.0 | 0.6 |
| 27 |      | Fyn-associated       | 54 | 16 | 70 | 68 | 75 | 12 | 064 | 820 | 06  | p | 31  | 63  |
| 8  |      | substrate            | 90 | 25 | 23 | 08 | 10 | 83 | 689 | 966 | 46  |   | 13  | 32  |
|    |      |                      | 1  | 2  | 4  |    | 4  | 2  | 37  | 67  | 89  |   | 80  | 74  |
|    |      |                      |    |    |    |    |    |    |     |     | 37  |   | 58  | 04  |
| 97 | KIA  | KIAA0101             | 4. | 4. | 4. | 6. | 6. | 4. | 2.4 | 1.2 | 2.4 | U | 0.0 | 0.6 |
| 68 | A010 |                      | 40 | 74 | 70 | 60 | 41 | 70 | 402 | 870 | 40  | p | 31  | 63  |
|    | 1    |                      | 68 | 83 | 83 | 45 | 17 | 83 | 517 | 3   | 25  |   | 61  | 32  |
|    |      |                      | 6  | 5  | 5  | 6  | 4  | 5  | 64  |     | 17  |   | 00  | 74  |
|    |      |                      |    |    |    |    |    |    |     |     | 64  |   | 36  | 04  |
| 54 | PRR  | Proline rich 13      | 11 | 11 | 11 | 10 | 11 | 11 | -1. | -0. | 1.5 | D | 0.0 | 0.6 |
| 45 | 13   |                      | .8 | .8 | .6 | .6 | .1 | .5 | 553 | 635 | 53  | o | 34  | 63  |
| 8  |      |                      | 40 | 26 | 59 | 59 | 70 | 88 | 928 | 92  | 92  | w | 64  | 32  |
|    |      |                      | 37 | 28 | 35 | 46 | 46 | 32 | 367 |     | 83  | n | 76  | 74  |
|    |      |                      |    |    |    |    |    |    |     |     | 67  |   | 25  | 04  |
| 21 | F3   | Coagulation factor   | 5. | 4. | 4. | 5. | 5. | 5. | 1.7 | 0.8 | 1.7 | U | 0.0 | 0.6 |
| 52 |      | III (thromboplastin, | 05 | 09 | 84 | 47 | 84 | 12 | 672 | 215 | 67  | p | 28  | 63  |
|    |      | tissue factor)       | 30 | 18 | 11 | 74 | 82 | 48 | 751 | 266 | 27  |   | 94  | 32  |
|    |      |                      | 7  | 9  |    | 6  | 9  | 9  | 42  | 67  | 51  |   | 52  | 74  |

|    |     |                        |    |    |    |    |    |    |     |     |     |    |     |     |    |
|----|-----|------------------------|----|----|----|----|----|----|-----|-----|-----|----|-----|-----|----|
|    |     |                        |    |    |    |    |    |    |     |     |     | 42 |     | 49  | 04 |
| 28 | TSE | Trna splicing          | 9. | 9. | 9. | 7. | 8. | 9. | -1. | -0. | 1.7 | D  | 0.0 | 0.6 |    |
| 39 | N54 | endonuclease           | 79 | 24 | 14 | 91 | 84 | 05 | 729 | 790 | 29  | o  | 49  | 63  |    |
| 89 |     | subunit 54             | 17 | 15 | 88 | 27 | 67 | 17 | 454 | 316 | 45  | w  | 49  | 32  |    |
|    |     |                        | 6  | 2  | 6  | 2  | 4  | 3  | 03  | 667 | 40  | n  | 17  | 74  |    |
|    |     |                        |    |    |    |    |    |    |     |     | 3   |    | 58  | 04  |    |
| 83 | PLA | Phospholipase A2       | 7. | 7. | 7. | 7. | 6. | 7. | -1. | -0. | 1.5 | D  | 0.0 | 0.6 |    |
| 98 | 2G6 | group VI               | 76 | 84 | 93 | 02 | 92 | 57 | 597 | 676 | 97  | o  | 14  | 63  |    |
|    |     |                        | 57 | 80 | 58 | 26 | 24 | 62 | 799 | 086 | 79  | w  | 50  | 32  |    |
|    |     |                        | 2  | 7  | 2  | 5  | 9  | 1  | 814 | 667 | 98  | n  | 87  | 74  |    |
|    |     |                        |    |    |    |    |    |    |     |     | 14  |    | 99  | 04  |    |
| 56 | PCD | Protocadherin $\alpha$ | 7. | 7. | 6. | 6. | 6. | 6. | -1. | -0. | 1.5 | D  | 0.0 | 0.6 |    |
| 13 | HAC | subfamily C, 2         | 44 | 73 | 91 | 53 | 83 | 80 | 557 | 639 | 57  | o  | 31  | 63  |    |
| 4  | 2   |                        | 20 | 45 | 29 | 69 | 18 | 31 | 526 | 256 | 52  | w  | 81  | 32  |    |
|    |     |                        | 9  | 2  | 9  |    | 2  | 1  | 454 | 667 | 64  | n  | 64  | 74  |    |
|    |     |                        |    |    |    |    |    |    |     |     | 54  |    | 86  | 04  |    |
| 99 | ARN | Aryl hydrocarbon       | 3. | 4. | 3. | 5. | 4. | 4. | 2.0 | 1.0 | 2.0 | U  | 0.0 | 0.6 |    |
| 15 | T2  | receptor nuclear       | 39 | 62 | 64 | 57 | 70 | 38 | 025 | 018 | 02  | p  | 43  | 63  |    |
|    |     | translocator 2         | 06 | 59 | 43 | 61 | 79 | 23 | 847 | 633 | 58  |    | 77  | 32  |    |
|    |     |                        |    | 4  | 1  | 6  | 3  | 5  | 97  | 33  | 47  |    | 37  | 74  |    |
|    |     |                        |    |    |    |    |    |    |     |     | 97  |    | 49  | 04  |    |
| 54 | ERR | ERBB receptor          | 8. | 8. | 8. | 9. | 10 | 8. | 2.4 | 1.2 | 2.4 | U  | 0.0 | 0.6 |    |
| 20 | FI1 | feedback inhibitor     | 26 | 16 | 39 | 71 | .1 | 87 | 434 | 889 | 43  | p  | 04  | 63  |    |
| 6  |     | 1                      | 92 | 15 | 15 | 07 | 05 | 27 | 281 | 066 | 42  |    | 22  | 32  |    |
|    |     |                        |    |    |    | 3  | 47 | 2  | 24  | 67  | 81  |    | 60  | 74  |    |
|    |     |                        |    |    |    |    |    |    |     |     | 24  |    | 25  | 04  |    |
| 19 | EDN | Endothelin 3           | 2. | 3. | 3. | 4. | 5. | 3. | 2.0 | 1.0 | 2.0 | U  | 0.0 | 0.6 |    |
| 08 | 3   |                        | 95 | 33 | 92 | 65 | 11 | 61 | 791 | 559 | 79  | p  | 36  | 63  |    |
|    |     |                        | 71 | 09 | 48 | 69 | 23 | 17 | 300 | 8   | 13  |    | 93  | 32  |    |



|    |       |                                      |    |    |    |    |    |    |     |     |     |   |     |     |
|----|-------|--------------------------------------|----|----|----|----|----|----|-----|-----|-----|---|-----|-----|
|    |       |                                      | 9  | 4  | 6  | 1  | 2  |    | 47  |     | 00  |   | 49  | 74  |
|    |       |                                      |    |    |    |    |    |    |     |     | 47  |   | 09  | 04  |
| 10 | CDH   | Cadherin 5, type 2                   | 5. | 5. | 5. | 7. | 8. | 5. | 3.0 | 1.6 | 3.0 | U | 0.0 | 0.6 |
| 03 | 5     | (vascular endothelium)               | 19 | 92 | 89 | 90 | 00 | 94 | 619 | 144 | 61  | p | 22  | 63  |
|    |       |                                      | 97 | 18 | 23 | 79 | 00 | 93 | 484 | 5   | 94  |   | 37  | 32  |
|    |       |                                      | 8  | 8  | 1  | 2  | 7  | 3  | 62  |     | 84  |   | 12  | 74  |
|    |       |                                      |    |    |    |    |    |    |     |     | 62  |   | 05  | 04  |
| 44 | MT1   | Metallothionein 1F                   | 11 | 10 | 11 | 8. | 7. | 10 | -5. | -2. | 5.0 | D | 0.0 | 0.6 |
| 94 | F     |                                      | .2 | .8 | .1 | 58 | 63 | .1 | 051 | 336 | 51  | o | 04  | 63  |
|    |       |                                      | 95 | 74 | 71 | 87 | 67 | 06 | 691 | 766 | 69  | w | 42  | 32  |
|    |       |                                      | 8  | 7  | 53 | 7  | 4  | 22 | 949 | 667 | 19  | n | 51  | 74  |
|    |       |                                      |    |    |    |    |    |    |     |     | 49  |   | 9   | 04  |
| 47 | NF1C  | Nuclear factor I/C                   | 10 | 10 | 10 | 9. | 10 | 9. | -1. | -0. | 1.5 | D | 0.0 | 0.6 |
| 82 |       | (CCAAT-binding transcription factor) | .2 | .8 | .4 | 68 | .2 | 58 | 572 | 653 | 72  | o | 33  | 63  |
|    |       |                                      | 35 | 32 | 40 | 45 | 78 | 61 | 721 | 263 | 72  | w | 46  | 32  |
|    |       |                                      | 32 | 49 | 72 | 5  | 03 | 6  | 625 | 333 | 16  | n | 05  | 74  |
|    |       |                                      |    |    |    |    |    |    |     |     | 25  |   | 85  | 04  |
| 13 | CPE   | Carboxypeptidase                     | 4. | 5. | 6. | 7. | 7. | 6. | 2.8 | 1.5 | 2.8 | U | 0.0 | 0.6 |
| 63 | E     |                                      | 62 | 52 | 60 | 76 | 54 | 00 | 672 | 196 | 67  | p | 43  | 63  |
|    |       |                                      | 03 | 63 | 71 | 68 | 41 | 19 | 876 | 866 | 28  |   | 70  | 32  |
|    |       |                                      | 6  | 1  | 6  | 9  |    |    | 93  | 67  | 76  |   | 67  | 74  |
|    |       |                                      |    |    |    |    |    |    |     |     | 93  |   | 61  | 04  |
| 25 | Cxorf | Chromosome X                         | 6. | 5. | 6. | 4. | 5. | 5. | -1. | -0. | 1.8 | D | 0.0 | 0.6 |
| 66 | 23    | open reading frame                   | 26 | 69 | 08 | 90 | 29 | 25 | 814 | 859 | 14  | o | 04  | 63  |
| 43 | 23    |                                      | 19 | 09 | 24 | 39 | 41 | 95 | 078 | 236 | 07  | w | 42  | 32  |
|    |       |                                      | 4  | 1  | 7  | 3  | 1  | 7  | 224 | 667 | 82  | n | 41  | 74  |
|    |       |                                      |    |    |    |    |    |    |     |     | 24  |   | 86  | 04  |
| 54 | CLIC  | Chloride                             | 8. | 8. | 8. | 6. | 7. | 7. | -2. | -1. | 2.3 | D | 0.0 | 0.6 |
| 10 | 6     | intracellular                        | 31 | 00 | 67 | 24 | 76 | 25 | 363 | 240 | 63  | o | 15  | 63  |

|               |                 |                                                                                    |                      |                      |                      |                      |                      |                      |                          |                          |                             |                  |                             |                             |
|---------------|-----------------|------------------------------------------------------------------------------------|----------------------|----------------------|----------------------|----------------------|----------------------|----------------------|--------------------------|--------------------------|-----------------------------|------------------|-----------------------------|-----------------------------|
| 2             |                 | channel 6                                                                          | 44<br>1              | 02<br>3              | 28<br>9              | 92<br>8              | 51<br>8              | 05<br>2              | 322<br>751               | 816<br>667               | 32<br>27<br>51              | w<br>n           | 71<br>44<br>84              | 32<br>74<br>04              |
| 33<br>98      | ID2             | Inhibitor of DNA<br>binding 2,<br>dominant negative<br>helix-loop-helix<br>protein | 11<br>.2<br>96<br>48 | 10<br>.8<br>48<br>71 | 11<br>.2<br>22<br>95 | 10<br>.1<br>45<br>31 | 10<br>.2<br>70<br>13 | 10<br>.9<br>66<br>91 | -1.<br>582<br>197<br>832 | -0.<br>661<br>93         | 1.5<br>82<br>19<br>78<br>32 | D<br>o<br>w<br>n | 0.0<br>35<br>45<br>87<br>99 | 0.6<br>63<br>32<br>74<br>04 |
| 68<br>19      | SUL<br>T1C2     | Sulfotransferase<br>family 1C member<br>2                                          | 10<br>.3<br>20<br>71 | 9.<br>38<br>49<br>3  | 9.<br>79<br>66<br>2  | 8.<br>98<br>01<br>3  | 7.<br>91<br>59<br>3  | 9.<br>33<br>63<br>5  | -2.<br>128<br>681<br>345 | -1.<br>089<br>96         | 2.1<br>28<br>68<br>13<br>45 | D<br>o<br>w<br>n | 0.0<br>30<br>79<br>82<br>14 | 0.6<br>63<br>32<br>74<br>04 |
| 10<br>75      | CTS<br>C        | Cathepsin C                                                                        | 7.<br>31<br>26<br>3  | 7.<br>11<br>42<br>8  | 7.<br>29<br>17<br>7  | 9.<br>02<br>71<br>3  | 8.<br>23<br>08<br>4  | 8.<br>33<br>96<br>1  | 2.4<br>503<br>140<br>49  | 1.2<br>929<br>666<br>67  | 2.4<br>50<br>31<br>40<br>49 | U<br>p           | 0.0<br>00<br>96<br>09<br>18 | 0.6<br>63<br>32<br>74<br>04 |
| 65<br>75      | SLC2<br>0A2     | Solute carrier<br>family 20<br>(phosphate<br>transporter),<br>member 2             | 8.<br>44<br>08<br>4  | 8.<br>24<br>07<br>5  | 8.<br>29<br>80<br>5  | 7.<br>19<br>76<br>6  | 7.<br>55<br>18<br>1  | 8.<br>05<br>95<br>8  | -1.<br>651<br>198<br>235 | -0.<br>723<br>513<br>333 | 1.6<br>51<br>19<br>82<br>35 | D<br>o<br>w<br>n | 0.0<br>18<br>67<br>23<br>74 | 0.6<br>63<br>32<br>74<br>04 |
| 25<br>90<br>7 | TME<br>M15<br>8 | Transmembrane<br>protein 158<br>(gene/pseudogene)                                  | 4.<br>92<br>30<br>9  | 6.<br>67<br>08<br>3  | 5.<br>00<br>37<br>3  | 10<br>.4<br>09<br>29 | 7.<br>28<br>73<br>5  | 6.<br>48<br>33<br>6  | 5.7<br>655<br>170<br>73  | 2.5<br>274<br>5          | 5.7<br>65<br>51<br>70<br>73 | U<br>p           | 0.0<br>40<br>93<br>79<br>49 | 0.6<br>63<br>32<br>74<br>04 |
| 34            | CAT             | Cation channel,                                                                    | 5.                   | 4.                   | 4.                   | 3.                   | 4.                   | 4.                   | -1.                      | -0.                      | 1.5                         | D                | 0.0                         | 0.6                         |

|    |      |                     |    |    |    |    |    |    |     |     |     |   |     |     |
|----|------|---------------------|----|----|----|----|----|----|-----|-----|-----|---|-----|-----|
| 77 | SPE  | sperm associated 3  | 15 | 37 | 51 | 68 | 03 | 30 | 592 | 671 | 92  | o | 32  | 63  |
| 32 | R3   |                     | 37 | 52 | 65 | 60 | 94 | 60 | 573 | 36  | 57  | w | 87  | 32  |
|    |      |                     | 7  | 5  | 7  | 4  | 5  | 2  | 548 |     | 35  | n | 96  | 74  |
|    |      |                     |    |    |    |    |    |    |     |     | 48  |   | 25  | 04  |
| 14 | CDC  | CDC42 effector      | 4. | 5. | 5. | 6. | 6. | 5. | 1.9 | 0.9 | 1.9 | U | 0.0 | 0.6 |
| 81 | 42EP | protein (Rho gtpase | 85 | 50 | 01 | 53 | 32 | 51 | 952 | 965 | 95  | p | 14  | 63  |
| 70 | 5    | binding) 5          | 79 | 89 | 63 | 39 | 40 | 48 | 506 | 7   | 25  |   | 49  | 32  |
|    |      |                     | 1  | 7  | 3  | 6  | 9  | 7  | 58  |     | 06  |   | 36  | 74  |
|    |      |                     |    |    |    |    |    |    |     |     | 58  |   | 31  | 04  |
| 11 | AKA  | A-kinase anchoring  | 8. | 8. | 8. | 9. | 8. | 8. | 1.5 | 0.6 | 1.5 | U | 0.0 | 0.6 |
| 21 | P2   | protein 2           | 27 | 20 | 22 | 33 | 52 | 74 | 544 | 363 | 54  | p | 27  | 63  |
| 7  |      |                     | 71 | 76 | 09 | 92 | 59 | 97 | 382 | 933 | 43  |   | 04  | 32  |
|    |      |                     | 8  | 4  | 3  | 2  | 4  | 7  | 79  | 33  | 82  |   | 00  | 74  |
|    |      |                     |    |    |    |    |    |    |     |     | 79  |   | 58  | 04  |
| 15 | GIM  | Gtpase, IMAP        | 4. | 4. | 5. | 6. | 6. | 5. | 2.2 | 1.1 | 2.2 | U | 0.0 | 0.6 |
| 50 | AP8  | family member 8     | 51 | 70 | 43 | 75 | 10 | 24 | 101 | 441 | 10  | p | 28  | 63  |
| 38 |      |                     | 86 | 54 | 84 | 15 | 03 | 31 | 893 | 7   | 18  |   | 02  | 32  |
|    |      |                     | 6  | 1  | 3  | 2  | 1  | 8  | 92  |     | 93  |   | 02  | 74  |
|    |      |                     |    |    |    |    |    |    |     |     | 92  |   | 1   | 04  |
| 23 | VPS1 | Vacuolar protein    | 9. | 9. | 9. | 8. | 8. | 9. | -1. | -0. | 1.5 | D | 0.0 | 0.6 |
| 23 | 3A   | sorting 13 homolog  | 79 | 24 | 38 | 93 | 42 | 17 | 545 | 628 | 45  | o | 38  | 63  |
| 0  |      | A (S. Cerevisiae)   | 05 | 50 | 45 | 61 | 48 | 36 | 988 | 53  | 98  | w | 42  | 32  |
|    |      |                     | 7  | 8  | 5  |    | 4  | 7  | 942 |     | 89  | n | 39  | 74  |
|    |      |                     |    |    |    |    |    |    |     |     | 42  |   | 19  | 04  |
| 27 | NDO  | NADPH dependent     | 7. | 7. | 6. | 5. | 6. | 6. | -1. | -0. | 1.6 | D | 0.0 | 0.6 |
| 15 | R1   | diflavin            | 18 | 03 | 96 | 89 | 44 | 56 | 693 | 760 | 93  | o | 09  | 63  |
| 8  |      | oxidoreductase 1    | 08 | 44 | 57 | 21 | 01 | 82 | 686 | 166 | 68  | w | 45  | 32  |
|    |      |                     | 3  | 2  | 3  | 3  | 2  | 3  | 276 | 667 | 62  | n | 72  | 74  |
|    |      |                     |    |    |    |    |    |    |     |     | 76  |   | 31  | 04  |

|                      |                          |                                                      |                     |                     |                     |                     |                     |                     |                          |                          |                             |                  |                             |                             |
|----------------------|--------------------------|------------------------------------------------------|---------------------|---------------------|---------------------|---------------------|---------------------|---------------------|--------------------------|--------------------------|-----------------------------|------------------|-----------------------------|-----------------------------|
| 63<br>3              | BGN                      | Biglycan                                             | 3.<br>56<br>38<br>7 | 3.<br>64<br>31<br>4 | 3.<br>43<br>23      | 5.<br>70<br>42<br>7 | 4.<br>30<br>65<br>5 | 4.<br>01<br>56      | 2.1<br>871<br>265<br>01  | 1.1<br>290<br>366<br>67  | 2.1<br>87<br>12<br>65<br>01 | U<br>p           | 0.0<br>28<br>59<br>19<br>43 | 0.6<br>63<br>32<br>74<br>04 |
| 74<br>21             | VDR                      | Vitamin D (1,25-<br>dihydroxyvitamin<br>D3) receptor | 8.<br>28<br>95<br>7 | 8.<br>00<br>23<br>8 | 8.<br>04<br>89<br>8 | 6.<br>72<br>43<br>2 | 7.<br>10<br>69<br>3 | 8.<br>01<br>93<br>6 | -1.<br>777<br>816<br>802 | -0.<br>830<br>106<br>667 | 1.7<br>77<br>81<br>68<br>02 | D<br>o<br>w<br>n | 0.0<br>39<br>12<br>62<br>9  | 0.6<br>63<br>32<br>74<br>04 |
| 44<br>85             | MST<br>1                 | Macrophage<br>stimulating 1                          | 9.<br>83<br>82<br>9 | 8.<br>77<br>68<br>1 | 8.<br>69<br>80<br>2 | 8.<br>23<br>50<br>1 | 7.<br>66<br>34<br>8 | 8.<br>62<br>64<br>7 | -1.<br>904<br>466<br>178 | -0.<br>929<br>386<br>667 | 1.9<br>04<br>46<br>61<br>78 | D<br>o<br>w<br>n | 0.0<br>41<br>92<br>63<br>07 | 0.6<br>63<br>32<br>74<br>04 |
| 27<br>34<br>7        | STK<br>39                | Serine/threonine<br>kinase 39                        | 9.<br>06<br>15<br>1 | 8.<br>45<br>24<br>7 | 8.<br>78<br>31<br>7 | 7.<br>61<br>00<br>8 | 8.<br>43<br>51<br>5 | 8.<br>18<br>87<br>6 | -1.<br>610<br>735<br>938 | -0.<br>687<br>72<br>735  | 1.6<br>10<br>73<br>59<br>38 | D<br>o<br>w<br>n | 0.0<br>35<br>64<br>73<br>08 | 0.6<br>63<br>32<br>74<br>04 |
| 26<br>11<br>8        | WSB<br>1                 | WD repeat and<br>SOCS box<br>containing 1            | 4.<br>77<br>15<br>7 | 4.<br>83<br>51<br>4 | 4.<br>78<br>77<br>9 | 5.<br>89<br>67<br>2 | 5.<br>36<br>66<br>7 | 5.<br>07<br>78<br>5 | 1.5<br>679<br>867<br>12  | 0.6<br>489<br>133<br>33  | 1.5<br>67<br>98<br>67<br>12 | U<br>p           | 0.0<br>22<br>74<br>10<br>63 | 0.6<br>63<br>32<br>74<br>04 |
| 10<br>19<br>29<br>81 | LOC<br>1019<br>2981<br>5 | D(1B) dopamine<br>receptor-like                      | 7.<br>49<br>63<br>6 | 7.<br>64<br>48<br>5 | 7.<br>07<br>38<br>5 | 6.<br>85<br>24<br>1 | 6.<br>68<br>84<br>4 | 6.<br>88<br>76<br>7 | -1.<br>511<br>010<br>131 | -0.<br>595<br>513<br>333 | 1.5<br>11<br>01<br>01       | D<br>o<br>w<br>n | 0.0<br>18<br>43<br>06       | 0.6<br>63<br>32<br>74       |

|    |      |                         |    |    |    |    |    |    |     |     |     |   |     |     |
|----|------|-------------------------|----|----|----|----|----|----|-----|-----|-----|---|-----|-----|
| 5  |      |                         |    |    |    |    |    |    |     |     | 31  |   | 8   | 04  |
| 50 | IGK  | Immunoglobulin $\kappa$ | 9. | 10 | 10 | 10 | 13 | 12 | 4.3 | 2.1 | 4.3 | U | 0.0 | 0.6 |
| 80 |      | locus                   | 98 | .5 | .0 | .8 | .1 | .9 | 213 | 114 | 21  | p | 07  | 63  |
| 2  |      |                         | 69 | 22 | 69 | 78 | 14 | 19 | 437 | 8   | 34  |   | 52  | 32  |
|    |      |                         | 2  | 86 | 24 | 67 | 85 | 94 | 57  |     | 37  |   | 56  | 74  |
|    |      |                         |    |    |    |    |    |    |     |     | 57  |   | 87  | 04  |
| 10 | KLF  | Kruppel-like factor     | 7. | 7. | 8. | 8. | 9. | 8. | 2.3 | 1.2 | 2.3 | U | 0.0 | 0.6 |
| 36 | 2    | 2                       | 92 | 14 | 12 | 85 | 62 | 42 | 629 | 405 | 62  | p | 12  | 63  |
| 5  |      |                         | 55 | 27 | 31 | 74 | 79 | 78 | 460 | 866 | 94  |   | 79  | 32  |
|    |      |                         | 6  | 5  | 4  | 5  | 2  | 4  | 11  | 67  | 60  |   | 42  | 74  |
|    |      |                         |    |    |    |    |    |    |     |     | 11  |   | 81  | 04  |
| 10 | CDC  | CDC42 effector          | 4. | 4. | 4. | 7. | 6. | 5. | 3.2 | 1.6 | 3.2 | U | 0.0 | 0.6 |
| 60 | 42EP | protein (Rho gtpase     | 30 | 64 | 85 | 06 | 76 | 05 | 392 | 956 | 39  | p | 12  | 63  |
| 2  | 3    | binding) 3              | 76 | 44 | 3  | 33 | 97 | 91 | 803 | 733 | 28  |   | 10  | 32  |
|    |      |                         | 6  | 9  |    |    | 2  | 5  | 47  | 33  | 03  |   | 01  | 74  |
|    |      |                         |    |    |    |    |    |    |     |     | 47  |   | 95  | 04  |
| 28 | IGK  | Immunoglobulin $\kappa$ | 4. | 3. | 4. | 5. | 8. | 8. | 9.2 | 3.2 | 9.2 | U | 0.0 | 0.6 |
| 93 | V1-3 | variable 1-33           | 13 | 77 | 06 | 43 | 05 | 11 | 351 | 071 | 35  | p | 02  | 63  |
| 3  | 3    |                         | 79 | 90 | 70 | 04 | 72 | 77 | 154 | 3   | 11  |   | 29  | 32  |
|    |      |                         | 3  | 5  | 6  | 3  | 3  | 7  | 71  |     | 54  |   | 32  | 74  |
|    |      |                         |    |    |    |    |    |    |     |     | 71  |   | 51  | 04  |
| 10 | GAD  | Growth arrest and       | 8. | 7. | 8. | 6. | 7. | 7. | -1. | -0. | 1.7 | D | 0.0 | 0.6 |
| 91 | D45  | DNA damage              | 14 | 94 | 00 | 70 | 43 | 55 | 742 | 801 | 42  | o | 13  | 63  |
| 2  | G    | inducible $\gamma$      | 26 | 98 | 93 | 97 | 81 | 06 | 400 | 076 | 40  | w | 84  | 32  |
|    |      |                         | 3  |    | 8  | 2  | 8  | 8  | 975 | 667 | 09  | n | 43  | 74  |
|    |      |                         |    |    |    |    |    |    |     |     | 75  |   | 88  | 04  |
| 34 | IGFB | Insulin like growth     | 4. | 5. | 5. | 6. | 6. | 6. | 1.8 | 0.8 | 1.8 | U | 0.0 | 0.6 |
| 87 | P4   | factor binding          | 66 | 34 | 80 | 30 | 09 | 00 | 180 | 623 | 18  | p | 21  | 63  |
|    |      | protein 4               | 53 | 37 | 96 | 04 | 84 | 7  | 266 | 733 | 02  |   | 57  | 32  |

|    |      |                      |    |    |    |    |    |    |     |     |     |   |     |     |
|----|------|----------------------|----|----|----|----|----|----|-----|-----|-----|---|-----|-----|
|    |      |                      | 8  | 1  | 9  | 8  | 2  |    | 32  | 33  | 66  |   | 45  | 74  |
|    |      |                      |    |    |    |    |    |    |     |     | 32  |   | 09  | 04  |
| 77 | ZP3  | Zona pellucida       | 5. | 6. | 7. | 5. | 5. | 4. | -2. | -1. | 2.2 | D | 0.0 | 0.6 |
| 84 |      | glycoprotein 3       | 40 | 60 | 05 | 39 | 34 | 79 | 265 | 179 | 65  | o | 26  | 63  |
|    |      | (sperm receptor)     | 74 | 32 | 95 | 11 | 05 | 99 | 024 | 526 | 02  | w | 50  | 32  |
|    |      |                      | 9  | 5  | 6  | 7  | 6  | 9  | 518 | 667 | 45  | n | 29  | 74  |
|    |      |                      |    |    |    |    |    |    |     |     | 18  |   | 38  | 04  |
| 53 | PLA  | Phospholipase A2     | 3. | 3. | 4. | 6. | 5. | 4. | 3.0 | 1.6 | 3.0 | U | 0.0 | 0.6 |
| 21 | 2G4  | group IVA            | 83 | 78 | 57 | 14 | 90 | 95 | 362 | 023 | 36  | p | 02  | 63  |
|    | A    |                      | 92 | 17 | 81 | 53 | 29 | 76 | 838 | 066 | 28  |   | 86  | 32  |
|    |      |                      | 1  | 6  | 1  | 6  | 9  | 5  | 45  | 67  | 38  |   | 52  | 74  |
|    |      |                      |    |    |    |    |    |    |     |     | 45  |   | 8   | 04  |
| 52 | PGC  | Progastricsin        | 5. | 5. | 5. | 6. | 7. | 5. | 2.4 | 1.2 | 2.4 | U | 0.0 | 0.6 |
| 25 |      | (pepsinogen C)       | 23 | 19 | 10 | 30 | 65 | 40 | 275 | 795 | 27  | p | 41  | 63  |
|    |      |                      | 76 | 53 | 29 | 98 | 92 | 54 | 819 | 2   | 58  |   | 61  | 32  |
|    |      |                      | 2  | 9  | 1  | 5  |    | 3  | 52  |     | 19  |   | 06  | 74  |
|    |      |                      |    |    |    |    |    |    |     |     | 52  |   | 58  | 04  |
| 51 | IPO1 | Importin 11          | 3. | 3. | 3. | 5. | 5. | 4. | 2.6 | 1.3 | 2.6 | U | 0.0 | 0.6 |
| 19 | 1    |                      | 29 | 49 | 49 | 08 | 36 | 03 | 376 | 992 | 37  | p | 03  | 63  |
| 4  |      |                      | 25 | 99 | 52 | 58 | 68 | 28 | 991 | 8   | 69  |   | 80  | 32  |
|    |      |                      | 6  | 2  |    | 7  | 1  | 4  | 07  |     | 91  |   | 01  | 74  |
|    |      |                      |    |    |    |    |    |    |     |     | 07  |   | 24  | 04  |
| 87 | SNX  | Sorting nexin 3      | 7. | 6. | 7. | 7. | 7. | 8. | 1.7 | 0.7 | 1.7 | U | 0.0 | 0.6 |
| 24 | 3    |                      | 07 | 70 | 46 | 67 | 74 | 16 | 182 | 809 | 18  | p | 15  | 63  |
|    |      |                      | 20 | 13 | 76 | 80 | 23 | 33 | 500 | 4   | 25  |   | 36  | 32  |
|    |      |                      | 1  | 5  | 1  | 2  | 8  | 9  | 48  |     | 00  |   | 08  | 74  |
|    |      |                      |    |    |    |    |    |    |     |     | 48  |   | 83  | 04  |
| 72 | TUB  | Tubby bipartite      | 3. | 5. | 4. | 6. | 6. | 5. | 3.6 | 1.8 | 3.6 | U | 0.0 | 0.6 |
| 75 |      | transcription factor | 40 | 05 | 11 | 77 | 15 | 19 | 088 | 515 | 08  | p | 08  | 63  |

|    |      |                    |    |    |    |    |    |    |     |     |     |   |     |     |
|----|------|--------------------|----|----|----|----|----|----|-----|-----|-----|---|-----|-----|
|    |      |                    | 44 | 19 | 35 | 00 | 92 | 53 | 937 | 566 | 89  |   | 87  | 32  |
|    |      |                    | 2  | 3  | 8  | 1  |    | 9  | 44  | 67  | 37  |   | 11  | 74  |
|    |      |                    |    |    |    |    |    |    |     |     | 44  |   | 08  | 04  |
| 21 | ETV  | Ets variant 4      | 9. | 8. | 8. | 8. | 7. | 8. | -2. | -1. | 2.0 | D | 0.0 | 0.6 |
| 18 | 4    |                    | 13 | 91 | 75 | 16 | 28 | 22 | 057 | 040 | 57  | o | 07  | 63  |
|    |      |                    | 17 | 04 | 53 | 72 | 19 | 65 | 068 | 59  | 06  | w | 49  | 32  |
|    |      |                    | 8  | 6  | 5  | 8  | 7  | 7  | 734 |     | 87  | n | 21  | 74  |
|    |      |                    |    |    |    |    |    |    |     |     | 34  |   | 76  | 04  |
| 51 | ZC2  | Zinc finger,       | 5. | 5. | 5. | 6. | 6. | 5. | 1.6 | 0.7 | 1.6 | U | 0.0 | 0.6 |
| 10 | HC1  | C2HC-type          | 73 | 57 | 85 | 92 | 35 | 99 | 271 | 023 | 27  | p | 27  | 63  |
| 1  | A    | containing 1A      | 55 | 68 | 23 | 01 | 73 | 42 | 042 | 066 | 10  |   | 54  | 32  |
|    |      |                    | 8  | 1  | 7  | 1  | 5  | 2  | 25  | 67  | 42  |   | 61  | 74  |
|    |      |                    |    |    |    |    |    |    |     |     | 25  |   | 39  | 04  |
| 10 | ZBT  | Zinc finger and    | 7. | 6. | 6. | 5. | 6. | 6. | -1. | -0. | 1.7 | D | 0.0 | 0.6 |
| 01 | B42  | BTB domain         | 20 | 57 | 91 | 94 | 01 | 34 | 738 | 798 | 38  | o | 07  | 63  |
| 28 |      | containing 42      | 23 | 80 | 81 | 11 | 80 | 46 | 970 | 233 | 97  | w | 67  | 32  |
| 92 |      |                    | 5  | 6  | 2  | 5  | 3  | 5  | 349 | 333 | 03  | n | 09  | 74  |
| 7  |      |                    |    |    |    |    |    |    |     |     | 49  |   | 43  | 04  |
| 10 | GJC1 | Gap junction       | 3. | 3. | 3. | 4. | 4. | 3. | 1.6 | 0.6 | 1.6 | U | 0.0 | 0.6 |
| 05 |      | protein $\gamma$ 1 | 47 | 81 | 34 | 48 | 43 | 79 | 187 | 948 | 18  | p | 17  | 63  |
| 2  |      |                    | 46 | 71 | 56 | 46 | 80 | 93 | 198 | 533 | 71  |   | 05  | 32  |
|    |      |                    | 3  | 9  | 6  | 5  | 3  | 6  | 63  | 33  | 98  |   | 37  | 74  |
|    |      |                    |    |    |    |    |    |    |     |     | 63  |   | 63  | 04  |
| 26 | STE  | STEAP2             | 8. | 8. | 8. | 7. | 7. | 8. | -1. | -0. | 1.5 | D | 0.0 | 0.6 |
| 17 | AP2  | metalloreductase   | 54 | 06 | 61 | 53 | 53 | 18 | 581 | 661 | 81  | o | 33  | 63  |
| 29 |      |                    | 92 | 77 | 44 | 37 | 09 | 30 | 404 | 206 | 40  | w | 10  | 32  |
|    |      |                    | 1  | 3  | 5  | 6  | 3  | 8  | 754 | 667 | 47  | n | 87  | 74  |
|    |      |                    |    |    |    |    |    |    |     |     | 54  |   | 07  | 04  |
| 72 | TRO  | Trophinin          | 4. | 4. | 4. | 6. | 5. | 4. | 2.1 | 1.0 | 2.1 | U | 0.0 | 0.6 |

|    |     |                     |    |    |    |    |    |    |     |     |     |   |     |     |
|----|-----|---------------------|----|----|----|----|----|----|-----|-----|-----|---|-----|-----|
| 16 |     |                     | 05 | 90 | 14 | 35 | 45 | 56 | 254 | 877 | 25  | p | 49  | 63  |
|    |     |                     | 91 | 94 | 09 | 56 | 60 | 11 | 622 | 766 | 46  |   | 61  | 32  |
|    |     |                     | 5  | 8  | 1  | 1  | 8  | 8  | 96  | 67  | 22  |   | 97  | 74  |
|    |     |                     |    |    |    |    |    |    |     |     | 96  |   | 73  | 04  |
| 84 | FAR | Fatty acyl coa      | 5. | 4. | 4. | 6. | 5. | 5. | 1.9 | 0.9 | 1.9 | U | 0.0 | 0.6 |
| 18 | 1   | reductase 1         | 09 | 98 | 97 | 50 | 74 | 65 | 362 | 532 | 36  | p | 06  | 63  |
| 8  |     |                     | 51 | 42 | 15 | 99 | 39 | 67 | 474 | 633 | 24  |   | 16  | 32  |
|    |     |                     | 6  | 5  | 1  | 9  | 9  | 3  | 42  | 33  | 74  |   | 76  | 74  |
|    |     |                     |    |    |    |    |    |    |     |     | 42  |   | 53  | 04  |
| 10 | AKT | V-akt murine        | 4. | 5. | 4. | 5. | 5. | 5. | 1.5 | 0.6 | 1.5 | U | 0.0 | 0.6 |
| 00 | 3   | thymoma viral       | 47 | 15 | 75 | 88 | 41 | 09 | 913 | 702 | 91  | p | 38  | 63  |
| 0  |     | oncogene homolog    | 17 | 74 | 33 | 60 | 35 | 35 | 266 | 3   | 32  |   | 67  | 32  |
|    |     | 3                   |    | 2  | 4  | 2  | 8  | 5  | 43  |     | 66  |   | 23  | 74  |
|    |     |                     |    |    |    |    |    |    |     |     | 43  |   | 79  | 04  |
| 78 | BTG | BTG family          | 5. | 5. | 5. | 7. | 8. | 6. | 3.2 | 1.6 | 3.2 | U | 0.0 | 0.6 |
| 32 | 2   | member 2            | 86 | 38 | 98 | 34 | 13 | 80 | 165 | 854 | 16  | p | 01  | 63  |
|    |     |                     | 01 | 84 | 86 | 78 | 69 | 89 | 110 | 966 | 51  |   | 95  | 32  |
|    |     |                     | 5  | 4  | 5  | 6  | 7  |    | 98  | 67  | 10  |   | 02  | 74  |
|    |     |                     |    |    |    |    |    |    |     |     | 98  |   | 83  | 04  |
| 85 | CAV | Caveolin 1          | 6. | 8. | 7. | 10 | 9. | 9. | 3.8 | 1.9 | 3.8 | U | 0.0 | 0.6 |
| 7  | 1   |                     | 38 | 15 | 79 | .0 | 09 | 01 | 632 | 498 | 63  | p | 05  | 63  |
|    |     |                     | 29 | 66 | 88 | 72 | 82 | 73 | 722 | 233 | 27  |   | 95  | 32  |
|    |     |                     | 1  | 4  | 6  | 35 | 2  | 1  | 06  | 33  | 22  |   | 87  | 74  |
|    |     |                     |    |    |    |    |    |    |     |     | 06  |   | 53  | 04  |
| 28 | P2R | Purinergic receptor | 3. | 3. | 3. | 5. | 4. | 4. | 1.8 | 0.8 | 1.8 | U | 0.0 | 0.6 |
| 65 | Y8  | P2Y, G-protein      | 42 | 89 | 92 | 23 | 19 | 40 | 212 | 649 | 21  | p | 20  | 63  |
| 30 |     | coupled, 8          | 38 | 21 | 11 | 16 | 08 | 94 | 470 | 266 | 24  |   | 49  | 32  |
|    |     |                     | 8  |    |    | 5  |    | 1  | 89  | 67  | 70  |   | 26  | 74  |
|    |     |                     |    |    |    |    |    |    |     |     | 89  |   | 98  | 04  |



|    |      |                    |    |    |    |    |    |    |     |     |     |   |     |     |
|----|------|--------------------|----|----|----|----|----|----|-----|-----|-----|---|-----|-----|
| 90 | DIR  | DIRAS family,      | 3. | 5. | 3. | 6. | 5. | 5. | 3.6 | 1.8 | 3.6 | U | 0.0 | 0.6 |
| 77 | AS3  | GTP-binding        | 45 | 12 | 67 | 61 | 93 | 26 | 063 | 505 | 06  | p | 08  | 63  |
|    |      | RAS-like 3         | 78 | 82 | 32 | 15 | 03 | 91 | 847 | 533 | 38  |   | 30  | 32  |
|    |      |                    | 6  | 7  |    | 4  | 2  | 3  | 83  | 33  | 47  |   | 58  | 74  |
|    |      |                    |    |    |    |    |    |    |     |     | 83  |   | 19  | 04  |
| 29 | CXC  | Chemokine          | 6. | 6. | 6. | 7. | 9. | 6. | 2.6 | 1.4 | 2.6 | U | 0.0 | 0.6 |
| 20 | L2   | (C-X-C motif)      | 18 | 48 | 82 | 75 | 16 | 82 | 678 | 157 | 67  | p | 36  | 63  |
|    |      | ligand 2           | 92 | 96 | 32 | 77 | 82 | 32 | 915 |     | 89  |   | 90  | 32  |
|    |      |                    | 6  | 3  | 6  | 8  | 1  | 6  | 09  |     | 15  |   | 22  | 74  |
|    |      |                    |    |    |    |    |    |    |     |     | 09  |   | 47  | 04  |
| 26 | AMD  | Adenosylmethionin  | 10 | 10 | 9. | 8. | 9. | 10 | -1. | -0. | 1.9 | D | 0.0 | 0.6 |
| 2  | 1    | e decarboxylase 1  | .7 | .6 | 97 | 69 | 75 | .0 | 903 | 928 | 03  | o | 48  | 63  |
|    |      |                    | 47 | 05 | 91 | 16 | 72 | 97 | 260 | 473 | 26  | w | 35  | 32  |
|    |      |                    | 45 |    | 6  | 6  | 3  | 3  | 89  | 333 | 08  | n | 14  | 74  |
|    |      |                    |    |    |    |    |    |    |     |     | 9   |   | 93  | 04  |
| 46 | PPP1 | Protein            | 5. | 4. | 5. | 6. | 5. | 6. | 1.7 | 0.7 | 1.7 | U | 0.0 | 0.6 |
| 59 | R12  | phosphatase 1      | 49 | 64 | 53 | 51 | 53 | 00 | 355 | 953 | 35  | p | 49  | 63  |
|    | A    | regulatory subunit | 35 | 33 | 91 | 71 | 58 | 92 | 384 | 833 | 53  |   | 54  | 32  |
|    |      | 12A                | 6  | 1  | 2  | 3  | 1  |    | 57  | 33  | 84  |   | 84  | 74  |
|    |      |                    |    |    |    |    |    |    |     |     | 57  |   |     | 04  |
| 56 | CLD  | Claudin domain     | 6. | 5. | 6. | 7. | 6. | 6. | 1.6 | 0.7 | 1.6 | U | 0.0 | 0.6 |
| 65 | ND1  | containing 1       | 42 | 64 | 10 | 06 | 66 | 64 | 640 | 347 | 64  | p | 19  | 63  |
| 0  |      |                    | 24 | 62 | 23 | 74 | 11 | 65 | 552 | 033 | 05  |   | 29  | 32  |
|    |      |                    | 1  | 2  | 9  | 7  | 2  | 4  | 48  | 33  | 52  |   | 89  | 74  |
|    |      |                    |    |    |    |    |    |    |     |     | 48  |   | 86  | 04  |
| 85 | FHD  | FH2 domain         | 8. | 8. | 8. | 6. | 7. | 7. | -1. | -0. | 1.9 | D | 0.0 | 0.6 |
| 46 | C1   | containing 1       | 43 | 33 | 09 | 50 | 67 | 88 | 904 | 929 | 04  | o | 36  | 63  |
| 2  |      |                    | 01 | 15 | 10 | 64 |    | 83 | 391 | 33  | 39  | w | 31  | 32  |
|    |      |                    | 4  | 4  | 8  | 2  |    | 5  | 375 |     | 13  | n | 02  | 74  |

|                |            |                                                 |                     |                     |                     |                      |                          |                     |                         |                         |                             |             |                             |                             |
|----------------|------------|-------------------------------------------------|---------------------|---------------------|---------------------|----------------------|--------------------------|---------------------|-------------------------|-------------------------|-----------------------------|-------------|-----------------------------|-----------------------------|
|                |            |                                                 |                     |                     |                     |                      |                          |                     |                         |                         | 75                          |             |                             | 04                          |
| 11<br>64       | CKS<br>2   | CDC28 protein<br>kinase regulatory<br>subunit 2 | 5.<br>17<br>77<br>5 | 5.<br>44<br>58<br>3 | 5.<br>45<br>84<br>6 | 6.<br>60<br>81<br>6  | 6.<br>26<br>93<br>7      | 5.<br>99<br>14<br>3 | 1.9<br>039<br>206<br>25 | 0.9<br>289<br>733<br>33 | 1.9<br>03<br>92<br>06<br>25 | U<br>p      | 0.0<br>02<br>63<br>56<br>23 | 0.6<br>63<br>32<br>74<br>04 |
| 25<br>70<br>19 | FRM<br>D3  | FERM domain<br>containing 3                     | 3.<br>85<br>92<br>4 | 3.<br>91<br>56<br>2 | 3.<br>80<br>84<br>7 | 4.<br>52<br>22<br>9  | 4.<br>46<br>76<br>6<br>7 | 4.<br>85<br>15<br>7 | 1.6<br>849<br>782<br>86 | 0.7<br>527<br>3<br>86   | 1.6<br>84<br>97<br>82<br>86 | U<br>p      | 0.0<br>01<br>29<br>83<br>58 | 0.6<br>63<br>32<br>74<br>04 |
| 41<br>70       | MCL<br>1   | Myeloid cell<br>leukemia 1                      | 9.<br>69<br>08<br>2 | 8.<br>74<br>71<br>3 | 9.<br>46<br>12<br>1 | 10<br>.2<br>74<br>54 | 10<br>.2<br>26<br>04     | 9.<br>80<br>66<br>4 | 1.7<br>443<br>465<br>23 | 0.8<br>026<br>866<br>67 | 1.7<br>44<br>34<br>65<br>23 | U<br>p      | 0.0<br>22<br>68<br>16<br>81 | 0.6<br>63<br>32<br>74<br>04 |
| 91<br>3        | CD1<br>E   | CD1e molecule                                   | 3.<br>89<br>43<br>8 | 4.<br>55<br>78<br>5 | 4.<br>33<br>35      | 5.<br>66<br>96<br>1  | 5.<br>28<br>71<br>9      | 4.<br>90<br>75<br>2 | 2.0<br>366<br>480<br>14 | 1.0<br>261<br>966<br>67 | 2.0<br>36<br>64<br>80<br>14 | U<br>p      | 0.0<br>04<br>91<br>86<br>19 | 0.6<br>63<br>32<br>74<br>04 |
| 24<br>87       | FRZ<br>B   | Frizzled-related<br>protein                     | 3.<br>50<br>41<br>9 | 6.<br>78<br>58<br>3 | 5.<br>00<br>68<br>2 | 8.<br>39<br>35<br>8  | 7.<br>07<br>68           | 6.<br>85<br>53<br>2 | 5.0<br>734<br>014<br>86 | 2.3<br>429<br>533<br>33 | 5.0<br>73<br>40<br>14<br>86 | U<br>p      | 0.0<br>23<br>75<br>69<br>01 | 0.6<br>63<br>32<br>74<br>04 |
| 92<br>29<br>1  | CAP<br>N13 | Calpain 13                                      | 7.<br>54<br>86      | 7.<br>14<br>94      | 7.<br>61<br>57      | 6.<br>44<br>79       | 6.<br>39<br>24           | 7.<br>15<br>87      | -1.<br>707<br>083       | -0.<br>771<br>533       | 1.7<br>07<br>08             | D<br>o<br>w | 0.0<br>19<br>81             | 0.6<br>63<br>32             |

|    |      |                      |    |    |    |    |    |    |     |     |     |   |     |     |
|----|------|----------------------|----|----|----|----|----|----|-----|-----|-----|---|-----|-----|
|    |      |                      | 1  | 6  | 3  | 9  | 2  | 9  | 152 | 333 | 31  | n | 21  | 74  |
|    |      |                      |    |    |    |    |    |    |     |     | 52  |   | 97  | 04  |
| 12 | CNN  | Calponin 2           | 3. | 3. | 3. | 6. | 4. | 4. | 2.5 | 1.3 | 2.5 | U | 0.0 | 0.6 |
| 65 | 2    |                      | 39 | 84 | 48 | 01 | 13 | 59 | 319 | 402 | 31  | p | 21  | 63  |
|    |      |                      | 61 | 83 | 05 | 95 | 20 | 42 | 694 | 6   | 96  |   | 62  | 32  |
|    |      |                      | 2  | 3  | 4  | 5  | 2  |    | 54  |     | 94  |   | 04  | 74  |
|    |      |                      |    |    |    |    |    |    |     |     | 54  |   | 23  | 04  |
| 51 | DTL  | Denticleless E3      | 2. | 3. | 3. | 5. | 5. | 3. | 2.9 | 1.5 | 2.9 | U | 0.0 | 0.6 |
| 51 |      | ubiquitin protein    | 76 | 72 | 15 | 37 | 34 | 66 | 891 | 797 | 89  | p | 14  | 63  |
| 4  |      | ligase homolog       | 02 | 81 | 07 | 29 | 35 | 18 | 459 | 333 | 14  |   | 36  | 32  |
|    |      | (Drosophila)         |    | 7  | 7  | 3  | 8  | 3  | 35  | 33  | 59  |   | 69  | 74  |
|    |      |                      |    |    |    |    |    |    |     |     | 35  |   | 87  | 04  |
| 29 | LMC  | LIM and              | 4. | 5. | 5. | 7. | 7. | 5. | 3.5 | 1.8 | 3.5 | U | 0.0 | 0.6 |
| 99 | D1   | cysteine-rich        | 34 | 49 | 22 | 96 | 02 | 53 | 222 | 165 | 22  | p | 20  | 63  |
| 5  |      | domains 1            | 70 | 62 | 48 | 31 | 14 | 31 | 565 |     | 25  |   | 64  | 32  |
|    |      |                      | 8  | 8  | 3  | 1  | 8  |    | 64  |     | 65  |   | 05  | 74  |
|    |      |                      |    |    |    |    |    |    |     |     | 64  |   | 45  | 04  |
| 28 | GPX  | Glutathione          | 4. | 5. | 4. | 6. | 5. | 5. | 1.7 | 0.7 | 1.7 | U | 0.0 | 0.6 |
| 82 | 7    | peroxidase 7         | 76 | 31 | 73 | 33 | 40 | 45 | 348 | 947 | 34  | p | 33  | 63  |
|    |      |                      | 30 | 84 | 26 | 59 | 71 | 54 | 288 | 933 | 82  |   | 12  | 32  |
|    |      |                      | 8  | 3  | 1  |    | 6  | 4  | 42  | 33  | 88  |   | 48  | 74  |
|    |      |                      |    |    |    |    |    |    |     |     | 42  |   | 82  | 04  |
| 14 | SLC2 | Solute carrier       | 3. | 3. | 3. | 4. | 4. | 4. | 1.6 | 0.7 | 1.6 | U | 0.0 | 0.6 |
| 41 | A14  | family 2             | 68 | 95 | 68 | 76 | 75 | 01 | 696 | 395 | 69  | p | 14  | 63  |
| 95 |      | (facilitated glucose | 23 | 90 | 23 | 85 | 57 | 80 | 472 | 433 | 64  |   | 14  | 32  |
|    |      | transporter),        | 5  | 4  | 5  | 4  | 6  | 7  | 5   | 33  | 72  |   | 36  | 74  |
|    |      | member 14            |    |    |    |    |    |    |     |     | 5   |   | 69  | 04  |
| 54 | RASI | Ras interacting      | 5. | 5. | 5. | 6. | 7. | 5. | 1.9 | 0.9 | 1.9 | U | 0.0 | 0.6 |
| 92 | P1   | protein 1            | 29 | 81 | 59 | 67 | 25 | 63 | 298 | 484 | 29  | p | 49  | 63  |

|                           |                          |                                                        |                     |                     |                     |                      |                     |                     |                          |                                     |                             |                  |                                   |                             |
|---------------------------|--------------------------|--------------------------------------------------------|---------------------|---------------------|---------------------|----------------------|---------------------|---------------------|--------------------------|-------------------------------------|-----------------------------|------------------|-----------------------------------|-----------------------------|
| 2                         |                          |                                                        | 87<br>2             | 39<br>8             | 90<br>7             | 03<br>3              | 35<br>3             | 33<br>8             | 517<br>17                | 9                                   | 85<br>17<br>17              |                  | 39<br>56<br>21                    | 32<br>74<br>04              |
| 22<br>85<br>6             | CHS<br>Y1                | Chondroitin sulfate<br>synthase 1                      | 6.<br>57<br>26<br>7 | 7.<br>07<br>06<br>4 | 6.<br>70<br>67<br>1 | 8.<br>15<br>18<br>8  | 8.<br>01<br>29<br>4 | 7.<br>13<br>34<br>4 | 1.9<br>762<br>242<br>53  | 0.9<br>827<br>466<br>67             | 1.9<br>76<br>22<br>42<br>53 | U<br>p           | 0.0<br>13<br>43<br>63<br>74<br>62 | 0.6<br>63<br>32<br>74<br>04 |
| 10<br>27<br>24<br>56<br>2 | LOC<br>1027<br>2456<br>2 | Hepatocyte growth<br>factor-like protein               | 7.<br>83<br>79<br>7 | 5.<br>90<br>32<br>9 | 6.<br>13<br>64      | 4.<br>57<br>05<br>6  | 4.<br>20<br>38<br>3 | 6.<br>19<br>99<br>5 | -3.<br>104<br>670<br>15  | -1.<br>634<br>44                    | 3.1<br>04<br>67<br>01<br>5  | D<br>o<br>w<br>n | 0.0<br>44<br>13<br>69<br>92       | 0.6<br>63<br>32<br>74<br>04 |
| 37<br>91                  | KDR                      | Kinase insert<br>domain receptor                       | 5.<br>27<br>99<br>3 | 6.<br>44<br>71<br>2 | 6.<br>32<br>64<br>5 | 7.<br>47<br>06<br>1  | 7.<br>91<br>89      | 6.<br>78<br>67<br>5 | 2.5<br>923<br>370<br>98  | 1.3<br>742<br>533<br>33<br>70<br>98 | 2.5<br>92<br>33<br>70<br>98 | U<br>p           | 0.0<br>10<br>78<br>69             | 0.6<br>63<br>32<br>74<br>04 |
| 27<br>06<br>7             | STA<br>U2                | Staufen<br>double-stranded<br>RNA binding<br>protein 2 | 7.<br>75<br>16<br>8 | 7.<br>13<br>66<br>7 | 6.<br>87<br>58<br>5 | 6.<br>82<br>45<br>8  | 6.<br>64<br>01<br>1 | 6.<br>53<br>68<br>3 | -1.<br>502<br>703<br>107 | -0.<br>587<br>56                    | 1.5<br>02<br>70<br>31<br>07 | D<br>o<br>w<br>n | 0.0<br>49<br>91<br>85<br>72       | 0.6<br>63<br>32<br>74<br>04 |
| 50<br>85<br>4             | C6orf<br>48              | Chromosome 6<br>open reading frame<br>48               | 9.<br>32<br>34<br>3 | 9.<br>12<br>21<br>5 | 9.<br>37<br>73      | 10<br>.5<br>30<br>19 | 9.<br>45<br>72<br>2 | 9.<br>90<br>65<br>1 | 1.6<br>136<br>712<br>23  | 0.6<br>903<br>466<br>67             | 1.6<br>13<br>67<br>12<br>23 | U<br>p           | 0.0<br>40<br>94<br>56<br>61       | 0.6<br>63<br>32<br>74<br>04 |
| 58                        | IL22                     | Interleukin 22                                         | 7.                  | 7.                  | 8.                  | 5.                   | 6.                  | 7.                  | -2.                      | -1.                                 | 2.8                         | D                | 0.0                               | 0.6                         |

|    |      |                       |    |    |    |    |    |    |     |     |     |   |     |     |
|----|------|-----------------------|----|----|----|----|----|----|-----|-----|-----|---|-----|-----|
| 98 | RA1  | receptor, $\alpha$ 1  | 58 | 92 | 37 | 32 | 31 | 75 | 818 | 495 | 18  | o | 35  | 63  |
| 5  |      |                       | 35 | 14 | 45 | 86 | 53 | 02 | 778 | 07  | 77  | w | 43  | 32  |
|    |      |                       |    | 8  | 3  | 9  | 9  | 2  | 275 |     | 82  | n | 91  | 74  |
|    |      |                       |    |    |    |    |    |    |     |     | 75  |   | 21  | 04  |
| 28 | NTM  | N-terminal            | 7. | 7. | 7. | 6. | 6. | 6. | -1. | -0. | 1.5 | D | 0.0 | 0.6 |
| 98 | T1   | Xaa-Pro-Lys           | 37 | 26 | 29 | 28 | 86 | 88 | 550 | 633 | 50  | o | 17  | 63  |
| 9  |      | N-methyltransferase 1 | 42 | 63 | 63 | 83 | 27 | 64 | 933 | 136 | 93  | w | 19  | 32  |
|    |      |                       | 3  | 6  | 5  | 9  | 2  | 2  | 326 | 667 | 33  | n | 77  | 74  |
|    |      |                       |    |    |    |    |    |    |     |     | 26  |   | 76  | 04  |
| 23 | KCN  | Potassium channel,    | 7. | 7. | 6. | 5. | 6. | 6. | -1. | -0. | 1.9 | D | 0.0 | 0.6 |
| 41 | H3   | voltage gated eag     | 27 | 00 | 80 | 59 | 07 | 53 | 948 | 962 | 48  | o | 08  | 63  |
| 6  |      | related subfamily     | 34 | 53 | 77 | 25 | 18 | 50 | 544 | 396 | 54  | w | 85  | 32  |
|    |      | H, member 3           | 4  | 2  | 6  | 2  |    | 1  | 213 | 667 | 42  | n | 73  | 74  |
|    |      |                       |    |    |    |    |    |    |     |     | 13  |   | 17  | 04  |
| 59 | RGS  | Regulator of          | 4. | 5. | 4. | 6. | 7. | 4. | 2.9 | 1.5 | 2.9 | U | 0.0 | 0.6 |
| 96 | 1    | G-protein signaling   | 20 | 40 | 48 | 64 | 33 | 79 | 451 | 583 | 45  | p | 47  | 63  |
|    |      | 1                     | 43 | 41 | 86 | 82 | 24 | 15 | 953 | 633 | 19  |   | 37  | 32  |
|    |      |                       | 2  | 7  | 4  | 5  |    | 7  | 59  | 33  | 53  |   | 56  | 74  |
|    |      |                       |    |    |    |    |    |    |     |     | 59  |   | 74  | 04  |
| 47 | RPL1 | Ribosomal protein     | 10 | 10 | 10 | 11 | 11 | 10 | 1.6 | 0.7 | 1.6 | U | 0.0 | 0.6 |
| 36 | 0A   | 110a                  | .5 | .3 | .9 | .7 | .2 | .9 | 633 | 341 | 63  | p | 26  | 63  |
|    |      |                       | 41 | 10 | 81 | 78 | 59 | 97 | 863 | 233 | 38  |   | 42  | 32  |
|    |      |                       | 72 | 32 | 58 | 96 | 09 | 94 | 91  | 33  | 63  |   | 18  | 74  |
|    |      |                       |    |    |    |    |    |    |     |     | 91  |   | 35  | 04  |
| 51 | KLH  | Kelch like family     | 3. | 3. | 4. | 5. | 4. | 4. | 1.8 | 0.8 | 1.8 | U | 0.0 | 0.6 |
| 08 | L5   | member 5              | 52 | 81 | 20 | 18 | 58 | 32 | 007 | 485 | 00  | p | 15  | 63  |
| 8  |      |                       | 26 | 55 | 86 | 58 | 10 | 56 | 442 | 933 | 74  |   | 99  | 32  |
|    |      |                       | 8  | 3  | 4  | 7  | 8  | 8  | 95  | 33  | 42  |   | 48  | 74  |
|    |      |                       |    |    |    |    |    |    |     |     | 95  |   | 69  | 04  |

|    |      |                                    |    |    |    |    |    |    |     |     |     |   |     |     |
|----|------|------------------------------------|----|----|----|----|----|----|-----|-----|-----|---|-----|-----|
| 34 | IDH3 | Isocitrate                         | 3. | 3. | 3. | 4. | 4. | 4. | 1.6 | 0.6 | 1.6 | U | 0.0 | 0.6 |
| 19 | A    | dehydrogenase 3<br>(NAD+) $\alpha$ | 84 | 33 | 61 | 24 | 30 | 34 | 240 | 995 | 24  | p | 02  | 63  |
|    |      |                                    | 14 | 90 | 59 | 84 | 65 | 01 | 394 | 866 | 03  |   | 57  | 32  |
|    |      |                                    | 1  | 2  | 7  | 7  | 5  | 4  | 37  | 67  | 94  |   | 80  | 74  |
|    |      |                                    |    |    |    |    |    |    |     |     | 37  |   | 45  | 04  |
| 93 | SLIT | Slit guidance                      | 5. | 6. | 7. | 7. | 8. | 6. | 2.2 | 1.1 | 2.2 | U | 0.0 | 0.6 |
| 53 | 2    | ligand 2                           | 88 | 94 | 04 | 94 | 42 | 92 | 031 | 395 | 03  | p | 41  | 63  |
|    |      |                                    | 05 | 35 | 34 | 36 | 21 | 05 | 585 | 733 | 15  |   | 73  | 32  |
|    |      |                                    | 7  | 9  | 1  | 2  | 6  | 1  | 67  | 33  | 85  |   | 65  | 74  |
|    |      |                                    |    |    |    |    |    |    |     |     | 67  |   | 78  | 04  |
| 29 | MSH  | Muts homolog 6                     | 3. | 2. | 3. | 4. | 3. | 3. | 1.7 | 0.8 | 1.7 | U | 0.0 | 0.6 |
| 56 | 6    |                                    | 15 | 66 | 64 | 55 | 65 | 66 | 449 | 032 | 44  | p | 43  | 63  |
|    |      |                                    | 35 | 21 | 77 | 43 | 52 | 35 | 713 | 033 | 97  |   | 06  | 32  |
|    |      |                                    | 4  | 8  | 5  | 5  | 2  | 1  | 3   | 33  | 13  |   | 24  | 74  |
|    |      |                                    |    |    |    |    |    |    |     |     | 3   |   | 24  | 04  |
| 10 | SYN  | SYNJ2BP-COX16                      | 7. | 7. | 7. | 6. | 7. | 7. | -1. | -0. | 1.5 | D | 0.0 | 0.6 |
| 05 | J2BP | readthrough                        | 77 | 45 | 68 | 65 | 02 | 46 | 504 | 589 | 04  | o | 41  | 63  |
| 29 | -CO  |                                    | 00 | 92 | 22 | 13 | 37 | 87 | 460 | 246 | 46  | w | 26  | 32  |
| 25 | X16  |                                    | 8  |    | 3  | 4  |    | 3  | 957 | 667 | 09  | n | 49  | 74  |
| 7  |      |                                    |    |    |    |    |    |    |     |     | 57  |   | 22  | 04  |
| 22 | FOX  | Forkhead box F1                    | 5. | 7. | 5. | 8. | 7. | 7. | 3.4 | 1.7 | 3.4 | U | 0.0 | 0.6 |
| 94 | F1   |                                    | 29 | 01 | 81 | 54 | 25 | 64 | 168 | 726 | 16  | p | 09  | 63  |
|    |      |                                    | 80 | 09 | 74 | 94 | 25 | 24 | 257 | 566 | 82  |   | 38  | 32  |
|    |      |                                    | 9  | 1  | 6  | 5  | 3  | 5  | 29  | 67  | 57  |   | 31  | 74  |
|    |      |                                    |    |    |    |    |    |    |     |     | 29  |   | 53  | 04  |
| 10 | BLO  | BLOC1S5-TXND                       | 9. | 8. | 9. | 10 | 9. | 9. | 1.6 | 0.7 | 1.6 | U | 0.0 | 0.6 |
| 05 | C1S5 | C5 readthrough                     | 30 | 98 | 05 | .2 | 94 | 28 | 266 | 018 | 26  | p | 29  | 63  |
| 26 | -TX  | (NMD candidate)                    | 08 | 73 | 77 | 23 | 18 | 65 | 268 | 833 | 62  |   | 88  | 32  |
| 83 | NDC  |                                    | 1  | 3  | 3  | 05 | 8  | 9  | 5   | 33  | 68  |   | 68  | 74  |

|    |      |                     |    |    |    |    |    |    |     |     |     |   |     |     |
|----|------|---------------------|----|----|----|----|----|----|-----|-----|-----|---|-----|-----|
| 6  | 5    |                     |    |    |    |    |    |    |     |     | 5   |   | 44  | 04  |
| 90 | RPL1 | Ribosomal protein   | 10 | 10 | 10 | 11 | 11 | 11 | 1.5 | 0.6 | 1.5 | U | 0.0 | 0.6 |
| 45 | 4    | L14                 | .7 | .4 | .9 | .6 | .2 | .0 | 308 | 142 | 30  | p | 21  | 63  |
|    |      |                     | 61 | 01 | 32 | 07 | 38 | 92 | 044 | 9   | 80  |   | 88  | 32  |
|    |      |                     | 29 | 69 | 75 | 78 | 4  | 42 | 5   |     | 44  |   | 94  | 74  |
|    |      |                     |    |    |    |    |    |    |     |     | 5   |   | 54  | 04  |
| 91 | LRP5 | LDL receptor        | 6. | 5. | 6. | 5. | 5. | 5. | -1. | -0. | 1.5 | D | 0.0 | 0.6 |
| 35 | L    | related protein 5   | 27 | 97 | 21 | 39 | 80 | 47 | 513 | 597 | 13  | o | 12  | 63  |
| 5  |      | like                | 22 | 72 | 62 | 21 | 48 | 52 | 431 | 823 | 43  | w | 89  | 32  |
|    |      |                     | 2  | 6  | 4  | 4  | 7  | 4  | 453 | 333 | 14  | n | 92  | 74  |
|    |      |                     |    |    |    |    |    |    |     |     | 53  |   | 27  | 04  |
| 63 | CCL  | Chemokine (C-C      | 7. | 7. | 7. | 8. | 8. | 7. | 1.5 | 0.6 | 1.5 | U | 0.0 | 0.6 |
| 58 | 14   | motif) ligand 14    | 03 | 60 | 46 | 16 | 29 | 51 | 378 | 209 | 37  | p | 49  | 63  |
|    |      |                     | 81 | 72 | 46 | 17 | 75 | 35 | 377 | 033 | 83  |   | 95  | 32  |
|    |      |                     | 1  | 9  | 5  |    | 5  | 1  | 86  | 33  | 77  |   | 22  | 74  |
|    |      |                     |    |    |    |    |    |    |     |     | 86  |   | 04  | 04  |
| 79 | FA2  | Fatty acid          | 9. | 8. | 8. | 6. | 7. | 8. | -2. | -1. | 2.5 | D | 0.0 | 0.6 |
| 15 | H    | 2-hydroxylase       | 22 | 24 | 26 | 26 | 19 | 16 | 590 | 373 | 90  | o | 28  | 63  |
| 2  |      |                     | 86 | 46 | 68 | 24 | 73 | 07 | 421 | 186 | 42  | w | 62  | 32  |
|    |      |                     | 5  | 2  | 1  | 2  | 8  | 2  | 144 | 667 | 11  | n | 79  | 74  |
|    |      |                     |    |    |    |    |    |    |     |     | 44  |   | 96  | 04  |
| 13 | SOW  | Sosondowah          | 8. | 6. | 7. | 5. | 5. | 7. | -2. | -1. | 2.3 | D | 0.0 | 0.6 |
| 45 | AHA  | ankyrin repeat      | 13 | 94 | 65 | 67 | 96 | 34 | 378 | 250 | 78  | o | 37  | 63  |
| 48 |      | domain family       | 05 | 47 | 90 | 17 | 79 | 42 | 700 | 173 | 70  | w | 48  | 32  |
|    |      | member A            | 8  | 8  | 8  | 4  | 6  | 2  | 003 | 333 | 00  | n | 71  | 74  |
|    |      |                     |    |    |    |    |    |    |     |     | 03  |   | 75  | 04  |
| 11 | CYY  | Cysteine/tyrosine-r | 4. | 5. | 5. | 7. | 7. | 5. | 3.8 | 1.9 | 3.8 | U | 0.0 | 0.6 |
| 61 | R1   | ich 1               | 50 | 26 | 34 | 67 | 91 | 32 | 133 | 310 | 13  | p | 23  | 63  |
| 59 |      |                     | 72 | 64 | 64 | 11 | 33 | 88 | 880 | 733 | 38  |   | 35  | 32  |

|    |      |                            |    |    |    |    |    |    |     |     |     |   |     |     |
|----|------|----------------------------|----|----|----|----|----|----|-----|-----|-----|---|-----|-----|
|    |      |                            | 7  | 3  | 2  | 5  | 5  | 4  | 14  | 33  | 80  |   | 41  | 74  |
|    |      |                            |    |    |    |    |    |    |     |     | 14  |   | 45  | 04  |
| 12 | USP4 | Ubiquitin specific         | 6. | 6. | 6. | 4. | 5. | 5. | -1. | -0. | 1.9 | D | 0.0 | 0.6 |
| 47 | 3    | peptidase 43               | 48 | 20 | 27 | 75 | 79 | 59 | 914 | 936 | 14  | o | 12  | 63  |
| 39 |      |                            | 17 | 09 | 46 | 89 | 69 | 06 | 503 | 97  | 50  | w | 97  | 32  |
|    |      |                            | 2  | 9  | 6  | 6  |    |    | 105 |     | 31  | n | 37  | 74  |
|    |      |                            |    |    |    |    |    |    |     |     | 05  |   | 35  | 04  |
| 51 | UPB  | Ureidopropionase,          | 5. | 4. | 5. | 3. | 3. | 5. | -2. | -1. | 2.1 | D | 0.0 | 0.6 |
| 73 | 1    | $\beta$                    | 38 | 97 | 62 | 66 | 73 | 28 | 145 | 101 | 45  | o | 41  | 63  |
| 3  |      |                            | 07 | 60 | 19 | 15 | 31 | 07 | 172 | 093 | 17  | w | 19  | 32  |
|    |      |                            | 7  | 3  | 4  | 6  | 8  | 2  | 008 | 333 | 20  | n | 91  | 74  |
|    |      |                            |    |    |    |    |    |    |     |     | 08  |   | 37  | 04  |
| 12 | ZNF  | Zinc finger protein        | 5. | 4. | 5. | 4. | 4. | 4. | -1. | -0. | 1.7 | D | 0.0 | 0.6 |
| 58 | 816  | 816                        | 87 | 84 | 61 | 39 | 70 | 87 | 724 | 785 | 24  | o | 28  | 63  |
| 93 |      |                            | 04 | 62 | 00 | 64 | 05 | 25 | 004 | 763 | 00  | w | 34  | 32  |
|    |      |                            | 7  | 6  | 7  | 1  | 3  | 7  | 253 | 333 | 42  | n | 33  | 74  |
|    |      |                            |    |    |    |    |    |    |     |     | 53  |   | 83  | 04  |
| 92 | LRR  | Leucine rich repeat        | 5. | 5. | 5. | 6. | 6. | 5. | 1.6 | 0.7 | 1.6 | U | 0.0 | 0.6 |
| 08 | FIP1 | (in FLII)                  | 59 | 75 | 82 | 90 | 60 | 79 | 383 | 122 | 38  | p | 44  | 63  |
|    |      | interacting protein        | 09 | 73 | 37 | 64 | 98 | 23 | 156 | 133 | 31  |   | 68  | 32  |
|    |      | 1                          | 8  | 4  | 1  | 4  | 9  | 4  | 38  | 33  | 56  |   | 91  | 74  |
|    |      |                            |    |    |    |    |    |    |     |     | 38  |   | 56  | 04  |
| 12 | GGT  | $\Gamma$ -glutamyltransfer | 7. | 7. | 7. | 6. | 6. | 6. | -1. | -0. | 1.8 | D | 0.0 | 0.6 |
| 49 | 6    | ase 6                      | 39 | 73 | 32 | 41 | 64 | 63 | 893 | 921 | 93  | o | 01  | 63  |
| 75 |      |                            | 05 | 64 | 99 | 73 | 19 | 36 | 807 | 29  | 80  | w | 25  | 32  |
|    |      |                            | 1  | 1  | 8  | 7  | 8  | 8  | 904 |     | 79  | n | 16  | 74  |
|    |      |                            |    |    |    |    |    |    |     |     | 04  |   | 2   | 04  |
| 19 | EEF1 | Eukaryotic                 | 10 | 10 | 10 | 11 | 11 | 10 | 1.5 | 0.6 | 1.5 | U | 0.0 | 0.6 |
| 33 | B2   | translation                | .7 | .2 | .8 | .6 | .2 | .8 | 351 | 183 | 35  | p | 49  | 63  |



|               |            |                                                                                                                                                    |                     |                     |                     |                      |                      |                     |                         |                             |                             |        |                             |                             |
|---------------|------------|----------------------------------------------------------------------------------------------------------------------------------------------------|---------------------|---------------------|---------------------|----------------------|----------------------|---------------------|-------------------------|-----------------------------|-----------------------------|--------|-----------------------------|-----------------------------|
|               |            | elongation factor 1<br>β 2                                                                                                                         | 67<br>95            | 81<br>51            | 14<br>62            | 56<br>66             | 59<br>99             | 02<br>58            | 539<br>42               | 833<br>33                   | 15<br>39<br>42              |        | 25<br>97<br>02              | 32<br>74<br>04              |
| 26<br>18      | GAR<br>T   | Phosphoribosylgly<br>cinamide<br>formyltransferase,<br>phosphoribosylglyc<br>inamide synthetase,<br>phosphoribosylami<br>noimidazole<br>synthetase | 3.<br>98<br>50<br>3 | 3.<br>34<br>30<br>9 | 4.<br>04<br>26<br>7 | 4.<br>68<br>73<br>6  | 4.<br>35<br>85<br>2  | 4.<br>50<br>32<br>7 | 1.6<br>541<br>843<br>22 | 0.7<br>261<br>2<br>43       | 1.6<br>54<br>18<br>43<br>22 | U<br>p | 0.0<br>11<br>58<br>77<br>13 | 0.6<br>63<br>32<br>74<br>04 |
| 85<br>19      | IFIT<br>M1 | Interferon induced<br>transmembrane<br>protein 1                                                                                                   | 8.<br>37<br>15<br>5 | 8.<br>93<br>58<br>1 | 9.<br>89<br>57<br>8 | 11<br>.0<br>42<br>33 | 10<br>.9<br>00<br>55 | 9.<br>49<br>31<br>3 | 2.6<br>591<br>343<br>44 | 1.4<br>109<br>566<br>67     | 2.6<br>59<br>13<br>43<br>44 | U<br>p | 0.0<br>29<br>88<br>69<br>61 | 0.6<br>63<br>32<br>74<br>04 |
| 55<br>38      | PPT1       | Palmitoyl-protein<br>thioesterase 1                                                                                                                | 5.<br>06<br>21      | 4.<br>70<br>46<br>7 | 5.<br>60<br>86<br>7 | 6.<br>30<br>2<br>4   | 5.<br>86<br>87<br>4  | 5.<br>98<br>48<br>9 | 1.9<br>009<br>624<br>05 | 0.9<br>267<br>3<br>24<br>05 | 1.9<br>00<br>96<br>24<br>05 | U<br>p | 0.0<br>09<br>05<br>27<br>54 | 0.6<br>63<br>32<br>74<br>04 |
| 50<br>86<br>1 | STM<br>N3  | Stathmin 3                                                                                                                                         | 4.<br>29<br>83<br>7 | 5.<br>05<br>08      | 5.<br>59<br>37      | 6.<br>93<br>82<br>7  | 6.<br>56<br>06<br>3  | 5.<br>16<br>61<br>3 | 2.3<br>631<br>480<br>23 | 1.2<br>407<br>1<br>80<br>23 | 2.3<br>63<br>14<br>80<br>23 | U<br>p | 0.0<br>46<br>54<br>51<br>38 | 0.6<br>63<br>32<br>74<br>04 |
| 46<br>38      | MYL<br>K   | Myosin light chain<br>kinase                                                                                                                       | 4.<br>89<br>87      | 8.<br>35<br>27      | 6.<br>39<br>61      | 10<br>.7<br>93       | 7.<br>94<br>37       | 9.<br>05<br>11      | 6.5<br>598<br>523       | 2.7<br>136<br>633           | 6.5<br>59<br>85             | U<br>p | 0.0<br>28<br>91             | 0.6<br>63<br>32             |

|    |      |                     |    |    |    |    |    |    |     |     |     |   |     |     |
|----|------|---------------------|----|----|----|----|----|----|-----|-----|-----|---|-----|-----|
|    |      |                     | 6  | 8  | 3  | 77 | 1  | 8  | 07  | 33  | 23  |   | 70  | 74  |
|    |      |                     |    |    |    |    |    |    |     |     | 07  |   | 3   | 04  |
| 10 | FAM  | Family with         | 8. | 8. | 8. | 6. | 6. | 8. | -1. | -0. | 1.8 | D | 0.0 | 0.6 |
| 01 | 47E  | sequence similarity | 41 | 11 | 00 | 87 | 92 | 15 | 814 | 859 | 14  | o | 46  | 63  |
| 29 |      | 47 member E         | 14 | 05 | 54 | 12 | 50 | 33 | 115 | 266 | 11  | w | 82  | 32  |
| 58 |      |                     |    | 9  | 6  | 9  | 6  |    | 947 | 667 | 59  | n | 13  | 74  |
| 3  |      |                     |    |    |    |    |    |    |     |     | 47  |   | 21  | 04  |
| 57 | PTP  | Protein tyrosine    | 4. | 4. | 4. | 5. | 4. | 5. | 1.5 | 0.6 | 1.5 | U | 0.0 | 0.6 |
| 88 | RC   | phosphatase,        | 33 | 78 | 78 | 65 | 82 | 24 | 247 | 085 | 24  | p | 44  | 63  |
|    |      | receptor type, C    | 11 | 29 | 29 | 25 | 12 | 90 | 753 | 966 | 77  |   | 22  | 32  |
|    |      |                     | 6  | 7  | 7  | 9  | 6  | 4  | 13  | 67  | 53  |   | 96  | 74  |
|    |      |                     |    |    |    |    |    |    |     |     | 13  |   | 35  | 04  |
| 19 | ACS  | Acyl-coa            | 7. | 7. | 7. | 6. | 7. | 6. | -1. | -0. | 1.6 | D | 0.0 | 0.6 |
| 73 | F3   | synthetase family   | 87 | 95 | 63 | 98 | 45 | 81 | 667 | 737 | 67  | o | 10  | 63  |
| 22 |      | member 3            | 30 | 76 | 52 | 88 | 37 | 12 | 133 | 37  | 13  | w | 43  | 32  |
|    |      |                     | 9  | 1  | 1  |    | 2  | 8  | 92  |     | 39  | n | 35  | 74  |
|    |      |                     |    |    |    |    |    |    |     |     | 2   |   | 1   | 04  |
| 72 | LOC  | Uncharacterized     | 5. | 6. | 6. | 8. | 7. | 6. | 2.2 | 1.1 | 2.2 | U | 0.0 | 0.6 |
| 83 | 7283 | LOC728392           | 82 | 95 | 00 | 25 | 53 | 54 | 734 | 848 | 73  | p | 42  | 63  |
| 92 | 92   |                     | 80 | 39 | 84 | 70 | 92 | 87 | 395 | 766 | 43  |   | 29  | 32  |
|    |      |                     | 3  | 5  | 4  | 5  | 2  | 8  | 86  | 67  | 95  |   | 67  | 74  |
|    |      |                     |    |    |    |    |    |    |     |     | 86  |   | 31  | 04  |
| 84 | SPIR | Spire-type actin    | 7. | 7. | 7. | 6. | 6. | 6. | -1. | -0. | 1.5 | D | 0.0 | 0.6 |
| 50 | E2   | nucleation factor 2 | 79 | 41 | 16 | 62 | 91 | 86 | 578 | 658 | 78  | o | 15  | 63  |
| 1  |      |                     | 39 | 42 | 52 | 08 | 44 | 19 | 736 | 77  | 73  | w | 43  | 32  |
|    |      |                     | 7  | 6  | 6  |    | 6  | 2  | 065 |     | 60  | n | 50  | 74  |
|    |      |                     |    |    |    |    |    |    |     |     | 65  |   | 15  | 04  |
| 89 | AP1S | Adaptor-related     | 6. | 7. | 7. | 8. | 8. | 7. | 2.4 | 1.2 | 2.4 | U | 0.0 | 0.6 |
| 05 | 2    | protein complex 1   | 11 | 01 | 06 | 23 | 49 | 34 | 482 | 917 | 48  | p | 111 | 63  |

|                |            |                                                |                     |                      |                     |                      |                      |                      |                         |                         |                             |        |                             |                             |
|----------------|------------|------------------------------------------------|---------------------|----------------------|---------------------|----------------------|----------------------|----------------------|-------------------------|-------------------------|-----------------------------|--------|-----------------------------|-----------------------------|
|                |            | Σ 2 subunit                                    | 70<br>8             | 96<br>6              | 18<br>5             | 10<br>8              | 91<br>6              | 35<br>3              | 089<br>03               | 266<br>67               | 20<br>89<br>03              |        | 26<br>39                    | 32<br>74<br>04              |
| 88<br>28       | NRP<br>2   | Neuropilin 2                                   | 5.<br>76<br>15      | 6.<br>68<br>20<br>5  | 5.<br>97<br>77<br>7 | 7.<br>70<br>72<br>8  | 6.<br>90<br>69<br>3  | 6.<br>78<br>34<br>4  | 1.9<br>890<br>919<br>92 | 0.9<br>921<br>1         | 1.9<br>89<br>09<br>19<br>92 | U<br>p | 0.0<br>20<br>62<br>00<br>03 | 0.6<br>63<br>32<br>74<br>04 |
| 39<br>56       | LGA<br>LS1 | Lectin,<br>galactoside-binding<br>, soluble, 1 | 8.<br>19<br>40<br>5 | 10<br>.2<br>34<br>36 | 9.<br>35<br>64<br>6 | 11<br>.7<br>09<br>43 | 10<br>.6<br>67<br>54 | 10<br>.3<br>37<br>99 | 3.1<br>239<br>326<br>13 | 1.6<br>433<br>633<br>33 | 3.1<br>23<br>93<br>26<br>13 | U<br>p | 0.0<br>21<br>87<br>45<br>62 | 0.6<br>63<br>32<br>74<br>04 |
| 36<br>88       | ITGB<br>1  | Integrin β 1                                   | 8.<br>40<br>28<br>6 | 8.<br>04<br>33<br>3  | 8.<br>83<br>69<br>6 | 9.<br>81<br>46<br>4  | 9.<br>33<br>68<br>1  | 9.<br>20<br>85<br>5  | 2.0<br>358<br>293<br>95 | 1.0<br>256<br>166<br>67 | 2.0<br>35<br>82<br>93<br>95 | U<br>p | 0.0<br>05<br>53<br>88<br>6  | 0.6<br>63<br>32<br>74<br>04 |
| 12<br>68       | CNR<br>1   | Cannabinoid<br>receptor 1 (brain)              | 5.<br>07<br>94<br>2 | 4.<br>04<br>26<br>7  | 4.<br>64<br>48<br>9 | 5.<br>44<br>99<br>4  | 5.<br>91<br>47<br>3  | 5.<br>09<br>8<br>3   | 1.8<br>642<br>086<br>39 | 0.8<br>985<br>633<br>33 | 1.8<br>64<br>20<br>86<br>39 | U<br>p | 0.0<br>24<br>91<br>77<br>59 | 0.6<br>63<br>32<br>74<br>04 |
| 28<br>46<br>54 | RSP<br>O1  | R-spondin 1                                    | 3.<br>90<br>32      | 4.<br>63<br>51<br>7  | 3.<br>92<br>28<br>5 | 5.<br>53<br>47<br>2  | 4.<br>73<br>30<br>5  | 4.<br>49<br>17<br>3  | 1.7<br>006<br>583<br>39 | 0.7<br>660<br>933<br>33 | 1.7<br>00<br>65<br>83<br>39 | U<br>p | 0.0<br>48<br>99<br>59<br>64 | 0.6<br>63<br>32<br>74<br>04 |
| 23             | ACO        | Acyl-coa                                       | 4.                  | 5.                   | 4.                  | 5.                   | 5.                   | 5.                   | 1.6                     | 0.6                     | 1.6                         | U      | 0.0                         | 0.6                         |

|    |     |                           |    |    |    |    |    |    |     |     |     |   |     |     |
|----|-----|---------------------------|----|----|----|----|----|----|-----|-----|-----|---|-----|-----|
| 59 | T9  | thioesterase 9            | 46 | 10 | 84 | 81 | 09 | 60 | 210 | 968 | 21  | p | 26  | 63  |
| 7  |     |                           | 79 | 10 | 99 | 26 | 49 | 19 | 141 | 966 | 01  |   | 68  | 32  |
|    |     |                           | 1  | 2  | 3  | 7  | 3  | 5  | 3   | 67  | 41  |   | 24  | 74  |
|    |     |                           |    |    |    |    |    |    |     |     | 3   |   | 55  | 04  |
| 35 | IGH | Immunoglobulin            | 6. | 7. | 6. | 7. | 10 | 8. | 3.5 | 1.8 | 3.5 | U | 0.0 | 0.6 |
| 00 | G1  | heavy constant $\gamma$ 1 | 96 | 48 | 70 | 76 | .3 | 63 | 999 | 479 | 99  | p | 18  | 63  |
|    |     | (G1m marker)              | 97 | 78 | 47 | 40 | 05 | 67 | 910 | 933 | 99  |   | 41  | 32  |
|    |     |                           | 1  | 7  | 9  | 2  | 54 | 9  | 84  | 33  | 10  |   | 96  | 74  |
|    |     |                           |    |    |    |    |    |    |     |     | 84  |   | 03  | 04  |
| 26 | GAT | GATA binding              | 5. | 6. | 5. | 7. | 6. | 6. | 1.9 | 0.9 | 1.9 | U | 0.0 | 0.6 |
| 24 | A2  | protein 2                 | 70 | 84 | 40 | 45 | 64 | 80 | 700 | 782 | 70  | p | 45  | 63  |
|    |     |                           | 98 | 17 | 91 | 01 | 26 | 27 | 879 | 6   | 08  |   | 63  | 32  |
|    |     |                           | 3  | 9  | 3  | 6  | 6  | 1  |     |     | 79  |   | 13  | 74  |
|    |     |                           |    |    |    |    |    |    |     |     |     |   | 3   | 04  |
| 84 | CMA | Cytidine                  | 3. | 3. | 3. | 6. | 5. | 3. | 3.6 | 1.8 | 3.6 | U | 0.0 | 0.6 |
| 18 | HP  | monophospho-N-a           | 32 | 41 | 63 | 48 | 55 | 94 | 515 | 685 | 51  | p | 14  | 63  |
|    |     | cetylneuraminic           | 04 | 57 | 84 | 64 | 07 | 30 | 610 | 133 | 56  |   | 26  | 32  |
|    |     | acid hydroxylase,         | 6  | 7  | 1  | 1  | 6  | 1  | 05  | 33  | 10  |   | 05  | 74  |
|    |     | pseudogene                |    |    |    |    |    |    |     |     | 05  |   | 89  | 04  |
| 34 | TUB | Tubulin, $\beta$ 2B class | 5. | 6. | 5. | 7. | 7. | 6. | 2.6 | 1.3 | 2.6 | U | 0.0 | 0.6 |
| 77 | B2B | iib                       | 45 | 81 | 52 | 65 | 58 | 72 | 160 | 873 | 16  | p | 13  | 63  |
| 33 |     |                           | 80 | 72 | 93 | 81 | 09 | 77 | 497 | 9   | 04  |   | 85  | 32  |
|    |     |                           | 2  | 6  | 5  | 3  |    | 7  | 91  |     | 97  |   | 90  | 74  |
|    |     |                           |    |    |    |    |    |    |     |     | 91  |   | 96  | 04  |
| 96 | CD5 | CD59 molecule,            | 4. | 5. | 5. | 6. | 5. | 5. | 1.8 | 0.8 | 1.8 | U | 0.0 | 0.6 |
| 6  | 9   | complement                | 73 | 41 | 09 | 28 | 93 | 68 | 504 | 878 | 50  | p | 07  | 63  |
|    |     | regulatory protein        | 60 | 08 | 62 | 10 | 93 | 65 | 763 | 966 | 47  |   | 37  | 32  |
|    |     |                           | 9  | 4  | 6  | 4  | 4  |    | 11  | 67  | 63  |   | 82  | 74  |
|    |     |                           |    |    |    |    |    |    |     |     | 11  |   | 36  | 04  |

|    |      |                                                     |    |    |    |    |    |    |     |     |     |   |     |     |
|----|------|-----------------------------------------------------|----|----|----|----|----|----|-----|-----|-----|---|-----|-----|
| 14 | S100 | S100 calcium binding protein                        | 7. | 7. | 8. | 9. | 9. | 8. | 1.7 | 0.8 | 1.7 | U | 0.0 | 0.6 |
| 05 | A16  | A16                                                 | 97 | 69 | 36 | 20 | 12 | 15 | 598 | 154 | 59  | p | 39  | 63  |
| 76 |      |                                                     | 48 | 97 | 25 | 54 | 12 | 67 | 713 | 7   | 87  |   | 33  | 32  |
|    |      |                                                     |    | 1  | 7  | 7  | 8  | 4  | 88  |     | 13  |   | 42  | 74  |
|    |      |                                                     |    |    |    |    |    |    |     |     | 88  |   | 25  | 04  |
| 11 | CAC  | Calcium channel                                     | 8. | 8. | 8. | 7. | 7. | 8. | -1. | -0. | 1.7 | D | 0.0 | 0.6 |
| 09 | FD1  | flower domain                                       | 76 | 61 | 48 | 36 | 78 | 39 | 712 | 776 | 12  | o | 24  | 63  |
| 4  |      | containing 1                                        | 83 | 72 | 72 | 02 | 94 | 44 | 653 | 233 | 65  | w | 30  | 32  |
|    |      |                                                     | 8  | 3  | 4  | 3  | 7  | 5  | 542 | 333 | 35  | n | 44  | 74  |
|    |      |                                                     |    |    |    |    |    |    |     |     | 42  |   | 49  | 04  |
| 28 | CDH  | Cadherin 19, type 2                                 | 3. | 4. | 3. | 5. | 8. | 4. | 5.0 | 2.3 | 5.0 | U | 0.0 | 0.6 |
| 51 | 19   |                                                     | 63 | 08 | 82 | 95 | 14 | 44 | 400 | 334 | 40  | p | 25  | 63  |
| 3  |      |                                                     | 45 | 37 | 77 | 83 | 43 | 37 | 684 | 433 | 06  |   | 68  | 32  |
|    |      |                                                     | 8  | 3  | 3  | 1  | 4  | 2  | 71  | 33  | 84  |   | 44  | 74  |
|    |      |                                                     |    |    |    |    |    |    |     |     | 71  |   | 09  | 04  |
| 54 | PPIA | Peptidylprolyl isomerase A (cyclophilin A)          | 4. | 4. | 4. | 5. | 5. | 5. | 1.7 | 0.7 | 1.7 | U | 0.0 | 0.6 |
| 78 |      |                                                     | 30 | 53 | 83 | 54 | 03 | 39 | 041 | 690 | 04  | p | 07  | 63  |
|    |      |                                                     | 40 | 05 | 87 | 54 | 62 | 88 | 511 | 533 | 15  |   | 47  | 32  |
|    |      |                                                     | 3  | 7  | 9  | 7  | 2  | 6  | 88  | 33  | 11  |   | 57  | 74  |
|    |      |                                                     |    |    |    |    |    |    |     |     | 88  |   | 6   | 04  |
| 23 | DAA  | Dishevelled associated activator of morphogenesis 2 | 4. | 5. | 5. | 6. | 7. | 5. | 2.3 | 1.2 | 2.3 | U | 0.0 | 0.6 |
| 50 | M2   |                                                     | 87 | 71 | 28 | 77 | 11 | 58 | 025 | 032 | 02  | p | 23  | 63  |
| 0  |      |                                                     | 57 | 06 | 41 | 59 | 58 | 85 | 992 | 633 | 59  |   | 54  | 32  |
|    |      |                                                     | 9  | 7  |    | 5  | 7  | 3  | 35  | 33  | 92  |   | 54  | 74  |
|    |      |                                                     |    |    |    |    |    |    |     |     | 35  |   | 33  | 04  |
| 14 | FAM  | Family with sequence similarity 109 member A        | 6. | 6. | 6. | 5. | 5. | 6. | -1. | -0. | 1.5 | D | 0.0 | 0.6 |
| 47 | 109A |                                                     | 76 | 64 | 58 | 66 | 83 | 58 | 552 | 634 | 52  | o | 42  | 63  |
| 17 |      |                                                     | 35 | 27 | 32 | 64 | 56 | 32 | 665 | 746 | 66  | w | 93  | 32  |
|    |      |                                                     | 7  | 5  | 6  | 2  | 6  | 6  | 082 | 667 | 50  | n | 40  | 74  |

|    |      |                              |    |    |    |    |    |    |     |     |     |    |     |     |    |
|----|------|------------------------------|----|----|----|----|----|----|-----|-----|-----|----|-----|-----|----|
|    |      |                              |    |    |    |    |    |    |     |     |     | 82 |     | 74  | 04 |
| 41 | MAO  | Monoamine                    | 5. | 5. | 5. | 5. | 6. | 6. | 1.6 | 0.6 | 1.6 | U  | 0.0 | 0.6 |    |
| 29 | B    | oxidase B                    | 42 | 63 | 91 | 95 | 50 | 58 | 146 | 912 | 14  | p  | 19  | 63  |    |
|    |      |                              | 92 | 01 | 09 | 12 | 31 | 95 | 520 | 233 | 65  |    | 83  | 32  |    |
|    |      |                              | 3  | 3  | 3  | 6  | 6  | 4  | 82  | 33  | 20  |    | 60  | 74  |    |
|    |      |                              |    |    |    |    |    |    |     |     | 82  |    | 4   | 04  |    |
| 54 | SYT  | Synaptotagmin like           | 6. | 7. | 6. | 9. | 7. | 7. | 2.4 | 1.3 | 2.4 | U  | 0.0 | 0.6 |    |
| 84 | L2   | 2                            | 83 | 07 | 55 | 24 | 69 | 48 | 983 | 209 | 98  | p  | 23  | 63  |    |
| 3  |      |                              | 77 | 54 | 36 | 88 | 51 | 56 | 864 | 966 | 38  |    | 14  | 32  |    |
|    |      |                              | 1  |    | 1  | 6  | 8  | 7  | 79  | 67  | 64  |    | 46  | 74  |    |
|    |      |                              |    |    |    |    |    |    |     |     | 79  |    | 14  | 04  |    |
| 90 | SOC  | Suppressor of                | 3. | 3. | 3. | 7. | 7. | 4. | 6.7 | 2.7 | 6.7 | U  | 0.0 | 0.6 |    |
| 21 | S3   | cytokine signaling           | 80 | 80 | 37 | 01 | 61 | 62 | 529 | 555 | 52  | p  | 05  | 63  |    |
|    |      | 3                            | 75 | 73 | 76 | 37 | 69 | 84 | 755 | 233 | 97  |    | 99  | 32  |    |
|    |      |                              | 6  | 3  | 9  | 2  | 5  | 8  | 47  | 33  | 55  |    | 29  | 74  |    |
|    |      |                              |    |    |    |    |    |    |     |     | 47  |    | 86  | 04  |    |
| 14 | CSF2 | Colony stimulating           | 4. | 5. | 4. | 6. | 5. | 5. | 1.9 | 0.9 | 1.9 | U  | 0.0 | 0.6 |    |
| 39 | RB   | factor 2 receptor, $\beta$ , | 73 | 50 | 96 | 55 | 67 | 79 | 176 | 393 | 17  | p  | 17  | 63  |    |
|    |      | low-affinity                 | 34 | 67 | 26 | 41 | 63 | 01 | 241 | 2   | 62  |    | 17  | 32  |    |
|    |      | (granulocyte-macro           | 1  | 1  | 3  | 9  | 3  | 9  | 72  |     | 41  |    | 74  | 74  |    |
|    |      | phage)                       |    |    |    |    |    |    |     |     | 72  |    | 15  | 04  |    |
| 24 | NR5  | Nuclear receptor             | 8. | 7. | 8. | 7. | 7. | 8. | -1. | -0. | 1.7 | D  | 0.0 | 0.6 |    |
| 94 | A2   | subfamily 5 group            | 22 | 99 | 66 | 09 | 03 | 21 | 795 | 844 | 95  | o  | 47  | 63  |    |
|    |      | A member 2                   | 22 | 80 | 22 | 94 | 96 | 08 | 322 | 243 | 32  | w  | 05  | 32  |    |
|    |      |                              | 6  | 7  | 7  | 3  | 4  |    | 885 | 333 | 28  | n  | 81  | 74  |    |
|    |      |                              |    |    |    |    |    |    |     |     | 85  |    | 75  | 04  |    |
| 23 | LRR  | Leucine-rich repeat          | 7. | 6. | 7. | 5. | 6. | 6. | -1. | -0. | 1.8 | D  | 0.0 | 0.6 |    |
| 50 | C8B  | containing 8 family          | 61 | 63 | 23 | 77 | 47 | 46 | 892 | 920 | 92  | o  | 21  | 63  |    |
| 7  |      | member B                     | 32 | 15 | 21 | 22 | 54 | 71 | 985 | 663 | 98  | w  | 12  | 32  |    |

|    |      |                                     |    |    |    |    |    |    |     |     |     |   |     |     |
|----|------|-------------------------------------|----|----|----|----|----|----|-----|-----|-----|---|-----|-----|
|    |      |                                     | 9  |    |    | 7  | 9  | 4  | 465 | 333 | 54  | n | 34  | 74  |
|    |      |                                     |    |    |    |    |    |    |     |     | 65  |   | 44  | 04  |
| 11 | AP1S | Adaptor-related                     | 6. | 6. | 6. | 6. | 5. | 6. | -1. | -0. | 1.6 | D | 0.0 | 0.6 |
| 74 | 1    | protein complex 1                   | 66 | 88 | 92 | 18 | 83 | 38 | 612 | 689 | 12  | o | 09  | 63  |
|    |      | $\Sigma$ 1 subunit                  | 56 | 28 | 05 | 07 | 66 | 43 | 277 | 1   | 27  | w | 21  | 32  |
|    |      |                                     | 8  | 3  | 1  | 3  | 8  | 1  | 414 |     | 74  | n | 37  | 74  |
|    |      |                                     |    |    |    |    |    |    |     |     | 14  |   | 05  | 04  |
| 50 | NTM  | Neurotrimin                         | 4. | 6. | 5. | 7. | 7. | 6. | 3.1 | 1.6 | 3.1 | U | 0.0 | 0.6 |
| 86 |      |                                     | 93 | 40 | 64 | 90 | 49 | 51 | 332 | 476 | 33  | p | 09  | 63  |
| 3  |      |                                     | 26 | 12 | 04 | 67 | 68 | 37 | 502 | 6   | 25  |   | 72  | 32  |
|    |      |                                     | 7  | 2  | 5  | 5  | 2  | 5  | 48  |     | 02  |   | 42  | 74  |
|    |      |                                     |    |    |    |    |    |    |     |     | 48  |   | 11  | 04  |
| 64 | ST6  | ST6                                 | 5. | 5. | 6. | 6. | 6. | 6. | 1.8 | 0.8 | 1.8 | U | 0.0 | 0.6 |
| 80 | GAL  | $\beta$ -galactosamide              | 46 | 14 | 14 | 91 | 48 | 03 | 552 | 916 | 55  | p | 28  | 63  |
|    | 1    | $\alpha$ -2,6-sialyltransferase 1   | 31 | 93 | 58 | 85 | 27 | 19 | 496 | 133 | 24  |   | 83  | 32  |
|    |      |                                     | 9  | 2  | 1  | 2  |    | 4  | 48  | 33  | 96  |   | 62  | 74  |
|    |      |                                     |    |    |    |    |    |    |     |     | 48  |   | 8   | 04  |
| 14 | GLT1 | Glycosyltransferase 1 domain        | 5. | 6. | 5. | 4. | 4. | 5. | -2. | -1. | 2.1 | D | 0.0 | 0.6 |
| 44 | D1   | containing 1                        | 58 | 87 | 70 | 38 | 77 | 70 | 148 | 103 | 48  | o | 43  | 63  |
| 23 |      |                                     | 39 | 82 | 49 | 22 | 32 | 15 | 530 | 35  | 53  | w | 97  | 32  |
|    |      |                                     | 1  | 1  |    | 2  | 3  | 2  | 117 |     | 01  | n | 45  | 74  |
|    |      |                                     |    |    |    |    |    |    |     |     | 17  |   | 63  | 04  |
| 95 | CCL  | Chemokine (C-C motif) ligand 4-like | 5. | 6. | 6. | 6. | 8. | 7. | 2.2 | 1.1 | 2.2 | U | 0.0 | 0.6 |
| 60 | 4L2  | 2                                   | 72 | 37 | 64 | 68 | 05 | 55 | 685 | 817 | 68  | p | 19  | 63  |
|    |      |                                     | 31 | 54 | 34 | 61 | 00 | 12 | 807 | 9   | 58  |   | 15  | 32  |
|    |      |                                     | 6  | 2  | 5  |    | 8  | 2  | 29  |     | 07  |   | 84  | 74  |
|    |      |                                     |    |    |    |    |    |    |     |     | 29  |   | 57  | 04  |
| 79 | ZNF  | Zinc finger protein                 | 7. | 7. | 7. | 6. | 7. | 6. | -1. | -0. | 1.7 | D | 0.0 | 0.6 |
| 89 | 671  | 671                                 | 62 | 56 | 68 | 47 | 09 | 96 | 719 | 782 | 19  | o | 05  | 63  |

|    |       |                    |    |    |    |    |    |    |     |     |     |   |     |     |
|----|-------|--------------------|----|----|----|----|----|----|-----|-----|-----|---|-----|-----|
| 1  |       |                    | 79 | 82 | 88 | 82 | 83 | 16 | 842 | 276 | 84  | w | 78  | 32  |
|    |       |                    |    | 6  | 7  | 7  | 3  |    | 756 | 667 | 27  | n | 98  | 74  |
|    |       |                    |    |    |    |    |    |    |     |     | 56  |   | 08  | 04  |
| 14 | C1orf | Chromosome 1       | 7. | 6. | 7. | 5. | 5. | 6. | -2. | -1. | 2.0 | D | 0.0 | 0.6 |
| 94 | 210   | open reading frame | 17 | 36 | 33 | 37 | 62 | 79 | 042 | 030 | 42  | o | 45  | 63  |
| 66 |       | 210                | 84 | 20 | 62 | 11 | 42 | 00 | 609 | 413 | 60  | w | 54  | 32  |
|    |       |                    | 9  | 7  |    | 9  | 8  | 5  | 377 | 333 | 93  | n | 02  | 74  |
|    |       |                    |    |    |    |    |    |    |     |     | 77  |   | 21  | 04  |
| 25 | WW    | WW domain          | 7. | 7. | 7. | 9. | 8. | 7. | 1.7 | 0.8 | 1.7 | U | 0.0 | 0.6 |
| 93 | TR1   | containing         | 93 | 67 | 74 | 34 | 50 | 99 | 746 | 275 | 74  | p | 42  | 63  |
| 7  |       | transcription      | 88 | 86 | 48 | 97 | 39 | 13 | 485 | 333 | 64  |   | 29  | 32  |
|    |       | regulator 1        | 5  | 7  | 9  | 5  |    | 6  | 38  | 33  | 85  |   | 64  | 74  |
|    |       |                    |    |    |    |    |    |    |     |     | 38  |   | 25  | 04  |
| 93 | ASIC  | Acid sensing ion   | 6. | 6. | 6. | 5. | 5. | 5. | -1. | -0. | 1.6 | D | 0.0 | 0.6 |
| 11 | 3     | channel 3          | 06 | 36 | 15 | 29 | 31 | 94 | 601 | 679 | 01  | o | 18  | 63  |
|    |       |                    | 90 | 25 | 93 | 60 | 01 | 77 | 055 | 023 | 05  | w | 51  | 32  |
|    |       |                    | 4  |    | 7  | 1  | 1  | 2  | 516 | 333 | 55  | n | 46  | 74  |
|    |       |                    |    |    |    |    |    |    |     |     | 16  |   | 88  | 04  |
| 79 | AGB   | ATP/GTP binding    | 4. | 4. | 4. | 3. | 3. | 3. | -1. | -0. | 1.8 | D | 0.0 | 0.6 |
| 84 | L2    | protein-like 2     | 50 | 14 | 70 | 38 | 74 | 52 | 870 | 903 | 70  | o | 01  | 63  |
| 1  |       |                    | 96 | 20 | 69 | 06 | 20 | 59 | 425 | 366 | 42  | w | 63  | 32  |
|    |       |                    | 8  | 9  | 4  | 4  | 1  | 6  | 711 | 667 | 57  | n | 48  | 74  |
|    |       |                    |    |    |    |    |    |    |     |     | 11  |   | 88  | 04  |
| 20 | TME   | Transmembrane      | 6. | 6. | 6. | 5. | 6. | 6. | -1. | -0. | 1.5 | D | 0.0 | 0.6 |
| 29 | M18   | protein 184A       | 84 | 88 | 98 | 86 | 40 | 44 | 587 | 667 | 87  | o | 12  | 63  |
| 15 | 4A    |                    | 11 | 82 | 21 | 8  | 02 | 19 | 874 | 096 | 87  | w | 31  | 32  |
|    |       |                    | 8  | 3  |    |    | 5  | 7  | 253 | 667 | 42  | n | 56  | 74  |
|    |       |                    |    |    |    |    |    |    |     |     | 53  |   | 99  | 04  |
| 25 | REX   | RNA exonuclease    | 6. | 5. | 6. | 8. | 6. | 7. | 2.2 | 1.1 | 2.2 | U | 0.0 | 0.6 |



|               |              |                                                         |                     |                     |                     |                     |                     |                     |                          |                          |                             |                  |                             |                             |
|---------------|--------------|---------------------------------------------------------|---------------------|---------------------|---------------------|---------------------|---------------------|---------------------|--------------------------|--------------------------|-----------------------------|------------------|-----------------------------|-----------------------------|
| 99<br>6       | O2           | 2                                                       | 05<br>07<br>7       | 58<br>70<br>4       | 84<br>93<br>1       | 00<br>12<br>9       | 89<br>78<br>1       | 12<br>08<br>6       | 620<br>225<br>84         | 776<br>133<br>33         | 62<br>02<br>25<br>84        | p                | 21<br>98<br>39<br>33        | 63<br>32<br>74<br>04        |
| 28<br>79<br>7 | IGLV<br>3-19 | Immunoglobulin<br>lambda variable<br>3-19               | 4.<br>55<br>85<br>3 | 4.<br>63<br>56<br>7 | 4.<br>74<br>19      | 5.<br>04<br>92<br>9 | 6.<br>59<br>54<br>3 | 5.<br>63<br>71      | 2.1<br>663<br>104<br>38  | 1.1<br>152<br>4          | 2.1<br>66<br>31<br>04<br>38 | U<br>p           | 0.0<br>18<br>80<br>78<br>32 | 0.6<br>63<br>32<br>74<br>04 |
| 95<br>81      | PRE<br>PL    | Prolyl<br>endopeptidase-like                            | 7.<br>76<br>01<br>8 | 7.<br>60<br>34<br>6 | 7.<br>29<br>54      | 6.<br>38<br>88<br>3 | 6.<br>75<br>44<br>9 | 7.<br>34<br>09<br>5 | -1.<br>652<br>812<br>801 | -0.<br>724<br>923<br>333 | 1.6<br>52<br>81<br>28<br>01 | D<br>o<br>w<br>n | 0.0<br>31<br>88<br>07<br>15 | 0.6<br>63<br>32<br>74<br>04 |
| 41<br>73      | MC<br>M4     | Minichromosome<br>maintenance<br>complex<br>component 4 | 3.<br>44<br>50<br>5 | 3.<br>72<br>74<br>8 | 3.<br>81<br>37      | 4.<br>82<br>68<br>7 | 5.<br>00<br>81<br>3 | 4.<br>02<br>67<br>6 | 1.9<br>433<br>018<br>37  | 0.9<br>585<br>1<br>37    | 1.9<br>43<br>30<br>18<br>37 | U<br>p           | 0.0<br>08<br>72<br>52<br>61 | 0.6<br>63<br>32<br>74<br>04 |
| 29<br>09<br>4 | LGA<br>LSL   | Lectin,<br>galactoside-binding<br>-like                 | 8.<br>53<br>77<br>6 | 7.<br>60<br>37<br>1 | 8.<br>49<br>27      | 7.<br>17<br>28<br>2 | 7.<br>42<br>97<br>1 | 7.<br>84<br>29<br>6 | -1.<br>658<br>163<br>958 | -0.<br>729<br>586<br>667 | 1.6<br>58<br>16<br>39<br>58 | D<br>o<br>w<br>n | 0.0<br>48<br>21<br>70<br>26 | 0.6<br>63<br>32<br>74<br>04 |
| 32<br>68      | AGF<br>G2    | Arfgap with FG<br>repeats 2                             | 7.<br>45<br>13      | 7.<br>22<br>62<br>2 | 6.<br>99<br>76<br>9 | 5.<br>29<br>05<br>7 | 6.<br>13<br>01<br>8 | 6.<br>87<br>33<br>9 | -2.<br>184<br>076<br>415 | -1.<br>127<br>023<br>333 | 2.1<br>84<br>07<br>64<br>15 | D<br>o<br>w<br>n | 0.0<br>22<br>10<br>08<br>76 | 0.6<br>63<br>32<br>74<br>04 |

|                           |                          |                                                           |                     |                     |                     |                     |                     |                     |                          |                                     |                             |                  |                             |                             |
|---------------------------|--------------------------|-----------------------------------------------------------|---------------------|---------------------|---------------------|---------------------|---------------------|---------------------|--------------------------|-------------------------------------|-----------------------------|------------------|-----------------------------|-----------------------------|
| 10<br>02<br>88<br>77<br>8 | LOC<br>1002<br>8877<br>8 | WAS protein<br>family homolog 1<br>pseudogene             | 8.<br>71<br>93<br>2 | 8.<br>39<br>44<br>1 | 7.<br>93<br>59<br>2 | 7.<br>33<br>68<br>8 | 7.<br>98<br>36<br>5 | 7.<br>74<br>07      | -1.<br>583<br>159<br>561 | -0.<br>662<br>806<br>667            | 1.5<br>83<br>15<br>95<br>61 | D<br>o<br>w<br>n | 0.0<br>38<br>99<br>95<br>13 | 0.6<br>63<br>32<br>74<br>04 |
| 29<br>08<br>9             | UBE<br>2T                | Ubiquitin<br>conjugating<br>enzyme E2T                    | 3.<br>99<br>91<br>2 | 4.<br>96<br>07<br>1 | 4.<br>70<br>23<br>4 | 6.<br>05<br>56<br>3 | 5.<br>64<br>01<br>5 | 4.<br>75<br>93<br>6 | 1.9<br>065<br>838<br>75  | 0.9<br>309<br>9<br>75               | 1.9<br>06<br>58<br>38<br>75 | U<br>p           | 0.0<br>45<br>37<br>53<br>97 | 0.6<br>63<br>32<br>74<br>04 |
| 33<br>09                  | HSP<br>A5                | Heat shock protein<br>family A (Hsp70)<br>member 5        | 8.<br>58<br>60<br>2 | 7.<br>36<br>77<br>9 | 8.<br>54<br>10<br>1 | 8.<br>98<br>42<br>4 | 8.<br>78<br>89<br>4 | 9.<br>44<br>92      | 1.8<br>779<br>691<br>11  | 0.9<br>091<br>733<br>33<br>911<br>1 | 1.8<br>77<br>96<br>911<br>1 | U<br>p           | 0.0<br>40<br>18<br>43<br>86 | 0.6<br>63<br>32<br>74<br>04 |
| 27<br>35                  | GLI1                     | GLI family zinc<br>finger 1                               | 4.<br>58<br>37<br>8 | 4.<br>97<br>02<br>7 | 5.<br>19<br>95<br>6 | 5.<br>89<br>53<br>3 | 5.<br>58<br>27<br>2 | 5.<br>24<br>79<br>2 | 1.5<br>772<br>958<br>99  | 0.6<br>574<br>533<br>33             | 1.5<br>77<br>29<br>58<br>99 | U<br>p           | 0.0<br>27<br>00<br>38<br>97 | 0.6<br>63<br>32<br>74<br>04 |
| 28<br>89<br>8             | IGK<br>V1D-<br>27        | Immunoglobulin $\kappa$<br>variable 1D-27<br>(pseudogene) | 5.<br>42<br>99<br>9 | 4.<br>89<br>86<br>3 | 5.<br>48<br>02<br>1 | 6.<br>01<br>56<br>4 | 9.<br>11<br>58<br>5 | 8.<br>90<br>33<br>7 | 6.6<br>900<br>175<br>71  | 2.7<br>420<br>1<br>71               | 6.6<br>90<br>01<br>75<br>71 | U<br>p           | 0.0<br>09<br>79<br>54<br>34 | 0.6<br>63<br>32<br>74<br>04 |
| 27<br>13<br>4             | TJP3                     | Tight junction<br>protein 3                               | 7.<br>07            | 6.<br>31<br>32<br>6 | 6.<br>36<br>61<br>1 | 5.<br>41<br>67<br>7 | 6.<br>03<br>59<br>9 | 6.<br>19<br>59<br>3 | -1.<br>624<br>760<br>044 | -0.<br>700<br>226<br>667            | 1.6<br>24<br>76<br>00       | D<br>o<br>w<br>n | 0.0<br>47<br>67<br>81       | 0.6<br>63<br>32<br>74       |

|               |                 |                                                                                                                   |                     |                     |                     |                       |                     |                     |                          |                          |                             |                  |                             |                             |    |
|---------------|-----------------|-------------------------------------------------------------------------------------------------------------------|---------------------|---------------------|---------------------|-----------------------|---------------------|---------------------|--------------------------|--------------------------|-----------------------------|------------------|-----------------------------|-----------------------------|----|
|               |                 |                                                                                                                   |                     |                     |                     |                       |                     |                     |                          |                          |                             | 44               |                             | 25                          | 04 |
| 29<br>92      | GYG<br>1        | Glycogenin 1                                                                                                      | 4.<br>95<br>25<br>1 | 4.<br>57<br>98<br>2 | 5.<br>27<br>40<br>5 | 6.<br>30<br>69<br>5   | 5.<br>25<br>21<br>1 | 5.<br>85<br>52<br>4 | 1.8<br>268<br>058<br>73  | 0.8<br>693<br>233<br>33  | 1.8<br>26<br>80<br>58<br>73 | U<br>p           | 0.0<br>25<br>13<br>67<br>75 | 0.6<br>63<br>32<br>74<br>04 |    |
| 20<br>78      | ERG             | V-ets avian<br>erythroblastosis<br>virus E26<br>oncogene homolog                                                  | 3.<br>25<br>88<br>7 | 3.<br>55<br>83<br>3 | 3.<br>55<br>48<br>5 | 4.<br>93<br>58<br>3   | 5.<br>21<br>10<br>7 | 3.<br>90<br>60<br>8 | 2.3<br>407<br>594<br>25  | 1.2<br>269<br>766<br>67  | 2.3<br>40<br>75<br>94<br>25 | U<br>p           | 0.0<br>07<br>17<br>52<br>75 | 0.6<br>63<br>32<br>74<br>04 |    |
| 84<br>04      | SPA<br>RCL<br>1 | SPARC like 1                                                                                                      | 5.<br>86<br>12<br>3 | 8.<br>44<br>72<br>7 | 7.<br>72<br>48<br>4 | 10.<br>.6<br>38<br>74 | 9.<br>93<br>54<br>4 | 8.<br>89<br>96<br>4 | 5.5<br>795<br>418<br>62  | 2.4<br>801<br>466<br>67  | 5.5<br>79<br>54<br>18<br>62 | U<br>p           | 0.0<br>09<br>97<br>69<br>79 | 0.6<br>63<br>32<br>74<br>04 |    |
| 84<br>66<br>8 | FAM<br>126A     | Family with<br>sequence similarity<br>126 member A                                                                | 6.<br>55<br>15<br>6 | 7.<br>42<br>43<br>2 | 6.<br>50<br>16<br>5 | 8.<br>47<br>58<br>6   | 8.<br>10<br>21<br>3 | 7.<br>31<br>96<br>3 | 2.2<br>038<br>407<br>83  | 1.1<br>400<br>2<br>83    | 2.2<br>03<br>84<br>07<br>83 | U<br>p           | 0.0<br>17<br>61<br>71<br>54 | 0.6<br>63<br>32<br>74<br>04 |    |
| 11<br>32<br>0 | MGA<br>T4A      | Mannosyl<br>( $\alpha$ -1,3-)-glycoprote<br>in<br>$\beta$ -1,4-N-acetylgluc<br>osaminyltransferas<br>e, isozyme A | 4.<br>10<br>95<br>6 | 4.<br>47<br>76<br>2 | 3.<br>95<br>92<br>2 | 3.<br>51<br>54<br>1   | 3.<br>58<br>42<br>9 | 3.<br>68<br>89<br>9 | -1.<br>500<br>971<br>586 | -0.<br>585<br>896<br>667 | 1.5<br>00<br>97<br>15<br>86 | D<br>o<br>w<br>n | 0.0<br>08<br>11<br>89<br>14 | 0.6<br>63<br>32<br>74<br>04 |    |
| 51<br>75      | PEC<br>AM1      | Platelet/endothelial<br>cell adhesion                                                                             | 4.<br>65            | 5.<br>05            | 5.<br>67            | 7.<br>32              | 7.<br>41            | 5.<br>65            | 3.1<br>812               | 1.6<br>696               | 3.1<br>81                   | U<br>p           | 0.0<br>13                   | 0.6<br>63                   |    |

|                |                  |                                                                 |                     |                     |                     |                     |                     |                     |                          |                          |                             |                  |                             |                             |
|----------------|------------------|-----------------------------------------------------------------|---------------------|---------------------|---------------------|---------------------|---------------------|---------------------|--------------------------|--------------------------|-----------------------------|------------------|-----------------------------|-----------------------------|
|                |                  | molecule 1                                                      | 68<br>3             | 06<br>1             | 26<br>8             | 01<br>7             | 61<br>3             | 26<br>3             | 711<br>29                | 033<br>33                | 27<br>11<br>29              |                  | 07<br>47<br>22              | 32<br>74<br>04              |
| 38<br>7        | RHO<br>A         | Ras homolog<br>family member A                                  | 8.<br>08<br>55<br>4 | 7.<br>25<br>41<br>7 | 8.<br>01<br>01<br>4 | 8.<br>74<br>92<br>1 | 8.<br>13<br>27<br>6 | 8.<br>46<br>09<br>2 | 1.5<br>848<br>504<br>01  | 0.6<br>643<br>466<br>67  | 1.5<br>84<br>85<br>04<br>01 | U<br>p           | 0.0<br>47<br>75<br>10<br>86 | 0.6<br>63<br>32<br>74<br>04 |
| 21<br>96<br>54 | ZCC<br>HC2<br>4  | Zinc finger, CCHC<br>domain containing<br>24                    | 5.<br>26<br>94<br>5 | 7.<br>14<br>92<br>1 | 6.<br>46<br>51      | 8.<br>77<br>74<br>8 | 7.<br>64<br>77<br>2 | 7.<br>05<br>88<br>9 | 2.8<br>947<br>591<br>81  | 1.5<br>334<br>433<br>33  | 2.8<br>94<br>75<br>91<br>81 | U<br>p           | 0.0<br>33<br>17<br>01<br>53 | 0.6<br>63<br>32<br>74<br>04 |
| 28<br>32<br>19 | KCT<br>D21       | Potassium channel<br>tetramerization<br>domain containing<br>21 | 6.<br>17<br>68<br>2 | 5.<br>91<br>38<br>6 | 6.<br>47<br>93      | 5.<br>34<br>00<br>4 | 5.<br>27<br>03<br>2 | 5.<br>80<br>38<br>1 | -1.<br>645<br>588<br>177 | -0.<br>718<br>603<br>333 | 1.6<br>45<br>58<br>81<br>77 | D<br>o<br>w<br>n | 0.0<br>14<br>78<br>24<br>45 | 0.6<br>63<br>32<br>74<br>04 |
| 72<br>99<br>74 | RFP<br>L4A<br>L1 | Ret finger<br>protein-like<br>4A-like 1                         | 4.<br>49<br>86<br>4 | 4.<br>13<br>04<br>2 | 5.<br>02<br>82<br>1 | 3.<br>46<br>77<br>1 | 3.<br>92<br>05<br>5 | 4.<br>18<br>26<br>1 | -1.<br>619<br>408<br>176 | -0.<br>695<br>466<br>667 | 1.6<br>19<br>40<br>81<br>76 | D<br>o<br>w<br>n | 0.0<br>39<br>53<br>41<br>22 | 0.6<br>63<br>32<br>74<br>04 |
| 18<br>07       | DPY<br>S         | Dihydropyrimidina<br>se                                         | 8.<br>15<br>29<br>9 | 8.<br>52<br>93<br>2 | 8.<br>53<br>75<br>3 | 5.<br>73<br>42<br>8 | 7.<br>51<br>19<br>4 | 7.<br>94<br>93<br>7 | -2.<br>534<br>000<br>25  | -1.<br>341<br>416<br>667 | 2.5<br>34<br>00<br>02<br>5  | D<br>o<br>w<br>n | 0.0<br>41<br>41<br>28<br>07 | 0.6<br>63<br>32<br>74<br>04 |
| 12             | OSC              | Organic solute                                                  | 5.                  | 4.                  | 5.                  | 4.                  | 3.                  | 4.                  | -1.                      | -0.                      | 1.8                         | D                | 0.0                         | 0.6                         |

|                |              |                                                       |                      |                      |                     |                     |                     |                      |                          |                          |                             |                  |                             |                             |
|----------------|--------------|-------------------------------------------------------|----------------------|----------------------|---------------------|---------------------|---------------------|----------------------|--------------------------|--------------------------|-----------------------------|------------------|-----------------------------|-----------------------------|
| 77<br>00       | P1           | carrier partner 1                                     | 05<br>05<br>1        | 72<br>79<br>1        | 19<br>36<br>7       | 07<br>13<br>2       | 94<br>32<br>1       | 19<br>16<br>3        | 894<br>709<br>497        | 921<br>976<br>667        | 94<br>70<br>94<br>97        | o<br>w<br>n      | 00<br>87<br>24<br>36        | 63<br>32<br>74<br>04        |
| 19<br>38       | EEF2         | Eukaryotic<br>translation<br>elongation factor 2      | 8.<br>08<br>61<br>3  | 7.<br>82<br>34<br>8  | 8.<br>26<br>31<br>9 | 9.<br>78<br>79<br>5 | 8.<br>11<br>95<br>3 | 9.<br>11<br>84<br>8  | 1.9<br>332<br>836<br>62  | 0.9<br>510<br>533<br>33  | 1.9<br>33<br>28<br>36<br>62 | U<br>p           | 0.0<br>49<br>92<br>43<br>3  | 0.6<br>63<br>32<br>74<br>04 |
| 26<br>05<br>1  | PPP1<br>R16B | Protein<br>phosphatase 1<br>regulatory subunit<br>16B | 4.<br>68<br>78<br>7  | 4.<br>87<br>98<br>1  | 5.<br>30<br>38<br>1 | 6.<br>24<br>73<br>5 | 6.<br>13<br>37<br>6 | 5.<br>15<br>21<br>6  | 1.8<br>496<br>385<br>01  | 0.8<br>872<br>433<br>33  | 1.8<br>49<br>63<br>85<br>01 | U<br>p           | 0.0<br>29<br>31<br>93<br>13 | 0.6<br>63<br>32<br>74<br>04 |
| 11<br>62<br>55 | MOG<br>AT1   | Monoacylglycerol<br>O-acyltransferase 1               | 10<br>.5<br>37<br>48 | 10<br>.5<br>37<br>32 | 9.<br>79<br>54<br>4 | 8.<br>47<br>51<br>1 | 9.<br>41<br>55<br>2 | 9.<br>73<br>27<br>8  | -2.<br>117<br>374<br>801 | -1.<br>082<br>276<br>667 | 2.1<br>17<br>37<br>48<br>01 | D<br>o<br>w<br>n | 0.0<br>21<br>08<br>15<br>31 | 0.6<br>63<br>32<br>74<br>04 |
| 54<br>47<br>2  | TOL<br>LIP   | Toll interacting<br>protein                           | 8.<br>79<br>48<br>2  | 8.<br>68<br>51<br>8  | 8.<br>31<br>06<br>5 | 7.<br>54<br>83<br>4 | 8.<br>15<br>17<br>5 | 8.<br>16<br>86<br>9  | -1.<br>559<br>002<br>599 | -0.<br>640<br>623<br>333 | 1.5<br>59<br>00<br>25<br>99 | D<br>o<br>w<br>n | 0.0<br>28<br>75<br>79<br>11 | 0.6<br>63<br>32<br>74<br>04 |
| 84<br>61<br>7  | TUB<br>B6    | Tubulin, $\beta$ 6 class<br>V                         | 6.<br>43<br>15<br>1  | 7.<br>91<br>76<br>3  | 6.<br>84<br>60<br>9 | 9.<br>95<br>68<br>8 | 9.<br>08<br>36<br>5 | 8.<br>17<br>31<br>09 | 4.0<br>170<br>414<br>09  | 2.0<br>061<br>333<br>33  | 4.0<br>17<br>04<br>14<br>09 | U<br>p           | 0.0<br>06<br>87<br>60<br>5  | 0.6<br>63<br>32<br>74<br>04 |

|    |      |                      |    |    |    |    |    |    |     |     |     |   |     |     |
|----|------|----------------------|----|----|----|----|----|----|-----|-----|-----|---|-----|-----|
| 11 | CLC  | Chloride channel,    | 7. | 7. | 6. | 5. | 5. | 6. | -1. | -0. | 1.8 | D | 0.0 | 0.6 |
| 84 | N5   | voltage-sensitive 5  | 18 | 06 | 66 | 53 | 94 | 88 | 805 | 852 | 05  | o | 46  | 63  |
|    |      |                      | 78 | 63 | 01 | 32 | 24 | 15 | 418 | 333 | 41  | w | 47  | 32  |
|    |      |                      | 2  |    | 8  | 7  | 6  | 7  | 547 | 333 | 85  | n | 52  | 74  |
|    |      |                      |    |    |    |    |    |    |     |     | 47  |   | 92  | 04  |
| 22 | CFA  | Cilia and flagella   | 4. | 4. | 4. | 3. | 4. | 4. | -1. | -0. | 1.6 | D | 0.0 | 0.6 |
| 01 | P53  | associated protein   | 81 | 45 | 68 | 83 | 01 | 04 | 608 | 685 | 08  | o | 02  | 63  |
| 36 |      | 53                   | 88 | 36 | 13 | 45 | 90 | 43 | 036 | 3   | 03  | w | 36  | 32  |
|    |      |                      | 3  | 9  | 5  | 5  | 8  | 4  | 328 |     | 63  | n | 69  | 74  |
|    |      |                      |    |    |    |    |    |    |     |     | 28  |   | 4   | 04  |
| 79 | ARH  | Rho gtpase           | 4. | 5. | 4. | 5. | 5. | 5. | 2.1 | 1.0 | 2.1 | U | 0.0 | 0.6 |
| 82 | GAP  | activating protein   | 32 | 23 | 40 | 89 | 66 | 68 | 313 | 917 | 31  | p | 04  | 63  |
| 2  | 28   | 28                   | 35 | 22 | 94 | 28 | 27 | 48 | 339 | 566 | 33  |   | 09  | 32  |
|    |      |                      | 1  | 6  | 5  | 6  | 4  | 9  | 59  | 67  | 39  |   | 99  | 74  |
|    |      |                      |    |    |    |    |    |    |     |     | 59  |   | 41  | 04  |
| 31 | HLA  | Major                | 6. | 7. | 7. | 9. | 8. | 8. | 2.1 | 1.1 | 2.1 | U | 0.0 | 0.6 |
| 22 | -DR  | histocompatibility   | 93 | 81 | 96 | 00 | 47 | 63 | 901 | 31  | 90  | p | 07  | 63  |
|    | A    | complex, class II,   | 9  | 23 | 84 | 26 | 93 | 08 | 049 |     | 10  |   | 14  | 32  |
|    |      | DR $\alpha$          |    | 7  | 5  | 2  | 6  | 4  | 42  |     | 49  |   | 36  | 74  |
|    |      |                      |    |    |    |    |    |    |     |     | 42  |   | 92  | 04  |
| 55 | SRG  | Serglycin            | 6. | 6. | 6. | 8. | 8. | 7. | 3.1 | 1.6 | 3.1 | U | 0.0 | 0.6 |
| 52 | N    |                      | 38 | 77 | 85 | 41 | 79 | 73 | 225 | 427 | 22  | p | 00  | 63  |
|    |      |                      | 69 | 52 | 82 | 37 | 72 | 75 | 831 | 4   | 58  |   | 80  | 32  |
|    |      |                      | 2  | 6  | 2  | 8  | 7  | 7  | 73  |     | 31  |   | 31  | 74  |
|    |      |                      |    |    |    |    |    |    |     |     | 73  |   | 85  | 04  |
| 10 | EDIL | EGF-like repeats     | 6. | 8. | 5. | 10 | 8. | 8. | 4.3 | 2.1 | 4.3 | U | 0.0 | 0.6 |
| 08 | 3    | and discoidin I-like | 53 | 19 | 90 | .2 | 42 | 36 | 326 | 152 | 32  | p | 19  | 63  |
| 5  |      | domains 3            | 87 | 79 | 87 | 01 | 00 | 96 | 709 | 566 | 67  |   | 43  | 32  |
|    |      |                      | 2  |    | 1  | 38 | 8  | 4  | 29  | 67  | 09  |   | 03  | 74  |

|    |      |                          |    |    |    |    |    |    |     |     |     |   |     |     |
|----|------|--------------------------|----|----|----|----|----|----|-----|-----|-----|---|-----|-----|
|    |      |                          |    |    |    |    |    |    |     |     | 29  |   | 25  | 04  |
| 87 | CTN  | Catenin $\alpha$ -like 1 | 5. | 5. | 6. | 8. | 7. | 6. | 3.4 | 1.8 | 3.4 | U | 0.0 | 0.6 |
| 27 | NAL  |                          | 73 | 50 | 17 | 01 | 88 | 91 | 860 | 016 | 86  | p | 00  | 63  |
|    | 1    |                          | 75 | 03 | 72 | 93 | 53 | 53 | 662 |     | 06  |   | 98  | 32  |
|    |      |                          | 5  | 7  | 7  | 6  | 1  | 2  | 81  |     | 62  |   | 83  | 74  |
|    |      |                          |    |    |    |    |    |    |     |     | 81  |   | 27  | 04  |
| 67 | STC1 | Stanniocalcin 1          | 3. | 4. | 3. | 5. | 6. | 3. | 2.5 | 1.3 | 2.5 | U | 0.0 | 0.6 |
| 81 |      |                          | 39 | 00 | 67 | 04 | 31 | 82 | 924 | 743 | 92  | p | 46  | 63  |
|    |      |                          | 12 | 27 | 11 | 22 | 86 | 72 | 748 | 3   | 47  |   | 95  | 32  |
|    |      |                          | 2  |    | 4  | 5  |    |    | 62  |     | 48  |   | 53  | 74  |
|    |      |                          |    |    |    |    |    |    |     |     | 62  |   | 6   | 04  |
| 10 | STA  | Star related lipid       | 11 | 10 | 11 | 9. | 10 | 10 | -1. | -0. | 1.7 | D | 0.0 | 0.6 |
| 80 | RD1  | transfer domain          | .0 | .7 | .3 | 83 | .1 | .7 | 766 | 821 | 66  | o | 19  | 63  |
| 9  | 0    | containing 10            | 98 | 70 | 51 | 78 | 56 | 61 | 797 | 136 | 79  | w | 81  | 32  |
|    |      |                          | 01 | 26 | 02 | 4  | 39 | 65 | 464 | 667 | 74  | n | 44  | 74  |
|    |      |                          |    |    |    |    |    |    |     |     | 64  |   | 03  | 04  |
| 54 | EPS8 | EPS8 like 1              | 8. | 7. | 7. | 6. | 7. | 6. | -1. | -0. | 1.5 | D | 0.0 | 0.6 |
| 86 | L1   |                          | 08 | 62 | 48 | 73 | 52 | 93 | 582 | 662 | 82  | o | 40  | 63  |
| 9  |      |                          | 47 | 39 | 10 | 89 | 69 | 77 | 314 | 036 | 31  | w | 70  | 32  |
|    |      |                          | 8  | 2  | 8  | 4  | 9  | 4  | 817 | 667 | 48  | n | 02  | 74  |
|    |      |                          |    |    |    |    |    |    |     |     | 17  |   | 24  | 04  |
| 55 | RAB  | RAB20, member            | 9. | 8. | 9. | 8. | 8. | 8. | -1. | -0. | 1.5 | D | 0.0 | 0.6 |
| 64 | 20   | RAS oncogene             | 42 | 88 | 15 | 38 | 75 | 51 | 521 | 605 | 21  | o | 17  | 63  |
| 7  |      | family                   | 55 | 22 | 75 | 30 | 13 | 46 | 404 | 403 | 40  | w | 98  | 32  |
|    |      |                          | 1  |    | 2  | 1  | 7  | 4  | 032 | 333 | 40  | n | 01  | 74  |
|    |      |                          |    |    |    |    |    |    |     |     | 32  |   | 44  | 04  |
| 28 | ANK  | Ankyrin 1                | 6. | 5. | 4. | 4. | 4. | 4. | -1. | -0. | 1.9 | D | 0.0 | 0.6 |
| 6  | 1    |                          | 10 | 33 | 85 | 45 | 77 | 20 | 941 | 957 | 41  | o | 22  | 63  |
|    |      |                          | 89 | 22 | 88 | 23 | 32 | 32 | 385 | 086 | 38  | w | 27  | 32  |

|    |     |                     |    |    |    |    |    |    |     |     |     |   |     |     |
|----|-----|---------------------|----|----|----|----|----|----|-----|-----|-----|---|-----|-----|
|    |     |                     | 4  | 6  | 9  | 1  | 3  | 9  | 56  | 667 | 55  | n | 71  | 74  |
|    |     |                     |    |    |    |    |    |    |     |     | 6   |   | 85  | 04  |
| 80 | MFA | Microfibrillar      | 5. | 6. | 8. | 5. | 4. | 3. | -5. | -2. | 5.7 | D | 0.0 | 0.6 |
| 76 | P5  | associated protein  | 93 | 83 | 52 | 79 | 48 | 41 | 769 | 528 | 69  | o | 14  | 63  |
|    |     | 5                   | 72 | 16 | 02 | 88 | 83 | 66 | 408 | 423 | 40  | w | 62  | 32  |
|    |     |                     | 5  | 4  | 6  | 9  | 8  | 1  | 168 | 333 | 81  | n | 16  | 74  |
|    |     |                     |    |    |    |    |    |    |     |     | 68  |   | 62  | 04  |
| 91 | DEP | DEP domain          | 6. | 6. | 6. | 5. | 5. | 6. | -1. | -0. | 1.7 | D | 0.0 | 0.6 |
| 61 | DC7 | containing 7        | 47 | 38 | 65 | 18 | 48 | 44 | 741 | 800 | 41  | o | 42  | 63  |
| 4  |     |                     | 36 | 53 | 79 | 59 | 94 | 06 | 459 | 296 | 45  | w | 29  | 32  |
|    |     |                     | 7  | 2  | 1  | 3  | 6  | 2  | 192 | 667 | 91  | n | 56  | 74  |
|    |     |                     |    |    |    |    |    |    |     |     | 92  |   | 81  | 04  |
| 94 | ARH | Rac/Cdc42 guanine   | 6. | 7. | 6. | 8. | 7. | 7. | 1.7 | 0.8 | 1.7 | U | 0.0 | 0.6 |
| 59 | GEF | nucleotide          | 33 | 07 | 87 | 13 | 50 | 05 | 453 | 035 | 45  | p | 41  | 63  |
|    | 6   | exchange factor 6   | 00 | 41 | 85 | 30 | 96 | 05 | 422 | 1   | 34  |   | 13  | 32  |
|    |     |                     | 8  | 6  | 6  | 9  | 6  | 8  | 9   |     | 22  |   | 25  | 74  |
|    |     |                     |    |    |    |    |    |    |     |     | 9   |   | 95  | 04  |
| 64 | ADG | Adhesion G          | 5. | 5. | 6. | 7. | 8. | 6. | 2.8 | 1.4 | 2.8 | U | 0.0 | 0.6 |
| 12 | RL4 | protein-coupled     | 50 | 72 | 11 | 69 | 10 | 00 | 064 | 887 | 06  | p | 24  | 63  |
| 3  |     | receptor L4         | 21 | 43 | 12 | 33 | 64 | 41 | 765 | 6   | 47  |   | 71  | 32  |
|    |     |                     | 1  | 5  | 8  | 5  | 8  | 9  | 41  |     | 65  |   | 88  | 74  |
|    |     |                     |    |    |    |    |    |    |     |     | 41  |   | 75  | 04  |
| 10 | CAP | CAP, adenylate      | 5. | 6. | 5. | 7. | 6. | 6. | 2.2 | 1.1 | 2.2 | U | 0.0 | 0.6 |
| 48 | 2   | cyclase-associated  | 30 | 41 | 39 | 79 | 44 | 32 | 278 | 556 | 27  | p | 42  | 63  |
| 6  |     | protein, 2 (yeast)  | 19 | 07 | 28 | 81 | 48 | 94 | 261 | 366 | 82  |   | 51  | 32  |
|    |     |                     | 8  | 2  | 1  | 9  | 3  |    | 67  | 67  | 61  |   | 47  | 74  |
|    |     |                     |    |    |    |    |    |    |     |     | 67  |   | 71  | 04  |
| 15 | CYP | Cytochrome P450,    | 6. | 5. | 5. | 5. | 4. | 4. | -1. | -0. | 1.8 | D | 0.0 | 0.6 |
| 64 | 2D7 | family 2, subfamily | 31 | 89 | 46 | 44 | 70 | 76 | 896 | 923 | 96  | o | 15  | 63  |



|               |           |                                                     |                      |                      |                      |                      |                      |                      |                          |                          |                             |                  |                             |                             |
|---------------|-----------|-----------------------------------------------------|----------------------|----------------------|----------------------|----------------------|----------------------|----------------------|--------------------------|--------------------------|-----------------------------|------------------|-----------------------------|-----------------------------|
|               |           | D, polypeptide 7<br>(gene/pseudogene)               | 07<br>3              |                      | 89<br>6              | 01<br>5              | 02<br>8              | 00<br>7              | 137<br>168               | 063<br>333               | 13<br>71<br>68              | w<br>n           | 23<br>86<br>05              | 32<br>74<br>04              |
| 84<br>94<br>1 | HSB<br>2D | Hematopoietic<br>SH2 domain<br>containing           | 5.<br>04<br>87<br>7  | 5.<br>06<br>93<br>6  | 5.<br>07<br>80<br>4  | 4.<br>18<br>51<br>2  | 4.<br>30<br>65<br>5  | 4.<br>86<br>37<br>1  | -1.<br>530<br>068<br>95  | -0.<br>613<br>596<br>667 | 1.5<br>30<br>06<br>89<br>5  | D<br>o<br>w<br>n | 0.0<br>18<br>21<br>43<br>91 | 0.6<br>63<br>32<br>74<br>04 |
| 10<br>35<br>2 | WAR<br>S2 | Tryptophanyl trna<br>synthetase 2,<br>mitochondrial | 6.<br>15<br>37<br>2  | 6.<br>00<br>35<br>4  | 5.<br>84<br>74<br>4  | 6.<br>87<br>82<br>1  | 6.<br>68<br>84<br>4  | 6.<br>63<br>27<br>5  | 1.6<br>604<br>412<br>37  | 0.7<br>315<br>666<br>67  | 1.6<br>60<br>44<br>12<br>37 | U<br>p           | 0.0<br>02<br>93<br>02<br>71 | 0.6<br>63<br>32<br>74<br>04 |
| 23<br>08<br>6 | EXP<br>H5 | Exophilin 5                                         | 4.<br>06<br>47<br>7  | 4.<br>00<br>58<br>9  | 4.<br>15<br>45<br>7  | 3.<br>25<br>91<br>2  | 3.<br>64<br>46<br>1  | 3.<br>48<br>03<br>7  | -1.<br>530<br>189<br>151 | -0.<br>613<br>71         | 1.5<br>30<br>18<br>91<br>51 | D<br>o<br>w<br>n | 0.0<br>02<br>68<br>41<br>8  | 0.6<br>63<br>32<br>74<br>04 |
| 10<br>13<br>0 | PDIA<br>6 | Protein disulfide<br>isomerase family A<br>member 6 | 8.<br>29<br>3        | 8.<br>02<br>49<br>8  | 8.<br>57<br>19       | 8.<br>77<br>20<br>5  | 9.<br>09<br>59<br>1  | 9.<br>01<br>01<br>9  | 1.5<br>831<br>046<br>94  | 0.6<br>627<br>566<br>67  | 1.5<br>83<br>10<br>46<br>94 | U<br>p           | 0.0<br>11<br>35<br>09<br>5  | 0.6<br>63<br>32<br>74<br>04 |
| 63<br>82      | SDC<br>1  | Syndecan 1                                          | 13<br>.1<br>57<br>75 | 13<br>.0<br>76<br>11 | 13<br>.0<br>02<br>65 | 11<br>.8<br>07<br>37 | 12<br>.5<br>27<br>39 | 12<br>.8<br>74<br>07 | -1.<br>597<br>585<br>71  | -0.<br>675<br>893<br>333 | 1.5<br>97<br>58<br>57<br>1  | D<br>o<br>w<br>n | 0.0<br>40<br>24<br>89<br>28 | 0.6<br>63<br>32<br>74<br>04 |
| 34            | IGH       | Immunoglobulin                                      | 8.                   | 9.                   | 8.                   | 9.                   | 11                   | 11                   | 5.1                      | 2.3                      | 5.1                         | U                | 0.0                         | 0.6                         |

|               |            |                                   |                     |                     |                     |                      |                      |                     |                          |                             |                             |                  |                             |                             |
|---------------|------------|-----------------------------------|---------------------|---------------------|---------------------|----------------------|----------------------|---------------------|--------------------------|-----------------------------|-----------------------------|------------------|-----------------------------|-----------------------------|
| 93            | A1         | heavy constant $\alpha$ 1         | 49<br>73<br>6       | 04<br>95<br>4       | 21<br>78<br>7       | 41<br>80<br>9        | .8<br>59<br>83       | .5<br>63<br>57      | 298<br>145<br>33         | 589<br>066<br>67            | 29<br>81<br>45<br>33        | p                | 06<br>85<br>66<br>94        | 63<br>32<br>74<br>04        |
| 60<br>91      | ROB<br>O1  | Roundabout<br>guidance receptor 1 | 5.<br>60<br>21<br>8 | 6.<br>54<br>32<br>5 | 6.<br>09<br>78<br>1 | 7.<br>78<br>44<br>5  | 7.<br>71<br>99<br>7  | 6.<br>48<br>41<br>7 | 2.3<br>758<br>602<br>86  | 1.2<br>484<br>5<br>86       | 2.3<br>75<br>86<br>02<br>86 | U<br>p           | 0.0<br>17<br>60<br>29<br>36 | 0.6<br>63<br>32<br>74<br>04 |
| 23<br>70<br>5 | CAD<br>M1  | Cell adhesion<br>molecule 1       | 4.<br>92<br>32<br>7 | 5.<br>86<br>66<br>2 | 5.<br>54<br>84<br>3 | 6.<br>33<br>49<br>1  | 6.<br>75<br>86<br>2  | 5.<br>84<br>54<br>3 | 1.8<br>237<br>146<br>32  | 0.8<br>668<br>8<br>32       | 1.8<br>23<br>71<br>46<br>32 | U<br>p           | 0.0<br>30<br>20<br>31<br>36 | 0.6<br>63<br>32<br>74<br>04 |
| 54<br>85<br>8 | PGP<br>EP1 | Pyroglutamyl-pepti<br>dase I      | 7.<br>68<br>94<br>7 | 7.<br>66<br>16<br>7 | 7.<br>29<br>73<br>8 | 6.<br>42<br>24<br>5  | 6.<br>92<br>24<br>9  | 7.<br>10<br>63<br>3 | -1.<br>661<br>419<br>816 | -0.<br>732<br>416<br>667    | 1.6<br>61<br>41<br>98<br>16 | D<br>o<br>w<br>n | 0.0<br>14<br>82<br>36<br>16 | 0.6<br>63<br>32<br>74<br>04 |
| 23<br>21      | FLT1       | Fms-related<br>tyrosine kinase 1  | 3.<br>60<br>41<br>9 | 3.<br>78<br>17<br>5 | 4.<br>51<br>07<br>6 | 6.<br>44<br>79<br>9  | 7.<br>10<br>85<br>5  | 4.<br>78<br>02<br>2 | 4.4<br>280<br>965<br>12  | 2.1<br>466<br>866<br>67     | 4.4<br>28<br>09<br>65<br>12 | U<br>p           | 0.0<br>07<br>49<br>48<br>43 | 0.6<br>63<br>32<br>74<br>04 |
| 92<br>8       | CD9        | CD9 molecule                      | 6.<br>96<br>65<br>1 | 8.<br>31<br>55<br>6 | 8.<br>07<br>87<br>7 | 10<br>.5<br>30<br>18 | 10<br>.5<br>03<br>38 | 8.<br>90<br>82<br>6 | 4.5<br>746<br>456<br>59  | 2.1<br>936<br>6<br>56<br>59 | 4.5<br>74<br>64<br>56<br>59 | U<br>p           | 0.0<br>04<br>33<br>49<br>93 | 0.6<br>63<br>32<br>74<br>04 |

|                |                 |                                                                          |                      |                      |                      |                      |                      |                     |                          |                              |                             |                  |                             |                             |
|----------------|-----------------|--------------------------------------------------------------------------|----------------------|----------------------|----------------------|----------------------|----------------------|---------------------|--------------------------|------------------------------|-----------------------------|------------------|-----------------------------|-----------------------------|
| 22<br>01<br>08 | FAM<br>124A     | Family with<br>sequence similarity<br>124 member A                       | 2.<br>91<br>96<br>5  | 3.<br>78<br>17<br>6  | 3.<br>29<br>24<br>1  | 4.<br>47<br>17<br>8  | 3.<br>83<br>62<br>2  | 3.<br>84<br>73<br>6 | 1.6<br>477<br>682<br>32  | 0.7<br>205<br>133<br>33      | 1.6<br>47<br>76<br>82<br>32 | U<br>p<br>n      | 0.0<br>29<br>99<br>93<br>4  | 0.6<br>63<br>32<br>74<br>04 |
| 89<br>12       | CAC<br>NA1<br>H | Calcium channel,<br>voltage-dependent,<br>T type, $\alpha$ 1H<br>subunit | 8.<br>78<br>2        | 8.<br>77<br>87<br>9  | 8.<br>98<br>90<br>1  | 8.<br>00<br>48<br>4  | 7.<br>80<br>68<br>8  | 8.<br>62<br>16<br>7 | -1.<br>630<br>675<br>819 | -0.<br>705<br>47<br>58       | 1.6<br>30<br>67<br>58<br>19 | D<br>o<br>w<br>n | 0.0<br>20<br>06<br>77<br>29 | 0.6<br>63<br>32<br>74<br>04 |
| 81<br>60<br>6  | LBH             | Limb bud and heart<br>development                                        | 3.<br>89<br>79<br>3  | 4.<br>88<br>89<br>4  | 4.<br>23<br>29<br>4  | 7.<br>64<br>34<br>1  | 5.<br>19<br>97<br>2  | 5.<br>78<br>66<br>2 | 3.6<br>552<br>751<br>28  | 1.8<br>699<br>8<br>28        | 3.6<br>55<br>27<br>51<br>28 | U<br>p<br>n      | 0.0<br>18<br>46<br>31<br>96 | 0.6<br>63<br>32<br>74<br>04 |
| 43<br>11       | MM<br>E         | Membrane<br>metallo-endopeptid<br>ase                                    | 10<br>.4<br>07<br>24 | 9.<br>47<br>82<br>5  | 10<br>.0<br>27<br>18 | 8.<br>62<br>31<br>7  | 8.<br>41<br>97<br>6  | 9.<br>60<br>73<br>5 | -2.<br>125<br>000<br>725 | -1.<br>087<br>463<br>333     | 2.1<br>25<br>00<br>07<br>25 | D<br>o<br>w<br>n | 0.0<br>21<br>38<br>00<br>55 | 0.6<br>63<br>32<br>74<br>04 |
| 64<br>77<br>1  | C6orf<br>106    | Chromosome 6<br>open reading frame<br>106                                | 8.<br>85<br>45<br>8  | 8.<br>68<br>18<br>7  | 8.<br>39<br>79<br>1  | 8.<br>01<br>34<br>5  | 7.<br>80<br>28<br>7  | 8.<br>24<br>86<br>8 | -1.<br>540<br>202<br>454 | -0.<br>623<br>12<br>24<br>54 | 1.5<br>40<br>20<br>24<br>54 | D<br>o<br>w<br>n | 0.0<br>15<br>18<br>42<br>31 | 0.6<br>63<br>32<br>74<br>04 |
| 23<br>65<br>4  | PLX<br>NB2      | Plexin B2                                                                | 11<br>.8<br>46<br>77 | 11<br>.8<br>17<br>03 | 11<br>.4<br>83<br>77 | 10<br>.2<br>52<br>27 | 11<br>.3<br>59<br>18 | 11<br>.0<br>30<br>6 | -1.<br>784<br>071<br>374 | -0.<br>835<br>173<br>333     | 1.7<br>84<br>07<br>13       | D<br>o<br>w<br>n | 0.0<br>24<br>36<br>68       | 0.6<br>63<br>32<br>74       |

|               |           |                                                 |                     |                     |                     |                     |                     |                     |                          |                               |                             |                  |                             |                             |
|---------------|-----------|-------------------------------------------------|---------------------|---------------------|---------------------|---------------------|---------------------|---------------------|--------------------------|-------------------------------|-----------------------------|------------------|-----------------------------|-----------------------------|
|               |           |                                                 |                     |                     |                     |                     |                     |                     |                          |                               | 74                          |                  |                             | 04                          |
| 69<br>35      | ZEB<br>1  | Zinc finger E-box<br>binding homeobox<br>1      | 6.<br>22<br>02<br>9 | 7.<br>82<br>71<br>9 | 7.<br>04<br>17<br>1 | 9.<br>34<br>31<br>3 | 8.<br>59<br>37<br>1 | 7.<br>69<br>09<br>6 | 2.8<br>537<br>718<br>49  | 1.5<br>128<br>7<br>18<br>49   | 2.8<br>53<br>77<br>18<br>49 | U<br>p           | 0.0<br>22<br>86<br>76<br>97 | 0.6<br>63<br>32<br>74<br>04 |
| 43<br>45      | CD2<br>00 | CD200 molecule                                  | 4.<br>92<br>42<br>3 | 5.<br>44<br>20<br>5 | 4.<br>43<br>25<br>4 | 7.<br>08<br>70<br>8 | 6.<br>13<br>64<br>4 | 5.<br>61<br>93<br>4 | 2.5<br>455<br>898<br>71  | 1.3<br>48<br>58<br>98<br>71   | 2.5<br>45<br>58<br>98<br>71 | U<br>p           | 0.0<br>14<br>05<br>91<br>71 | 0.6<br>63<br>32<br>74<br>04 |
| 26<br>13<br>6 | TES       | Testin LIM domain<br>protein                    | 9.<br>16<br>25<br>8 | 9.<br>13<br>95<br>6 | 8.<br>40<br>77<br>9 | 7.<br>65<br>40<br>1 | 8.<br>49<br>45<br>1 | 8.<br>33<br>15<br>4 | -1.<br>673<br>988<br>945 | -0.<br>743<br>29<br>89<br>45  | 1.6<br>73<br>98<br>89<br>45 | D<br>o<br>w<br>n | 0.0<br>43<br>33<br>63<br>79 | 0.6<br>63<br>32<br>74<br>04 |
| 26<br>90      | GHR       | Growth hormone<br>receptor                      | 3.<br>34<br>56<br>4 | 5.<br>19<br>53<br>9 | 4.<br>97<br>94<br>2 | 5.<br>81<br>40<br>9 | 6.<br>23<br>19<br>9 | 5.<br>36<br>24<br>3 | 2.4<br>554<br>770<br>41  | 1.2<br>960<br>033<br>33<br>41 | 2.4<br>55<br>47<br>70<br>41 | U<br>p           | 0.0<br>35<br>09<br>21<br>43 | 0.6<br>63<br>32<br>74<br>04 |
| 70<br>74      | TIA<br>M1 | T-cell lymphoma<br>invasion and<br>metastasis 1 | 5.<br>55<br>75<br>8 | 6.<br>79<br>62<br>1 | 6.<br>38<br>30<br>4 | 7.<br>62<br>71<br>5 | 7.<br>89<br>59<br>2 | 6.<br>65<br>88<br>9 | 2.2<br>166<br>433<br>53  | 1.1<br>483<br>766<br>67<br>53 | 2.2<br>16<br>64<br>33<br>53 | U<br>p           | 0.0<br>28<br>78<br>39<br>66 | 0.6<br>63<br>32<br>74<br>04 |
| 79<br>81<br>9 | WDR<br>78 | WD repeat domain<br>78                          | 5.<br>42<br>74      | 5.<br>02<br>30      | 5.<br>56<br>12      | 4.<br>34<br>12      | 4.<br>32<br>85      | 4.<br>64<br>00      | -1.<br>866<br>893        | -0.<br>900<br>64              | 1.8<br>66<br>89             | D<br>o<br>w      | 0.0<br>02<br>18             | 0.6<br>63<br>32             |

|    |      |                           |    |    |    |    |    |    |     |     |     |   |     |     |
|----|------|---------------------------|----|----|----|----|----|----|-----|-----|-----|---|-----|-----|
|    |      |                           | 7  | 5  | 5  | 4  | 3  | 8  | 98  |     | 39  | n | 79  | 74  |
|    |      |                           |    |    |    |    |    |    |     |     | 8   |   | 06  | 04  |
| 79 | BEN  | BEN domain                | 7. | 7. | 6. | 6. | 5. | 6. | -1. | -0. | 1.9 | D | 0.0 | 0.6 |
| 65 | D5   | containing 5              | 73 | 21 | 98 | 09 | 90 | 98 | 979 | 985 | 79  | o | 21  | 63  |
| 6  |      |                           | 97 | 27 | 78 | 14 | 62 | 65 | 802 | 356 | 80  | w | 16  | 32  |
|    |      |                           | 8  | 3  | 5  | 9  | 1  | 9  | 704 | 667 | 27  | n | 60  | 74  |
|    |      |                           |    |    |    |    |    |    |     |     | 04  |   | 56  | 04  |
| 13 | GAL  | Galactose                 | 8. | 8. | 8. | 7. | 7. | 8. | -1. | -0. | 1.6 | D | 0.0 | 0.6 |
| 05 | M    | mutarotase (aldose        | 63 | 47 | 25 | 46 | 78 | 05 | 612 | 689 | 12  | o | 11  | 63  |
| 89 |      | 1-epimerase)              | 27 | 31 | 69 | 27 | 00 | 18 | 649 | 433 | 64  | w | 95  | 32  |
|    |      |                           | 5  | 7  | 8  |    | 6  | 4  | 972 | 333 | 99  | n | 71  | 74  |
|    |      |                           |    |    |    |    |    |    |     |     | 72  |   | 98  | 04  |
| 29 | ABR  | Active                    | 10 | 10 | 10 | 10 | 10 | 10 | -1. | -0. | 1.5 | D | 0.0 | 0.6 |
|    |      | BCR-related               | .9 | .7 | .7 | .2 | .0 | .2 | 563 | 644 | 63  | o | 03  | 63  |
|    |      |                           | 85 | 81 | 88 | 81 | 70 | 69 | 732 | 993 | 73  | w | 39  | 32  |
|    |      |                           | 44 | 65 | 83 | 63 | 12 | 19 | 06  | 333 | 20  | n | 08  | 74  |
|    |      |                           |    |    |    |    |    |    |     |     | 6   |   | 61  | 04  |
| 56 | PCD  | Protocadherin $\alpha$ 10 | 7. | 7. | 6. | 6. | 6. | 6. | -1. | -0. | 1.5 | D | 0.0 | 0.6 |
| 13 | HA1  |                           | 44 | 73 | 91 | 53 | 83 | 80 | 557 | 639 | 57  | o | 31  | 63  |
| 9  | 0    |                           | 20 | 45 | 29 | 69 | 18 | 31 | 526 | 256 | 52  | w | 81  | 32  |
|    |      |                           | 9  | 2  | 9  |    | 2  | 1  | 454 | 667 | 64  | n | 64  | 74  |
|    |      |                           |    |    |    |    |    |    |     |     | 54  |   | 86  | 04  |
| 86 | RUN  | Runt-related              | 4. | 5. | 5. | 6. | 6. | 5. | 2.0 | 1.0 | 2.0 | U | 0.0 | 0.6 |
| 0  | X2   | transcription factor      | 69 | 17 | 00 | 11 | 32 | 50 | 272 | 194 | 27  | p | 04  | 63  |
|    |      | 2                         | 86 | 14 | 68 | 03 | 38 | 11 | 022 | 9   | 20  |   | 90  | 32  |
|    |      |                           | 9  | 6  | 2  | 9  | 9  | 6  | 07  |     | 22  |   | 89  | 74  |
|    |      |                           |    |    |    |    |    |    |     |     | 07  |   | 48  | 04  |
| 79 | HAN  | HAND2 antisense           | 3. | 5. | 4. | 7. | 5. | 5. | 3.3 | 1.7 | 3.3 | U | 0.0 | 0.6 |
| 80 | D2-A | RNA 1 (head to            | 90 | 59 | 37 | 51 | 88 | 66 | 102 | 269 | 10  | p | 23  | 63  |

|                |             |                                                                   |                     |                     |                     |                     |                     |                     |                          |                          |                             |                  |                             |                             |
|----------------|-------------|-------------------------------------------------------------------|---------------------|---------------------|---------------------|---------------------|---------------------|---------------------|--------------------------|--------------------------|-----------------------------|------------------|-----------------------------|-----------------------------|
| 4              | S1          | head)                                                             | 32<br>7             | 90<br>7             | 77                  | 54<br>8             | 19<br>5             | 34<br>6             | 725<br>37                | 5                        | 27<br>25<br>37              |                  | 44<br>94<br>48              | 32<br>74<br>04              |
| 11<br>49<br>71 | PTP<br>MT1  | Protein tyrosine<br>phosphatase,<br>mitochondrial 1               | 6.<br>40<br>84<br>7 | 6.<br>49<br>62<br>7 | 6.<br>06<br>28<br>1 | 5.<br>52<br>24<br>5 | 5.<br>77<br>17      | 5.<br>83<br>33<br>9 | -1.<br>529<br>793<br>228 | -0.<br>613<br>336<br>667 | 1.5<br>29<br>79<br>32<br>28 | D<br>o<br>w<br>n | 0.0<br>12<br>81<br>83<br>57 | 0.6<br>63<br>32<br>74<br>04 |
| 13<br>16       | KLF<br>6    | Kruppel-like factor<br>6                                          | 5.<br>15<br>95<br>1 | 4.<br>80<br>28<br>5 | 5.<br>68<br>98<br>9 | 6.<br>96<br>70<br>9 | 6.<br>95<br>26<br>4 | 5.<br>89<br>85<br>5 | 2.6<br>183<br>839<br>55  | 1.3<br>886<br>766<br>67  | 2.6<br>18<br>38<br>39<br>55 | U<br>p           | 0.0<br>06<br>04<br>92<br>84 | 0.6<br>63<br>32<br>74<br>04 |
| 88<br>87       | TAX<br>1BP1 | Tax1 (human T-cell<br>leukemia virus type<br>I) binding protein 1 | 7.<br>63<br>62<br>7 | 6.<br>96<br>58<br>1 | 7.<br>18<br>53<br>7 | 5.<br>92<br>75<br>3 | 5.<br>79<br>01<br>2 | 7.<br>21<br>00<br>3 | -1.<br>936<br>238<br>495 | -0.<br>953<br>256<br>667 | 1.9<br>36<br>23<br>84<br>95 | D<br>o<br>w<br>n | 0.0<br>47<br>59<br>85<br>16 | 0.6<br>63<br>32<br>74<br>04 |
| 39<br>0        | RND<br>3    | Rho family gtpase<br>3                                            | 6.<br>58<br>15<br>9 | 6.<br>99<br>54<br>8 | 6.<br>29<br>54<br>7 | 9.<br>03<br>55<br>7 | 9.<br>28<br>83      | 7.<br>72<br>75<br>8 | 4.1<br>688<br>130<br>23  | 2.0<br>596<br>366<br>67  | 4.1<br>68<br>81<br>30<br>23 | U<br>p           | 0.0<br>01<br>72<br>26<br>7  | 0.6<br>63<br>32<br>74<br>04 |
| 79<br>84<br>4  | ZDH<br>HC11 | Zinc finger,<br>DHHC-type<br>containing 11                        | 8.<br>42<br>05<br>4 | 7.<br>32<br>92<br>2 | 7.<br>20<br>32<br>4 | 4.<br>87<br>69<br>1 | 5.<br>43<br>64<br>7 | 7.<br>09<br>46<br>1 | -3.<br>600<br>847<br>913 | -1.<br>848<br>336<br>667 | 3.6<br>00<br>84<br>79<br>13 | D<br>o<br>w<br>n | 0.0<br>17<br>48<br>68<br>04 | 0.6<br>63<br>32<br>74<br>04 |
| 26             | CHI         | Cysteine rich                                                     | 5.                  | 5.                  | 5.                  | 6.                  | 6.                  | 6.                  | 1.5                      | 0.6                      | 1.5                         | U                | 0.0                         | 0.6                         |

|                |             |                                                      |                     |                     |                     |                     |                     |                     |                          |                         |                             |                  |                             |                             |
|----------------|-------------|------------------------------------------------------|---------------------|---------------------|---------------------|---------------------|---------------------|---------------------|--------------------------|-------------------------|-----------------------------|------------------|-----------------------------|-----------------------------|
| 51<br>1        | C2          | hydrophobic<br>domain 2                              | 67<br>40<br>9       | 92<br>85<br>4       | 99<br>94            | 90<br>03<br>1       | 37<br>64<br>5       | 29<br>17<br>1       | 751<br>399<br>32         | 554<br>8                | 75<br>13<br>99<br>32        | p                | 17<br>92<br>81<br>97        | 63<br>32<br>74<br>04        |
| 53<br>32       | PLC<br>B4   | Phospholipase C $\beta$<br>4                         | 2.<br>78<br>43      | 3.<br>50<br>42<br>3 | 3.<br>31<br>22<br>7 | 7.<br>14<br>51      | 5.<br>04<br>45<br>9 | 3.<br>85<br>6       | 4.4<br>330<br>408<br>8   | 2.1<br>482<br>966<br>67 | 4.4<br>33<br>04<br>08<br>8  | U<br>p           | 0.0<br>24<br>49<br>44<br>5  | 0.6<br>63<br>32<br>74<br>04 |
| 20<br>74       | ERC<br>C6   | Excision repair<br>cross-complementa<br>tion group 6 | 4.<br>84<br>01      | 4.<br>86<br>96<br>4 | 4.<br>97<br>31<br>3 | 4.<br>21<br>94<br>8 | 4.<br>45<br>01<br>4 | 4.<br>22<br>07<br>8 | -1.<br>513<br>081<br>816 | -0.<br>597<br>49        | 1.5<br>13<br>08<br>18<br>16 | D<br>o<br>w<br>n | 0.0<br>03<br>24<br>27<br>08 | 0.6<br>63<br>32<br>74<br>04 |
| 11<br>47<br>57 | CYG<br>B    | Cytoglobin                                           | 7.<br>00<br>28<br>1 | 7.<br>60<br>91<br>2 | 7.<br>44<br>69<br>2 | 7.<br>99<br>21<br>6 | 8.<br>20<br>17<br>1 | 7.<br>78<br>85<br>6 | 1.5<br>596<br>186<br>73  | 0.6<br>411<br>933<br>33 | 1.5<br>59<br>61<br>86<br>73 | U<br>p           | 0.0<br>19<br>96<br>94<br>63 | 0.6<br>63<br>32<br>74<br>04 |
| 10<br>09       | CDH<br>11   | Cadherin 11, type<br>2, OB-cadherin<br>(osteoblast)  | 3.<br>71<br>82<br>7 | 6.<br>01<br>97<br>8 | 4.<br>83<br>30<br>4 | 8.<br>97<br>74<br>7 | 6.<br>40<br>29<br>3 | 7.<br>14<br>81      | 6.2<br>874<br>281<br>13  | 2.6<br>524<br>7         | 6.2<br>87<br>42<br>81<br>13 | U<br>p           | 0.0<br>11<br>24<br>59<br>42 | 0.6<br>63<br>32<br>74<br>04 |
| 80<br>72<br>3  | SLC3<br>5G2 | Solute carrier<br>family 35 member<br>G2             | 3.<br>64<br>69<br>4 | 3.<br>64<br>31<br>4 | 3.<br>94<br>73<br>7 | 4.<br>85<br>66      | 4.<br>71<br>45<br>2 | 4.<br>14<br>84<br>1 | 1.7<br>744<br>353<br>35  | 0.8<br>273<br>6         | 1.7<br>74<br>43<br>53<br>35 | U<br>p           | 0.0<br>05<br>74<br>25<br>43 | 0.6<br>63<br>32<br>74<br>04 |

|    |     |                      |    |    |    |    |    |    |     |     |     |   |     |     |
|----|-----|----------------------|----|----|----|----|----|----|-----|-----|-----|---|-----|-----|
| 10 | MTH | Methylenetetrahydr   | 5. | 5. | 6. | 7. | 7. | 5. | 2.7 | 1.4 | 2.7 | U | 0.0 | 0.6 |
| 79 | FD2 | ofolate              | 18 | 48 | 16 | 88 | 51 | 82 | 644 | 670 | 64  | p | 30  | 63  |
| 7  |     | dehydrogenase        | 08 | 03 | 12 | 02 | 40 | 92 | 963 | 166 | 49  |   | 50  | 32  |
|    |     | (NADP+               | 5  |    | 9  | 3  | 4  | 2  | 5   | 67  | 63  |   | 67  | 74  |
|    |     | dependent) 2,        |    |    |    |    |    |    |     |     | 5   |   | 88  | 04  |
|    |     | methenyltetrahydro   |    |    |    |    |    |    |     |     |     |   |     |     |
|    |     | folate               |    |    |    |    |    |    |     |     |     |   |     |     |
|    |     | cyclohydrolase       |    |    |    |    |    |    |     |     |     |   |     |     |
| 63 | CXC | Chemokine            | 5. | 7. | 6. | 7. | 7. | 7. | 1.9 | 0.9 | 1.9 | U | 0.0 | 0.6 |
| 87 | L12 | (C-X-C motif)        | 87 | 00 | 98 | 78 | 92 | 14 | 953 | 966 | 95  | p | 28  | 63  |
|    |     | ligand 12            | 78 | 79 | 59 | 88 | 57 | 71 | 981 | 766 | 39  |   | 47  | 32  |
|    |     |                      | 7  | 1  | 5  | 5  | 2  | 9  | 84  | 67  | 81  |   | 86  | 74  |
|    |     |                      |    |    |    |    |    |    |     |     | 84  |   | 6   | 04  |
| 10 | CRT | Cartilage            | 7. | 7. | 7. | 8. | 8. | 7. | 1.7 | 0.7 | 1.7 | U | 0.0 | 0.6 |
| 49 | AP  | associated protein   | 50 | 13 | 80 | 81 | 08 | 95 | 396 | 987 | 39  | p | 26  | 63  |
| 1  |     |                      | 98 | 67 | 98 | 50 | 59 | 17 | 454 | 933 | 64  |   | 51  | 32  |
|    |     |                      | 1  | 8  | 1  | 8  | 1  | 9  | 83  | 33  | 54  |   | 42  | 74  |
|    |     |                      |    |    |    |    |    |    |     |     | 83  |   | 64  | 04  |
| 72 | TWI | Twist family bhlh    | 4. | 4. | 4. | 5. | 4. | 4. | 1.7 | 0.8 | 1.7 | U | 0.0 | 0.6 |
| 91 | ST1 | transcription factor | 35 | 32 | 47 | 89 | 96 | 75 | 691 | 230 | 69  | p | 26  | 63  |
|    |     | 1                    | 50 | 19 | 21 | 84 | 57 | 40 | 258 | 366 | 12  |   | 87  | 32  |
|    |     |                      | 3  | 3  | 1  | 2  | 1  | 5  | 33  | 67  | 58  |   | 47  | 74  |
|    |     |                      |    |    |    |    |    |    |     |     | 33  |   | 67  | 04  |
| 89 | CCN | Cyclin D2            | 7. | 8. | 8. | 9. | 9. | 8. | 2.1 | 1.0 | 2.1 | U | 0.0 | 0.6 |
| 4  | D2  |                      | 61 | 73 | 22 | 96 | 27 | 60 | 316 | 919 | 31  | p | 31  | 63  |
|    |     |                      | 36 | 70 | 08 | 34 | 99 | 40 | 639 | 8   | 66  |   | 56  | 32  |
|    |     |                      | 2  | 2  | 8  | 5  | 2  | 9  | 21  |     | 39  |   | 07  | 74  |
|    |     |                      |    |    |    |    |    |    |     |     | 21  |   | 36  | 04  |
| 41 | ARS | Arylsulfatase D      | 10 | 9. | 10 | 9. | 9. | 9. | -1. | -0. | 1.6 | D | 0.0 | 0.6 |



|    |      |                      |    |    |    |    |    |    |     |     |     |   |     |     |
|----|------|----------------------|----|----|----|----|----|----|-----|-----|-----|---|-----|-----|
| 4  | D    |                      | .3 | 56 | .3 | 11 | 13 | 80 | 681 | 750 | 81  | o | 39  | 63  |
|    |      |                      | 51 | 82 | 83 | 19 | 16 | 90 | 796 | 003 | 79  | w | 26  | 32  |
|    |      |                      | 18 | 5  | 12 | 3  |    | 1  | 716 | 333 | 67  | n | 62  | 74  |
|    |      |                      |    |    |    |    |    |    |     |     | 16  |   | 34  | 04  |
| 25 | TNF  | TNF $\alpha$ induced | 4. | 4. | 4. | 5. | 4. | 5. | 1.7 | 0.7 | 1.7 | U | 0.0 | 0.6 |
| 81 | AIP8 | protein 8            | 20 | 71 | 64 | 90 | 88 | 10 | 113 | 750 | 11  | p | 32  | 63  |
| 6  |      |                      | 7  | 94 | 35 | 27 | 36 | 88 | 047 | 966 | 30  |   | 45  | 32  |
|    |      |                      |    | 1  | 8  | 9  | 6  | 3  | 12  | 67  | 47  |   | 94  | 74  |
|    |      |                      |    |    |    |    |    |    |     |     | 12  |   | 55  | 04  |
| 57 | PTG  | Prostaglandin E      | 3. | 3. | 4. | 5. | 5. | 4. | 2.1 | 1.0 | 2.1 | U | 0.0 | 0.6 |
| 32 | ER2  | receptor 2           | 80 | 79 | 11 | 15 | 20 | 61 | 193 | 836 | 19  | p | 00  | 63  |
|    |      |                      | 84 | 63 | 41 | 24 | 29 | 45 | 423 | 166 | 34  |   | 98  | 32  |
|    |      |                      | 7  | 6  | 5  | 2  | 1  |    | 69  | 67  | 23  |   | 31  | 74  |
|    |      |                      |    |    |    |    |    |    |     |     | 69  |   | 95  | 04  |
| 83 | AXI  | Axin 2               | 3. | 4. | 4. | 6. | 5. | 4. | 2.5 | 1.3 | 2.5 | U | 0.0 | 0.6 |
| 13 | N2   |                      | 63 | 36 | 23 | 04 | 60 | 66 | 639 | 583 | 63  | p | 08  | 63  |
|    |      |                      | 58 | 56 | 57 | 34 | 49 | 40 | 474 | 666 | 94  |   | 14  | 32  |
|    |      |                      | 9  | 1  | 7  | 1  | 1  | 5  | 03  | 67  | 74  |   | 51  | 74  |
|    |      |                      |    |    |    |    |    |    |     |     | 03  |   | 35  | 04  |
| 23 | SYN  | Spectrin repeat      | 4. | 5. | 5. | 7. | 6. | 5. | 2.2 | 1.1 | 2.2 | U | 0.0 | 0.6 |
| 34 | E1   | containing, nuclear  | 87 | 59 | 75 | 31 | 39 | 94 | 110 | 447 | 11  | p | 22  | 63  |
| 5  |      | envelope 1           | 77 | 26 | 78 | 88 | 65 | 70 | 423 | 266 | 04  |   | 28  | 32  |
|    |      |                      | 7  | 8  |    | 7  | 5  | 1  | 62  | 67  | 23  |   | 60  | 74  |
|    |      |                      |    |    |    |    |    |    |     |     | 62  |   | 52  | 04  |
| 15 | WBS  | Williams Beuren      | 5. | 6. | 5. | 5. | 5. | 5. | -1. | -0. | 1.7 | D | 0.0 | 0.6 |
| 53 | CR27 | syndrome             | 95 | 36 | 79 | 05 | 31 | 30 | 757 | 813 | 57  | o | 04  | 63  |
| 68 |      | chromosome           | 95 | 25 | 14 | 53 | 49 | 27 | 473 | 503 | 47  | w | 42  | 32  |
|    |      | region 27            | 6  | 8  | 1  | 5  | 1  | 8  | 984 | 333 | 39  | n | 20  | 74  |
|    |      |                      |    |    |    |    |    |    |     |     | 84  |   | 57  | 04  |

|                |             |                                                                     |                     |                     |                     |                     |                     |                     |                          |                          |                             |                  |                             |                             |
|----------------|-------------|---------------------------------------------------------------------|---------------------|---------------------|---------------------|---------------------|---------------------|---------------------|--------------------------|--------------------------|-----------------------------|------------------|-----------------------------|-----------------------------|
| 88<br>05       | TRI<br>M24  | Tripartite motif<br>containing 24                                   | 7.<br>46<br>77<br>7 | 7.<br>06<br>09<br>9 | 6.<br>89<br>88<br>9 | 6.<br>92<br>73<br>3 | 6.<br>30<br>79<br>5 | 6.<br>30<br>84<br>5 | -1.<br>545<br>410<br>387 | -0.<br>627<br>99<br>87   | 1.5<br>45<br>41<br>03       | D<br>o<br>w<br>n | 0.0<br>37<br>18<br>67<br>03 | 0.6<br>63<br>32<br>74<br>04 |
| 70<br>78       | TIM<br>P3   | TIMP<br>metallopeptidase<br>inhibitor 3                             | 4.<br>56<br>27<br>3 | 6.<br>12<br>34<br>7 | 6.<br>65<br>62<br>7 | 8.<br>03<br>41<br>9 | 8.<br>04<br>28<br>7 | 6.<br>68<br>14<br>4 | 3.4<br>951<br>797<br>85  | 1.8<br>053<br>666<br>67  | 3.4<br>95<br>17<br>97<br>85 | U<br>p           | 0.0<br>19<br>78<br>07<br>05 | 0.6<br>63<br>32<br>74<br>04 |
| 20<br>09<br>16 | RPL2<br>2L1 | Ribosomal protein<br>L22-like 1                                     | 8.<br>04<br>14<br>1 | 7.<br>81<br>73<br>8 | 8.<br>00<br>95<br>1 | 9.<br>29<br>32<br>1 | 9.<br>38<br>39<br>5 | 8.<br>25<br>16<br>8 | 2.0<br>281<br>766<br>78  | 1.0<br>201<br>833<br>33  | 2.0<br>28<br>17<br>66<br>78 | U<br>p           | 0.0<br>13<br>37<br>76<br>78 | 0.6<br>63<br>32<br>74<br>04 |
| 38<br>8        | RHO<br>B    | Ras homolog<br>family member B                                      | 6.<br>33<br>98<br>4 | 5.<br>84<br>53<br>9 | 5.<br>70<br>12<br>2 | 6.<br>88<br>53<br>9 | 7.<br>59<br>22<br>9 | 7.<br>04<br>22<br>6 | 2.3<br>152<br>425<br>37  | 1.2<br>111<br>633<br>33  | 2.3<br>15<br>24<br>25<br>37 | U<br>p           | 0.0<br>02<br>24<br>06<br>72 | 0.6<br>63<br>32<br>74<br>04 |
| 69<br>20       | TCE<br>A3   | Transcription<br>elongation factor A<br>(SII), 3                    | 8.<br>68<br>46<br>2 | 8.<br>40<br>81<br>1 | 8.<br>71<br>39<br>2 | 8.<br>20<br>82<br>2 | 7.<br>32<br>45<br>2 | 7.<br>93<br>55<br>1 | -1.<br>716<br>504<br>136 | -0.<br>779<br>473<br>333 | 1.7<br>16<br>50<br>41<br>36 | D<br>o<br>w<br>n | 0.0<br>17<br>11<br>91<br>67 | 0.6<br>63<br>32<br>74<br>04 |
| 15<br>40<br>91 | SLC2<br>A12 | Solute carrier<br>family 2<br>(facilitated glucose<br>transporter), | 6.<br>24<br>55<br>5 | 5.<br>99<br>24<br>8 | 6.<br>46<br>90<br>8 | 4.<br>61<br>76<br>1 | 5.<br>31<br>41<br>6 | 6.<br>12<br>87<br>3 | -1.<br>843<br>188<br>133 | -0.<br>882<br>203<br>333 | 1.8<br>43<br>18<br>81       | D<br>o<br>w<br>n | 0.0<br>49<br>41<br>67       | 0.6<br>63<br>32<br>74       |

|    |       |                    |    |    |    |    |    |    |     |     |     |   |     |     |
|----|-------|--------------------|----|----|----|----|----|----|-----|-----|-----|---|-----|-----|
|    |       | member 12          |    |    |    |    |    |    |     |     | 33  |   | 1   | 04  |
| 81 | CAB   | Calcium binding    | 4. | 5. | 5. | 6. | 6. | 5. | 2.0 | 1.0 | 2.0 | U | 0.0 | 0.6 |
| 61 | 39L   | protein 39 like    | 89 | 46 | 20 | 50 | 49 | 62 | 232 | 167 | 23  | p | 09  | 63  |
| 7  |       |                    | 21 | 89 | 92 | 33 | 25 | 44 | 903 | 033 | 29  |   | 53  | 32  |
|    |       |                    | 2  | 8  | 4  | 8  | 9  | 8  | 03  | 33  | 03  |   | 74  | 74  |
|    |       |                    |    |    |    |    |    |    |     |     | 03  |   | 91  | 04  |
| 21 | FAA   | Fatty acid amide   | 8. | 8. | 7. | 6. | 7. | 7. | -1. | -0. | 1.7 | D | 0.0 | 0.6 |
| 66 | H     | hydrolase          | 20 | 13 | 72 | 70 | 33 | 58 | 759 | 815 | 59  | o | 18  | 63  |
|    |       |                    | 85 | 13 | 77 | 29 | 84 | 02 | 631 | 273 | 63  | w | 10  | 32  |
|    |       |                    |    | 3  | 3  | 8  | 8  | 8  | 5   | 333 | 15  | n | 05  | 74  |
|    |       |                    |    |    |    |    |    |    |     |     |     |   | 34  | 04  |
| 13 | C4orf | Chromosome 4       | 4. | 4. | 4. | 5. | 5. | 4. | 1.6 | 0.7 | 1.6 | U | 0.0 | 0.6 |
| 27 | 32    | open reading frame | 74 | 77 | 91 | 82 | 84 | 92 | 470 | 198 | 47  | p | 31  | 63  |
| 20 |       | 32                 | 96 | 46 | 45 | 74 | 79 | 31 | 450 | 8   | 04  |   | 00  | 32  |
|    |       |                    | 8  | 5  | 7  | 6  | 4  | 4  | 31  |     | 50  |   | 90  | 74  |
|    |       |                    |    |    |    |    |    |    |     |     | 31  |   | 77  | 04  |
| 62 | RSU   | Ras suppressor     | 6. | 7. | 7. | 8. | 8. | 7. | 1.7 | 0.8 | 1.7 | U | 0.0 | 0.6 |
| 51 | 1     | protein 1          | 89 | 08 | 43 | 27 | 18 | 40 | 620 | 172 | 62  | p | 21  | 63  |
|    |       |                    | 19 | 29 | 85 | 10 | 89 | 51 | 359 | 433 | 03  |   | 54  | 32  |
|    |       |                    | 3  |    | 3  | 6  | 2  | 1  | 18  | 33  | 59  |   | 09  | 74  |
|    |       |                    |    |    |    |    |    |    |     |     | 18  |   | 46  | 04  |
| 56 | SH3   | SH3-domain         | 5. | 5. | 4. | 4. | 4. | 4. | -1. | -0. | 1.5 | D | 0.0 | 0.6 |
| 90 | GLB   | GRB2-like          | 27 | 11 | 96 | 25 | 77 | 44 | 543 | 626 | 43  | o | 10  | 63  |
| 4  | 2     | endophilin B2      | 11 | 64 | 59 | 59 | 34 | 49 | 700 | 393 | 70  | w | 60  | 32  |
|    |       |                    | 7  | 5  |    | 2  | 6  | 6  | 989 | 333 | 09  | n | 83  | 74  |
|    |       |                    |    |    |    |    |    |    |     |     | 89  |   | 33  | 04  |
| 63 | ABH   | Abhydrolase        | 8. | 8. | 9. | 7. | 8. | 8. | -1. | -0. | 1.5 | D | 0.0 | 0.6 |
| 87 | D4    | domain containing  | 54 | 97 | 04 | 79 | 25 | 60 | 554 | 636 | 54  | o | 39  | 63  |
| 4  |       | 4                  | 37 | 85 | 70 | 57 | 69 | 64 | 804 | 733 | 80  | w | 93  | 32  |

|    |     |                     |    |    |    |    |    |    |     |     |     |   |     |     |
|----|-----|---------------------|----|----|----|----|----|----|-----|-----|-----|---|-----|-----|
|    |     |                     | 7  |    | 1  | 1  | 1  | 6  | 656 | 333 | 46  | n | 37  | 74  |
|    |     |                     |    |    |    |    |    |    |     |     | 56  |   | 7   | 04  |
| 55 | CCD | Coiled-coil domain  | 3. | 4. | 4. | 5. | 4. | 4. | 2.0 | 1.0 | 2.0 | U | 0.0 | 0.6 |
| 70 | C88 | containing 88A      | 26 | 29 | 30 | 82 | 50 | 58 | 256 | 183 | 25  | p | 49  | 63  |
| 4  | A   |                     | 95 | 16 | 38 | 96 | 97 | 06 | 056 | 533 | 60  |   | 95  | 32  |
|    |     |                     | 1  | 2  | 3  | 2  | 8  | 2  | 49  | 33  | 56  |   | 26  | 74  |
|    |     |                     |    |    |    |    |    |    |     |     | 49  |   | 44  | 04  |
| 54 | LY6 | Lymphocyte          | 5. | 4. | 5. | 4. | 4. | 4. | -1. | -0. | 1.8 | D | 0.0 | 0.6 |
| 74 | K   | antigen 6 complex,  | 63 | 92 | 83 | 55 | 77 | 51 | 802 | 850 | 02  | o | 11  | 63  |
| 2  |     | locus K             | 03 | 75 | 18 | 39 | 32 | 16 | 884 | 306 | 88  | w | 64  | 32  |
|    |     |                     | 7  | 6  |    | 8  | 3  |    | 115 | 667 | 41  | n | 73  | 74  |
|    |     |                     |    |    |    |    |    |    |     |     | 15  |   | 58  | 04  |
| 85 | RER | RAS-like,           | 3. | 4. | 4. | 6. | 6. | 5. | 4.1 | 2.0 | 4.1 | U | 0.0 | 0.6 |
| 00 | G   | estrogen-regulated, | 62 | 33 | 75 | 80 | 83 | 27 | 923 | 677 | 92  | p | 03  | 63  |
| 4  |     | growth inhibitor    | 40 | 47 | 06 | 06 | 74 | 46 | 136 | 466 | 31  |   | 51  | 32  |
|    |     |                     | 5  | 1  | 8  | 4  | 2  | 2  | 79  | 67  | 36  |   | 63  | 74  |
|    |     |                     |    |    |    |    |    |    |     |     | 79  |   | 44  | 04  |
| 71 | TPD | Tumor protein D52   | 10 | 9. | 10 | 9. | 9. | 9. | -1. | -0. | 1.9 | D | 0.0 | 0.6 |
| 63 | 52  |                     | .4 | 83 | .7 | 55 | 61 | 07 | 909 | 933 | 09  | o | 11  | 63  |
|    |     |                     | 90 | 38 | 25 | 55 | 93 | 53 | 299 | 043 | 29  | w | 23  | 32  |
|    |     |                     | 32 | 9  | 2  | 6  | 8  | 4  | 376 | 333 | 93  | n | 62  | 74  |
|    |     |                     |    |    |    |    |    |    |     |     | 76  |   | 25  | 04  |
| 57 | PTP | Protein tyrosine    | 5. | 5. | 5. | 7. | 6. | 6. | 2.2 | 1.1 | 2.2 | U | 0.0 | 0.6 |
| 93 | RG  | phosphatase,        | 31 | 70 | 56 | 18 | 89 | 01 | 547 | 729 | 54  | p | 07  | 63  |
|    |     | receptor type, G    | 51 | 51 | 9  | 97 | 99 | 84 | 591 | 733 | 75  |   | 06  | 32  |
|    |     |                     | 7  | 2  |    | 4  | 9  | 8  | 47  | 33  | 91  |   | 48  | 74  |
|    |     |                     |    |    |    |    |    |    |     |     | 47  |   | 18  | 04  |
| 10 | MAP | Mitogen-activated   | 6. | 6. | 6. | 5. | 5. | 6. | -1. | -0. | 1.5 | D | 0.0 | 0.6 |
| 74 | 3K2 | protein kinase      | 78 | 65 | 32 | 97 | 95 | 06 | 504 | 589 | 04  | o | 11  | 63  |

|                |            |                                                 |                      |                      |                     |                      |                      |                      |                          |                          |                             |                  |                             |                             |
|----------------|------------|-------------------------------------------------|----------------------|----------------------|---------------------|----------------------|----------------------|----------------------|--------------------------|--------------------------|-----------------------------|------------------|-----------------------------|-----------------------------|
| 6              |            | kinase kinase 2                                 | 53<br>7              | 51<br>9              | 42<br>2             | 91                   | 33<br>4              | 31<br>7              | 958<br>113               | 723<br>333               | 95<br>81<br>13              | w<br>n           | 93<br>18<br>98              | 32<br>74<br>04              |
| 34<br>29<br>31 | RFP<br>L4A | Ret finger<br>protein-like 4A                   | 4.<br>49<br>86<br>4  | 4.<br>13<br>04<br>2  | 5.<br>02<br>82<br>1 | 3.<br>46<br>77<br>1  | 3.<br>92<br>05<br>5  | 4.<br>18<br>26<br>1  | -1.<br>619<br>408<br>176 | -0.<br>695<br>466<br>667 | 1.6<br>19<br>40<br>81<br>76 | D<br>o<br>w<br>n | 0.0<br>39<br>53<br>41<br>22 | 0.6<br>63<br>32<br>74<br>04 |
| 85<br>66       | PDX<br>K   | Pyridoxal<br>(pyridoxine,<br>vitamin B6) kinase | 7.<br>17<br>23       | 6.<br>70<br>08<br>3  | 6.<br>53<br>35      | 5.<br>03<br>14<br>7  | 5.<br>71<br>14<br>1  | 6.<br>69<br>26<br>8  | -1.<br>986<br>676<br>081 | -0.<br>990<br>356<br>667 | 1.9<br>86<br>67<br>60<br>81 | D<br>o<br>w<br>n | 0.0<br>48<br>63<br>47<br>28 | 0.6<br>63<br>32<br>74<br>04 |
| 37<br>05       | ITPK<br>1  | Inositol-tetrakispho<br>sphate 1-kinase         | 9.<br>30<br>38<br>9  | 9.<br>32<br>09<br>4  | 9.<br>32<br>44<br>7 | 8.<br>05<br>33<br>2  | 8.<br>54<br>35<br>5  | 9.<br>08<br>90<br>2  | -1.<br>687<br>011<br>724 | -0.<br>754<br>47<br>724  | 1.6<br>87<br>01<br>17<br>24 | D<br>o<br>w<br>n | 0.0<br>23<br>99<br>97<br>24 | 0.6<br>63<br>32<br>74<br>04 |
| 55<br>71<br>5  | DOK<br>4   | Docking protein 4                               | 9.<br>92<br>10<br>5  | 9.<br>43<br>73<br>2  | 9.<br>61<br>70<br>2 | 8.<br>41<br>74<br>1  | 9.<br>09<br>90<br>5  | 9.<br>43<br>59       | -1.<br>595<br>862<br>846 | -0.<br>674<br>336<br>667 | 1.5<br>95<br>86<br>28<br>46 | D<br>o<br>w<br>n | 0.0<br>48<br>95<br>53<br>04 | 0.6<br>63<br>32<br>74<br>04 |
| 61<br>93       | RPS5       | Ribosomal protein<br>S5                         | 11<br>.0<br>19<br>29 | 11<br>.0<br>37<br>41 | 11<br>.5<br>59<br>2 | 12<br>.2<br>85<br>56 | 11<br>.9<br>45<br>26 | 11<br>.4<br>60<br>26 | 1.6<br>152<br>155<br>07  | 0.6<br>917<br>266<br>67  | 1.6<br>15<br>21<br>55<br>07 | U<br>p           | 0.0<br>31<br>47<br>02<br>05 | 0.6<br>63<br>32<br>74<br>04 |
| 59             | RCN        | Reticulocalbin 1                                | 4.                   | 4.                   | 4.                  | 5.                   | 5.                   | 4.                   | 1.8                      | 0.8                      | 1.8                         | U                | 0.0                         | 0.6                         |

|    |      |                   |    |    |    |    |    |    |     |     |     |   |     |     |
|----|------|-------------------|----|----|----|----|----|----|-----|-----|-----|---|-----|-----|
| 54 | 1    |                   | 19 | 23 | 54 | 92 | 09 | 64 | 656 | 996 | 65  | p | 25  | 63  |
|    |      |                   | 20 | 30 | 16 | 43 | 71 | 42 | 435 | 733 | 64  |   | 99  | 32  |
|    |      |                   | 5  | 9  | 1  |    | 8  | 9  | 01  | 33  | 35  |   | 45  | 74  |
|    |      |                   |    |    |    |    |    |    |     |     | 01  |   | 88  | 04  |
| 46 | MYC  | V-myc avian       | 4. | 4. | 4. | 8. | 8. | 5. | 5.7 | 2.5 | 5.7 | U | 0.0 | 0.6 |
| 09 |      | myelocytomatosis  | 40 | 94 | 81 | 03 | 23 | 45 | 390 | 208 | 39  | p | 08  | 63  |
|    |      | viral oncogene    | 16 | 32 | 40 | 02 | 36 | 76 | 687 | 166 | 06  |   | 67  | 32  |
|    |      | homolog           | 7  | 4  | 7  | 3  |    |    | 89  | 67  | 87  |   | 89  | 74  |
|    |      |                   |    |    |    |    |    |    |     |     | 89  |   | 66  | 04  |
| 65 | RPL1 | Ribosomal protein | 10 | 10 | 11 | 11 | 11 | 11 | 1.7 | 0.8 | 1.7 | U | 0.0 | 0.6 |
| 32 | 5P3  | L15 pseudogene 3  | .8 | .5 | .1 | .9 | .6 | .5 | 990 | 472 | 99  | p | 04  | 63  |
| 32 |      |                   | 11 | 62 | 48 | 25 | 28 | 10 | 184 | 1   | 01  |   | 20  | 32  |
|    |      |                   | 67 | 48 | 35 | 35 | 17 | 61 | 72  |     | 84  |   | 22  | 74  |
|    |      |                   |    |    |    |    |    |    |     |     | 72  |   | 42  | 04  |
| 81 | MAG  | Melanoma antigen  | 6. | 6. | 6. | 6. | 5. | 6. | -1. | -0. | 1.5 | D | 0.0 | 0.6 |
| 55 | ED4  | family D4B        | 44 | 68 | 56 | 14 | 62 | 01 | 554 | 636 | 54  | o | 11  | 63  |
| 7  | B    |                   | 49 | 92 | 18 | 30 | 80 | 45 | 858 | 783 | 85  | w | 94  | 32  |
|    |      |                   | 2  | 1  | 2  | 1  | 2  | 7  | 543 | 333 | 85  | n | 28  | 74  |
|    |      |                   |    |    |    |    |    |    |     |     | 43  |   | 04  | 04  |
| 25 | ABI3 | ABI family        | 9. | 8. | 8. | 9. | 9. | 9. | 1.7 | 0.7 | 1.7 | U | 0.0 | 0.6 |
| 89 | BP   | member 3 binding  | 28 | 94 | 82 | 97 | 52 | 87 | 130 | 765 | 13  | p | 05  | 63  |
| 0  |      | protein           | 60 | 21 | 16 | 18 | 93 | 84 | 611 | 766 | 06  |   | 69  | 32  |
|    |      |                   | 5  | 4  | 9  | 4  | 7  |    | 68  | 67  | 11  |   | 91  | 74  |
|    |      |                   |    |    |    |    |    |    |     |     | 68  |   | 47  | 04  |
| 10 | STIP | Stress induced    | 4. | 3. | 5. | 5. | 5. | 5. | 1.6 | 0.7 | 1.6 | U | 0.0 | 0.6 |
| 96 | 1    | phosphoprotein 1  | 89 | 99 | 01 | 24 | 12 | 79 | 848 | 526 | 84  | p | 48  | 63  |
| 3  |      |                   | 86 | 89 | 30 | 16 | 89 | 80 | 809 | 466 | 88  |   | 33  | 32  |
|    |      |                   | 3  | 7  | 8  | 6  | 5  | 1  | 61  | 67  | 09  |   | 94  | 74  |
|    |      |                   |    |    |    |    |    |    |     |     | 61  |   | 65  | 04  |

|    |      |                     |    |    |    |    |    |    |     |     |     |   |     |     |
|----|------|---------------------|----|----|----|----|----|----|-----|-----|-----|---|-----|-----|
| 27 | PCD  | Protocadherin 17    | 4. | 5. | 4. | 6. | 6. | 5. | 3.5 | 1.8 | 3.5 | U | 0.0 | 0.6 |
| 25 | H17  |                     | 06 | 31 | 47 | 95 | 52 | 90 | 955 | 462 | 95  | p | 01  | 63  |
| 3  |      |                     | 51 | 07 | 01 | 64 | 31 | 50 | 355 | 066 | 53  |   | 96  | 32  |
|    |      |                     | 2  | 2  | 2  | 5  | 2  | 1  | 32  | 67  | 55  |   | 18  | 74  |
|    |      |                     |    |    |    |    |    |    |     |     | 32  |   | 16  | 04  |
| 10 | UBE  | UBE2F-SCLY          | 7. | 6. | 6. | 5. | 6. | 6. | -1. | -0. | 1.6 | D | 0.0 | 0.6 |
| 05 | 2F-S | readthrough (NMD    | 20 | 87 | 83 | 83 | 29 | 66 | 626 | 701 | 26  | o | 23  | 63  |
| 33 | CLY  | candidate)          | 04 | 82 | 10 | 97 | 98 | 58 | 123 | 436 | 12  | w | 83  | 32  |
| 17 |      |                     | 4  | 1  | 7  | 2  | 7  | 2  | 315 | 667 | 33  | n | 63  | 74  |
| 9  |      |                     |    |    |    |    |    |    |     |     | 15  |   | 95  | 04  |
| 28 | FAM  | Family with         | 10 | 9. | 10 | 7. | 8. | 10 | -2. | -1. | 2.5 | D | 0.0 | 0.6 |
| 50 | 150B | sequence similarity | .4 | 83 | .3 | 68 | 80 | .0 | 576 | 365 | 76  | o | 43  | 63  |
| 16 |      | 150 member B        | 79 | 05 | 38 | 62 | 57 | 60 | 382 | 346 | 38  | w | 39  | 32  |
|    |      |                     | 36 | 5  | 35 | 7  | 4  | 21 | 266 | 667 | 22  | n | 30  | 74  |
|    |      |                     |    |    |    |    |    |    |     |     | 66  |   | 56  | 04  |
| 19 | EDN  | Endothelin          | 4. | 5. | 4. | 7. | 6. | 5. | 3.9 | 1.9 | 3.9 | U | 0.0 | 0.6 |
| 09 | RA   | receptor type A     | 36 | 45 | 72 | 83 | 71 | 95 | 691 | 888 | 69  | p | 05  | 63  |
|    |      |                     | 80 | 21 | 33 | 16 | 92 | 91 | 864 | 433 | 18  |   | 08  | 32  |
|    |      |                     | 7  | 3  | 1  | 5  | 4  | 5  | 49  | 33  | 64  |   | 32  | 74  |
|    |      |                     |    |    |    |    |    |    |     |     | 49  |   | 42  | 04  |
| 46 | MYH  | Myosin, heavy       | 5. | 4. | 4. | 3. | 3. | 4. | -1. | -0. | 1.9 | D | 0.0 | 0.6 |
| 21 | 3    | chain 3, skeletal   | 06 | 47 | 41 | 36 | 63 | 00 | 975 | 982 | 75  | o | 04  | 63  |
|    |      | muscle, embryonic   | 06 | 53 | 54 | 32 | 21 | 87 | 822 | 453 | 82  | w | 32  | 32  |
|    |      |                     | 4  | 9  | 3  |    | 2  | 8  | 482 | 333 | 24  | n | 14  | 74  |
|    |      |                     |    |    |    |    |    |    |     |     | 82  |   | 69  | 04  |
| 16 | GRA  | GRP1 (general       | 6. | 6. | 6. | 7. | 8. | 6. | 1.8 | 0.8 | 1.8 | U | 0.0 | 0.6 |
| 06 | SP   | receptor for        | 33 | 74 | 54 | 29 | 08 | 86 | 322 | 735 | 32  | p | 27  | 63  |
| 22 |      | phosphoinositides   | 67 | 65 | 62 | 89 | 55 | 58 | 249 | 966 | 22  |   | 89  | 32  |
|    |      | 1)-associated       | 9  | 3  |    | 5  | 4  | 2  | 84  | 67  | 49  |   | 24  | 74  |





|    |      |                       |    |    |    |    |    |    |     |     |     |   |     |     |
|----|------|-----------------------|----|----|----|----|----|----|-----|-----|-----|---|-----|-----|
|    |      |                       |    | 2  | 9  | 6  | 3  |    | 81  |     | 01  |   | 56  | 74  |
|    |      |                       |    |    |    |    |    |    |     |     | 81  |   | 89  | 04  |
| 57 | PTG  | Prostaglandin-endo    | 3. | 4. | 2. | 5. | 6. | 6. | 6.1 | 2.6 | 6.1 | U | 0.0 | 0.6 |
| 43 | S2   | peroxide synthase     | 06 | 64 | 86 | 70 | 00 | 74 | 831 | 283 | 83  | p | 01  | 63  |
|    |      | 2 (prostaglandin      | 11 | 44 | 29 | 51 | 01 | 82 | 842 | 5   | 18  |   | 19  | 32  |
|    |      | G/H synthase and      | 3  | 4  | 3  | 3  | 7  | 5  | 65  |     | 42  |   | 54  | 74  |
|    |      | cyclooxygenase)       |    |    |    |    |    |    |     |     | 65  |   | 79  | 04  |
| 10 | BOR  | BORCS7-ASMT           | 7. | 7. | 8. | 5. | 4. | 8. | -3. | -1. | 3.8 | D | 0.0 | 0.6 |
| 05 | CS7- | readthrough (NMD      | 93 | 81 | 68 | 47 | 96 | 19 | 818 | 933 | 18  | o | 45  | 63  |
| 28 | ASM  | candidate)            | 68 | 55 | 91 | 93 | 83 | 47 | 536 | 02  | 53  | w | 45  | 32  |
| 00 | T    |                       | 7  | 2  | 7  | 5  | 7  | 8  | 992 |     | 69  | n | 65  | 74  |
| 7  |      |                       |    |    |    |    |    |    |     |     | 92  |   | 54  | 04  |
| 10 | SPR  | Sprouty RTK           | 7. | 7. | 8. | 9. | 9. | 8. | 2.1 | 1.1 | 2.1 | U | 0.0 | 0.6 |
| 25 | Y1   | signaling             | 97 | 70 | 10 | 10 | 62 | 38 | 567 | 088 | 56  | p | 09  | 63  |
| 2  |      | antagonist 1          | 59 | 39 | 75 | 05 | 73 | 60 | 017 | 266 | 70  |   | 94  | 32  |
|    |      |                       | 6  | 9  | 1  | 9  |    | 5  | 3   | 67  | 17  |   | 34  | 74  |
|    |      |                       |    |    |    |    |    |    |     |     | 3   |   | 52  | 04  |
| 55 | PRK  | Protein kinase,       | 3. | 3. | 3. | 4. | 5. | 4. | 2.3 | 1.2 | 2.3 | U | 0.0 | 0.6 |
| 77 | AR2  | camp-dependent,       | 59 | 80 | 54 | 74 | 39 | 41 | 006 | 020 | 00  | p | 02  | 63  |
|    | B    | regulatory subunit    | 41 | 79 | 00 | 20 | 53 | 08 | 954 | 7   | 69  |   | 07  | 32  |
|    |      | type II $\beta$       | 2  | 1  | 1  | 5  | 2  | 8  | 14  |     | 54  |   | 78  | 74  |
|    |      |                       |    |    |    |    |    |    |     |     | 14  |   | 47  | 04  |
| 27 | GNG  | Guanine nucleotide    | 6. | 7. | 7. | 8. | 9. | 8. | 2.6 | 1.4 | 2.6 | U | 0.0 | 0.6 |
| 91 | 11   | binding protein (G    | 68 | 65 | 33 | 77 | 00 | 13 | 604 | 116 | 60  | p | 03  | 63  |
|    |      | protein), $\gamma$ 11 | 47 | 46 | 82 | 13 | 66 | 46 | 924 | 933 | 49  |   | 22  | 32  |
|    |      |                       | 1  |    | 3  | 8  |    | 4  | 94  | 33  | 24  |   | 87  | 74  |
|    |      |                       |    |    |    |    |    |    |     |     | 94  |   | 36  | 04  |
| 38 | AFF3 | AF4/FMR2 family       | 3. | 4. | 4. | 5. | 4. | 4. | 2.0 | 1.0 | 2.0 | U | 0.0 | 0.6 |
| 99 |      | member 3              | 16 | 24 | 01 | 53 | 72 | 17 | 060 | 043 | 06  | p | 41  | 63  |

|    |     |                    |    |    |    |    |    |    |     |     |     |   |     |     |
|----|-----|--------------------|----|----|----|----|----|----|-----|-----|-----|---|-----|-----|
|    |     |                    | 55 | 87 | 58 | 58 | 97 | 77 | 580 | 633 | 05  |   | 86  | 32  |
|    |     |                    | 9  | 7  | 4  | 1  | 4  | 4  | 21  | 33  | 80  |   | 52  | 74  |
|    |     |                    |    |    |    |    |    |    |     |     | 21  |   | 43  | 04  |
| 92 | LMB | LMBR1 domain       | 4. | 4. | 4. | 3. | 3. | 3. | -1. | -0. | 1.5 | D | 0.0 | 0.6 |
| 25 | RD2 | containing 2       | 51 | 28 | 14 | 48 | 72 | 93 | 517 | 601 | 17  | o | 08  | 63  |
| 5  |     |                    | 63 | 08 | 65 | 26 | 11 | 44 | 626 | 816 | 62  | w | 55  | 32  |
|    |     |                    | 2  |    | 6  | 5  | 2  | 6  | 385 | 667 | 63  | n | 83  | 74  |
|    |     |                    |    |    |    |    |    |    |     |     | 85  |   | 15  | 04  |
| 10 | STA | Stromal antigen 3  | 5. | 6. | 6. | 5. | 5. | 5. | -1. | -0. | 1.5 | D | 0.0 | 0.6 |
| 73 | G3  |                    | 58 | 09 | 20 | 35 | 32 | 43 | 508 | 592 | 08  | o | 20  | 63  |
| 4  |     |                    | 91 | 27 | 45 | 07 | 37 | 31 | 282 | 906 | 28  | w | 47  | 32  |
|    |     |                    | 1  | 1  | 3  |    | 7  | 6  | 497 | 667 | 24  | n | 26  | 74  |
|    |     |                    |    |    |    |    |    |    |     |     | 97  |   | 17  | 04  |
| 90 | TM4 | Transmembrane 4    | 8. | 8. | 9. | 7. | 6. | 8. | -2. | -1. | 2.0 | D | 0.0 | 0.6 |
| 32 | SF5 | L six family       | 99 | 60 | 04 | 96 | 92 | 66 | 041 | 029 | 41  | o | 43  | 63  |
|    |     | member 5           | 40 | 96 | 15 | 56 | 24 | 92 | 057 | 316 | 05  | w | 83  | 32  |
|    |     |                    | 6  | 9  | 8  | 2  | 9  | 7  | 274 | 667 | 72  | n | 38  | 74  |
|    |     |                    |    |    |    |    |    |    |     |     | 74  |   | 17  | 04  |
| 56 | SEM | Sema domain,       | 3. | 4. | 4. | 5. | 6. | 5. | 2.4 | 1.2 | 2.4 | U | 0.0 | 0.6 |
| 92 | A3G | immunoglobulin     | 98 | 91 | 73 | 79 | 72 | 00 | 511 | 934 | 51  | p | 24  | 63  |
| 0  |     | domain (Ig), short | 80 | 63 | 82 | 13 | 47 | 70 | 690 | 7   | 16  |   | 13  | 32  |
|    |     | basic domain,      | 4  | 4  | 7  | 4  |    | 2  | 74  |     | 90  |   | 11  | 74  |
|    |     | secreted,          |    |    |    |    |    |    |     |     | 74  |   | 3   | 04  |
|    |     | (semaphorin) 3G    |    |    |    |    |    |    |     |     |     |   |     |     |
| 88 | VNN | Vanin 1            | 5. | 5. | 5. | 4. | 4. | 5. | -1. | -0. | 1.5 | D | 0.0 | 0.6 |
| 76 | 1   |                    | 45 | 65 | 39 | 56 | 77 | 29 | 545 | 628 | 45  | o | 23  | 63  |
|    |     |                    | 98 | 97 | 06 | 13 | 32 | 01 | 928 | 473 | 92  | w | 53  | 32  |
|    |     |                    | 1  | 1  | 9  | 8  | 3  | 8  | 219 | 333 | 82  | n | 56  | 74  |
|    |     |                    |    |    |    |    |    |    |     |     | 19  |   | 67  | 04  |

|               |                      |                                                                    |                     |                     |                     |                     |                     |                     |                          |                             |                             |                  |                             |                             |
|---------------|----------------------|--------------------------------------------------------------------|---------------------|---------------------|---------------------|---------------------|---------------------|---------------------|--------------------------|-----------------------------|-----------------------------|------------------|-----------------------------|-----------------------------|
| 23<br>03<br>4 | SAM<br>D4A<br>4A     | Sterile $\alpha$ motif<br>domain containing<br>4A                  | 6.<br>17<br>34<br>8 | 6.<br>91<br>99<br>3 | 6.<br>36<br>79<br>5 | 8.<br>49<br>95<br>4 | 7.<br>18<br>80<br>8 | 7.<br>47<br>41<br>5 | 2.3<br>513<br>185<br>43  | 1.2<br>334<br>7<br>85<br>43 | 2.3<br>51<br>31<br>85<br>43 | U<br>p           | 0.0<br>12<br>74<br>73<br>85 | 0.6<br>63<br>32<br>74<br>04 |
| 55<br>19<br>5 | C14o<br>rf105<br>105 | Chromosome 14<br>open reading frame<br>105                         | 8.<br>79<br>60<br>3 | 7.<br>91<br>99<br>5 | 8.<br>24<br>52<br>2 | 7.<br>29<br>85<br>1 | 7.<br>35<br>27<br>4 | 8.<br>09<br>27<br>4 | -1.<br>666<br>710<br>265 | -0.<br>737<br>003<br>333    | 1.6<br>66<br>71<br>02<br>65 | D<br>o<br>w<br>n | 0.0<br>46<br>44<br>09<br>69 | 0.6<br>63<br>32<br>74<br>04 |
| 10<br>76<br>6 | TOB<br>2<br>6        | Transducer of<br>ERBB2, 2                                          | 8.<br>59<br>42<br>2 | 8.<br>76<br>57<br>3 | 7.<br>82<br>33<br>3 | 6.<br>90<br>31<br>3 | 7.<br>67<br>43<br>1 | 7.<br>71<br>52<br>1 | -1.<br>950<br>084<br>537 | -0.<br>963<br>536<br>667    | 1.9<br>50<br>08<br>45<br>37 | D<br>o<br>w<br>n | 0.0<br>21<br>28<br>07<br>76 | 0.6<br>63<br>32<br>74<br>04 |
| 31<br>75<br>1 | ONE<br>CUT<br>1      | One cut homeobox<br>1                                              | 7.<br>42<br>79<br>9 | 7.<br>75<br>84<br>7 | 7.<br>34<br>02<br>8 | 6.<br>89<br>12<br>2 | 6.<br>64<br>61<br>8 | 7.<br>06<br>94<br>9 | -1.<br>558<br>275<br>153 | -0.<br>639<br>95<br>153     | 1.5<br>58<br>27<br>51<br>53 | D<br>o<br>w<br>n | 0.0<br>12<br>59<br>41<br>77 | 0.6<br>63<br>32<br>74<br>04 |
| 11<br>27<br>8 | KLF<br>12<br>8       | Kruppel-like factor<br>12                                          | 4.<br>16<br>03<br>2 | 4.<br>22<br>18<br>7 | 4.<br>71<br>13<br>9 | 5.<br>05<br>66<br>2 | 5.<br>07<br>54<br>6 | 4.<br>81<br>78<br>5 | 1.5<br>355<br>796<br>36  | 0.6<br>187<br>833<br>33     | 1.5<br>35<br>57<br>96<br>36 | U<br>p           | 0.0<br>13<br>83<br>40<br>33 | 0.6<br>63<br>32<br>74<br>04 |
| 97<br>2       | CD7<br>4             | CD74 molecule,<br>major<br>histocompatibility<br>complex, class II | 5.<br>58<br>87<br>1 | 7.<br>05<br>01<br>6 | 6.<br>57<br>84<br>5 | 7.<br>63<br>64<br>9 | 7.<br>33<br>92<br>3 | 7.<br>37<br>51<br>7 | 2.0<br>626<br>847<br>35  | 1.0<br>445<br>233<br>33     | 2.0<br>62<br>68<br>47       | U<br>p           | 0.0<br>23<br>05<br>16       | 0.6<br>63<br>32<br>74       |

|    |     |                     |    |    |    |    |    |    |     |     |     |   |     |     |
|----|-----|---------------------|----|----|----|----|----|----|-----|-----|-----|---|-----|-----|
|    |     | invariant chain     |    |    |    |    |    |    |     |     | 35  |   | 51  | 04  |
| 80 | MYC | Myc target 1        | 3. | 4. | 4. | 4. | 4. | 4. | 1.5 | 0.6 | 1.5 | U | 0.0 | 0.6 |
| 17 | T1  |                     | 95 | 20 | 20 | 84 | 98 | 33 | 165 | 008 | 16  | p | 19  | 63  |
| 7  |     |                     | 39 | 01 | 48 | 17 | 37 | 59 | 783 | 2   | 57  |   | 18  | 32  |
|    |     |                     | 1  | 5  | 8  |    | 3  | 7  | 15  |     | 83  |   | 12  | 74  |
|    |     |                     |    |    |    |    |    |    |     |     | 15  |   | 36  | 04  |
| 74 | VWF | Von Willebrand      | 4. | 5. | 6. | 7. | 7. | 5. | 3.3 | 1.7 | 3.3 | U | 0.0 | 0.6 |
| 50 |     | factor              | 25 | 04 | 39 | 50 | 71 | 64 | 009 | 228 | 00  | p | 43  | 63  |
|    |     |                     | 70 | 42 | 43 | 92 | 32 | 17 | 165 | 666 | 91  |   | 18  | 32  |
|    |     |                     | 8  | 8  | 2  | 5  | 7  | 6  | 5   | 67  | 65  |   | 81  | 74  |
|    |     |                     |    |    |    |    |    |    |     |     | 5   |   | 12  | 04  |
| 99 | HNR | Heterogeneous       | 7. | 6. | 7. | 7. | 8. | 7. | 1.9 | 0.9 | 1.9 | U | 0.0 | 0.6 |
| 87 | NPD | nuclear             | 13 | 25 | 26 | 95 | 05 | 48 | 278 | 469 | 27  | p | 17  | 63  |
|    | L   | ribonucleoprotein   | 18 | 15 | 23 | 06 | 35 | 24 | 239 | 733 | 82  |   | 62  | 32  |
|    |     | D like              | 3  | 7  | 8  | 4  | 7  | 9  | 81  | 33  | 39  |   | 31  | 74  |
|    |     |                     |    |    |    |    |    |    |     |     | 81  |   | 52  | 04  |
| 93 | KLF | Kruppel-like factor | 5. | 5. | 6. | 8. | 9. | 6. | 4.2 | 2.0 | 4.2 | U | 0.0 | 0.6 |
| 14 | 4   | 4 (gut)             | 43 | 34 | 78 | 22 | 02 | 58 | 468 | 864 | 46  | p | 15  | 63  |
|    |     |                     | 64 | 85 | 85 | 35 | 38 | 54 | 995 | 1   | 89  |   | 96  | 32  |
|    |     |                     | 7  | 5  | 1  |    | 2  | 4  | 92  |     | 95  |   | 69  | 74  |
|    |     |                     |    |    |    |    |    |    |     |     | 92  |   | 15  | 04  |
| 80 | TSG | Testis specific 10  | 5. | 4. | 5. | 3. | 3. | 3. | -2. | -1. | 2.5 | D | 0.0 | 0.6 |
| 70 | A10 |                     | 25 | 12 | 21 | 21 | 48 | 84 | 553 | 352 | 53  | o | 04  | 63  |
| 5  |     |                     | 75 | 76 | 82 | 23 | 82 | 49 | 719 | 6   | 71  | w | 63  | 32  |
|    |     |                     | 3  | 1  |    | 2  | 3  | 9  | 379 |     | 93  | n | 85  | 74  |
|    |     |                     |    |    |    |    |    |    |     |     | 79  |   | 84  | 04  |
| 88 | WIS | WNT1 inducible      | 6. | 6. | 8. | 5. | 5. | 4. | -3. | -1. | 3.9 | D | 0.0 | 0.6 |
| 39 | P2  | signaling pathway   | 43 | 55 | 10 | 08 | 57 | 51 | 929 | 974 | 29  | o | 04  | 63  |
|    |     | protein 2           | 27 | 67 | 46 | 02 | 54 | 55 | 284 | 266 | 28  | w | 85  | 32  |

|    |      |                     |    |    |    |    |    |    |     |     |     |   |     |     |
|----|------|---------------------|----|----|----|----|----|----|-----|-----|-----|---|-----|-----|
|    |      |                     | 5  | 3  | 3  | 6  | 8  | 7  | 6   | 667 | 46  | n | 04  | 74  |
|    |      |                     |    |    |    |    |    |    |     |     |     |   | 83  | 04  |
| 80 | NR4  | Nuclear receptor    | 3. | 3. | 3. | 4. | 5. | 5. | 2.1 | 1.0 | 2.1 | U | 0.0 | 0.6 |
| 13 | A3   | subfamily 4 group   | 74 | 82 | 87 | 23 | 41 | 09 | 430 | 996 | 43  | p | 07  | 63  |
|    |      | A member 3          | 68 | 55 | 56 | 18 | 92 | 58 | 269 | 5   | 02  |   | 07  | 32  |
|    |      |                     | 3  |    | 1  | 6  |    | 3  | 6   |     | 69  |   | 02  | 74  |
|    |      |                     |    |    |    |    |    |    |     |     | 6   |   | 58  | 04  |
| 11 | RPL3 | Ribosomal protein   | 4. | 5. | 5. | 7. | 6. | 5. | 2.1 | 1.1 | 2.1 | U | 0.0 | 0.6 |
| 68 | 9L   | L39 like            | 76 | 40 | 11 | 02 | 23 | 33 | 478 | 028 | 47  | p | 33  | 63  |
| 32 |      |                     | 46 | 57 | 34 | 50 | 26 | 48 | 501 | 933 | 85  |   | 19  | 32  |
|    |      |                     | 5  | 6  | 3  | 3  |    | 9  | 35  | 33  | 01  |   | 09  | 74  |
|    |      |                     |    |    |    |    |    |    |     |     | 35  |   | 79  | 04  |
| 25 | MSR  | Methionine          | 5. | 5. | 4. | 6. | 5. | 5. | 1.8 | 0.8 | 1.8 | U | 0.0 | 0.6 |
| 38 | B3   | sulfoxide reductase | 13 | 49 | 96 | 91 | 59 | 70 | 348 | 756 | 34  | p | 48  | 63  |
| 27 |      | B3                  | 36 | 62 | 31 | 84 | 74 | 42 | 727 | 8   | 87  |   | 54  | 32  |
|    |      |                     | 9  | 8  | 4  | 3  | 5  | 7  | 32  |     | 27  |   | 37  | 74  |
|    |      |                     |    |    |    |    |    |    |     |     | 32  |   | 33  | 04  |
| 14 | PPP1 | Protein             | 7. | 7. | 7. | 6. | 6. | 6. | -1. | -0. | 1.6 | D | 0.0 | 0.6 |
| 53 | R36  | phosphatase 1       | 54 | 03 | 28 | 40 | 44 | 88 | 633 | 708 | 33  | o | 12  | 63  |
| 76 |      | regulatory subunit  | 53 | 89 | 10 | 38 | 79 | 84 | 968 | 38  | 96  | w | 46  | 32  |
|    |      | 36                  | 8  | 1  | 5  | 1  | 9  |    | 306 |     | 83  | n | 13  | 74  |
|    |      |                     |    |    |    |    |    |    |     |     | 06  |   | 46  | 04  |
| 79 | CPE  | Cadherin-like and   | 5. | 7. | 6. | 8. | 7. | 7. | 3.6 | 1.8 | 3.6 | U | 0.0 | 0.6 |
| 97 | D1   | PC-esterase         | 31 | 35 | 19 | 91 | 91 | 60 | 284 | 593 | 28  | p | 12  | 63  |
| 4  |      | domain containing   | 49 | 20 | 01 | 94 | 00 | 57 | 833 | 666 | 48  |   | 17  | 32  |
|    |      | 1                   | 9  | 1  | 5  | 1  | 8  | 6  | 92  | 67  | 33  |   | 41  | 74  |
|    |      |                     |    |    |    |    |    |    |     |     | 92  |   | 42  | 04  |
| 38 | SER  | Stress-associated   | 5. | 5. | 5. | 6. | 6. | 5. | 1.8 | 0.8 | 1.8 | U | 0.0 | 0.6 |
| 79 | P2   | endoplasmic         | 26 | 96 | 00 | 27 | 75 | 75 | 010 | 488 | 01  | p | 39  | 63  |

|                |                 |                                                                     |                     |                     |                     |                     |                     |                     |                          |                          |                             |                  |                             |                             |
|----------------|-----------------|---------------------------------------------------------------------|---------------------|---------------------|---------------------|---------------------|---------------------|---------------------|--------------------------|--------------------------|-----------------------------|------------------|-----------------------------|-----------------------------|
| 23             |                 | reticulum protein family member 2                                   | 46<br>7             | 27<br>3             | 57<br>1             | 23<br>7             | 13<br>6             | 59<br>3             | 646<br>9                 | 5                        | 06<br>46<br>9               |                  | 17<br>21<br>94              | 32<br>74<br>04              |
| 18<br>38       | DTN<br>B        | Dystrobrevin $\beta$                                                | 6.<br>60<br>18<br>7 | 6.<br>80<br>85<br>2 | 6.<br>27<br>05<br>4 | 5.<br>23<br>27<br>5 | 5.<br>98<br>60<br>9 | 5.<br>90<br>13      | -1.<br>807<br>000<br>201 | -0.<br>853<br>596<br>667 | 1.8<br>07<br>00<br>02<br>01 | D<br>o<br>w<br>n | 0.0<br>12<br>50<br>29<br>81 | 0.6<br>63<br>32<br>74<br>04 |
| 80<br>77<br>7  | CYB<br>5B       | Cytochrome b5 type B (outer mitochondrial membrane)                 | 4.<br>68<br>32<br>1 | 4.<br>54<br>98<br>9 | 4.<br>84<br>34<br>3 | 5.<br>54<br>34<br>4 | 5.<br>14<br>69<br>9 | 5.<br>18<br>51<br>5 | 1.5<br>153<br>839<br>08  | 0.5<br>996<br>833<br>33  | 1.5<br>15<br>38<br>39<br>08 | U<br>p           | 0.0<br>10<br>08<br>13<br>77 | 0.6<br>63<br>32<br>74<br>04 |
| 79<br>76<br>7  | ELM<br>O3       | Engulfment and cell motility 3                                      | 8.<br>72<br>04<br>3 | 8.<br>52<br>69<br>9 | 8.<br>14<br>69<br>9 | 7.<br>37<br>43<br>8 | 7.<br>55<br>86<br>2 | 8.<br>14<br>22<br>8 | -1.<br>708<br>870<br>809 | -0.<br>773<br>043<br>333 | 1.7<br>08<br>87<br>08<br>09 | D<br>o<br>w<br>n | 0.0<br>19<br>28<br>08<br>58 | 0.6<br>63<br>32<br>74<br>04 |
| 67<br>78<br>13 | SNO<br>RA3<br>0 | Small nucleolar RNA, H/ACA box 30                                   | 5.<br>66<br>10<br>2 | 5.<br>65<br>93<br>2 | 5.<br>78<br>21<br>9 | 4.<br>92<br>54<br>3 | 5.<br>10<br>04<br>8 | 5.<br>27<br>65<br>5 | -1.<br>515<br>741<br>081 | -0.<br>600<br>023<br>333 | 1.5<br>15<br>74<br>10<br>81 | D<br>o<br>w<br>n | 0.0<br>06<br>50<br>51<br>95 | 0.6<br>63<br>32<br>74<br>04 |
| 11<br>20<br>9  | MST<br>1P2      | Macrophage stimulating (hepatocyte growth factor-like) pseudogene 2 | 9.<br>83<br>82<br>9 | 8.<br>77<br>68<br>1 | 8.<br>69<br>80<br>2 | 8.<br>23<br>50<br>1 | 7.<br>66<br>34<br>8 | 8.<br>62<br>64<br>7 | -1.<br>904<br>466<br>178 | -0.<br>929<br>386<br>667 | 1.9<br>04<br>46<br>61<br>78 | D<br>o<br>w<br>n | 0.0<br>41<br>92<br>63<br>07 | 0.6<br>63<br>32<br>74<br>04 |
| 23             | AFF2            | AF4/FMR2 family                                                     | 4.                  | 4.                  | 4.                  | 3.                  | 4.                  | 4.                  | -1.                      | -0.                      | 1.6                         | D                | 0.0                         | 0.6                         |

|    |      |                      |    |    |    |    |    |    |     |     |     |   |     |     |
|----|------|----------------------|----|----|----|----|----|----|-----|-----|-----|---|-----|-----|
| 34 |      | member 2             | 43 | 75 | 79 | 42 | 29 | 19 | 614 | 691 | 14  | o | 28  | 63  |
|    |      |                      | 39 | 69 | 54 | 65 | 00 | 53 | 887 | 433 | 88  | w | 31  | 32  |
|    |      |                      | 3  | 2  | 6  | 8  | 7  | 6  | 13  | 333 | 71  | n | 18  | 74  |
|    |      |                      |    |    |    |    |    |    |     |     | 3   |   | 81  | 04  |
| 25 | CNR  | Cannabinoid          | 5. | 6. | 6. | 7. | 7. | 6. | 2.2 | 1.1 | 2.2 | U | 0.0 | 0.6 |
| 92 | IP1  | receptor interacting | 49 | 92 | 51 | 96 | 83 | 64 | 478 | 685 | 47  | p | 42  | 63  |
| 7  |      | protein 1            | 46 | 79 | 97 | 10 | 70 | 98 | 150 | 233 | 81  |   | 34  | 32  |
|    |      |                      | 1  | 5  | 1  | 3  | 1  |    | 46  | 33  | 50  |   | 94  | 74  |
|    |      |                      |    |    |    |    |    |    |     |     | 46  |   | 72  | 04  |
| 83 | FZD  | Frizzled class       | 5. | 6. | 5. | 7. | 7. | 6. | 2.2 | 1.1 | 2.2 | U | 0.0 | 0.6 |
| 24 | 7    | receptor 7           | 10 | 23 | 65 | 04 | 32 | 13 | 535 | 721 | 53  | p | 19  | 63  |
|    |      |                      | 08 | 14 | 60 | 22 | 37 | 88 | 039 | 7   | 50  |   | 97  | 32  |
|    |      |                      | 1  | 8  | 4  | 6  | 8  |    | 83  |     | 39  |   | 2   | 74  |
|    |      |                      |    |    |    |    |    |    |     |     | 83  |   |     | 04  |
| 14 | WIP  | WAS/WASL             | 7. | 6. | 6. | 6. | 5. | 6. | -1. | -0. | 1.6 | D | 0.0 | 0.6 |
| 71 | F2   | interacting protein  | 21 | 88 | 98 | 32 | 95 | 69 | 628 | 703 | 28  | o | 16  | 63  |
| 79 |      | family member 2      | 54 | 87 | 25 | 86 | 50 | 29 | 251 | 323 | 25  | w | 64  | 32  |
|    |      |                      | 1  |    | 1  | 4  | 5  | 6  | 249 | 333 | 12  | n | 27  | 74  |
|    |      |                      |    |    |    |    |    |    |     |     | 49  |   | 94  | 04  |
| 65 | GRA  | GRAM domain          | 4. | 5. | 5. | 5. | 5. | 5. | 1.5 | 0.5 | 1.5 | U | 0.0 | 0.6 |
| 98 | MD3  | containing 3         | 96 | 03 | 55 | 96 | 58 | 78 | 106 | 951 | 10  | p | 25  | 63  |
| 3  |      |                      | 29 | 54 | 32 | 16 | 69 | 86 | 785 | 966 | 67  |   | 63  | 32  |
|    |      |                      | 2  | 4  | 7  |    | 7  | 5  | 06  | 67  | 85  |   | 87  | 74  |
|    |      |                      |    |    |    |    |    |    |     |     | 06  |   | 43  | 04  |
| 65 | SLC2 | Solute carrier       | 3. | 3. | 3. | 4. | 4. | 4. | 1.6 | 0.7 | 1.6 | U | 0.0 | 0.6 |
| 15 | A3   | family 2             | 68 | 95 | 68 | 76 | 75 | 01 | 696 | 395 | 69  | p | 14  | 63  |
|    |      | (facilitated glucose | 23 | 90 | 23 | 85 | 57 | 80 | 472 | 433 | 64  |   | 14  | 32  |
|    |      | transporter),        | 5  | 4  | 5  | 4  | 6  | 7  | 5   | 33  | 72  |   | 36  | 74  |
|    |      | member 3             |    |    |    |    |    |    |     |     | 5   |   | 69  | 04  |

|    |     |                      |    |    |    |    |    |    |     |     |     |   |     |     |
|----|-----|----------------------|----|----|----|----|----|----|-----|-----|-----|---|-----|-----|
| 91 | MYO | Myozenin 3           | 3. | 4. | 3. | 5. | 5. | 4. | 2.2 | 1.1 | 2.2 | U | 0.0 | 0.6 |
| 97 | Z3  |                      | 81 | 98 | 85 | 70 | 79 | 62 | 291 | 564 | 29  | p | 29  | 63  |
| 7  |     |                      | 83 | 42 | 52 | 42 | 80 | 50 | 236 | 766 | 12  |   | 36  | 32  |
|    |     |                      | 6  | 5  | 9  | 7  | 1  | 5  | 83  | 67  | 36  |   | 28  | 74  |
|    |     |                      |    |    |    |    |    |    |     |     | 83  |   | 13  | 04  |
| 27 | TIN | Tubulointerstitial   | 5. | 4. | 3. | 2. | 2. | 3. | -2. | -1. | 2.3 | D | 0.0 | 0.6 |
| 28 | AG  | nephritis antigen    | 06 | 98 | 30 | 96 | 92 | 68 | 390 | 257 | 90  | o | 35  | 63  |
| 3  |     |                      | 33 | 42 | 19 | 72 | 37 | 7  | 319 | 203 | 31  | w | 29  | 32  |
|    |     |                      | 8  | 5  | 8  | 7  | 3  |    | 277 | 333 | 92  | n | 54  | 74  |
|    |     |                      |    |    |    |    |    |    |     |     | 77  |   | 9   | 04  |
| 22 | PHL | Pleckstrin           | 5. | 5. | 5. | 6. | 7. | 6. | 2.9 | 1.5 | 2.9 | U | 0.0 | 0.6 |
| 82 | DA1 | homology-like        | 50 | 66 | 04 | 94 | 63 | 29 | 310 | 514 | 31  | p | 03  | 63  |
| 2  |     | domain, family A,    | 58 | 26 | 86 | 09 | 27 | 75 | 346 | 1   | 03  |   | 07  | 32  |
|    |     | member 1             | 7  |    | 2  | 5  | 9  | 8  | 03  |     | 46  |   | 90  | 74  |
|    |     |                      |    |    |    |    |    |    |     |     | 03  |   | 35  | 04  |
| 10 | GPC | Glypican 6           | 7. | 7. | 7. | 9. | 8. | 8. | 2.1 | 1.0 | 2.1 | U | 0.0 | 0.6 |
| 08 | 6   |                      | 54 | 59 | 29 | 01 | 20 | 48 | 287 | 899 | 28  | p | 02  | 63  |
| 2  |     |                      | 85 | 84 | 15 | 78 | 24 | 82 | 256 | 9   | 72  |   | 50  | 32  |
|    |     |                      | 1  | 6  | 8  | 2  | 2  | 8  | 1   |     | 56  |   | 48  | 74  |
|    |     |                      |    |    |    |    |    |    |     |     | 1   |   | 36  | 04  |
| 48 | NPH | Nephronophthisis 1   | 5. | 5. | 5. | 4. | 4. | 4. | -1. | -0. | 1.7 | D | 0.0 | 0.6 |
| 67 | P1  | (juvenile)           | 43 | 92 | 12 | 90 | 64 | 63 | 701 | 766 | 01  | o | 12  | 63  |
|    |     |                      | 58 | 35 | 30 | 40 | 82 | 01 | 385 | 71  | 38  | w | 13  | 32  |
|    |     |                      | 8  | 7  | 2  | 2  |    | 2  | 425 |     | 54  | n | 10  | 74  |
|    |     |                      |    |    |    |    |    |    |     |     | 25  |   | 44  | 04  |
| 38 | KLR | Killer cell          | 4. | 5. | 5. | 4. | 3. | 4. | -1. | -0. | 1.9 | D | 0.0 | 0.6 |
| 21 | C1  | lectin-like receptor | 71 | 20 | 70 | 62 | 76 | 40 | 925 | 945 | 25  | o | 20  | 63  |
|    |     | subfamily C,         | 45 | 65 | 24 | 74 | 04 | 00 | 469 | 21  | 46  | w | 16  | 32  |
|    |     | member 1             | 9  |    | 8  |    | 6  | 8  | 139 |     | 91  | n | 58  | 74  |



|    |      |                       |    |    |    |    |    |    |     |     |     |   |     |     |
|----|------|-----------------------|----|----|----|----|----|----|-----|-----|-----|---|-----|-----|
|    |      |                       |    |    |    |    |    |    |     |     | 39  |   | 71  | 04  |
| 94 | ORM  | ORMDL                 | 6. | 6. | 6. | 5. | 5. | 6. | -1. | -0. | 1.7 | D | 0.0 | 0.6 |
| 10 | DL1  | sphingolipid          | 46 | 28 | 36 | 40 | 26 | 05 | 735 | 795 | 35  | o | 11  | 63  |
| 1  |      | biosynthesis          | 09 | 43 | 24 | 21 | 00 | 82 | 987 | 756 | 98  | w | 52  | 32  |
|    |      | regulator 1           | 6  | 7  |    | 4  | 4  | 8  | 629 | 667 | 76  | n | 16  | 74  |
|    |      |                       |    |    |    |    |    |    |     |     | 29  |   | 28  | 04  |
| 10 | FST  | Follistatin           | 4. | 4. | 4. | 5. | 5. | 5. | 1.8 | 0.8 | 1.8 | U | 0.0 | 0.6 |
| 46 |      |                       | 85 | 62 | 96 | 88 | 47 | 73 | 414 | 808 | 41  | p | 01  | 63  |
| 8  |      |                       | 79 | 98 | 89 | 93 | 83 | 16 | 854 | 7   | 48  |   | 58  | 32  |
|    |      |                       | 1  | 8  | 8  | 4  | 6  | 8  | 52  |     | 54  |   | 48  | 74  |
|    |      |                       |    |    |    |    |    |    |     |     | 52  |   | 84  | 04  |
| 10 | GIM  | GIMAP1-GIMAP5         | 5. | 5. | 5. | 7. | 6. | 6. | 2.3 | 1.2 | 2.3 | U | 0.0 | 0.6 |
| 05 | AP1- | readthrough           | 00 | 73 | 83 | 57 | 65 | 05 | 564 | 365 | 56  | p | 19  | 63  |
| 27 | GIM  |                       | 17 | 93 | 87 | 28 | 78 | 89 | 036 | 866 | 40  |   | 79  | 32  |
| 94 | AP5  |                       | 8  |    | 9  | 4  | 1  | 8  | 07  | 67  | 36  |   | 49  | 74  |
| 9  |      |                       |    |    |    |    |    |    |     |     | 07  |   | 8   | 04  |
| 10 | LOC  | Hepatocyte growth     | 7. | 5. | 6. | 4. | 4. | 6. | -3. | -1. | 3.1 | D | 0.0 | 0.6 |
| 53 | 1053 | factor-like protein   | 83 | 90 | 13 | 57 | 20 | 19 | 104 | 634 | 04  | o | 44  | 63  |
| 69 | 6925 |                       | 79 | 32 | 64 | 05 | 38 | 99 | 670 | 44  | 67  | w | 13  | 32  |
| 25 | 2    |                       | 7  | 9  |    | 6  | 3  | 5  | 15  |     | 01  | n | 69  | 74  |
| 2  |      |                       |    |    |    |    |    |    |     |     | 5   |   | 92  | 04  |
| 57 | ATP8 | Atpase,               | 5. | 6. | 6. | 7. | 6. | 6. | 2.3 | 1.2 | 2.3 | U | 0.0 | 0.6 |
| 19 | B2   | aminophospholipid     | 17 | 20 | 28 | 99 | 85 | 42 | 071 | 061 | 07  | p | 35  | 63  |
| 8  |      | transporter, class I, | 29 | 08 | 16 | 36 | 55 | 46 | 790 | 3   | 17  |   | 90  | 32  |
|    |      | type 8B, member 2     | 7  | 3  | 3  | 6  | 5  | 1  | 99  |     | 90  |   | 82  | 74  |
|    |      |                       |    |    |    |    |    |    |     |     | 99  |   | 4   | 04  |
| 11 | FMN  | Formin like 2         | 6. | 7. | 6. | 8. | 7. | 7. | 2.2 | 1.2 | 2.2 | U | 0.0 | 0.6 |
| 47 | L2   |                       | 37 | 16 | 52 | 89 | 59 | 18 | 985 | 007 | 98  | p | 32  | 63  |
| 93 |      |                       | 40 | 79 | 31 | 22 | 04 | 45 | 169 | 033 | 51  |   | 57  | 32  |

|    |      |                     |    |    |    |    |    |    |     |     |     |   |     |     |
|----|------|---------------------|----|----|----|----|----|----|-----|-----|-----|---|-----|-----|
|    |      |                     | 8  | 7  | 2  | 8  | 1  | 9  | 95  | 33  | 69  |   | 91  | 74  |
|    |      |                     |    |    |    |    |    |    |     |     | 95  |   | 45  | 04  |
| 10 | RAM  | Receptor (G         | 5. | 5. | 5. | 6. | 7. | 5. | 2.0 | 1.0 | 2.0 | U | 0.0 | 0.6 |
| 26 | P2   | protein-coupled)    | 04 | 04 | 38 | 36 | 06 | 19 | 747 | 529 | 74  | p | 48  | 63  |
| 6  |      | activity modifying  | 84 | 25 | 10 | 62 | 91 | 53 | 344 | 266 | 73  |   | 97  | 32  |
|    |      | protein 2           | 2  | 1  | 9  | 5  | 6  | 9  | 1   | 67  | 44  |   | 30  | 74  |
|    |      |                     |    |    |    |    |    |    |     |     | 1   |   | 69  | 04  |
| 26 | GEM  | GTP binding         | 3. | 5. | 4. | 7. | 6. | 5. | 4.6 | 2.2 | 4.6 | U | 0.0 | 0.6 |
| 69 |      | protein             | 48 | 05 | 34 | 81 | 11 | 59 | 391 | 138 | 39  | p | 09  | 63  |
|    |      | overexpressed in    | 17 | 58 | 96 | 14 | 99 | 74 | 912 | 733 | 19  |   | 41  | 32  |
|    |      | skeletal muscle     | 8  | 4  | 3  | 2  | 7  | 8  | 85  | 33  | 12  |   | 72  | 74  |
|    |      |                     |    |    |    |    |    |    |     |     | 85  |   | 92  | 04  |
| 27 | AMP  | Amphiphysin         | 3. | 4. | 3. | 5. | 4. | 3. | 1.9 | 0.9 | 1.9 | U | 0.0 | 0.6 |
| 3  | H    |                     | 19 | 31 | 56 | 22 | 71 | 97 | 288 | 477 | 28  | p | 43  | 63  |
|    |      |                     | 47 | 53 | 34 | 78 | 30 | 58 | 219 | 2   | 82  |   | 94  | 32  |
|    |      |                     | 7  | 2  | 4  | 3  | 4  | 2  | 85  |     | 19  |   | 58  | 74  |
|    |      |                     |    |    |    |    |    |    |     |     | 85  |   | 87  | 04  |
| 57 | SCU  | Signal peptide,     | 5. | 6. | 5. | 7. | 6. | 7. | 2.3 | 1.2 | 2.3 | U | 0.0 | 0.6 |
| 75 | BE2  | CUB domain,         | 26 | 66 | 56 | 56 | 40 | 25 | 707 | 453 | 70  | p | 24  | 63  |
| 8  |      | EGF-like 2          | 58 | 11 | 63 | 89 | 30 | 73 | 003 | 133 | 70  |   | 70  | 32  |
|    |      |                     | 6  | 9  | 2  | 8  | 1  | 2  | 69  | 33  | 03  |   | 56  | 74  |
|    |      |                     |    |    |    |    |    |    |     |     | 69  |   | 57  | 04  |
| 15 | CYP  | Cytochrome P450,    | 6. | 5. | 5. | 5. | 4. | 4. | -1. | -0. | 1.8 | D | 0.0 | 0.6 |
| 65 | 2D6  | family 2, subfamily | 31 | 89 | 46 | 44 | 70 | 76 | 896 | 923 | 96  | o | 15  | 63  |
|    |      | D, polypeptide 6    | 07 |    | 89 | 01 | 02 | 00 | 137 | 063 | 13  | w | 23  | 32  |
|    |      |                     | 3  |    | 6  | 5  | 8  | 7  | 168 | 333 | 71  | n | 86  | 74  |
|    |      |                     |    |    |    |    |    |    |     |     | 68  |   | 05  | 04  |
| 81 | MAP  | Microtubule         | 5. | 4. | 5. | 6. | 5. | 5. | 1.6 | 0.7 | 1.6 | U | 0.0 | 0.6 |
| 63 | 1LC3 | associated protein  | 17 | 66 | 48 | 08 | 57 | 93 | 896 | 567 | 89  | p | 19  | 63  |

|               |                  |                                                           |                     |                     |                     |                     |                     |                     |                          |                         |                             |                  |                             |                             |
|---------------|------------------|-----------------------------------------------------------|---------------------|---------------------|---------------------|---------------------|---------------------|---------------------|--------------------------|-------------------------|-----------------------------|------------------|-----------------------------|-----------------------------|
| 1             | B                | 1 light chain 3 $\beta$                                   | 98<br>4             | 63<br>4             | 06<br>3             | 72<br>7             | 40<br>5             | 57                  | 643<br>28                | 366<br>67               | 66<br>43<br>28              |                  | 84<br>92<br>47              | 32<br>74<br>04              |
| 21<br>14      | ETS2             | V-ets avian erythroblastosis virus E26 oncogene homolog 2 | 7.<br>38<br>77<br>7 | 6.<br>59<br>45<br>7 | 7.<br>00<br>59<br>1 | 7.<br>85<br>71<br>6 | 8.<br>18<br>42<br>1 | 7.<br>33<br>50<br>9 | 1.7<br>363<br>647<br>02  | 0.7<br>960<br>7         | 1.7<br>36<br>36<br>47<br>02 | U<br>p           | 0.0<br>28<br>48<br>44<br>93 | 0.6<br>63<br>32<br>74<br>04 |
| 79<br>40      | LST1             | Leukocyte specific transcript 1                           | 6.<br>61<br>01<br>7 | 7.<br>53<br>54<br>7 | 7.<br>17<br>01<br>9 | 8.<br>24<br>64<br>5 | 7.<br>68<br>38<br>5 | 7.<br>53<br>63<br>5 | 1.6<br>436<br>730<br>25  | 0.7<br>169<br>233<br>33 | 1.6<br>43<br>67<br>30<br>25 | U<br>p           | 0.0<br>45<br>33<br>26<br>44 | 0.6<br>63<br>32<br>74<br>04 |
| 51<br>75<br>1 | HIG<br>D1B       | HIG1 hypoxia inducible domain family member 1B            | 5.<br>03<br>00<br>9 | 5.<br>66<br>51<br>2 | 5.<br>18<br>13      | 6.<br>58<br>05<br>8 | 7.<br>06<br>10<br>2 | 5.<br>78<br>80<br>8 | 2.2<br>726<br>728<br>12  | 1.1<br>843<br>9         | 2.2<br>72<br>67<br>28<br>12 | U<br>p           | 0.0<br>10<br>77<br>97<br>04 | 0.6<br>63<br>32<br>74<br>04 |
| 53<br>5       | ATP6<br>V0A<br>1 | Atpase, H <sup>+</sup> transporting, lysosomal subunit a1 | 9.<br>52<br>13<br>2 | 9.<br>27<br>29<br>1 | 8.<br>82<br>74      | 8.<br>40<br>22<br>7 | 8.<br>37<br>34<br>9 | 8.<br>66<br>00<br>9 | -1.<br>657<br>087<br>748 | -0.<br>728<br>65        | 1.6<br>57<br>08<br>77<br>48 | D<br>o<br>w<br>n | 0.0<br>11<br>69<br>92<br>73 | 0.6<br>63<br>32<br>74<br>04 |
| 94            | ACV<br>RL1       | Activin A receptor type II                                | 5.<br>04<br>85<br>5 | 5.<br>08<br>45<br>2 | 5.<br>11<br>73<br>7 | 6.<br>13<br>06<br>2 | 6.<br>35<br>52<br>3 | 5.<br>19<br>80<br>1 | 1.7<br>545<br>973<br>56  | 0.8<br>111<br>4         | 1.7<br>54<br>59<br>73<br>56 | U<br>p           | 0.0<br>30<br>36<br>94<br>97 | 0.6<br>63<br>32<br>74<br>04 |
| 25            | ADG              | Adhesion G                                                | 6.                  | 7.                  | 6.                  | 9.                  | 8.                  | 8.                  | 3.1                      | 1.6                     | 3.1                         | U                | 0.0                         | 0.6                         |

|       |             |                                                              |                      |                     |                     |                      |                      |                      |                          |                  |                             |                  |                             |                             |
|-------|-------------|--------------------------------------------------------------|----------------------|---------------------|---------------------|----------------------|----------------------|----------------------|--------------------------|------------------|-----------------------------|------------------|-----------------------------|-----------------------------|
| 960   | RA2         | protein-coupled receptor A2                                  | 32<br>63<br>2        | 95<br>47<br>5       | 85<br>51<br>4       | 42<br>43<br>7        | 70<br>23<br>7        | 03<br>02             | 900<br>447<br>6          | 735<br>766<br>67 | 90<br>04<br>47<br>6         | p                | 11<br>42<br>77<br>2         | 63<br>32<br>74<br>04        |
| 7512  | XPN<br>PEP2 | X-prolyl aminopeptidase (aminopeptidase P) 2, membrane-bound | 4.<br>08<br>45<br>9  | 4.<br>38<br>41<br>9 | 4.<br>56<br>57<br>1 | 3.<br>59<br>77<br>3  | 3.<br>80<br>92<br>8  | 3.<br>63<br>10<br>1  | -1.<br>586<br>106<br>89  | -0.<br>665<br>49 | 1.5<br>86<br>10<br>68<br>9  | D<br>o<br>w<br>n | 0.0<br>03<br>99<br>17<br>82 | 0.6<br>63<br>32<br>74<br>04 |
| 6591  | SNAI<br>2   | Snail family zinc finger 2                                   | 4.<br>35<br>20<br>4  | 4.<br>93<br>01<br>4 | 4.<br>47<br>39      | 6.<br>70<br>92<br>7  | 7.<br>45<br>37<br>2  | 5.<br>74<br>16<br>5  | 4.1<br>396<br>821<br>5   | 2.0<br>495<br>2  | 4.1<br>39<br>68<br>21<br>5  | U<br>p           | 0.0<br>01<br>77<br>88<br>8  | 0.6<br>63<br>32<br>74<br>04 |
| 81575 | APO<br>LD1  | Apolipoprotein L domain containing 1                         | 4.<br>66<br>5        | 4.<br>32<br>52<br>4 | 4.<br>64<br>12<br>4 | 7.<br>99<br>58<br>5  | 9.<br>99<br>79<br>3  | 5.<br>88<br>61<br>8  | 10.<br>674<br>969<br>18  | 3.4<br>161<br>6  | 10.<br>67<br>49<br>69<br>18 | U<br>p           | 0.0<br>07<br>14<br>59<br>05 | 0.6<br>63<br>32<br>74<br>04 |
| 5796  | PTP<br>RK   | Protein tyrosine phosphatase, receptor type, K               | 11<br>.8<br>18<br>51 | 11<br>.4<br>46<br>6 | 11<br>.8<br>15<br>1 | 10<br>.5<br>18<br>86 | 11<br>.1<br>46<br>38 | 11<br>.2<br>72<br>61 | -1.<br>640<br>482<br>268 | -0.<br>714<br>12 | 1.6<br>40<br>48<br>22<br>68 | D<br>o<br>w<br>n | 0.0<br>19<br>31<br>67<br>68 | 0.6<br>63<br>32<br>74<br>04 |
| 2701  | GJA4        | Gap junction protein $\alpha$ 4                              | 3.<br>70<br>33       | 3.<br>78<br>62<br>7 | 4.<br>07<br>60<br>1 | 5.<br>52<br>59<br>9  | 5.<br>88<br>41<br>2  | 4.<br>20<br>33<br>7  | 2.5<br>478<br>847<br>13  | 1.3<br>493       | 2.5<br>47<br>88<br>47<br>13 | U<br>p           | 0.0<br>13<br>65<br>28<br>77 | 0.6<br>63<br>32<br>74<br>04 |

|          |                          |                                                                             |                     |                     |                     |                     |                     |                     |                          |                              |                             |                  |                             |                             |
|----------|--------------------------|-----------------------------------------------------------------------------|---------------------|---------------------|---------------------|---------------------|---------------------|---------------------|--------------------------|------------------------------|-----------------------------|------------------|-----------------------------|-----------------------------|
| 10060    | ABC<br>C9                | ATP binding<br>cassette subfamily<br>C member 9                             | 4.<br>41<br>54<br>9 | 5.<br>45<br>82<br>2 | 5.<br>06<br>91<br>4 | 6.<br>56<br>49<br>2 | 6.<br>56<br>46<br>7 | 5.<br>39<br>02<br>9 | 2.2<br>852<br>362<br>71  | 1.1<br>923<br>433<br>33      | 2.2<br>85<br>23<br>62<br>71 | U<br>p           | 0.0<br>20<br>05<br>69<br>25 | 0.6<br>63<br>32<br>74<br>04 |
| 196743   | PAO<br>X                 | Polyamine oxidase<br>(exo-N4-amino)                                         | 7.<br>42<br>06<br>9 | 7.<br>47<br>00<br>8 | 6.<br>91<br>47<br>9 | 6.<br>21<br>16<br>9 | 5.<br>91<br>00<br>3 | 6.<br>59<br>13<br>2 | -2.<br>043<br>213<br>553 | -1.<br>030<br>84<br>35<br>53 | 2.0<br>43<br>21<br>35<br>53 | D<br>o<br>w<br>n | 0.0<br>03<br>87<br>91<br>67 | 0.6<br>63<br>32<br>74<br>04 |
| 3790     | KCN<br>S3                | Potassium<br>voltage-gated<br>channel, modifier<br>subfamily S,<br>member 3 | 3.<br>13<br>61<br>1 | 3.<br>88<br>77<br>2 | 3.<br>60<br>37<br>4 | 6.<br>34<br>71<br>8 | 5.<br>80<br>81<br>6 | 4.<br>11<br>91<br>6 | 3.6<br>865<br>977<br>23  | 1.8<br>822<br>9<br>77<br>23  | 3.6<br>86<br>59<br>77<br>23 | U<br>p           | 0.0<br>10<br>69<br>86<br>33 | 0.6<br>63<br>32<br>74<br>04 |
| 11130    | ZWI<br>NT                | ZW10 interacting<br>kinetochore protein                                     | 5.<br>74<br>10<br>5 | 5.<br>99<br>01<br>5 | 6.<br>24<br>00<br>1 | 7.<br>08<br>74<br>1 | 7.<br>71<br>52<br>1 | 6.<br>07<br>62<br>1 | 1.9<br>577<br>592<br>08  | 0.9<br>692<br>033<br>33      | 1.9<br>57<br>75<br>92<br>08 | U<br>p           | 0.0<br>46<br>43<br>67<br>79 | 0.6<br>63<br>32<br>74<br>04 |
| 4172     | MC<br>M3                 | Minichromosome<br>maintenance<br>complex<br>component 3                     | 6.<br>09<br>18<br>5 | 6.<br>03<br>02<br>2 | 6.<br>38<br>77<br>4 | 7.<br>00<br>90<br>4 | 7.<br>18<br>06<br>3 | 6.<br>46<br>53<br>9 | 1.6<br>415<br>932<br>08  | 0.7<br>150<br>966<br>67      | 1.6<br>41<br>59<br>32<br>08 | U<br>p           | 0.0<br>16<br>99<br>02<br>01 | 0.6<br>63<br>32<br>74<br>04 |
| 10272511 | LOC<br>1027<br>2511<br>7 | Rho guanine<br>nucleotide<br>exchange factor<br>5-like                      | 7.<br>75<br>23<br>1 | 7.<br>05<br>24<br>3 | 6.<br>95<br>19<br>3 | 6.<br>54<br>29<br>9 | 6.<br>44<br>79<br>8 | 6.<br>87<br>70<br>8 | -1.<br>547<br>089<br>507 | -0.<br>629<br>556<br>667     | 1.5<br>47<br>08<br>95       | D<br>o<br>w<br>n | 0.0<br>42<br>87<br>63       | 0.6<br>63<br>32<br>74       |

|                |            |                                                       |                     |                     |                     |                     |                     |                     |                          |                          |                             |                  |                             |                             |    |
|----------------|------------|-------------------------------------------------------|---------------------|---------------------|---------------------|---------------------|---------------------|---------------------|--------------------------|--------------------------|-----------------------------|------------------|-----------------------------|-----------------------------|----|
| 7              |            |                                                       |                     |                     |                     |                     |                     |                     |                          |                          |                             | 07               |                             | 89                          | 04 |
| 18<br>43       | DUS<br>P1  | Dual specificity<br>phosphatase 1                     | 6.<br>52<br>14<br>3 | 6.<br>06<br>26<br>7 | 7.<br>02<br>79<br>7 | 8.<br>81<br>12<br>1 | 9.<br>92<br>79<br>4 | 8.<br>40<br>72<br>3 | 5.7<br>018<br>760<br>07  | 2.5<br>114<br>366<br>67  | 5.7<br>01<br>87<br>60<br>07 | U<br>p           | 0.0<br>00<br>59<br>50<br>47 | 0.6<br>63<br>32<br>74<br>04 |    |
| 65<br>26<br>7  | WN<br>K3   | WNK lysine<br>deficient protein<br>kinase 3           | 5.<br>26<br>57<br>8 | 5.<br>34<br>67<br>1 | 5.<br>49<br>29      | 4.<br>12<br>70<br>3 | 4.<br>54<br>14      | 5.<br>10<br>35<br>5 | -1.<br>714<br>518<br>336 | -0.<br>777<br>803<br>333 | 1.7<br>14<br>51<br>83<br>36 | D<br>o<br>w<br>n | 0.0<br>18<br>17<br>85<br>95 | 0.6<br>63<br>32<br>74<br>04 |    |
| 28<br>33<br>77 | SPR<br>YD4 | SPRY domain<br>containing 4                           | 6.<br>66<br>73      | 6.<br>95<br>28      | 6.<br>66<br>01      | 5.<br>67<br>11<br>9 | 5.<br>88<br>19<br>6 | 6.<br>61<br>68<br>3 | -1.<br>628<br>394<br>214 | -0.<br>703<br>45         | 1.6<br>28<br>39<br>42<br>14 | D<br>o<br>w<br>n | 0.0<br>33<br>81<br>20<br>98 | 0.6<br>63<br>32<br>74<br>04 |    |
| 12<br>66<br>69 | SHE        | Src homology 2<br>domain containing<br>E              | 3.<br>90<br>46<br>6 | 4.<br>47<br>65      | 4.<br>60<br>34      | 5.<br>05<br>80<br>4 | 5.<br>57<br>25<br>2 | 4.<br>60<br>78<br>8 | 1.6<br>833<br>011<br>84  | 0.7<br>512<br>933<br>33  | 1.6<br>83<br>30<br>11<br>84 | U<br>p           | 0.0<br>37<br>04<br>07<br>76 | 0.6<br>63<br>32<br>74<br>04 |    |
| 54<br>92<br>8  | IMP<br>AD1 | Inositol<br>monophosphatase<br>domain containing<br>1 | 5.<br>05<br>62<br>5 | 4.<br>46<br>19<br>4 | 5.<br>05<br>34<br>8 | 5.<br>54<br>71<br>5 | 5.<br>75<br>18      | 5.<br>21<br>00<br>2 | 1.5<br>645<br>704<br>98  | 0.6<br>457<br>666<br>67  | 1.5<br>64<br>57<br>04<br>98 | U<br>p           | 0.0<br>26<br>88<br>22<br>3  | 0.6<br>63<br>32<br>74<br>04 |    |
| 11<br>31<br>89 | CHS<br>T14 | Carbohydrate<br>(N-acetylgalactosa<br>mine 4-0)       | 6.<br>79<br>05      | 7.<br>03<br>36      | 7.<br>34<br>52      | 8.<br>19<br>35      | 7.<br>58<br>71      | 7.<br>31<br>30      | 1.5<br>598<br>961        | 0.6<br>414<br>5          | 1.5<br>59<br>89             | U<br>p           | 0.0<br>48<br>49             | 0.6<br>63<br>32             |    |

|    |      |                      |    |    |    |    |    |    |     |     |     |   |     |     |
|----|------|----------------------|----|----|----|----|----|----|-----|-----|-----|---|-----|-----|
|    |      | sulfotransferase 14  |    | 4  | 6  | 3  | 8  | 4  | 66  |     | 61  |   | 13  | 74  |
|    |      |                      |    |    |    |    |    |    |     |     | 66  |   | 53  | 04  |
| 26 | MOX  | Monooxygenase,       | 4. | 4. | 4. | 7. | 5. | 4. | 2.4 | 1.3 | 2.4 | U | 0.0 | 0.6 |
| 00 | D1   | DBH-like 1           | 47 | 54 | 28 | 07 | 31 | 82 | 688 | 038 | 68  | p | 44  | 63  |
| 2  |      |                      | 78 | 33 | 03 | 32 | 49 | 48 | 570 | 433 | 85  |   | 84  | 32  |
|    |      |                      | 1  |    | 6  | 9  | 1  |    | 98  | 33  | 70  |   | 63  | 74  |
|    |      |                      |    |    |    |    |    |    |     |     | 98  |   | 36  | 04  |
| 12 | SGS  | Small G protein      | 5. | 4. | 4. | 4. | 4. | 4. | -1. | -0. | 1.6 | D | 0.0 | 0.6 |
| 90 | M1   | signaling            | 32 | 89 | 48 | 13 | 02 | 30 | 679 | 748 | 79  | o | 12  | 63  |
| 49 |      | modulator 1          | 76 | 26 | 82 | 36 | 74 | 21 | 936 | 406 | 93  | w | 94  | 32  |
|    |      |                      | 9  |    | 2  | 8  | 5  | 6  | 459 | 667 | 64  | n | 70  | 74  |
|    |      |                      |    |    |    |    |    |    |     |     | 59  |   | 13  | 04  |
| 63 | TNN  | Tenascin N           | 3. | 4. | 3. | 5. | 4. | 4. | 2.2 | 1.1 | 2.2 | U | 0.0 | 0.6 |
| 92 |      |                      | 78 | 06 | 64 | 93 | 35 | 68 | 328 | 588 | 32  | p | 21  | 63  |
| 3  |      |                      | 78 | 91 | 64 | 73 | 91 | 35 | 247 | 7   | 82  |   | 36  | 32  |
|    |      |                      |    | 3  | 7  | 9  |    | 2  | 17  |     | 47  |   | 52  | 74  |
|    |      |                      |    |    |    |    |    |    |     |     | 17  |   | 9   | 04  |
| 16 | ZFP  | Zinc finger protein, | 9. | 8. | 8. | 7. | 7. | 8. | -2. | -1. | 2.0 | D | 0.0 | 0.6 |
| 18 | M1   | FOG family           | 10 | 84 | 91 | 84 | 61 | 34 | 025 | 018 | 25  | o | 02  | 63  |
| 82 |      | member 1             | 96 | 17 | 71 | 56 | 93 | 83 | 671 | 4   | 67  | w | 40  | 32  |
|    |      |                      | 3  | 8  | 6  | 9  | 5  | 3  | 172 |     | 11  | n | 95  | 74  |
|    |      |                      |    |    |    |    |    |    |     |     | 72  |   | 8   | 04  |
| 19 | EEF1 | Eukaryotic           | 10 | 9. | 10 | 11 | 11 | 11 | 1.7 | 0.8 | 1.7 | U | 0.0 | 0.6 |
| 37 | G    | translation          | .7 | 98 | .9 | .7 | .0 | .2 | 644 | 191 | 64  | p | 30  | 63  |
|    |      | elongation factor 1  | 30 | 15 | 36 | 88 | 56 | 60 | 150 | 9   | 41  |   | 311 | 32  |
|    |      | $\gamma$             | 06 | 3  | 37 | 37 | 84 | 32 | 85  |     | 50  |   | 15  | 74  |
|    |      |                      |    |    |    |    |    |    |     |     | 85  |   | 3   | 04  |
| 98 | LRB  | LPS-responsive       | 8. | 7. | 8. | 7. | 7. | 7. | -1. | -0. | 1.5 | D | 0.0 | 0.6 |
| 7  | A    | vesicle trafficking, | 35 | 97 | 38 | 29 | 58 | 95 | 543 | 626 | 43  | o | 26  | 63  |

|                |                         |                                                                           |                     |                     |                     |                     |                     |                     |                          |                          |                             |                  |                             |                             |
|----------------|-------------------------|---------------------------------------------------------------------------|---------------------|---------------------|---------------------|---------------------|---------------------|---------------------|--------------------------|--------------------------|-----------------------------|------------------|-----------------------------|-----------------------------|
|                |                         | beach and anchor<br>containing                                            | 37<br>6             | 23<br>4             | 91<br>1             | 59<br>4             | 54<br>4             | 5                   | 576<br>159               | 276<br>667               | 57<br>61<br>59              | w<br>n           | 09<br>81<br>7               | 32<br>74<br>04              |
| 15<br>32<br>01 | SLC3<br>6A2             | Solute carrier<br>family<br>(proton/amino acid<br>symporter),<br>member 2 | 3.<br>95<br>39<br>1 | 3.<br>91<br>86<br>6 | 3.<br>76<br>49<br>6 | 2.<br>68<br>18<br>6 | 2.<br>92<br>81<br>6 | 3.<br>48<br>66<br>5 | -1.<br>798<br>698<br>441 | -0.<br>846<br>953<br>333 | 1.7<br>98<br>69<br>84<br>41 | D<br>o<br>w<br>n | 0.0<br>04<br>65<br>16<br>63 | 0.6<br>63<br>32<br>74<br>04 |
| 28<br>85<br>0  | IGK<br>V10<br>R22-<br>5 | Immunoglobulin $\kappa$<br>variable 1/OR22-5<br>(pseudogene)              | 5.<br>42<br>99<br>9 | 4.<br>89<br>86<br>3 | 5.<br>48<br>02<br>1 | 6.<br>01<br>56<br>4 | 9.<br>11<br>58<br>5 | 8.<br>90<br>33<br>7 | 6.6<br>900<br>175<br>71  | 2.7<br>420<br>1<br>71    | 6.6<br>90<br>01<br>75<br>71 | U<br>p           | 0.0<br>09<br>79<br>54<br>34 | 0.6<br>63<br>32<br>74<br>04 |
| 27<br>33<br>3  | GOL<br>IM4              | Golgi integral<br>membrane protein<br>4                                   | 7.<br>46<br>90<br>6 | 7.<br>76<br>32<br>4 | 7.<br>29<br>06<br>5 | 6.<br>57<br>99<br>4 | 6.<br>66<br>72<br>8 | 7.<br>32<br>05<br>4 | -1.<br>571<br>050<br>984 | -0.<br>651<br>73<br>09   | 1.5<br>71<br>05<br>09<br>84 | D<br>o<br>w<br>n | 0.0<br>33<br>55<br>65<br>55 | 0.6<br>63<br>32<br>74<br>04 |
| 54<br>46<br>3  | FAM<br>134B             | Family with<br>sequence similarity<br>134 member B                        | 8.<br>70<br>74<br>2 | 9.<br>18<br>65<br>3 | 8.<br>89<br>37<br>1 | 8.<br>07<br>55<br>3 | 8.<br>63<br>37<br>7 | 8.<br>13<br>95<br>6 | -1.<br>565<br>112<br>831 | -0.<br>646<br>266<br>667 | 1.5<br>65<br>11<br>28<br>31 | D<br>o<br>w<br>n | 0.0<br>20<br>61<br>50<br>28 | 0.6<br>63<br>32<br>74<br>04 |
| 19<br>73       | EIF4<br>A1              | Eukaryotic<br>translation<br>initiation factor<br>4A1                     | 6.<br>08<br>82      | 5.<br>82<br>79<br>5 | 5.<br>92<br>62<br>3 | 6.<br>54<br>60<br>6 | 7.<br>17<br>33<br>7 | 6.<br>22<br>13<br>2 | 1.6<br>238<br>931<br>03  | 0.6<br>994<br>566<br>67  | 1.6<br>23<br>89<br>31<br>03 | U<br>p           | 0.0<br>30<br>59<br>21<br>41 | 0.6<br>63<br>32<br>74<br>04 |
| 20             | FBX                     | F-box protein 15                                                          | 5.                  | 4.                  | 5.                  | 4.                  | 4.                  | 4.                  | -1.                      | -0.                      | 1.6                         | D                | 0.0                         | 0.6                         |



|    |      |                    |    |    |    |    |    |    |     |     |     |   |     |     |
|----|------|--------------------|----|----|----|----|----|----|-----|-----|-----|---|-----|-----|
| 14 | O15  |                    | 59 | 68 | 08 | 30 | 31 | 64 | 625 | 700 | 25  | o | 26  | 63  |
| 56 |      |                    | 44 | 40 | 79 | 31 | 39 | 72 | 255 | 666 | 25  | w | 03  | 32  |
|    |      |                    | 2  | 3  | 5  | 8  | 3  | 9  | 647 | 667 | 56  | n | 90  | 74  |
|    |      |                    |    |    |    |    |    |    |     |     | 47  |   | 36  | 04  |
| 65 | SLC7 | Solute carrier     | 4. | 5. | 5. | 4. | 4. | 4. | -1. | -0. | 1.7 | D | 0.0 | 0.6 |
| 41 | A1   | family 7 (cationic | 94 | 17 | 10 | 00 | 33 | 45 | 748 | 806 | 48  | o | 01  | 63  |
|    |      | amino acid         | 21 | 21 | 04 | 00 | 92 | 60 | 926 | 47  | 92  | w | 92  | 32  |
|    |      | transporter, y+    | 7  | 8  | 9  | 9  | 5  | 9  | 912 |     | 69  | n | 19  | 74  |
|    |      | system), member 1  |    |    |    |    |    |    |     |     | 12  |   | 47  | 04  |
| 14 | TME  | Transmembrane      | 4. | 4. | 4. | 6. | 4. | 5. | 1.8 | 0.9 | 1.8 | U | 0.0 | 0.6 |
| 85 | M56  | protein 56         | 56 | 80 | 64 | 18 | 92 | 66 | 937 | 212 | 93  | p | 20  | 63  |
| 34 |      |                    | 47 | 78 | 72 | 92 | 62 | 81 | 772 | 666 | 77  |   | 85  | 32  |
|    |      |                    | 1  | 6  | 9  | 6  | 5  | 5  | 74  | 67  | 72  |   | 02  | 74  |
|    |      |                    |    |    |    |    |    |    |     |     | 74  |   | 47  | 04  |
| 38 | L1C  | L1 cell adhesion   | 5. | 4. | 5. | 6. | 7. | 5. | 2.2 | 1.1 | 2.2 | U | 0.0 | 0.6 |
| 97 | AM   | molecule           | 44 | 99 | 64 | 25 | 42 | 87 | 310 | 577 | 31  | p | 24  | 63  |
|    |      |                    | 3  | 17 | 47 | 86 | 01 | 38 | 198 | 033 | 01  |   | 17  | 32  |
|    |      |                    |    | 4  | 2  | 3  | 1  | 3  | 25  | 33  | 98  |   | 25  | 74  |
|    |      |                    |    |    |    |    |    |    |     |     | 25  |   | 77  | 04  |
| 11 | C12o | Chromosome 12      | 9. | 9. | 10 | 10 | 10 | 10 | 1.5 | 0.6 | 1.5 | U | 0.0 | 0.6 |
| 32 | rf57 | open reading frame | 45 | 67 | .1 | .5 | .4 | .2 | 912 | 702 | 91  | p | 16  | 63  |
| 46 |      | 57                 | 47 | 06 | 18 | 82 | 59 | 13 | 935 |     | 29  |   | 49  | 32  |
|    |      |                    | 7  | 2  | 36 | 11 | 07 | 17 | 52  |     | 35  |   | 15  | 74  |
|    |      |                    |    |    |    |    |    |    |     |     | 52  |   | 61  | 04  |
| 54 | POD  | Podocalyxin-like   | 5. | 6. | 6. | 8. | 8. | 6. | 3.4 | 1.7 | 3.4 | U | 0.0 | 0.6 |
| 20 | XL   |                    | 70 | 09 | 50 | 50 | 86 | 31 | 715 | 955 | 71  | p | 26  | 63  |
|    |      |                    | 01 | 44 | 33 | 10 | 93 | 42 | 100 | 633 | 51  |   | 65  | 32  |
|    |      |                    | 6  | 9  | 1  | 5  | 3  | 7  | 15  | 33  | 00  |   | 38  | 74  |
|    |      |                    |    |    |    |    |    |    |     |     | 15  |   | 7   | 04  |

|                |                |                                                                            |                     |                     |                     |                     |                     |                     |                          |                              |                             |                  |                             |                             |
|----------------|----------------|----------------------------------------------------------------------------|---------------------|---------------------|---------------------|---------------------|---------------------|---------------------|--------------------------|------------------------------|-----------------------------|------------------|-----------------------------|-----------------------------|
| 85<br>02<br>7  | SMI<br>M3<br>3 | Small integral<br>membrane protein                                         | 5.<br>54<br>79<br>5 | 5.<br>34<br>38<br>9 | 5.<br>67<br>65      | 6.<br>48<br>8       | 7.<br>61<br>56<br>3 | 5.<br>85<br>46<br>4 | 2.1<br>885<br>520<br>06  | 1.1<br>299<br>766<br>67      | 2.1<br>88<br>55<br>20<br>06 | U<br>p           | 0.0<br>30<br>80<br>56<br>96 | 0.6<br>63<br>32<br>74<br>04 |
| 86<br>04       | SLC2<br>5A12   | Solute carrier<br>family 25<br>(aspartate/glutamate carrier), member<br>12 | 3.<br>51<br>25<br>8 | 4.<br>20<br>35<br>8 | 3.<br>83<br>73<br>5 | 5.<br>57<br>04<br>4 | 4.<br>38<br>75<br>4 | 4.<br>32<br>16<br>1 | 1.8<br>773<br>270<br>44  | 0.9<br>086<br>8<br>44        | 1.8<br>77<br>32<br>70<br>44 | U<br>p           | 0.0<br>39<br>44<br>87<br>73 | 0.6<br>63<br>32<br>74<br>04 |
| 46<br>48       | MYO<br>7B      | Myosin VIIB                                                                | 8.<br>60<br>75<br>3 | 8.<br>62<br>37<br>8 | 8.<br>22<br>16<br>1 | 7.<br>43<br>76<br>1 | 7.<br>94<br>60<br>7 | 8.<br>24<br>36<br>8 | -1.<br>524<br>694<br>287 | -0.<br>608<br>52<br>42<br>87 | 1.5<br>24<br>69<br>42<br>87 | D<br>o<br>w<br>n | 0.0<br>41<br>96<br>94<br>96 | 0.6<br>63<br>32<br>74<br>04 |
| 11<br>03<br>1  | RAB<br>31      | RAB31, member<br>RAS oncogene<br>family                                    | 5.<br>12<br>63<br>7 | 6.<br>53<br>87<br>2 | 5.<br>11<br>53      | 7.<br>91<br>77<br>7 | 6.<br>75<br>93<br>5 | 6.<br>07<br>77<br>2 | 2.5<br>050<br>105<br>28  | 1.3<br>248<br>166<br>67      | 2.5<br>05<br>01<br>05<br>28 | U<br>p           | 0.0<br>49<br>20<br>26<br>94 | 0.6<br>63<br>32<br>74<br>04 |
| 34<br>29<br>79 | PAL<br>M3      | Paralemmin 3                                                               | 8.<br>43<br>37<br>8 | 8.<br>60<br>50<br>6 | 7.<br>63<br>29      | 6.<br>82<br>57<br>2 | 6.<br>43<br>76<br>7 | 7.<br>97<br>89<br>6 | -2.<br>208<br>596<br>7   | -1.<br>143<br>13<br>7        | 2.2<br>08<br>59<br>67       | D<br>o<br>w<br>n | 0.0<br>35<br>02<br>94<br>12 | 0.6<br>63<br>32<br>74<br>04 |
| 59<br>18       | RAR<br>RES1    | Retinoic acid<br>receptor responder<br>(tazarotene<br>induced) 1           | 4.<br>73<br>39<br>9 | 5.<br>21<br>68<br>9 | 5.<br>81<br>04<br>9 | 7.<br>55<br>22<br>1 | 8.<br>10<br>82<br>2 | 5.<br>70<br>59<br>3 | 3.6<br>510<br>970<br>05  | 1.8<br>683<br>3<br>70        | 3.6<br>51<br>09<br>70       | U<br>p           | 0.0<br>18<br>54<br>00       | 0.6<br>63<br>32<br>74       |

|    |     |                          |    |    |    |    |    |    |     |     |     |   |     |     |
|----|-----|--------------------------|----|----|----|----|----|----|-----|-----|-----|---|-----|-----|
|    |     |                          |    |    |    |    |    |    |     |     | 05  |   | 45  | 04  |
| 70 | KLF | Kruppel-like factor      | 7. | 6. | 6. | 7. | 7. | 6. | 1.6 | 0.6 | 1.6 | U | 0.0 | 0.6 |
| 71 | 10  | 10                       | 09 | 33 | 84 | 51 | 81 | 98 | 018 | 797 | 01  | p | 48  | 63  |
|    |     |                          | 09 | 76 | 36 | 52 | 49 | 13 | 843 | 7   | 88  |   | 34  | 32  |
|    |     |                          | 5  | 7  | 6  | 8  | 9  | 2  | 56  |     | 43  |   | 18  | 74  |
|    |     |                          |    |    |    |    |    |    |     |     | 56  |   | 7   | 04  |
| 19 | EME | Essential meiotic        | 5. | 6. | 5. | 4. | 5. | 4. | -1. | -0. | 1.8 | D | 0.0 | 0.6 |
| 73 | 2   | structure-specific       | 53 | 35 | 52 | 67 | 26 | 82 | 847 | 885 | 47  | o | 16  | 63  |
| 42 |     | endonuclease             | 54 | 63 | 67 | 11 | 54 | 48 | 703 | 733 | 70  | w | 07  | 32  |
|    |     | subunit 2                | 6  | 1  | 5  |    | 2  |    | 585 | 333 | 35  | n | 80  | 74  |
|    |     |                          |    |    |    |    |    |    |     |     | 85  |   | 67  | 04  |
| 51 | PDE | Phosphodiesterase        | 3. | 4. | 3. | 4. | 5. | 4. | 1.5 | 0.6 | 1.5 | U | 0.0 | 0.6 |
| 40 | 3B  | 3B                       | 81 | 15 | 82 | 44 | 06 | 10 | 223 | 063 | 22  | p | 47  | 63  |
|    |     |                          | 86 | 45 | 38 | 33 | 34 | 92 | 956 | 433 | 39  |   | 79  | 32  |
|    |     |                          |    | 1  | 3  |    | 7  |    | 38  | 33  | 56  |   | 26  | 74  |
|    |     |                          |    |    |    |    |    |    |     |     | 38  |   | 47  | 04  |
| 26 | GBP | Guanylate binding        | 5. | 5. | 6. | 6. | 6. | 6. | 1.8 | 0.8 | 1.8 | U | 0.0 | 0.6 |
| 34 | 2   | protein 2,               | 19 | 93 | 42 | 50 | 97 | 75 | 535 | 902 | 53  | p | 27  | 63  |
|    |     | interferon-inducibl      | 77 | 62 | 27 | 16 | 55 | 03 | 229 | 7   | 52  |   | 12  | 32  |
|    |     | e                        | 3  | 9  | 2  | 2  | 8  | 5  | 78  |     | 29  |   | 50  | 74  |
|    |     |                          |    |    |    |    |    |    |     |     | 78  |   | 02  | 04  |
| 29 | SNX | Sorting nexin 10         | 3. | 4. | 4. | 5. | 5. | 4. | 1.7 | 0.7 | 1.7 | U | 0.0 | 0.6 |
| 88 | 10  |                          | 98 | 83 | 83 | 43 | 70 | 87 | 251 | 867 | 25  | p | 38  | 63  |
| 7  |     |                          | 97 | 83 | 32 | 90 | 42 | 82 | 956 | 6   | 19  |   | 11  | 32  |
|    |     |                          | 3  | 4  | 5  | 9  | 7  | 4  | 7   |     | 56  |   | 61  | 74  |
|    |     |                          |    |    |    |    |    |    |     |     | 7   |   | 47  | 04  |
| 97 | PCD | Protocadherin $\alpha$ 9 | 7. | 7. | 6. | 6. | 6. | 6. | -1. | -0. | 1.5 | D | 0.0 | 0.6 |
| 52 | HA9 |                          | 44 | 73 | 91 | 53 | 83 | 80 | 557 | 639 | 57  | o | 31  | 63  |
|    |     |                          | 20 | 45 | 29 | 69 | 18 | 31 | 526 | 256 | 52  | w | 81  | 32  |

|    |      |                     |    |    |    |    |    |    |     |     |     |   |     |     |
|----|------|---------------------|----|----|----|----|----|----|-----|-----|-----|---|-----|-----|
|    |      |                     | 9  | 2  | 9  |    | 2  | 1  | 454 | 667 | 64  | n | 64  | 74  |
|    |      |                     |    |    |    |    |    |    |     |     | 54  |   | 86  | 04  |
| 29 | MDF  | Myod family         | 3. | 3. | 3. | 5. | 4. | 3. | 2.0 | 1.0 | 2.0 | U | 0.0 | 0.6 |
| 96 | IC   | inhibitor domain    | 24 | 28 | 70 | 03 | 67 | 70 | 804 | 568 | 80  | p | 16  | 63  |
| 9  |      | containing          | 56 | 68 | 48 | 16 | 14 | 48 | 034 | 633 | 40  |   | 18  | 32  |
|    |      |                     | 2  | 2  | 1  | 3  |    | 1  | 47  | 33  | 34  |   | 07  | 74  |
|    |      |                     |    |    |    |    |    |    |     |     | 47  |   | 55  | 04  |
| 13 | IL17 | Interleukin 17      | 8. | 8. | 8. | 6. | 7. | 8. | -1. | -0. | 1.8 | D | 0.0 | 0.6 |
| 20 | RE   | receptor E          | 32 | 16 | 13 | 74 | 17 | 03 | 851 | 888 | 51  | o | 27  | 63  |
| 14 |      |                     | 16 | 47 | 55 | 17 | 66 | 75 | 412 | 626 | 41  | w | 93  | 32  |
|    |      |                     |    | 3  | 2  | 4  | 6  | 7  | 884 | 667 | 28  | n | 61  | 74  |
|    |      |                     |    |    |    |    |    |    |     |     | 84  |   | 39  | 04  |
| 84 | SRP  | Sushi-repeat        | 5. | 7. | 6. | 8. | 8. | 7. | 3.1 | 1.6 | 3.1 | U | 0.0 | 0.6 |
| 06 | X    | containing protein, | 58 | 10 | 77 | 16 | 48 | 74 | 173 | 403 | 17  | p | 05  | 63  |
|    |      | X-linked            | 60 | 29 | 70 | 11 | 12 | 46 | 064 |     | 30  |   | 02  | 32  |
|    |      |                     | 5  | 8  | 5  | 6  | 1  | 1  | 77  |     | 64  |   | 32  | 74  |
|    |      |                     |    |    |    |    |    |    |     |     | 77  |   | 48  | 04  |
| 27 | PPA2 | Pyrophosphatase     | 7. | 7. | 7. | 6. | 7. | 7. | -1. | -0. | 1.5 | D | 0.0 | 0.6 |
| 06 |      | (inorganic) 2       | 75 | 27 | 67 | 49 | 08 | 27 | 533 | 617 | 33  | o | 43  | 63  |
| 8  |      |                     | 90 | 20 | 52 | 82 | 02 | 66 | 742 | 056 | 74  | w | 70  | 32  |
|    |      |                     | 1  | 9  | 1  | 3  | 7  | 4  | 901 | 667 | 29  | n | 02  | 74  |
|    |      |                     |    |    |    |    |    |    |     |     | 01  |   | 77  | 04  |
| 58 | KMT  | Lysine (K)-specific | 7. | 7. | 7. | 6. | 6. | 6. | -1. | -0. | 1.5 | D | 0.0 | 0.6 |
| 50 | 2C   | methyltransferase   | 49 | 64 | 07 | 85 | 68 | 88 | 511 | 595 | 11  | o | 18  | 63  |
| 8  |      | 2C                  | 63 | 48 | 38 | 24 | 84 | 76 | 010 | 513 | 01  | w | 43  | 32  |
|    |      |                     | 6  | 5  | 5  | 1  | 4  | 7  | 131 | 333 | 01  | n | 06  | 74  |
|    |      |                     |    |    |    |    |    |    |     |     | 31  |   | 8   | 04  |
| 47 | NED  | Neural precursor    | 4. | 3. | 4. | 4. | 4. | 4. | 1.5 | 0.6 | 1.5 | U | 0.0 | 0.6 |
| 34 | D4   | cell expressed,     | 50 | 68 | 42 | 90 | 80 | 73 | 274 | 111 | 27  | p | 33  | 63  |

|               |           |                                                                        |                     |                     |                     |                      |                      |                     |                          |                             |                             |                  |                             |                             |
|---------------|-----------|------------------------------------------------------------------------|---------------------|---------------------|---------------------|----------------------|----------------------|---------------------|--------------------------|-----------------------------|-----------------------------|------------------|-----------------------------|-----------------------------|
|               |           | developmentally<br>down-regulated 4,<br>E3 ubiquitin<br>protein ligase | 25<br>5<br>46<br>3  | 65<br>2<br>82<br>1  | 71<br>1<br>82<br>3  | 57<br>6<br>09<br>91  | 52<br>9<br>41<br>61  | 85<br>5<br>72<br>3  | 657<br>17<br>878<br>71   | 4<br>17<br>6<br>71          | 46<br>57<br>48<br>78<br>71  |                  | 79<br>97<br>43<br>2         | 32<br>74<br>04<br>04        |
| 81<br>67<br>1 | VMP<br>1  | Vacuole membrane<br>protein 1                                          | 9.<br>81<br>46<br>3 | 8.<br>77<br>82<br>1 | 9.<br>39<br>82<br>3 | 10<br>.2<br>09<br>91 | 10<br>.8<br>41<br>61 | 9.<br>97<br>72<br>3 | 2.0<br>174<br>878<br>71  | 1.0<br>125<br>6<br>78<br>71 | 2.0<br>17<br>48<br>78<br>71 | U<br>p           | 0.0<br>17<br>46<br>53<br>2  | 0.6<br>63<br>32<br>74<br>04 |
| 84<br>91<br>3 | ATO<br>H8 | Atonal bhlh<br>transcription factor<br>8                               | 6.<br>52<br>48<br>6 | 6.<br>82<br>84<br>7 | 6.<br>67<br>23<br>8 | 7.<br>74<br>32<br>1  | 7.<br>50<br>50<br>9  | 6.<br>81<br>03<br>6 | 1.5<br>995<br>321<br>61  | 0.6<br>776<br>5<br>21<br>61 | 1.5<br>99<br>53<br>21<br>61 | U<br>p           | 0.0<br>35<br>70<br>33<br>73 | 0.6<br>63<br>32<br>74<br>04 |
| 20<br>34      | EPAS<br>1 | Endothelial PAS<br>domain protein 1                                    | 8.<br>36<br>18<br>2 | 9.<br>01<br>53<br>8 | 9.<br>00<br>67<br>8 | 10<br>.0<br>62<br>01 | 9.<br>93<br>67<br>8  | 9.<br>49<br>30<br>4 | 2.0<br>504<br>634<br>11  | 1.0<br>359<br>5<br>34<br>11 | 2.0<br>50<br>46<br>34<br>11 | U<br>p           | 0.0<br>04<br>14<br>64<br>35 | 0.6<br>63<br>32<br>74<br>04 |
| 10<br>39<br>5 | DLC<br>1  | DLC1 Rho gtpase<br>activating protein                                  | 6.<br>33<br>17<br>9 | 6.<br>82<br>31<br>2 | 6.<br>66<br>89<br>4 | 7.<br>85<br>59<br>5  | 8.<br>19<br>69<br>2  | 7.<br>49<br>79<br>7 | 2.3<br>658<br>030<br>89  | 1.2<br>423<br>3<br>30<br>89 | 2.3<br>65<br>80<br>30<br>89 | U<br>p           | 0.0<br>01<br>08<br>28<br>64 | 0.6<br>63<br>32<br>74<br>04 |
| 10<br>40      | CDS<br>1  | CDP-diacylglycero<br>l synthase 1                                      | 9.<br>35<br>77<br>6 | 8.<br>67<br>23<br>3 | 8.<br>71<br>00<br>4 | 7.<br>25<br>71<br>1  | 7.<br>80<br>93<br>2  | 8.<br>79<br>47<br>1 | -1.<br>944<br>855<br>991 | -0.<br>959<br>663<br>333    | 1.9<br>44<br>85<br>59<br>91 | D<br>o<br>w<br>n | 0.0<br>48<br>53<br>49<br>87 | 0.6<br>63<br>32<br>74<br>04 |

|    |      |                     |    |    |    |    |    |    |     |     |     |   |     |     |
|----|------|---------------------|----|----|----|----|----|----|-----|-----|-----|---|-----|-----|
| 74 | VAV  | Vav guanine         | 8. | 8. | 8. | 7. | 7. | 7. | -1. | -0. | 1.7 | D | 0.0 | 0.6 |
| 10 | 2    | nucleotide          | 86 | 42 | 35 | 50 | 84 | 95 | 720 | 782 | 20  | o | 07  | 63  |
|    |      | exchange factor 2   | 68 | 61 | 82 | 09 | 77 | 38 | 578 | 893 | 57  | w | 23  | 32  |
|    |      |                     | 6  | 5  |    | 5  | 7  | 1  | 044 | 333 | 80  | n | 20  | 74  |
|    |      |                     |    |    |    |    |    |    |     |     | 44  |   | 44  | 04  |
| 54 | SOX  | SRY-box 18          | 5. | 5. | 5. | 7. | 6. | 5. | 2.2 | 1.2 | 2.2 | U | 0.0 | 0.6 |
| 34 | 18   |                     | 03 | 74 | 86 | 29 | 99 | 96 | 984 | 006 | 98  | p | 17  | 63  |
| 5  |      |                     | 50 | 68 | 95 | 47 | 30 | 55 | 373 | 533 | 43  |   | 31  | 32  |
|    |      |                     | 5  | 2  | 3  | 9  | 1  | 6  | 36  | 33  | 73  |   | 69  | 74  |
|    |      |                     |    |    |    |    |    |    |     |     | 36  |   | 74  | 04  |
| 34 | IGFB | Insulin like growth | 8. | 11 | 9. | 12 | 11 | 10 | 4.1 | 2.0 | 4.1 | U | 0.0 | 0.6 |
| 90 | P7   | factor binding      | 01 | .1 | 88 | .6 | .5 | .9 | 039 | 370 | 03  | p | 36  | 63  |
|    |      | protein 7           | 39 | 17 | 56 | 54 | 53 | 20 | 410 | 1   | 94  |   | 89  | 32  |
|    |      |                     | 2  | 89 | 5  | 96 | 3  | 23 | 28  |     | 10  |   | 58  | 74  |
|    |      |                     |    |    |    |    |    |    |     |     | 28  |   | 11  | 04  |
| 16 | TME  | Transmembrane       | 7. | 7. | 7. | 6. | 7. | 7. | -1. | -0. | 1.5 | D | 0.0 | 0.6 |
| 11 | M22  | protein 229B        | 77 | 65 | 31 | 66 | 02 | 02 | 599 | 677 | 99  | o | 10  | 63  |
| 45 | 9B   |                     | 90 | 19 | 69 | 52 | 39 | 70 | 088 | 25  | 08  | w | 43  | 32  |
|    |      |                     | 7  | 4  | 4  | 1  | 1  | 8  | 738 |     | 87  | n | 39  | 74  |
|    |      |                     |    |    |    |    |    |    |     |     | 38  |   | 93  | 04  |
| 51 | FKB  | FK506 binding       | 4. | 5. | 4. | 6. | 5. | 5. | 1.7 | 0.8 | 1.7 | U | 0.0 | 0.6 |
| 66 | P7   | protein 7           | 39 | 30 | 84 | 17 | 65 | 12 | 473 | 051 | 47  | p | 44  | 63  |
| 1  |      |                     | 67 | 27 | 54 | 91 | 73 | 40 | 839 | 966 | 38  |   | 98  | 32  |
|    |      |                     | 6  | 8  | 6  | 7  | 8  | 4  | 77  | 67  | 39  |   | 48  | 74  |
|    |      |                     |    |    |    |    |    |    |     |     | 77  |   | 82  | 04  |
| 10 | POS  | Periostin,          | 3. | 3. | 4. | 6. | 6. | 4. | 3.7 | 1.9 | 3.7 | U | 0.0 | 0.6 |
| 63 | TN   | osteoblast specific | 86 | 40 | 02 | 59 | 39 | 01 | 339 | 006 | 33  | p | 22  | 63  |
| 1  |      | factor              | 89 | 50 | 95 | 21 | 41 | 94 | 259 | 933 | 92  |   | 40  | 32  |
|    |      |                     | 9  | 6  | 7  | 1  | 3  | 6  | 93  | 33  | 59  |   | 17  | 74  |

|    |      |                           |    |    |    |    |    |    |     |     |     |    |     |     |    |
|----|------|---------------------------|----|----|----|----|----|----|-----|-----|-----|----|-----|-----|----|
|    |      |                           |    |    |    |    |    |    |     |     |     | 93 |     | 24  | 04 |
| 90 | LDB  | LIM domain                | 3. | 3. | 4. | 5. | 6. | 4. | 3.3 | 1.7 | 3.3 | U  | 0.0 | 0.6 |    |
| 79 | 2    | binding 2                 | 72 | 38 | 35 | 71 | 33 | 59 | 104 | 270 | 10  | p  | 06  | 63  |    |
|    |      |                           | 2  | 85 | 45 | 77 | 43 | 41 | 943 | 466 | 49  |    | 85  | 32  |    |
|    |      |                           |    | 7  |    | 8  |    | 3  | 47  | 67  | 43  |    | 86  | 74  |    |
|    |      |                           |    |    |    |    |    |    |     |     | 47  |    | 45  | 04  |    |
| 51 | PDE  | Phosphodiesterase         | 5. | 7. | 6. | 7. | 7. | 7. | 2.2 | 1.1 | 2.2 | U  | 0.0 | 0.6 |    |
| 36 | 1A   | 1A                        | 48 | 49 | 34 | 95 | 61 | 30 | 650 | 795 | 65  | p  | 43  | 63  |    |
|    |      |                           | 93 | 35 | 75 | 15 | 40 | 34 | 192 | 233 | 01  |    | 92  | 32  |    |
|    |      |                           | 8  | 7  | 2  | 2  | 8  | 4  | 84  | 33  | 92  |    | 71  | 74  |    |
|    |      |                           |    |    |    |    |    |    |     |     | 84  |    | 99  | 04  |    |
| 84 | PPFI | PTPRF interacting         | 8. | 8. | 8. | 7. | 7. | 8. | -1. | -0. | 1.5 | D  | 0.0 | 0.6 |    |
| 95 | BP2  | protein, binding          | 54 | 38 | 56 | 37 | 94 | 31 | 535 | 618 | 35  | o  | 43  | 63  |    |
|    |      | protein 2 (liprin $\beta$ | 68 | 00 | 14 | 49 | 13 | 65 | 270 | 493 | 27  | w  | 47  | 32  |    |
|    |      | 2)                        | 5  | 8  | 1  | 6  | 7  | 3  | 996 | 333 | 09  | n  | 49  | 74  |    |
|    |      |                           |    |    |    |    |    |    |     |     | 96  |    | 79  | 04  |    |
| 30 | HIST | Histone cluster 1,        | 6. | 5. | 6. | 5. | 5. | 6. | -1. | -0. | 1.6 | D  | 0.0 | 0.6 |    |
| 12 | 1H2  | h2ae                      | 36 | 95 | 16 | 09 | 08 | 07 | 669 | 739 | 69  | o  | 41  | 63  |    |
|    | AE   |                           | 30 | 35 | 00 | 35 | 66 | 74 | 801 | 676 | 80  | w  | 79  | 32  |    |
|    |      |                           | 5  | 4  | 7  | 5  |    | 8  | 565 | 667 | 15  | n  | 15  | 74  |    |
|    |      |                           |    |    |    |    |    |    |     |     | 65  |    | 43  | 04  |    |
| 67 | ZFP3 | ZFP36 ring finger         | 7. | 6. | 6. | 8. | 8. | 7. | 2.5 | 1.3 | 2.5 | U  | 0.0 | 0.6 |    |
| 8  | 6L2  | protein-like 2            | 23 | 98 | 67 | 53 | 62 | 84 | 882 | 719 | 88  | p  | 01  | 63  |    |
|    |      |                           | 85 | 23 | 39 | 38 | 93 | 76 | 853 | 966 | 28  |    | 19  | 32  |    |
|    |      |                           | 2  | 6  | 6  | 7  | 4  | 2  | 29  | 67  | 53  |    | 92  | 74  |    |
|    |      |                           |    |    |    |    |    |    |     |     | 29  |    | 81  | 04  |    |
| 71 | TPD  | Tumor protein             | 4. | 4. | 4. | 5. | 4. | 4. | 1.5 | 0.5 | 1.5 | U  | 0.0 | 0.6 |    |
| 65 | 52L2 | D52-like 2                | 21 | 14 | 53 | 26 | 58 | 80 | 044 | 892 | 04  | p  | 27  | 63  |    |
|    |      |                           | 64 | 65 | 05 | 57 | 94 | 60 | 644 | 5   | 46  |    | 33  | 32  |    |

|    |      |                     |    |    |    |    |    |    |     |     |     |   |     |     |
|----|------|---------------------|----|----|----|----|----|----|-----|-----|-----|---|-----|-----|
|    |      |                     | 4  | 2  | 7  | 8  | 1  | 9  | 33  |     | 44  |   | 35  | 74  |
|    |      |                     |    |    |    |    |    |    |     |     | 33  |   | 09  | 04  |
| 15 | CTS  | Cathepsin W         | 5. | 6. | 6. | 5. | 5. | 5. | -1. | -0. | 1.6 | D | 0.0 | 0.6 |
| 21 | W    |                     | 22 | 09 | 03 | 06 | 01 | 01 | 684 | 752 | 84  | o | 20  | 63  |
|    |      |                     | 11 | 74 | 34 | 77 | 39 | 39 | 254 | 11  | 25  | w | 28  | 32  |
|    |      |                     | 4  | 3  | 1  | 3  | 6  | 6  | 32  |     | 43  | n | 44  | 74  |
|    |      |                     |    |    |    |    |    |    |     |     | 2   |   |     | 04  |
| 53 | GPR  | G protein-coupled   | 3. | 4. | 4. | 3. | 3. | 3. | -1. | -0. | 1.6 | D | 0.0 | 0.6 |
| 83 | 84   | receptor 84         | 54 | 59 | 13 | 24 | 37 | 61 | 604 | 682 | 04  | o | 35  | 63  |
| 1  |      |                     | 88 | 03 | 82 | 17 | 18 | 75 | 451 | 08  | 45  | w | 41  | 32  |
|    |      |                     | 6  | 8  |    | 8  | 9  | 3  | 3   |     | 13  | n | 63  | 74  |
|    |      |                     |    |    |    |    |    |    |     |     |     |   | 81  | 04  |
| 31 | HLA  | Major               | 4. | 4. | 5. | 5. | 5. | 6. | 2.0 | 1.0 | 2.0 | U | 0.0 | 0.6 |
| 09 | -DM  | histocompatibility  | 00 | 98 | 28 | 99 | 04 | 25 | 085 | 061 | 08  | p | 49  | 63  |
|    | B    | complex, class II,  | 57 | 10 | 5  | 11 | 22 | 68 | 114 | 266 | 51  |   | 35  | 32  |
|    |      | DM $\beta$          | 7  | 4  |    | 1  | 4  | 4  | 23  | 67  | 14  |   | 30  | 74  |
|    |      |                     |    |    |    |    |    |    |     |     | 23  |   | 86  | 04  |
| 17 | DIO2 | Deiodinase,         | 2. | 3. | 3. | 6. | 4. | 3. | 3.2 | 1.6 | 3.2 | U | 0.0 | 0.6 |
| 34 |      | iodothyronine, type | 73 | 72 | 01 | 14 | 57 | 79 | 064 | 809 | 06  | p | 22  | 63  |
|    |      | II                  | 09 | 50 | 13 | 14 | 27 | 61 | 272 | 666 | 42  |   | 46  | 32  |
|    |      |                     | 7  | 8  | 3  | 4  |    | 4  | 33  | 67  | 72  |   | 74  | 74  |
|    |      |                     |    |    |    |    |    |    |     |     | 33  |   | 93  | 04  |
| 25 | AMB  | A-1-microglobulin/  | 5. | 5. | 6. | 4. | 4. | 5. | -2. | -1. | 2.0 | D | 0.0 | 0.6 |
| 9  | P    | bikunin precursor   | 56 | 70 | 15 | 50 | 33 | 43 | 069 | 049 | 69  | o | 13  | 63  |
|    |      |                     | 67 | 01 | 59 | 55 | 57 | 40 | 295 | 14  | 29  | w | 38  | 32  |
|    |      |                     | 6  | 4  | 3  | 4  | 9  | 8  | 959 |     | 59  | n | 06  | 74  |
|    |      |                     |    |    |    |    |    |    |     |     | 59  |   | 75  | 04  |
| 54 | AFT  | Aftiphilin          | 8. | 8. | 8. | 7. | 7. | 7. | -1. | -0. | 1.5 | D | 0.0 | 0.6 |
| 81 | PH   |                     | 55 | 05 | 25 | 52 | 63 | 81 | 547 | 629 | 47  | o | 12  | 63  |



|    |     |                             |    |    |    |    |    |    |     |     |     |   |     |     |
|----|-----|-----------------------------|----|----|----|----|----|----|-----|-----|-----|---|-----|-----|
| 2  |     |                             | 88 | 29 | 13 | 28 | 50 | 57 | 379 | 826 | 37  | w | 14  | 32  |
|    |     |                             | 8  |    | 4  | 4  | 7  | 3  | 072 | 667 | 90  | n | 44  | 74  |
|    |     |                             |    |    |    |    |    |    |     |     | 72  |   | 59  | 04  |
| 78 | CXC | Chemokine                   | 5. | 5. | 5. | 7. | 7. | 6. | 3.6 | 1.8 | 3.6 | U | 0.0 | 0.6 |
| 52 | R4  | (C-X-C motif)<br>receptor 4 | 39 | 12 | 79 | 65 | 72 | 57 | 731 | 770 | 73  | p | 00  | 63  |
|    |     |                             | 63 | 83 | 26 | 01 | 01 | 81 | 810 | 3   | 18  |   | 94  | 32  |
|    |     |                             | 1  | 2  | 8  |    | 6  | 4  | 3   |     | 10  |   | 67  | 74  |
|    |     |                             |    |    |    |    |    |    |     |     | 3   |   | 28  | 04  |
| 38 | KLC | Kinesin light chain         | 5. | 6. | 5. | 8. | 6. | 6. | 2.1 | 1.1 | 2.1 | U | 0.0 | 0.6 |
| 31 | 1   | 1                           | 59 | 47 | 83 | 03 | 95 | 25 | 623 | 126 | 62  | p | 45  | 63  |
|    |     |                             | 01 | 14 | 68 | 06 | 23 | 33 | 798 | 2   | 37  |   | 91  | 32  |
|    |     |                             | 6  | 3  | 4  | 2  | 5  | 2  | 9   |     | 98  |   | 15  | 74  |
|    |     |                             |    |    |    |    |    |    |     |     | 9   |   | 76  | 04  |
| 32 | HOX | Homeobox D8                 | 3. | 3. | 3. | 5. | 5. | 4. | 2.0 | 1.0 | 2.0 | U | 0.0 | 0.6 |
| 34 | D8  |                             | 83 | 66 | 95 | 03 | 49 | 02 | 499 | 355 | 49  | p | 21  | 63  |
|    |     |                             | 12 | 96 | 94 | 91 | 94 | 85 | 423 | 833 | 94  |   | 89  | 32  |
|    |     |                             | 9  |    | 3  |    | 2  | 5  | 44  | 33  | 23  |   | 14  | 74  |
|    |     |                             |    |    |    |    |    |    |     |     | 44  |   | 78  | 04  |
| 39 | STM | Stathmin 1                  | 4. | 5. | 5. | 6. | 5. | 5. | 1.7 | 0.8 | 1.7 | U | 0.0 | 0.6 |
| 25 | N1  |                             | 95 | 54 | 52 | 79 | 96 | 69 | 482 | 059 | 48  | p | 40  | 63  |
|    |     |                             | 29 | 77 | 86 | 18 | 51 | 00 | 400 | 033 | 24  |   | 24  | 32  |
|    |     |                             |    | 8  | 9  | 8  | 8  | 2  | 97  | 33  | 00  |   | 34  | 74  |
|    |     |                             |    |    |    |    |    |    |     |     | 97  |   | 72  | 04  |
| 10 | BAI | BAI1-associated             | 8. | 7. | 7. | 7. | 7. | 7. | -1. | -0. | 1.5 | D | 0.0 | 0.6 |
| 45 | AP2 | protein 2                   | 23 | 85 | 43 | 18 | 17 | 16 | 584 | 663 | 84  | o | 20  | 63  |
| 8  |     |                             | 33 | 26 | 16 | 35 | 64 | 56 | 411 | 946 | 41  | w | 42  | 32  |
|    |     |                             | 4  |    |    | 8  | 9  | 3  | 048 | 667 | 10  | n | 75  | 74  |
|    |     |                             |    |    |    |    |    |    |     |     | 48  |   | 86  | 04  |
| 56 | EMS | EMSY,                       | 6. | 5. | 5. | 5. | 5. | 5. | -1. | -0. | 1.5 | D | 0.0 | 0.6 |

|    |      |                   |    |    |    |    |    |    |     |     |     |   |     |     |
|----|------|-------------------|----|----|----|----|----|----|-----|-----|-----|---|-----|-----|
| 94 | Y    | BRCA2-interacting | 12 | 98 | 84 | 04 | 03 | 89 | 580 | 659 | 80  | o | 39  | 63  |
| 6  |      | transcriptional   | 18 | 54 | 51 | 35 | 74 | 17 | 005 | 93  | 00  | w | 21  | 32  |
|    |      | repressor         | 1  | 5  | 9  |    | 3  | 3  | 959 |     | 59  | n | 46  | 74  |
|    |      |                   |    |    |    |    |    |    |     |     | 59  |   | 3   | 04  |
| 71 | TSPA | Tetraspanin 7     | 6. | 7. | 6. | 7. | 7. | 6. | 1.8 | 0.9 | 1.8 | U | 0.0 | 0.6 |
| 02 | N7   |                   | 34 | 01 | 58 | 85 | 95 | 88 | 843 | 140 | 84  | p | 26  | 63  |
|    |      |                   | 34 | 45 | 68 | 09 | 05 | 55 | 800 | 9   | 38  |   | 64  | 32  |
|    |      |                   | 6  | 3  | 3  | 8  | 7  | 4  | 98  |     | 00  |   | 75  | 74  |
|    |      |                   |    |    |    |    |    |    |     |     | 98  |   | 51  | 04  |
| 36 | ISG2 | Interferon        | 11 | 10 | 11 | 8. | 10 | 10 | -2. | -1. | 2.6 | D | 0.0 | 0.6 |
| 69 | 0    | stimulated        | .2 | .9 | .1 | 34 | .0 | .7 | 697 | 431 | 97  | o | 34  | 63  |
|    |      | exonuclease gene  | 42 | 75 | 36 | 84 | 05 | 05 | 238 | 483 | 23  | w | 48  | 32  |
|    |      | 20kda             | 32 | 51 | 12 | 3  | 12 | 95 | 944 | 333 | 89  | n | 01  | 74  |
|    |      |                   |    |    |    |    |    |    |     |     | 44  |   | 44  | 04  |
| 57 | PLX  | Plexin domain     | 3. | 4. | 4. | 5. | 4. | 5. | 1.6 | 0.7 | 1.6 | U | 0.0 | 0.6 |
| 12 | DC1  | containing 1      | 96 | 85 | 28 | 36 | 87 | 14 | 996 | 652 | 99  | p | 19  | 63  |
| 5  |      |                   | 04 | 00 | 45 | 47 | 68 | 92 | 762 | 6   | 67  |   | 88  | 32  |
|    |      |                   | 9  | 2  | 2  | 4  | 2  | 5  | 83  |     | 62  |   | 61  | 74  |
|    |      |                   |    |    |    |    |    |    |     |     | 83  |   | 76  | 04  |
| 11 | EFH  | EF-hand domain    | 5. | 5. | 5. | 4. | 4. | 5. | -1. | -0. | 1.5 | D | 0.0 | 0.6 |
| 43 | C1   | (C-terminal)      | 39 | 51 | 61 | 53 | 99 | 11 | 549 | 632 | 49  | o | 13  | 63  |
| 27 |      | containing 1      | 86 | 29 | 87 | 05 | 17 | 15 | 876 | 153 | 87  | w | 60  | 32  |
|    |      |                   | 7  | 1  | 8  | 7  | 9  | 4  | 578 | 333 | 65  | n | 65  | 74  |
|    |      |                   |    |    |    |    |    |    |     |     | 78  |   | 75  | 04  |
| 50 | COP  | COP9 signalosome  | 5. | 5. | 5. | 6. | 5. | 6. | 1.7 | 0.8 | 1.7 | U | 0.0 | 0.6 |
| 81 | S7A  | subunit 7A        | 58 | 01 | 56 | 65 | 65 | 30 | 592 | 149 | 59  | p | 28  | 63  |
| 3  |      |                   | 43 | 22 | 9  | 06 | 43 | 54 | 493 | 6   | 24  |   | 34  | 32  |
|    |      |                   | 4  | 1  |    | 4  | 9  |    | 74  |     | 93  |   | 24  | 74  |
|    |      |                   |    |    |    |    |    |    |     |     | 74  |   | 75  | 04  |

|    |      |                                                |         |         |         |        |        |        |        |        |        |   |          |        |
|----|------|------------------------------------------------|---------|---------|---------|--------|--------|--------|--------|--------|--------|---|----------|--------|
| 85 | TSLP | Thymic stromal lymphopoietin                   | 2.45716 | 3.6942  | 2.8897  | 5.9095 | 4.1664 | 5.3027 | 4.3248 | 2.1125 | 4.3248 | U | 0.0032   | 0.6632 |
| 33 | TME  | Transmembrane protein 119                      | 6.06708 | 6.66256 | 6.62751 | 7.7374 | 6.8519 | 6.6964 | 1.6938 | 0.7603 | 1.693  | U | 0.04432  | 0.6632 |
| 57 | PLE  | Pleckstrin                                     | 7.30656 | 7.2662  | 6.9391  | 5.9862 | 6.6515 | 6.658  | -1.631 | -0.706 | 1.638  | D | 0.02363  | 0.632  |
| 47 | KHH  | homology, myth4 and FERM domain containing H1  | 30656   | 2662    | 9391    | 9862   | 6515   | 7558   | 631384 | 706096 | 3138   | o | 2363     | 32     |
| 80 | BHL  | Basic                                          | 4.26271 | 4.5424  | 4.6597  | 4.0179 | 3.7156 | 3.9734 | -1.501 | -0.585 | 1.501  | D | 0.007737 | 0.6632 |
| 82 | HB9  | helix-loop-helix domain containing, class B, 9 | 271     | 249     | 974     | 799    | 569    | 349    | 030543 | 953333 | 0305   | w | 7737     | 32     |
| 84 | FAM  | Family with                                    | 9.58046 | 9.31676 | 8.65104 | 8.8055 | 8.8054 | 8.801  | -1.753 | -0.810 | 1.753  | D | 0.047800 | 0.6632 |
| 33 | 195A | sequence similarity 195 member A               | 58046   | 31676   | 65104   | 14055  | 00284  | 97481  | 753235 | 81002  | 5323   | o | 478000   | 63     |
| 44 | FAM  | Family with                                    | 5.02322 | 5.88928 | 5.5375  | 6.8610 | 6.649  | 5.8418 | 1.7933 | 0.8426 | 1.793  | U | 0.03520  | 0.6632 |
| 11 | 26F  | sequence similarity 26 member F                | 02322   | 88928   | 5375    | 8610   | 2749   | 8418   | 933163 | 4263   | 9331   | p | 352047   | 63     |



|    |      |                          |    |    |    |    |    |    |     |     |     |   |     |     |
|----|------|--------------------------|----|----|----|----|----|----|-----|-----|-----|---|-----|-----|
| 19 | RILP | Rab interacting          | 4. | 4. | 4. | 5. | 5. | 4. | 1.5 | 0.6 | 1.5 | U | 0.0 | 0.6 |
| 63 | L2   | lysosomal                | 18 | 29 | 49 | 20 | 05 | 65 | 700 | 507 | 70  | p | 10  | 63  |
| 83 |      | protein-like 2           | 05 | 31 | 26 | 88 | 91 | 07 | 313 | 933 | 03  |   | 43  | 32  |
|    |      |                          | 2  |    | 9  | 4  | 5  |    | 14  | 33  | 13  |   | 71  | 74  |
|    |      |                          |    |    |    |    |    |    |     |     | 14  |   | 64  | 04  |
| 69 | TBX  | T-box 3                  | 3. | 4. | 4. | 5. | 5. | 4. | 2.6 | 1.3 | 2.6 | U | 0.0 | 0.6 |
| 26 | 3    |                          | 51 | 20 | 09 | 74 | 48 | 76 | 341 | 973 | 34  | p | 02  | 63  |
|    |      |                          | 76 | 11 | 16 | 9  | 79 | 56 | 667 | 466 | 16  |   | 27  | 32  |
|    |      |                          | 8  | 8  | 8  |    | 3  | 5  | 35  | 67  | 67  |   | 72  | 74  |
|    |      |                          |    |    |    |    |    |    |     |     | 35  |   | 54  | 04  |
| 25 | ZNF  | Zinc finger protein      | 6. | 6. | 6. | 5. | 5. | 5. | -1. | -0. | 1.5 | D | 0.0 | 0.6 |
| 60 | 549  | 549                      | 32 | 07 | 18 | 59 | 48 | 72 | 510 | 594 | 10  | o | 06  | 63  |
| 51 |      |                          | 53 | 44 | 92 | 46 | 16 | 89 | 036 | 583 | 03  | w | 95  | 32  |
|    |      |                          | 6  | 1  | 6  | 9  | 7  | 2  | 407 | 333 | 64  | n | 09  | 74  |
|    |      |                          |    |    |    |    |    |    |     |     | 07  |   | 51  | 04  |
| 55 | PLC  | Phosphatidylinosit       | 8. | 8. | 7. | 6. | 6. | 7. | -2. | -1. | 2.2 | D | 0.0 | 0.6 |
| 34 | XD1  | ol-specific              | 52 | 15 | 37 | 52 | 59 | 45 | 235 | 160 | 35  | o | 15  | 63  |
| 4  |      | phospholipase C, X       | 23 | 80 | 95 | 11 | 91 | 69 | 979 | 906 | 97  | w | 92  | 32  |
|    |      | domain containing        | 6  | 5  | 4  | 1  | 3  | 9  | 043 | 667 | 90  | n | 49  | 74  |
|    |      | 1                        |    |    |    |    |    |    |     |     | 43  |   | 14  | 04  |
| 22 | FAM  | Family with              | 3. | 3. | 4. | 6. | 6. | 4. | 4.1 | 2.0 | 4.1 | U | 0.0 | 0.6 |
| 09 | 13C  | sequence similarity      | 51 | 99 | 74 | 64 | 94 | 77 | 143 | 406 | 14  | p | 10  | 63  |
| 65 |      | 13 member C              | 15 | 35 | 19 | 73 | 17 | 99 | 656 | 7   | 36  |   | 75  | 32  |
|    |      |                          | 9  |    |    | 2  | 1  | 7  | 1   |     | 56  |   | 52  | 74  |
|    |      |                          |    |    |    |    |    |    |     |     | 1   |   | 75  | 04  |
| 56 | PCD  | Protocadherin $\alpha$ 6 | 7. | 7. | 6. | 6. | 6. | 6. | -1. | -0. | 1.5 | D | 0.0 | 0.6 |
| 14 | HA6  |                          | 44 | 73 | 91 | 53 | 83 | 80 | 557 | 639 | 57  | o | 31  | 63  |
| 2  |      |                          | 20 | 45 | 29 | 69 | 18 | 31 | 526 | 256 | 52  | w | 81  | 32  |
|    |      |                          | 9  | 2  | 9  |    | 2  | 1  | 454 | 667 | 64  | n | 64  | 74  |

|               |             |                                                 |                     |                     |                     |                      |                     |                     |                         |                                   |                             |        |                             |                             |    |
|---------------|-------------|-------------------------------------------------|---------------------|---------------------|---------------------|----------------------|---------------------|---------------------|-------------------------|-----------------------------------|-----------------------------|--------|-----------------------------|-----------------------------|----|
|               |             |                                                 |                     |                     |                     |                      |                     |                     |                         |                                   |                             | 54     |                             | 86                          | 04 |
| 12<br>90      | COL<br>5A2  | Collagen, type V, $\alpha$<br>2                 | 3.<br>57<br>45<br>4 | 4.<br>48<br>23<br>2 | 4.<br>41<br>90<br>2 | 7.<br>71<br>59<br>5  | 5.<br>53<br>73<br>4 | 5.<br>13<br>95<br>2 | 3.9<br>239<br>590<br>89 | 1.9<br>723<br>1<br>90             | 3.9<br>23<br>95<br>90<br>89 | U<br>p | 0.0<br>19<br>83<br>52<br>31 | 0.6<br>63<br>32<br>74<br>04 |    |
| 74<br>32      | VIP         | Vasoactive<br>intestinal peptide                | 3.<br>35<br>04<br>4 | 3.<br>88<br>80<br>2 | 3.<br>52<br>23<br>6 | 4.<br>33<br>64<br>2  | 5.<br>95<br>54<br>3 | 5.<br>47<br>83<br>1 | 3.1<br>816<br>607<br>19 | 1.6<br>697<br>8<br>66<br>07<br>19 | 3.1<br>81<br>66<br>07<br>19 | U<br>p | 0.0<br>04<br>10<br>92<br>7  | 0.6<br>63<br>32<br>74<br>04 |    |
| 64<br>77<br>8 | FND<br>C3B  | Fibronectin type III<br>domain containing<br>3B | 4.<br>58<br>36<br>1 | 4.<br>24<br>92<br>4 | 4.<br>51<br>22<br>9 | 5.<br>78<br>39<br>2  | 4.<br>74<br>55<br>1 | 4.<br>92<br>08<br>5 | 1.6<br>264<br>351<br>88 | 0.7<br>017<br>133<br>33           | 1.6<br>26<br>43<br>51<br>88 | U<br>p | 0.0<br>42<br>13<br>65<br>61 | 0.6<br>63<br>32<br>74<br>04 |    |
| 20<br>06      | ELN         | Elastin                                         | 6.<br>60<br>12<br>1 | 8.<br>50<br>17<br>3 | 7.<br>42<br>38<br>4 | 11<br>.4<br>27<br>04 | 9.<br>05<br>82<br>3 | 8.<br>16<br>15<br>8 | 4.1<br>125<br>218<br>2  | 2.0<br>400<br>233<br>33           | 4.1<br>12<br>52<br>18<br>2  | U<br>p | 0.0<br>48<br>54<br>25<br>76 | 0.6<br>63<br>32<br>74<br>04 |    |
| 69<br>09      | TBX<br>2    | T-box 2                                         | 5.<br>20<br>30<br>2 | 5.<br>76<br>45<br>4 | 4.<br>68<br>12<br>7 | 7.<br>31<br>22<br>1  | 6.<br>65<br>71<br>4 | 5.<br>96<br>31<br>2 | 2.6<br>905<br>106<br>17 | 1.4<br>278<br>8<br>06<br>17       | 2.6<br>90<br>51<br>06<br>17 | U<br>p | 0.0<br>09<br>25<br>47<br>95 | 0.6<br>63<br>32<br>74<br>04 |    |
| 84<br>28<br>1 | C2orf<br>88 | Chromosome 2<br>open reading frame<br>88        | 5.<br>19<br>06      | 3.<br>92<br>98      | 3.<br>62<br>93      | 5.<br>93<br>70       | 6.<br>34<br>49      | 5.<br>33<br>31      | 3.0<br>776<br>233       | 1.6<br>218<br>166                 | 3.0<br>77<br>62             | U<br>p | 0.0<br>08<br>04             | 0.6<br>63<br>32             |    |

|    |      |                           |    |    |    |    |    |    |     |     |     |   |     |     |
|----|------|---------------------------|----|----|----|----|----|----|-----|-----|-----|---|-----|-----|
|    |      |                           |    | 4  | 5  | 9  | 8  | 7  | 2   | 67  | 33  |   | 42  | 74  |
|    |      |                           |    |    |    |    |    |    |     |     | 2   |   | 84  | 04  |
| 51 | EGF  | EGF-like-domain,          | 5. | 5. | 5. | 6. | 6. | 5. | 2.0 | 1.0 | 2.0 | U | 0.0 | 0.6 |
| 16 | L7   | multiple 7                | 55 | 31 | 60 | 88 | 80 | 89 | 496 | 353 | 49  | p | 08  | 63  |
| 2  |      |                           | 89 | 45 | 70 | 13 | 84 | 69 | 629 | 866 | 66  |   | 27  | 32  |
|    |      |                           | 8  | 9  | 1  | 2  | 6  | 6  | 17  | 67  | 29  |   | 51  | 74  |
|    |      |                           |    |    |    |    |    |    |     |     | 17  |   | 77  | 04  |
| 38 | C11o | Chromosome 11             | 7. | 9. | 7. | 10 | 10 | 9. | 4.7 | 2.2 | 4.7 | U | 0.0 | 0.6 |
| 77 | r96  | open reading frame        | 20 | 33 | 01 | .4 | .3 | 48 | 505 | 480 | 50  | p | 08  | 63  |
| 63 |      | 96                        | 78 | 28 | 23 | 42 | 71 | 37 | 569 | 966 | 55  |   | 57  | 32  |
|    |      |                           | 5  | 7  | 5  | 24 | 41 | 1  | 61  | 67  | 69  |   | 06  | 74  |
|    |      |                           |    |    |    |    |    |    |     |     | 61  |   | 29  | 04  |
| 40 | MIR  | Microrna 21               | 9. | 8. | 9. | 10 | 10 | 9. | 2.0 | 1.0 | 2.0 | U | 0.0 | 0.6 |
| 69 | 21   |                           | 81 | 77 | 39 | .2 | .8 | 97 | 174 | 125 | 17  | p | 17  | 63  |
| 91 |      |                           | 46 | 82 | 82 | 09 | 41 | 72 | 878 | 6   | 48  |   | 46  | 32  |
|    |      |                           | 3  | 1  | 3  | 91 | 61 | 3  | 71  |     | 78  |   | 53  | 74  |
|    |      |                           |    |    |    |    |    |    |     |     | 71  |   | 2   | 04  |
| 19 | EGR  | Early growth              | 8. | 6. | 7. | 9. | 10 | 10 | 6.3 | 2.6 | 6.3 | U | 0.0 | 0.6 |
| 58 | 1    | response 1                | 31 | 26 | 86 | 50 | .8 | .0 | 213 | 602 | 21  | p | 02  | 63  |
|    |      |                           | 38 | 16 | 60 | 84 | 46 | 67 | 089 | 233 | 30  |   | 29  | 32  |
|    |      |                           | 7  | 2  | 7  | 1  | 37 | 45 | 76  | 33  | 89  |   | 55  | 74  |
|    |      |                           |    |    |    |    |    |    |     |     | 76  |   | 08  | 04  |
| 20 | TME  | TMEM51                    | 7. | 6. | 5. | 5. | 5. | 6. | -1. | -0. | 1.8 | D | 0.0 | 0.6 |
| 01 | M51- | antisense RNA 1           | 11 | 31 | 98 | 12 | 69 | 03 | 806 | 853 | 06  | o | 45  | 63  |
| 97 | AS1  |                           | 57 | 62 | 90 | 78 | 59 | 75 | 545 | 233 | 54  | w | 26  | 32  |
|    |      |                           | 1  | 4  | 5  | 1  | 4  | 5  | 177 | 333 | 51  | n | 87  | 74  |
|    |      |                           |    |    |    |    |    |    |     |     | 77  |   | 12  | 04  |
| 34 | IGH  | Immunoglobulin            | 8. | 9. | 8. | 9. | 11 | 11 | 5.1 | 2.3 | 5.1 | U | 0.0 | 0.6 |
| 94 | A2   | heavy constant $\alpha$ 2 | 49 | 04 | 21 | 41 | .8 | .5 | 298 | 589 | 29  | p | 06  | 63  |

|                |                 |                                                             |                     |                     |                     |                     |                     |                     |                          |                          |                             |                  |                             |                             |
|----------------|-----------------|-------------------------------------------------------------|---------------------|---------------------|---------------------|---------------------|---------------------|---------------------|--------------------------|--------------------------|-----------------------------|------------------|-----------------------------|-----------------------------|
|                |                 | (A2m marker)                                                | 73<br>6             | 95<br>4             | 78<br>7             | 80<br>9             | 59<br>83            | 63<br>57            | 145<br>33                | 066<br>67                | 81<br>45<br>33              |                  | 85<br>66<br>94              | 32<br>74<br>04              |
| 55<br>31<br>4  | TME<br>M14<br>4 | Transmembrane<br>protein 144                                | 7.<br>96<br>17<br>8 | 7.<br>65<br>44<br>1 | 7.<br>56<br>00<br>5 | 6.<br>70<br>88<br>1 | 7.<br>05<br>13<br>5 | 7.<br>56<br>89<br>6 | -1.<br>532<br>308<br>375 | -0.<br>615<br>706<br>667 | 1.5<br>32<br>30<br>83<br>75 | D<br>o<br>w<br>n | 0.0<br>43<br>95<br>40<br>49 | 0.6<br>63<br>32<br>74<br>04 |
| 43<br>27       | MMP<br>19       | Matrix<br>metallopeptidase<br>19                            | 3.<br>04<br>94<br>2 | 3.<br>45<br>92<br>1 | 3.<br>29<br>34<br>3 | 4.<br>57<br>05<br>6 | 4.<br>05<br>60<br>3 | 3.<br>43<br>55<br>2 | 1.6<br>857<br>025<br>63  | 0.7<br>533<br>5<br>63    | 1.6<br>85<br>70<br>25<br>63 | U<br>p           | 0.0<br>31<br>53<br>91<br>23 | 0.6<br>63<br>32<br>74<br>04 |
| 28<br>40<br>76 | TTL<br>L6       | Tubulin tyrosine<br>ligase like 6                           | 6.<br>34<br>33<br>5 | 6.<br>39<br>33<br>9 | 6.<br>76<br>38<br>7 | 5.<br>25<br>62<br>5 | 5.<br>41<br>99<br>6 | 5.<br>99<br>71<br>1 | -1.<br>921<br>762<br>43  | -0.<br>942<br>43<br>43   | 1.9<br>21<br>76<br>24<br>3  | D<br>o<br>w<br>n | 0.0<br>05<br>76<br>32<br>45 | 0.6<br>63<br>32<br>74<br>04 |
| 15<br>45       | CYP<br>1B1      | Cytochrome P450,<br>family 1, subfamily<br>B, polypeptide 1 | 11<br>.2<br>25<br>1 | 9.<br>28<br>62<br>2 | 9.<br>76<br>76<br>5 | 7.<br>38<br>69<br>5 | 7.<br>87<br>65<br>4 | 9.<br>36<br>03<br>2 | -3.<br>693<br>623<br>117 | -1.<br>885<br>036<br>667 | 3.6<br>93<br>62<br>31<br>17 | D<br>o<br>w<br>n | 0.0<br>21<br>82<br>70<br>58 | 0.6<br>63<br>32<br>74<br>04 |
| 96<br>49       | RAL<br>GPS1     | Ral GEF with PH<br>domain and SH3<br>binding motif 1        | 8.<br>24<br>49<br>6 | 7.<br>69<br>04<br>5 | 8.<br>09<br>08<br>9 | 7.<br>21<br>72<br>8 | 7.<br>19<br>05<br>7 | 7.<br>84<br>21<br>7 | -1.<br>507<br>432<br>428 | -0.<br>592<br>093<br>333 | 1.5<br>07<br>43<br>24<br>28 | D<br>o<br>w<br>n | 0.0<br>46<br>65<br>39<br>49 | 0.6<br>63<br>32<br>74<br>04 |
| 53             | PLC             | Phospholipase C, $\gamma$                                   | 9.                  | 9.                  | 8.                  | 7.                  | 7.                  | 8.                  | -2.                      | -1.                      | 2.1                         | D                | 0.0                         | 0.6                         |



|                |              |                                           |                     |                     |                     |                     |                     |                      |                          |                          |                             |                  |                             |                             |
|----------------|--------------|-------------------------------------------|---------------------|---------------------|---------------------|---------------------|---------------------|----------------------|--------------------------|--------------------------|-----------------------------|------------------|-----------------------------|-----------------------------|
| 36             | G2           | 2<br>(phosphatidylinosit<br>ol-specific)  | 21<br>99<br>2       | 03<br>10<br>2       | 90<br>06<br>6       | 33<br>67<br>6       | 51<br>48<br>4       | 96<br>68<br>933      | 160<br>052<br>667        | 111<br>066<br>667        | 60<br>05<br>29<br>33        | o<br>w<br>n      | 32<br>72<br>48<br>53        | 63<br>32<br>74<br>04        |
| 23<br>55       | FOS<br>L2    | FOS-like antigen 2                        | 6.<br>92<br>65      | 6.<br>44<br>52<br>3 | 6.<br>97<br>75<br>9 | 7.<br>56<br>70<br>1 | 8.<br>20<br>48<br>8 | 7.<br>32<br>24<br>5  | 1.8<br>855<br>777<br>85  | 0.9<br>150<br>066<br>67  | 1.8<br>85<br>57<br>77<br>85 | U<br>p           | 0.0<br>12<br>36<br>35<br>86 | 0.6<br>63<br>32<br>74<br>04 |
| 28<br>65<br>27 | TMS<br>B15B  | Thymosin $\beta$ 15B                      | 3.<br>39<br>12<br>2 | 4.<br>44<br>22<br>7 | 3.<br>88<br>27      | 5.<br>83<br>00<br>5 | 4.<br>77<br>53<br>4 | 4.<br>26<br>12<br>6  | 2.0<br>707<br>499<br>21  | 1.0<br>501<br>533<br>33  | 2.0<br>70<br>74<br>99<br>21 | U<br>p           | 0.0<br>45<br>77<br>42<br>45 | 0.6<br>63<br>32<br>74<br>04 |
| 14<br>76<br>85 | C19o<br>rf18 | Chromosome 19<br>open reading frame<br>18 | 4.<br>75<br>41<br>2 | 5.<br>57<br>31<br>2 | 4.<br>57<br>31<br>9 | 3.<br>84<br>75<br>6 | 4.<br>07<br>24<br>6 | 4.<br>58<br>99<br>1  | -1.<br>737<br>307<br>744 | -0.<br>796<br>853<br>333 | 1.7<br>37<br>30<br>77<br>44 | D<br>o<br>w<br>n | 0.0<br>36<br>68<br>61<br>63 | 0.6<br>63<br>32<br>74<br>04 |
| 25<br>96       | GAP<br>43    | Growth associated<br>protein 43           | 4.<br>10<br>62<br>1 | 4.<br>69<br>17<br>6 | 4.<br>57<br>84      | 8.<br>57<br>73<br>2 | 7.<br>55<br>33<br>2 | 4.<br>58<br>69<br>3  | 5.4<br>530<br>624<br>08  | 2.4<br>470<br>666<br>67  | 5.4<br>53<br>06<br>24<br>08 | U<br>p           | 0.0<br>32<br>95<br>28<br>59 | 0.6<br>63<br>32<br>74<br>04 |
| 51<br>47<br>7  | ISYN<br>A1   | Inositol-3-phosphat<br>e synthase 1       | 5.<br>74<br>15<br>3 | 5.<br>99<br>80<br>7 | 6.<br>04<br>12<br>8 | 6.<br>84<br>35<br>6 | 6.<br>95<br>17<br>6 | 6.<br>21<br>89<br>62 | 1.6<br>753<br>083<br>62  | 0.7<br>444<br>266<br>67  | 1.6<br>75<br>30<br>83<br>62 | U<br>p           | 0.0<br>14<br>98<br>39<br>03 | 0.6<br>63<br>32<br>74<br>04 |

|    |       |                     |    |    |    |    |    |    |     |     |     |   |     |     |
|----|-------|---------------------|----|----|----|----|----|----|-----|-----|-----|---|-----|-----|
| 28 | C3orf | Chromosome 3        | 4. | 6. | 4. | 8. | 6. | 6. | 3.3 | 1.7 | 3.3 | U | 0.0 | 0.6 |
| 53 | 70    | open reading frame  | 07 | 16 | 92 | 08 | 21 | 08 | 380 | 390 | 38  | p | 38  | 63  |
| 82 |       | 70                  | 47 | 31 | 43 | 69 | 02 | 20 | 679 | 133 | 06  |   | 52  | 32  |
|    |       |                     |    | 6  | 9  | 9  | 9  | 1  | 75  | 33  | 79  |   | 72  | 74  |
|    |       |                     |    |    |    |    |    |    |     |     | 75  |   | 04  | 04  |
| 19 | MYR   | Myelin regulatory   | 6. | 6. | 6. | 4. | 4. | 4. | -3. | -1. | 3.5 | D | 5.2 | 0.2 |
| 64 | FL    | factor-like         | 20 | 43 | 44 | 13 | 76 | 69 | 556 | 830 | 56  | o | 66  | 28  |
| 46 |       |                     | 02 | 94 | 49 | 51 | 35 | 48 | 323 | 386 | 32  | w | 86  | 66  |
|    |       |                     | 7  | 5  | 4  | 3  |    | 7  | 752 | 667 | 37  | n | E-0 | 37  |
|    |       |                     |    |    |    |    |    |    |     |     | 52  |   | 5   | 82  |
| 42 | MEO   | Mesenchyme          | 2. | 3. | 3. | 5. | 5. | 3. | 2.9 | 1.5 | 2.9 | U | 0.0 | 0.6 |
| 22 | X1    | homeobox 1          | 84 | 10 | 99 | 47 | 64 | 47 | 167 | 443 | 16  | p | 36  | 63  |
|    |       |                     | 77 | 93 | 94 | 41 | 38 | 17 | 936 | 833 | 79  |   | 46  | 32  |
|    |       |                     | 6  | 8  | 5  | 5  | 7  | 2  | 65  | 33  | 36  |   | 18  | 74  |
|    |       |                     |    |    |    |    |    |    |     |     | 65  |   | 69  | 04  |
| 57 | EPB4  | Erythrocyte         | 7. | 6. | 6. | 4. | 5. | 6. | -2. | -1. | 2.7 | D | 0.0 | 0.6 |
| 66 | 1L5   | membrane protein    | 38 | 68 | 73 | 55 | 49 | 36 | 763 | 466 | 63  | o | 14  | 63  |
| 9  |       | band 4.1 like 5     | 40 | 97 | 17 | 14 | 05 | 41 | 449 | 47  | 44  | w | 13  | 32  |
|    |       |                     | 7  |    | 5  | 5  |    | 6  | 024 |     | 90  | n | 52  | 74  |
|    |       |                     |    |    |    |    |    |    |     |     | 24  |   | 34  | 04  |
| 76 | ZNF   | Zinc finger protein | 6. | 6. | 6. | 5. | 5. | 6. | -1. | -0. | 1.6 | D | 0.0 | 0.6 |
| 96 | 137P  | 137, pseudogene     | 90 | 55 | 23 | 58 | 69 | 25 | 642 | 716 | 42  | o | 26  | 63  |
|    |       |                     | 51 | 56 | 01 | 50 | 80 | 98 | 659 | 033 | 65  | w | 76  | 32  |
|    |       |                     | 9  | 9  | 3  | 2  | 8  | 1  | 355 | 333 | 93  | n | 96  | 74  |
|    |       |                     |    |    |    |    |    |    |     |     | 55  |   | 07  | 04  |
| 70 | TIE1  | Tyrosine kinase     | 4. | 4. | 4. | 6. | 7. | 4. | 3.1 | 1.6 | 3.1 | U | 0.0 | 0.6 |
| 75 |       | with                | 08 | 87 | 61 | 68 | 08 | 78 | 636 | 615 | 63  | p | 23  | 63  |
|    |       | immunoglobulin-li   | 40 | 73 | 38 | 20 | 91 | 87 | 353 | 833 | 63  |   | 96  | 32  |
|    |       | ke and EGF-like     | 5  | 7  | 6  | 8  | 9  | 6  | 79  | 33  | 53  |   | 15  | 74  |

|    |     |                    |    |    |    |    |    |    |     |     |     |   |     |     |
|----|-----|--------------------|----|----|----|----|----|----|-----|-----|-----|---|-----|-----|
|    |     | domains 1          |    |    |    |    |    |    |     |     | 79  |   | 57  | 04  |
| 17 | NQO | NAD(P)H            | 11 | 12 | 11 | 10 | 11 | 11 | -1. | -0. | 1.9 | D | 0.0 | 0.6 |
| 28 | 1   | dehydrogenase,     | .8 | .0 | .8 | .0 | .3 | .5 | 918 | 940 | 18  | o | 38  | 63  |
|    |     | quinone 1          | 66 | 74 | 13 | 72 | 55 | 05 | 967 | 33  | 96  | w | 92  | 32  |
|    |     |                    | 23 | 78 | 93 | 76 | 29 | 9  | 13  |     | 71  | n | 25  | 74  |
|    |     |                    |    |    |    |    |    |    |     |     | 3   |   | 64  | 04  |
| 39 | COL | Colorectal cancer  | 7. | 7. | 7. | 6. | 6. | 7. | -1. | -0. | 1.5 | D | 0.0 | 0.6 |
| 99 | CA1 | associated 1       | 71 | 30 | 38 | 40 | 80 | 26 | 563 | 644 | 63  | o | 36  | 63  |
| 48 |     |                    | 55 | 62 | 77 | 90 | 28 | 31 | 576 | 85  | 57  | w | 82  | 32  |
|    |     |                    | 9  |    | 7  | 1  | 3  | 7  | 709 |     | 67  | n | 09  | 74  |
|    |     |                    |    |    |    |    |    |    |     |     | 09  |   | 11  | 04  |
| 97 | PTD | Phosphatidylserine | 5. | 5. | 5. | 6. | 5. | 6. | 1.6 | 0.7 | 1.6 | U | 0.0 | 0.6 |
| 91 | SS1 | synthase 1         | 10 | 08 | 73 | 46 | 55 | 05 | 455 | 185 | 45  | p | 42  | 63  |
|    |     |                    | 38 | 47 | 52 | 91 | 63 | 38 | 197 | 433 | 51  |   | 47  | 32  |
|    |     |                    | 3  | 4  | 1  | 3  | 9  | 9  | 4   | 33  | 97  |   | 06  | 74  |
|    |     |                    |    |    |    |    |    |    |     |     | 4   |   | 12  | 04  |
| 85 | DIX | DIX domain         | 5. | 6. | 6. | 8. | 7. | 6. | 2.6 | 1.4 | 2.6 | U | 0.0 | 0.6 |
| 45 | DC1 | containing 1       | 81 | 70 | 44 | 58 | 67 | 91 | 485 | 051 | 48  | p | 14  | 63  |
| 8  |     |                    | 87 | 09 | 25 | 78 | 90 | 08 | 021 | 766 | 50  |   | 94  | 32  |
|    |     |                    | 1  | 3  | 7  | 7  | 6  | 1  | 26  | 67  | 21  |   | 38  | 74  |
|    |     |                    |    |    |    |    |    |    |     |     | 26  |   | 33  | 04  |
| 53 | BCL | B-cell             | 6. | 6. | 6. | 5. | 5. | 6. | -1. | -0. | 1.5 | D | 0.0 | 0.6 |
| 33 | 11A | CLL/lymphoma       | 39 | 40 | 72 | 40 | 84 | 28 | 585 | 665 | 85  | o | 33  | 63  |
| 5  |     | 11A (zinc finger   | 73 | 44 | 35 | 03 | 18 | 79 | 648 | 073 | 64  | w | 18  | 32  |
|    |     | protein)           | 5  | 6  |    | 2  | 1  | 6  | 871 | 333 | 88  | n | 64  | 74  |
|    |     |                    |    |    |    |    |    |    |     |     | 71  |   | 98  | 04  |
| 91 | NMI | N-myc and STAT     | 5. | 4. | 5. | 6. | 5. | 5. | 1.6 | 0.6 | 1.6 | U | 0.0 | 0.6 |
| 11 |     | interactor         | 07 | 43 | 18 | 01 | 15 | 60 | 193 | 954 | 19  | p | 47  | 63  |
|    |     |                    | 36 | 33 | 51 | 67 | 56 | 59 | 595 | 233 | 35  |   | 33  | 32  |

|                |            |                                                                       |                     |                     |                     |                     |                     |                     |                         |                         |                             |        |                             |                             |
|----------------|------------|-----------------------------------------------------------------------|---------------------|---------------------|---------------------|---------------------|---------------------|---------------------|-------------------------|-------------------------|-----------------------------|--------|-----------------------------|-----------------------------|
|                |            |                                                                       |                     | 2                   | 6                   | 4                   | 9                   | 2                   | 36                      | 33                      | 95                          |        | 43                          | 74                          |
|                |            |                                                                       |                     |                     |                     |                     |                     |                     |                         |                         | 36                          |        | 02                          | 04                          |
| 84<br>25       | LTBP<br>4  | Latent transforming growth factor $\beta$ binding protein 4           | 6.<br>73<br>31<br>7 | 7.<br>50<br>89<br>6 | 7.<br>50<br>66<br>2 | 8.<br>87<br>36<br>6 | 8.<br>60<br>44<br>2 | 8.<br>02<br>92<br>5 | 2.3<br>831<br>338<br>77 | 1.2<br>528<br>6         | 2.3<br>83<br>13<br>38<br>77 | U<br>p | 0.0<br>04<br>40<br>91<br>32 | 0.6<br>63<br>32<br>74<br>04 |
| 64<br>17<br>00 | ECS<br>CR  | Endothelial cell surface expressed chemotaxis and apoptosis regulator | 4.<br>61<br>15<br>7 | 4.<br>89<br>91<br>7 | 5.<br>00<br>50<br>7 | 6.<br>19<br>59<br>9 | 6.<br>96<br>86<br>5 | 5.<br>23<br>18<br>8 | 2.4<br>513<br>786<br>28 | 1.2<br>935<br>933<br>33 | 2.4<br>51<br>37<br>86<br>28 | U<br>p | 0.0<br>16<br>38<br>62<br>86 | 0.6<br>63<br>32<br>74<br>04 |
| 84<br>07       | TAG<br>LN2 | Transgelin 2                                                          | 7.<br>98<br>11<br>6 | 7.<br>87<br>09<br>7 | 8.<br>68<br>28      | 9.<br>48<br>3<br>24 | 9.<br>12<br>24      | 8.<br>72<br>21<br>4 | 1.9<br>064<br>252<br>97 | 0.9<br>308<br>7         | 1.9<br>06<br>42<br>52<br>97 | U<br>p | 0.0<br>14<br>29<br>30<br>84 | 0.6<br>63<br>32<br>74<br>04 |
| 37<br>64       | KCN<br>J8  | Potassium channel, inwardly rectifying subfamily J, member 8          | 3.<br>25<br>74<br>9 | 4.<br>29<br>34<br>4 | 3.<br>40<br>87<br>8 | 4.<br>84<br>77<br>5 | 4.<br>81<br>82<br>6 | 4.<br>42<br>63      | 2.0<br>622<br>225<br>03 | 1.0<br>442              | 2.0<br>62<br>22<br>25<br>03 | U<br>p | 0.0<br>08<br>25<br>05<br>36 | 0.6<br>63<br>32<br>74<br>04 |
| 90<br>95<br>2  | ESA<br>M   | Endothelial cell adhesion molecule                                    | 5.<br>85<br>25<br>4 | 6.<br>59<br>79<br>7 | 6.<br>56<br>52<br>6 | 7.<br>65<br>70<br>8 | 8.<br>10<br>47<br>2 | 6.<br>60<br>02<br>5 | 2.1<br>665<br>907<br>5  | 1.1<br>154<br>266<br>67 | 2.1<br>66<br>59<br>07<br>5  | U<br>p | 0.0<br>29<br>12<br>66<br>61 | 0.6<br>63<br>32<br>74<br>04 |
| 10<br>20       | INA<br>DL  | Inad-like (Drosophila)                                                | 7.<br>26            | 7.<br>06            | 7.<br>39            | 6.<br>01            | 6.<br>47            | 7.<br>08            | -1.<br>641              | -0.<br>715              | 1.6<br>41                   | D<br>o | 0.0<br>38                   | 0.6<br>63                   |

|    |      |                                   |    |    |    |    |    |    |     |     |     |   |     |     |
|----|------|-----------------------------------|----|----|----|----|----|----|-----|-----|-----|---|-----|-----|
| 7  |      |                                   | 80 | 27 | 63 | 80 | 87 | 54 | 490 | 006 | 49  | w | 51  | 32  |
|    |      |                                   | 8  | 8  | 6  | 3  | 5  | 2  | 803 | 667 | 08  | n | 91  | 74  |
|    |      |                                   |    |    |    |    |    |    |     |     | 03  |   | 66  | 04  |
| 56 | NXF  | Nuclear RNA                       | 8. | 8. | 8. | 6. | 7. | 7. | -2. | -1. | 2.2 | D | 0.0 | 0.6 |
| 00 | 3    | export factor 3                   | 25 | 49 | 24 | 06 | 98 | 35 | 293 | 197 | 93  | o | 33  | 63  |
| 0  |      |                                   | 20 | 84 | 83 | 17 | 63 | 73 | 869 | 783 | 86  | w | 38  | 32  |
|    |      |                                   | 1  |    | 9  | 7  | 8  |    | 525 | 333 | 95  | n | 24  | 74  |
|    |      |                                   |    |    |    |    |    |    |     |     | 25  |   | 09  | 04  |
| 35 | IL3R | Interleukin 3                     | 4. | 5. | 4. | 5. | 6. | 4. | 1.8 | 0.9 | 1.8 | U | 0.0 | 0.6 |
| 63 | A    | receptor, $\alpha$ (low affinity) | 52 | 15 | 39 | 88 | 09 | 81 | 814 | 118 | 81  | p | 43  | 63  |
|    |      |                                   | 45 | 03 | 02 | 61 | 56 | 88 | 391 | 366 | 43  |   | 39  | 32  |
|    |      |                                   | 5  | 8  |    | 1  | 4  | 9  | 98  | 67  | 91  |   | 76  | 74  |
|    |      |                                   |    |    |    |    |    |    |     |     | 98  |   | 54  | 04  |
| 92 | MSC  | Musculin                          | 4. | 4. | 4. | 5. | 4. | 4. | 1.7 | 0.8 | 1.7 | U | 0.0 | 0.6 |
| 42 |      |                                   | 21 | 67 | 00 | 56 | 94 | 87 | 761 | 287 | 76  | p | 13  | 63  |
|    |      |                                   | 79 | 01 | 47 | 59 | 19 | 12 | 827 | 8   | 18  |   | 86  | 32  |
|    |      |                                   |    | 2  | 5  | 4  | 7  |    | 17  |     | 27  |   | 68  | 74  |
|    |      |                                   |    |    |    |    |    |    |     |     | 17  |   | 58  | 04  |
| 22 | RHO  | Rho-related BTB                   | 4. | 5. | 5. | 7. | 7. | 5. | 3.0 | 1.6 | 3.0 | U | 0.0 | 0.6 |
| 83 | BTB  | domain containing                 | 95 | 46 | 44 | 68 | 12 | 86 | 346 | 015 | 34  | p | 09  | 63  |
| 6  | 3    | 3                                 | 36 | 45 | 99 | 16 | 87 | 23 | 777 | 433 | 67  |   | 00  | 32  |
|    |      |                                   | 8  | 4  | 3  | 5  | 7  | 6  | 65  | 33  | 77  |   | 41  | 74  |
|    |      |                                   |    |    |    |    |    |    |     |     | 65  |   | 56  | 04  |
| 35 | IGH  | Immunoglobulin                    | 6. | 6. | 7. | 7. | 9. | 10 | 4.7 | 2.2 | 4.7 | U | 0.0 | 0.6 |
| 07 | M    | heavy constant mu                 | 67 | 66 | 50 | 34 | 84 | .3 | 094 | 355 | 09  | p | 20  | 63  |
|    |      |                                   | 26 | 09 | 02 | 03 | 44 | 55 | 328 | 533 | 43  |   | 09  | 32  |
|    |      |                                   | 4  | 2  |    | 6  | 3  | 63 | 65  | 33  | 28  |   | 19  | 74  |
|    |      |                                   |    |    |    |    |    |    |     |     | 65  |   | 67  | 04  |
| 97 | FAM  | Family with                       | 3. | 3. | 3. | 4. | 4. | 4. | 1.9 | 0.9 | 1.9 | U | 0.0 | 0.6 |

|               |            |                                                 |                      |                     |                      |                      |                      |                      |                         |                         |                             |                  |                             |                             |
|---------------|------------|-------------------------------------------------|----------------------|---------------------|----------------------|----------------------|----------------------|----------------------|-------------------------|-------------------------|-----------------------------|------------------|-----------------------------|-----------------------------|
| 50            | 65B        | sequence similarity<br>65 member B              | 52<br>06<br>6        | 35<br>94<br>7       | 89<br>87<br>2        | 87<br>45<br>2        | 70<br>23<br>4        | 15<br>3              | 774<br>894<br>53        | 836<br>7                | 77<br>48<br>94<br>53        | p                | 03<br>72<br>62<br>41        | 63<br>32<br>74<br>04        |
| 10<br>35<br>1 | ABC<br>A8  | ATP binding<br>cassette subfamily<br>A member 8 | 6.<br>59<br>44<br>6  | 6.<br>97<br>30<br>2 | 7.<br>82<br>84<br>4  | 8.<br>78<br>69<br>2  | 8.<br>31<br>05<br>2  | 7.<br>81<br>51       | 2.2<br>535<br>508<br>44 | 1.1<br>722              | 2.2<br>53<br>55<br>08<br>44 | U<br>p           | 0.0<br>16<br>44<br>49<br>48 | 0.6<br>63<br>32<br>74<br>04 |
| 31<br>2       | ANX<br>A13 | Annexin A13                                     | 12<br>.2<br>40<br>38 | 12<br>.0<br>54<br>6 | 12<br>.1<br>94<br>28 | 10<br>.5<br>27<br>11 | 11<br>.6<br>13<br>55 | 11<br>.8<br>09<br>49 | -1.<br>797<br>971<br>31 | -0.<br>846<br>37        | 1.7<br>97<br>97<br>13<br>1  | D<br>o<br>w<br>n | 0.0<br>36<br>89<br>47<br>54 | 0.6<br>63<br>32<br>74<br>04 |
| 63<br>83      | SDC<br>2   | Syndecan 2                                      | 3.<br>69<br>49<br>6  | 4.<br>00<br>16<br>5 | 4.<br>30<br>38<br>5  | 6.<br>63<br>07<br>3  | 4.<br>71<br>46<br>6  | 5.<br>47<br>77<br>6  | 3.0<br>474<br>023<br>66 | 1.6<br>075<br>8         | 3.0<br>47<br>40<br>23<br>66 | U<br>p           | 0.0<br>09<br>85<br>32<br>52 | 0.6<br>63<br>32<br>74<br>04 |
| 62<br>36      | RRA<br>D   | Ras-related<br>associated with<br>diabetes      | 5.<br>77<br>70<br>7  | 5.<br>49<br>40<br>4 | 5.<br>23<br>41<br>9  | 6.<br>90<br>33<br>9  | 6.<br>44<br>79<br>9  | 5.<br>83<br>52<br>33 | 1.8<br>580<br>122<br>33 | 0.8<br>937<br>6         | 1.8<br>58<br>01<br>22<br>33 | U<br>p           | 0.0<br>19<br>38<br>09<br>07 | 0.6<br>63<br>32<br>74<br>04 |
| 86<br>54      | PDE<br>5A  | Phosphodiesterase<br>5A                         | 7.<br>80<br>42<br>1  | 7.<br>57<br>65<br>2 | 8.<br>16<br>2        | 8.<br>99<br>75<br>6  | 8.<br>84<br>61<br>5  | 8.<br>05<br>30<br>1  | 1.7<br>226<br>902<br>66 | 0.7<br>846<br>633<br>33 | 1.7<br>22<br>69<br>02<br>66 | U<br>p           | 0.0<br>30<br>32<br>04<br>96 | 0.6<br>63<br>32<br>74<br>04 |

|    |      |                     |    |    |    |    |    |    |     |     |     |   |     |     |
|----|------|---------------------|----|----|----|----|----|----|-----|-----|-----|---|-----|-----|
| 25 | KAN  | KN motif and        | 4. | 5. | 4. | 5. | 5. | 5. | 1.5 | 0.6 | 1.5 | U | 0.0 | 0.6 |
| 69 | K3   | ankyrin repeat      | 47 | 14 | 79 | 43 | 65 | 23 | 561 | 380 | 56  | p | 21  | 63  |
| 49 |      | domains 3           | 25 | 75 | 06 | 19 | 78 | 50 | 811 | 1   | 18  |   | 62  | 32  |
|    |      |                     | 3  | 3  | 9  |    | 3  | 5  | 4   |     | 11  |   | 45  | 74  |
|    |      |                     |    |    |    |    |    |    |     |     | 4   |   | 22  | 04  |
| 54 | ROB  | Roundabout          | 6. | 7. | 7. | 8. | 8. | 7. | 2.3 | 1.2 | 2.3 | U | 0.0 | 0.6 |
| 53 | O4   | guidance receptor 4 | 31 | 85 | 50 | 71 | 85 | 84 | 762 | 487 | 76  | p | 26  | 63  |
| 8  |      |                     | 43 | 21 | 85 | 92 | 38 | 81 | 830 | 066 | 28  |   | 60  | 32  |
|    |      |                     | 3  | 5  | 7  | 4  |    | 3  | 08  | 67  | 30  |   | 32  | 74  |
|    |      |                     |    |    |    |    |    |    |     |     | 08  |   | 16  | 04  |
| 21 | ETS1 | V-ets avian         | 6. | 7. | 7. | 9. | 9. | 7. | 2.5 | 1.3 | 2.5 | U | 0.0 | 0.6 |
| 13 |      | erythroblastosis    | 71 | 59 | 71 | 16 | 09 | 86 | 795 | 671 | 79  | p | 14  | 63  |
|    |      | virus E26           | 98 | 18 | 51 | 59 | 98 | 25 | 629 | 266 | 56  |   | 05  | 32  |
|    |      | oncogene homolog    | 8  | 5  | 9  |    | 3  | 7  | 73  | 67  | 29  |   | 97  | 74  |
|    |      | 1                   |    |    |    |    |    |    |     |     | 73  |   | 99  | 04  |
| 10 | FER  | Fermitin family     | 4. | 4. | 4. | 6. | 5. | 5. | 1.8 | 0.8 | 1.8 | U | 0.0 | 0.6 |
| 97 | MT2  | member 2            | 44 | 53 | 87 | 12 | 04 | 35 | 573 | 932 | 57  | p | 18  | 63  |
| 9  |      |                     | 49 | 44 | 06 | 98 | 27 | 70 | 169 | 2   | 31  |   | 50  | 32  |
|    |      |                     | 1  | 7  | 2  | 5  | 7  | 4  | 1   |     | 69  |   | 80  | 74  |
|    |      |                     |    |    |    |    |    |    |     |     | 1   |   | 95  | 04  |
| 48 | NPR  | Natriuretic peptide | 5. | 5. | 5. | 6. | 8. | 7. | 3.2 | 1.7 | 3.2 | U | 0.0 | 0.6 |
| 83 | 3    | receptor 3          | 69 | 92 | 41 | 62 | 27 | 28 | 792 | 133 | 79  | p | 03  | 63  |
|    |      |                     | 33 | 92 | 26 | 32 | 09 | 10 | 820 | 8   | 28  |   | 79  | 32  |
|    |      |                     | 6  |    |    | 9  | 3  | 8  | 66  |     | 20  |   | 72  | 74  |
|    |      |                     |    |    |    |    |    |    |     |     | 66  |   | 39  | 04  |
| 58 | MS4  | Membrane-spanning   | 5. | 6. | 6. | 8. | 7. | 7. | 2.2 | 1.1 | 2.2 | U | 0.0 | 0.6 |
| 47 | A7   | g 4-domains,        | 96 | 74 | 46 | 06 | 47 | 14 | 391 | 629 | 39  | p | 06  | 63  |
| 5  |      | subfamily A,        | 71 | 91 | 71 | 00 | 01 | 20 | 223 | 333 | 12  |   | 09  | 32  |
|    |      | member 7            | 9  | 2  | 4  | 5  | 5  | 5  | 05  | 33  | 23  |   | 22  | 74  |

|               |                  |                                                                    |                     |                     |                     |                       |                     |                      |                          |                          |                             |                  |                             |                             |
|---------------|------------------|--------------------------------------------------------------------|---------------------|---------------------|---------------------|-----------------------|---------------------|----------------------|--------------------------|--------------------------|-----------------------------|------------------|-----------------------------|-----------------------------|
|               |                  |                                                                    |                     |                     |                     |                       |                     |                      |                          |                          | 05                          |                  | 76                          | 04                          |
| 56<br>63      | PSE<br>N1        | Presenilin 1                                                       | 9.<br>91<br>89<br>5 | 9.<br>76<br>75<br>9 | 9.<br>43<br>88<br>5 | 8.<br>83<br>6         | 9.<br>10<br>56<br>2 | 9.<br>20<br>46<br>6  | -1.<br>579<br>757<br>739 | -0.<br>659<br>703<br>333 | 1.5<br>79<br>75<br>77<br>39 | D<br>o<br>w<br>n | 0.0<br>10<br>40<br>03<br>18 | 0.6<br>63<br>32<br>74<br>04 |
| 31<br>13      | HLA<br>-DPA<br>1 | Major<br>histocompatibility<br>complex, class II,<br>DP $\alpha$ 1 | 8.<br>49<br>90<br>1 | 9.<br>09<br>00<br>6 | 9.<br>17<br>42      | 10.<br>.1<br>80<br>08 | 9.<br>60<br>6<br>2  | 9.<br>76<br>02<br>86 | 1.9<br>022<br>101<br>86  | 0.9<br>276<br>766<br>67  | 1.9<br>02<br>21<br>01<br>86 | U<br>p           | 0.0<br>06<br>89<br>59<br>31 | 0.6<br>63<br>32<br>74<br>04 |
| 23<br>27      | FMO<br>2         | Flavin containing<br>monooxygenase 2                               | 4.<br>05<br>29<br>2 | 4.<br>53<br>01<br>7 | 4.<br>85<br>33      | 5.<br>72<br>96<br>1   | 5.<br>28<br>46<br>1 | 4.<br>98<br>81<br>2  | 1.8<br>091<br>558<br>15  | 0.8<br>553<br>166<br>67  | 1.8<br>09<br>15<br>58<br>15 | U<br>p           | 0.0<br>15<br>87<br>13<br>07 | 0.6<br>63<br>32<br>74<br>04 |
| 36<br>80      | ITG<br>A9        | Integrin $\alpha$ 9                                                | 2.<br>67<br>88<br>9 | 5.<br>16<br>34<br>1 | 3.<br>72<br>85<br>9 | 7.<br>16<br>16<br>8   | 4.<br>98<br>07<br>5 | 5.<br>10<br>36<br>2  | 3.7<br>107<br>736<br>45  | 1.8<br>917<br>2<br>45    | 3.7<br>10<br>77<br>36<br>45 | U<br>p           | 0.0<br>44<br>10<br>40<br>72 | 0.6<br>63<br>32<br>74<br>04 |
| 46<br>64      | NAB<br>1         | NGFI-A binding<br>protein 1                                        | 6.<br>33<br>15<br>5 | 5.<br>78<br>54<br>9 | 6.<br>16<br>49<br>8 | 7.<br>78<br>50<br>9   | 7.<br>01<br>45<br>5 | 6.<br>36<br>86<br>6  | 1.9<br>481<br>345<br>65  | 0.9<br>620<br>933<br>33  | 1.9<br>48<br>13<br>45<br>65 | U<br>p           | 0.0<br>31<br>94<br>84<br>38 | 0.6<br>63<br>32<br>74<br>04 |
| 57<br>47<br>4 | ZNF<br>490       | Zinc finger protein<br>490                                         | 5.<br>46<br>30      | 5.<br>72<br>11      | 5.<br>51<br>10      | 4.<br>98<br>07        | 4.<br>39<br>23      | 5.<br>16<br>55       | -1.<br>645<br>934        | -0.<br>718<br>906        | 1.6<br>45<br>93             | D<br>o<br>w      | 0.0<br>15<br>89             | 0.6<br>63<br>32             |



|    |     |                    |    |    |    |    |    |    |     |     |     |   |     |     |
|----|-----|--------------------|----|----|----|----|----|----|-----|-----|-----|---|-----|-----|
|    |     |                    | 6  | 4  | 7  |    | 5  |    | 205 | 667 | 42  | n | 03  | 74  |
|    |     |                    |    |    |    |    |    |    |     |     | 05  |   | 44  | 04  |
| 22 | ADG | Adhesion G         | 4. | 5. | 6. | 7. | 8. | 6. | 4.8 | 2.2 | 4.8 | U | 0.0 | 0.6 |
| 13 | RF5 | protein-coupled    | 46 | 30 | 14 | 87 | 42 | 47 | 747 | 853 | 74  | p | 06  | 63  |
| 95 |     | receptor F5        | 53 | 97 | 61 | 53 | 79 | 40 | 784 | 366 | 77  |   | 01  | 32  |
|    |     |                    | 5  | 5  | 2  | 2  |    | 1  | 98  | 67  | 84  |   | 35  | 74  |
|    |     |                    |    |    |    |    |    |    |     |     | 98  |   | 84  | 04  |
| 57 | THO | THO complex 2      | 7. | 7. | 6. | 6. | 6. | 6. | -1. | -0. | 1.5 | D | 0.0 | 0.6 |
| 18 | C2  |                    | 36 | 29 | 98 | 42 | 85 | 53 | 524 | 607 | 24  | o | 15  | 63  |
| 7  |     |                    | 16 | 18 | 96 | 53 | 53 | 87 | 007 | 87  | 00  | w | 07  | 32  |
|    |     |                    | 9  |    | 1  | 4  | 6  | 9  | 497 |     | 74  | n | 84  | 74  |
|    |     |                    |    |    |    |    |    |    |     |     | 97  |   | 68  | 04  |
| 11 | MST | Macrophage         | 7. | 5. | 6. | 4. | 4. | 6. | -3. | -1. | 3.1 | D | 0.0 | 0.6 |
| 22 | IL  | stimulating 1-like | 83 | 90 | 13 | 57 | 20 | 19 | 104 | 634 | 04  | o | 44  | 63  |
| 3  |     |                    | 79 | 32 | 64 | 05 | 38 | 99 | 670 | 44  | 67  | w | 13  | 32  |
|    |     |                    | 7  | 9  |    | 6  | 3  | 5  | 15  |     | 01  | n | 69  | 74  |
|    |     |                    |    |    |    |    |    |    |     |     | 5   |   | 92  | 04  |
| 64 | SMI | Small integral     | 3. | 4. | 4. | 6. | 6. | 5. | 4.4 | 2.1 | 4.4 | U | 0.0 | 0.6 |
| 45 | M10 | membrane protein   | 76 | 53 | 30 | 87 | 83 | 31 | 154 | 425 | 15  | p | 01  | 63  |
| 38 |     | 10                 | 9  | 05 | 57 | 57 | 83 | 88 | 077 | 466 | 40  |   | 88  | 32  |
|    |     |                    |    | 7  | 7  | 8  | 2  | 8  | 32  | 67  | 77  |   | 41  | 74  |
|    |     |                    |    |    |    |    |    |    |     |     | 32  |   | 46  | 04  |
| 71 | CLD | Claudin 5          | 5. | 6. | 6. | 8. | 8. | 6. | 2.6 | 1.4 | 2.6 | U | 0.0 | 0.6 |
| 22 | N5  |                    | 82 | 36 | 41 | 13 | 14 | 52 | 402 | 006 | 40  | p | 17  | 63  |
|    |     |                    | 49 | 09 | 73 | 40 | 97 | 15 | 599 | 8   | 25  |   | 62  | 32  |
|    |     |                    | 2  | 7  | 7  | 4  | 2  | 4  | 89  |     | 99  |   | 51  | 74  |
|    |     |                    |    |    |    |    |    |    |     |     | 89  |   | 86  | 04  |
| 22 | FHL | Four and a half    | 4. | 6. | 5. | 8. | 6. | 6. | 4.1 | 2.0 | 4.1 | U | 0.0 | 0.6 |
| 73 | 1   | LIM domains 1      | 16 | 00 | 74 | 36 | 70 | 98 | 365 | 484 | 36  | p | 11  | 63  |

|    |     |                   |    |    |    |    |    |    |     |     |     |   |     |     |
|----|-----|-------------------|----|----|----|----|----|----|-----|-----|-----|---|-----|-----|
|    |     |                   | 66 | 21 | 94 | 88 | 83 | 62 | 556 | 3   | 55  |   | 04  | 32  |
|    |     |                   | 5  | 6  | 2  | 6  | 9  | 7  | 75  |     | 56  |   | 23  | 74  |
|    |     |                   |    |    |    |    |    |    |     |     | 75  |   | 68  | 04  |
| 11 | C1Q | C1q and tumor     | 3. | 4. | 3. | 7. | 4. | 4. | 3.8 | 1.9 | 3.8 | U | 0.0 | 0.6 |
| 49 | TNF | necrosis factor   | 07 | 56 | 76 | 52 | 84 | 82 | 096 | 296 | 09  | p | 39  | 63  |
| 05 | 7   | related protein 7 | 39 | 93 | 09 | 57 | 26 | 48 | 188 | 466 | 61  |   | 09  | 32  |
|    |     |                   | 5  | 5  | 9  | 8  | 5  |    | 57  | 67  | 88  |   | 74  | 74  |
|    |     |                   |    |    |    |    |    |    |     |     | 57  |   | 71  | 04  |
| 57 | HEG | Heart development | 5. | 7. | 6. | 9. | 8. | 7. | 3.5 | 1.8 | 3.5 | U | 0.0 | 0.6 |
| 49 | 1   | protein with      | 91 | 36 | 78 | 88 | 33 | 37 | 950 | 459 | 95  | p | 25  | 63  |
| 3  |     | EGF-like domains  | 11 | 62 | 33 | 51 | 57 | 78 | 038 | 933 | 00  |   | 33  | 32  |
|    |     | 1                 | 3  | 8  | 2  | 5  | 1  | 5  | 94  | 33  | 38  |   | 43  | 74  |
|    |     |                   |    |    |    |    |    |    |     |     | 94  |   | 46  | 04  |
| 13 | PAC | PARK2             | 5. | 5. | 5. | 4. | 4. | 5. | -1. | -0. | 1.8 | D | 0.0 | 0.6 |
| 51 | RG  | co-regulated      | 87 | 70 | 77 | 53 | 93 | 14 | 887 | 916 | 87  | o | 02  | 63  |
| 38 |     |                   | 31 | 71 | 82 | 05 | 38 | 51 | 268 | 3   | 26  | w | 11  | 32  |
|    |     |                   | 1  |    | 7  | 7  | 9  | 2  | 908 |     | 89  | n | 30  | 74  |
|    |     |                   |    |    |    |    |    |    |     |     | 08  |   | 64  | 04  |
| 49 | OGN | Osteoglycin       | 3. | 5. | 5. | 7. | 5. | 6. | 2.9 | 1.5 | 2.9 | U | 0.0 | 0.6 |
| 69 |     |                   | 97 | 74 | 57 | 87 | 98 | 13 | 605 | 658 | 60  | p | 44  | 63  |
|    |     |                   | 95 | 51 | 00 | 40 | 80 | 02 | 050 | 433 | 50  |   | 06  | 32  |
|    |     |                   | 6  | 9  | 7  | 5  | 4  | 6  | 88  | 33  | 50  |   | 54  | 74  |
|    |     |                   |    |    |    |    |    |    |     |     | 88  |   | 83  | 04  |
| 37 | PNP | Patatin like      | 7. | 8. | 7. | 7. | 7. | 7. | -1. | -0. | 1.5 | D | 0.0 | 0.6 |
| 57 | LA7 | phospholipase     | 95 | 30 | 68 | 22 | 39 | 32 | 588 | 667 | 88  | o | 11  | 63  |
| 75 |     | domain containing | 67 | 51 | 77 | 69 | 52 | 55 | 105 | 306 | 10  | w | 39  | 32  |
|    |     | 7                 | 7  | 5  | 4  | 4  | 5  | 5  | 402 | 667 | 54  | n | 75  | 74  |
|    |     |                   |    |    |    |    |    |    |     |     | 02  |   | 44  | 04  |
| 27 | DKK | Dickkopf WNT      | 5. | 7. | 6. | 10 | 8. | 7. | 4.9 | 2.3 | 4.9 | U | 0.0 | 0.6 |

|    |      |                         |    |    |    |    |    |    |     |     |     |   |     |     |
|----|------|-------------------------|----|----|----|----|----|----|-----|-----|-----|---|-----|-----|
| 12 | 3    | signaling pathway       | 59 | 48 | 33 | .2 | 13 | 94 | 623 | 110 | 62  | p | 14  | 63  |
| 2  |      | inhibitor 3             | 99 | 47 | 92 | 78 | 69 | 16 | 838 | 333 | 38  |   | 29  | 32  |
|    |      |                         | 7  | 4  | 5  | 53 |    | 3  | 45  | 33  | 38  |   | 58  | 74  |
|    |      |                         |    |    |    |    |    |    |     |     | 45  |   | 97  | 04  |
| 23 | FOS  | FBJ murine              | 5. | 5. | 6. | 7. | 10 | 8. | 8.6 | 3.1 | 8.6 | U | 0.0 | 0.6 |
| 54 | B    | osteosarcoma viral      | 99 | 46 | 04 | 94 | .1 | 72 | 902 | 194 | 90  | p | 00  | 63  |
|    |      | oncogene homolog        | 76 | 22 | 61 | 62 | 93 | 49 | 639 |     | 26  |   | 64  | 32  |
|    |      | B                       | 8  | 2  | 6  | 5  | 02 | 9  | 69  |     | 39  |   | 06  | 74  |
|    |      |                         |    |    |    |    |    |    |     |     | 69  |   | 89  | 04  |
| 81 | CAL  | Calumenin               | 5. | 4. | 5. | 7. | 5. | 5. | 2.2 | 1.1 | 2.2 | U | 0.0 | 0.6 |
| 3  | U    |                         | 43 | 57 | 57 | 19 | 94 | 86 | 066 | 418 | 06  | p | 30  | 63  |
|    |      |                         | 42 | 40 | 05 | 51 | 31 | 61 | 686 | 7   | 66  |   | 99  | 32  |
|    |      |                         | 4  | 9  | 8  | 9  | 4  | 9  | 3   |     | 86  |   | 21  | 74  |
|    |      |                         |    |    |    |    |    |    |     |     | 3   |   | 47  | 04  |
| 96 | GNA  | Guanine nucleotide      | 2. | 3. | 3. | 5. | 3. | 3. | 2.1 | 1.1 | 2.1 | U | 0.0 | 0.6 |
| 30 | 14   | binding protein (G      | 69 | 56 | 32 | 04 | 89 | 96 | 561 | 084 | 56  | p | 17  | 63  |
|    |      | protein), $\alpha$ 14   | 52 | 24 | 34 | 51 | 65 | 49 | 586 | 633 | 15  |   | 07  | 32  |
|    |      |                         | 2  | 8  | 8  |    | 2  | 5  | 47  | 33  | 86  |   | 56  | 74  |
|    |      |                         |    |    |    |    |    |    |     |     | 47  |   | 69  | 04  |
| 28 | IGK  | Immunoglobulin $\kappa$ | 5. | 4. | 5. | 6. | 9. | 8. | 6.6 | 2.7 | 6.6 | U | 0.0 | 0.6 |
| 93 | V1-2 | variable 1-27           | 42 | 89 | 48 | 01 | 11 | 90 | 900 | 420 | 90  | p | 09  | 63  |
| 5  | 7    |                         | 99 | 86 | 02 | 56 | 58 | 33 | 175 | 1   | 01  |   | 79  | 32  |
|    |      |                         | 9  | 3  | 1  | 4  | 5  | 7  | 71  |     | 75  |   | 54  | 74  |
|    |      |                         |    |    |    |    |    |    |     |     | 71  |   | 34  | 04  |
| 12 | FRM  | FERM domain             | 4. | 5. | 4. | 7. | 6. | 6. | 3.4 | 1.8 | 3.4 | U | 0.0 | 0.6 |
| 27 | D6   | containing 6            | 26 | 69 | 77 | 47 | 30 | 37 | 940 | 049 | 94  | p | 04  | 63  |
| 86 |      |                         | 86 | 12 | 52 | 37 | 37 | 24 | 978 | 2   | 09  |   | 91  | 32  |
|    |      |                         | 1  | 5  | 7  | 1  | 5  | 3  | 24  |     | 78  |   | 68  | 74  |
|    |      |                         |    |    |    |    |    |    |     |     | 24  |   | 68  | 04  |

|    |       |                             |    |    |    |    |    |    |     |     |     |   |     |     |
|----|-------|-----------------------------|----|----|----|----|----|----|-----|-----|-----|---|-----|-----|
| 78 | COL   | Collectin                   | 6. | 8. | 6. | 9. | 9. | 9. | 3.7 | 1.9 | 3.7 | U | 0.0 | 0.6 |
| 98 | EC11  | subfamily member            | 64 | 44 | 83 | 44 | 01 | 19 | 667 | 133 | 66  | p | 04  | 63  |
| 9  |       | 11                          | 16 | 16 | 24 | 23 | 81 | 53 | 840 | 333 | 78  |   | 30  | 32  |
|    |       |                             | 6  | 6  | 8  | 7  | 1  | 2  | 7   | 33  | 40  |   | 59  | 74  |
|    |       |                             |    |    |    |    |    |    |     |     | 7   |   | 79  | 04  |
| 34 | IFI16 | Interferon,                 | 6. | 6. | 7. | 7. | 8. | 7. | 1.7 | 0.8 | 1.7 | U | 0.0 | 0.6 |
| 28 |       | $\gamma$ -inducible protein | 64 | 74 | 40 | 85 | 16 | 26 | 790 | 311 | 79  | p | 28  | 63  |
|    |       | 16                          | 06 | 51 | 78 | 48 | 67 | 54 | 577 | 133 | 05  |   | 75  | 32  |
|    |       |                             | 8  | 7  | 6  | 7  | 7  | 1  | 38  | 33  | 77  |   | 47  | 74  |
|    |       |                             |    |    |    |    |    |    |     |     | 38  |   | 32  | 04  |
| 52 | SER   | Serpin peptidase            | 6. | 7. | 6. | 5. | 5. | 6. | -1. | -0. | 1.6 | D | 0.0 | 0.6 |
| 70 | PINE  | inhibitor, clade E          | 41 | 11 | 47 | 66 | 70 | 46 | 648 | 721 | 48  | o | 44  | 63  |
|    | 2     | (nexin,                     | 04 | 51 | 40 | 69 | 42 | 40 | 872 | 48  | 87  | w | 00  | 32  |
|    |       | plasminogen                 | 6  | 8  | 6  |    | 7  | 9  | 676 |     | 26  | n | 25  | 74  |
|    |       | activator inhibitor         |    |    |    |    |    |    |     |     | 76  |   | 42  | 04  |
|    |       | type 1), member 2           |    |    |    |    |    |    |     |     |     |   |     |     |
| 79 | ERM   | Endoplasmic                 | 10 | 10 | 10 | 8. | 9. | 9. | -1. | -0. | 1.6 | D | 0.0 | 0.6 |
| 95 | P1    | reticulum                   | .4 | .2 | .0 | 82 | 99 | 76 | 686 | 753 | 86  | o | 45  | 63  |
| 6  |       | metallopeptidase 1          | 60 | 93 | 92 | 83 | 54 | 07 | 353 | 906 | 35  | w | 38  | 32  |
|    |       |                             | 09 | 57 | 72 | 9  | 8  | 9  | 12  | 667 | 31  | n | 85  | 74  |
|    |       |                             |    |    |    |    |    |    |     |     | 2   |   | 86  | 04  |
| 56 | PCD   | Protocadherin $\alpha$ 13   | 7. | 7. | 6. | 6. | 6. | 6. | -1. | -0. | 1.5 | D | 0.0 | 0.6 |
| 13 | HA1   |                             | 44 | 73 | 91 | 53 | 83 | 80 | 557 | 639 | 57  | o | 31  | 63  |
| 6  | 3     |                             | 20 | 45 | 29 | 69 | 18 | 31 | 526 | 256 | 52  | w | 81  | 32  |
|    |       |                             | 9  | 2  | 9  |    | 2  | 1  | 454 | 667 | 64  | n | 64  | 74  |
|    |       |                             |    |    |    |    |    |    |     |     | 54  |   | 86  | 04  |
| 56 | PCD   | Protocadherin $\alpha$ 4    | 7. | 7. | 6. | 6. | 6. | 6. | -1. | -0. | 1.5 | D | 0.0 | 0.6 |
| 14 | HA4   |                             | 44 | 73 | 91 | 53 | 83 | 80 | 557 | 639 | 57  | o | 31  | 63  |
| 4  |       |                             | 20 | 45 | 29 | 69 | 18 | 31 | 526 | 256 | 52  | w | 81  | 32  |

|    |     |                   |    |    |    |    |    |    |     |     |     |   |     |     |
|----|-----|-------------------|----|----|----|----|----|----|-----|-----|-----|---|-----|-----|
|    |     |                   | 9  | 2  | 9  |    | 2  | 1  | 454 | 667 | 64  | n | 64  | 74  |
|    |     |                   |    |    |    |    |    |    |     |     | 54  |   | 86  | 04  |
| 55 | BTB | BTB (POZ)         | 6. | 5. | 5. | 4. | 5. | 5. | -2. | -1. | 2.0 | D | 0.0 | 0.6 |
| 72 | D7  | domain containing | 50 | 39 | 95 | 47 | 17 | 08 | 055 | 039 | 55  | o | 14  | 63  |
| 7  |     | 7                 | 74 | 02 | 98 | 98 | 45 | 41 | 757 | 67  | 75  | w | 66  | 32  |
|    |     |                   | 8  |    | 8  | 5  | 9  | 1  | 369 |     | 73  | n | 80  | 74  |
|    |     |                   |    |    |    |    |    |    |     |     | 69  |   | 11  | 04  |

Table SVI. DEGs in comparison VI.

| En try         | Gene symbol   | Gene name                                              | A 11<br>13<br>2     | A 11<br>13<br>5     | A 11<br>13<br>8      | A 11<br>13<br>9     | A 11<br>14<br>2     | A 11<br>14<br>3     | Fol d-c<br>han<br>ge     | log FC                   | abs olu<br>teF<br>C         | Re gu<br>lat<br>ion | P-v<br>alu<br>e             | FD<br>R                     |
|----------------|---------------|--------------------------------------------------------|---------------------|---------------------|----------------------|---------------------|---------------------|---------------------|--------------------------|--------------------------|-----------------------------|---------------------|-----------------------------|-----------------------------|
| 38<br>85<br>66 | ZNF470        | Zinc finger protein 470                                | 4.<br>73<br>01      | 5.<br>22<br>61<br>6 | 5.<br>55<br>58<br>2  | 3.<br>62<br>37<br>5 | 3.<br>93<br>89      | 4.<br>82<br>12      | -2.<br>060<br>141<br>359 | -1.<br>042<br>743<br>333 | 2.0<br>60<br>14<br>13<br>59 | D<br>o<br>w<br>n    | 0.0<br>24<br>71<br>93<br>24 | 0.3<br>83<br>13<br>18<br>63 |
| 50<br>50<br>6  | DUOX2         | Dual oxidase 2                                         | 11.<br>0<br>39<br>7 | 7.<br>17<br>74<br>1 | 9.<br>99<br>73<br>9  | 4.<br>21<br>46<br>1 | 8.<br>20<br>12<br>9 | 5.<br>34<br>11<br>8 | -11<br>.20<br>294<br>918 | -3.<br>485<br>806<br>667 | 11.<br>20<br>29<br>49<br>18 | D<br>o<br>w<br>n    | 0.0<br>29<br>08<br>09<br>23 | 0.3<br>94<br>49<br>63<br>82 |
| 69<br>47       | TCN1          | Transcobalamin I                                       | 8.<br>66<br>44<br>3 | 9.<br>48<br>78<br>2 | 10.<br>.1<br>54<br>6 | 3.<br>86<br>63<br>9 | 6.<br>30<br>29<br>9 | 7.<br>11<br>77<br>1 | -12<br>.75<br>731<br>958 | -3.<br>673<br>253<br>333 | 12.<br>75<br>73<br>19<br>58 | D<br>o<br>w<br>n    | 0.0<br>03<br>17<br>57<br>3  | 0.2<br>34<br>23<br>93<br>82 |
| 58<br>47<br>6  | TP53I<br>NP2  | Tumor protein p53 inducible nuclear protein 2          | 8.<br>57<br>57      | 7.<br>74<br>26<br>3 | 7.<br>85<br>12<br>7  | 6.<br>70<br>56<br>2 | 7.<br>67<br>35      | 6.<br>58<br>79<br>2 | -2.<br>095<br>827<br>531 | -1.<br>067<br>52         | 2.0<br>95<br>82<br>75<br>31 | D<br>o<br>w<br>n    | 0.0<br>25<br>64<br>58<br>11 | 0.3<br>84<br>82<br>70<br>3  |
| 55<br>08<br>4  | SOBP          | Sine oculis binding protein homolog                    | 5.<br>93<br>99<br>3 | 6.<br>19<br>87<br>1 | 6.<br>41<br>61<br>9  | 3.<br>52<br>77<br>9 | 4.<br>81<br>48<br>3 | 3.<br>79<br>60<br>2 | -4.<br>403<br>742<br>156 | -2.<br>138<br>73         | 4.4<br>03<br>74<br>21<br>56 | D<br>o<br>w<br>n    | 0.0<br>00<br>58<br>30<br>43 | 0.1<br>65<br>32<br>01<br>52 |
| 65<br>98<br>7  | KCTD14        | Potassium channel tetramerization domain containing 14 | 6.<br>56<br>54<br>9 | 8.<br>62<br>03<br>7 | 8.<br>64<br>64<br>5  | 3.<br>64<br>40<br>5 | 3.<br>83<br>58<br>3 | 5.<br>48<br>01<br>8 | -12<br>.32<br>984<br>991 | -3.<br>624<br>083<br>333 | 12.<br>32<br>98<br>49<br>91 | D<br>o<br>w<br>n    | 0.0<br>01<br>42<br>99<br>44 | 0.1<br>87<br>10<br>78<br>18 |
| 10<br>34<br>6  | TRIM2         | Tripartite motif containing 22                         | 9.<br>64<br>4       | 9.<br>08<br>84      | 9.<br>44<br>96<br>3  | 5.<br>39<br>48<br>5 | 8.<br>78<br>09      | 7.<br>49<br>45<br>6 | -4.<br>502<br>022<br>707 | -2.<br>170<br>573<br>333 | 4.5<br>02<br>02<br>27<br>07 | D<br>o<br>w<br>n    | 0.0<br>27<br>77<br>76<br>45 | 0.3<br>91<br>45<br>80<br>68 |
| 10<br>05       | HNRN<br>PUL2- | HNRNPUL2-BSC L2 readthrough                            | 7.<br>44            | 7.<br>92            | 7.<br>69             | 6.<br>65            | 6.<br>34            | 6.<br>86            | -2.<br>094               | -1.<br>066               | 2.0<br>94                   | D<br>o              | 0.0<br>03                   | 0.2<br>34                   |

|                |              |                                                                    |                     |                     |                      |                      |                      |                      |                          |                               |                             |                  |                             |                             |
|----------------|--------------|--------------------------------------------------------------------|---------------------|---------------------|----------------------|----------------------|----------------------|----------------------|--------------------------|-------------------------------|-----------------------------|------------------|-----------------------------|-----------------------------|
| 34<br>59<br>5  | BSCL2        | (NMD candidate)                                                    | 39<br>1             | 17<br>2             | 99<br>7              | 62<br>6              | 63<br>1              | 25                   | 844<br>756               | 843<br>333                    | 84<br>47<br>56              | w<br>n           | 16<br>71<br>19              | 23<br>93<br>82              |
| 20<br>34<br>27 | SLC25<br>A43 | Solute carrier<br>family 25, member<br>43                          | 4.<br>53<br>71<br>1 | 4.<br>96<br>85      | 4.<br>82<br>80<br>6  | 5.<br>51<br>25<br>2  | 6.<br>08<br>77<br>1  | 7.<br>01<br>52<br>9  | 2.6<br>893<br>981<br>12  | 1.4<br>272<br>833<br>33       | 2.6<br>89<br>39<br>81<br>12 | U<br>p           | 0.0<br>08<br>06<br>25<br>1  | 0.2<br>99<br>13<br>95<br>54 |
| 53<br>60       | PLTP         | Phospholipid<br>transfer protein                                   | 8.<br>95<br>80<br>9 | 8.<br>80<br>82<br>5 | 7.<br>57<br>00<br>9  | 5.<br>81<br>92<br>9  | 7.<br>77<br>55       | 6.<br>76<br>38<br>8  | -3.<br>158<br>530<br>127 | -1.<br>659<br>253<br>333      | 3.1<br>58<br>53<br>01<br>27 | D<br>o<br>w<br>n | 0.0<br>23<br>66<br>53<br>56 | 0.3<br>81<br>10<br>09<br>72 |
| 10<br>48       | CEAC<br>AM5  | Carcinoembryonic<br>antigen-related<br>cell adhesion<br>molecule 5 | 2.<br>90<br>91<br>5 | 4.<br>78<br>49<br>5 | 5.<br>38<br>01<br>8  | 10<br>.6<br>77<br>56 | 11<br>.4<br>89<br>78 | 12<br>.3<br>99<br>11 | 143<br>.41<br>545<br>24  | 7.1<br>640<br>566<br>67       | 14<br>3.4<br>15<br>45<br>24 | U<br>p           | 2.0<br>60<br>62<br>E-<br>05 | 0.0<br>89<br>45<br>15<br>48 |
| 33<br>71       | TNC          | Tenascin C                                                         | 5.<br>27<br>00<br>9 | 5.<br>15<br>77<br>3 | 5.<br>40<br>08<br>93 | 5.<br>87<br>19<br>4  | 8.<br>06<br>19<br>14 | 6.<br>37<br>14       | 2.8<br>180<br>033<br>63  | 1.4<br>946<br>733<br>33<br>63 | 2.8<br>18<br>00<br>33<br>63 | U<br>p           | 0.0<br>27<br>36<br>23<br>41 | 0.3<br>89<br>83<br>37<br>07 |
| 29<br>92<br>0  | PYCR<br>2    | Pyrroline-5-carbox<br>ylate reductase<br>family member 2           | 5.<br>16<br>62<br>9 | 5.<br>79<br>03      | 5.<br>54<br>06<br>3  | 7.<br>39<br>80<br>7  | 6.<br>81<br>91<br>6  | 5.<br>99<br>73       | 2.3<br>605<br>177<br>53  | 1.2<br>391<br>033<br>33       | 2.3<br>60<br>51<br>77<br>53 | U<br>p           | 0.0<br>14<br>72<br>39<br>13 | 0.3<br>47<br>51<br>10<br>24 |
| 13<br>05<br>74 | LYPD6        | LY6/PLAUR<br>domain containing<br>6                                | 8.<br>25<br>35<br>2 | 6.<br>85<br>38<br>8 | 7.<br>86<br>96<br>2  | 6.<br>90<br>19       | 6.<br>54<br>54<br>4  | 6.<br>34<br>05       | -2.<br>089<br>358<br>418 | -1.<br>063<br>06<br>84        | 2.0<br>89<br>35<br>84<br>18 | D<br>o<br>w<br>n | 0.0<br>29<br>17<br>83<br>77 | 0.3<br>94<br>49<br>63<br>82 |
| 51<br>11<br>0  | LACT<br>B2   | Lactamase $\beta$ 2                                                | 6.<br>10<br>00<br>3 | 5.<br>06<br>01      | 5.<br>34<br>22<br>5  | 6.<br>92<br>29<br>8  | 6.<br>82<br>72<br>5  | 6.<br>04<br>35<br>3  | 2.1<br>392<br>819<br>94  | 1.0<br>971<br>266<br>67       | 2.1<br>39<br>28<br>19<br>94 | U<br>p           | 0.0<br>20<br>09<br>07<br>93 | 0.3<br>70<br>24<br>86<br>67 |
| 28<br>32<br>19 | KCTD<br>21   | Potassium channel<br>tetramerization<br>domain containing<br>21    | 7.<br>29<br>81<br>2 | 6.<br>64<br>21<br>6 | 6.<br>59<br>63<br>1  | 5.<br>46<br>81<br>4  | 6.<br>10<br>45<br>8  | 5.<br>37<br>88<br>9  | -2.<br>289<br>437<br>742 | -1.<br>194<br>993<br>333      | 2.2<br>89<br>43<br>77<br>42 | D<br>o<br>w<br>n | 0.0<br>05<br>91<br>47<br>33 | 0.2<br>79<br>42<br>28<br>73 |
| 10             | GTF2I        | General                                                            | 7.                  | 8.                  | 8.                   | 7.                   | 6.                   | 7.                   | -2.                      | -1.                           | 2.1                         | D                | 0.0                         | 0.2                         |

|         |          |                                                                    |          |          |          |         |          |          |              |              |             |                  |             |             |
|---------|----------|--------------------------------------------------------------------|----------|----------|----------|---------|----------|----------|--------------|--------------|-------------|------------------|-------------|-------------|
| 0093631 | P4       | transcription factor iii, pseudogene 4                             | 83213    | 52857    | 56697    | 3868    | 9157     | 25453    | 178819474    | 123546667    | 78819474    | o<br>w<br>n      | 05285487    | 6846247     |
| 1373    | CPS1     | Carbamoyl-phosphate synthase 1                                     | 4.33046  | 4.58116  | 4.55213  | 4.66769 | 10.46137 | 9.80141  | 14.14519343  | 3.82224      | 14.14519343 | U<br>p           | 0.02998467  | 0.397944578 |
| 55799   | CACNA2D3 | Calcium channel, voltage-dependent, $\alpha$ 2/ $\Delta$ subunit 3 | 7.08439  | 5.68674  | 4.17955  | 3.04571 | 3.24361  | 4.39213  | -4.256723358 | -2.089743333 | 4.256723358 | D<br>o<br>w<br>n | 0.02453909  | 0.383089258 |
| 275     | AMT      | Aminomethyltransferase                                             | 6.09108  | 6.67132  | 6.63612  | 5.98253 | 4.4771   | 5.67572  | -2.146059387 | -1.10169     | 2.146059387 | D<br>o<br>w<br>n | 0.034629935 | 0.408423981 |
| 9235    | IL32     | Interleukin 32                                                     | 8.05169  | 5.92376  | 6.08448  | 8.54678 | 8.60601  | 7.89194  | 3.163671927  | 1.661671927  | 3.163671927 | U<br>p           | 0.024190892 | 0.38258708  |
| 59084   | ENPP5    | Ectonucleotide pyrophosphatase/phosphodiesterase 5 (putative)      | 7.17305  | 6.67075  | 6.2358   | 5.16498 | 5.16886  | 6.32537  | -2.20400824  | -1.14013     | 2.20400824  | D<br>o<br>w<br>n | 0.025445383 | 0.384426011 |
| 6286    | S100P    | S100 calcium binding protein P                                     | 5.84806  | 6.12302  | 6.91097  | 9.84056 | 7.98171  | 9.02831  | 6.3036055    | 2.656176667  | 6.3036055   | U<br>p           | 0.001281333 | 0.187107818 |
| 216     | ALDH1A1  | Aldehyde dehydrogenase 1 family member A1                          | 10.2939  | 9.04638  | 8.71905  | 5.4857  | 7.74199  | 8.09062  | -4.67674035  | -2.22550333  | 4.67674035  | D<br>o<br>w<br>n | 0.019440091 | 0.367664157 |
| 5284    | PIGR     | Polymeric immunoglobulin receptor                                  | 10.44617 | 11.85376 | 12.16181 | 5.66903 | 9.83153  | 10.25119 | -7.48140892  | -2.90331     | 7.48140892  | D<br>o<br>w<br>n | 0.045856621 | 0.439135361 |



|                |             |                                                                          |                     |                     |                     |                     |                     |                     |                          |                          |                             |                  |                             |                             |
|----------------|-------------|--------------------------------------------------------------------------|---------------------|---------------------|---------------------|---------------------|---------------------|---------------------|--------------------------|--------------------------|-----------------------------|------------------|-----------------------------|-----------------------------|
| 30<br>84<br>5  | EHD3        | EH domain<br>containing 3                                                | 5.<br>15<br>09<br>8 | 6.<br>73<br>64<br>3 | 6.<br>54<br>02      | 4.<br>90<br>72<br>5 | 5.<br>15<br>78<br>8 | 5.<br>08<br>25<br>3 | -2.<br>133<br>639<br>837 | -1.<br>093<br>316<br>667 | 2.1<br>33<br>63<br>98<br>37 | D<br>o<br>w<br>n | 0.0<br>36<br>32<br>71<br>18 | 0.4<br>13<br>67<br>97<br>96 |
| 39<br>98       | LMAN<br>1   | Lectin,<br>mannose-binding,<br>1                                         | 5.<br>03<br>72<br>8 | 6.<br>24<br>19<br>6 | 5.<br>97<br>04<br>1 | 4.<br>84<br>17<br>2 | 5.<br>03<br>01<br>6 | 4.<br>11<br>47      | -2.<br>125<br>334<br>617 | -1.<br>087<br>69         | 2.1<br>25<br>33<br>46<br>17 | D<br>o<br>w<br>n | 0.0<br>26<br>91<br>49<br>29 | 0.3<br>88<br>45<br>19<br>23 |
| 87<br>75       | NAPA        | N-ethylmaleimide-<br>sensitive factor<br>attachment<br>protein, $\alpha$ | 9.<br>09<br>87      | 9.<br>64<br>88      | 9.<br>53<br>02<br>6 | 9.<br>03<br>33<br>8 | 8.<br>24<br>31<br>4 | 7.<br>02<br>22      | -2.<br>507<br>656<br>951 | -1.<br>326<br>34         | 2.5<br>07<br>65<br>69<br>51 | D<br>o<br>w<br>n | 0.0<br>32<br>64<br>73<br>43 | 0.4<br>04<br>71<br>37<br>9  |
| 27<br>28<br>4  | SULT1<br>B1 | Sulfotransferase<br>family 1B member<br>1                                | 3.<br>26<br>11<br>6 | 4.<br>83<br>99<br>7 | 4.<br>26<br>10<br>2 | 9.<br>31<br>73<br>2 | 5.<br>35<br>88<br>7 | 5.<br>44<br>91<br>4 | 6.0<br>115<br>068<br>63  | 2.5<br>877<br>266<br>67  | 6.0<br>11<br>50<br>68<br>63 | U<br>p           | 0.0<br>45<br>87<br>97<br>52 | 0.4<br>39<br>13<br>53<br>61 |
| 70<br>25       | NR2F1       | Nuclear receptor<br>subfamily 2 group<br>F member 1                      | 9.<br>32<br>64      | 9.<br>53<br>67<br>1 | 9.<br>60<br>35<br>7 | 6.<br>75<br>42      | 7.<br>52<br>65      | 7.<br>00<br>39<br>1 | -5.<br>256<br>211<br>519 | -2.<br>394<br>023<br>333 | 5.2<br>56<br>21<br>15<br>19 | D<br>o<br>w<br>n | 4.0<br>82<br>3E<br>-05      | 0.0<br>96<br>05<br>29<br>42 |
| 55<br>22<br>5  | RAVE<br>R2  | Ribonucleoprotein<br>, PTB-binding 2                                     | 6.<br>92<br>10<br>5 | 7.<br>76<br>59<br>6 | 8.<br>62<br>21<br>9 | 5.<br>96<br>25<br>2 | 7.<br>13<br>79<br>3 | 6.<br>09<br>5       | -2.<br>586<br>946<br>109 | -1.<br>371<br>25         | 2.5<br>86<br>94<br>61<br>09 | D<br>o<br>w<br>n | 0.0<br>29<br>83<br>43<br>56 | 0.3<br>97<br>50<br>17<br>86 |
| 28<br>44<br>06 | ZFP82       | ZFP82 zinc finger<br>protein                                             | 6.<br>87<br>23<br>7 | 6.<br>52<br>17      | 6.<br>51<br>10<br>1 | 4.<br>30<br>38<br>2 | 6.<br>12<br>59<br>1 | 5.<br>38<br>83<br>5 | -2.<br>571<br>006<br>635 | -1.<br>362<br>333<br>333 | 2.5<br>71<br>00<br>66<br>35 | D<br>o<br>w<br>n | 0.0<br>19<br>42<br>01<br>26 | 0.3<br>67<br>66<br>41<br>57 |
| 57<br>13<br>9  | RGL3        | Ral guanine<br>nucleotide<br>dissociation<br>stimulator-like 3           | 6.<br>78<br>34<br>6 | 7.<br>71<br>2       | 7.<br>41<br>74<br>7 | 6.<br>26<br>83<br>4 | 5.<br>06<br>84<br>9 | 6.<br>44<br>09<br>1 | -2.<br>599<br>792<br>835 | -1.<br>378<br>396<br>667 | 2.5<br>99<br>79<br>28<br>35 | D<br>o<br>w<br>n | 0.0<br>15<br>13<br>13<br>3  | 0.3<br>48<br>67<br>95<br>47 |
| 58<br>49<br>9  | ZNF46<br>2  | Zinc finger protein<br>462                                               | 5.<br>16<br>37<br>2 | 5.<br>54<br>03<br>9 | 5.<br>86<br>51<br>9 | 3.<br>62<br>84<br>4 | 4.<br>04<br>67<br>5 | 4.<br>73<br>89<br>4 | -2.<br>611<br>767<br>849 | -1.<br>385<br>026<br>667 | 2.6<br>11<br>76<br>78       | D<br>o<br>w<br>n | 0.0<br>04<br>38<br>39       | 0.2<br>50<br>46<br>95       |

|                |              |                                                                            |                      |                      |                      |                     |                     |                     |                          |                          |                             |                  |                             |                             |  |
|----------------|--------------|----------------------------------------------------------------------------|----------------------|----------------------|----------------------|---------------------|---------------------|---------------------|--------------------------|--------------------------|-----------------------------|------------------|-----------------------------|-----------------------------|--|
|                |              |                                                                            |                      |                      |                      |                     |                     |                     |                          |                          |                             | 49               |                             | 3                           |  |
| 55<br>57<br>8  | SUPT2<br>0H  | SPT20 homolog,<br>SAGA complex<br>component                                | 5.<br>44<br>54<br>6  | 5.<br>38<br>84       | 5.<br>31<br>40<br>1  | 5.<br>46<br>76<br>8 | 6.<br>87<br>70<br>7 | 7.<br>94<br>06<br>2 | 2.6<br>011<br>807<br>76  | 1.3<br>791<br>666<br>67  | 2.6<br>01<br>18<br>07<br>76 | U<br>p           | 0.0<br>47<br>74<br>37<br>69 | 0.4<br>43<br>31<br>90<br>56 |  |
| 35<br>7        | SHRO<br>OM2  | Shroom family<br>member 2                                                  | 4.<br>76<br>62<br>2  | 5.<br>33<br>37<br>9  | 5.<br>61<br>25<br>8  | 2.<br>50<br>38<br>7 | 2.<br>98<br>54<br>7 | 4.<br>91<br>59<br>6 | -3.<br>408<br>404<br>75  | -1.<br>769<br>096<br>667 | 3.4<br>08<br>40<br>47<br>5  | D<br>o<br>w<br>n | 0.0<br>23<br>36<br>69<br>25 | 0.3<br>80<br>85<br>39<br>85 |  |
| 59<br>50       | RBP4         | Retinol binding<br>protein 4                                               | 3.<br>71<br>94<br>3  | 4.<br>34<br>72<br>5  | 4.<br>10<br>46<br>1  | 4.<br>59<br>21<br>8 | 6.<br>35<br>17<br>5 | 5.<br>10<br>28<br>2 | 2.4<br>483<br>672<br>92  | 1.2<br>918<br>2          | 2.4<br>48<br>36<br>72<br>92 | U<br>p           | 0.0<br>24<br>39<br>22<br>78 | 0.3<br>82<br>66<br>40<br>12 |  |
| 63<br>93<br>5  | PCIF1        | PDX1 C-terminal<br>inhibiting factor 1                                     | 4.<br>68<br>84<br>7  | 3.<br>35<br>19<br>8  | 4.<br>31<br>60<br>8  | 5.<br>77<br>34<br>5 | 6.<br>42<br>83<br>1 | 5.<br>29<br>56<br>5 | 3.2<br>798<br>427<br>94  | 1.7<br>136<br>266<br>67  | 3.2<br>79<br>84<br>27<br>94 | U<br>p           | 0.0<br>05<br>16<br>88<br>14 | 0.2<br>66<br>23<br>90<br>84 |  |
| 84<br>45       | DYRK<br>2    | Dual specificity<br>tyrosine-(Y)-phos<br>phorylation<br>regulated kinase 2 | 4.<br>67<br>69<br>6  | 3.<br>82<br>94<br>6  | 3.<br>90<br>39<br>9  | 7.<br>94<br>56<br>6 | 5.<br>72<br>53<br>2 | 4.<br>70<br>54<br>2 | 3.9<br>686<br>912<br>59  | 1.9<br>886<br>633<br>33  | 3.9<br>68<br>69<br>12<br>59 | U<br>p           | 0.0<br>37<br>39<br>65<br>07 | 0.4<br>16<br>53<br>88<br>03 |  |
| 86<br>35       | RNAS<br>ET2  | Ribonuclease T2                                                            | 9.<br>55<br>24<br>5  | 10<br>.4<br>29<br>61 | 10<br>.6<br>48<br>92 | 7.<br>26<br>96      | 9.<br>09<br>71<br>2 | 9.<br>58<br>82<br>3 | -2.<br>945<br>835<br>084 | -1.<br>558<br>676<br>667 | 2.9<br>45<br>83<br>50<br>84 | D<br>o<br>w<br>n | 0.0<br>40<br>83<br>82<br>72 | 0.4<br>26<br>34<br>37<br>07 |  |
| 71<br>0        | SERPI<br>NG1 | Serpin peptidase<br>inhibitor, clade G<br>(C1 inhibitor),<br>member 1      | 10<br>.4<br>73<br>36 | 8.<br>52<br>86<br>5  | 9.<br>29<br>72<br>3  | 6.<br>31<br>65      | 8.<br>73<br>95<br>7 | 7.<br>27<br>50<br>1 | -3.<br>970<br>681<br>566 | -1.<br>989<br>386<br>667 | 3.9<br>70<br>68<br>15<br>66 | D<br>o<br>w<br>n | 0.0<br>26<br>88<br>04<br>07 | 0.3<br>88<br>38<br>41<br>04 |  |
| 10<br>33       | CDKN<br>3    | Cyclin-dependent<br>kinase inhibitor 3                                     | 5.<br>21<br>87<br>6  | 4.<br>09<br>23<br>1  | 4.<br>80<br>74<br>9  | 6.<br>67<br>18<br>7 | 7.<br>96<br>28<br>4 | 6.<br>52<br>92<br>5 | 5.0<br>928<br>268<br>45  | 2.3<br>484<br>666<br>67  | 5.0<br>92<br>82<br>68<br>45 | U<br>p           | 0.0<br>01<br>50<br>04<br>14 | 0.1<br>87<br>10<br>78<br>18 |  |
| 21<br>98<br>54 | TMEM<br>218  | Transmembrane<br>protein 218                                               | 5.<br>54<br>52       | 5.<br>22<br>41       | 5.<br>40<br>12       | 3.<br>89<br>59      | 4.<br>19<br>62      | 4.<br>73<br>96      | -2.<br>162<br>869        | -1.<br>112<br>946        | 2.1<br>62<br>86             | D<br>o<br>w      | 0.0<br>03<br>69             | 0.2<br>38<br>59             |  |

|    |              |                                                                        |         |         |         |         |         |         |              |              |             |   |             |             |
|----|--------------|------------------------------------------------------------------------|---------|---------|---------|---------|---------|---------|--------------|--------------|-------------|---|-------------|-------------|
|    |              |                                                                        | 6       | 2       | 8       | 5       | 5       | 2       | 569          | 667          | 95          | n | 28          | 85          |
| 33 | ID2          | Inhibitor of DNA binding 2, dominant negative helix-loop-helix protein | 8.23711 | 8.84918 | 8.86974 | 7.35655 | 7.06276 | 7.0772  | -2.80209655  | -1.486506667 | 2.80209655  | D | 0.00658715  | 0.172631847 |
| 79 | THSD4        | Thrombospondin type 1 domain containing 4                              | 8.52752 | 7.18644 | 7.33974 | 4.53711 | 6.78696 | 6.76309 | -3.150352651 | -1.655513333 | 3.150352651 | D | 0.04485911  | 0.435527714 |
| 26 | BSCL2        | Berardinelli-Seip congenital lipodystrophy 2 (seipin)                  | 7.44391 | 7.92172 | 7.69997 | 6.65626 | 6.34631 | 6.8625  | -2.094844756 | -1.066843333 | 2.094844756 | D | 0.03167119  | 0.2349382   |
| 55 | ZNF415       | Zinc finger protein 415                                                | 5.25114 | 5.45495 | 5.28652 | 3.20697 | 4.18467 | 4.39236 | -2.644270927 | -1.40287     | 2.644270927 | D | 0.03533123  | 0.23766     |
| 10 | LOC102723872 | Putative protein FAM157B                                               | 8.27782 | 8.11345 | 7.66239 | 5.84476 | 5.87111 | 6.62628 | -3.742070312 | -1.903836667 | 3.742070312 | D | 0.0426253   | 0.163378734 |
| 34 | IGF1R        | Insulin like growth factor 1 receptor                                  | 5.65891 | 6.49335 | 6.25641 | 5.4463  | 5.01632 | 4.80537 | -2.066076013 | -1.046893333 | 2.066076013 | D | 0.066680498 | 0.313660293 |
| 23 | FRMD4B       | FERM domain containing 4B                                              | 8.1092  | 7.78426 | 8.08516 | 7.75006 | 5.81557 | 7.01529 | -2.192484535 | -1.132566667 | 2.192484535 | D | 0.048384549 | 0.44483505  |
| 80 | ULBP2        | UL16 binding protein 2                                                 | 5.41502 | 5.18697 | 4.64681 | 6.32896 | 5.96492 | 7.31171 | 2.7363728    | 1.4522633    | 2.7363728   | U | 0.07987247  | 0.29913954  |
| 48 | NOTCH2       | Notch 2                                                                | 7.77    | 7.35    | 7.50    | 9.02    | 8.39    | 8.23    | 2.0108       | 1.0078       | 2.0108      | U | 0.08        | 0.304       |

|    |       |                     |    |    |    |    |    |    |     |     |     |   |     |     |
|----|-------|---------------------|----|----|----|----|----|----|-----|-----|-----|---|-----|-----|
|    |       |                     | 63 | 32 | 59 | 15 | 94 | 79 | 702 | 2   | 87  |   | 35  | 72  |
|    |       |                     |    |    | 9  | 2  | 5  | 8  | 56  |     | 02  |   | 33  | 02  |
|    |       |                     |    |    |    |    |    |    |     |     | 56  |   | 07  | 15  |
| 65 | FAM1  | Family with         | 6. | 6. | 6. | 3. | 3. | 5. | -4. | -2. | 4.6 | D | 0.0 | 0.2 |
| 33 | 53C   | sequence            | 87 | 80 | 70 | 93 | 95 | 88 | 613 | 205 | 13  | o | 04  | 44  |
| 16 |       | similarity 153,     | 68 | 65 | 38 | 42 | 25 | 33 | 089 | 733 | 08  | w | 08  | 25  |
|    |       | member C            | 9  | 5  | 9  | 4  | 1  | 8  | 661 | 333 | 96  | n | 31  | 17  |
|    |       |                     |    |    |    |    |    |    |     |     | 61  |   | 77  | 2   |
| 22 | ALDO  | Aldolase,           | 7. | 5. | 7. | 7. | 9. | 9. | 4.3 | 2.1 | 4.3 | U | 0.0 | 0.4 |
| 9  | B     | fructose-bisphosph  | 33 | 39 | 47 | 37 | 89 | 30 | 619 | 249 | 61  | p | 31  | 01  |
|    |       | ate B               | 28 | 73 | 34 | 83 | 33 | 69 | 906 | 866 | 99  |   | 62  | 56  |
|    |       |                     | 7  | 5  | 1  |    | 5  | 4  | 17  | 67  | 06  |   | 53  | 52  |
|    |       |                     |    |    |    |    |    |    |     |     | 17  |   | 32  | 84  |
| 68 | SULT1 | Sulfotransferase    | 3. | 3. | 6. | 10 | 7. | 7. | 15. | 3.9 | 15. | U | 0.0 | 0.2 |
| 19 | C2    | family 1C member    | 46 | 71 | 03 | .0 | 41 | 63 | 554 | 592 | 55  | p | 03  | 37  |
|    |       | 2                   | 17 | 58 | 72 | 44 | 15 | 64 | 642 | 733 | 46  |   | 46  | 14  |
|    |       |                     | 5  |    |    | 52 | 6  | 9  | 51  | 33  | 42  |   | 24  | 66  |
|    |       |                     |    |    |    |    |    |    |     |     | 51  |   | 02  | 6   |
| 29 | CNIH4 | Cornichon family    | 7. | 6. | 6. | 8. | 8. | 7. | 2.1 | 1.1 | 2.1 | U | 0.0 | 0.2 |
| 09 |       | AMPA receptor       | 20 | 72 | 78 | 29 | 23 | 50 | 559 | 083 | 55  | p | 06  | 88  |
| 7  |       | auxiliary protein 4 | 2  | 15 | 16 | 39 | 29 | 31 | 593 | 3   | 95  |   | 80  | 45  |
|    |       |                     |    | 1  | 1  | 9  | 7  | 5  | 85  |     | 93  |   | 95  | 97  |
|    |       |                     |    |    |    |    |    |    |     |     | 85  |   | 99  | 19  |
| 10 | CENP  | Centromere          | 5. | 5. | 5. | 8. | 7. | 6. | 4.1 | 2.0 | 4.1 | U | 0.0 | 0.2 |
| 63 | F     | protein F           | 79 | 04 | 47 | 14 | 69 | 58 | 076 | 383 | 07  | p | 02  | 07  |
|    |       |                     | 04 | 34 | 20 | 08 | 42 | 58 | 312 | 066 | 63  |   | 14  | 75  |
|    |       |                     | 5  | 8  | 8  | 1  | 8  | 4  | 29  | 67  | 12  |   | 00  | 59  |
|    |       |                     |    |    |    |    |    |    |     |     | 29  |   | 71  | 05  |
| 90 | PRC1  | Protein regulator   | 5. | 5. | 4. | 6. | 6. | 6. | 2.5 | 1.3 | 2.5 | U | 0.0 | 0.2 |
| 55 |       | of cytokinesis 1    | 48 | 05 | 65 | 54 | 71 | 04 | 816 | 683 | 81  | p | 02  | 21  |
|    |       |                     | 77 | 14 | 57 | 32 | 23 | 42 | 856 | 133 | 68  |   | 56  | 48  |
|    |       |                     | 8  | 8  | 1  | 7  | 7  | 7  | 26  | 33  | 56  |   | 23  | 56  |
|    |       |                     |    |    |    |    |    |    |     |     | 26  |   | 4   | 65  |
| 10 | CDX2  | Caudal type         | 5. | 5. | 5. | 5. | 6. | 6. | 2.0 | 1.0 | 2.0 | U | 0.0 | 0.3 |
| 45 |       | homeobox 2          | 36 | 31 | 34 | 97 | 99 | 11 | 320 | 229 | 32  | p | 11  | 29  |
|    |       |                     | 33 | 46 | 09 | 64 | 50 | 62 | 557 | 4   | 05  |   | 83  | 73  |
|    |       |                     | 7  | 9  | 3  | 9  | 9  | 3  | 73  |     | 57  |   | 27  | 79  |
|    |       |                     |    |    |    |    |    |    |     |     | 73  |   | 22  | 49  |
| 24 | KIF4A | Kinesin family      | 4. | 4. | 4. | 5. | 6. | 5. | 2.0 | 1.0 | 2.0 | U | 0.0 | 0.3 |
| 13 |       | member 4A           | 58 | 68 | 79 | 61 | 31 | 20 | 332 | 238 | 33  | p | 11  | 30  |
| 7  |       |                     | 75 | 40 | 65 | 71 | 34 | 89 | 674 |     | 26  |   | 87  | 28  |
|    |       |                     | 6  | 5  | 5  | 8  | 3  | 5  | 56  |     | 74  |   | 55  | 63  |
|    |       |                     |    |    |    |    |    |    |     |     | 56  |   | 09  | 88  |
| 88 | VNN1  | Vanin 1             | 6. | 3. | 3. | 9. | 7. | 6. | 11. | 3.5 | 11. | U | 0.0 | 0.3 |

|               |              |                                                                                |                      |                     |                     |                      |                      |                     |                          |                          |                             |                  |                             |                             |
|---------------|--------------|--------------------------------------------------------------------------------|----------------------|---------------------|---------------------|----------------------|----------------------|---------------------|--------------------------|--------------------------|-----------------------------|------------------|-----------------------------|-----------------------------|
| 76            |              |                                                                                | 43<br>18<br>9        | 27<br>64<br>8       | 02<br>71<br>2       | 34<br>89             | 40<br>48<br>8        | 66<br>57<br>2       | 805<br>086<br>16         | 613<br>366<br>67         | 80<br>50<br>86<br>16        | p                | 11<br>57<br>26<br>47        | 27<br>65<br>98<br>66        |
| 46<br>81      | NBL1         | Neuroblastoma 1,<br>DAN family BMP<br>antagonist                               | 8.<br>82<br>00<br>7  | 7.<br>40<br>03      | 8.<br>58<br>86<br>1 | 9.<br>66<br>77<br>5  | 10<br>.3<br>22<br>91 | 9.<br>08<br>30<br>1 | 2.6<br>787<br>562<br>92  | 1.4<br>215<br>633<br>33  | 2.6<br>78<br>75<br>62<br>92 | U<br>p           | 0.0<br>19<br>34<br>57<br>08 | 0.3<br>67<br>66<br>41<br>57 |
| 53<br>18      | PKP2         | Plakophilin 2                                                                  | 8.<br>56<br>47<br>5  | 8.<br>91<br>63      | 8.<br>41<br>44      | 10<br>.6<br>97<br>59 | 11<br>.2<br>79<br>34 | 9.<br>89<br>59<br>5 | 3.9<br>791<br>951<br>84  | 1.9<br>924<br>766<br>67  | 3.9<br>79<br>19<br>51<br>84 | U<br>p           | 0.0<br>01<br>12<br>34<br>33 | 0.1<br>86<br>14<br>79<br>2  |
| 80<br>01<br>2 | PHC3         | Polyhomeotic<br>homolog 3<br>(Drosophila)                                      | 3.<br>63<br>61<br>9  | 4.<br>75<br>89<br>6 | 3.<br>72<br>13<br>4 | 4.<br>47<br>53<br>5  | 4.<br>99<br>32<br>9  | 5.<br>98<br>51<br>5 | 2.1<br>621<br>001<br>23  | 1.1<br>124<br>333<br>33  | 2.1<br>62<br>10<br>01<br>23 | U<br>p           | 0.0<br>47<br>45<br>42<br>3  | 0.4<br>42<br>16<br>29<br>65 |
| 23<br>47<br>4 | ETHE1        | Ethylmalonic<br>encephalopathy 1                                               | 6.<br>89<br>61<br>3  | 6.<br>67<br>75<br>2 | 7.<br>68<br>36<br>2 | 8.<br>66<br>99<br>2  | 8.<br>20<br>09<br>4  | 8.<br>27<br>78<br>2 | 2.4<br>574<br>067<br>4   | 1.2<br>971<br>366<br>67  | 2.4<br>57<br>40<br>67<br>4  | U<br>p           | 0.0<br>04<br>73<br>18<br>19 | 0.2<br>58<br>19<br>47<br>48 |
| 10<br>66      | CES1         | Carboxylesterase 1                                                             | 12<br>.5<br>86<br>02 | 7.<br>96<br>52<br>6 | 9.<br>64<br>43      | 5.<br>60<br>04<br>1  | 7.<br>40<br>13<br>3  | 5.<br>87<br>52<br>7 | -13<br>.66<br>919<br>774 | -3.<br>772<br>856<br>667 | 13.<br>66<br>91<br>97<br>74 | D<br>o<br>w<br>n | 0.0<br>12<br>42<br>41<br>69 | 0.3<br>34<br>46<br>67<br>31 |
| 71<br>53      | TOP2<br>A    | Topoisomerase<br>(DNA) II $\alpha$                                             | 6.<br>82<br>27<br>3  | 5.<br>26<br>12<br>6 | 6.<br>18<br>07<br>6 | 8.<br>53<br>57       | 8.<br>69<br>82<br>2  | 7.<br>69<br>67<br>8 | 4.6<br>653<br>435<br>83  | 2.2<br>219<br>833<br>33  | 4.6<br>65<br>34<br>35<br>83 | U<br>p           | 0.0<br>01<br>87<br>20<br>44 | 0.1<br>95<br>55<br>85<br>68 |
| 81<br>03<br>4 | SLC25<br>A32 | Solute carrier<br>family 25<br>(mitochondrial<br>folate carrier),<br>member 32 | 4.<br>31<br>96<br>5  | 4.<br>25<br>86<br>8 | 4.<br>13<br>42<br>8 | 5.<br>46<br>85       | 5.<br>62<br>77<br>4  | 4.<br>91<br>56<br>1 | 2.1<br>431<br>705<br>57  | 1.0<br>997<br>466<br>67  | 2.1<br>43<br>17<br>05<br>57 | U<br>p           | 0.0<br>02<br>34<br>43<br>02 | 0.2<br>13<br>49<br>53<br>85 |
| 95<br>7       | ENTP<br>D5   | Ectonucleoside<br>triphosphate<br>diphosphohydrolas<br>e 5                     | 9.<br>75<br>16<br>1  | 8.<br>67<br>54<br>8 | 9.<br>70<br>32<br>6 | 9.<br>02<br>59       | 7.<br>98<br>70<br>3  | 7.<br>56<br>65<br>3 | -2.<br>271<br>475<br>902 | -1.<br>183<br>63         | 2.2<br>71<br>47<br>59<br>02 | D<br>o<br>w<br>n | 0.0<br>37<br>99<br>71<br>13 | 0.4<br>17<br>70<br>09<br>62 |

|               |             |                                                                      |                     |                     |                     |                     |                     |                     |                          |                          |                             |                  |                             |                             |
|---------------|-------------|----------------------------------------------------------------------|---------------------|---------------------|---------------------|---------------------|---------------------|---------------------|--------------------------|--------------------------|-----------------------------|------------------|-----------------------------|-----------------------------|
| 28<br>98<br>2 | FLVC<br>R1  | Feline leukemia virus subgroup C cellular receptor 1                 | 5.<br>79<br>04<br>7 | 5.<br>37<br>60<br>9 | 5.<br>53<br>81<br>2 | 7.<br>27<br>83<br>4 | 6.<br>81<br>10<br>6 | 6.<br>07<br>89      | 2.2<br>261<br>333<br>26  | 1.1<br>545<br>4          | 2.2<br>26<br>13<br>33<br>26 | U<br>p           | 0.0<br>10<br>85<br>49<br>19 | 0.3<br>23<br>87<br>84<br>16 |
| 71<br>64      | TPD52<br>L1 | Tumor protein D52-like 1                                             | 7.<br>52<br>88<br>9 | 6.<br>76<br>75<br>4 | 7.<br>01<br>68<br>5 | 5.<br>13<br>74<br>2 | 3.<br>67<br>85<br>5 | 4.<br>53<br>24      | -6.<br>298<br>332<br>841 | -2.<br>654<br>97         | 6.2<br>98<br>33<br>28<br>41 | D<br>o<br>w<br>n | 0.0<br>00<br>33<br>41<br>15 | 0.1<br>60<br>90<br>15<br>41 |
| 55<br>82<br>5 | PECR        | Peroxisomal trans-2-enoyl-coa reductase                              | 6.<br>08<br>04<br>9 | 5.<br>59<br>74<br>8 | 6.<br>18<br>71<br>3 | 5.<br>62<br>76<br>3 | 4.<br>66<br>69<br>1 | 4.<br>38<br>57      | -2.<br>087<br>274<br>003 | -1.<br>061<br>62         | 2.0<br>87<br>27<br>40<br>03 | D<br>o<br>w<br>n | 0.0<br>22<br>26<br>05<br>19 | 0.3<br>78<br>45<br>78<br>86 |
| 64<br>27      | SRSF2       | Serine/arginine-rich splicing factor 2                               | 7.<br>63<br>76<br>2 | 7.<br>72<br>75<br>7 | 7.<br>63<br>85<br>3 | 8.<br>36<br>55<br>3 | 8.<br>71<br>82<br>2 | 9.<br>17<br>88<br>7 | 2.1<br>232<br>878<br>97  | 1.0<br>863               | 2.1<br>23<br>28<br>78<br>97 | U<br>p           | 0.0<br>04<br>16<br>31<br>34 | 0.2<br>45<br>18<br>04<br>58 |
| 17<br>19      | DHFR        | Dihydrofolate reductase                                              | 5.<br>88<br>26      | 5.<br>25<br>53<br>9 | 5.<br>39<br>77      | 7.<br>84<br>15<br>5 | 7.<br>49<br>69      | 6.<br>98<br>36<br>1 | 3.8<br>073<br>573<br>91  | 1.9<br>287<br>9          | 3.8<br>07<br>35<br>73<br>91 | U<br>p           | 0.0<br>00<br>37<br>82<br>4  | 0.1<br>60<br>90<br>15<br>41 |
| 13<br>97      | CRIP2       | Cysteine-rich protein 2                                              | 6.<br>46<br>20<br>9 | 8.<br>01<br>19<br>1 | 8.<br>24<br>60<br>7 | 5.<br>57<br>06<br>5 | 6.<br>36<br>50<br>8 | 6.<br>66<br>83      | -2.<br>588<br>315<br>23  | -1.<br>372<br>013<br>333 | 2.5<br>88<br>31<br>52<br>3  | D<br>o<br>w<br>n | 0.0<br>35<br>33<br>27<br>86 | 0.4<br>09<br>98<br>41<br>4  |
| 21<br>52      | F3          | Coagulation factor III (thromboplastin, tissue factor)               | 5.<br>96<br>80<br>2 | 6.<br>45<br>65<br>6 | 5.<br>86<br>93<br>7 | 7.<br>23<br>34<br>3 | 8.<br>42<br>96      | 8.<br>45<br>29<br>4 | 3.8<br>388<br>477<br>23  | 1.9<br>406<br>733<br>33  | 3.8<br>38<br>84<br>77<br>23 | U<br>p           | 0.0<br>01<br>50<br>15<br>36 | 0.1<br>87<br>10<br>78<br>18 |
| 86<br>71      | SLC4A<br>4  | Solute carrier family 4 (sodium bicarbonate cotransporter), member 4 | 9.<br>09<br>86<br>8 | 7.<br>83<br>98<br>4 | 9.<br>27<br>77<br>4 | 8.<br>00<br>03<br>8 | 6.<br>47<br>25      | 5.<br>99<br>49<br>7 | -3.<br>774<br>110<br>509 | -1.<br>916<br>136<br>667 | 3.7<br>74<br>11<br>05<br>09 | D<br>o<br>w<br>n | 0.0<br>15<br>76<br>42<br>38 | 0.3<br>50<br>93<br>61<br>89 |
| 28<br>96<br>9 | BZW2        | Basic leucine zipper and W2 domains 2                                | 5.<br>06<br>74      | 4.<br>70<br>22<br>3 | 4.<br>89<br>37<br>5 | 6.<br>24<br>50<br>4 | 6.<br>72<br>15<br>1 | 5.<br>52<br>40<br>5 | 2.4<br>212<br>297<br>79  | 1.2<br>757<br>4          | 2.4<br>21<br>22<br>97       | U<br>p           | 0.0<br>06<br>08<br>67       | 0.2<br>79<br>48<br>17       |

|                |              |                                                                  |                      |                     |                     |                     |                     |                     |                          |                          |                             |                  |                             |                             |    |
|----------------|--------------|------------------------------------------------------------------|----------------------|---------------------|---------------------|---------------------|---------------------|---------------------|--------------------------|--------------------------|-----------------------------|------------------|-----------------------------|-----------------------------|----|
|                |              |                                                                  |                      |                     |                     |                     |                     |                     |                          |                          |                             | 79               |                             | 16                          | 42 |
| 65<br>38<br>20 | FAM7<br>2B   | Family with<br>sequence<br>similarity 72<br>member B             | 4.<br>81<br>14<br>4  | 3.<br>76<br>74<br>3 | 4.<br>33<br>53<br>2 | 7.<br>00<br>88<br>8 | 6.<br>35<br>93<br>6 | 5.<br>57<br>41<br>2 | 4.0<br>261<br>195<br>17  | 2.0<br>093<br>9          | 4.0<br>26<br>11<br>95<br>17 | U<br>p           | 0.0<br>02<br>23<br>84<br>85 | 0.2<br>11<br>69<br>45<br>53 |    |
| 68<br>67       | TACC<br>1    | Transforming,<br>acidic coiled-coil<br>containing protein<br>1   | 6.<br>34<br>63<br>1  | 7.<br>13<br>09<br>6 | 7.<br>15<br>34<br>4 | 3.<br>87<br>11      | 6.<br>27<br>16<br>8 | 5.<br>46<br>05<br>3 | -3.<br>194<br>964<br>719 | -1.<br>675<br>8          | 3.1<br>94<br>96<br>47<br>19 | D<br>o<br>w<br>n | 0.0<br>27<br>14<br>23<br>45 | 0.3<br>89<br>57<br>54<br>13 |    |
| 51<br>52<br>3  | CXXC<br>5    | CXXC finger<br>protein 5                                         | 7.<br>91<br>1        | 8.<br>11<br>92<br>9 | 7.<br>95<br>05<br>7 | 6.<br>51<br>56<br>9 | 7.<br>00<br>08<br>9 | 7.<br>18<br>12<br>6 | -2.<br>135<br>153<br>809 | -1.<br>094<br>34         | 2.1<br>35<br>15<br>38<br>09 | D<br>o<br>w<br>n | 0.0<br>02<br>93<br>17<br>53 | 0.2<br>31<br>33<br>53<br>69 |    |
| 73<br>66       | UGT2<br>B15  | UDP<br>glucuronosyltransf<br>erases 2 family,<br>polypeptide B15 | 10.<br>9<br>10<br>11 | 8.<br>01<br>51<br>7 | 8.<br>28<br>27<br>8 | 8.<br>06<br>83<br>1 | 6.<br>67<br>74<br>6 | 6.<br>25<br>52<br>4 | -4.<br>196<br>005<br>784 | -2.<br>069<br>016<br>667 | 4.1<br>96<br>00<br>57<br>84 | D<br>o<br>w<br>n | 0.0<br>42<br>98<br>40<br>93 | 0.4<br>32<br>07<br>88<br>1  |    |
| 89<br>92<br>7  | C16orf<br>45 | Chromosome 16<br>open reading<br>frame 45                        | 7.<br>15<br>51<br>4  | 7.<br>20<br>44<br>4 | 8.<br>18<br>35<br>2 | 5.<br>54<br>77<br>8 | 6.<br>51<br>20<br>1 | 5.<br>37<br>92<br>6 | -3.<br>252<br>051<br>265 | -1.<br>701<br>35         | 3.2<br>52<br>05<br>12<br>65 | D<br>o<br>w<br>n | 0.0<br>04<br>56<br>06<br>74 | 0.2<br>54<br>41<br>63<br>12 |    |
| 11<br>13<br>0  | ZWIN<br>T    | ZW10 interacting<br>kinetochore<br>protein                       | 5.<br>66<br>66<br>4  | 5.<br>26<br>78<br>2 | 5.<br>72<br>02<br>7 | 6.<br>88<br>52<br>7 | 6.<br>87<br>28<br>7 | 6.<br>26<br>27<br>9 | 2.1<br>765<br>854<br>61  | 1.1<br>220<br>666<br>67  | 2.1<br>76<br>58<br>54<br>61 | U<br>p           | 0.0<br>03<br>82<br>37<br>31 | 0.2<br>38<br>90<br>72<br>74 |    |
| 55<br>42<br>82 | FAM7<br>2C   | Family with<br>sequence<br>similarity 72<br>member C             | 4.<br>81<br>14<br>4  | 3.<br>76<br>74<br>3 | 4.<br>33<br>53<br>2 | 7.<br>00<br>88<br>8 | 6.<br>35<br>93<br>6 | 5.<br>57<br>41<br>2 | 4.0<br>261<br>195<br>17  | 2.0<br>093<br>9          | 4.0<br>26<br>11<br>95<br>17 | U<br>p           | 0.0<br>02<br>23<br>84<br>85 | 0.2<br>11<br>69<br>45<br>53 |    |
| 83<br>93<br>8  | C10orf<br>11 | Chromosome 10<br>open reading<br>frame 11                        | 7.<br>17<br>64<br>1  | 8.<br>43<br>51<br>3 | 8.<br>03<br>22<br>2 | 5.<br>76<br>64<br>1 | 5.<br>66<br>67<br>3 | 6.<br>74<br>73<br>2 | -3.<br>533<br>505<br>121 | -1.<br>821<br>1          | 3.5<br>33<br>50<br>51<br>21 | D<br>o<br>w<br>n | 0.0<br>03<br>80<br>95<br>74 | 0.2<br>38<br>90<br>72<br>74 |    |
| 97<br>62       | LZTS3        | Leucine zipper,<br>putative tumor<br>suppressor family           | 7.<br>57<br>70       | 8.<br>33<br>33      | 8.<br>09<br>42      | 6.<br>83<br>05      | 6.<br>79<br>36      | 7.<br>10<br>01      | -2.<br>133<br>787        | -1.<br>093<br>416        | 2.1<br>33<br>78             | D<br>o<br>w      | 0.0<br>04<br>25             | 0.2<br>46<br>47             |    |

|                |              |                                                                              |                     |                      |                      |                     |                     |                     |                          |                          |                             |                  |                             |                             |
|----------------|--------------|------------------------------------------------------------------------------|---------------------|----------------------|----------------------|---------------------|---------------------|---------------------|--------------------------|--------------------------|-----------------------------|------------------|-----------------------------|-----------------------------|
|                |              | member 3                                                                     | 4                   |                      |                      | 6                   | 2                   | 1                   | 735                      | 667                      | 77<br>35                    | n                | 83<br>49                    | 32<br>18                    |
| 10<br>96<br>1  | ERP29        | Endoplasmic<br>reticulum protein<br>29                                       | 7.<br>39<br>11<br>5 | 6.<br>99<br>82<br>9  | 7.<br>05<br>5        | 5.<br>82<br>59<br>5 | 6.<br>07<br>31<br>9 | 5.<br>89<br>82<br>1 | -2.<br>322<br>529<br>09  | -1.<br>215<br>696<br>667 | 2.3<br>22<br>52<br>90<br>9  | D<br>o<br>w<br>n | 0.0<br>00<br>77<br>12<br>53 | 0.1<br>77<br>73<br>29<br>45 |
| 55<br>43<br>13 | HIST2<br>H4B | Histone cluster 2,<br>h4b                                                    | 8.<br>73<br>56<br>8 | 8.<br>01<br>41<br>9  | 8.<br>24<br>88<br>9  | 9.<br>86<br>20<br>7 | 9.<br>68<br>07<br>1 | 8.<br>55<br>79      | 2.0<br>476<br>559<br>52  | 1.0<br>339<br>733<br>33  | 2.0<br>47<br>65<br>59<br>52 | U<br>p           | 0.0<br>35<br>06<br>84<br>07 | 0.4<br>08<br>55<br>78<br>26 |
| 37<br>09       | ITPR2        | Inositol<br>1,4,5-trisphosphat<br>e receptor, type 2                         | 5.<br>63<br>11<br>5 | 7.<br>18<br>69<br>8  | 7.<br>17<br>77<br>4  | 4.<br>51<br>31<br>2 | 5.<br>85<br>81<br>8 | 4.<br>73<br>41<br>5 | -3.<br>095<br>430<br>355 | -1.<br>630<br>14<br>355  | 3.0<br>95<br>43<br>03<br>55 | D<br>o<br>w<br>n | 0.0<br>18<br>97<br>82<br>62 | 0.3<br>67<br>34<br>80<br>71 |
| 21<br>4        | ALCA<br>M    | Activated<br>leukocyte cell<br>adhesion molecule                             | 8.<br>62<br>22<br>1 | 8.<br>95<br>81<br>1  | 8.<br>35<br>47<br>1  | 6.<br>97<br>25<br>4 | 7.<br>99<br>18<br>9 | 6.<br>35<br>10<br>9 | -2.<br>907<br>676<br>296 | -1.<br>539<br>866<br>667 | 2.9<br>07<br>67<br>62<br>96 | D<br>o<br>w<br>n | 0.0<br>09<br>02<br>80<br>51 | 0.3<br>09<br>79<br>61<br>38 |
| 26<br>25<br>5  | PTTG3<br>P   | Pituitary<br>tumor-transformin<br>g 3, pseudogene                            | 4.<br>44<br>43<br>1 | 4.<br>07<br>68<br>1  | 4.<br>48<br>38<br>5  | 6.<br>19<br>54<br>4 | 6.<br>81<br>31      | 5.<br>63<br>29<br>9 | 3.6<br>778<br>262<br>72  | 1.8<br>788<br>533<br>33  | 3.6<br>77<br>82<br>62<br>72 | U<br>p           | 0.0<br>00<br>72<br>00<br>42 | 0.1<br>72<br>63<br>18<br>47 |
| 52<br>25       | PGC          | Progastricsin<br>(pepsinogen C)                                              | 4.<br>45<br>76<br>9 | 14<br>.1<br>75<br>86 | 13<br>.9<br>16<br>86 | 4.<br>84<br>13<br>1 | 4.<br>21<br>68      | 4.<br>87<br>89<br>2 | -73<br>.74<br>431<br>857 | -6.<br>204<br>46         | 73.<br>74<br>43<br>18<br>57 | D<br>o<br>w<br>n | 0.0<br>38<br>90<br>03<br>93 | 0.4<br>20<br>99<br>70<br>79 |
| 74<br>14       | VCL          | Vinculin                                                                     | 6.<br>79<br>58<br>4 | 6.<br>31<br>03       | 5.<br>97<br>90<br>8  | 7.<br>32<br>69<br>9 | 8.<br>53<br>85<br>1 | 7.<br>30<br>86<br>8 | 2.5<br>721<br>711<br>95  | 1.3<br>629<br>866<br>67  | 2.5<br>72<br>17<br>11<br>95 | U<br>p           | 0.0<br>11<br>88<br>49       | 0.3<br>30<br>28<br>63<br>88 |
| 25<br>75<br>9  | SHC2         | SHC (Src<br>homology 2<br>domain<br>containing)<br>transforming<br>protein 2 | 6.<br>79<br>34<br>3 | 7.<br>28<br>65<br>7  | 6.<br>86<br>54<br>8  | 6.<br>37<br>28      | 5.<br>23<br>02<br>8 | 6.<br>05<br>61<br>6 | -2.<br>136<br>742<br>907 | -1.<br>095<br>413<br>333 | 2.1<br>36<br>74<br>29<br>07 | D<br>o<br>w<br>n | 0.0<br>14<br>46<br>33<br>41 | 0.3<br>46<br>82<br>70<br>31 |
| 64             | SRSF1        | Serine/arginine-ric                                                          | 6.                  | 6.                   | 6.                   | 7.                  | 7.                  | 7.                  | 2.1                      | 1.0                      | 2.1                         | U                | 0.0                         | 0.3                         |



|                |               |                                                                |                     |                     |                     |                     |                     |                     |                          |                             |                             |                  |                             |                             |
|----------------|---------------|----------------------------------------------------------------|---------------------|---------------------|---------------------|---------------------|---------------------|---------------------|--------------------------|-----------------------------|-----------------------------|------------------|-----------------------------|-----------------------------|
| 26             |               | h splicing factor 1                                            | 05<br>43<br>2       | 97<br>21            | 68<br>23<br>3       | 93<br>54<br>2       | 32<br>61<br>4       | 71<br>55<br>3       | 279<br>240<br>61         | 894<br>466<br>67            | 27<br>92<br>40<br>61        | p                | 09<br>69<br>02<br>4         | 13<br>66<br>02<br>93        |
| 22<br>84<br>1  | RAB11<br>FIP2 | RAB11 family<br>interacting protein<br>2 (class I)             | 7.<br>85<br>45<br>2 | 7.<br>68<br>14<br>9 | 7.<br>91<br>6<br>2  | 6.<br>46<br>62<br>9 | 6.<br>91<br>73<br>9 | 6.<br>61<br>42<br>7 | -2.<br>221<br>257<br>53  | -1.<br>151<br>376<br>667    | 2.2<br>21<br>25<br>75<br>3  | D<br>o<br>w<br>n | 0.0<br>01<br>17<br>49<br>03 | 0.1<br>86<br>14<br>79<br>2  |
| 10<br>54       | CEBP<br>G     | CCAAT/enhancer<br>binding protein<br>(C/EBP), $\gamma$         | 5.<br>60<br>17<br>3 | 5.<br>05<br>3<br>3  | 5.<br>62<br>33<br>3 | 6.<br>30<br>11<br>4 | 6.<br>83<br>74<br>6 | 7.<br>05<br>88<br>4 | 2.4<br>733<br>390<br>15  | 1.3<br>064<br>6<br>90<br>15 | 2.4<br>73<br>33<br>90<br>15 | U<br>p           | 0.0<br>02<br>70<br>11<br>7  | 0.2<br>26<br>76<br>71<br>12 |
| 18<br>71       | E2F3          | E2F transcription<br>factor 3                                  | 4.<br>21<br>22<br>4 | 3.<br>91<br>08<br>9 | 3.<br>77<br>59<br>8 | 5.<br>13<br>73<br>8 | 4.<br>68<br>96<br>6 | 5.<br>15<br>09<br>8 | 2.0<br>368<br>362<br>49  | 1.0<br>263<br>3<br>49       | 2.0<br>36<br>83<br>62<br>49 | U<br>p           | 0.0<br>02<br>25<br>81<br>33 | 0.2<br>11<br>69<br>45<br>53 |
| 55<br>65<br>2  | SLC48<br>A1   | Solute carrier<br>family 48 (heme<br>transporter),<br>member 1 | 7.<br>22<br>80<br>7 | 6.<br>95<br>99<br>7 | 6.<br>94<br>07<br>7 | 5.<br>03<br>35<br>9 | 5.<br>47<br>80<br>1 | 5.<br>52<br>62<br>3 | -3.<br>242<br>245<br>497 | -1.<br>696<br>993<br>333    | 3.2<br>42<br>24<br>54<br>97 | D<br>o<br>w<br>n | 0.0<br>00<br>15<br>63       | 0.1<br>28<br>62<br>18<br>94 |
| 37<br>42<br>86 | CDRT<br>1     | CMT1A<br>duplicated region<br>transcript 1                     | 4.<br>16<br>91<br>4 | 5.<br>45<br>48<br>3 | 5.<br>29<br>83<br>3 | 4.<br>14<br>97<br>6 | 3.<br>24<br>73<br>8 | 3.<br>82<br>49<br>6 | -2.<br>351<br>188<br>162 | -1.<br>233<br>39<br>162     | 2.3<br>51<br>18<br>81<br>62 | D<br>o<br>w<br>n | 0.0<br>17<br>65<br>37<br>54 | 0.3<br>61<br>12<br>33<br>37 |
| 32<br>16       | HOXB<br>6     | Homeobox B6                                                    | 5.<br>21<br>4       | 3.<br>84<br>47<br>4 | 4.<br>47<br>72<br>3 | 7.<br>35<br>89<br>9 | 6.<br>47<br>64<br>7 | 8.<br>33<br>70<br>6 | 7.3<br>556<br>355<br>49  | 2.8<br>788<br>5<br>49       | 7.3<br>55<br>63<br>55<br>49 | U<br>p           | 0.0<br>01<br>10<br>11<br>94 | 0.1<br>86<br>14<br>79<br>2  |
| 25<br>48<br>96 | LOC25<br>4896 | Uncharacterized<br>LOC254896                                   | 7.<br>34<br>89      | 7.<br>40<br>31<br>1 | 7.<br>61<br>38<br>5 | 7.<br>17<br>95<br>3 | 5.<br>24<br>00<br>7 | 5.<br>70<br>63<br>2 | -2.<br>663<br>481<br>635 | -1.<br>413<br>313<br>333    | 2.6<br>63<br>48<br>16<br>35 | D<br>o<br>w<br>n | 0.0<br>22<br>73<br>81<br>22 | 0.3<br>79<br>55<br>65<br>1  |
| 40<br>08       | LMO7          | LIM domain 7                                                   | 4.<br>95<br>74<br>8 | 5.<br>12<br>42<br>1 | 5.<br>41<br>74<br>2 | 5.<br>87<br>34<br>1 | 7.<br>28<br>84<br>3 | 6.<br>14<br>35      | 2.4<br>095<br>159<br>2   | 1.2<br>687<br>433<br>33     | 2.4<br>09<br>51<br>59<br>2  | U<br>p           | 0.0<br>14<br>02<br>43<br>92 | 0.3<br>45<br>57<br>11<br>86 |

|                           |                    |                                                                                                                                                   |                      |                     |                     |                     |                     |                     |                          |                          |                             |                  |                             |                             |
|---------------------------|--------------------|---------------------------------------------------------------------------------------------------------------------------------------------------|----------------------|---------------------|---------------------|---------------------|---------------------|---------------------|--------------------------|--------------------------|-----------------------------|------------------|-----------------------------|-----------------------------|
| 64<br>75<br>6             | ATPAF<br>1         | ATP synthase<br>mitochondrial F1<br>complex assembly<br>factor 1                                                                                  | 7.<br>51<br>16<br>6  | 7.<br>19<br>41<br>8 | 7.<br>19<br>17<br>9 | 5.<br>80<br>50<br>6 | 6.<br>82<br>54      | 5.<br>87<br>00<br>5 | -2.<br>192<br>190<br>744 | -1.<br>132<br>373<br>333 | 2.1<br>92<br>19<br>07<br>44 | D<br>o<br>w<br>n | 0.0<br>09<br>85<br>85<br>47 | 0.3<br>15<br>70<br>78<br>58 |
| 25<br>94<br>5             | PVRL3              | Poliovirus<br>receptor-related 3                                                                                                                  | 7.<br>65<br>81       | 8.<br>07<br>38<br>8 | 7.<br>86<br>16<br>3 | 6.<br>19<br>89<br>9 | 7.<br>58<br>30<br>7 | 6.<br>39<br>50<br>5 | -2.<br>202<br>028<br>793 | -1.<br>138<br>833<br>333 | 2.2<br>02<br>02<br>87<br>93 | D<br>o<br>w<br>n | 0.0<br>22<br>13<br>76<br>16 | 0.3<br>78<br>35<br>72<br>21 |
| 11<br>62<br>55            | MOGA<br>T1         | Monoacylglycerol<br>O-acyltransferase<br>1                                                                                                        | 9.<br>72<br>81       | 9.<br>17<br>82<br>5 | 9.<br>66<br>55      | 8.<br>99<br>75      | 5.<br>75<br>48      | 2.<br>89<br>75<br>8 | -12<br>.47<br>230<br>896 | -3.<br>640<br>656<br>667 | 12.<br>47<br>23<br>08<br>96 | D<br>o<br>w<br>n | 0.0<br>31<br>77<br>90<br>4  | 0.4<br>02<br>73<br>83<br>8  |
| 10<br>61<br>0             | ST6G<br>ALNA<br>C2 | ST6<br>( $\alpha$ -N-acetyl-neura<br>minyl-2,3- $\beta$ -galact<br>osyl-1,3)-N-acetyl<br>galactosaminide<br>$\alpha$ -2,6-sialyltransfer<br>ase 2 | 4.<br>09<br>84<br>9  | 3.<br>77<br>27<br>4 | 3.<br>39<br>78<br>6 | 5.<br>45<br>30<br>7 | 4.<br>54<br>44<br>2 | 5.<br>64<br>19      | 2.7<br>449<br>248<br>78  | 1.4<br>567<br>666<br>67  | 2.7<br>44<br>92<br>48<br>78 | U<br>p           | 0.0<br>03<br>64<br>04<br>06 | 0.2<br>38<br>59<br>85<br>3  |
| 15<br>09                  | CTSD               | Cathepsin D                                                                                                                                       | 10<br>.8<br>07<br>11 | 9.<br>99<br>21<br>7 | 9.<br>90<br>14<br>8 | 8.<br>18<br>5       | 9.<br>37<br>03      | 8.<br>52<br>46<br>1 | -2.<br>908<br>516<br>187 | -1.<br>540<br>283<br>333 | 2.9<br>08<br>51<br>61<br>87 | D<br>o<br>w<br>n | 0.0<br>05<br>80<br>72<br>64 | 0.2<br>76<br>07<br>88<br>98 |
| 26<br>04<br>7             | CNTN<br>AP2        | Contactin<br>associated<br>protein-like 2                                                                                                         | 4.<br>23<br>59<br>2  | 4.<br>52<br>35<br>2 | 4.<br>42<br>70<br>5 | 7.<br>32<br>03<br>6 | 5.<br>89<br>15<br>7 | 4.<br>59<br>87<br>7 | 2.9<br>107<br>750<br>17  | 1.5<br>414<br>033<br>33  | 2.9<br>10<br>77<br>50<br>17 | U<br>p           | 0.0<br>43<br>25<br>20<br>23 | 0.4<br>32<br>33<br>09<br>01 |
| 15<br>76<br>95            | TDRP               | Testis<br>development<br>related protein                                                                                                          | 5.<br>52<br>44       | 5.<br>48<br>57<br>9 | 5.<br>27<br>67<br>9 | 4.<br>08<br>95<br>2 | 4.<br>61<br>33<br>5 | 4.<br>23<br>06<br>1 | -2.<br>170<br>208<br>017 | -1.<br>117<br>833<br>333 | 2.1<br>70<br>20<br>80<br>17 | D<br>o<br>w<br>n | 0.0<br>01<br>19<br>26<br>05 | 0.1<br>86<br>14<br>79<br>2  |
| 10<br>01<br>28<br>25<br>2 | ZNF66<br>7-AS1     | ZNF667 antisense<br>RNA 1 (head to<br>head)                                                                                                       | 6.<br>74<br>06<br>1  | 6.<br>61<br>25<br>3 | 7.<br>61<br>35<br>6 | 3.<br>73<br>47<br>3 | 5.<br>78<br>63<br>1 | 4.<br>56<br>71      | -4.<br>900<br>243<br>136 | -2.<br>292<br>853<br>333 | 4.9<br>00<br>24<br>31<br>36 | D<br>o<br>w<br>n | 0.0<br>03<br>99<br>48<br>97 | 0.2<br>42<br>71<br>06<br>82 |
| 40<br>57                  | LTF                | Lactotransferrin                                                                                                                                  | 5.<br>21             | 12<br>.5            | 12<br>.2            | 4.<br>99            | 5.<br>74            | 5.<br>91            | -21<br>.51               | -4.<br>427               | 21.<br>51                   | D<br>o           | 0.0<br>46                   | 0.4<br>41                   |

|                |             |                                                  |                     |                     |                     |                     |                       |                     |                          |                          |                             |                  |                             |                             |
|----------------|-------------|--------------------------------------------------|---------------------|---------------------|---------------------|---------------------|-----------------------|---------------------|--------------------------|--------------------------|-----------------------------|------------------|-----------------------------|-----------------------------|
|                |             |                                                  | 43<br>7             | 19<br>32            | 05<br>24            | 38<br>7             | 67<br>7               | 62<br>8             | 598<br>028               | 336<br>667               | 59<br>80<br>28              | w<br>n           | 79<br>79<br>98              | 19<br>21<br>25              |
| 80<br>78<br>1  | COL18<br>A1 | Collagen, type XVIII, $\alpha$ 1                 | 8.<br>94<br>47<br>1 | 9.<br>27<br>90<br>6 | 9.<br>08<br>64<br>2 | 8.<br>44<br>83<br>1 | 7.<br>54<br>59<br>1   | 7.<br>34<br>50<br>7 | -2.<br>502<br>956<br>7   | -1.<br>323<br>633<br>333 | 2.5<br>02<br>95<br>67       | D<br>o<br>w<br>n | 0.0<br>04<br>92<br>94<br>66 | 0.2<br>62<br>38<br>32<br>57 |
| 11<br>71<br>53 | MIA2        | Melanoma inhibitory activity 2                   | 4.<br>49<br>85      | 4.<br>45<br>24<br>6 | 4.<br>60<br>62<br>8 | 2.<br>64<br>04<br>8 | 3.<br>04<br>38<br>6   | 4.<br>31<br>69<br>6 | -2.<br>274<br>127<br>802 | -1.<br>185<br>313<br>333 | 2.2<br>74<br>12<br>78<br>02 | D<br>o<br>w<br>n | 0.0<br>23<br>95<br>93<br>49 | 0.3<br>81<br>89<br>69<br>49 |
| 20<br>30<br>68 | TUBB        | Tubulin, $\beta$ class I                         | 8.<br>77<br>14<br>9 | 8.<br>39<br>9       | 8.<br>31<br>69<br>8 | 9.<br>49<br>14<br>9 | 10.<br>.2<br>14<br>69 | 8.<br>85<br>20<br>9 | 2.0<br>329<br>856<br>05  | 1.0<br>236<br>56         | 2.0<br>32<br>98<br>56<br>05 | U<br>p           | 0.0<br>27<br>40<br>97<br>84 | 0.3<br>89<br>83<br>37<br>07 |
| 20<br>32<br>28 | C9orf7<br>2 | Chromosome 9 open reading frame 72               | 6.<br>47<br>45<br>5 | 6.<br>15<br>06<br>2 | 6.<br>39<br>92<br>9 | 7.<br>07<br>55<br>6 | 8.<br>16<br>77        | 6.<br>90<br>24<br>7 | 2.0<br>568<br>311<br>05  | 1.0<br>404<br>233<br>33  | 2.0<br>56<br>83<br>11<br>05 | U<br>p           | 0.0<br>23<br>80<br>36<br>74 | 0.3<br>81<br>26<br>89<br>97 |
| 87<br>41       | TNFSF<br>13 | Tumor necrosis factor superfamily member 13      | 8.<br>30<br>84<br>8 | 8.<br>37<br>08<br>2 | 9.<br>27<br>54<br>4 | 7.<br>44<br>21<br>4 | 7.<br>87<br>41<br>9   | 6.<br>30<br>38<br>9 | -2.<br>722<br>326<br>301 | -1.<br>444<br>84         | 2.7<br>22<br>32<br>63<br>01 | D<br>o<br>w<br>n | 0.0<br>17<br>59<br>14<br>11 | 0.3<br>61<br>12<br>33<br>37 |
| 11<br>49<br>07 | FBXO<br>32  | F-box protein 32                                 | 6.<br>35<br>39<br>7 | 6.<br>49<br>91<br>6 | 6.<br>46<br>61<br>5 | 6.<br>91<br>63<br>3 | 8.<br>76<br>32<br>5   | 7.<br>90<br>57<br>1 | 2.6<br>795<br>733<br>96  | 1.4<br>220<br>033<br>33  | 2.6<br>79<br>57<br>33<br>96 | U<br>p           | 0.0<br>15<br>66<br>60<br>91 | 0.3<br>50<br>84<br>39<br>38 |
| 50<br>51<br>5  | CHST1<br>1  | Carbohydrate (chondroitin 4) sulfotransferase 11 | 7.<br>88<br>18<br>2 | 7.<br>15<br>34<br>3 | 6.<br>95<br>65<br>1 | 5.<br>41<br>08<br>4 | 7.<br>11<br>32<br>1   | 5.<br>59<br>73<br>1 | -2.<br>445<br>506<br>558 | -1.<br>290<br>133<br>333 | 2.4<br>45<br>50<br>65<br>58 | D<br>o<br>w<br>n | 0.0<br>36<br>06<br>96<br>75 | 0.4<br>12<br>47<br>33<br>32 |
| 18<br>38       | DTNB        | Dystrobrevin $\beta$                             | 7.<br>70<br>58<br>7 | 8.<br>08<br>23<br>1 | 8.<br>03<br>35<br>9 | 5.<br>83<br>69<br>8 | 6.<br>05<br>74<br>2   | 6.<br>30<br>12<br>9 | -3.<br>668<br>931<br>578 | -1.<br>875<br>36         | 3.6<br>68<br>93<br>15<br>78 | D<br>o<br>w<br>n | 8.4<br>19<br>04<br>E-<br>05 | 0.1<br>26<br>50<br>89<br>75 |
| 26             | GJA1        | Gap junction                                     | 11                  | 9.                  | 10                  | 9.                  | 9.                    | 8.                  | -3.                      | -1.                      | 3.1                         | D                | 0.0                         | 0.3                         |

|                |               |                                        |                     |                     |                     |                     |                     |                     |                          |                          |                             |                  |                             |                             |
|----------------|---------------|----------------------------------------|---------------------|---------------------|---------------------|---------------------|---------------------|---------------------|--------------------------|--------------------------|-----------------------------|------------------|-----------------------------|-----------------------------|
| 97             |               | protein $\alpha$ 1                     | .5<br>93<br>41      | 84<br>50<br>7       | .9<br>77<br>4       | 70<br>87<br>7       | 25<br>39<br>5       | 46<br>39<br>7       | 166<br>882<br>484        | 663<br>063<br>333        | 66<br>88<br>24<br>84        | o<br>w<br>n      | 14<br>21<br>92<br>81        | 46<br>79<br>70<br>53        |
| 64<br>48<br>44 | PHGR<br>1     | Proline/histidine/g<br>lycine-rich 1   | 4.<br>21<br>45<br>7 | 4.<br>88<br>42<br>7 | 5.<br>02<br>97<br>7 | 6.<br>79<br>19<br>6 | 9.<br>11<br>85<br>9 | 5.<br>24<br>20<br>5 | 5.0<br>677<br>780<br>23  | 2.3<br>413<br>533<br>33  | 5.0<br>67<br>77<br>80<br>23 | U<br>p           | 0.0<br>34<br>93<br>59<br>97 | 0.4<br>08<br>42<br>81<br>41 |
| 15<br>30<br>90 | DAB2I<br>P    | DAB2 interacting<br>protein            | 8.<br>22<br>47      | 8.<br>29<br>75<br>9 | 8.<br>24<br>63<br>1 | 7.<br>40<br>64<br>1 | 7.<br>04<br>11      | 7.<br>15<br>73      | -2.<br>077<br>137<br>421 | -1.<br>054<br>596<br>667 | 2.0<br>77<br>13<br>74<br>21 | D<br>o<br>w<br>n | 0.0<br>01<br>32<br>83<br>93 | 0.1<br>87<br>10<br>78<br>18 |
| 83<br>43       | HIST1<br>H2BF | Histone cluster 1,<br>h2bf             | 7.<br>34<br>51<br>3 | 6.<br>40<br>79<br>9 | 6.<br>40<br>99<br>4 | 8.<br>42<br>02<br>7 | 9.<br>50<br>46<br>8 | 8.<br>17<br>31<br>6 | 3.9<br>404<br>216<br>08  | 1.9<br>783<br>5<br>16    | 3.9<br>40<br>42<br>16<br>08 | U<br>p           | 0.0<br>02<br>63<br>46<br>82 | 0.2<br>24<br>74<br>75<br>95 |
| 26<br>03<br>1  | OSBP<br>L3    | Oxysterol binding<br>protein like 3    | 6.<br>34<br>27<br>9 | 5.<br>78<br>5<br>7  | 6.<br>39<br>64<br>7 | 7.<br>93<br>16<br>8 | 7.<br>53<br>25<br>3 | 7.<br>28<br>68<br>3 | 2.6<br>553<br>953<br>37  | 1.4<br>089<br>266<br>67  | 2.6<br>55<br>39<br>53<br>37 | U<br>p           | 0.0<br>01<br>45<br>80<br>2  | 0.1<br>87<br>10<br>78<br>18 |
| 12<br>91       | COL6<br>A1    | Collagen, type VI,<br>$\alpha$ 1       | 8.<br>72<br>34<br>7 | 7.<br>78<br>59<br>2 | 7.<br>59<br>68<br>7 | 8.<br>43<br>79<br>9 | 9.<br>24<br>99<br>8 | 9.<br>84<br>65<br>9 | 2.2<br>080<br>405<br>49  | 1.1<br>427<br>666<br>67  | 2.2<br>08<br>04<br>05<br>49 | U<br>p           | 0.0<br>38<br>39<br>73<br>6  | 0.4<br>19<br>34<br>43<br>95 |
| 79<br>69<br>4  | MANE<br>A     | Mannosidase,<br>endo- $\alpha$         | 7.<br>99<br>40<br>3 | 9.<br>29<br>43<br>9 | 8.<br>53<br>10<br>4 | 6.<br>79<br>99<br>8 | 7.<br>77<br>65<br>6 | 6.<br>60<br>86<br>3 | -2.<br>917<br>562<br>038 | -1.<br>544<br>763<br>333 | 2.9<br>17<br>56<br>20<br>38 | D<br>o<br>w<br>n | 0.0<br>09<br>83<br>90<br>49 | 0.3<br>15<br>60<br>08<br>4  |
| 23<br>67<br>0  | TMEM<br>2     | Transmembrane<br>protein 2             | 7.<br>13<br>97<br>6 | 8.<br>39<br>29<br>2 | 8.<br>40<br>21<br>9 | 6.<br>42<br>98<br>2 | 7.<br>17<br>08<br>4 | 7.<br>04<br>12      | -2.<br>140<br>087<br>82  | -1.<br>097<br>67         | 2.1<br>40<br>08<br>78<br>2  | D<br>o<br>w<br>n | 0.0<br>31<br>20<br>82<br>88 | 0.4<br>00<br>46<br>67<br>53 |
| 14<br>79<br>47 | ZNF54<br>2P   | Zinc finger protein<br>542, pseudogene | 5.<br>04<br>49<br>8 | 4.<br>94<br>68<br>3 | 5.<br>09<br>35<br>9 | 3.<br>22<br>84<br>8 | 4.<br>23<br>89<br>2 | 3.<br>61<br>82<br>8 | -2.<br>519<br>679<br>087 | -1.<br>333<br>24         | 2.5<br>19<br>67<br>90<br>87 | D<br>o<br>w<br>n | 0.0<br>01<br>86<br>83<br>71 | 0.1<br>95<br>55<br>85<br>68 |

|                |            |                                                                            |                     |                     |                     |                     |                     |                     |                          |                          |                             |                  |                             |                             |
|----------------|------------|----------------------------------------------------------------------------|---------------------|---------------------|---------------------|---------------------|---------------------|---------------------|--------------------------|--------------------------|-----------------------------|------------------|-----------------------------|-----------------------------|
| 74<br>74       | WNT5<br>A  | Wingless-type<br>MMTV<br>integration site<br>family member 5A              | 7.<br>79<br>37<br>3 | 7.<br>41<br>50<br>8 | 6.<br>68<br>61<br>4 | 5.<br>42<br>35<br>3 | 6.<br>68<br>85<br>6 | 6.<br>14<br>33<br>8 | -2.<br>318<br>449<br>014 | -1.<br>213<br>16         | 2.3<br>18<br>44<br>90<br>14 | D<br>o<br>w<br>n | 0.0<br>22<br>54<br>84<br>08 | 0.3<br>78<br>90<br>05<br>37 |
| 67<br>17       | SRI        | Sorcin                                                                     | 5.<br>61<br>15<br>9 | 6.<br>19<br>10<br>2 | 5.<br>83<br>71<br>8 | 6.<br>93<br>23<br>2 | 7.<br>79<br>69<br>2 | 8.<br>36<br>71      | 3.5<br>279<br>986<br>28  | 1.8<br>188<br>5          | 3.5<br>27<br>99<br>86<br>28 | U<br>p           | 0.0<br>02<br>31<br>61<br>4  | 0.2<br>12<br>91<br>59<br>14 |
| 13<br>78<br>72 | ADHF<br>E1 | Alcohol<br>dehydrogenase,<br>iron containing 1                             | 6.<br>15<br>33<br>4 | 7.<br>08<br>03<br>4 | 6.<br>62<br>79<br>8 | 4.<br>66<br>52<br>2 | 5.<br>54<br>19<br>5 | 5.<br>62<br>16<br>4 | -2.<br>539<br>040<br>37  | -1.<br>344<br>283<br>333 | 2.5<br>39<br>04<br>03<br>7  | D<br>o<br>w<br>n | 0.0<br>07<br>26<br>92<br>55 | 0.2<br>92<br>18<br>66<br>83 |
| 28<br>47<br>16 | RIMK<br>LA | Ribosomal<br>modification<br>protein rimk-like<br>family member A          | 5.<br>55<br>81<br>7 | 6.<br>78<br>52<br>2 | 6.<br>85<br>00<br>4 | 4.<br>73<br>64<br>5 | 5.<br>16<br>00<br>9 | 5.<br>71<br>49<br>7 | -2.<br>287<br>819<br>658 | -1.<br>193<br>973<br>333 | 2.2<br>87<br>81<br>96<br>58 | D<br>o<br>w<br>n | 0.0<br>26<br>41<br>74<br>81 | 0.3<br>87<br>35<br>84<br>1  |
| 51<br>65<br>9  | GINS2      | GINS complex<br>subunit 2 (Psf2<br>homolog)                                | 4.<br>97<br>71<br>2 | 5.<br>05<br>67<br>4 | 4.<br>96<br>10<br>4 | 6.<br>69<br>21<br>5 | 7.<br>14<br>49<br>7 | 6.<br>04<br>27<br>8 | 3.0<br>915<br>564<br>17  | 1.6<br>283<br>333<br>33  | 3.0<br>91<br>55<br>64<br>17 | U<br>p           | 0.0<br>01<br>07<br>41<br>31 | 0.1<br>86<br>14<br>79<br>2  |
| 25<br>92<br>4  | MYRI<br>P  | Myosin VIIA and<br>Rab interacting<br>protein                              | 5.<br>78<br>29<br>9 | 7.<br>12<br>40<br>3 | 6.<br>14<br>28<br>8 | 4.<br>85<br>72<br>1 | 5.<br>45<br>41      | 5.<br>69<br>20<br>1 | -2.<br>021<br>640<br>773 | -1.<br>015<br>526<br>667 | 2.0<br>21<br>64<br>07<br>73 | D<br>o<br>w<br>n | 0.0<br>39<br>36<br>88<br>71 | 0.4<br>22<br>57<br>97<br>15 |
| 51<br>74<br>7  | LUC7<br>L3 | LUC7-like 3<br>pre-mrna splicing<br>factor                                 | 5.<br>98<br>80<br>4 | 6.<br>39<br>68<br>4 | 6.<br>28<br>19<br>6 | 7.<br>06<br>42<br>2 | 7.<br>04<br>77<br>4 | 8.<br>15<br>81      | 2.2<br>991<br>065<br>59  | 1.2<br>010<br>733<br>33  | 2.2<br>99<br>10<br>65<br>59 | U<br>p           | 0.0<br>10<br>73<br>36<br>35 | 0.3<br>23<br>87<br>84<br>16 |
| 23<br>12<br>9  | PLXN<br>D1 | Plexin D1                                                                  | 7.<br>18<br>16<br>4 | 7.<br>34<br>01<br>2 | 7.<br>32<br>87<br>1 | 5.<br>60<br>49<br>8 | 6.<br>55<br>96      | 5.<br>61<br>89<br>8 | -2.<br>559<br>100<br>254 | -1.<br>355<br>636<br>667 | 2.5<br>59<br>10<br>02<br>54 | D<br>o<br>w<br>n | 0.0<br>03<br>06<br>72<br>17 | 0.2<br>34<br>04<br>90<br>49 |
| 57<br>1        | BACH<br>1  | BTB and CNC<br>homology 1, basic<br>leucine zipper<br>transcription factor | 4.<br>81<br>47<br>2 | 3.<br>57<br>04<br>6 | 3.<br>81<br>18<br>5 | 4.<br>65<br>38<br>8 | 6.<br>10<br>95<br>6 | 5.<br>64<br>22      | 2.6<br>442<br>709<br>27  | 1.4<br>028<br>7          | 2.6<br>44<br>27<br>09       | U<br>p           | 0.0<br>19<br>79<br>55       | 0.3<br>68<br>10<br>68       |

|                |              |                                                        |                      |                      |                      |                     |                     |                     |                          |                          |                             |                  |                             |                             |    |
|----------------|--------------|--------------------------------------------------------|----------------------|----------------------|----------------------|---------------------|---------------------|---------------------|--------------------------|--------------------------|-----------------------------|------------------|-----------------------------|-----------------------------|----|
|                |              | 1                                                      |                      |                      |                      |                     |                     |                     |                          |                          |                             | 27               |                             | 56                          | 92 |
| 15<br>82<br>19 | TTC39<br>B   | Tetratricopeptide repeat domain 39B                    | 6.<br>97<br>05<br>7  | 7.<br>30<br>86<br>2  | 8.<br>44<br>59<br>7  | 5.<br>16<br>19      | 7.<br>13<br>15<br>2 | 5.<br>99<br>69<br>2 | -2.<br>786<br>150<br>776 | -1.<br>478<br>273<br>333 | 2.7<br>86<br>15<br>07<br>76 | D<br>o<br>w<br>n | 0.0<br>38<br>63<br>69<br>58 | 0.4<br>19<br>56<br>12<br>9  |    |
| 26<br>17<br>26 | TIPRL        | TOR signaling pathway regulator                        | 6.<br>15<br>55<br>3  | 6.<br>69<br>20<br>8  | 6.<br>57<br>50<br>3  | 8.<br>13<br>92<br>8 | 7.<br>44<br>39<br>6 | 7.<br>20<br>47<br>6 | 2.1<br>761<br>630<br>67  | 1.1<br>217<br>866<br>67  | 2.1<br>76<br>16<br>30<br>67 | U<br>p           | 0.0<br>08<br>42<br>01<br>82 | 0.3<br>05<br>83<br>03<br>66 |    |
| 53<br>3        | ATP6V<br>0B  | Atpase, H+ transporting, lysosomal 21kda, V0 subunit b | 7.<br>55<br>60<br>7  | 7.<br>28<br>67<br>7  | 7.<br>36<br>23<br>4  | 5.<br>94<br>94<br>2 | 6.<br>36<br>68<br>4 | 5.<br>18<br>97<br>1 | -2.<br>961<br>654<br>468 | -1.<br>566<br>403<br>333 | 2.9<br>61<br>65<br>44<br>68 | D<br>o<br>w<br>n | 0.0<br>02<br>00<br>59<br>75 | 0.2<br>02<br>25<br>09<br>29 |    |
| 23<br>12<br>7  | COLG<br>ALT2 | Collagen $\beta$ (1-O)galactosyltransferase 2          | 4.<br>28<br>74<br>5  | 9.<br>90<br>76<br>9  | 9.<br>50<br>45<br>5  | 3.<br>90<br>41<br>5 | 4.<br>35<br>13<br>7 | 5.<br>24<br>78<br>9 | -10<br>.54<br>699<br>422 | -3.<br>398<br>76         | 10.<br>54<br>69<br>94<br>22 | D<br>o<br>w<br>n | 0.0<br>48<br>16<br>85<br>89 | 0.4<br>44<br>29<br>99<br>39 |    |
| 10<br>74<br>2  | RAI2         | Retinoic acid induced 2                                | 8.<br>42<br>07       | 8.<br>54<br>27<br>1  | 8.<br>61<br>07<br>6  | 6.<br>48<br>55<br>6 | 7.<br>53<br>50<br>2 | 7.<br>94<br>94<br>8 | -2.<br>299<br>579<br>381 | -1.<br>201<br>37         | 2.2<br>99<br>57<br>93<br>81 | D<br>o<br>w<br>n | 0.0<br>16<br>47<br>38<br>86 | 0.3<br>55<br>13<br>62<br>17 |    |
| 72<br>78<br>97 | MUC5<br>B    | Mucin 5B, oligomeric mucus/gel-formin g                | 10<br>.0<br>86<br>52 | 10<br>.8<br>17<br>83 | 10<br>.9<br>97<br>71 | 9.<br>78<br>95<br>5 | 7.<br>50<br>96<br>9 | 8.<br>06<br>89<br>6 | -4.<br>525<br>111<br>476 | -2.<br>177<br>953<br>333 | 4.5<br>25<br>11<br>14<br>76 | D<br>o<br>w<br>n | 0.0<br>08<br>01<br>83<br>31 | 0.2<br>99<br>13<br>95<br>54 |    |
| 69<br>26       | TBX3         | T-box 3                                                | 5.<br>76<br>93<br>1  | 7.<br>37<br>92<br>7  | 7.<br>70<br>59<br>3  | 4.<br>92<br>14<br>4 | 6.<br>19<br>24<br>2 | 5.<br>41<br>44<br>2 | -2.<br>717<br>116<br>956 | -1.<br>442<br>076<br>667 | 2.7<br>17<br>11<br>69<br>56 | D<br>o<br>w<br>n | 0.0<br>38<br>28<br>49<br>78 | 0.4<br>19<br>01<br>93<br>74 |    |
| 69<br>41       | TCF19        | Transcription factor 19                                | 5.<br>90<br>36<br>1  | 4.<br>94<br>78<br>8  | 4.<br>96<br>62<br>9  | 6.<br>07<br>74<br>6 | 6.<br>77<br>82<br>5 | 6.<br>04<br>18<br>5 | 2.0<br>371<br>845<br>3   | 1.0<br>265<br>766<br>67  | 2.0<br>37<br>18<br>45<br>3  | U<br>p           | 0.0<br>22<br>32<br>45<br>08 | 0.3<br>78<br>66<br>05<br>33 |    |
| 50<br>04       | ORM1         | Orosomuroid 1                                          | 3.<br>80<br>83       | 4.<br>63<br>54       | 5.<br>54<br>52       | 6.<br>97<br>44      | 8.<br>07<br>24      | 5.<br>47<br>83      | 4.5<br>276<br>946        | 2.1<br>787<br>766        | 4.5<br>27<br>69             | U<br>p           | 0.0<br>18<br>27             | 0.3<br>64<br>08             |    |

|                |           |                                                                                                 |         |         |         |           |           |         |           |           |           |                  |             |              |
|----------------|-----------|-------------------------------------------------------------------------------------------------|---------|---------|---------|-----------|-----------|---------|-----------|-----------|-----------|------------------|-------------|--------------|
|                |           |                                                                                                 | 1       | 1       | 6       | 8         | 4         | 9       | 54        | 67        | 46        |                  | 69          | 78           |
| 28<br>56<br>71 | RNF180    | Ring finger protein 180                                                                         | 5.6419  | 6.5101  | 6.03617 | 3.14281   | 5.44105   | 5.15065 | -2.798305 | -1.484553 | 2.798305  | D<br>o<br>w<br>n | 0.044575    | 0.4352941    |
| 11<br>64       | CKS2      | CDC28 protein kinase regulatory subunit 2                                                       | 5.35426 | 4.33286 | 5.19969 | 7.73001   | 6.95544   | 5.80284 | 3.648137  | 1.86716   | 3.648137  | U<br>p           | 0.00911485  | 0.31047429   |
| 40<br>05<br>81 | GRAPL     | GRB2-related adaptor protein-like                                                               | 5.31815 | 7.64792 | 6.615   | 4.71043   | 4.87504   | 5.41042 | -2.884644 | -1.528393 | 2.884644  | D<br>o<br>w<br>n | 0.030863593 | 0.3993030908 |
| 11<br>06<br>5  | UBE2C     | Ubiquitin conjugating enzyme E2C                                                                | 6.1793  | 5.17869 | 5.40581 | 7.77279   | 8.76221   | 7.19619 | 5.0018553 | 2.3224633 | 5.0018553 | U<br>p           | 0.00144852  | 0.187107818  |
| 46<br>80       | CEACAM6   | Carcinoembryonic antigen-related cell adhesion molecule 6 (non-specific cross reacting antigen) | 6.96745 | 7.10356 | 7.66467 | 10.070656 | 10.036336 | 11.0236 | 10.606276 | 3.4068466 | 10.606276 | U<br>p           | 3.111E-05   | 0.0960542    |
| 39<br>98<br>44 | LINC01002 | Long intergenic non-protein coding RNA 1002                                                     | 8.03359 | 8.30848 | 7.49201 | 5.71049   | 6.09297   | 7.81824 | -2.646575 | -1.404126 | 2.646575  | D<br>o<br>w<br>n | 0.040058298 | 0.424359444  |
| 40<br>57<br>53 | DUOX2     | Dual oxidase maturation factor 2                                                                | 9.43212 | 6.93978 | 8.33202 | 6.51114   | 7.12037   | 6.51971 | -2.863077 | -1.517566 | 2.863077  | D<br>o<br>w<br>n | 0.039203222 | 0.4226       |
| 55<br>33<br>2  | DRAM1     | DNA damage regulated autophagy modulator 1                                                      | 6.51589 | 6.56418 | 5.46836 | 3.76189   | 5.67287   | 4.91325 | -2.639271 | -1.40014  | 2.639271  | D<br>o<br>w<br>n | 0.034075273 | 0.40827355   |
| 11             | PRAP1     | Proline-rich acidic                                                                             | 7.      | 6.      | 6.      | 8.        | 9.        | 6.      | 3.3       | 1.7       | 3.3       | U                | 0.0         | 0.4          |

|                |               |                                                         |                      |                     |                     |                     |                     |                     |                          |                             |                             |                  |                             |                             |
|----------------|---------------|---------------------------------------------------------|----------------------|---------------------|---------------------|---------------------|---------------------|---------------------|--------------------------|-----------------------------|-----------------------------|------------------|-----------------------------|-----------------------------|
| 84<br>71       |               | protein 1                                               | 06<br>45<br>2        | 77<br>75<br>7       | 21<br>07<br>6       | 90<br>88<br>1       | 57<br>53<br>8       | 77<br>72<br>7       | 315<br>726<br>02         | 362<br>033<br>33            | 31<br>57<br>26<br>02        | p                | 41<br>23<br>31<br>47        | 26<br>96<br>10<br>48        |
| 22<br>4        | ALDH<br>3A2   | Aldehyde<br>dehydrogenase 3<br>family member A2         | 10<br>.0<br>98<br>78 | 8.<br>99<br>95<br>8 | 9.<br>37<br>99<br>1 | 7.<br>77<br>59<br>1 | 8.<br>47<br>12<br>1 | 6.<br>67<br>78<br>1 | -3.<br>607<br>793<br>254 | -1.<br>851<br>116<br>667    | 3.6<br>07<br>79<br>32<br>54 | D<br>o<br>w<br>n | 0.0<br>07<br>90<br>51<br>05 | 0.2<br>99<br>13<br>95<br>54 |
| 92<br>08<br>6  | GGTL<br>C1    | Γ-glutamyltransfer<br>ase light chain 1                 | 9.<br>16<br>15<br>7  | 9.<br>31<br>31<br>4 | 8.<br>59<br>69<br>8 | 7.<br>48<br>88<br>1 | 7.<br>56<br>93<br>1 | 5.<br>95<br>58<br>1 | -4.<br>053<br>739<br>364 | -2.<br>019<br>253<br>333    | 4.0<br>53<br>73<br>93<br>64 | D<br>o<br>w<br>n | 0.0<br>03<br>67<br>15<br>27 | 0.2<br>38<br>59<br>85<br>3  |
| 89<br>70       | HIST1<br>H2BJ | Histone cluster 1,<br>h2bj                              | 5.<br>29<br>89<br>9  | 4.<br>46<br>46<br>2 | 4.<br>76<br>98<br>1 | 5.<br>23<br>29<br>1 | 6.<br>95<br>67<br>4 | 5.<br>79<br>47<br>6 | 2.2<br>196<br>466<br>05  | 1.1<br>503<br>3<br>66<br>05 | 2.2<br>19<br>64<br>66<br>05 | U<br>p           | 0.0<br>41<br>99<br>51<br>27 | 0.4<br>30<br>07<br>43<br>46 |
| 91<br>41       | PDCD<br>5     | Programmed cell<br>death 5                              | 5.<br>46<br>34<br>7  | 5.<br>03<br>57<br>9 | 5.<br>27<br>08<br>7 | 6.<br>20<br>47<br>5 | 6.<br>58<br>47<br>1 | 6.<br>04<br>47<br>1 | 2.0<br>298<br>080<br>9   | 1.0<br>213<br>433<br>33     | 2.0<br>29<br>80<br>80<br>9  | U<br>p           | 0.0<br>03<br>54<br>83<br>7  | 0.2<br>37<br>14<br>66<br>6  |
| 14<br>71<br>11 | NOTU<br>M     | Notum<br>pectinacylesteras<br>e homolog<br>(Drosophila) | 5.<br>32<br>59       | 11<br>.6<br>50<br>8 | 10<br>.5<br>10<br>7 | 5.<br>42<br>99<br>5 | 4.<br>94<br>97<br>6 | 5.<br>35<br>47<br>3 | -15<br>.11<br>232<br>086 | -3.<br>917<br>653<br>333    | 15.<br>11<br>23<br>20<br>86 | D<br>o<br>w<br>n | 0.0<br>34<br>63<br>79<br>56 | 0.4<br>08<br>42<br>39<br>81 |
| 71<br>63       | TPD52         | Tumor protein<br>D52                                    | 6.<br>39<br>73<br>8  | 6.<br>57<br>03<br>2 | 7.<br>37<br>05<br>1 | 9.<br>25<br>86<br>3 | 9.<br>52<br>07<br>4 | 7.<br>81<br>22<br>6 | 4.2<br>412<br>024<br>33  | 2.0<br>844<br>733<br>33     | 4.2<br>41<br>20<br>24       | U<br>p           | 0.0<br>04<br>25<br>54<br>85 | 0.2<br>46<br>47<br>32<br>18 |
| 50<br>65<br>0  | ARHG<br>EF3   | Rho guanine<br>nucleotide<br>exchange factor 3          | 6.<br>51<br>87<br>9  | 7.<br>49<br>64<br>4 | 7.<br>67<br>40<br>8 | 4.<br>78<br>94<br>5 | 5.<br>11<br>33<br>1 | 5.<br>58<br>39<br>2 | -4.<br>191<br>722<br>856 | -2.<br>067<br>543<br>333    | 4.1<br>91<br>72<br>28<br>56 | D<br>o<br>w<br>n | 0.0<br>00<br>88<br>48<br>69 | 0.1<br>81<br>04<br>09<br>24 |
| 23<br>71<br>0  | GABA<br>RAPL1 | GABA(A)<br>receptor-associate<br>d protein like 1       | 10<br>.1<br>18<br>69 | 9.<br>03<br>81<br>7 | 8.<br>66<br>99<br>5 | 7.<br>84<br>58<br>5 | 8.<br>03<br>14<br>9 | 7.<br>53<br>35<br>6 | -2.<br>773<br>972<br>207 | -1.<br>471<br>953<br>333    | 2.7<br>73<br>97<br>22<br>07 | D<br>o<br>w<br>n | 0.0<br>07<br>50<br>57<br>38 | 0.2<br>94<br>41<br>93<br>61 |



|                |             |                                                           |                  |                 |                 |                 |                 |                 |                      |                      |                         |                  |                         |                         |
|----------------|-------------|-----------------------------------------------------------|------------------|-----------------|-----------------|-----------------|-----------------|-----------------|----------------------|----------------------|-------------------------|------------------|-------------------------|-------------------------|
| 38<br>87<br>53 | COA6        | Cytochrome c oxidase assembly factor 6                    | 5.98<br>91       | 5.04<br>46<br>3 | 5.51<br>40<br>3 | 7.50<br>75<br>2 | 7.00<br>24<br>7 | 5.93<br>93<br>1 | 2.4631<br>651<br>03  | 1.3005<br>133<br>33  | 2.463<br>16<br>51<br>03 | U<br>p           | 0.022<br>85<br>29<br>1  | 0.379<br>93<br>20<br>65 |
| 57<br>52<br>3  | NYNR<br>IN  | NYN domain and retroviral integrase containing            | 7.13<br>84<br>7  | 7.14<br>67<br>9 | 8.35<br>78<br>4 | 5.82<br>82<br>1 | 7.01<br>83      | 6.09<br>46<br>2 | -2.352<br>166<br>197 | -1.233<br>99         | 2.352<br>16<br>61<br>97 | D<br>o<br>w<br>n | 0.029<br>51<br>96<br>56 | 0.396<br>72<br>89<br>24 |
| 89<br>82<br>2  | KCNK<br>17  | Potassium channel, two pore domain subfamily K, member 17 | 5.40<br>83<br>6  | 7.17<br>69<br>6 | 7.68<br>19<br>9 | 4.83<br>45<br>5 | 4.30<br>16<br>1 | 4.90<br>51<br>7 | -4.214<br>398<br>294 | -2.075<br>326<br>667 | 4.214<br>39<br>82<br>94 | D<br>o<br>w<br>n | 0.008<br>56<br>04<br>64 | 0.307<br>29<br>63<br>95 |
| 11<br>62<br>38 | TLCD<br>1   | TLC domain containing 1                                   | 5.31<br>09<br>6  | 5.06<br>58<br>4 | 5.51<br>10<br>7 | 6.67<br>51<br>4 | 6.46<br>81      | 6.07<br>38<br>2 | 2.1580<br>525<br>56  | 1.1097<br>3          | 2.158<br>05<br>25<br>56 | U<br>p           | 0.002<br>76<br>62<br>59 | 0.228<br>79<br>54<br>43 |
| 51<br>71<br>6  | CES1P<br>1  | Carboxylesterase 1 pseudogene 1                           | 12.5<br>86<br>02 | 7.96<br>52<br>6 | 9.64<br>43      | 5.60<br>04<br>1 | 7.40<br>13<br>3 | 5.87<br>52<br>7 | -13.66<br>919<br>774 | -3.772<br>856<br>667 | 13.66<br>91<br>97<br>74 | D<br>o<br>w<br>n | 0.012<br>42<br>41<br>69 | 0.334<br>46<br>67<br>31 |
| 40<br>13       | VWA5<br>A   | Von Willebrand factor A domain containing 5A              | 7.49<br>18<br>1  | 6.81<br>63<br>1 | 7.37<br>13<br>2 | 4.57<br>11<br>3 | 6.23<br>58      | 6.78<br>61<br>2 | -2.570<br>644<br>303 | -1.362<br>13         | 2.570<br>64<br>43<br>03 | D<br>o<br>w<br>n | 0.045<br>89<br>32<br>12 | 0.439<br>13<br>53<br>61 |
| 64<br>41<br>8  | TMEM<br>168 | Transmembrane protein 168                                 | 4.18<br>69<br>6  | 4.90<br>98<br>6 | 4.79<br>18<br>7 | 5.09<br>99<br>1 | 5.60<br>57<br>6 | 6.34<br>63<br>8 | 2.0769<br>310<br>66  | 1.0544<br>533<br>33  | 2.076<br>93<br>10<br>66 | U<br>p           | 0.023<br>78<br>69<br>79 | 0.381<br>26<br>89<br>97 |
| 64<br>51       | SH3B<br>GRL | SH3 domain binding glutamate-rich protein like            | 7.14<br>65<br>2  | 6.87<br>04<br>8 | 6.59<br>62<br>5 | 7.07<br>79<br>7 | 8.51<br>28<br>5 | 8.04<br>76<br>8 | 2.0117<br>020<br>79  | 1.0084<br>166<br>67  | 2.011<br>70<br>20<br>79 | U<br>p           | 0.036<br>48<br>56<br>1  | 0.414<br>09<br>00<br>13 |
| 65<br>65       | SLC15<br>A2 | Solute carrier family 15 (oligopeptide transporter),      | 7.39<br>51<br>3  | 7.20<br>26<br>5 | 7.01<br>71<br>5 | 4.88<br>82<br>8 | 5.03<br>04<br>3 | 6.12<br>99<br>1 | -3.618<br>612<br>605 | -1.855<br>436<br>667 | 3.618<br>61<br>26       | D<br>o<br>w<br>n | 0.001<br>34<br>81       | 0.187<br>10<br>78       |

|                |            |                                                         |                     |                     |                     |                     |                      |                     |                          |                          |                             |                  |                             |                             |    |
|----------------|------------|---------------------------------------------------------|---------------------|---------------------|---------------------|---------------------|----------------------|---------------------|--------------------------|--------------------------|-----------------------------|------------------|-----------------------------|-----------------------------|----|
|                |            | member 2                                                |                     |                     |                     |                     |                      |                     |                          |                          |                             | 05               |                             | 67                          | 18 |
| 84<br>52<br>7  | ZNF55<br>9 | Zinc finger protein<br>559                              | 5.<br>41<br>43<br>1 | 5.<br>60<br>37      | 5.<br>57<br>95<br>6 | 2.<br>78<br>44<br>5 | 3.<br>78<br>11<br>1  | 4.<br>36<br>03<br>7 | -3.<br>707<br>756<br>926 | -1.<br>890<br>546<br>667 | 3.7<br>07<br>75<br>69<br>26 | D<br>o<br>w<br>n | 0.0<br>01<br>83<br>36<br>41 | 0.1<br>93<br>61<br>76<br>74 |    |
| 19<br>33       | EEF1B<br>2 | Eukaryotic<br>translation<br>elongation factor 1<br>β 2 | 8.<br>52<br>74<br>4 | 8.<br>65<br>52<br>5 | 8.<br>96<br>32<br>8 | 10<br>.7<br>19<br>7 | 10<br>.2<br>70<br>42 | 8.<br>78<br>65<br>8 | 2.3<br>137<br>665<br>88  | 1.2<br>102<br>433<br>33  | 2.3<br>13<br>76<br>65<br>88 | U<br>p           | 0.0<br>43<br>42<br>63<br>13 | 0.4<br>32<br>33<br>09<br>01 |    |
| 54<br>43<br>2  | YIPF1      | Yip1 domain<br>family member 1                          | 7.<br>22<br>91<br>1 | 7.<br>97<br>26<br>8 | 7.<br>65<br>82<br>3 | 5.<br>94<br>94      | 6.<br>62<br>00<br>5  | 6.<br>30<br>00<br>5 | -2.<br>514<br>328<br>816 | -1.<br>330<br>173<br>333 | 2.5<br>14<br>32<br>88<br>16 | D<br>o<br>w<br>n | 0.0<br>02<br>47<br>21<br>06 | 0.2<br>17<br>69<br>67<br>67 |    |
| 66<br>7        | DST        | Dystonin                                                | 4.<br>42<br>26<br>2 | 3.<br>31<br>77<br>7 | 3.<br>43<br>92<br>2 | 6.<br>83<br>01<br>1 | 6.<br>19<br>30<br>3  | 5.<br>64<br>21<br>8 | 5.6<br>382<br>078<br>64  | 2.4<br>952<br>366<br>67  | 5.6<br>38<br>20<br>78<br>64 | U<br>p           | 0.0<br>00<br>50<br>42<br>25 | 0.1<br>64<br>24<br>82<br>94 |    |
| 22<br>73       | FHL1       | Four and a half<br>LIM domains 1                        | 5.<br>85<br>85<br>8 | 5.<br>25<br>90<br>1 | 5.<br>03<br>28<br>1 | 5.<br>42<br>99<br>1 | 8.<br>27<br>25<br>6  | 7.<br>36<br>69      | 3.1<br>159<br>167<br>03  | 1.6<br>396<br>566<br>67  | 3.1<br>15<br>91<br>67<br>03 | U<br>p           | 0.0<br>49<br>13<br>25<br>69 | 0.4<br>46<br>17<br>48       |    |
| 25<br>39<br>82 | ASPH<br>D1 | Aspartate<br>β-hydroxylase<br>domain containing<br>1    | 7.<br>93<br>88<br>7 | 7.<br>61<br>14<br>3 | 7.<br>61<br>69<br>7 | 7.<br>19<br>74<br>1 | 5.<br>24<br>26<br>6  | 6.<br>86<br>23      | -2.<br>442<br>400<br>856 | -1.<br>288<br>3          | 2.4<br>42<br>40<br>08<br>56 | D<br>o<br>w<br>n | 0.0<br>37<br>31<br>95<br>16 | 0.4<br>16<br>34<br>38<br>48 |    |
| 52<br>13       | PFKM       | Phosphofructokina<br>se, muscle                         | 5.<br>73<br>86<br>9 | 7.<br>88<br>31      | 7.<br>28<br>90<br>4 | 4.<br>56<br>13<br>9 | 4.<br>86<br>09<br>4  | 5.<br>16<br>57<br>8 | -4.<br>309<br>657<br>841 | -2.<br>107<br>573<br>333 | 4.3<br>09<br>65<br>78<br>41 | D<br>o<br>w<br>n | 0.0<br>05<br>71<br>14<br>38 | 0.2<br>74<br>12<br>79<br>94 |    |
| 39<br>14       | LAMB<br>3  | Laminin subunit β<br>3                                  | 5.<br>10<br>28<br>2 | 5.<br>71<br>96<br>5 | 5.<br>68<br>24<br>3 | 7.<br>33<br>99<br>4 | 6.<br>89<br>68       | 7.<br>82<br>73<br>3 | 3.6<br>126<br>479<br>37  | 1.8<br>530<br>566<br>67  | 3.6<br>12<br>64<br>79<br>37 | U<br>p           | 0.0<br>00<br>61<br>83<br>6  | 0.1<br>68<br>94<br>20<br>05 |    |
| 90<br>71       | CLDN<br>10 | Claudin 10                                              | 7.<br>87<br>28      | 7.<br>86<br>82      | 7.<br>79<br>79      | 5.<br>40<br>9       | 5.<br>58<br>08       | 6.<br>35<br>63      | -4.<br>182<br>252        | -2.<br>064<br>28         | 4.1<br>82<br>25             | D<br>o<br>w      | 0.0<br>00<br>19             | 0.1<br>35<br>27             |    |

|                |              |                                                                  |                     |                     |                      |                      |                      |                     |                          |                          |                             |                  |                             |                             |
|----------------|--------------|------------------------------------------------------------------|---------------------|---------------------|----------------------|----------------------|----------------------|---------------------|--------------------------|--------------------------|-----------------------------|------------------|-----------------------------|-----------------------------|
|                |              |                                                                  |                     | 7                   | 7                    |                      | 6                    | 4                   | 019                      |                          | 20                          | n                | 51                          | 95                          |
|                |              |                                                                  |                     |                     |                      |                      |                      |                     |                          |                          | 19                          |                  | 61                          | 77                          |
| 64<br>79<br>8  | DEPT<br>OR   | DEP domain<br>containing<br>MTOR-interacting<br>protein          | 2.<br>72<br>28<br>3 | 4.<br>34<br>88<br>5 | 4.<br>58<br>43<br>7  | 5.<br>86<br>24<br>9  | 5.<br>57<br>83<br>9  | 4.<br>45<br>70<br>3 | 2.6<br>646<br>634<br>55  | 1.4<br>139<br>533<br>33  | 2.6<br>64<br>66<br>34<br>55 | U<br>p           | 0.0<br>43<br>56<br>89<br>68 | 0.4<br>32<br>33<br>09<br>01 |
| 32<br>48       | HPGD         | Hydroxyprostagla<br>ndin<br>dehydrogenase<br>15-(NAD)            | 4.<br>68<br>73      | 3.<br>35<br>37<br>2 | 4.<br>25<br>97<br>9  | 7.<br>36<br>08<br>5  | 7.<br>45<br>47<br>9  | 5.<br>03<br>22<br>1 | 5.7<br>186<br>713<br>63  | 2.5<br>156<br>8          | 5.7<br>18<br>67<br>13<br>63 | U<br>p           | 0.0<br>08<br>60<br>80<br>65 | 0.3<br>07<br>29<br>63<br>95 |
| 33<br>39<br>32 | HIST2<br>H3A | Histone cluster 2,<br>h3a                                        | 6.<br>19<br>18<br>1 | 5.<br>50<br>18<br>7 | 5.<br>70<br>53<br>8  | 7.<br>08<br>31<br>2  | 7.<br>49<br>99<br>7  | 6.<br>87<br>60<br>8 | 2.5<br>550<br>827<br>22  | 1.3<br>533<br>7          | 2.5<br>55<br>08<br>27<br>22 | U<br>p           | 0.0<br>01<br>87<br>90<br>27 | 0.1<br>95<br>76<br>45<br>58 |
| 54<br>84<br>7  | SIDT1        | SID1<br>transmembrane<br>family member 1                         | 6.<br>44<br>81<br>6 | 6.<br>41<br>30<br>8 | 7.<br>41<br>39<br>4  | 6.<br>14<br>15<br>8  | 5.<br>38<br>62<br>5  | 5.<br>36<br>75<br>7 | -2.<br>183<br>425<br>541 | -1.<br>126<br>593<br>333 | 2.1<br>83<br>42<br>55<br>41 | D<br>o<br>w<br>n | 0.0<br>17<br>79<br>31<br>14 | 0.3<br>61<br>50<br>23<br>21 |
| 10<br>15       | CDH1<br>7    | Cadherin 17, LI<br>cadherin<br>(liver-intestine)                 | 4.<br>75<br>86<br>4 | 6.<br>01<br>14<br>8 | 7.<br>41<br>61<br>8  | 10<br>.3<br>35<br>51 | 11<br>.0<br>02<br>37 | 8.<br>88<br>83<br>2 | 16.<br>148<br>183<br>71  | 4.0<br>133               | 16.<br>14<br>81<br>83<br>71 | U<br>p           | 0.0<br>01<br>31<br>49<br>2  | 0.1<br>87<br>10<br>78<br>18 |
| 57<br>44<br>7  | NDRG<br>2    | NDRG family<br>member 2                                          | 8.<br>53<br>64<br>1 | 9.<br>49<br>66<br>2 | 10<br>.1<br>28<br>39 | 8.<br>65<br>48<br>6  | 7.<br>67<br>07<br>2  | 7.<br>70<br>18<br>1 | -2.<br>599<br>096<br>14  | -1.<br>378               | 2.5<br>99<br>09<br>61<br>4  | D<br>o<br>w<br>n | 0.0<br>21<br>68<br>76<br>04 | 0.3<br>76<br>41<br>62<br>63 |
| 72<br>73       | TTN          | Titin                                                            | 7.<br>85<br>24<br>4 | 4.<br>83<br>60<br>4 | 5.<br>83<br>12<br>6  | 4.<br>62<br>21<br>4  | 4.<br>06<br>43<br>9  | 3.<br>64<br>99<br>3 | -4.<br>173<br>024<br>334 | -2.<br>061<br>093<br>333 | 4.1<br>73<br>02<br>43<br>34 | D<br>o<br>w<br>n | 0.0<br>25<br>56<br>43<br>37 | 0.3<br>84<br>73<br>53<br>87 |
| 55<br>30<br>4  | SPTLC<br>3   | Serine<br>palmitoyltransfera<br>se, long chain base<br>subunit 3 | 7.<br>98<br>13<br>4 | 6.<br>43<br>73<br>7 | 7.<br>51<br>96<br>7  | 5.<br>98<br>55<br>8  | 6.<br>43<br>57<br>8  | 5.<br>97<br>98<br>3 | -2.<br>264<br>297<br>203 | -1.<br>179<br>063<br>333 | 2.2<br>64<br>29<br>72<br>03 | D<br>o<br>w<br>n | 0.0<br>24<br>03<br>91<br>04 | 0.3<br>81<br>89<br>69<br>49 |
| 80<br>70       | SLC19<br>A3  | Solute carrier<br>family 19                                      | 4.<br>47            | 7.<br>26            | 7.<br>36             | 2.<br>87             | 3.<br>35             | 4.<br>31            | -7.<br>214               | -2.<br>850               | 7.2<br>14                   | D<br>o           | 0.0<br>09                   | 0.3<br>13                   |

|                           |                      |                                  |                      |                      |                      |                      |                     |                     |                          |                          |                             |                  |                             |                             |
|---------------------------|----------------------|----------------------------------|----------------------|----------------------|----------------------|----------------------|---------------------|---------------------|--------------------------|--------------------------|-----------------------------|------------------|-----------------------------|-----------------------------|
| 4                         |                      | (thiamine transporter), member 3 | 41<br>5              | 28                   | 17<br>7              | 54                   | 09<br>8             | 96<br>9             | 419<br>594               | 883<br>333               | 41<br>95<br>94              | w<br>n           | 64<br>12<br>71              | 66<br>02<br>93              |
| 72<br>98                  | TYMS                 | Thymidylate synthetase           | 6.<br>18<br>65<br>4  | 5.<br>67<br>18<br>4  | 6.<br>12<br>52<br>6  | 7.<br>03<br>88<br>6  | 7.<br>81<br>32<br>3 | 7.<br>90<br>10<br>3 | 3.0<br>101<br>318<br>19  | 1.5<br>898<br>266<br>67  | 3.0<br>10<br>13<br>18<br>19 | U<br>p           | 0.0<br>01<br>25<br>96<br>19 | 0.1<br>87<br>10<br>78<br>18 |
| 26<br>24<br>9             | KLHL<br>3            | Kelch like family member 3       | 7.<br>40<br>66<br>2  | 5.<br>76<br>58<br>4  | 6.<br>42<br>89<br>9  | 5.<br>48<br>98<br>3  | 4.<br>39<br>84<br>3 | 5.<br>64<br>79<br>7 | -2.<br>558<br>101<br>19  | -1.<br>355<br>073<br>333 | 2.5<br>58<br>10<br>11<br>9  | D<br>o<br>w<br>n | 0.0<br>31<br>10<br>03<br>84 | 0.3<br>99<br>91<br>77<br>84 |
| 56<br>70<br>4             | JPH1                 | Junctophilin 1                   | 3.<br>72<br>87<br>7  | 4.<br>54<br>74<br>3  | 4.<br>67<br>08<br>1  | 6.<br>31<br>86<br>8  | 5.<br>27<br>17<br>2 | 5.<br>06<br>45<br>5 | 2.3<br>554<br>129<br>26  | 1.2<br>359<br>8          | 2.3<br>55<br>41<br>29<br>26 | U<br>p           | 0.0<br>19<br>04<br>19<br>6  | 0.3<br>67<br>48<br>02<br>31 |
| 57<br>22<br>4             | NHSL<br>1            | NHS like 1                       | 4.<br>99<br>35       | 5.<br>45<br>58<br>3  | 5.<br>83<br>43<br>1  | 7.<br>10<br>11<br>6  | 7.<br>10<br>03<br>2 | 5.<br>81<br>80<br>2 | 2.3<br>706<br>565<br>5   | 1.2<br>452<br>866<br>67  | 2.3<br>70<br>65<br>65<br>5  | U<br>p           | 0.0<br>20<br>26<br>80<br>92 | 0.3<br>71<br>13<br>26<br>99 |
| 10<br>01<br>33<br>94<br>1 | CD24                 | CD24 molecule                    | 12.<br>0<br>76<br>91 | 10.<br>3<br>63<br>66 | 11.<br>2<br>61<br>96 | 10.<br>0<br>63<br>08 | 7.<br>93<br>43<br>2 | 8.<br>64<br>15<br>2 | -5.<br>114<br>299<br>562 | -2.<br>354<br>536<br>667 | 5.1<br>14<br>29<br>95<br>62 | D<br>o<br>w<br>n | 0.0<br>07<br>62<br>21<br>39 | 0.2<br>96<br>60<br>29<br>56 |
| 10<br>05<br>08<br>22<br>6 | LOC10<br>050822<br>6 | HHSL751                          | 6.<br>01<br>29<br>9  | 6.<br>15<br>19<br>1  | 6.<br>19<br>75<br>4  | 5.<br>44<br>39<br>4  | 4.<br>42<br>10<br>8 | 4.<br>56<br>23<br>8 | -2.<br>482<br>304<br>329 | -1.<br>311<br>68         | 2.4<br>82<br>30<br>43<br>29 | D<br>o<br>w<br>n | 0.0<br>03<br>51<br>83<br>93 | 0.2<br>37<br>14<br>66<br>6  |
| 79<br>86<br>6             | BORA                 | Bora, aurora kinase A activator  | 5.<br>18<br>87<br>4  | 4.<br>69<br>67<br>3  | 4.<br>68<br>79<br>6  | 5.<br>85<br>04<br>2  | 6.<br>95<br>53<br>1 | 6.<br>25<br>89<br>1 | 2.8<br>226<br>821<br>19  | 1.4<br>970<br>666<br>67  | 2.8<br>22<br>68<br>21<br>19 | U<br>p           | 0.0<br>02<br>64<br>53       | 0.2<br>25<br>16<br>16<br>96 |
| 99<br>6                   | CDC27                | Cell division cycle 27           | 6.<br>48<br>45<br>1  | 6.<br>09<br>74<br>9  | 6.<br>37<br>60<br>1  | 7.<br>13<br>64<br>5  | 7.<br>80<br>02<br>7 | 7.<br>24<br>93<br>7 | 2.1<br>082<br>218<br>14  | 1.0<br>760<br>266<br>67  | 2.1<br>08<br>22<br>18<br>14 | U<br>p           | 0.0<br>04<br>20<br>23<br>93 | 0.2<br>45<br>36<br>29<br>85 |
| 30                        | HELL                 | Helicase,                        | 3.                   | 3.                   | 3.                   | 6.                   | 7.                  | 5.                  | 5.7                      | 2.5                      | 5.7                         | U                | 0.0                         | 0.1                         |

|                |               |                                                          |                     |                      |                      |                     |                     |                     |                          |                          |                             |                  |                             |                             |
|----------------|---------------|----------------------------------------------------------|---------------------|----------------------|----------------------|---------------------|---------------------|---------------------|--------------------------|--------------------------|-----------------------------|------------------|-----------------------------|-----------------------------|
| 70             | S             | lymphoid-specific                                        | 92<br>46<br>9       | 58<br>10<br>2        | 96<br>73<br>9        | 21<br>51            | 02<br>32<br>7       | 77<br>95            | 156<br>728<br>13         | 149<br>233<br>33         | 15<br>67<br>28<br>13        | p                | 00<br>15<br>05<br>14        | 28<br>62<br>18<br>94        |
| 77<br>84       | ZP3           | Zona pellucida glycoprotein 3 (sperm receptor)           | 4.<br>14<br>45      | 3.<br>65<br>73<br>9  | 4.<br>18<br>01<br>7  | 5.<br>97<br>10<br>7 | 5.<br>17<br>65<br>3 | 4.<br>76<br>18<br>7 | 2.4<br>779<br>321<br>19  | 1.3<br>091<br>366<br>67  | 2.4<br>77<br>93<br>21<br>19 | U<br>p           | 0.0<br>06<br>31<br>95<br>57 | 0.2<br>83<br>73<br>24<br>96 |
| 42<br>33       | MET           | MET proto-oncogene, receptor tyrosine kinase             | 7.<br>90<br>99<br>2 | 6.<br>64<br>85<br>3  | 7.<br>33<br>12<br>7  | 8.<br>43<br>91<br>9 | 8.<br>77<br>02      | 9.<br>03<br>83<br>1 | 2.7<br>371<br>224<br>92  | 1.4<br>526<br>6          | 2.7<br>37<br>12<br>24<br>92 | U<br>p           | 0.0<br>04<br>97<br>02<br>3  | 0.2<br>63<br>83<br>41<br>07 |
| 55<br>35<br>1  | STK32<br>B    | Serine/threonine kinase 32B                              | 6.<br>19<br>90<br>6 | 8.<br>98<br>87<br>7  | 7.<br>89<br>40<br>7  | 3.<br>97<br>97      | 4.<br>77<br>51<br>9 | 4.<br>69<br>20<br>5 | -9.<br>264<br>116<br>098 | -3.<br>211<br>653<br>333 | 9.2<br>64<br>11<br>60<br>98 | D<br>o<br>w<br>n | 0.0<br>02<br>04<br>93<br>22 | 0.2<br>04<br>15<br>41<br>68 |
| 84<br>41<br>8  | CYST<br>M1    | Cysteine-rich transmembrane module containing 1          | 9.<br>32<br>08<br>9 | 10<br>.2<br>25<br>23 | 10<br>.3<br>14<br>98 | 8.<br>76<br>66<br>3 | 8.<br>41<br>36<br>5 | 9.<br>02<br>51<br>2 | -2.<br>327<br>153<br>971 | -1.<br>218<br>566<br>667 | 2.3<br>27<br>15<br>39<br>71 | D<br>o<br>w<br>n | 0.0<br>08<br>17<br>19<br>13 | 0.3<br>01<br>19<br>66<br>52 |
| 49<br>3        | ATP2B<br>4    | Atpase, Ca <sup>++</sup> transporting, plasma membrane 4 | 5.<br>72<br>02<br>3 | 4.<br>91<br>19<br>2  | 5.<br>22<br>75<br>4  | 5.<br>80<br>92<br>9 | 6.<br>66<br>64<br>7 | 6.<br>60<br>09<br>8 | 2.1<br>028<br>559<br>12  | 1.0<br>723<br>5          | 2.1<br>02<br>85<br>59<br>12 | U<br>p           | 0.0<br>14<br>02<br>84<br>09 | 0.3<br>45<br>57<br>11<br>86 |
| 15<br>38<br>30 | RNF14<br>5    | Ring finger protein 145                                  | 5.<br>97<br>71      | 5.<br>77<br>10<br>1  | 6.<br>42<br>73<br>7  | 6.<br>82<br>31<br>2 | 7.<br>13<br>58      | 7.<br>89<br>80<br>3 | 2.3<br>410<br>514<br>91  | 1.2<br>271<br>566<br>67  | 2.3<br>41<br>05<br>14<br>91 | U<br>p           | 0.0<br>08<br>58<br>26<br>88 | 0.3<br>07<br>29<br>63<br>95 |
| 15<br>84<br>71 | PRUN<br>E2    | Prune homolog 2 (Drosophila)                             | 5.<br>66<br>35<br>7 | 3.<br>18<br>29<br>7  | 3.<br>20<br>17       | 4.<br>73<br>55      | 7.<br>15<br>47<br>4 | 7.<br>79<br>24<br>4 | 5.8<br>353<br>263<br>1   | 2.5<br>448<br>133<br>33  | 5.8<br>35<br>32<br>63<br>1  | U<br>p           | 0.0<br>33<br>21<br>64<br>97 | 0.4<br>06<br>85<br>22<br>16 |
| 14<br>68<br>80 | LOC14<br>6880 | Rho gtpase activating protein 27 pseudogene              | 6.<br>28<br>76<br>3 | 5.<br>64<br>95<br>5  | 6.<br>57<br>03<br>2  | 7.<br>70<br>07<br>1 | 6.<br>81<br>67<br>2 | 8.<br>66<br>05<br>8 | 2.9<br>420<br>803<br>88  | 1.5<br>568<br>366<br>67  | 2.9<br>42<br>08<br>03<br>88 | U<br>p           | 0.0<br>15<br>83<br>26<br>02 | 0.3<br>51<br>16<br>74<br>61 |

|                |            |                                                              |                     |                       |                       |                       |                     |                      |                           |                         |                             |                  |                             |                             |
|----------------|------------|--------------------------------------------------------------|---------------------|-----------------------|-----------------------|-----------------------|---------------------|----------------------|---------------------------|-------------------------|-----------------------------|------------------|-----------------------------|-----------------------------|
| 38<br>83<br>36 | SHISA<br>6 | Shisa family<br>member 6                                     | 5.<br>24<br>62<br>5 | 8.<br>98<br>87<br>7   | 7.<br>73<br>35<br>8   | 4.<br>73<br>89<br>4   | 4.<br>13<br>47<br>7 | 5.<br>07<br>39<br>1  | -6.<br>380<br>458<br>058  | -2.<br>673<br>66        | 6.3<br>80<br>45<br>80<br>58 | D<br>o<br>w<br>n | 0.0<br>19<br>12<br>18<br>81 | 0.3<br>67<br>65<br>39<br>22 |
| 16<br>70       | DEFA5      | Defensin $\alpha$ 5                                          | 5.<br>19<br>19      | 11.<br>.4<br>39<br>67 | 11.<br>.5<br>66<br>41 | 4.<br>89<br>23<br>2   | 3.<br>97<br>91<br>8 | 4.<br>52<br>25       | -30.<br>.58<br>304<br>181 | -4.<br>934<br>66        | 30.<br>58<br>30<br>41<br>81 | D<br>o<br>w<br>n | 0.0<br>18<br>99<br>32<br>28 | 0.3<br>67<br>34<br>80<br>71 |
| 22<br>82<br>2  | PHLD<br>A1 | Pleckstrin<br>homology-like<br>domain, family A,<br>member 1 | 6.<br>67<br>02      | 8.<br>38<br>20<br>9   | 8.<br>32<br>90<br>1   | 5.<br>33<br>85        | 7.<br>22<br>72<br>7 | 5.<br>73<br>90<br>2  | -3.<br>231<br>423<br>863  | -1.<br>692<br>17        | 3.2<br>31<br>42<br>38<br>63 | D<br>o<br>w<br>n | 0.0<br>33<br>12<br>74<br>62 | 0.4<br>06<br>36<br>00<br>72 |
| 94<br>55       | HOME<br>R2 | Homer scaffolding<br>protein 2                               | 9.<br>37<br>21<br>6 | 9.<br>30<br>08<br>2   | 9.<br>00<br>02<br>6   | 7.<br>30<br>47        | 6.<br>15<br>62<br>2 | 8.<br>80<br>03<br>8  | -3.<br>491<br>821<br>957  | -1.<br>803<br>98        | 3.4<br>91<br>82<br>19<br>57 | D<br>o<br>w<br>n | 0.0<br>22<br>41<br>77<br>26 | 0.3<br>78<br>66<br>05<br>33 |
| 44<br>19<br>51 | ZFAS1      | ZNFX1 antisense<br>RNA 1                                     | 8.<br>82<br>86<br>2 | 8.<br>16<br>49        | 8.<br>59<br>28        | 10.<br>.1<br>72<br>64 | 9.<br>32<br>98<br>2 | 9.<br>15<br>03<br>1  | 2.0<br>309<br>433<br>52   | 1.0<br>221<br>5         | 2.0<br>30<br>94<br>33<br>52 | U<br>p           | 0.0<br>19<br>25<br>85<br>78 | 0.3<br>67<br>66<br>41<br>57 |
| 55<br>21<br>5  | FANCI      | Fanconi anemia<br>complementation<br>group I                 | 4.<br>59<br>16<br>7 | 4.<br>36<br>90<br>9   | 4.<br>42<br>91<br>7   | 5.<br>97<br>78<br>8   | 6.<br>14<br>35<br>8 | 6.<br>10<br>66<br>1  | 3.0<br>582<br>648<br>11   | 1.6<br>127<br>133<br>33 | 3.0<br>58<br>26<br>48<br>11 | U<br>p           | 5.3<br>66<br>62<br>E-<br>05 | 0.1<br>04<br>83<br>42<br>9  |
| 13<br>65       | CLDN<br>3  | Claudin 3                                                    | 8.<br>66<br>37<br>5 | 7.<br>46<br>37<br>7   | 7.<br>87<br>07<br>2   | 8.<br>72<br>87<br>9   | 9.<br>72<br>96<br>6 | 10.<br>.0<br>81<br>5 | 2.8<br>558<br>166<br>01   | 1.5<br>139<br>033<br>33 | 2.8<br>55<br>81<br>66<br>01 | U<br>p           | 0.0<br>11<br>97<br>96<br>4  | 0.3<br>31<br>43<br>90<br>01 |
| 72             | ACTG<br>2  | Actin, $\gamma$ 2, smooth<br>muscle, enteric                 | 5.<br>45<br>34<br>6 | 4.<br>78<br>78<br>4   | 4.<br>92<br>65        | 5.<br>40<br>73        | 8.<br>25<br>86<br>5 | 7.<br>33<br>55<br>1  | 3.8<br>491<br>858<br>58   | 1.9<br>445<br>533<br>33 | 3.8<br>49<br>18<br>58<br>58 | U<br>p           | 0.0<br>24<br>77<br>36<br>82 | 0.3<br>83<br>13<br>18<br>63 |
| 30<br>84       | NRG1       | Neuregulin 1                                                 | 7.<br>05<br>38<br>1 | 7.<br>16<br>15<br>1   | 6.<br>84<br>54<br>6   | 4.<br>98<br>19<br>4   | 5.<br>74<br>22<br>5 | 6.<br>18<br>48<br>3  | -2.<br>609<br>765<br>175  | -1.<br>383<br>92        | 2.6<br>09<br>76<br>51       | D<br>o<br>w<br>n | 0.0<br>04<br>24<br>59       | 0.2<br>46<br>47<br>32       |

|                           |               |                                                                                                  |                      |                     |                     |                     |                      |                     |                          |                          |                             |                  |                             |                             |    |
|---------------------------|---------------|--------------------------------------------------------------------------------------------------|----------------------|---------------------|---------------------|---------------------|----------------------|---------------------|--------------------------|--------------------------|-----------------------------|------------------|-----------------------------|-----------------------------|----|
|                           |               |                                                                                                  |                      |                     |                     |                     |                      |                     |                          |                          |                             | 75               |                             | 89                          | 18 |
| 51<br>19<br>6             | PLCE1         | Phospholipase C<br>epsilon 1                                                                     | 5.<br>05<br>07<br>3  | 6.<br>07<br>44<br>7 | 4.<br>38<br>57      | 7.<br>59<br>64<br>5 | 7.<br>51<br>48<br>9  | 7.<br>48<br>40<br>6 | 5.1<br>390<br>439<br>84  | 2.3<br>615               | 5.1<br>39<br>04<br>39<br>84 | U<br>p           | 0.0<br>00<br>78<br>62<br>02 | 0.1<br>77<br>73<br>29<br>45 |    |
| 67<br>90                  | AURK<br>A     | Aurora kinase A                                                                                  | 4.<br>22<br>84<br>3  | 4.<br>39<br>75<br>6 | 4.<br>30<br>84<br>3 | 5.<br>26<br>47<br>5 | 5.<br>97<br>38<br>3  | 5.<br>00<br>88<br>8 | 2.1<br>500<br>149<br>13  | 1.1<br>043<br>466<br>67  | 2.1<br>50<br>01<br>49<br>13 | U<br>p           | 0.0<br>05<br>39<br>52<br>36 | 0.2<br>69<br>32<br>15<br>26 |    |
| 30<br>13                  | HIST1<br>H2AD | Histone cluster 1,<br>h2ad                                                                       | 9.<br>22<br>00<br>5  | 8.<br>79<br>40<br>3 | 8.<br>36<br>35<br>4 | 9.<br>99<br>62<br>8 | 10<br>.5<br>65<br>51 | 9.<br>57<br>93<br>7 | 2.3<br>858<br>665<br>22  | 1.2<br>545<br>133<br>33  | 2.3<br>85<br>86<br>65<br>22 | U<br>p           | 0.0<br>08<br>08<br>39<br>68 | 0.2<br>99<br>13<br>95<br>54 |    |
| 31<br>74                  | HNF4<br>G     | Hepatocyte<br>nuclear factor 4, $\gamma$                                                         | 3.<br>91<br>70<br>3  | 2.<br>64<br>12<br>6 | 3.<br>36<br>86<br>7 | 4.<br>97<br>69<br>9 | 4.<br>76<br>23<br>6  | 4.<br>25<br>61      | 2.5<br>600<br>346<br>43  | 1.3<br>561<br>633<br>33  | 2.5<br>60<br>03<br>46<br>43 | U<br>p           | 0.0<br>06<br>74<br>04<br>64 | 0.2<br>88<br>45<br>97<br>19 |    |
| 10<br>03<br>79<br>66<br>1 | GRIK1<br>-AS2 | GRIK1 antisense<br>RNA 2                                                                         | 4.<br>81<br>47<br>2  | 3.<br>57<br>04<br>6 | 3.<br>81<br>18<br>5 | 4.<br>65<br>38<br>8 | 6.<br>10<br>95<br>6  | 5.<br>64<br>22      | 2.6<br>442<br>709<br>27  | 1.4<br>028<br>7          | 2.6<br>44<br>27<br>09<br>27 | U<br>p           | 0.0<br>19<br>79<br>55<br>56 | 0.3<br>68<br>10<br>68<br>92 |    |
| 29<br>69                  | GTF2I         | General<br>transcription factor<br>iii                                                           | 7.<br>83<br>21<br>3  | 8.<br>52<br>85<br>7 | 8.<br>56<br>69<br>7 | 7.<br>38<br>68      | 6.<br>91<br>57       | 7.<br>25<br>45<br>3 | -2.<br>178<br>819<br>474 | -1.<br>123<br>546<br>667 | 2.1<br>78<br>81<br>94<br>74 | D<br>o<br>w<br>n | 0.0<br>05<br>28<br>54<br>87 | 0.2<br>68<br>46<br>24<br>7  |    |
| 65<br>50                  | SLC9A<br>3    | Solute carrier<br>family 9,<br>subfamily A<br>(NHE3, cation<br>proton antiporter<br>3), member 3 | 10<br>.0<br>07<br>39 | 9.<br>90<br>14<br>4 | 11<br>.0<br>10<br>3 | 6.<br>06<br>48<br>2 | 7.<br>41<br>51       | 6.<br>55<br>3       | -12<br>.36<br>968<br>337 | -3.<br>628<br>736<br>667 | 12.<br>36<br>96<br>83<br>37 | D<br>o<br>w<br>n | 8.3<br>14<br>47<br>E-<br>05 | 0.1<br>26<br>50<br>89<br>75 |    |
| 90<br>58<br>9             | ZNF62<br>5    | Zinc finger protein<br>625                                                                       | 7.<br>08<br>67<br>1  | 7.<br>47<br>19<br>2 | 7.<br>41<br>44<br>2 | 4.<br>66<br>41<br>3 | 6.<br>17<br>38<br>7  | 5.<br>85<br>55<br>3 | -3.<br>386<br>605<br>642 | -1.<br>759<br>84         | 3.3<br>86<br>60<br>56<br>42 | D<br>o<br>w<br>n | 0.0<br>03<br>44<br>84<br>71 | 0.2<br>37<br>14<br>66<br>6  |    |
| 10<br>37                  | IRF9          | Interferon<br>regulatory factor 9                                                                | 8.<br>59             | 7.<br>51            | 8.<br>16            | 6.<br>14            | 7.<br>58             | 7.<br>06            | -2.<br>227               | -1.<br>155               | 2.2<br>27                   | D<br>o           | 0.0<br>34                   | 0.4<br>08                   |    |

|                           |                       |                                                              |                      |                      |                      |                     |                      |                     |                          |                          |                             |                  |                             |                             |
|---------------------------|-----------------------|--------------------------------------------------------------|----------------------|----------------------|----------------------|---------------------|----------------------|---------------------|--------------------------|--------------------------|-----------------------------|------------------|-----------------------------|-----------------------------|
| 9                         |                       |                                                              | 49<br>5              | 35<br>5              | 23<br>7              | 88<br>1             | 62<br>2              | 94<br>2             | 573<br>961               | 473<br>333               | 57<br>39<br>61              | w<br>n           | 36<br>50<br>9               | 33<br>62<br>87              |
| 34<br>86                  | IGFBP<br>3            | Insulin like growth<br>factor binding<br>protein 3           | 5.<br>66<br>98<br>1  | 6.<br>30<br>73<br>7  | 6.<br>38<br>42<br>9  | 7.<br>27<br>14<br>4 | 10<br>.1<br>80<br>59 | 8.<br>02<br>62<br>4 | 5.1<br>775<br>395<br>42  | 2.3<br>722<br>666<br>67  | 5.1<br>77<br>53<br>95<br>42 | U<br>p           | 0.0<br>12<br>48<br>51<br>87 | 0.3<br>34<br>46<br>67<br>31 |
| 15<br>16<br>48            | SGOL<br>1             | Shugoshin-like 1<br>(S. Pombe)                               | 4.<br>10<br>59<br>2  | 3.<br>96<br>51<br>7  | 3.<br>83<br>01<br>8  | 4.<br>76<br>99<br>2 | 5.<br>26<br>21<br>1  | 4.<br>94<br>38<br>3 | 2.0<br>347<br>666<br>21  | 1.0<br>248<br>633<br>33  | 2.0<br>34<br>76<br>66<br>21 | U<br>p           | 0.0<br>01<br>44<br>34<br>72 | 0.1<br>87<br>10<br>78<br>18 |
| 56<br>00<br>0             | NXF3                  | Nuclear RNA<br>export factor 3                               | 6.<br>89<br>72       | 8.<br>63<br>07<br>6  | 8.<br>91<br>59<br>7  | 3.<br>80<br>12<br>4 | 4.<br>19<br>94<br>2  | 4.<br>55<br>98<br>5 | -15<br>.57<br>478<br>13  | -3.<br>961<br>14         | 15.<br>57<br>47<br>81<br>3  | D<br>o<br>w<br>n | 0.0<br>00<br>16<br>39<br>86 | 0.1<br>28<br>62<br>18<br>94 |
| 51<br>28<br>0             | GOLM<br>1             | Golgi membrane<br>protein 1                                  | 10<br>.2<br>20<br>66 | 10<br>.8<br>91<br>67 | 11<br>.8<br>78<br>06 | 7.<br>20<br>31<br>3 | 9.<br>29<br>35<br>7  | 9.<br>13<br>87<br>8 | -5.<br>470<br>363<br>367 | -2.<br>451<br>636<br>667 | 5.4<br>70<br>36<br>33<br>67 | D<br>o<br>w<br>n | 0.0<br>07<br>35<br>72<br>09 | 0.2<br>92<br>40<br>97<br>69 |
| 11<br>16<br>3             | NUDT<br>4             | Nudix hydrolase 4                                            | 5.<br>90<br>68<br>7  | 4.<br>50<br>84<br>1  | 5.<br>12<br>77       | 3.<br>52<br>15<br>6 | 4.<br>35<br>53<br>6  | 3.<br>47<br>68<br>2 | -2.<br>632<br>463<br>145 | -1.<br>396<br>413<br>333 | 2.6<br>32<br>46<br>31<br>45 | D<br>o<br>w<br>n | 0.0<br>11<br>24<br>71<br>44 | 0.3<br>24<br>85<br>44<br>65 |
| 80<br>15<br>0             | ASRG<br>L1            | Asparaginase like<br>1                                       | 6.<br>49<br>12<br>7  | 7.<br>81<br>52<br>5  | 7.<br>93<br>19       | 6.<br>47<br>73<br>2 | 5.<br>97<br>37<br>6  | 6.<br>41<br>77<br>4 | -2.<br>178<br>295<br>986 | -1.<br>123<br>2          | 2.1<br>78<br>29<br>59<br>86 | D<br>o<br>w<br>n | 0.0<br>30<br>53<br>02<br>86 | 0.3<br>99<br>30<br>90<br>08 |
| 51<br>02<br>8             | VPS36                 | Vacuolar protein<br>sorting 36<br>homolog (S.<br>Cerevisiae) | 4.<br>42<br>2        | 5.<br>30<br>28<br>1  | 4.<br>84<br>81<br>3  | 5.<br>72<br>02<br>5 | 6.<br>02<br>71<br>7  | 5.<br>89<br>97<br>3 | 2.0<br>345<br>879<br>79  | 1.0<br>247<br>366<br>67  | 2.0<br>34<br>58<br>79<br>79 | U<br>p           | 0.0<br>06<br>74<br>18<br>53 | 0.2<br>88<br>45<br>97<br>19 |
| 10<br>05<br>26<br>83<br>1 | SLX1B<br>-SULT<br>1A4 | SLX1B-SULT1A4<br>readthrough<br>(NMD candidate)              | 6.<br>47<br>72<br>2  | 6.<br>93<br>54<br>7  | 6.<br>66<br>10<br>6  | 7.<br>80<br>23<br>3 | 8.<br>02<br>89<br>9  | 7.<br>66<br>66<br>2 | 2.2<br>059<br>447<br>64  | 1.1<br>413<br>966<br>67  | 2.2<br>05<br>94<br>47<br>64 | U<br>p           | 0.0<br>01<br>52<br>38<br>01 | 0.1<br>87<br>10<br>78<br>18 |
| 76                        | RELL1                 | RELT-like 1                                                  | 7.                   | 8.                   | 8.                   | 6.                  | 7.                   | 6.                  | -2.                      | -1.                      | 2.6                         | D                | 0.0                         | 0.3                         |



|                |              |                                                                     |                     |                     |                     |                     |                     |                     |                          |                          |                             |                  |                             |                             |
|----------------|--------------|---------------------------------------------------------------------|---------------------|---------------------|---------------------|---------------------|---------------------|---------------------|--------------------------|--------------------------|-----------------------------|------------------|-----------------------------|-----------------------------|
| 82<br>11       |              |                                                                     | 91<br>07<br>6       | 80<br>59<br>6       | 24<br>44<br>3       | 24<br>38<br>6       | 53<br>01<br>1       | 92<br>69<br>3       | 676<br>009<br>677        | 420<br>083<br>333        | 76<br>00<br>96<br>77        | o<br>w<br>n      | 08<br>61<br>26<br>99        | 07<br>29<br>63<br>95        |
| 37<br>03       | STT3A        | STT3A, subunit of the oligosaccharyltransferase complex (catalytic) | 8.<br>78<br>9       | 9.<br>53<br>67<br>7 | 8.<br>95<br>06<br>7 | 8.<br>08<br>46<br>1 | 7.<br>99<br>30<br>8 | 7.<br>96<br>40<br>4 | -2.<br>111<br>453<br>78  | -1.<br>078<br>236<br>667 | 2.1<br>11<br>45<br>37<br>8  | D<br>o<br>w<br>n | 0.0<br>04<br>00<br>07<br>6  | 0.2<br>42<br>71<br>06<br>82 |
| 55<br>28<br>89 | ATXN<br>7L3B | Ataxin 7-like 3B                                                    | 8.<br>01<br>91<br>6 | 8.<br>77<br>15<br>6 | 8.<br>51<br>25<br>3 | 7.<br>14<br>87<br>7 | 7.<br>35<br>94<br>8 | 7.<br>63<br>36<br>8 | -2.<br>075<br>952<br>356 | -1.<br>053<br>773<br>333 | 2.0<br>75<br>95<br>23<br>56 | D<br>o<br>w<br>n | 0.0<br>06<br>23<br>54<br>34 | 0.2<br>81<br>63<br>25<br>5  |
| 14<br>38<br>72 | ARHG<br>AP42 | Rho gtpase activating protein 42                                    | 5.<br>36<br>26<br>8 | 4.<br>58<br>82      | 4.<br>98<br>35<br>2 | 5.<br>65<br>27<br>3 | 6.<br>82<br>85<br>6 | 5.<br>69<br>20<br>1 | 2.1<br>134<br>988<br>59  | 1.0<br>796<br>333<br>33  | 2.1<br>13<br>49<br>88<br>59 | U<br>p           | 0.0<br>25<br>75<br>93<br>94 | 0.3<br>85<br>33<br>44<br>54 |
| 65<br>98<br>2  | ZSCA<br>N18  | Zinc finger and SCAN domain containing 18                           | 7.<br>10<br>39<br>3 | 7.<br>06<br>83<br>8 | 7.<br>59<br>12<br>6 | 3.<br>59<br>99<br>2 | 6.<br>12<br>45<br>5 | 4.<br>73<br>89<br>4 | -5.<br>401<br>599<br>466 | -2.<br>433<br>386<br>667 | 5.4<br>01<br>59<br>94<br>66 | D<br>o<br>w<br>n | 0.0<br>04<br>83<br>14<br>31 | 0.2<br>60<br>37<br>51<br>7  |
| 84<br>74<br>7  | UNC1<br>19B  | Unc-119 lipid binding chaperone B                                   | 5.<br>90<br>02<br>1 | 6.<br>39<br>29<br>9 | 7.<br>10<br>06<br>1 | 5.<br>02<br>22<br>1 | 5.<br>34<br>09<br>3 | 5.<br>21<br>15<br>6 | -2.<br>416<br>697<br>107 | -1.<br>273<br>036<br>667 | 2.4<br>16<br>69<br>71<br>07 | D<br>o<br>w<br>n | 0.0<br>06<br>13<br>27<br>53 | 0.2<br>79<br>59<br>97<br>64 |
| 51<br>20<br>3  | NUSA<br>P1   | Nucleolar and spindle associated protein 1                          | 4.<br>16<br>22<br>2 | 3.<br>26<br>89<br>2 | 3.<br>49<br>95<br>7 | 5.<br>90<br>60<br>3 | 6.<br>66<br>57<br>7 | 5.<br>47<br>05      | 5.1<br>713<br>107<br>48  | 2.3<br>705<br>3          | 5.1<br>71<br>31<br>07<br>48 | U<br>p           | 0.0<br>00<br>39<br>68<br>69 | 0.1<br>60<br>90<br>15<br>41 |
| 10<br>32<br>4  | KLHL<br>41   | Kelch like family member 41                                         | 6.<br>88<br>80<br>7 | 4.<br>96<br>23<br>1 | 5.<br>02<br>33<br>9 | 4.<br>41<br>69<br>8 | 4.<br>31<br>60<br>8 | 3.<br>46<br>17<br>8 | -2.<br>947<br>809<br>58  | -1.<br>559<br>643<br>333 | 2.9<br>47<br>80<br>95<br>8  | D<br>o<br>w<br>n | 0.0<br>26<br>86<br>75<br>27 | 0.3<br>88<br>38<br>41<br>04 |
| 83<br>53<br>9  | CHST9        | Carbohydrate (N-acetylgalactosamine 4-0) sulfotransferase 9         | 4.<br>91<br>65<br>3 | 4.<br>94<br>78<br>8 | 4.<br>70<br>22<br>7 | 3.<br>98<br>22<br>4 | 3.<br>53<br>15      | 3.<br>86<br>36<br>7 | -2.<br>089<br>401<br>865 | -1.<br>063<br>09         | 2.0<br>89<br>40<br>18<br>65 | D<br>o<br>w<br>n | 0.0<br>00<br>95<br>76<br>9  | 0.1<br>86<br>14<br>79<br>2  |

|                |               |                                                         |                     |                     |                     |                     |                     |                     |                          |                                   |                             |                  |                             |                             |
|----------------|---------------|---------------------------------------------------------|---------------------|---------------------|---------------------|---------------------|---------------------|---------------------|--------------------------|-----------------------------------|-----------------------------|------------------|-----------------------------|-----------------------------|
| 21<br>97<br>90 | RTKN<br>2     | Rhotekin 2                                              | 3.<br>07<br>51<br>2 | 4.<br>11<br>54<br>6 | 4.<br>03<br>55<br>7 | 5.<br>04<br>35      | 4.<br>94<br>30<br>9 | 5.<br>59<br>10<br>8 | 2.7<br>330<br>401<br>74  | 1.4<br>505<br>066<br>67           | 2.7<br>33<br>04<br>01<br>74 | U<br>p           | 0.0<br>03<br>54<br>59<br>31 | 0.2<br>37<br>14<br>66<br>6  |
| 51<br>01<br>2  | PRELI<br>D3B  | PRELI domain<br>containing 3B                           | 5.<br>29<br>92<br>6 | 5.<br>42<br>88<br>8 | 5.<br>40<br>48<br>4 | 7.<br>04<br>23<br>5 | 7.<br>02<br>03<br>7 | 5.<br>76<br>05<br>9 | 2.3<br>458<br>487<br>54  | 1.2<br>301<br>1<br>84<br>87<br>54 | 2.3<br>45<br>84<br>87<br>54 | U<br>p           | 0.0<br>12<br>97<br>31<br>33 | 0.3<br>36<br>17<br>41<br>55 |
| 81<br>55<br>7  | MAGE<br>D4B   | Melanoma antigen<br>family D4B                          | 6.<br>73<br>66<br>1 | 7.<br>78<br>26<br>7 | 7.<br>88<br>61<br>3 | 5.<br>55<br>04      | 5.<br>72<br>10<br>3 | 6.<br>69<br>70<br>9 | -2.<br>787<br>483<br>631 | -1.<br>478<br>963<br>333          | 2.7<br>87<br>48<br>36<br>31 | D<br>o<br>w<br>n | 0.0<br>11<br>09<br>69<br>59 | 0.3<br>24<br>51<br>13<br>09 |
| 93<br>66<br>4  | CADP<br>S2    | Ca <sup>++</sup> -dependent<br>secretion activator<br>2 | 6.<br>23<br>92      | 7.<br>03<br>66<br>4 | 7.<br>05<br>97<br>1 | 5.<br>29<br>26<br>7 | 4.<br>73<br>58<br>5 | 4.<br>61<br>46<br>3 | -3.<br>725<br>584<br>194 | -1.<br>897<br>466<br>667          | 3.7<br>25<br>58<br>41<br>94 | D<br>o<br>w<br>n | 0.0<br>00<br>55<br>54<br>31 | 0.1<br>64<br>81<br>87<br>25 |
| 89<br>35       | SKAP2         | Src kinase<br>associated<br>phosphoprotein 2            | 5.<br>64<br>61<br>9 | 4.<br>28<br>29<br>6 | 4.<br>86<br>03<br>8 | 5.<br>33<br>18<br>1 | 7.<br>29<br>69<br>7 | 6.<br>69<br>56<br>5 | 2.8<br>513<br>266<br>67  | 1.5<br>116<br>333<br>33           | 2.8<br>51<br>32<br>66<br>67 | U<br>p           | 0.0<br>31<br>60<br>98<br>85 | 0.4<br>01<br>56<br>52<br>84 |
| 97<br>35       | KNTC<br>1     | Kinetocho<br>associated 1                               | 5.<br>07<br>48<br>4 | 5.<br>17<br>49<br>7 | 5.<br>35<br>88<br>9 | 5.<br>81<br>66<br>6 | 7.<br>05<br>65<br>6 | 6.<br>63<br>38<br>5 | 2.4<br>613<br>616<br>79  | 1.2<br>994<br>566<br>67           | 2.4<br>61<br>36<br>16<br>79 | U<br>p           | 0.0<br>06<br>27<br>24<br>22 | 0.2<br>82<br>64<br>96<br>74 |
| 65<br>35<br>13 | LOC65<br>3513 | Phosphodiesterase<br>4D interacting<br>protein-like     | 4.<br>99<br>21<br>9 | 4.<br>38<br>48<br>7 | 4.<br>28<br>01<br>9 | 5.<br>74<br>22<br>8 | 5.<br>56<br>32      | 5.<br>69<br>20<br>1 | 2.1<br>635<br>693<br>03  | 1.1<br>134<br>133<br>33           | 2.1<br>63<br>56<br>93<br>03 | U<br>p           | 0.0<br>02<br>59<br>35<br>02 | 0.2<br>22<br>69<br>34<br>33 |
| 79<br>60<br>7  | FAM11<br>8B   | Family with<br>sequence<br>similarity 118<br>member B   | 6.<br>96<br>96<br>5 | 7.<br>28<br>93<br>7 | 7.<br>53<br>53<br>9 | 5.<br>66<br>93      | 6.<br>15<br>48<br>2 | 6.<br>74<br>18<br>3 | -2.<br>108<br>406<br>922 | -1.<br>076<br>153<br>333          | 2.1<br>08<br>40<br>69<br>22 | D<br>o<br>w<br>n | 0.0<br>12<br>94<br>23<br>67 | 0.3<br>36<br>17<br>41<br>55 |
| 54<br>73<br>3  | SLC35<br>F2   | Solute carrier<br>family 35 member<br>F2                | 7.<br>40<br>09<br>7 | 7.<br>63<br>89<br>5 | 7.<br>44<br>68<br>5 | 5.<br>90<br>29<br>1 | 7.<br>31<br>98<br>8 | 6.<br>24<br>28      | -2.<br>009<br>811<br>225 | -1.<br>007<br>06                  | 2.0<br>09<br>81<br>12       | D<br>o<br>w<br>n | 0.0<br>32<br>44<br>00       | 0.4<br>04<br>71<br>37       |

|                |            |                                                   |                     |                     |                     |                     |                     |                     |                          |                              |                             |                  |                             |                             |   |
|----------------|------------|---------------------------------------------------|---------------------|---------------------|---------------------|---------------------|---------------------|---------------------|--------------------------|------------------------------|-----------------------------|------------------|-----------------------------|-----------------------------|---|
|                |            |                                                   |                     |                     |                     |                     |                     |                     |                          |                              |                             | 25               |                             | 79                          | 9 |
| 54<br>47<br>2  | TOLLI<br>P | Toll interacting<br>protein                       | 6.<br>61<br>29<br>5 | 6.<br>45<br>69<br>4 | 6.<br>87<br>28<br>7 | 5.<br>56<br>05<br>1 | 5.<br>67<br>55<br>5 | 5.<br>02<br>98<br>2 | -2.<br>338<br>570<br>086 | -1.<br>225<br>626<br>667     | 2.3<br>38<br>57<br>00<br>86 | D<br>o<br>w<br>n | 0.0<br>01<br>94<br>76<br>5  | 0.1<br>98<br>67<br>55<br>98 |   |
| 25<br>43       | GAGE<br>1  | G antigen 1                                       | 4.<br>52<br>15<br>8 | 4.<br>21<br>77<br>2 | 4.<br>33<br>54<br>7 | 4.<br>46<br>90<br>8 | 6.<br>30<br>03<br>5 | 5.<br>69<br>14<br>3 | 2.1<br>866<br>111<br>21  | 1.1<br>286<br>966<br>67      | 2.1<br>86<br>61<br>11<br>21 | U<br>p           | 0.0<br>39<br>74<br>28<br>51 | 0.4<br>23<br>82<br>07<br>35 |   |
| 58<br>27       | PXMP<br>2  | Peroxisomal<br>membrane protein<br>2              | 6.<br>75<br>13<br>3 | 5.<br>71<br>99<br>9 | 6.<br>10<br>63<br>5 | 5.<br>39<br>77<br>5 | 5.<br>36<br>60<br>6 | 4.<br>75<br>00<br>2 | -2.<br>029<br>718<br>985 | -1.<br>021<br>28<br>89<br>85 | 2.0<br>29<br>71<br>89<br>85 | D<br>o<br>w<br>n | 0.0<br>17<br>96<br>45<br>32 | 0.3<br>62<br>48<br>76<br>38 |   |
| 49<br>39       | OAS2       | 2'-5'-oligoadenyla<br>te synthetase 2             | 7.<br>42<br>31<br>3 | 7.<br>12<br>18<br>5 | 7.<br>33<br>59<br>7 | 5.<br>12<br>39<br>2 | 6.<br>79<br>44<br>4 | 6.<br>64<br>23<br>5 | -2.<br>153<br>594<br>554 | -1.<br>106<br>746<br>667     | 2.1<br>53<br>59<br>45<br>54 | D<br>o<br>w<br>n | 0.0<br>43<br>96<br>87<br>69 | 0.4<br>33<br>73<br>23<br>05 |   |
| 52<br>22       | PGA5       | Pepsinogen 5,<br>group I<br>(pepsinogen A)        | 7.<br>40<br>62<br>9 | 7.<br>50<br>49<br>7 | 7.<br>27<br>61<br>2 | 6.<br>42<br>32<br>5 | 5.<br>58<br>08<br>6 | 6.<br>58<br>08<br>9 | -2.<br>298<br>660<br>388 | -1.<br>200<br>793<br>333     | 2.2<br>98<br>66<br>03<br>88 | D<br>o<br>w<br>n | 0.0<br>05<br>62<br>13<br>45 | 0.2<br>72<br>48<br>17<br>95 |   |
| 72<br>88<br>33 | FAM7<br>2D | Family with<br>sequence<br>similarity<br>member D | 4.<br>81<br>14<br>4 | 3.<br>76<br>74<br>3 | 4.<br>33<br>53<br>2 | 7.<br>00<br>88<br>8 | 6.<br>35<br>93<br>6 | 5.<br>57<br>41<br>2 | 4.0<br>261<br>195<br>17  | 2.0<br>093<br>9<br>17        | 4.0<br>26<br>11<br>95<br>17 | U<br>p           | 0.0<br>02<br>23<br>84<br>85 | 0.2<br>11<br>69<br>45<br>53 |   |
| 55<br>60<br>3  | FAM4<br>6A | Family with<br>sequence<br>similarity<br>member A | 8.<br>82<br>21<br>3 | 8.<br>10<br>99<br>9 | 8.<br>16<br>29<br>3 | 7.<br>69<br>48<br>6 | 7.<br>13<br>42<br>1 | 7.<br>04<br>45<br>1 | -2.<br>105<br>009<br>387 | -1.<br>073<br>826<br>667     | 2.1<br>05<br>00<br>93<br>87 | D<br>o<br>w<br>n | 0.0<br>08<br>83<br>67<br>56 | 0.3<br>08<br>52<br>19<br>75 |   |
| 13<br>98<br>86 | SPIN4      | Spindlin family<br>member 4                       | 4.<br>58<br>68<br>6 | 4.<br>67<br>77<br>4 | 4.<br>81<br>39<br>4 | 5.<br>61<br>22<br>1 | 6.<br>55<br>18<br>1 | 6.<br>04<br>83<br>5 | 2.5<br>989<br>700<br>35  | 1.3<br>779<br>4<br>35        | 2.5<br>98<br>97<br>00<br>35 | U<br>p           | 0.0<br>01<br>58<br>52<br>13 | 0.1<br>87<br>10<br>78<br>18 |   |
| 11<br>86<br>63 | BTBD<br>16 | BTB (POZ)<br>domain containing<br>16              | 3.<br>80<br>03      | 4.<br>13<br>50      | 4.<br>48<br>49      | 5.<br>01<br>08      | 4.<br>50<br>49      | 5.<br>91<br>16      | 2.0<br>032<br>697        | 1.0<br>023<br>566            | 2.0<br>03<br>26             | U<br>p           | 0.0<br>34<br>57             | 0.4<br>08<br>42             |   |

|    |           |                                                                    |         |         |         |         |         |         |           |           |          |   |       |         |
|----|-----------|--------------------------------------------------------------------|---------|---------|---------|---------|---------|---------|-----------|-----------|----------|---|-------|---------|
|    |           |                                                                    | 6       | 1       | 2       |         | 4       | 2       | 04        | 67        | 97       |   | 27    | 39      |
| 27 | GNG7      | Guanine nucleotide binding protein (G protein), $\gamma$ 7         | 4.41284 | 4.90527 | 5.25769 | 3.98864 | 3.69186 | 3.55994 | -2.161131 | -1.111786 | 2.161113 | D | 0.003 | 0.23853 |
| 28 | CES4A     | Carboxylesterase 4A                                                | 5.78111 | 6.94668 | 5.59121 | 3.68093 | 4.40493 | 5.81129 | -2.77813  | -1.47395  | 2.77781  | D | 0.043 | 0.43373 |
| 28 | TRDC      | T cell receptor $\Delta$ constant                                  | 4.4263  | 6.75331 | 6.17855 | 3.08817 | 4.14957 | 3.82033 | -4.287182 | -2.10003  | 4.28718  | D | 0.010 | 0.32243 |
| 72 | LOC729737 | Uncharacterized LOC729737                                          | 8.03359 | 8.30848 | 7.49201 | 5.71049 | 6.09297 | 7.81824 | -2.646575 | -1.404126 | 2.64652  | D | 0.040 | 0.42435 |
| 52 | PGM1      | Phosphoglucomutase 1                                               | 7.0429  | 7.33283 | 7.18712 | 5.18152 | 6.94968 | 5.67531 | -2.381900 | -1.252113 | 2.38108  | D | 0.026 | 0.3841  |
| 13 | ADH6      | Alcohol dehydrogenase 6 (class V)                                  | 5.78562 | 7.70429 | 7.66583 | 6.00123 | 4.82238 | 5.45192 | -2.650516 | -1.406273 | 2.65061  | D | 0.032 | 0.40382 |
| 78 | CACNA2D1  | Calcium channel, voltage-dependent, $\alpha$ 2/ $\Delta$ subunit 1 | 5.46459 | 4.53931 | 4.35603 | 5.95447 | 6.25203 | 5.50581 | 2.169646  | 1.1746    | 2.16964  | U | 0.016 | 0.35380 |
| 79 | AGMAT     | Agmatinase                                                         | 4.86416 | 4.88425 | 5.34797 | 7.53826 | 7.54528 | 5.36752 | 3.445952  | 1.784893  | 3.44598  | U | 0.019 | 0.36776 |
| 80 | WNT10A    | Wingless-type MMTV                                                 | 3.43    | 4.10    | 3.60    | 4.03    | 5.49    | 6.06    | 2.7986    | 1.4847    | 2.798    | U | 0.022 | 0.379   |

|                           |                      |                                                  |                     |                      |                      |                      |                      |                      |                          |                          |                             |                  |                             |                             |
|---------------------------|----------------------|--------------------------------------------------|---------------------|----------------------|----------------------|----------------------|----------------------|----------------------|--------------------------|--------------------------|-----------------------------|------------------|-----------------------------|-----------------------------|
| 6                         |                      | integration site<br>family member<br>10A         | 40<br>5             | 78<br>7              | 49<br>8              | 45<br>9              | 83<br>2              | 81<br>9              | 543<br>82                | 333<br>33                | 65<br>43<br>82              |                  | 83<br>51<br>91              | 92<br>11<br>68              |
| 59                        | ACTA<br>2            | Actin, $\alpha$ 2, smooth<br>muscle, aorta       | 8.<br>42<br>96<br>2 | 7.<br>81<br>67<br>3  | 7.<br>87<br>39<br>3  | 8.<br>24<br>65<br>3  | 11<br>.1<br>63<br>5  | 9.<br>77<br>58<br>4  | 3.2<br>232<br>810<br>77  | 1.6<br>885<br>3          | 3.2<br>23<br>28<br>10<br>77 | U<br>p           | 0.0<br>42<br>95<br>78<br>79 | 0.4<br>32<br>07<br>88<br>1  |
| 39<br>25                  | STMN<br>1            | Stathmin 1                                       | 5.<br>88<br>37<br>1 | 4.<br>97<br>20<br>2  | 5.<br>13<br>69<br>8  | 6.<br>68<br>94<br>5  | 6.<br>84<br>61<br>9  | 6.<br>46<br>84<br>5  | 2.5<br>264<br>763<br>35  | 1.3<br>371<br>266<br>67  | 2.5<br>26<br>47<br>63<br>35 | U<br>p           | 0.0<br>02<br>61<br>05<br>24 | 0.2<br>23<br>66<br>35<br>21 |
| 27<br>12<br>1             | DKK4                 | Dickkopf WNT<br>signaling pathway<br>inhibitor 4 | 5.<br>21<br>34      | 12<br>.7<br>60<br>59 | 12<br>.7<br>22<br>89 | 5.<br>34<br>09<br>3  | 4.<br>70<br>01<br>1  | 5.<br>18<br>09<br>7  | -35<br>.71<br>083<br>592 | -5.<br>158<br>29         | 35.<br>71<br>08<br>35<br>92 | D<br>o<br>w<br>n | 0.0<br>31<br>59<br>29<br>24 | 0.4<br>01<br>56<br>52<br>84 |
| 10<br>53<br>76<br>33<br>3 | LOC10<br>537633<br>3 | Formin-like<br>protein 6                         | 8.<br>03<br>35<br>9 | 8.<br>30<br>84<br>8  | 7.<br>49<br>20<br>1  | 5.<br>71<br>04<br>9  | 6.<br>09<br>29<br>7  | 7.<br>81<br>82<br>4  | -2.<br>646<br>575<br>235 | -1.<br>404<br>126<br>667 | 2.6<br>46<br>57<br>52<br>35 | D<br>o<br>w<br>n | 0.0<br>40<br>05<br>82<br>98 | 0.4<br>24<br>35<br>94<br>44 |
| 71<br>03                  | TSPA<br>N8           | Tetraspanin 8                                    | 9.<br>83<br>56<br>8 | 9.<br>23<br>66<br>5  | 8.<br>97<br>73<br>7  | 12<br>.4<br>13<br>15 | 11<br>.7<br>09<br>58 | 11<br>.3<br>37<br>28 | 5.5<br>408<br>347<br>22  | 2.4<br>701<br>033<br>33  | 5.5<br>40<br>83<br>47<br>22 | U<br>p           | 0.0<br>00<br>24<br>23<br>06 | 0.1<br>47<br>96<br>12<br>36 |
| 85<br>36<br>3             | TRIM5                | Tripartite motif<br>containing 5                 | 5.<br>88<br>03<br>3 | 6.<br>14<br>83       | 5.<br>99<br>27<br>3  | 4.<br>75<br>92<br>2  | 5.<br>08<br>09<br>1  | 5.<br>13<br>91<br>1  | -2.<br>019<br>563<br>255 | -1.<br>014<br>043<br>333 | 2.0<br>19<br>56<br>32<br>55 | D<br>o<br>w<br>n | 0.0<br>01<br>77<br>64<br>14 | 0.1<br>92<br>29<br>25<br>84 |
| 28<br>44<br>22            | SMIM<br>24           | Small integral<br>membrane protein<br>24         | 9.<br>90<br>47      | 8.<br>39<br>14<br>2  | 10<br>.6<br>36<br>65 | 7.<br>65<br>75<br>8  | 8.<br>57<br>33<br>5  | 7.<br>60<br>47<br>8  | -3.<br>246<br>803<br>334 | -1.<br>699<br>02         | 3.2<br>46<br>80<br>33<br>34 | D<br>o<br>w<br>n | 0.0<br>23<br>31<br>82<br>95 | 0.3<br>80<br>85<br>39<br>85 |
| 22<br>82<br>1             | RASA<br>3            | RAS p21 protein<br>activator 3                   | 6.<br>01<br>18<br>2 | 4.<br>40<br>62<br>2  | 4.<br>59<br>12<br>1  | 5.<br>87<br>20<br>2  | 6.<br>65<br>31<br>5  | 6.<br>30<br>98<br>8  | 2.4<br>204<br>355<br>29  | 1.2<br>752<br>666<br>67  | 2.4<br>20<br>43<br>55<br>29 | U<br>p           | 0.0<br>27<br>36<br>50<br>7  | 0.3<br>89<br>83<br>37<br>07 |
| 37                        | KCNS                 | Potassium                                        | 8.                  | 5.                   | 6.                   | 4.                   | 4.                   | 4.                   | -5.                      | -2.                      | 5.0                         | D                | 0.0                         | 0.3                         |

|        |         |                                                         |        |        |        |        |        |        |             |             |             |                  |             |             |
|--------|---------|---------------------------------------------------------|--------|--------|--------|--------|--------|--------|-------------|-------------|-------------|------------------|-------------|-------------|
| 87     | 1       | voltage-gated channel, modifier subfamily S, member 1   | 4699   | 2831   | 3740   | 3005   | 2737   | 5744   | 014166837   | 32601       | 14166837    | o<br>w<br>n      | 16090218    | 52385371    |
| 134285 | TMEM171 | Transmembrane protein 171                               | 46313  | 4918   | 5384   | 64014  | 86034  | 7185   | 5.35209355  | 2.42010333  | 5.3520935   | U<br>p           | 0.0180448   | 0.234239382 |
| 2305   | FOXM1   | Forkhead box M1                                         | 549011 | 481952 | 536481 | 709182 | 78029  | 61426  | 3.4431843   | 1.7837433   | 3.44318413  | U<br>p           | 0.00479551  | 0.260263927 |
| 10517  | FBXW10  | F-box and WD repeat domain containing 10                | 416914 | 54548  | 529833 | 414976 | 324738 | 382496 | -235188162  | -123339     | 2.351188162 | D<br>o<br>w<br>n | 0.017653754 | 0.361123337 |
| 643752 | RAP1BL  | RAP1B, member of RAS oncogene family pseudogene         | 687926 | 645431 | 64404  | 9294   | 72915  | 719915 | 2.896364821 | 1.5342433   | 2.8964821   | U<br>p           | 0.0127739   | 0.372540654 |
| 55966  | AJAP1   | Adherens junctions associated protein 1                 | 466522 | 653278 | 630433 | 42629  | 417423 | 41737  | -285585     | -1513936667 | 2.855882585 | D<br>o<br>w<br>n | 0.016935456 | 0.358424346 |
| 4782   | NFIC    | Nuclear factor I/C (CCAAT-binding transcription factor) | 762041 | 70614  | 710072 | 633194 | 616048 | 50687  | -2652126    | -1407146667 | 2.6521126   | D<br>o<br>w<br>n | 0.007575616 | 0.295829027 |
| 29899  | GPSM2   | G-protein signaling modulator 2                         | 391558 | 469379 | 452522 | 605471 | 671237 | 512498 | 3.001790585 | 1.5858233   | 3.001790585 | U<br>p           | 0.007809961 | 0.299139554 |
| 728441 | GGT2    | Γ-glutamyltransferase 2                                 | 916157 | 931314 | 859698 | 748881 | 756931 | 595581 | -4053739364 | -2019253333 | 4.053739364 | D<br>o<br>w<br>n | 0.003671527 | 0.2385983   |

|        |                 |                                                        |         |          |         |         |         |         |           |           |          |   |           |           |
|--------|-----------------|--------------------------------------------------------|---------|----------|---------|---------|---------|---------|-----------|-----------|----------|---|-----------|-----------|
| 219902 | TMEM136         | Transmembrane protein 136                              | 6.41197 | 5.76339  | 5.35414 | 4.08074 | 5.15736 | 5.10282 | -2.089068 | -1.06286  | 2.089068 | D | 0.031161  | 0.4003398 |
| 57464  | STRIP2          | Striatin interacting protein 2                         | 6.8528  | 6.38219  | 5.25826 | 5.23615 | 5.23615 | 4.76132 | -2.123646 | -1.086543 | 2.123646 | D | 0.0359435 | 0.4124733 |
| 57604  | KIAA1456        | KIAA1456                                               | 7.92697 | 6.48541  | 6.16856 | 6.14762 | 5.38256 | 5.58893 | -2.225212 | -1.153943 | 2.225212 | D | 0.0252841 | 0.444553  |
| 678    | ZFP36L2         | ZFP36 ring finger protein-like 2                       | 8.21199 | 7.62164  | 7.79481 | 8.91886 | 9.41289 | 9.38952 | 2.574456  | 1.364267  | 2.574456 | U | 0.0012096 | 0.1861479 |
| 6734   | SRPRA           | SRP receptor $\alpha$ subunit                          | 9.54969 | 10.59367 | 9.87539 | 7.97419 | 8.38233 | 8.48141 | -3.310249 | -1.72694  | 3.310249 | D | 0.0012497 | 0.1861479 |
| 285440 | CYP4V2          | Cytochrome P450, family 4, subfamily V, polypeptide 2  | 9.22768 | 9.03516  | 9.15246 | 8.87377 | 7.4972  | 7.9009  | -2.067389 | -1.04781  | 2.067389 | D | 0.0240366 | 0.3816949 |
| 407977 | TNFSF12-TNFSF13 | TNFSF12-TNFSF13 readthrough                            | 8.30848 | 8.37082  | 9.27544 | 7.44214 | 7.87419 | 6.30389 | -2.722326 | -1.44484  | 2.722326 | D | 0.0223263 | 0.3611337 |
| 51704  | GPRC5B          | G protein-coupled receptor, class C, group 5, member B | 8.24991 | 8.11348  | 6.91822 | 5.96946 | 6.93405 | 6.83896 | -2.265317 | -1.179713 | 2.265317 | D | 0.0312642 | 0.4007422 |
| 38     | ACAT1           | Acetyl-coa acetyltransferase 1                         | 7.2016  | 7.78037  | 7.3237  | 6.18713 | 6.91257 | 5.68653 | -2.265474 | -1.179813 | 2.265474 | D | 0.0654746 | 0.3361741 |

|                           |             |                                                               |                     |                     |                     |                     |                     |                      |                          |                         |                             |                  |                             |                             |    |
|---------------------------|-------------|---------------------------------------------------------------|---------------------|---------------------|---------------------|---------------------|---------------------|----------------------|--------------------------|-------------------------|-----------------------------|------------------|-----------------------------|-----------------------------|----|
|                           |             |                                                               |                     |                     |                     |                     |                     |                      |                          |                         |                             | 28               |                             | 82                          | 55 |
| 93<br>19                  | TRIP1<br>3  | Thyroid hormone<br>receptor interactor<br>13                  | 4.<br>16<br>16<br>3 | 3.<br>79<br>93<br>2 | 3.<br>86<br>29<br>7 | 4.<br>72<br>38<br>9 | 5.<br>80<br>11<br>8 | 5.<br>27<br>14<br>8  | 2.5<br>039<br>573<br>69  | 1.3<br>242<br>1         | 2.5<br>03<br>95<br>73<br>69 | U<br>p           | 0.0<br>03<br>05<br>02<br>02 | 0.2<br>34<br>00<br>38<br>89 |    |
| 62<br>81                  | S100A<br>10 | S100 calcium<br>binding protein<br>A10                        | 9.<br>86<br>81<br>4 | 9.<br>53<br>82<br>5 | 9.<br>97<br>41<br>9 | 10<br>.8<br>75      | 11<br>.2<br>84<br>2 | 12<br>.0<br>48<br>67 | 3.0<br>506<br>077<br>03  | 1.6<br>090<br>966<br>67 | 3.0<br>50<br>60<br>77<br>03 | U<br>p           | 0.0<br>01<br>98<br>81<br>48 | 0.2<br>01<br>23<br>04<br>31 |    |
| 52<br>08                  | PFKFB<br>2  | 6-phosphofructo-2<br>-kinase/fructose-2,<br>6-biphosphatase 2 | 4.<br>21<br>07<br>8 | 5.<br>00<br>34<br>5 | 4.<br>98<br>88<br>4 | 7.<br>37<br>27<br>7 | 6.<br>39<br>97<br>6 | 5.<br>35<br>82<br>9  | 3.1<br>222<br>441<br>01  | 1.6<br>425<br>833<br>33 | 3.1<br>22<br>24<br>41<br>01 | U<br>p           | 0.0<br>15<br>60<br>72<br>24 | 0.3<br>50<br>84<br>39<br>38 |    |
| 98<br>3                   | CDK1        | Cyclin-dependent<br>kinase 1                                  | 5.<br>27<br>41<br>5 | 4.<br>16<br>41<br>6 | 4.<br>85<br>05<br>2 | 6.<br>76<br>35<br>1 | 7.<br>37<br>47      | 5.<br>95<br>50<br>2  | 3.8<br>232<br>512<br>18  | 1.9<br>348              | 3.8<br>23<br>25<br>12<br>18 | U<br>p           | 0.0<br>03<br>08<br>45<br>28 | 0.2<br>34<br>23<br>93<br>82 |    |
| 29<br>08<br>9             | UBE2<br>T   | Ubiquitin<br>conjugating<br>enzyme E2T                        | 6.<br>34<br>94<br>6 | 6.<br>37<br>94<br>2 | 6.<br>72<br>83<br>3 | 8.<br>82<br>22<br>4 | 8.<br>72<br>43<br>8 | 7.<br>58<br>76<br>9  | 3.7<br>124<br>373<br>17  | 1.8<br>923<br>666<br>67 | 3.7<br>12<br>43<br>73<br>17 | U<br>p           | 0.0<br>01<br>32<br>48<br>19 | 0.1<br>87<br>10<br>78<br>18 |    |
| 10<br>19<br>29<br>53<br>0 | FANCD2P2    | Fanconi anemia<br>complementation<br>group D2<br>pseudogene 2 | 4.<br>59<br>27<br>4 | 3.<br>96<br>19<br>3 | 4.<br>03<br>95<br>2 | 5.<br>16<br>71      | 5.<br>71<br>96      | 5.<br>33<br>09<br>1  | 2.3<br>098<br>620<br>07  | 1.2<br>078<br>066<br>67 | 2.3<br>09<br>86<br>20<br>07 | U<br>p           | 0.0<br>02<br>18<br>84<br>52 | 0.2<br>10<br>07<br>53<br>08 |    |
| 25<br>92<br>17            | HSPA1<br>2A | Heat shock protein<br>family A (Hsp70)<br>member 12A          | 7.<br>45<br>02<br>3 | 5.<br>90<br>20<br>5 | 5.<br>32<br>82<br>5 | 4.<br>57<br>22<br>3 | 4.<br>45<br>74<br>5 | 3.<br>64<br>62<br>9  | -4.<br>004<br>216<br>556 | -2.<br>001<br>52        | 4.0<br>04<br>21<br>65<br>56 | D<br>o<br>w<br>n | 0.0<br>08<br>97<br>37<br>05 | 0.3<br>09<br>26<br>17<br>51 |    |
| 21<br>22                  | MECOM       | MDS1 and EVI1<br>complex locus                                | 6.<br>35<br>63<br>9 | 7.<br>24<br>01<br>6 | 5.<br>80<br>35<br>8 | 8.<br>67<br>72<br>5 | 8.<br>18<br>61<br>5 | 8.<br>79<br>13<br>9  | 4.2<br>424<br>176<br>82  | 2.0<br>848<br>866<br>67 | 4.2<br>42<br>41<br>76<br>82 | U<br>p           | 0.0<br>01<br>17<br>36<br>61 | 0.1<br>86<br>14<br>79<br>2  |    |
| 70<br>42                  | TGFB2       | Transforming<br>growth factor $\beta$ 2                       | 5.<br>82<br>01      | 7.<br>51<br>22      | 7.<br>42<br>66      | 5.<br>70<br>94      | 5.<br>51<br>33      | 5.<br>87<br>18       | -2.<br>331<br>858        | -1.<br>221<br>48        | 2.3<br>31<br>85             | D<br>o<br>w      | 0.0<br>33<br>87             | 0.4<br>08<br>23             |    |



|    |       |                                                            |          |          |          |          |          |          |           |           |          |   |     |     |
|----|-------|------------------------------------------------------------|----------|----------|----------|----------|----------|----------|-----------|-----------|----------|---|-----|-----|
|    |       |                                                            | 5        | 8        | 8        | 7        | 6        | 4        | 101       |           | 81       | n | 18  | 98  |
| 26 | HSPB8 | Heat shock protein family B (small) member 8               | 6.92993  | 7.44949  | 5.29762  | 4.18345  | 5.25748  | 5.05475  | -3.310662 | -1.72712  | 3.310662 | D | 0.0 | 0.3 |
| 35 |       |                                                            |          |          |          |          |          |          |           |           | 10       | o | 20  | 71  |
| 3  |       |                                                            |          |          |          |          |          |          |           |           | 66       | w | 90  | 99  |
|    |       |                                                            |          |          |          |          |          |          |           |           | 26       | n | 90  | 34  |
|    |       |                                                            |          |          |          |          |          |          |           |           | 26       |   | 99  | 38  |
| 41 | MAN1  | Mannosidase, $\alpha$ , class 1A, member 1                 | 9.14218  | 8.45795  | 8.76062  | 6.46788  | 8.45134  | 7.1627   | -2.687522 | -1.426276 | 2.687522 | D | 0.0 | 0.3 |
| 21 | A1    |                                                            |          |          |          |          |          |          |           |           | 87       | o | 25  | 83  |
|    |       |                                                            |          |          |          |          |          |          |           |           | 52       | w | 28  | 71  |
|    |       |                                                            |          |          |          |          |          |          |           |           | 21       | n | 00  | 27  |
|    |       |                                                            |          |          |          |          |          |          |           |           | 9        |   | 19  | 62  |
| 88 | ST3G  | ST3 $\beta$ -galactoside $\alpha$ -2,3-sialyltransferase 5 | 5.87519  | 5.524    | 5.54874  | 3.75544  | 4.46329  | 4.70694  | -2.338629 | -1.225663 | 2.338629 | D | 0.0 | 0.2 |
| 69 | AL5   |                                                            |          |          |          |          |          |          |           |           | 38       | o | 05  | 69  |
|    |       |                                                            |          |          |          |          |          |          |           |           | 62       | w | 37  | 32  |
|    |       |                                                            |          |          |          |          |          |          |           |           | 95       | n | 26  | 15  |
|    |       |                                                            |          |          |          |          |          |          |           |           | 23       |   | 82  | 26  |
| 15 | CDCA  | Cell division cycle associated 2                           | 5.08689  | 5.09782  | 5.09782  | 6.76416  | 6.34826  | 6.25228  | 2.568177  | 1.360733  | 2.568177 | U | 0.0 | 0.1 |
| 73 | 2     |                                                            |          |          |          |          |          |          |           |           | 68       | p | 00  | 63  |
| 13 |       |                                                            |          |          |          |          |          |          |           |           | 13       |   | 41  | 37  |
|    |       |                                                            |          |          |          |          |          |          |           |           | 90       |   | 57  | 87  |
|    |       |                                                            |          |          |          |          |          |          |           |           | 77       |   | 65  | 34  |
| 10 | PLK4  | Polo-like kinase 4                                         | 4.36849  | 4.400581 | 3.82253  | 5.522162 | 5.681233 | 4.884833 | 2.292517  | 1.19695   | 2.292517 | U | 0.0 | 0.2 |
| 73 |       |                                                            |          |          |          |          |          |          |           |           | 92       | p | 02  | 32  |
| 3  |       |                                                            |          |          |          |          |          |          |           |           | 54       |   | 96  | 32  |
|    |       |                                                            |          |          |          |          |          |          |           |           | 49       |   | 14  | 78  |
|    |       |                                                            |          |          |          |          |          |          |           |           | 17       |   | 08  | 35  |
| 55 | CNDP  | CNDP dipeptidase 2 (metallopeptidase M20 family)           | 8.78507  | 8.78247  | 9.17903  | 8.47809  | 7.63875  | 6.53131  | -2.577799 | -1.36614  | 2.577799 | D | 0.0 | 0.3 |
| 74 | 2     |                                                            |          |          |          |          |          |          |           |           | 77       | o | 24  | 83  |
| 8  |       |                                                            |          |          |          |          |          |          |           |           | 79       | w | 57  | 08  |
|    |       |                                                            |          |          |          |          |          |          |           |           | 94       | n | 14  | 92  |
|    |       |                                                            |          |          |          |          |          |          |           |           |          |   | 15  | 58  |
| 23 | FN1   | Fibronectin 1                                              | 8.38712  | 6.15369  | 6.42419  | 9.90123  | 11.37627 | 8.48352  | 6.198892  | 2.632066  | 6.198892 | U | 0.0 | 0.3 |
| 35 |       |                                                            |          |          |          |          |          |          |           |           | 98       | p | 20  | 71  |
|    |       |                                                            |          |          |          |          |          |          |           |           | 87       |   | 64  | 59  |
|    |       |                                                            |          |          |          |          |          |          |           |           | 60       |   | 57  | 28  |
|    |       |                                                            |          |          |          |          |          |          |           |           | 92       |   |     | 73  |
| 53 | PLD1  | Phospholipase D1                                           | 10.92043 | 9.20562  | 10.81853 | 9.22306  | 8.16638  | 8.26539  | -3.394619 | -1.76325  | 3.394619 | D | 0.0 | 0.3 |
| 37 |       |                                                            |          |          |          |          |          |          |           |           | 94       | o | 12  | 34  |
|    |       |                                                            |          |          |          |          |          |          |           |           | 61       | w | 51  | 46  |
|    |       |                                                            |          |          |          |          |          |          |           |           | 97       | n | 28  | 67  |
|    |       |                                                            |          |          |          |          |          |          |           |           | 99       |   | 77  | 31  |
| 44 | NR2F1 | NR2F1 antisense RNA 1                                      | 7.66     | 8.62     | 8.821    | 6.620    | 7.09     | 6.64     | -2.874    | -1.523    | 2.874    | D | 0.0 | 0.2 |
| 10 | -AS1  |                                                            |          |          |          |          |          |          |           |           | 74       | o | 03  | 34  |

|                           |                      |                                                      |                     |                     |                     |                     |                     |                     |                          |                          |                             |                  |                             |                             |
|---------------------------|----------------------|------------------------------------------------------|---------------------|---------------------|---------------------|---------------------|---------------------|---------------------|--------------------------|--------------------------|-----------------------------|------------------|-----------------------------|-----------------------------|
| 94                        |                      |                                                      | 79<br>1             | 88<br>6             | 57<br>8             | 26<br>9             | 48<br>4             | 44<br>8             | 903<br>106               | 513<br>333               | 90<br>31<br>06              | w<br>n           | 06<br>06<br>36              | 00<br>38<br>89              |
| 55<br>07                  | PPP1R<br>3C          | Protein<br>phosphatase 1<br>regulatory subunit<br>3C | 6.<br>17<br>37<br>9 | 5.<br>97<br>35<br>6 | 5.<br>36<br>7       | 3.<br>51<br>03      | 4.<br>10<br>79<br>3 | 4.<br>98<br>85      | -3.<br>107<br>756<br>206 | -1.<br>635<br>873<br>333 | 3.1<br>07<br>75<br>62<br>06 | D<br>o<br>w<br>n | 0.0<br>05<br>40<br>93<br>32 | 0.2<br>69<br>32<br>15<br>26 |
| 10<br>53<br>79<br>25<br>2 | LOC10<br>537925<br>2 | Coiled-coil<br>domain-containing<br>protein 29-like  | 7.<br>46<br>14<br>8 | 7.<br>42<br>23<br>2 | 7.<br>32<br>89<br>1 | 7.<br>15<br>84<br>3 | 5.<br>30<br>81<br>1 | 5.<br>41<br>93<br>7 | -2.<br>717<br>474<br>819 | -1.<br>442<br>266<br>667 | 2.7<br>17<br>47<br>48<br>19 | D<br>o<br>w<br>n | 0.0<br>22<br>22<br>55<br>45 | 0.3<br>78<br>35<br>72<br>21 |
| 64<br>35<br>9             | NXN                  | Nucleoredoxin                                        | 6.<br>70<br>78<br>4 | 7.<br>57<br>80<br>2 | 7.<br>51<br>87<br>4 | 5.<br>52<br>96      | 6.<br>39<br>78<br>6 | 6.<br>17<br>67<br>8 | -2.<br>351<br>291<br>379 | -1.<br>233<br>453<br>333 | 2.3<br>51<br>29<br>13<br>79 | D<br>o<br>w<br>n | 0.0<br>09<br>11<br>57<br>39 | 0.3<br>10<br>47<br>42<br>9  |
| 68<br>11                  | STX5                 | Syntaxin 5                                           | 7.<br>88<br>63<br>7 | 8.<br>79<br>86<br>6 | 8.<br>56<br>33<br>4 | 6.<br>86<br>49<br>8 | 7.<br>59<br>93<br>2 | 7.<br>50<br>84<br>5 | -2.<br>131<br>506<br>321 | -1.<br>091<br>873<br>333 | 2.1<br>31<br>50<br>63<br>21 | D<br>o<br>w<br>n | 0.0<br>13<br>06<br>11<br>85 | 0.3<br>36<br>17<br>41<br>55 |
| 58<br>01                  | PTPRR                | Protein tyrosine<br>phosphatase,<br>receptor type, R | 6.<br>32<br>24<br>8 | 3.<br>43<br>2       | 3.<br>56<br>29<br>7 | 6.<br>79<br>83<br>5 | 5.<br>87<br>06<br>5 | 6.<br>29<br>56<br>5 | 3.6<br>868<br>788<br>23  | 1.8<br>824               | 3.6<br>86<br>87<br>88<br>23 | U<br>p           | 0.0<br>43<br>65<br>92<br>09 | 0.4<br>32<br>55<br>70<br>49 |
| 91<br>86<br>0             | CALM<br>L4           | Calmodulin like 4                                    | 8.<br>33<br>47<br>8 | 7.<br>80<br>79<br>4 | 9.<br>07<br>81<br>9 | 9.<br>68<br>32<br>9 | 9.<br>75<br>63<br>3 | 9.<br>17<br>47<br>6 | 2.1<br>903<br>427<br>85  | 1.1<br>311<br>566<br>67  | 2.1<br>90<br>34<br>27<br>85 | U<br>p           | 0.0<br>17<br>25<br>76<br>58 | 0.3<br>60<br>36<br>31<br>48 |
| 55<br>77<br>1             | PRR11                | Proline rich 11                                      | 5.<br>70<br>60<br>2 | 5.<br>14<br>96<br>5 | 5.<br>19<br>69      | 6.<br>08<br>09<br>7 | 6.<br>77<br>11<br>2 | 6.<br>33<br>05<br>9 | 2.0<br>610<br>364<br>22  | 1.0<br>433<br>7          | 2.0<br>61<br>03<br>64<br>22 | U<br>p           | 0.0<br>06<br>60<br>98<br>93 | 0.2<br>86<br>61<br>99<br>1  |
| 50<br>05                  | ORM2                 | Orosomuroid 2                                        | 3.<br>80<br>83<br>1 | 4.<br>63<br>54<br>1 | 5.<br>54<br>52<br>6 | 6.<br>97<br>44<br>8 | 8.<br>07<br>24<br>4 | 5.<br>47<br>83<br>9 | 4.5<br>276<br>946<br>54  | 2.1<br>787<br>766<br>67  | 4.5<br>27<br>69<br>46<br>54 | U<br>p           | 0.0<br>18<br>27<br>69<br>55 | 0.3<br>64<br>08<br>78<br>05 |
| 79                        | MLPH                 | Melanophilin                                         | 9.                  | 10                  | 10                  | 8.                  | 7.                  | 8.                  | -2.                      | -1.                      | 2.7                         | D                | 0.0                         | 0.3                         |

|                |               |                                                                            |                      |                      |                      |                     |                     |                     |                          |                          |                             |                  |                             |                             |
|----------------|---------------|----------------------------------------------------------------------------|----------------------|----------------------|----------------------|---------------------|---------------------|---------------------|--------------------------|--------------------------|-----------------------------|------------------|-----------------------------|-----------------------------|
| 08<br>3        |               |                                                                            | 18<br>86<br>3        | .1<br>17<br>43       | .6<br>62<br>13       | 83<br>15<br>7       | 80<br>86<br>2       | 91<br>44<br>8       | 772<br>472<br>851        | 471<br>173<br>333        | 72<br>47<br>28<br>51        | o<br>w<br>n      | 15<br>71<br>49<br>8         | 50<br>84<br>39<br>38        |
| 55<br>19<br>5  | C14orf<br>105 | Chromosome 14<br>open reading<br>frame 105                                 | 10<br>.5<br>17<br>34 | 10<br>.2<br>10<br>82 | 10<br>.1<br>22<br>71 | 9.<br>24<br>84<br>6 | 6.<br>50<br>30<br>7 | 9.<br>04<br>27<br>2 | -4.<br>052<br>671<br>766 | -2.<br>018<br>873<br>333 | 4.0<br>52<br>67<br>17<br>66 | D<br>o<br>w<br>n | 0.0<br>24<br>00<br>99<br>7  | 0.3<br>81<br>89<br>69<br>49 |
| 84<br>18<br>7  | TMEM<br>164   | Transmembrane<br>protein 164                                               | 6.<br>55<br>50<br>5  | 6.<br>58<br>58<br>3  | 6.<br>89<br>36       | 8.<br>17<br>88      | 7.<br>75<br>02<br>8 | 7.<br>50<br>27<br>4 | 2.1<br>923<br>021<br>77  | 1.1<br>324<br>466<br>67  | 2.1<br>92<br>30<br>21<br>77 | U<br>p           | 0.0<br>02<br>90<br>61<br>87 | 0.2<br>31<br>33<br>53<br>69 |
| 64<br>38<br>34 | PGA3          | Pepsinogen 3,<br>group I<br>(pepsinogen A)                                 | 7.<br>40<br>62<br>9  | 7.<br>50<br>49<br>7  | 7.<br>27<br>61<br>2  | 6.<br>42<br>32<br>5 | 5.<br>58<br>08<br>6 | 6.<br>58<br>08<br>9 | -2.<br>298<br>660<br>388 | -1.<br>200<br>793<br>333 | 2.2<br>98<br>66<br>03<br>88 | D<br>o<br>w<br>n | 0.0<br>05<br>62<br>13<br>45 | 0.2<br>72<br>48<br>17<br>95 |
| 11<br>91       | CLU           | Clusterin                                                                  | 12<br>.8<br>46<br>59 | 12<br>.0<br>71<br>13 | 12<br>.2<br>51<br>49 | 11<br>.9<br>51<br>3 | 9.<br>69<br>93      | 8.<br>13<br>46<br>3 | -5.<br>507<br>229<br>257 | -2.<br>461<br>326<br>667 | 5.5<br>07<br>22<br>92<br>57 | D<br>o<br>w<br>n | 0.0<br>26<br>79<br>91<br>35 | 0.3<br>88<br>38<br>41<br>04 |
| 44<br>14<br>25 | ANKR<br>D20A3 | Ankyrin repeat<br>domain 20 family<br>member A3                            | 7.<br>46<br>14<br>8  | 7.<br>42<br>23<br>2  | 7.<br>32<br>89<br>1  | 7.<br>15<br>84<br>3 | 5.<br>30<br>81<br>1 | 5.<br>41<br>93<br>7 | -2.<br>717<br>474<br>819 | -1.<br>442<br>266<br>667 | 2.7<br>17<br>47<br>48<br>19 | D<br>o<br>w<br>n | 0.0<br>22<br>22<br>55<br>45 | 0.3<br>78<br>35<br>72<br>21 |
| 21<br>19       | ETV5          | Ets variant 5                                                              | 5.<br>49<br>82<br>7  | 7.<br>88<br>40<br>2  | 7.<br>53<br>79<br>4  | 5.<br>68<br>50<br>8 | 4.<br>68<br>40<br>6 | 3.<br>95<br>55<br>4 | -4.<br>590<br>071<br>627 | -2.<br>198<br>516<br>667 | 4.5<br>90<br>07<br>16<br>27 | D<br>o<br>w<br>n | 0.0<br>17<br>11<br>68<br>35 | 0.3<br>59<br>72<br>97<br>69 |
| 54<br>71<br>6  | SLC6A<br>20   | Solute carrier<br>family 6 (proline<br>IMINO<br>transporter),<br>member 20 | 7.<br>28<br>66<br>5  | 5.<br>37<br>60<br>9  | 5.<br>26<br>13<br>8  | 8.<br>25<br>40<br>2 | 7.<br>38<br>97<br>8 | 6.<br>76<br>60<br>7 | 2.8<br>191<br>299<br>86  | 1.4<br>952<br>5          | 2.8<br>19<br>12<br>99<br>86 | U<br>p           | 0.0<br>48<br>30<br>35<br>58 | 0.4<br>44<br>42<br>78<br>55 |
| 40<br>84       | MXD1          | MAX dimerization<br>protein 1                                              | 6.<br>02<br>06<br>5  | 5.<br>63<br>52<br>6  | 5.<br>95<br>33<br>5  | 7.<br>09<br>80<br>4 | 7.<br>93<br>11<br>4 | 6.<br>18<br>92<br>6 | 2.3<br>022<br>747<br>3   | 1.2<br>030<br>6          | 2.3<br>02<br>27<br>47<br>3  | U<br>p           | 0.0<br>27<br>77<br>85<br>05 | 0.3<br>91<br>45<br>80<br>68 |

|                           |                      |                                                                  |                     |                     |                     |                     |                     |                     |                          |                              |                             |                  |                             |                             |
|---------------------------|----------------------|------------------------------------------------------------------|---------------------|---------------------|---------------------|---------------------|---------------------|---------------------|--------------------------|------------------------------|-----------------------------|------------------|-----------------------------|-----------------------------|
| 79<br>71<br>8             | TBL1<br>XR1          | Transducin<br>( $\beta$ )-like 1 X-linked<br>receptor 1          | 6.<br>11<br>48<br>8 | 5.<br>85<br>04<br>2 | 5.<br>95<br>10<br>2 | 7.<br>45<br>99<br>3 | 7.<br>66<br>81<br>3 | 7.<br>47<br>72<br>4 | 2.9<br>546<br>624<br>74  | 1.5<br>629<br>933<br>33      | 2.9<br>54<br>66<br>24<br>74 | U<br>p           | 0.0<br>00<br>11<br>22<br>38 | 0.1<br>27<br>84<br>98<br>29 |
| 10<br>27<br>25<br>10<br>4 | LOC10<br>272510<br>4 | Coiled-coil<br>domain-containing<br>protein 29-like              | 7.<br>46<br>14<br>8 | 7.<br>42<br>23<br>2 | 7.<br>32<br>89<br>1 | 7.<br>15<br>84<br>3 | 5.<br>30<br>81<br>1 | 5.<br>41<br>93<br>7 | -2.<br>717<br>474<br>819 | -1.<br>442<br>266<br>667     | 2.7<br>17<br>47<br>48<br>19 | D<br>o<br>w<br>n | 0.0<br>22<br>22<br>55<br>45 | 0.3<br>78<br>35<br>72<br>21 |
| 73<br>51                  | UCP2                 | Uncoupling<br>protein 2<br>(mitochondrial,<br>proton carrier)    | 7.<br>59<br>61<br>2 | 7.<br>29<br>76<br>8 | 8.<br>34<br>35<br>7 | 5.<br>65<br>93<br>8 | 6.<br>65<br>32<br>9 | 6.<br>13<br>28<br>2 | -3.<br>025<br>751<br>137 | -1.<br>597<br>293<br>333     | 3.0<br>25<br>75<br>11<br>37 | D<br>o<br>w<br>n | 0.0<br>03<br>62<br>35<br>77 | 0.2<br>38<br>59<br>85<br>3  |
| 54<br>90<br>8             | SPDL1                | Spindle apparatus<br>coiled-coil protein<br>1                    | 4.<br>51<br>58<br>3 | 4.<br>03<br>37<br>8 | 4.<br>10<br>41<br>1 | 5.<br>21<br>10<br>5 | 5.<br>47<br>86<br>9 | 5.<br>59<br>87<br>8 | 2.3<br>159<br>434<br>08  | 1.2<br>116<br>94<br>34<br>08 | 2.3<br>15<br>94<br>34<br>08 | U<br>p           | 0.0<br>00<br>89<br>15<br>61 | 0.1<br>81<br>04<br>09<br>24 |
| 89<br>8                   | CCNE<br>1            | Cyclin E1                                                        | 4.<br>13<br>99<br>7 | 3.<br>83<br>85<br>2 | 4.<br>04<br>45<br>3 | 5.<br>47<br>40<br>2 | 4.<br>80<br>77<br>7 | 5.<br>11<br>49<br>6 | 2.1<br>803<br>755<br>79  | 1.1<br>245<br>766<br>67      | 2.1<br>80<br>37<br>55<br>79 | U<br>p           | 0.0<br>01<br>67<br>80<br>26 | 0.1<br>89<br>76<br>50<br>67 |
| 84<br>91                  | MAP4<br>K3           | Mitogen-activated<br>protein kinase<br>kinase kinase<br>kinase 3 | 5.<br>78<br>67<br>9 | 5.<br>54<br>28<br>6 | 5.<br>68<br>01<br>5 | 7.<br>18<br>58<br>4 | 7.<br>14<br>48<br>1 | 5.<br>72<br>99<br>3 | 2.0<br>236<br>035<br>38  | 1.0<br>169<br>266<br>67      | 2.0<br>23<br>60<br>35<br>38 | U<br>p           | 0.0<br>42<br>66<br>59<br>11 | 0.4<br>32<br>07<br>88<br>1  |
| 63<br>97<br>6             | PRDM<br>16           | PR domain<br>containing 16                                       | 4.<br>56<br>72<br>2 | 6.<br>04<br>98<br>2 | 6.<br>13<br>39<br>5 | 3.<br>62<br>40<br>4 | 4.<br>12<br>29<br>5 | 4.<br>30<br>58<br>2 | -2.<br>960<br>949<br>736 | -1.<br>566<br>06<br>333      | 2.9<br>60<br>94<br>97<br>36 | D<br>o<br>w<br>n | 0.0<br>10<br>16<br>11<br>28 | 0.3<br>18<br>26<br>13<br>04 |
| 98<br>44                  | ELMO<br>1            | Engulfment and<br>cell motility 1                                | 7.<br>47<br>43<br>3 | 6.<br>30<br>73<br>7 | 7.<br>14<br>49<br>7 | 5.<br>11<br>80<br>4 | 6.<br>45<br>57<br>8 | 6.<br>12<br>84<br>8 | -2.<br>106<br>493<br>309 | -1.<br>074<br>843<br>333     | 2.1<br>06<br>49<br>33<br>09 | D<br>o<br>w<br>n | 0.0<br>46<br>29<br>63<br>23 | 0.4<br>39<br>77<br>72<br>08 |
| 91<br>88                  | DDX2<br>1            | DEAD<br>(Asp-Glu-Ala-Asp<br>) box helicase 21                    | 4.<br>59<br>75<br>1 | 4.<br>83<br>31<br>6 | 5.<br>06<br>05<br>4 | 6.<br>21<br>28<br>9 | 6.<br>44<br>06<br>8 | 5.<br>02<br>00<br>5 | 2.0<br>860<br>927<br>94  | 1.0<br>608<br>033<br>33      | 2.0<br>86<br>09<br>27       | U<br>p           | 0.0<br>30<br>26<br>16       | 0.3<br>97<br>94<br>45       |

|                |          |                                                                 |         |          |          |          |          |          |           |           |         |                  |             |             |    |
|----------------|----------|-----------------------------------------------------------------|---------|----------|----------|----------|----------|----------|-----------|-----------|---------|------------------|-------------|-------------|----|
|                |          |                                                                 |         |          |          |          |          |          |           |           |         | 94               |             | 74          | 78 |
| 55<br>36<br>6  | LGR4     | Leucine-rich repeat containing G protein-coupled receptor 4     | 4.23019 | 4.431635 | 4.428579 | 4.487359 | 5.5011   | 5.56392  | 2.11439   | 1.08019   | 2.11439 | U<br>p           | 0.003410873 | 0.2371466   |    |
| 30<br>06<br>1  | SLC40A1  | Solute carrier family 40 (iron-regulated transporter), member 1 | 8.15468 | 8.827012 | 8.860115 | 7.725583 | 7.78423  | 5.596803 | -2.530279 | -1.339296 | 2.53027 | D<br>o<br>w<br>n | 0.023119952 | 0.380484164 |    |
| 84<br>76<br>6  | CRACR2A  | Calcium release activated channel regulator 2A                  | 6.33537 | 7.72809  | 7.737129 | 5.51101  | 5.547538 | 5.588402 | -3.149406 | -1.65508  | 3.1494  | D<br>o<br>w<br>n | 0.004682063 | 0.256554706 |    |
| 64<br>38<br>47 | PGA4     | Pepsinogen 4, group I (pepsinogen A)                            | 7.40629 | 7.750497 | 7.727612 | 6.642325 | 5.58086  | 6.58089  | -2.298660 | -1.200793 | 2.29866 | D<br>o<br>w<br>n | 0.005621345 | 0.272481795 |    |
| 79<br>96<br>2  | DNAJC22  | Dnaj heat shock protein family (Hsp40) member C22               | 7.90406 | 8.83311  | 8.821574 | 6.643078 | 6.607182 | 6.671319 | -3.293382 | -1.71957  | 3.29338 | D<br>o<br>w<br>n | 0.00192399  | 0.135279577 |    |
| 71<br>69       | TPM2     | Tropomyosin 2 ( $\beta$ )                                       | 7.0639  | 7.722424 | 7.711994 | 8.846266 | 8.896431 | 8.855642 | 2.741217  | 1.454866  | 2.74121 | U<br>p           | 0.00504078  | 0.164248294 |    |
| 62<br>9        | CFB      | Complement factor B                                             | 6.80709 | 6.665957 | 7.71744  | 5.503398 | 4.48899  | 5.5695   | -3.417307 | -1.77286  | 3.4173  | D<br>o<br>w<br>n | 0.00287057  | 0.152732    |    |
| 83<br>64<br>1  | FAM107B  | Family with sequence similarity 107 member B                    | 7.78708 | 8.898854 | 8.890984 | 7.738522 | 6.653237 | 7.70944  | -2.942705 | -1.557143 | 2.9427  | D<br>o<br>w<br>n | 0.005850672 | 0.27740275  |    |
| 94<br>79       | MAPK8IP1 | Mitogen-activated protein kinase 8 interacting protein          | 6.9884  | 7.72120  | 6.69195  | 5.55782  | 5.58753  | 6.64515  | -2.101733 | -1.07158  | 2.10173 | D<br>o<br>w      | 0.00617     | 0.28038     |    |

|                           |            |                                                 |                     |                     |                     |                     |                     |                     |                          |                          |                             |                  |                             |                             |
|---------------------------|------------|-------------------------------------------------|---------------------|---------------------|---------------------|---------------------|---------------------|---------------------|--------------------------|--------------------------|-----------------------------|------------------|-----------------------------|-----------------------------|
|                           |            | 1                                               | 6                   | 1                   | 2                   | 8                   | 9                   | 8                   | 869                      |                          | 38                          | n                | 19                          | 54                          |
|                           |            |                                                 |                     |                     |                     |                     |                     |                     |                          |                          | 69                          |                  | 39                          | 68                          |
| 93<br>69                  | NRXN<br>3  | Neurexin 3                                      | 6.<br>57<br>87      | 5.<br>05<br>3       | 5.<br>80<br>55<br>7 | 3.<br>94<br>31<br>6 | 4.<br>31<br>60<br>8 | 4.<br>38<br>68<br>7 | -3.<br>025<br>247<br>829 | -1.<br>597<br>053<br>333 | 3.0<br>25<br>24<br>78<br>29 | D<br>o<br>w<br>n | 0.0<br>04<br>62<br>82<br>22 | 0.2<br>55<br>03<br>52<br>42 |
| 64<br>1                   | BLM        | Bloom syndrome,<br>recq helicase-like           | 4.<br>67<br>44<br>4 | 4.<br>35<br>08<br>5 | 4.<br>46<br>42<br>8 | 5.<br>27<br>20<br>3 | 5.<br>91<br>68<br>2 | 5.<br>42<br>52<br>7 | 2.0<br>583<br>904<br>47  | 1.0<br>415<br>166<br>67  | 2.0<br>58<br>39<br>04<br>47 | U<br>p           | 0.0<br>03<br>12<br>83<br>11 | 0.2<br>34<br>23<br>93<br>82 |
| 80<br>70<br>5             | TSGA<br>10 | Testis specific 10                              | 5.<br>95<br>99      | 4.<br>94<br>82<br>7 | 5.<br>48<br>52<br>5 | 4.<br>93<br>38<br>4 | 3.<br>61<br>67<br>7 | 4.<br>37<br>58<br>7 | -2.<br>227<br>841<br>61  | -1.<br>155<br>646<br>667 | 2.2<br>27<br>84<br>16<br>1  | D<br>o<br>w<br>n | 0.0<br>23<br>85<br>37<br>83 | 0.3<br>81<br>50<br>64<br>9  |
| 23<br>50<br>8             | TTC9       | Tetratricopeptide<br>repeat domain 9            | 8.<br>20<br>77<br>2 | 8.<br>66<br>99<br>6 | 8.<br>74<br>87<br>2 | 5.<br>55<br>04      | 6.<br>27<br>82<br>8 | 6.<br>72<br>94<br>5 | -5.<br>119<br>809<br>036 | -2.<br>356<br>09         | 5.1<br>19<br>80<br>90<br>36 | D<br>o<br>w<br>n | 0.0<br>00<br>25<br>73<br>21 | 0.1<br>50<br>04<br>90<br>39 |
| 22<br>72                  | FHIT       | Fragile histidine<br>triad                      | 7.<br>63<br>38<br>8 | 6.<br>24<br>26<br>2 | 7.<br>71<br>33<br>8 | 6.<br>12<br>45<br>6 | 5.<br>42<br>96<br>7 | 5.<br>34<br>02<br>6 | -2.<br>959<br>041<br>643 | -1.<br>565<br>13         | 2.9<br>59<br>04<br>16<br>43 | D<br>o<br>w<br>n | 0.0<br>10<br>25<br>41<br>72 | 0.3<br>18<br>71<br>14<br>25 |
| 79<br>95<br>6             | ERMP<br>1  | Endoplasmic<br>reticulum<br>metallopeptidase 1  | 9.<br>11<br>18<br>3 | 8.<br>90<br>90<br>6 | 9.<br>29<br>52      | 8.<br>12<br>89<br>9 | 7.<br>94<br>42<br>5 | 7.<br>18<br>00<br>4 | -2.<br>556<br>677<br>163 | -1.<br>354<br>27         | 2.5<br>56<br>67<br>71<br>63 | D<br>o<br>w<br>n | 0.0<br>02<br>86<br>00<br>74 | 0.2<br>31<br>19<br>75<br>39 |
| 10<br>10<br>60<br>22<br>6 | NBPF1<br>9 | Neuroblastoma<br>breakpoint family<br>member 19 | 7.<br>77<br>63      | 7.<br>35<br>32      | 7.<br>50<br>59<br>9 | 9.<br>02<br>15<br>2 | 8.<br>39<br>94<br>5 | 8.<br>23<br>79<br>8 | 2.0<br>108<br>702<br>56  | 1.0<br>078<br>2          | 2.0<br>10<br>87<br>02<br>56 | U<br>p           | 0.0<br>08<br>35<br>33<br>07 | 0.3<br>04<br>72<br>02<br>15 |
| 76<br>78<br>46            | PFN1P<br>2 | Profilin 1<br>pseudogene 2                      | 4.<br>56<br>47<br>2 | 4.<br>54<br>17<br>8 | 4.<br>56<br>26<br>5 | 5.<br>50<br>50<br>2 | 5.<br>60<br>16<br>8 | 5.<br>75<br>35<br>5 | 2.0<br>902<br>854<br>93  | 1.0<br>637               | 2.0<br>90<br>28<br>54<br>93 | U<br>p           | 0.0<br>00<br>58<br>39<br>46 | 0.1<br>65<br>32<br>01<br>52 |
| 53                        | ACP2       | Acid phosphatase<br>2, lysosomal                | 9.<br>37            | 9.<br>50            | 9.<br>13            | 7.<br>34            | 8.<br>89            | 7.<br>90            | -2.<br>448               | -1.<br>292               | 2.4<br>48                   | D<br>o           | 0.0<br>14                   | 0.3<br>46                   |

|                |              |                                                                   |                     |                     |                     |                     |                     |                     |                          |                          |                             |                  |                             |                             |
|----------------|--------------|-------------------------------------------------------------------|---------------------|---------------------|---------------------|---------------------|---------------------|---------------------|--------------------------|--------------------------|-----------------------------|------------------|-----------------------------|-----------------------------|
|                |              |                                                                   | 73<br>4             | 20<br>8             | 86<br>2             | 60<br>7             | 06<br>8             | 51<br>8             | 735<br>02                | 036<br>667               | 73<br>50<br>2               | w<br>n           | 40<br>03<br>28              | 82<br>70<br>31              |
| 55<br>88<br>8  | ZKSC<br>AN7  | Zinc finger with<br>KRAB and SCAN<br>domains 7                    | 5.<br>34<br>60<br>4 | 5.<br>59<br>97<br>6 | 5.<br>10<br>36<br>1 | 3.<br>95<br>55      | 4.<br>39<br>29<br>7 | 4.<br>69<br>92      | -2.<br>000<br>804<br>212 | -1.<br>000<br>58         | 2.0<br>00<br>80<br>42<br>12 | D<br>o<br>w<br>n | 0.0<br>06<br>04<br>63<br>88 | 0.2<br>79<br>48<br>17<br>42 |
| 55<br>78<br>5  | FGD6         | FYVE, rhogef and<br>PH domain<br>containing 6                     | 5.<br>63<br>02<br>4 | 5.<br>34<br>09<br>3 | 5.<br>15<br>44      | 6.<br>64<br>61<br>4 | 6.<br>02<br>13<br>6 | 6.<br>58<br>20<br>3 | 2.0<br>581<br>098<br>69  | 1.0<br>413<br>2          | 2.0<br>58<br>10<br>98<br>69 | U<br>p           | 0.0<br>05<br>03<br>02<br>56 | 0.2<br>64<br>76<br>00<br>1  |
| 32<br>49       | HPN          | Hepsin                                                            | 8.<br>17<br>25<br>8 | 7.<br>46<br>26<br>8 | 7.<br>06<br>43<br>4 | 4.<br>45<br>78<br>1 | 4.<br>26<br>88<br>5 | 4.<br>38<br>57      | -9.<br>162<br>534<br>126 | -3.<br>195<br>746<br>667 | 9.1<br>62<br>53<br>41<br>26 | D<br>o<br>w<br>n | 1.8<br>16<br>94<br>E-<br>05 | 0.0<br>88<br>73<br>23<br>2  |
| 68<br>79       | TAF7         | TATA-box binding<br>protein associated<br>factor 7                | 5.<br>20<br>80<br>4 | 5.<br>08<br>67<br>2 | 5.<br>61<br>42<br>2 | 6.<br>09<br>32<br>5 | 6.<br>38<br>55<br>4 | 6.<br>61<br>36<br>3 | 2.0<br>865<br>893<br>02  | 1.0<br>611<br>466<br>67  | 2.0<br>86<br>58<br>93<br>02 | U<br>p           | 0.0<br>03<br>53<br>96<br>89 | 0.2<br>37<br>14<br>66<br>6  |
| 57<br>27       | PTCH1        | Patched 1                                                         | 4.<br>68<br>53<br>7 | 4.<br>22<br>43<br>4 | 4.<br>42<br>82<br>7 | 4.<br>93<br>64<br>4 | 6.<br>90<br>96<br>4 | 5.<br>29<br>17<br>6 | 2.4<br>059<br>722<br>45  | 1.2<br>666<br>2          | 2.4<br>05<br>97<br>22<br>45 | U<br>p           | 0.0<br>39<br>88<br>42<br>53 | 0.4<br>24<br>07<br>99<br>26 |
| 72<br>95<br>33 | FAM7<br>2A   | Family with<br>sequence<br>similarity<br>member A                 | 4.<br>81<br>14<br>4 | 3.<br>76<br>74<br>3 | 4.<br>33<br>53<br>2 | 7.<br>00<br>88<br>8 | 6.<br>35<br>93<br>6 | 5.<br>57<br>41<br>2 | 4.0<br>261<br>195<br>17  | 2.0<br>093<br>9          | 4.0<br>26<br>11<br>95<br>17 | U<br>p           | 0.0<br>02<br>23<br>84<br>85 | 0.2<br>11<br>69<br>45<br>53 |
| 38<br>86<br>77 | NOTC<br>H2NL | Notch 2<br>N-terminal like                                        | 7.<br>77<br>63      | 7.<br>35<br>32      | 7.<br>50<br>59<br>9 | 9.<br>02<br>15<br>2 | 8.<br>39<br>94<br>5 | 8.<br>23<br>79<br>8 | 2.0<br>108<br>702<br>56  | 1.0<br>078<br>2          | 2.0<br>10<br>87<br>02<br>56 | U<br>p           | 0.0<br>08<br>35<br>33<br>07 | 0.3<br>04<br>72<br>02<br>15 |
| 84<br>06<br>4  | HDHD<br>2    | Haloacid<br>dehalogenase like<br>hydrolase domain<br>containing 2 | 6.<br>15<br>50<br>3 | 6.<br>38<br>51<br>6 | 6.<br>39<br>82<br>4 | 6.<br>06<br>38<br>7 | 5.<br>41<br>58<br>3 | 4.<br>20<br>10<br>4 | -2.<br>122<br>694<br>374 | -1.<br>085<br>896<br>667 | 2.1<br>22<br>69<br>43<br>74 | D<br>o<br>w<br>n | 0.0<br>49<br>09<br>14<br>38 | 0.4<br>46<br>17<br>48       |
| 34             | DPY19        | DPY19L2                                                           | 4.                  | 3.                  | 3.                  | 4.                  | 5.                  | 5.                  | 2.8                      | 1.5                      | 2.8                         | U                | 0.0                         | 0.2                         |

|               |               |                                                      |                      |                      |                      |                     |                     |                     |                          |                          |                             |                  |                             |                             |
|---------------|---------------|------------------------------------------------------|----------------------|----------------------|----------------------|---------------------|---------------------|---------------------|--------------------------|--------------------------|-----------------------------|------------------|-----------------------------|-----------------------------|
| 91<br>52      | L2P2          | pseudogene 2                                         | 65<br>20<br>6        | 31<br>09<br>2        | 19<br>81<br>9        | 85<br>36<br>3       | 39<br>53<br>4       | 51<br>77<br>1       | 982<br>258<br>01         | 351<br>7                 | 98<br>22<br>58<br>01        | p                | 08<br>07<br>09<br>57        | 99<br>13<br>95<br>54        |
| 10<br>05<br>1 | SMC4          | Structural maintenance of chromosomes 4              | 6.<br>62<br>07<br>9  | 6.<br>61<br>98<br>7  | 6.<br>79<br>17<br>5  | 7.<br>60<br>20<br>6 | 8.<br>24<br>57      | 8.<br>15<br>66<br>6 | 2.5<br>035<br>987<br>02  | 1.3<br>240<br>033<br>33  | 2.5<br>03<br>59<br>87<br>02 | U<br>p           | 0.0<br>01<br>02<br>21<br>74 | 0.1<br>86<br>14<br>79<br>2  |
| 83<br>35      | HIST1<br>H2AB | Histone cluster 1, h2ab                              | 5.<br>31<br>81<br>5  | 4.<br>50<br>41<br>1  | 4.<br>83<br>05<br>6  | 6.<br>00<br>35<br>5 | 6.<br>56<br>12<br>3 | 5.<br>25<br>29<br>6 | 2.0<br>776<br>798<br>03  | 1.0<br>549<br>733<br>33  | 2.0<br>77<br>67<br>98<br>03 | U<br>p           | 0.0<br>28<br>26<br>04       | 0.3<br>93<br>02<br>56<br>24 |
| 57<br>40<br>2 | S100A<br>14   | S100 calcium binding protein A14                     | 5.<br>23<br>20<br>6  | 6.<br>35<br>64<br>7  | 7.<br>30<br>98<br>3  | 10<br>.2<br>09<br>7 | 8.<br>22<br>49<br>5 | 7.<br>00<br>83<br>6 | 4.5<br>364<br>067<br>4   | 2.1<br>815<br>5          | 4.5<br>36<br>40<br>67<br>4  | U<br>p           | 0.0<br>39<br>68<br>65<br>9  | 0.4<br>23<br>75<br>38<br>65 |
| 84<br>91<br>9 | PPP1R<br>15B  | Protein phosphatase 1 regulatory subunit 15B         | 5.<br>92<br>44<br>2  | 5.<br>95<br>54<br>2  | 5.<br>60<br>80<br>5  | 7.<br>37<br>14<br>5 | 6.<br>97<br>01<br>4 | 6.<br>34<br>66<br>4 | 2.0<br>947<br>527<br>96  | 1.0<br>667<br>8          | 2.0<br>94<br>75<br>27<br>96 | U<br>p           | 0.0<br>09<br>94<br>39<br>08 | 0.3<br>16<br>36<br>68<br>89 |
| 79<br>82<br>8 | METT<br>L8    | Methyltransferase like 8                             | 4.<br>91<br>07<br>2  | 4.<br>69<br>89<br>9  | 4.<br>60<br>58<br>9  | 6.<br>47<br>90<br>4 | 5.<br>77<br>63<br>5 | 5.<br>10<br>80<br>2 | 2.0<br>694<br>824<br>3   | 1.0<br>492<br>7          | 2.0<br>69<br>48<br>24<br>3  | U<br>p           | 0.0<br>21<br>08<br>46<br>77 | 0.3<br>72<br>54<br>06<br>54 |
| 26<br>38      | GC            | Group-specific component (vitamin D binding protein) | 10<br>.5<br>28<br>45 | 11<br>.3<br>07<br>36 | 12<br>.1<br>04<br>23 | 3.<br>65<br>82<br>5 | 8.<br>17<br>42<br>5 | 3.<br>33<br>64<br>6 | -76<br>.48<br>085<br>076 | -6.<br>257<br>026<br>667 | 76.<br>48<br>08<br>50<br>76 | D<br>o<br>w<br>n | 0.0<br>01<br>59<br>87<br>97 | 0.1<br>87<br>19<br>40<br>74 |
| 20<br>13      | EMP2          | Epithelial membrane protein 2                        | 6.<br>24<br>70<br>1  | 6.<br>32<br>74<br>9  | 7.<br>09<br>79<br>1  | 8.<br>06<br>44<br>9 | 8.<br>18<br>05<br>4 | 8.<br>03<br>62<br>5 | 2.9<br>004<br>766<br>4   | 1.5<br>362<br>9          | 2.9<br>00<br>47<br>66<br>4  | U<br>p           | 0.0<br>00<br>93<br>67<br>66 | 0.1<br>84<br>70<br>58<br>65 |
| 26<br>79      | GGT3<br>P     | Γ-glutamyltransferase 3 pseudogene                   | 9.<br>16<br>15<br>7  | 9.<br>31<br>31<br>4  | 8.<br>59<br>69<br>8  | 7.<br>48<br>88<br>1 | 7.<br>56<br>93<br>1 | 5.<br>95<br>58<br>1 | -4.<br>053<br>739<br>364 | -2.<br>019<br>253<br>333 | 4.0<br>53<br>73<br>93<br>64 | D<br>o<br>w<br>n | 0.0<br>03<br>67<br>15<br>27 | 0.2<br>38<br>59<br>85<br>3  |



|                |               |                                                                     |                     |                     |                     |                     |                     |                     |                          |                          |                             |                  |                             |                             |
|----------------|---------------|---------------------------------------------------------------------|---------------------|---------------------|---------------------|---------------------|---------------------|---------------------|--------------------------|--------------------------|-----------------------------|------------------|-----------------------------|-----------------------------|
| 80<br>85<br>6  | KIAA1<br>715  | KIAA1715                                                            | 4.<br>95<br>59<br>8 | 4.<br>77<br>92      | 4.<br>94<br>24<br>6 | 5.<br>51<br>39<br>6 | 6.<br>64<br>21<br>4 | 5.<br>54<br>68<br>7 | 2.0<br>117<br>392<br>64  | 1.0<br>084<br>433<br>33  | 2.0<br>11<br>73<br>92<br>64 | U<br>p           | 0.0<br>19<br>69<br>24<br>96 | 0.3<br>67<br>76<br>00<br>84 |
| 74<br>77       | WNT7<br>B     | Wingless-type<br>MMTV<br>integration site<br>family member 7B       | 5.<br>41<br>51<br>6 | 5.<br>73<br>45<br>9 | 6.<br>02<br>77<br>5 | 4.<br>85<br>88<br>2 | 4.<br>03<br>82<br>7 | 5.<br>23<br>57<br>6 | -2.<br>020<br>739<br>475 | -1.<br>014<br>883<br>333 | 2.0<br>20<br>73<br>94<br>75 | D<br>o<br>w<br>n | 0.0<br>22<br>17<br>42<br>93 | 0.3<br>78<br>35<br>72<br>21 |
| 57<br>08<br>2  | CASC<br>5     | Cancer<br>susceptibility<br>candidate 5                             | 4.<br>70<br>56<br>4 | 3.<br>56<br>58      | 4.<br>80<br>19<br>8 | 6.<br>23<br>26      | 6.<br>54<br>47<br>9 | 5.<br>66<br>16<br>3 | 3.4<br>546<br>351<br>03  | 1.7<br>885<br>333<br>33  | 3.4<br>54<br>63<br>51<br>03 | U<br>p           | 0.0<br>02<br>93<br>21<br>09 | 0.2<br>31<br>33<br>53<br>69 |
| 84<br>70       | SORB<br>S2    | Sorbin and SH3<br>domain containing<br>2                            | 6.<br>08<br>78<br>2 | 6.<br>24<br>10<br>5 | 5.<br>64<br>47<br>3 | 5.<br>45<br>49<br>5 | 3.<br>35<br>33<br>5 | 5.<br>19<br>40<br>7 | -2.<br>503<br>147<br>548 | -1.<br>323<br>743<br>333 | 2.5<br>03<br>14<br>75<br>48 | D<br>o<br>w<br>n | 0.0<br>46<br>93<br>61<br>12 | 0.4<br>41<br>20<br>29<br>14 |
| 12<br>45<br>65 | SLC38<br>A10  | Solute carrier<br>family 38, member<br>10                           | 6.<br>56<br>07<br>6 | 6.<br>79<br>05<br>4 | 6.<br>51<br>01<br>6 | 5.<br>70<br>62      | 5.<br>01<br>62<br>4 | 5.<br>99<br>32      | -2.<br>068<br>531<br>126 | -1.<br>048<br>606<br>667 | 2.0<br>68<br>53<br>11<br>26 | D<br>o<br>w<br>n | 0.0<br>09<br>16<br>93<br>56 | 0.3<br>10<br>47<br>42<br>9  |
| 83<br>46<br>1  | CDCA<br>3     | Cell division cycle<br>associated 3                                 | 5.<br>38<br>52      | 4.<br>96<br>02<br>7 | 5.<br>18<br>44<br>3 | 6.<br>83<br>95<br>9 | 7.<br>10<br>14<br>7 | 6.<br>04<br>69<br>2 | 2.8<br>011<br>644<br>18  | 1.4<br>860<br>266<br>67  | 2.8<br>01<br>16<br>44<br>18 | U<br>p           | 0.0<br>02<br>23<br>20<br>66 | 0.2<br>11<br>69<br>45<br>53 |
| 93<br>59<br>4  | TBC1<br>D31   | TBC1 domain<br>family member 31                                     | 4.<br>34<br>41<br>3 | 4.<br>09<br>35<br>1 | 4.<br>18<br>48<br>6 | 5.<br>76<br>21<br>3 | 5.<br>81<br>47<br>1 | 4.<br>30<br>99<br>3 | 2.1<br>259<br>239<br>67  | 1.0<br>880<br>9          | 2.1<br>25<br>92<br>39<br>67 | U<br>p           | 0.0<br>33<br>76<br>73<br>4  | 0.4<br>07<br>80<br>71<br>68 |
| 16<br>28       | DBP           | D site of albumin<br>promoter (albumin<br>D-box) binding<br>protein | 7.<br>95<br>61<br>2 | 8.<br>40<br>73<br>3 | 9.<br>35<br>45<br>8 | 7.<br>31<br>76<br>8 | 7.<br>59<br>52<br>9 | 7.<br>13<br>88<br>1 | -2.<br>332<br>833<br>485 | -1.<br>222<br>083<br>333 | 2.3<br>32<br>83<br>34<br>85 | D<br>o<br>w<br>n | 0.0<br>14<br>56<br>44<br>66 | 0.3<br>46<br>82<br>70<br>31 |
| 83<br>31       | HIST1<br>H2AJ | Histone cluster 1,<br>h2aj                                          | 6.<br>58<br>63<br>2 | 5.<br>47<br>89<br>7 | 5.<br>92<br>98<br>3 | 7.<br>17<br>94<br>1 | 8.<br>36<br>02<br>9 | 6.<br>75<br>66<br>3 | 2.7<br>014<br>550<br>31  | 1.4<br>337<br>366<br>67  | 2.7<br>01<br>45<br>50       | U<br>p           | 0.0<br>19<br>84<br>42       | 0.3<br>68<br>20<br>43       |

|                |              |                                                  |                      |                     |                       |                       |                     |                     |                          |                         |                             |                  |                             |                             |    |
|----------------|--------------|--------------------------------------------------|----------------------|---------------------|-----------------------|-----------------------|---------------------|---------------------|--------------------------|-------------------------|-----------------------------|------------------|-----------------------------|-----------------------------|----|
|                |              |                                                  |                      |                     |                       |                       |                     |                     |                          |                         |                             | 31               |                             | 04                          | 05 |
| 48<br>54       | NOTC<br>H3   | Notch 3                                          | 4.<br>52<br>82<br>7  | 4.<br>53<br>14<br>1 | 4.<br>64<br>51<br>4   | 5.<br>16<br>28<br>2   | 6.<br>02<br>72<br>4 | 5.<br>70<br>43<br>6 | 2.0<br>895<br>611<br>8   | 1.0<br>632              | 2.0<br>89<br>56<br>11<br>8  | U<br>p           | 0.0<br>04<br>52<br>06<br>31 | 0.2<br>53<br>69<br>15<br>42 |    |
| 31<br>75       | ONEC<br>UT1  | One cut homeobox<br>1                            | 10.<br>4<br>65<br>52 | 9.<br>57<br>93<br>7 | 10.<br>.1<br>63<br>65 | 10.<br>.2<br>22<br>92 | 6.<br>29<br>98<br>8 | 5.<br>30<br>68<br>9 | -6.<br>930<br>454<br>656 | -2.<br>792<br>95        | 6.9<br>30<br>45<br>46<br>56 | D<br>o<br>w<br>n | 0.0<br>49<br>00<br>38<br>65 | 0.4<br>46<br>17<br>48       |    |
| 67<br>78<br>00 | SNOR<br>A12  | Small nucleolar<br>RNA, H/ACA box<br>12          | 7.<br>63<br>53<br>6  | 8.<br>66<br>00<br>1 | 7.<br>86<br>33<br>6   | 8.<br>45<br>77<br>6   | 9.<br>06<br>74      | 9.<br>82<br>36<br>8 | 2.0<br>898<br>074<br>18  | 1.0<br>633<br>7         | 2.0<br>89<br>80<br>74<br>18 | U<br>p           | 0.0<br>41<br>07<br>40<br>02 | 0.4<br>26<br>78<br>72<br>82 |    |
| 94<br>93       | KIF23        | Kinesin family<br>member 23                      | 5.<br>28<br>94<br>2  | 4.<br>57<br>84<br>6 | 4.<br>92<br>32<br>6   | 6.<br>17<br>62<br>7   | 6.<br>52<br>92<br>5 | 5.<br>82<br>86<br>7 | 2.3<br>745<br>980<br>59  | 1.2<br>476<br>833<br>33 | 2.3<br>74<br>59<br>80<br>59 | U<br>p           | 0.0<br>03<br>10<br>92<br>69 | 0.2<br>34<br>23<br>93<br>82 |    |
| 57<br>57<br>3  | ZNF47<br>1   | Zinc finger protein<br>471                       | 5.<br>36<br>43<br>6  | 5.<br>81<br>05<br>2 | 6.<br>00<br>82<br>8   | 2.<br>11<br>88<br>8   | 4.<br>24<br>33      | 2.<br>50<br>38<br>7 | -6.<br>832<br>293<br>731 | -2.<br>772<br>37        | 6.8<br>32<br>29<br>37<br>31 | D<br>o<br>w<br>n | 0.0<br>01<br>38<br>37<br>08 | 0.1<br>87<br>10<br>78<br>18 |    |
| 11<br>63       | CKS1<br>B    | CDC28 protein<br>kinase regulatory<br>subunit 1B | 6.<br>51<br>89<br>5  | 6.<br>06<br>74<br>8 | 6.<br>00<br>63<br>6   | 7.<br>84<br>52<br>9   | 7.<br>14<br>8       | 6.<br>81<br>41<br>2 | 2.1<br>016<br>755<br>97  | 1.0<br>715<br>4         | 2.1<br>01<br>67<br>55<br>97 | U<br>p           | 0.0<br>12<br>45<br>94<br>41 | 0.3<br>34<br>46<br>67<br>31 |    |
| 23<br>64<br>1  | LDOC<br>1    | Leucine zipper,<br>down-regulated in<br>cancer 1 | 8.<br>21<br>36<br>1  | 7.<br>80<br>29<br>3 | 8.<br>20<br>20<br>8   | 3.<br>92<br>02<br>2   | 6.<br>02<br>96<br>7 | 4.<br>82<br>18<br>8 | -8.<br>870<br>097<br>729 | -3.<br>148<br>95        | 8.8<br>70<br>09<br>77<br>29 | D<br>o<br>w<br>n | 0.0<br>00<br>47<br>34<br>48 | 0.1<br>64<br>24<br>82<br>94 |    |
| 65<br>26<br>6  | WNK4         | WNK lysine<br>deficient protein<br>kinase 4      | 3.<br>98<br>64       | 4.<br>08<br>98<br>8 | 4.<br>60<br>04<br>2   | 4.<br>53<br>71<br>1   | 6.<br>27<br>04<br>7 | 6.<br>51<br>09<br>1 | 2.9<br>226<br>221<br>71  | 1.5<br>472<br>633<br>33 | 2.9<br>22<br>62<br>21<br>71 | U<br>p           | 0.0<br>21<br>15<br>91<br>73 | 0.3<br>72<br>54<br>06<br>54 |    |
| 24<br>59<br>73 | ATP6V<br>1C2 | Atpase, H+<br>transporting,<br>lysosomal 42kda,  | 4.<br>05<br>14       | 4.<br>78<br>88      | 4.<br>91<br>29        | 6.<br>70<br>73        | 7.<br>21<br>41      | 5.<br>13<br>98      | 3.4<br>091<br>057        | 1.7<br>693<br>933       | 3.4<br>09<br>10             | U<br>p           | 0.0<br>14<br>37             | 0.3<br>46<br>79             |    |

|                           |                       |                                                                   |                     |                      |                      |                     |                     |                     |                          |                          |                             |                  |                             |                             |
|---------------------------|-----------------------|-------------------------------------------------------------------|---------------------|----------------------|----------------------|---------------------|---------------------|---------------------|--------------------------|--------------------------|-----------------------------|------------------|-----------------------------|-----------------------------|
|                           |                       | V1 subunit C2                                                     |                     | 6                    |                      | 6                   | 3                   | 5                   | 05                       | 33                       | 57<br>05                    |                  | 99<br>75                    | 70<br>53                    |
| 55<br>63                  | PRKA<br>A2            | Protein kinase,<br>AMP-activated, $\alpha$<br>2 catalytic subunit | 5.<br>26<br>97<br>2 | 5.<br>61<br>61       | 5.<br>21<br>60<br>2  | 3.<br>70<br>68<br>9 | 3.<br>59<br>24<br>2 | 4.<br>84<br>70<br>7 | -2.<br>494<br>043<br>566 | -1.<br>318<br>486<br>667 | 2.4<br>94<br>04<br>35<br>66 | D<br>o<br>w<br>n | 0.0<br>07<br>93<br>40<br>98 | 0.2<br>99<br>13<br>95<br>54 |
| 96<br>59                  | PDE4<br>DIP           | Phosphodiesterase<br>4D interacting<br>protein                    | 4.<br>99<br>21<br>9 | 4.<br>38<br>48<br>7  | 4.<br>28<br>01<br>9  | 5.<br>74<br>22<br>8 | 5.<br>56<br>32      | 5.<br>69<br>20<br>1 | 2.1<br>635<br>693<br>03  | 1.1<br>134<br>133<br>33  | 2.1<br>63<br>56<br>93<br>03 | U<br>p           | 0.0<br>02<br>59<br>35<br>02 | 0.2<br>22<br>69<br>34<br>33 |
| 88<br>54                  | ALDH<br>1A2           | Aldehyde<br>dehydrogenase 1<br>family member A2                   | 9.<br>75<br>28<br>7 | 5.<br>26<br>81<br>3  | 7.<br>74<br>77<br>1  | 4.<br>84<br>01<br>6 | 5.<br>75<br>99<br>5 | 4.<br>16<br>97<br>8 | -6.<br>347<br>873<br>301 | -2.<br>666<br>273<br>333 | 6.3<br>47<br>87<br>33<br>01 | D<br>o<br>w<br>n | 0.0<br>40<br>62<br>71<br>01 | 0.4<br>26<br>25<br>43<br>06 |
| 65<br>98<br>5             | AACS                  | Acetoacetyl-coa<br>synthetase                                     | 5.<br>94<br>07<br>3 | 7.<br>35<br>71<br>6  | 6.<br>43<br>39<br>3  | 5.<br>08<br>01<br>3 | 4.<br>94<br>78<br>8 | 5.<br>58<br>96<br>7 | -2.<br>587<br>179<br>227 | -1.<br>371<br>38         | 2.5<br>87<br>17<br>92<br>27 | D<br>o<br>w<br>n | 0.0<br>10<br>25<br>04<br>12 | 0.3<br>18<br>71<br>14<br>25 |
| 10<br>05<br>32<br>72<br>6 | NDUF<br>C2-KC<br>TD14 | NDUFC2-KCTD1<br>4 readthrough                                     | 6.<br>56<br>54<br>9 | 8.<br>62<br>03<br>7  | 8.<br>64<br>64<br>5  | 3.<br>64<br>40<br>5 | 3.<br>83<br>58<br>3 | 5.<br>48<br>01<br>8 | -12<br>.32<br>984<br>991 | -3.<br>624<br>083<br>333 | 12.<br>32<br>98<br>49<br>91 | D<br>o<br>w<br>n | 0.0<br>01<br>42<br>99<br>44 | 0.1<br>87<br>10<br>78<br>18 |
| 38<br>65<br>93            | CHKB<br>-CPT1<br>B    | CHKB-CPT1B<br>readthrough<br>(NMD candidate)                      | 7.<br>38<br>68<br>5 | 7.<br>57<br>94<br>4  | 7.<br>26<br>70<br>7  | 6.<br>21<br>08      | 5.<br>82<br>94<br>3 | 7.<br>15<br>15<br>6 | -2.<br>019<br>301<br>965 | -1.<br>013<br>856<br>667 | 2.0<br>19<br>30<br>19<br>65 | D<br>o<br>w<br>n | 0.0<br>25<br>55<br>73<br>56 | 0.3<br>84<br>73<br>53<br>87 |
| 37<br>50<br>56            | MIA3                  | Melanoma<br>inhibitory activity<br>family member 3                | 9.<br>41<br>56<br>2 | 10<br>.7<br>18<br>65 | 10<br>.4<br>23<br>68 | 9.<br>31<br>81<br>9 | 8.<br>99<br>91<br>8 | 8.<br>99<br>51<br>4 | -2.<br>116<br>694<br>898 | -1.<br>081<br>813<br>333 | 2.1<br>16<br>69<br>48<br>98 | D<br>o<br>w<br>n | 0.0<br>20<br>36<br>33<br>18 | 0.3<br>71<br>13<br>26<br>99 |
| 22<br>25<br>84            | FAM8<br>3B            | Family with<br>sequence<br>similarity<br>member B                 | 6.<br>16<br>95<br>8 | 5.<br>50<br>11       | 5.<br>63<br>23       | 8.<br>72<br>54<br>5 | 7.<br>97<br>96<br>4 | 7.<br>35<br>13<br>9 | 4.7<br>606<br>767<br>28  | 2.2<br>511<br>666<br>67  | 4.7<br>60<br>67<br>67<br>28 | U<br>p           | 0.0<br>00<br>67<br>05<br>95 | 0.1<br>72<br>63<br>18<br>47 |
| 55<br>72                  | ASF1B                 | Anti-silencing<br>function 1B                                     | 4.<br>83            | 3.<br>98             | 4.<br>74             | 6.<br>56            | 6.<br>47            | 5.<br>27            | 2.9<br>929               | 1.5<br>815               | 2.9<br>92                   | U<br>p           | 0.0<br>06                   | 0.2<br>88                   |

|                |              |                                                  |                     |                     |                     |                     |                     |                     |                          |                          |                             |                  |                             |                             |
|----------------|--------------|--------------------------------------------------|---------------------|---------------------|---------------------|---------------------|---------------------|---------------------|--------------------------|--------------------------|-----------------------------|------------------|-----------------------------|-----------------------------|
| 3              |              | histone chaperone                                | 82<br>3             | 41<br>4             | 77<br>8             | 47<br>5             | 91<br>4             | 09                  | 053<br>75                | 466<br>67                | 90<br>53<br>75              |                  | 83<br>34<br>48              | 45<br>97<br>19              |
| 65<br>36<br>04 | HIST2<br>H3D | Histone cluster 2,<br>h3d                        | 6.<br>19<br>18<br>1 | 5.<br>50<br>18<br>7 | 5.<br>70<br>53<br>8 | 7.<br>08<br>31<br>2 | 7.<br>49<br>99<br>7 | 6.<br>87<br>60<br>8 | 2.5<br>550<br>827<br>22  | 1.3<br>533<br>7          | 2.5<br>55<br>08<br>27<br>22 | U<br>p           | 0.0<br>01<br>87<br>90<br>27 | 0.1<br>95<br>76<br>45<br>58 |
| 36<br>58       | IREB2        | Iron responsive<br>element binding<br>protein 2  | 3.<br>99<br>40<br>5 | 3.<br>92<br>82<br>5 | 4.<br>06<br>24<br>6 | 5.<br>08<br>51<br>5 | 5.<br>11<br>35<br>6 | 5.<br>15<br>39<br>3 | 2.1<br>774<br>304<br>93  | 1.1<br>226<br>266<br>67  | 2.1<br>77<br>43<br>04<br>93 | U<br>p           | 0.0<br>00<br>23<br>91<br>58 | 0.1<br>47<br>96<br>12<br>36 |
| 22<br>99<br>8  | LIMC<br>H1   | LIM and calponin<br>homology<br>domains 1        | 8.<br>23<br>21<br>4 | 7.<br>44<br>35      | 8.<br>07<br>23<br>6 | 6.<br>55<br>14<br>2 | 5.<br>65<br>82<br>4 | 5.<br>47<br>45<br>3 | -4.<br>059<br>409<br>833 | -2.<br>021<br>27         | 4.0<br>59<br>40<br>98<br>33 | D<br>o<br>w<br>n | 0.0<br>00<br>86<br>72<br>78 | 0.1<br>81<br>04<br>09<br>24 |
| 15<br>35<br>79 | BTNL<br>9    | Butyrophilin-like<br>9                           | 3.<br>35<br>09<br>9 | 4.<br>53<br>68<br>7 | 3.<br>76<br>82<br>5 | 5.<br>93<br>38<br>8 | 4.<br>64<br>60<br>7 | 4.<br>85<br>27<br>8 | 2.3<br>930<br>878<br>07  | 1.2<br>588<br>733<br>33  | 2.3<br>93<br>08<br>78<br>07 | U<br>p           | 0.0<br>22<br>77<br>86<br>94 | 0.3<br>79<br>66<br>75<br>7  |
| 70<br>53       | TGM3         | Transglutaminase<br>3                            | 6.<br>79<br>97<br>7 | 6.<br>36<br>54<br>7 | 5.<br>46<br>04<br>8 | 4.<br>90<br>38<br>3 | 4.<br>28<br>74<br>8 | 5.<br>08<br>10<br>9 | -2.<br>734<br>177<br>05  | -1.<br>451<br>106<br>667 | 2.7<br>34<br>17<br>70<br>5  | D<br>o<br>w<br>n | 0.0<br>07<br>83<br>48<br>18 | 0.2<br>99<br>13<br>95<br>54 |
| 55<br>23<br>3  | MOB1<br>A    | MOB kinase<br>activator 1A                       | 7.<br>83<br>48<br>9 | 6.<br>84<br>00<br>6 | 6.<br>97<br>99<br>6 | 8.<br>06<br>65<br>9 | 8.<br>69<br>27      | 8.<br>35<br>80<br>9 | 2.2<br>255<br>419<br>06  | 1.1<br>541<br>566<br>67  | 2.2<br>25<br>54<br>19<br>06 | U<br>p           | 0.0<br>10<br>26<br>48<br>7  | 0.3<br>18<br>79<br>03<br>09 |
| 51<br>39       | PDE3<br>A    | Phosphodiesterase<br>3A                          | 4.<br>37<br>25<br>6 | 4.<br>63<br>45<br>4 | 4.<br>31<br>60<br>8 | 4.<br>59<br>04<br>7 | 6.<br>31<br>31<br>1 | 5.<br>50<br>68<br>1 | 2.0<br>407<br>083<br>32  | 1.0<br>290<br>7          | 2.0<br>40<br>70<br>83<br>32 | U<br>p           | 0.0<br>44<br>42<br>84<br>89 | 0.4<br>35<br>14<br>07<br>99 |
| 80<br>23<br>7  | ELL3         | Elongation factor<br>RNA polymerase<br>II-like 3 | 3.<br>80<br>56<br>1 | 4.<br>50<br>55<br>4 | 4.<br>87<br>25<br>4 | 6.<br>10<br>40<br>1 | 6.<br>24<br>71<br>7 | 4.<br>70<br>20<br>8 | 2.4<br>450<br>376<br>26  | 1.2<br>898<br>566<br>67  | 2.4<br>45<br>03<br>76<br>26 | U<br>p           | 0.0<br>30<br>13<br>41<br>99 | 0.3<br>97<br>94<br>45<br>78 |
| 46             | MYB          | V-myb avian                                      | 4.                  | 5.                  | 6.                  | 6.                  | 8.                  | 7.                  | 4.7                      | 2.2                      | 4.7                         | U                | 0.0                         | 0.3                         |

|                |              |                                                                                                       |                     |                     |                     |                     |                     |                     |                          |                          |                             |                  |                             |                             |
|----------------|--------------|-------------------------------------------------------------------------------------------------------|---------------------|---------------------|---------------------|---------------------|---------------------|---------------------|--------------------------|--------------------------|-----------------------------|------------------|-----------------------------|-----------------------------|
| 02             |              | myeloblastosis<br>viral oncogene<br>homolog                                                           | 00<br>62<br>3       | 88<br>13<br>1       | 13<br>52<br>7       | 29<br>41            | 55<br>96<br>7       | 87<br>45<br>1       | 081<br>381<br>92         | 351<br>566<br>67         | 08<br>13<br>81<br>92        | p                | 20<br>06<br>33<br>66        | 70<br>15<br>38<br>07        |
| 64<br>05       | SEMA<br>3F   | Sema domain,<br>immunoglobulin<br>domain (Ig), short<br>basic domain,<br>secreted,<br>(semaphorin) 3F | 5.<br>75<br>55<br>1 | 7.<br>22<br>22<br>8 | 6.<br>92<br>35      | 5.<br>72<br>60<br>1 | 5.<br>69<br>47<br>3 | 5.<br>35<br>82<br>4 | -2.<br>057<br>325<br>403 | -1.<br>040<br>77         | 2.0<br>57<br>32<br>54<br>03 | D<br>o<br>w<br>n | 0.0<br>34<br>28<br>80<br>4  | 0.4<br>08<br>27<br>35<br>55 |
| 91             | ACVR<br>1B   | Activin A receptor<br>type IB                                                                         | 8.<br>28<br>16<br>9 | 8.<br>30<br>93<br>9 | 8.<br>46<br>81<br>1 | 6.<br>55<br>76<br>5 | 7.<br>23<br>50<br>4 | 7.<br>83<br>24<br>6 | -2.<br>210<br>970<br>843 | -1.<br>144<br>68         | 2.2<br>10<br>97<br>08<br>43 | D<br>o<br>w<br>n | 0.0<br>11<br>95<br>53<br>39 | 0.3<br>31<br>43<br>90<br>01 |
| 20             | ABCA<br>2    | ATP binding<br>cassette subfamily<br>A member 2                                                       | 8.<br>19<br>45<br>3 | 7.<br>72<br>64<br>2 | 7.<br>79<br>06<br>9 | 7.<br>17<br>71<br>9 | 6.<br>45<br>50<br>7 | 6.<br>97<br>53<br>3 | -2.<br>048<br>663<br>922 | -1.<br>034<br>683<br>333 | 2.0<br>48<br>66<br>39<br>22 | D<br>o<br>w<br>n | 0.0<br>06<br>70<br>60<br>53 | 0.2<br>87<br>91<br>07<br>42 |
| 56<br>08       | MAP2<br>K6   | Mitogen-activated<br>protein kinase<br>kinase 6                                                       | 5.<br>61<br>75<br>2 | 7.<br>08<br>42<br>4 | 7.<br>49<br>07<br>2 | 5.<br>68<br>26<br>8 | 5.<br>18<br>63<br>8 | 5.<br>29<br>36<br>7 | -2.<br>537<br>222<br>428 | -1.<br>343<br>25         | 2.5<br>37<br>22<br>24<br>28 | D<br>o<br>w<br>n | 0.0<br>27<br>45<br>40<br>47 | 0.3<br>89<br>83<br>37<br>07 |
| 59<br>51<br>01 | SMG1<br>P5   | SMG1 pseudogene<br>5                                                                                  | 5.<br>95<br>62<br>4 | 6.<br>50<br>92<br>3 | 6.<br>39<br>43<br>8 | 8.<br>01<br>35<br>7 | 7.<br>61<br>26<br>5 | 7.<br>36<br>25<br>8 | 2.5<br>960<br>472<br>95  | 1.3<br>763<br>166<br>67  | 2.5<br>96<br>04<br>72<br>95 | U<br>p           | 0.0<br>01<br>36<br>24<br>71 | 0.1<br>87<br>10<br>78<br>18 |
| 56<br>46       | PRSS3        | Protease, serine 3                                                                                    | 6.<br>85<br>99<br>7 | 6.<br>47<br>43<br>2 | 8.<br>36<br>68<br>7 | 8.<br>79<br>26<br>3 | 8.<br>63<br>16<br>9 | 7.<br>96<br>38<br>4 | 2.3<br>440<br>445<br>67  | 1.2<br>29                | 2.3<br>44<br>04<br>45<br>67 | U<br>p           | 0.0<br>48<br>42<br>41<br>2  | 0.4<br>44<br>62<br>56<br>03 |
| 20<br>03<br>16 | APOB<br>EC3F | Apolipoprotein B<br>mrna editing<br>enzyme, catalytic<br>polypeptide-like<br>3F                       | 5.<br>19<br>62      | 5.<br>08<br>68<br>8 | 5.<br>66<br>22<br>7 | 3.<br>33<br>27<br>8 | 4.<br>29<br>89<br>6 | 4.<br>78<br>31<br>6 | -2.<br>260<br>773<br>824 | -1.<br>176<br>816<br>667 | 2.2<br>60<br>77<br>38<br>24 | D<br>o<br>w<br>n | 0.0<br>18<br>91<br>93<br>52 | 0.3<br>67<br>34<br>80<br>71 |
| 78<br>02       | DNAL<br>I1   | Dynein, axonemal,<br>light intermediate<br>chain 1                                                    | 6.<br>80<br>46<br>6 | 6.<br>94<br>62<br>8 | 7.<br>31<br>63<br>5 | 3.<br>67<br>72<br>4 | 4.<br>71<br>16<br>7 | 6.<br>10<br>39<br>7 | -4.<br>567<br>706<br>65  | -2.<br>191<br>47         | 4.5<br>67<br>70<br>66       | D<br>o<br>w<br>n | 0.0<br>06<br>78<br>09       | 0.2<br>88<br>45<br>97       |

|                |             |                                                               |                     |                     |                     |                     |                     |                     |                          |                          |                             |                  |                             |                             |
|----------------|-------------|---------------------------------------------------------------|---------------------|---------------------|---------------------|---------------------|---------------------|---------------------|--------------------------|--------------------------|-----------------------------|------------------|-----------------------------|-----------------------------|
|                |             |                                                               |                     |                     |                     |                     |                     |                     |                          |                          | 5                           |                  | 62                          | 19                          |
| 70<br>27       | TFDP1       | Transcription factor Dp-1                                     | 4.<br>60<br>51<br>7 | 4.<br>60<br>74<br>8 | 4.<br>88<br>42      | 6.<br>04<br>60<br>5 | 6.<br>30<br>78<br>3 | 5.<br>68<br>5       | 2.4<br>863<br>165<br>72  | 1.3<br>140<br>1          | 2.4<br>86<br>31<br>65<br>72 | U<br>p           | 0.0<br>00<br>80<br>17<br>39 | 0.1<br>78<br>59<br>49<br>75 |
| 72<br>63       | TST         | Thiosulfate sulfurtransferase (rhodanese)                     | 8.<br>28<br>63<br>6 | 9.<br>07<br>33<br>1 | 9.<br>30<br>48      | 7.<br>92<br>41      | 7.<br>55<br>38<br>5 | 7.<br>50<br>55<br>2 | -2.<br>340<br>829<br>734 | -1.<br>227<br>02         | 2.3<br>40<br>82<br>97<br>34 | D<br>o<br>w<br>n | 0.0<br>06<br>09<br>79<br>7  | 0.2<br>79<br>48<br>17<br>42 |
| 40<br>04<br>51 | FAM1<br>74B | Family with sequence similarity 174 member B                  | 5.<br>43<br>44<br>3 | 8.<br>05<br>65<br>6 | 7.<br>26<br>08<br>1 | 5.<br>34<br>44<br>1 | 4.<br>84<br>78<br>4 | 5.<br>85<br>39<br>9 | -2.<br>966<br>002<br>883 | -1.<br>568<br>52         | 2.9<br>66<br>00<br>28<br>83 | D<br>o<br>w<br>n | 0.0<br>48<br>30<br>08<br>4  | 0.4<br>44<br>42<br>78<br>55 |
| 79<br>05<br>8  | ASPSC<br>R1 | Alveolar soft part sarcoma chromosome region, candidate 1     | 7.<br>40<br>80<br>7 | 9.<br>73<br>15<br>5 | 9.<br>01<br>96<br>7 | 7.<br>39<br>73<br>7 | 6.<br>81<br>19<br>8 | 7.<br>38<br>48<br>1 | -2.<br>871<br>311<br>793 | -1.<br>521<br>71         | 2.8<br>71<br>31<br>17<br>93 | D<br>o<br>w<br>n | 0.0<br>33<br>04<br>25<br>23 | 0.4<br>06<br>21<br>09<br>32 |
| 66<br>38       | SNRP<br>N   | Small nuclear ribonucleoprotein polypeptide N                 | 9.<br>90<br>52<br>3 | 8.<br>46<br>53<br>6 | 9.<br>54<br>75<br>4 | 7.<br>89<br>77<br>3 | 8.<br>28<br>39<br>7 | 7.<br>41<br>10<br>2 | -2.<br>716<br>602<br>22  | -1.<br>441<br>803<br>333 | 2.7<br>16<br>60<br>22<br>2  | D<br>o<br>w<br>n | 0.0<br>11<br>56<br>95<br>93 | 0.3<br>27<br>65<br>98<br>66 |
| 20<br>01       | ELF5        | E74-like factor 5 (ets domain transcription factor)           | 4.<br>31<br>00<br>4 | 8.<br>63<br>93<br>2 | 7.<br>60<br>04<br>2 | 4.<br>01<br>62<br>3 | 4.<br>02<br>41<br>8 | 4.<br>71<br>12<br>8 | -6.<br>060<br>191<br>291 | -2.<br>599<br>363<br>333 | 6.0<br>60<br>19<br>12<br>91 | D<br>o<br>w<br>n | 0.0<br>38<br>79<br>46<br>88 | 0.4<br>20<br>31<br>88<br>17 |
| 51<br>51<br>4  | DTL         | Denticleless E3 ubiquitin protein ligase homolog (Drosophila) | 3.<br>96<br>56      | 3.<br>69<br>64<br>9 | 3.<br>61<br>44<br>7 | 5.<br>31<br>65<br>6 | 5.<br>15<br>13<br>9 | 4.<br>38<br>56<br>7 | 2.2<br>852<br>521<br>11  | 1.1<br>923<br>533<br>33  | 2.2<br>85<br>25<br>21<br>11 | U<br>p           | 0.0<br>03<br>77<br>04<br>42 | 0.2<br>38<br>59<br>85<br>3  |
| 84<br>89<br>7  | TBRG<br>1   | Transforming growth factor $\beta$ regulator 1                | 7.<br>64<br>65<br>2 | 7.<br>75<br>77<br>4 | 8.<br>16<br>35<br>9 | 6.<br>15<br>17<br>4 | 6.<br>55<br>50<br>5 | 6.<br>83<br>71      | -2.<br>533<br>830<br>467 | -1.<br>341<br>32         | 2.5<br>33<br>83<br>04<br>67 | D<br>o<br>w<br>n | 0.0<br>01<br>57<br>88<br>04 | 0.1<br>87<br>10<br>78<br>18 |
| 27<br>44       | GLS         | Glutaminase                                                   | 5.<br>69<br>23      | 4.<br>51<br>71      | 4.<br>35<br>58      | 5.<br>37<br>93      | 7.<br>91<br>98      | 6.<br>24<br>07      | 3.1<br>561<br>373        | 1.6<br>581<br>6          | 3.1<br>56<br>13             | U<br>p           | 0.0<br>43<br>97             | 0.4<br>33<br>73             |

|                           |             |                                                                 |                      |                     |                     |                     |                     |                     |                          |                          |                             |                  |                             |                             |
|---------------------------|-------------|-----------------------------------------------------------------|----------------------|---------------------|---------------------|---------------------|---------------------|---------------------|--------------------------|--------------------------|-----------------------------|------------------|-----------------------------|-----------------------------|
|                           |             |                                                                 | 2                    | 8                   | 6                   | 2                   |                     | 2                   | 71                       |                          | 73                          |                  | 38                          | 23                          |
|                           |             |                                                                 |                      |                     |                     |                     |                     |                     |                          |                          | 71                          |                  | 09                          | 05                          |
| 53<br>65                  | PLXN<br>B3  | Plexin B3                                                       | 6.<br>07<br>25       | 6.<br>96<br>18      | 6.<br>77<br>51<br>9 | 5.<br>98<br>50<br>7 | 5.<br>25<br>26<br>6 | 5.<br>44<br>68<br>9 | -2.<br>058<br>542<br>641 | -1.<br>041<br>623<br>333 | 2.0<br>58<br>54<br>26<br>41 | D<br>o<br>w<br>n | 0.0<br>14<br>37<br>94<br>49 | 0.3<br>46<br>79<br>70<br>53 |
| 84<br>95                  | PPFIB<br>P2 | PTPRF interacting protein, binding protein 2 (liprin $\beta$ 2) | 10<br>.0<br>19<br>24 | 9.<br>69<br>79      | 9.<br>71<br>04<br>1 | 7.<br>98<br>12      | 8.<br>69<br>56<br>4 | 8.<br>47<br>92<br>4 | -2.<br>682<br>955<br>886 | -1.<br>423<br>823<br>333 | 2.6<br>82<br>95<br>58<br>86 | D<br>o<br>w<br>n | 0.0<br>00<br>92<br>21<br>79 | 0.1<br>82<br>88<br>63<br>95 |
| 92<br>60                  | PDLI<br>M7  | PDZ and LIM domain 7                                            | 7.<br>22<br>59<br>9  | 6.<br>27<br>31      | 6.<br>61<br>72      | 7.<br>15<br>38<br>1 | 8.<br>04<br>95<br>7 | 9.<br>46<br>88<br>8 | 2.8<br>652<br>413<br>48  | 1.5<br>186<br>566<br>67  | 2.8<br>65<br>24<br>13<br>48 | U<br>p           | 0.0<br>35<br>78<br>15<br>07 | 0.4<br>12<br>27<br>05<br>35 |
| 37<br>60                  | KCNJ3       | Potassium channel, inwardly rectifying subfamily J, member 3    | 4.<br>92<br>74<br>6  | 4.<br>83<br>67<br>4 | 4.<br>79<br>56<br>1 | 6.<br>01<br>69<br>3 | 7.<br>41<br>71<br>9 | 5.<br>83<br>86<br>1 | 2.9<br>710<br>509<br>24  | 1.5<br>709<br>733<br>33  | 2.9<br>71<br>05<br>09<br>24 | U<br>p           | 0.0<br>07<br>38<br>44<br>17 | 0.2<br>92<br>72<br>51<br>41 |
| 23<br>28<br>6             | WWC1        | WW and C2 domain containing 1                                   | 7.<br>90<br>61<br>5  | 7.<br>90<br>93<br>3 | 7.<br>99<br>82      | 5.<br>75<br>59<br>1 | 6.<br>69<br>33<br>8 | 7.<br>46<br>79<br>3 | -2.<br>460<br>275<br>71  | -1.<br>298<br>82         | 2.4<br>60<br>27<br>57<br>1  | D<br>o<br>w<br>n | 0.0<br>17<br>71<br>00<br>08 | 0.3<br>61<br>12<br>33<br>37 |
| 10<br>01<br>32<br>40<br>3 | FAM1<br>57B | Family with sequence similarity 157 member B                    | 8.<br>27<br>78<br>2  | 8.<br>11<br>34<br>5 | 7.<br>66<br>23<br>9 | 5.<br>84<br>47<br>6 | 5.<br>87<br>11<br>1 | 6.<br>62<br>62<br>8 | -3.<br>742<br>070<br>312 | -1.<br>903<br>836<br>667 | 3.7<br>42<br>07<br>03<br>12 | D<br>o<br>w<br>n | 0.0<br>00<br>42<br>62<br>53 | 0.1<br>63<br>37<br>87<br>34 |
| 73<br>36                  | UBE2<br>V2  | Ubiquitin conjugating enzyme E2 variant 2                       | 5.<br>90<br>65<br>9  | 5.<br>80<br>49<br>3 | 5.<br>62<br>52<br>7 | 7.<br>14<br>00<br>2 | 7.<br>51<br>02<br>6 | 5.<br>97<br>02<br>6 | 2.1<br>363<br>726<br>7   | 1.0<br>951<br>633<br>33  | 2.1<br>36<br>37<br>26<br>7  | U<br>p           | 0.0<br>30<br>02<br>14<br>55 | 0.3<br>97<br>94<br>45<br>78 |
| 10<br>28<br>3             | CWC2<br>7   | CWC27 spliceosome-associated protein homolog                    | 5.<br>70<br>80<br>8  | 7.<br>65<br>85<br>2 | 9.<br>22<br>24<br>6 | 5.<br>67<br>27<br>8 | 5.<br>28<br>84      | 5.<br>58<br>86      | -4.<br>036<br>467<br>661 | -2.<br>013<br>093<br>333 | 4.0<br>36<br>46<br>76<br>61 | D<br>o<br>w<br>n | 0.0<br>40<br>12<br>69<br>4  | 0.4<br>24<br>74<br>11<br>08 |
| 11<br>23                  | SEC63       | SEC63 homolog, protein                                          | 6.<br>01             | 6.<br>28            | 5.<br>88            | 4.<br>81            | 5.<br>63            | 4.<br>74            | -2.<br>004               | -1.<br>003               | 2.0<br>04                   | D<br>o           | 0.0<br>11                   | 0.3<br>27                   |

|               |               |                                                                                     |                     |                     |                     |                     |                     |                     |                          |                                    |                             |                  |                             |                             |
|---------------|---------------|-------------------------------------------------------------------------------------|---------------------|---------------------|---------------------|---------------------|---------------------|---------------------|--------------------------|------------------------------------|-----------------------------|------------------|-----------------------------|-----------------------------|
| 1             |               | translocation<br>regulator                                                          | 47<br>9             | 90<br>3             | 82<br>7             | 04<br>2             | 02<br>4             | 23<br>2             | 214<br>147               | 036<br>667                         | 21<br>41<br>47              | w<br>n           | 42<br>30<br>56              | 65<br>98<br>66              |
| 66<br>46      | SOAT1         | Sterol<br>O-acyltransferase<br>1                                                    | 7.<br>46<br>27<br>2 | 7.<br>17<br>02<br>3 | 7.<br>30<br>98<br>9 | 6.<br>13<br>90<br>4 | 6.<br>37<br>65<br>4 | 6.<br>17<br>77<br>2 | -2.<br>118<br>700<br>996 | -1.<br>083<br>18<br>70<br>09<br>96 | 2.1<br>18<br>70<br>09<br>96 | D<br>o<br>w<br>n | 0.0<br>01<br>12<br>69<br>49 | 0.1<br>86<br>14<br>79<br>2  |
| 57<br>16<br>2 | PELI1         | Pellino E3<br>ubiquitin protein<br>ligase 1                                         | 6.<br>38<br>52<br>6 | 6.<br>57<br>16<br>9 | 6.<br>57<br>79<br>7 | 7.<br>56<br>46<br>4 | 8.<br>25<br>86<br>2 | 7.<br>29<br>33<br>7 | 2.2<br>877<br>086<br>55  | 1.1<br>939<br>033<br>33            | 2.2<br>87<br>70<br>86<br>55 | U<br>p           | 0.0<br>04<br>60<br>17<br>05 | 0.2<br>54<br>41<br>63<br>12 |
| 84<br>45<br>6 | L3MB<br>TL3   | L(3)mbt-like 3<br>(Drosophila)                                                      | 4.<br>36<br>51<br>6 | 3.<br>67<br>54<br>3 | 3.<br>95<br>68<br>6 | 5.<br>11<br>05      | 5.<br>34<br>09<br>3 | 4.<br>71<br>98<br>8 | 2.0<br>819<br>758<br>49  | 1.0<br>579<br>533<br>33            | 2.0<br>81<br>97<br>58<br>49 | U<br>p           | 0.0<br>04<br>77<br>89<br>53 | 0.2<br>60<br>26<br>39<br>27 |
| 88<br>63      | PER3          | Period circadian<br>clock 3                                                         | 7.<br>11<br>57<br>9 | 8.<br>05<br>90<br>6 | 9.<br>30<br>43<br>9 | 4.<br>81<br>46<br>7 | 7.<br>62<br>00<br>6 | 5.<br>44<br>57<br>9 | -4.<br>593<br>434<br>744 | -2.<br>199<br>573<br>333           | 4.5<br>93<br>43<br>47<br>44 | D<br>o<br>w<br>n | 0.0<br>32<br>67<br>22<br>31 | 0.4<br>04<br>71<br>37<br>9  |
| 71<br>71      | TPM4          | Tropomyosin 4                                                                       | 8.<br>12<br>47<br>7 | 8.<br>27<br>37<br>6 | 8.<br>21<br>57<br>1 | 9.<br>35<br>46<br>6 | 9.<br>61<br>41      | 9.<br>63<br>35<br>8 | 2.5<br>129<br>233<br>51  | 1.3<br>293<br>666<br>67            | 2.5<br>12<br>92<br>33<br>51 | U<br>p           | 0.0<br>00<br>31<br>04<br>71 | 0.1<br>57<br>71<br>83<br>51 |
| 30<br>17      | HIST1<br>H2BD | Histone cluster 1,<br>h2bd                                                          | 7.<br>73<br>83      | 7.<br>93<br>24<br>7 | 7.<br>74<br>25<br>4 | 9.<br>91<br>24<br>4 | 8.<br>75<br>06<br>3 | 8.<br>55<br>74<br>1 | 2.4<br>100<br>392<br>9   | 1.2<br>690<br>566<br>67            | 2.4<br>10<br>03<br>92<br>9  | U<br>p           | 0.0<br>11<br>80<br>74       | 0.3<br>29<br>50<br>23<br>79 |
| 96<br>58      | ZNF51<br>6    | Zinc finger protein<br>516                                                          | 9.<br>02<br>18<br>7 | 7.<br>85<br>45<br>7 | 8.<br>16<br>40<br>5 | 7.<br>65<br>16<br>2 | 7.<br>04<br>83<br>8 | 6.<br>74<br>13<br>4 | -2.<br>296<br>945<br>565 | -1.<br>199<br>716<br>667           | 2.2<br>96<br>94<br>55<br>65 | D<br>o<br>w<br>n | 0.0<br>16<br>63<br>82<br>23 | 0.3<br>56<br>68<br>17<br>47 |
| 26<br>28      | GATM          | Glycine<br>amidinotransferase<br>(L-arginine:glycin<br>e<br>amidinotransferase<br>) | 8.<br>39<br>33<br>7 | 9.<br>88<br>98<br>9 | 9.<br>66<br>98<br>1 | 4.<br>19<br>95<br>1 | 6.<br>98<br>87<br>4 | 8.<br>72<br>15<br>2 | -6.<br>413<br>432<br>348 | -2.<br>681<br>096<br>667           | 6.4<br>13<br>43<br>23<br>48 | D<br>o<br>w<br>n | 0.0<br>42<br>06<br>31<br>54 | 0.4<br>30<br>12<br>48<br>54 |



|                |             |                                                                               |                     |                     |                     |                     |                     |                     |                          |                          |                             |                  |                             |                             |
|----------------|-------------|-------------------------------------------------------------------------------|---------------------|---------------------|---------------------|---------------------|---------------------|---------------------|--------------------------|--------------------------|-----------------------------|------------------|-----------------------------|-----------------------------|
| 64<br>82       | ST3G<br>AL1 | ST3 $\beta$ -galactoside<br>$\alpha$ -2,3-sialyltransfer<br>ase 1             | 9.<br>04<br>54<br>7 | 6.<br>21<br>98<br>4 | 7.<br>83<br>12<br>8 | 4.<br>77<br>61      | 6.<br>08<br>99<br>7 | 4.<br>97<br>05<br>8 | -5.<br>351<br>636<br>029 | -2.<br>419<br>98         | 5.3<br>51<br>63<br>60<br>29 | D<br>o<br>w<br>n | 0.0<br>12<br>17<br>39<br>41 | 0.3<br>33<br>39<br>53<br>91 |
| 11<br>04<br>1  | B4GA<br>T1  | B-1,4-glucuronyltr<br>ansferase 1                                             | 5.<br>73<br>03<br>5 | 6.<br>48<br>38<br>5 | 6.<br>58<br>66<br>8 | 4.<br>72<br>28<br>7 | 5.<br>27<br>78<br>8 | 4.<br>99<br>28<br>2 | -2.<br>410<br>117<br>249 | -1.<br>269<br>103<br>333 | 2.4<br>10<br>11<br>72<br>49 | D<br>o<br>w<br>n | 0.0<br>03<br>80<br>74<br>08 | 0.2<br>38<br>90<br>72<br>74 |
| 25<br>38<br>27 | MSRB<br>3   | Methionine<br>sulfoxide<br>reductase B3                                       | 4.<br>34<br>28<br>6 | 4.<br>14<br>37      | 3.<br>63<br>73<br>4 | 5.<br>01<br>77      | 6.<br>99<br>15<br>4 | 5.<br>82<br>52      | 3.7<br>412<br>317<br>43  | 1.9<br>035<br>133<br>33  | 3.7<br>41<br>23<br>17<br>43 | U<br>p           | 0.0<br>06<br>32<br>24<br>13 | 0.2<br>83<br>73<br>24<br>96 |
| 14<br>8        | ADRA<br>1A  | Adrenoceptor $\alpha$<br>1A                                                   | 7.<br>77<br>71<br>8 | 8.<br>27<br>51<br>7 | 7.<br>29<br>98<br>6 | 5.<br>97<br>78<br>9 | 6.<br>42<br>55<br>4 | 7.<br>13<br>91<br>8 | -2.<br>411<br>392<br>785 | -1.<br>269<br>866<br>667 | 2.4<br>11<br>39<br>27<br>85 | D<br>o<br>w<br>n | 0.0<br>12<br>90<br>79<br>16 | 0.3<br>36<br>17<br>41<br>55 |
| 59<br>23       | RASG<br>RF1 | Ras protein<br>specific guanine<br>nucleotide<br>releasing factor 1           | 4.<br>37<br>97<br>3 | 8.<br>87<br>27<br>7 | 8.<br>67<br>84<br>5 | 4.<br>60<br>23<br>8 | 4.<br>06<br>56<br>7 | 4.<br>62<br>49      | -7.<br>358<br>100<br>255 | -2.<br>879<br>333<br>333 | 7.3<br>58<br>10<br>02<br>55 | D<br>o<br>w<br>n | 0.0<br>39<br>41<br>33<br>54 | 0.4<br>22<br>68<br>46<br>91 |
| 11<br>22<br>8  | RASSF<br>8  | Ras association<br>(ralgds/AF-6)<br>domain family<br>(N-terminal)<br>member 8 | 8.<br>63<br>31<br>1 | 7.<br>78<br>59<br>2 | 8.<br>60<br>61<br>1 | 6.<br>90<br>51<br>7 | 7.<br>79<br>32<br>5 | 6.<br>57<br>26<br>6 | -2.<br>380<br>646<br>37  | -1.<br>251<br>353<br>333 | 2.3<br>80<br>64<br>63<br>7  | D<br>o<br>w<br>n | 0.0<br>15<br>89<br>99<br>19 | 0.3<br>51<br>31<br>08<br>12 |
| 41<br>51<br>17 | STX19       | Syntaxin 19                                                                   | 5.<br>25<br>29      | 5.<br>36<br>12<br>6 | 4.<br>67<br>56<br>6 | 6.<br>70<br>97<br>7 | 5.<br>97<br>39<br>4 | 6.<br>14<br>54<br>2 | 2.2<br>654<br>065<br>82  | 1.1<br>797<br>7          | 2.2<br>65<br>40<br>65<br>82 | U<br>p           | 0.0<br>05<br>22<br>50<br>35 | 0.2<br>66<br>84<br>56<br>14 |
| 10<br>61<br>2  | TRIM3       | Tripartite motif<br>containing 3                                              | 5.<br>65<br>48<br>6 | 7.<br>23<br>41<br>6 | 7.<br>05<br>61      | 4.<br>01<br>99<br>3 | 5.<br>45<br>06<br>1 | 4.<br>88<br>33<br>9 | -3.<br>639<br>474<br>106 | -1.<br>863<br>73         | 3.6<br>39<br>47<br>41<br>06 | D<br>o<br>w<br>n | 0.0<br>09<br>51<br>06<br>19 | 0.3<br>13<br>03<br>31<br>69 |
| 85<br>47<br>7  | SCIN        | Scinderin                                                                     | 4.<br>98<br>64<br>9 | 4.<br>58<br>10<br>6 | 4.<br>88<br>42      | 5.<br>32<br>82<br>8 | 7.<br>48<br>71      | 6.<br>40<br>99<br>1 | 3.0<br>129<br>568<br>26  | 1.5<br>911<br>8          | 3.0<br>12<br>95<br>68       | U<br>p           | 0.0<br>17<br>65<br>60       | 0.3<br>61<br>12<br>33       |

|               |               |                                                                                         |                     |                     |                     |                     |                     |                     |                          |                          |                             |                  |                             |                             |    |
|---------------|---------------|-----------------------------------------------------------------------------------------|---------------------|---------------------|---------------------|---------------------|---------------------|---------------------|--------------------------|--------------------------|-----------------------------|------------------|-----------------------------|-----------------------------|----|
|               |               |                                                                                         |                     |                     |                     |                     |                     |                     |                          |                          |                             | 26               |                             | 1                           | 37 |
| 84<br>07      | TAGL<br>N2    | Transgelin 2                                                                            | 7.<br>19<br>62<br>8 | 6.<br>72<br>16<br>8 | 7.<br>60<br>38<br>5 | 8.<br>97<br>21<br>3 | 8.<br>04<br>17<br>9 | 7.<br>65<br>97      | 2.0<br>713<br>959<br>22  | 1.0<br>506<br>033<br>33  | 2.0<br>71<br>39<br>59<br>22 | U<br>p           | 0.0<br>34<br>26<br>87<br>6  | 0.4<br>08<br>27<br>35<br>55 |    |
| 79<br>77<br>2 | MCTP<br>1     | Multiple C2<br>domains,<br>transmembrane 1                                              | 5.<br>63<br>52<br>6 | 6.<br>39<br>28<br>4 | 6.<br>49<br>29<br>5 | 3.<br>55<br>16<br>1 | 5.<br>62<br>79<br>8 | 4.<br>78<br>13<br>8 | -2.<br>867<br>963<br>507 | -1.<br>520<br>026<br>667 | 2.8<br>67<br>96<br>35<br>07 | D<br>o<br>w<br>n | 0.0<br>24<br>62<br>49<br>06 | 0.3<br>83<br>13<br>18<br>63 |    |
| 79<br>93<br>2 | KIAA0<br>319L | KIAA0319-like                                                                           | 8.<br>28<br>17      | 9.<br>05<br>91<br>8 | 8.<br>81<br>00<br>5 | 7.<br>91<br>39<br>1 | 7.<br>13<br>64<br>5 | 7.<br>82<br>14<br>3 | -2.<br>133<br>240<br>564 | -1.<br>093<br>046<br>667 | 2.1<br>33<br>24<br>05<br>64 | D<br>o<br>w<br>n | 0.0<br>10<br>67<br>15<br>19 | 0.3<br>23<br>69<br>99<br>74 |    |
| 81<br>88<br>8 | HYI           | Hydroxypyruvate<br>isomerase<br>(putative)                                              | 7.<br>47<br>97<br>4 | 8.<br>25<br>03<br>3 | 6.<br>80<br>77<br>4 | 5.<br>43<br>82<br>9 | 6.<br>56<br>22      | 6.<br>45<br>86<br>2 | -2.<br>566<br>080<br>922 | -1.<br>359<br>566<br>667 | 2.5<br>66<br>08<br>09<br>22 | D<br>o<br>w<br>n | 0.0<br>20<br>85<br>14<br>86 | 0.3<br>71<br>99<br>34<br>38 |    |
| 78<br>51      | MALL          | Mal, T-cell<br>differentiation<br>protein-like                                          | 7.<br>63<br>57<br>2 | 7.<br>33<br>66<br>1 | 7.<br>26<br>30<br>4 | 8.<br>49<br>80<br>4 | 9.<br>69<br>81<br>5 | 8.<br>63<br>86<br>2 | 2.8<br>941<br>639<br>82  | 1.5<br>331<br>466<br>67  | 2.8<br>94<br>16<br>39<br>82 | U<br>p           | 0.0<br>03<br>48<br>49<br>67 | 0.2<br>37<br>14<br>66<br>6  |    |
| 84<br>13<br>3 | ZNRF3         | Zinc and ring<br>finger 3                                                               | 4.<br>72<br>30<br>8 | 7.<br>40<br>18<br>4 | 7.<br>03<br>18      | 4.<br>65<br>60<br>6 | 5.<br>11<br>24<br>9 | 4.<br>01<br>75<br>8 | -3.<br>458<br>620<br>369 | -1.<br>790<br>196<br>667 | 3.4<br>58<br>62<br>03<br>69 | D<br>o<br>w<br>n | 0.0<br>38<br>66<br>38<br>21 | 0.4<br>19<br>70<br>54<br>36 |    |
| 31<br>92      | HNRN<br>PU    | Heterogeneous<br>nuclear<br>ribonucleoprotein<br>U (scaffold<br>attachment factor<br>A) | 6.<br>65<br>39<br>9 | 7.<br>69<br>93<br>5 | 7.<br>51<br>70<br>9 | 9.<br>05<br>40<br>7 | 8.<br>41<br>20<br>3 | 8.<br>60<br>65<br>3 | 2.6<br>403<br>575<br>95  | 1.4<br>007<br>333<br>33  | 2.6<br>40<br>35<br>75<br>95 | U<br>p           | 0.0<br>04<br>54<br>07<br>03 | 0.2<br>53<br>79<br>21<br>57 |    |
| 49<br>25      | NUCB<br>2     | Nucleobindin 2                                                                          | 4.<br>56<br>50<br>4 | 7.<br>37<br>47<br>1 | 6.<br>14<br>17<br>8 | 3.<br>40<br>91      | 4.<br>32<br>73<br>3 | 3.<br>62<br>24      | -4.<br>726<br>918<br>531 | -2.<br>240<br>9          | 4.7<br>26<br>91<br>85<br>31 | D<br>o<br>w<br>n | 0.0<br>12<br>82<br>10<br>7  | 0.3<br>36<br>17<br>41<br>55 |    |
| 23<br>78      | APOL<br>2     | Apolipoprotein L,<br>2                                                                  | 7.<br>01            | 7.<br>34            | 7.<br>78            | 6.<br>30            | 6.<br>45            | 6.<br>03            | -2.<br>168               | -1.<br>116               | 2.1<br>68                   | D<br>o           | 0.0<br>04                   | 0.2<br>48                   |    |

|                           |                      |                                                       |                     |                     |                     |                     |                     |                     |                          |                          |                             |                  |                             |                             |
|---------------------------|----------------------|-------------------------------------------------------|---------------------|---------------------|---------------------|---------------------|---------------------|---------------------|--------------------------|--------------------------|-----------------------------|------------------|-----------------------------|-----------------------------|
| 0                         |                      |                                                       | 47<br>3             | 05<br>7             | 99<br>1             | 96<br>9             | 18<br>3             | 43<br>8             | 108<br>065               | 436<br>667               | 10<br>80<br>65              | w<br>n           | 32<br>43<br>24              | 58<br>48<br>05              |
| 11<br>48<br>97            | C1QT<br>NF1          | C1q and tumor<br>necrosis factor<br>related protein 1 | 6.<br>27<br>20<br>8 | 6.<br>94<br>91<br>7 | 7.<br>75<br>53      | 5.<br>46<br>09<br>9 | 6.<br>38<br>64<br>2 | 5.<br>97<br>61<br>1 | -2.<br>071<br>979<br>889 | -1.<br>051<br>01         | 2.0<br>71<br>97<br>98<br>89 | D<br>o<br>w<br>n | 0.0<br>43<br>24<br>37<br>06 | 0.4<br>32<br>33<br>09<br>01 |
| 55<br>76<br>1             | TTC17                | Tetratricopeptide<br>repeat domain 17                 | 4.<br>96<br>24      | 5.<br>50<br>06<br>8 | 5.<br>53<br>37<br>4 | 3.<br>84<br>79<br>4 | 4.<br>80<br>00<br>5 | 4.<br>28<br>30<br>2 | -2.<br>030<br>643<br>056 | -1.<br>021<br>936<br>667 | 2.0<br>30<br>64<br>30<br>56 | D<br>o<br>w<br>n | 0.0<br>11<br>67<br>76<br>91 | 0.3<br>28<br>47<br>02<br>47 |
| 89<br>1                   | CCNB<br>1            | Cyclin B1                                             | 4.<br>60<br>32<br>5 | 3.<br>97<br>06<br>7 | 4.<br>07<br>72<br>8 | 5.<br>96<br>88<br>4 | 6.<br>64<br>54<br>7 | 5.<br>29<br>32<br>3 | 3.3<br>685<br>164<br>24  | 1.7<br>521<br>133<br>33  | 3.3<br>68<br>51<br>64<br>24 | U<br>p           | 0.0<br>02<br>26<br>00<br>76 | 0.2<br>11<br>69<br>45<br>53 |
| 10<br>44                  | CDX1                 | Caudal type<br>homeobox 1                             | 5.<br>10<br>28<br>2 | 5.<br>38<br>07<br>5 | 5.<br>76<br>32<br>7 | 5.<br>53<br>19<br>2 | 8.<br>24<br>57      | 7.<br>28<br>60<br>9 | 3.0<br>432<br>721<br>04  | 1.6<br>056<br>233<br>33  | 3.0<br>43<br>27<br>21<br>04 | U<br>p           | 0.0<br>42<br>48<br>66<br>52 | 0.4<br>31<br>73<br>19<br>52 |
| 29<br>52                  | GSTT1                | Glutathione<br>S-transferase theta<br>1               | 6.<br>42<br>06<br>6 | 6.<br>86<br>61<br>8 | 6.<br>89<br>34<br>9 | 3.<br>84<br>26<br>4 | 5.<br>56<br>36<br>3 | 5.<br>91<br>78<br>5 | -3.<br>071<br>059<br>931 | -1.<br>618<br>736<br>667 | 3.0<br>71<br>05<br>99<br>31 | D<br>o<br>w<br>n | 0.0<br>19<br>04<br>14<br>98 | 0.3<br>67<br>48<br>02<br>31 |
| 10<br>01<br>32<br>06<br>2 | LOC10<br>013206<br>2 | Uncharacterized<br>LOC100132062                       | 8.<br>03<br>35<br>9 | 8.<br>30<br>84<br>8 | 7.<br>49<br>20<br>1 | 5.<br>71<br>04<br>9 | 6.<br>09<br>29<br>7 | 7.<br>81<br>82<br>4 | -2.<br>646<br>575<br>235 | -1.<br>404<br>126<br>667 | 2.6<br>46<br>57<br>52<br>35 | D<br>o<br>w<br>n | 0.0<br>40<br>05<br>82<br>98 | 0.4<br>24<br>35<br>94<br>44 |
| 23<br>34                  | AFF2                 | AF4/FMR2 family<br>member 2                           | 7.<br>18<br>61<br>4 | 5.<br>53<br>66<br>1 | 7.<br>12<br>26<br>9 | 5.<br>24<br>52<br>4 | 4.<br>32<br>63<br>2 | 4.<br>72<br>61<br>5 | -3.<br>603<br>111<br>59  | -1.<br>849<br>243<br>333 | 3.6<br>03<br>11<br>15<br>9  | D<br>o<br>w<br>n | 0.0<br>07<br>12<br>25<br>31 | 0.2<br>89<br>31<br>65<br>01 |
| 89<br>0                   | CCNA<br>2            | Cyclin A2                                             | 6.<br>11<br>44<br>7 | 5.<br>72<br>92<br>6 | 6.<br>21<br>28<br>3 | 8.<br>34<br>77<br>6 | 8.<br>41<br>06<br>2 | 6.<br>88<br>91<br>4 | 3.6<br>392<br>807<br>05  | 1.8<br>636<br>533<br>33  | 3.6<br>39<br>28<br>07<br>05 | U<br>p           | 0.0<br>03<br>72<br>67<br>98 | 0.2<br>38<br>59<br>85<br>3  |
| 23                        | CADM                 | Cell adhesion                                         | 8.                  | 9.                  | 8.                  | 6.                  | 7.                  | 6.                  | -3.                      | -1.                      | 3.9                         | D                | 0.0                         | 0.1                         |

|                |              |                                                        |                     |                     |                     |                     |                     |                     |                          |                          |                             |                  |                             |                             |
|----------------|--------------|--------------------------------------------------------|---------------------|---------------------|---------------------|---------------------|---------------------|---------------------|--------------------------|--------------------------|-----------------------------|------------------|-----------------------------|-----------------------------|
| 70<br>5        | 1            | molecule 1                                             | 45<br>34            | 13<br>85<br>4       | 68<br>47<br>2       | 37<br>07            | 05<br>01<br>8       | 92<br>27<br>5       | 938<br>582<br>967        | 977<br>676<br>667        | 38<br>58<br>29<br>67        | o<br>w<br>n      | 00<br>25<br>00<br>13        | 47<br>99<br>60<br>59        |
| 37<br>43<br>54 | NHLR<br>C2   | NHL repeat<br>containing 2                             | 4.<br>24<br>10<br>9 | 5.<br>14<br>11<br>7 | 4.<br>13<br>58<br>1 | 5.<br>75<br>35      | 5.<br>62<br>35<br>8 | 5.<br>45<br>08      | 2.1<br>484<br>109<br>8   | 1.1<br>032<br>7          | 2.1<br>48<br>41<br>09<br>8  | U<br>p           | 0.0<br>08<br>40<br>42<br>19 | 0.3<br>05<br>72<br>10<br>78 |
| 10<br>52<br>5  | HYOU<br>1    | Hypoxia<br>up-regulated 1                              | 8.<br>59<br>97<br>5 | 9.<br>28<br>00<br>2 | 8.<br>30<br>73<br>1 | 7.<br>43<br>68<br>1 | 7.<br>82<br>67<br>4 | 7.<br>17<br>55<br>9 | -2.<br>377<br>282<br>467 | -1.<br>249<br>313<br>333 | 2.3<br>77<br>28<br>24<br>67 | D<br>o<br>w<br>n | 0.0<br>06<br>09<br>77<br>75 | 0.2<br>79<br>48<br>17<br>42 |
| 17<br>06<br>88 | NUDT<br>4P2  | Nudix hydrolase 4<br>pseudogene 2                      | 5.<br>90<br>68<br>7 | 4.<br>50<br>84<br>1 | 5.<br>12<br>77      | 3.<br>52<br>15<br>6 | 4.<br>35<br>53<br>6 | 3.<br>47<br>68<br>2 | -2.<br>632<br>463<br>145 | -1.<br>396<br>413<br>333 | 2.6<br>32<br>46<br>31<br>45 | D<br>o<br>w<br>n | 0.0<br>11<br>24<br>71<br>44 | 0.3<br>24<br>85<br>44<br>65 |
| 12<br>69<br>61 | HIST2<br>H3C | Histone cluster 2,<br>h3c                              | 6.<br>19<br>18<br>1 | 5.<br>50<br>18<br>7 | 5.<br>70<br>53<br>8 | 7.<br>08<br>31<br>2 | 7.<br>49<br>99<br>7 | 6.<br>87<br>60<br>8 | 2.5<br>550<br>827<br>22  | 1.3<br>533<br>7          | 2.5<br>55<br>08<br>27<br>22 | U<br>p           | 0.0<br>01<br>87<br>90<br>27 | 0.1<br>95<br>76<br>45<br>58 |
| 10<br>48<br>4  | SEC23<br>A   | Sec23 homolog A,<br>COPII coat<br>complex<br>component | 5.<br>12<br>73<br>6 | 4.<br>54<br>74<br>3 | 4.<br>73<br>79<br>5 | 5.<br>39<br>27<br>3 | 6.<br>49<br>22      | 5.<br>73<br>12      | 2.0<br>962<br>294<br>88  | 1.0<br>677<br>966<br>67  | 2.0<br>96<br>22<br>94<br>88 | U<br>p           | 0.0<br>14<br>27<br>65<br>78 | 0.3<br>46<br>79<br>70<br>53 |
| 57<br>67<br>4  | RNF21<br>3   | Ring finger<br>protein 213                             | 7.<br>78<br>22<br>2 | 5.<br>94<br>97<br>4 | 6.<br>87<br>27<br>9 | 5.<br>62<br>19<br>6 | 5.<br>76<br>09<br>1 | 5.<br>84<br>66      | -2.<br>181<br>156<br>568 | -1.<br>125<br>093<br>333 | 2.1<br>81<br>15<br>65<br>68 | D<br>o<br>w<br>n | 0.0<br>39<br>47<br>55<br>39 | 0.4<br>22<br>88<br>72<br>64 |
| 55<br>58       | PRIM2        | Primase, DNA,<br>polypeptide 2<br>(58kda)              | 4.<br>41<br>41<br>5 | 4.<br>31<br>94<br>7 | 4.<br>47<br>67<br>9 | 5.<br>37<br>27<br>9 | 5.<br>91<br>26<br>7 | 5.<br>29<br>05<br>7 | 2.1<br>762<br>586<br>01  | 1.1<br>218<br>5          | 2.1<br>76<br>25<br>86<br>01 | U<br>p           | 0.0<br>01<br>68<br>56<br>63 | 0.1<br>89<br>79<br>01<br>16 |
| 33<br>2        | BIRC5        | Baculoviral IAP<br>repeat containing 5                 | 4.<br>10<br>13<br>1 | 3.<br>69<br>62<br>2 | 3.<br>72<br>51<br>2 | 4.<br>91<br>08<br>1 | 5.<br>13<br>26<br>4 | 4.<br>72<br>60<br>1 | 2.1<br>173<br>650<br>17  | 1.0<br>822<br>7          | 2.1<br>17<br>36<br>50<br>17 | U<br>p           | 0.0<br>01<br>17<br>49<br>54 | 0.1<br>86<br>14<br>79<br>2  |

|                           |             |                                                            |                      |                     |                     |                     |                      |                      |                          |                          |                             |                  |                             |                             |
|---------------------------|-------------|------------------------------------------------------------|----------------------|---------------------|---------------------|---------------------|----------------------|----------------------|--------------------------|--------------------------|-----------------------------|------------------|-----------------------------|-----------------------------|
| 39<br>64                  | LGAL<br>S8  | Lectin,<br>galactoside-binding,<br>soluble, 8              | 7.<br>98<br>93<br>7  | 7.<br>25<br>59<br>3 | 7.<br>43<br>25<br>6 | 8.<br>90<br>59<br>7 | 8.<br>43<br>86<br>9  | 8.<br>88<br>18<br>1  | 2.2<br>702<br>796<br>22  | 1.1<br>828<br>7          | 2.2<br>70<br>27<br>96<br>22 | U<br>p           | 0.0<br>03<br>70<br>58<br>62 | 0.2<br>38<br>59<br>85<br>3  |
| 11<br>00<br>4             | KIF2C       | Kinesin family<br>member 2C                                | 5.<br>61<br>13<br>6  | 5.<br>34<br>19<br>8 | 5.<br>21<br>71<br>1 | 6.<br>62<br>02<br>2 | 7.<br>49<br>07<br>6  | 6.<br>00<br>83<br>5  | 2.4<br>902<br>547<br>46  | 1.3<br>162<br>933<br>33  | 2.4<br>90<br>25<br>47<br>46 | U<br>p           | 0.0<br>11<br>21<br>49<br>73 | 0.3<br>24<br>75<br>12<br>86 |
| 91<br>76<br>8             | CABL<br>ES1 | Cdk5 and Abl<br>enzyme substrate 1                         | 6.<br>20<br>59<br>5  | 7.<br>56<br>37<br>4 | 7.<br>60<br>85<br>1 | 5.<br>54<br>87<br>2 | 6.<br>12<br>29<br>3  | 4.<br>88<br>73<br>05 | -3.<br>044<br>946<br>05  | -1.<br>606<br>416<br>667 | 3.0<br>44<br>94<br>60<br>5  | D<br>o<br>w<br>n | 0.0<br>12<br>36<br>27<br>71 | 0.3<br>34<br>46<br>67<br>31 |
| 23<br>64<br>7             | ARFIP<br>2  | ADP ribosylation<br>factor interacting<br>protein 2        | 7.<br>37<br>99<br>8  | 9.<br>03<br>09<br>3 | 8.<br>65<br>21<br>7 | 6.<br>63<br>41<br>5 | 7.<br>07<br>53<br>6  | 7.<br>17<br>96<br>9  | -2.<br>623<br>137<br>319 | -1.<br>391<br>293<br>333 | 2.6<br>23<br>13<br>73<br>19 | D<br>o<br>w<br>n | 0.0<br>16<br>26<br>57<br>89 | 0.3<br>53<br>90<br>90<br>69 |
| 10<br>00<br>08<br>58<br>6 | GAGE<br>12F | G antigen 12F                                              | 4.<br>52<br>15<br>8  | 4.<br>21<br>77<br>2 | 4.<br>33<br>54<br>7 | 4.<br>46<br>90<br>8 | 6.<br>30<br>03<br>5  | 5.<br>69<br>14<br>3  | 2.1<br>866<br>111<br>21  | 1.1<br>286<br>966<br>67  | 2.1<br>86<br>61<br>11<br>21 | U<br>p           | 0.0<br>39<br>74<br>28<br>51 | 0.4<br>23<br>82<br>07<br>35 |
| 39<br>09<br>27            | ZNF79<br>3  | Zinc finger protein<br>793                                 | 5.<br>71<br>37<br>5  | 6.<br>03<br>88<br>7 | 6.<br>14<br>50<br>6 | 3.<br>19<br>67<br>6 | 4.<br>08<br>85<br>4  | 4.<br>83<br>45<br>5  | -3.<br>799<br>852<br>277 | -1.<br>925<br>943<br>333 | 3.7<br>99<br>85<br>22<br>77 | D<br>o<br>w<br>n | 0.0<br>02<br>24<br>47<br>57 | 0.2<br>11<br>69<br>45<br>53 |
| 29<br>10<br>3             | DNAJ<br>C15 | Dnaj heat shock<br>protein family<br>(Hsp40) member<br>C15 | 6.<br>50<br>56<br>6  | 6.<br>92<br>54<br>7 | 7.<br>22<br>43<br>9 | 8.<br>33<br>57<br>8 | 8.<br>09<br>31<br>9  | 7.<br>28<br>98<br>6  | 2.0<br>294<br>704<br>49  | 1.0<br>211<br>033<br>33  | 2.0<br>29<br>47<br>04<br>49 | U<br>p           | 0.0<br>20<br>67<br>03<br>44 | 0.3<br>71<br>59<br>28<br>73 |
| 83<br>98                  | PLA2<br>G6  | Phospholipase A2<br>group VI                               | 7.<br>69<br>86<br>6  | 8.<br>00<br>67<br>3 | 7.<br>88<br>23<br>7 | 6.<br>78<br>61<br>2 | 6.<br>12<br>87<br>3  | 6.<br>95<br>07<br>9  | -2.<br>363<br>142<br>563 | -1.<br>240<br>706<br>667 | 2.3<br>63<br>14<br>25<br>63 | D<br>o<br>w<br>n | 0.0<br>02<br>80<br>68<br>24 | 0.2<br>29<br>42<br>21<br>97 |
| 40<br>69<br>91            | MIR21       | Microrna 21                                                | 10<br>.3<br>57<br>36 | 8.<br>72<br>93<br>9 | 8.<br>29<br>67<br>3 | 9.<br>88<br>90<br>4 | 11<br>.2<br>73<br>32 | 11<br>.7<br>47<br>19 | 3.5<br>851<br>247<br>82  | 1.8<br>420<br>233<br>33  | 3.5<br>85<br>12<br>47       | U<br>p           | 0.0<br>27<br>73<br>97       | 0.3<br>91<br>44<br>86       |

|                           |                      |                                                      |                     |                     |                     |                      |                     |                     |                          |                          |                             |                  |                             |                             |    |
|---------------------------|----------------------|------------------------------------------------------|---------------------|---------------------|---------------------|----------------------|---------------------|---------------------|--------------------------|--------------------------|-----------------------------|------------------|-----------------------------|-----------------------------|----|
|                           |                      |                                                      |                     |                     |                     |                      |                     |                     |                          |                          |                             | 82               |                             | 72                          | 74 |
| 59<br>47                  | RBP1                 | Retinol binding protein 1                            | 5.<br>78<br>79<br>3 | 5.<br>71<br>53<br>9 | 6.<br>10<br>58<br>5 | 4.<br>72<br>33<br>7  | 4.<br>29<br>62<br>9 | 4.<br>30<br>40<br>7 | -2.<br>691<br>629<br>802 | -1.<br>428<br>48         | 2.6<br>91<br>62<br>98<br>02 | D<br>o<br>w<br>n | 0.0<br>00<br>36<br>30<br>43 | 0.1<br>60<br>90<br>15<br>41 |    |
| 10<br>27<br>25<br>07<br>0 | LOC10<br>272507<br>0 | Coiled-coil domain-containing protein 29-like        | 7.<br>46<br>14<br>8 | 7.<br>42<br>23<br>2 | 7.<br>32<br>89<br>1 | 7.<br>15<br>84<br>3  | 5.<br>30<br>81<br>1 | 5.<br>41<br>93<br>7 | -2.<br>717<br>474<br>819 | -1.<br>442<br>266<br>667 | 2.7<br>17<br>47<br>48<br>19 | D<br>o<br>w<br>n | 0.0<br>22<br>22<br>55<br>45 | 0.3<br>78<br>35<br>72<br>21 |    |
| 91<br>39<br>2             | ZNF50<br>2           | Zinc finger protein 502                              | 4.<br>38<br>98<br>4 | 4.<br>70<br>66<br>6 | 4.<br>91<br>55<br>9 | 2.<br>65<br>19       | 4.<br>33<br>49<br>4 | 3.<br>85<br>34<br>6 | -2.<br>080<br>980<br>337 | -1.<br>057<br>263<br>333 | 2.0<br>80<br>98<br>03<br>37 | D<br>o<br>w<br>n | 0.0<br>42<br>01<br>31<br>98 | 0.4<br>30<br>07<br>43<br>46 |    |
| 14<br>52<br>26            | RDH1<br>2            | Retinol dehydrogenase 12 (all-trans/9-cis/11-cis)    | 9.<br>62<br>38<br>2 | 6.<br>82<br>06<br>9 | 7.<br>36<br>95      | 5.<br>06<br>80<br>6  | 3.<br>43<br>82<br>2 | 3.<br>12<br>92<br>4 | -16<br>.67<br>363<br>399 | -4.<br>059<br>496<br>667 | 16.<br>67<br>36<br>33<br>99 | D<br>o<br>w<br>n | 0.0<br>01<br>65<br>79<br>17 | 0.1<br>88<br>84<br>30<br>44 |    |
| 38<br>95<br>49            | FEZF1                | FEZ family zinc finger 1                             | 4.<br>28<br>47      | 5.<br>04<br>37<br>1 | 4.<br>51<br>59<br>5 | 4.<br>91<br>13<br>5  | 6.<br>48<br>55<br>1 | 5.<br>54<br>17<br>6 | 2.0<br>440<br>351<br>42  | 1.0<br>314<br>2          | 2.0<br>44<br>03<br>51<br>42 | U<br>p           | 0.0<br>45<br>18<br>53<br>48 | 0.4<br>36<br>31<br>89<br>27 |    |
| 51<br>31<br>6             | PLAC8                | Placenta specific 8                                  | 6.<br>65<br>62<br>6 | 6.<br>81<br>46<br>2 | 6.<br>73<br>31<br>8 | 10<br>.7<br>52<br>82 | 8.<br>87<br>16<br>8 | 8.<br>41<br>42<br>8 | 6.1<br>115<br>853<br>58  | 2.6<br>115<br>466<br>67  | 6.1<br>11<br>58<br>53<br>58 | U<br>p           | 0.0<br>02<br>74<br>49<br>48 | 0.2<br>28<br>17<br>52<br>85 |    |
| 55<br>22                  | PPP2R<br>2C          | Protein phosphatase 2 regulatory subunit B, $\gamma$ | 7.<br>20<br>97<br>5 | 7.<br>13<br>16<br>1 | 7.<br>38<br>80<br>5 | 5.<br>16<br>33<br>3  | 4.<br>71<br>16<br>7 | 5.<br>47<br>47      | -4.<br>366<br>780<br>456 | -2.<br>126<br>57         | 4.3<br>66<br>78<br>04<br>56 | D<br>o<br>w<br>n | 7.3<br>67<br>56<br>E-<br>05 | 0.1<br>26<br>50<br>89<br>75 |    |
| 81<br>61<br>1             | ANP32<br>E           | Acidic nuclear phosphoprotein 32 family member E     | 3.<br>99<br>43<br>2 | 3.<br>76<br>96      | 3.<br>72<br>19<br>2 | 5.<br>79<br>80<br>3  | 5.<br>80<br>18<br>2 | 4.<br>96<br>05<br>6 | 3.2<br>299<br>757<br>5   | 1.6<br>915<br>233<br>33  | 3.2<br>29<br>97<br>57<br>5  | U<br>p           | 0.0<br>00<br>47<br>98<br>28 | 0.1<br>64<br>24<br>82<br>94 |    |
| 10<br>20<br>7             | INAD<br>L            | Inad-like (Drosophila)                               | 9.<br>10<br>30      | 9.<br>27<br>04      | 9.<br>21<br>02      | 7.<br>56<br>99       | 8.<br>43<br>61      | 8.<br>31<br>45      | -2.<br>125<br>354        | -1.<br>087<br>703        | 2.1<br>25<br>35             | D<br>o<br>w      | 0.0<br>06<br>10             | 0.2<br>79<br>48             |    |

|       |          |                                                     |         |         |         |         |         |         |              |              |             |                  |           |           |
|-------|----------|-----------------------------------------------------|---------|---------|---------|---------|---------|---------|--------------|--------------|-------------|------------------|-----------|-----------|
|       |          |                                                     | 1       | 9       | 1       | 3       | 4       | 3       | 259          | 333          | 42          | n                | 73        | 17        |
|       |          |                                                     |         |         |         |         |         |         |              |              | 59          |                  | 28        | 42        |
| 8000  | GREB1L   | Growth regulation by estrogen in breast cancer-like | 3.88982 | 4.35786 | 3.74856 | 5.29267 | 5.37609 | 4.39307 | 2.0305398    | 1.0218633    | 2.0305398   | U<br>p           | 0.0151703 | 0.3486795 |
| 5641  | LGMN     | Legumain                                            | 9.56945 | 8.36808 | 8.45817 | 7.64993 | 8.02681 | 7.54063 | -2.084127202 | -1.059443333 | 2.084127202 | D<br>o<br>w<br>n | 0.0231654 | 0.3807539 |
| 23258 | DENN D5A | DENN/MADD domain containing 5A                      | 7.64196 | 7.85285 | 7.68905 | 6.15586 | 7.12656 | 6.67614 | -2.106868104 | -1.075186    | 2.106868104 | D<br>o<br>w<br>n | 0.0072825 | 0.2921866 |
| 9414  | TJP2     | Tight junction protein 2                            | 5.86359 | 6.32315 | 6.67934 | 7.69486 | 7.16826 | 7.47177 | 2.228804383  | 1.15627      | 2.228804383 | U<br>p           | 0.0047098 | 0.257322  |
| 57713 | SFMB T2  | Scm-like with four mbt domains 2                    | 5.371   | 5.93145 | 6.32842 | 4.41827 | 5.06401 | 4.25361 | -2.459434557 | -1.298326667 | 2.44557     | D<br>o<br>w<br>n | 0.0058241 | 0.2764811 |
| 25840 | METT L7A | Methyltransferase like 7A                           | 8.45009 | 6.64329 | 7.38071 | 5.88887 | 6.79481 | 5.77059 | -2.531407907 | -1.33994     | 2.531407907 | D<br>o<br>w<br>n | 0.0326532 | 0.4047137 |
| 301   | ANXA1    | Annexin A1                                          | 6.61871 | 4.46937 | 3.0406  | 7.70733 | 6.74465 | 6.66218 | 5.022805233  | 2.3284933    | 5.022805233 | U<br>p           | 0.0291484 | 0.3946382 |
| 83481 | EPPK1    | Epiplakin 1                                         | 5.68675 | 4.54679 | 5.1423  | 7.06081 | 6.58291 | 5.55289 | 2.417624189  | 1.27359      | 2.417624189 | U<br>p           | 0.0273296 | 0.3898307 |
| 8836  | GGH      | Γ-glutamyl hydrolase                                | 3.56    | 5.09    | 4.456   | 5.23    | 6.01    | 5.37    | 2.1898       | 1.1308       | 2.1898      | U<br>p           | 0.031     | 0.401     |

|                           |       |                                                                    |                     |                     |                     |                     |                     |                     |                          |                          |                             |                  |                             |                             |
|---------------------------|-------|--------------------------------------------------------------------|---------------------|---------------------|---------------------|---------------------|---------------------|---------------------|--------------------------|--------------------------|-----------------------------|------------------|-----------------------------|-----------------------------|
|                           |       | (conjugase, folylpolyyglutamyl hydrolase)                          | 76<br>5             | 44<br>8             | 47<br>2             | 19<br>6             | 67<br>2             | 07<br>2             | 772<br>44                | 5                        | 87<br>72<br>44              |                  | 61<br>03<br>18              | 56<br>52<br>84              |
| 22<br>84<br>9             | CPEB3 | Cytoplasmic polyadenylation element binding protein 3              | 5.<br>88<br>18<br>9 | 6.<br>46<br>85<br>3 | 6.<br>11<br>09<br>5 | 5.<br>60<br>42<br>3 | 4.<br>28<br>61<br>9 | 5.<br>15<br>09<br>8 | -2.<br>203<br>794<br>956 | -1.<br>139<br>99         | 2.2<br>03<br>79<br>49<br>56 | D<br>o<br>w<br>n | 0.0<br>17<br>34<br>33<br>55 | 0.3<br>60<br>38<br>98<br>23 |
| 13<br>75                  | CPT1B | Carnitine palmitoyltransferase 1B                                  | 7.<br>38<br>68<br>5 | 7.<br>57<br>94<br>4 | 7.<br>26<br>70<br>7 | 6.<br>21<br>08      | 5.<br>82<br>94<br>3 | 7.<br>15<br>15<br>6 | -2.<br>019<br>301<br>965 | -1.<br>013<br>856<br>667 | 2.0<br>19<br>30<br>19<br>65 | D<br>o<br>w<br>n | 0.0<br>25<br>55<br>73<br>56 | 0.3<br>84<br>73<br>53<br>87 |
| 10<br>05<br>06<br>96<br>5 | PWAR6 | Prader Willi/Angelman region RNA 6                                 | 6.<br>75<br>90<br>6 | 5.<br>45<br>54      | 5.<br>96<br>89<br>9 | 5.<br>67<br>82<br>5 | 4.<br>57<br>90<br>1 | 4.<br>49<br>24<br>5 | -2.<br>210<br>817<br>596 | -1.<br>144<br>58         | 2.2<br>10<br>81<br>75<br>96 | D<br>o<br>w<br>n | 0.0<br>37<br>20<br>82<br>31 | 0.4<br>15<br>71<br>63<br>29 |
| 38<br>38                  | KPNA2 | Karyopherin $\alpha$ 2 (RAG cohort 1, importin $\alpha$ 1)         | 6.<br>28<br>76<br>3 | 5.<br>64<br>95<br>5 | 6.<br>57<br>03<br>2 | 7.<br>70<br>07<br>1 | 6.<br>81<br>67<br>2 | 8.<br>66<br>05<br>8 | 2.9<br>420<br>803<br>88  | 1.5<br>568<br>366<br>67  | 2.9<br>42<br>08<br>03<br>88 | U<br>p           | 0.0<br>15<br>83<br>26<br>02 | 0.3<br>51<br>16<br>74<br>61 |
| 26<br>58<br>6             | CKAP2 | Cytoskeleton associated protein 2                                  | 5.<br>71<br>83<br>5 | 5.<br>25<br>08<br>9 | 5.<br>51<br>43<br>8 | 6.<br>90<br>23<br>5 | 7.<br>67<br>21<br>6 | 6.<br>47<br>90<br>7 | 2.8<br>745<br>178<br>71  | 1.5<br>233<br>2          | 2.8<br>74<br>51<br>78<br>71 | U<br>p           | 0.0<br>02<br>85<br>82<br>48 | 0.2<br>31<br>19<br>75<br>39 |
| 26<br>57<br>6             | SRPK3 | SRSF protein kinase 3                                              | 6.<br>07<br>25      | 6.<br>96<br>18      | 6.<br>77<br>51<br>9 | 5.<br>98<br>50<br>7 | 5.<br>25<br>26<br>6 | 5.<br>44<br>68<br>9 | -2.<br>058<br>542<br>641 | -1.<br>041<br>623<br>333 | 2.0<br>58<br>54<br>26<br>41 | D<br>o<br>w<br>n | 0.0<br>14<br>37<br>94<br>49 | 0.3<br>46<br>79<br>70<br>53 |
| 80<br>03<br>6             | TRPM3 | Transient receptor potential cation channel, subfamily M, member 3 | 8.<br>73<br>67<br>5 | 6.<br>88<br>99<br>4 | 6.<br>71<br>80<br>3 | 4.<br>74<br>51<br>8 | 4.<br>78<br>31<br>6 | 5.<br>06<br>99<br>5 | -5.<br>988<br>286<br>86  | -2.<br>582<br>143<br>333 | 5.9<br>88<br>28<br>68<br>6  | D<br>o<br>w<br>n | 0.0<br>01<br>85<br>09<br>42 | 0.1<br>94<br>39<br>36<br>87 |
| 17<br>42                  | DLG4  | Discs, large homolog 4 (Drosophila)                                | 5.<br>53<br>13<br>6 | 6.<br>43<br>92<br>4 | 6.<br>53<br>29<br>4 | 4.<br>61<br>91<br>3 | 5.<br>14<br>13<br>7 | 5.<br>03<br>11<br>4 | -2.<br>357<br>569<br>007 | -1.<br>237<br>3          | 2.3<br>57<br>56<br>90<br>07 | D<br>o<br>w<br>n | 0.0<br>06<br>63<br>85<br>02 | 0.2<br>86<br>90<br>22<br>62 |
| 32                        | HOXB  | Homeobox B5                                                        | 4.                  | 4.                  | 3.                  | 6.                  | 5.                  | 7.                  | 4.9                      | 2.3                      | 4.9                         | U                | 0.0                         | 0.2                         |



|                           |                      |                                                                         |                     |                     |                     |                     |                     |                     |                          |                          |                             |                  |                                   |                             |
|---------------------------|----------------------|-------------------------------------------------------------------------|---------------------|---------------------|---------------------|---------------------|---------------------|---------------------|--------------------------|--------------------------|-----------------------------|------------------|-----------------------------------|-----------------------------|
| 15                        | 5                    |                                                                         | 11<br>50<br>7       | 43<br>20<br>7       | 73<br>59<br>9       | 65<br>62<br>6       | 11<br>67<br>4       | 43<br>18<br>8       | 493<br>875<br>04         | 072<br>5                 | 49<br>38<br>75<br>04        | p                | 04<br>80<br>47<br>92              | 60<br>26<br>39<br>27        |
| 39<br>99<br>48            | COLC<br>A1           | Colorectal cancer<br>associated 1                                       | 7.<br>35<br>66<br>1 | 8.<br>51<br>73<br>6 | 8.<br>06<br>85<br>8 | 6.<br>57<br>92<br>9 | 6.<br>35<br>47<br>7 | 7.<br>38<br>86<br>1 | -2.<br>307<br>973<br>512 | -1.<br>206<br>626<br>667 | 2.3<br>07<br>97<br>35<br>12 | D<br>o<br>w<br>n | 0.0<br>18<br>99<br>77<br>34<br>71 | 0.3<br>67<br>34<br>80<br>71 |
| 16<br>63<br>36            | PRICK<br>LE2         | Prickle homolog 2                                                       | 5.<br>79<br>76<br>9 | 5.<br>83<br>65<br>5 | 5.<br>64<br>17<br>4 | 4.<br>08<br>26<br>4 | 5.<br>46<br>48<br>8 | 4.<br>44<br>20<br>9 | -2.<br>136<br>787<br>34  | -1.<br>095<br>443<br>333 | 2.1<br>36<br>78<br>73<br>4  | D<br>o<br>w<br>n | 0.0<br>19<br>27<br>61<br>24       | 0.3<br>67<br>66<br>41<br>57 |
| 63<br>95<br>1             | DMRT<br>A1           | DMRT-like family<br>A1                                                  | 6.<br>36<br>78      | 6.<br>07<br>76<br>3 | 5.<br>92<br>03<br>1 | 4.<br>21<br>01<br>9 | 3.<br>13<br>54<br>2 | 3.<br>94<br>13<br>8 | -5.<br>132<br>221<br>133 | -2.<br>359<br>583<br>333 | 5.1<br>32<br>22<br>11<br>33 | D<br>o<br>w<br>n | 0.0<br>00<br>13<br>95<br>48       | 0.1<br>27<br>84<br>98<br>29 |
| 55<br>65                  | PRKA<br>B2           | Protein kinase,<br>AMP-activated, $\beta$<br>2 non-catalytic<br>subunit | 5.<br>18<br>94<br>8 | 5.<br>58<br>69<br>6 | 5.<br>66<br>51<br>8 | 7.<br>19<br>94<br>7 | 6.<br>96<br>37<br>6 | 5.<br>56<br>57<br>1 | 2.1<br>372<br>761<br>61  | 1.0<br>957<br>733<br>33  | 2.1<br>37<br>27<br>61<br>61 | U<br>p           | 0.0<br>42<br>66<br>30<br>42       | 0.4<br>32<br>07<br>88<br>1  |
| 28<br>46<br>11            | FAM1<br>02B          | Family with<br>sequence<br>similarity 102<br>member B                   | 4.<br>00<br>20<br>1 | 3.<br>86<br>63<br>2 | 4.<br>28<br>83<br>2 | 5.<br>07<br>92<br>8 | 5.<br>62<br>69<br>4 | 4.<br>45<br>67<br>4 | 2.0<br>029<br>179<br>66  | 1.0<br>021<br>033<br>33  | 2.0<br>02<br>91<br>79<br>66 | U<br>p           | 0.0<br>15<br>98<br>37<br>64       | 0.3<br>51<br>41<br>79<br>34 |
| 10<br>02<br>88<br>63<br>7 | LOC10<br>028863<br>7 | OTU<br>deubiquitinase 7A<br>pseudogene                                  | 5.<br>86<br>99<br>6 | 5.<br>53<br>95<br>7 | 6.<br>22<br>91<br>2 | 7.<br>63<br>44<br>8 | 7.<br>95<br>97<br>7 | 7.<br>54<br>28<br>6 | 3.5<br>623<br>271<br>16  | 1.8<br>328<br>2          | 3.5<br>62<br>32<br>71<br>16 | U<br>p           | 0.0<br>00<br>19<br>91<br>65       | 0.1<br>35<br>27<br>95<br>77 |
| 57<br>57<br>1             | CARN<br>S1           | Carnosine<br>synthase 1                                                 | 6.<br>13<br>55<br>6 | 5.<br>29<br>59<br>8 | 5.<br>43<br>76<br>4 | 4.<br>42<br>16<br>4 | 4.<br>05<br>10<br>8 | 5.<br>12<br>71<br>5 | -2.<br>128<br>401<br>02  | -1.<br>089<br>77         | 2.1<br>28<br>40<br>10<br>2  | D<br>o<br>w<br>n | 0.0<br>17<br>99<br>40<br>69       | 0.3<br>62<br>48<br>76<br>38 |
| 34<br>72<br>52            | IGFBP<br>L1          | Insulin like growth<br>factor binding<br>protein-like 1                 | 5.<br>99<br>26<br>6 | 6.<br>38<br>12<br>2 | 6.<br>54<br>93<br>1 | 3.<br>45<br>06<br>4 | 3.<br>98<br>86<br>4 | 4.<br>02<br>87<br>5 | -5.<br>598<br>550<br>425 | -2.<br>485<br>053<br>333 | 5.5<br>98<br>55<br>04<br>25 | D<br>o<br>w<br>n | 2.6<br>14<br>53<br>E-<br>05       | 0.0<br>96<br>05<br>29<br>42 |

|                |              |                                                           |                     |                     |                     |                      |                     |                     |                          |                          |                             |                  |                             |                             |
|----------------|--------------|-----------------------------------------------------------|---------------------|---------------------|---------------------|----------------------|---------------------|---------------------|--------------------------|--------------------------|-----------------------------|------------------|-----------------------------|-----------------------------|
| 55<br>75<br>2  | SEPT1<br>1   | Septin 11                                                 | 6.<br>52<br>04<br>9 | 5.<br>85<br>04<br>2 | 6.<br>48<br>17<br>5 | 7.<br>72<br>14<br>7  | 8.<br>33<br>10<br>4 | 6.<br>48<br>30<br>7 | 2.3<br>418<br>359<br>24  | 1.2<br>276<br>4          | 2.3<br>41<br>83<br>59<br>24 | U<br>p           | 0.0<br>38<br>48<br>83<br>7  | 0.4<br>19<br>34<br>43<br>95 |
| 67<br>64       | ST5          | Suppression of tumorigenicity 5                           | 8.<br>94<br>69<br>4 | 9.<br>34<br>06<br>5 | 9.<br>20<br>51<br>4 | 7.<br>64<br>76<br>8  | 8.<br>39<br>35<br>8 | 7.<br>83<br>72<br>7 | -2.<br>304<br>946<br>61  | -1.<br>204<br>733<br>333 | 2.3<br>04<br>94<br>66<br>1  | D<br>o<br>w<br>n | 0.0<br>02<br>81<br>76<br>87 | 0.2<br>29<br>82<br>09<br>33 |
| 40<br>33<br>13 | PLPP6        | Phospholipid phosphatase 6                                | 5.<br>98<br>74<br>5 | 7.<br>05<br>8       | 6.<br>38<br>99<br>5 | 5.<br>52<br>72<br>8  | 5.<br>59<br>16<br>9 | 4.<br>95<br>56<br>7 | -2.<br>173<br>851<br>414 | -1.<br>120<br>253<br>333 | 2.1<br>73<br>85<br>14<br>14 | D<br>o<br>w<br>n | 0.0<br>12<br>60<br>69<br>63 | 0.3<br>35<br>59<br>55<br>01 |
| 52<br>68       | SERPI<br>NB5 | Serpin peptidase inhibitor, clade B (ovalbumin), member 5 | 4.<br>29<br>79<br>3 | 5.<br>56<br>66      | 6.<br>41<br>11<br>7 | 10<br>.8<br>55<br>53 | 9.<br>09<br>36<br>9 | 6.<br>73<br>34<br>2 | 11.<br>073<br>044<br>22  | 3.4<br>689<br>8          | 11.<br>07<br>30<br>44<br>22 | U<br>p           | 0.0<br>12<br>50<br>02<br>12 | 0.3<br>34<br>46<br>67<br>31 |
| 66<br>35       | SNRP<br>E    | Small nuclear ribonucleoprotein polypeptide E             | 7.<br>92<br>02<br>4 | 7.<br>74<br>22<br>4 | 7.<br>57<br>65<br>6 | 9.<br>70<br>37<br>6  | 8.<br>67<br>87<br>9 | 7.<br>96<br>67<br>5 | 2.0<br>516<br>054<br>85  | 1.0<br>367<br>533<br>33  | 2.0<br>51<br>60<br>54<br>85 | U<br>p           | 0.0<br>47<br>97<br>43<br>21 | 0.4<br>43<br>39<br>63<br>77 |
| 70<br>31       | TFF1         | Trefoil factor 1                                          | 5.<br>78<br>32      | 7.<br>39<br>74<br>3 | 9.<br>40<br>70<br>1 | 11<br>.8<br>89<br>4  | 9.<br>89<br>77<br>3 | 9.<br>77<br>88<br>9 | 7.9<br>601<br>374        | 2.9<br>927<br>933<br>33  | 7.9<br>60<br>13<br>74       | U<br>p           | 0.0<br>17<br>82<br>32<br>77 | 0.3<br>61<br>62<br>71<br>34 |
| 17<br>05<br>06 | DHX3<br>6    | DEAH (Asp-Glu-Ala-His) box polypeptide 36                 | 5.<br>87<br>07<br>5 | 5.<br>86<br>44<br>6 | 5.<br>53<br>05<br>7 | 6.<br>47<br>97<br>7  | 6.<br>70<br>95<br>8 | 7.<br>70<br>77<br>6 | 2.3<br>140<br>873<br>67  | 1.2<br>104<br>433<br>33  | 2.3<br>14<br>08<br>73<br>67 | U<br>p           | 0.0<br>10<br>82<br>52<br>46 | 0.3<br>23<br>87<br>84<br>16 |
| 83<br>85<br>6  | FSD1L        | Fibronectin type III and SPRY domain containing 1-like    | 5.<br>41<br>04<br>2 | 4.<br>80<br>79<br>1 | 3.<br>91<br>68<br>5 | 6.<br>14<br>35<br>8  | 5.<br>88<br>00<br>1 | 6.<br>05<br>67<br>5 | 2.4<br>881<br>152<br>85  | 1.3<br>150<br>533<br>33  | 2.4<br>88<br>11<br>52<br>85 | U<br>p           | 0.0<br>10<br>37<br>41<br>54 | 0.3<br>19<br>58<br>54<br>28 |
| 77<br>10       | ZNF15<br>4   | Zinc finger protein 154                                   | 5.<br>59<br>83<br>8 | 6.<br>99<br>41<br>2 | 6.<br>54<br>88<br>3 | 3.<br>89<br>70<br>3  | 4.<br>77<br>48<br>1 | 4.<br>19<br>12<br>9 | -4.<br>265<br>554<br>609 | -2.<br>092<br>733<br>333 | 4.2<br>65<br>55<br>46       | D<br>o<br>w<br>n | 0.0<br>01<br>39<br>42       | 0.1<br>87<br>10<br>78       |

|                |              |                                                                                             |                     |                     |                     |                      |                     |                     |                          |                          |                             |                  |                             |                             |    |
|----------------|--------------|---------------------------------------------------------------------------------------------|---------------------|---------------------|---------------------|----------------------|---------------------|---------------------|--------------------------|--------------------------|-----------------------------|------------------|-----------------------------|-----------------------------|----|
|                |              |                                                                                             |                     |                     |                     |                      |                     |                     |                          |                          |                             | 09               |                             | 74                          | 18 |
| 38<br>88<br>86 | LRRC<br>75B  | Leucine rich<br>repeat containing<br>75B                                                    | 6.<br>44<br>23<br>9 | 6.<br>92<br>81<br>8 | 6.<br>52<br>05<br>5 | 5.<br>34<br>31<br>7  | 5.<br>64<br>96<br>4 | 5.<br>47<br>46<br>3 | -2.<br>205<br>684<br>841 | -1.<br>141<br>226<br>667 | 2.2<br>05<br>68<br>48<br>41 | D<br>o<br>w<br>n | 0.0<br>01<br>49<br>46<br>78 | 0.1<br>87<br>10<br>78<br>18 |    |
| 65<br>24<br>4  | SPATS<br>2   | Spermatogenesis<br>associated, serine<br>rich 2                                             | 9.<br>07<br>31      | 9.<br>01<br>92<br>1 | 8.<br>61<br>73<br>9 | 7.<br>22<br>05<br>4  | 8.<br>26<br>88<br>6 | 7.<br>61<br>61<br>6 | -2.<br>299<br>595<br>32  | -1.<br>201<br>38         | 2.2<br>99<br>59<br>53<br>2  | D<br>o<br>w<br>n | 0.0<br>06<br>92<br>48<br>5  | 0.2<br>88<br>73<br>74<br>24 |    |
| 16<br>04       | CD55         | CD55 molecule,<br>decay accelerating<br>factor for<br>complement<br>(Cromer blood<br>group) | 4.<br>82<br>2       | 4.<br>93<br>54<br>5 | 4.<br>93<br>88<br>9 | 9.<br>25<br>45<br>4  | 8.<br>22<br>13<br>2 | 8.<br>71<br>99<br>4 | 14.<br>252<br>601<br>13  | 3.8<br>331<br>533<br>33  | 14.<br>25<br>26<br>01<br>13 | U<br>p           | 3.9<br>38<br>45<br>E-<br>06 | 0.0<br>51<br>29<br>04<br>57 |    |
| 55<br>83<br>5  | CENPJ        | Centromere<br>protein J                                                                     | 4.<br>68<br>76      | 4.<br>39<br>93      | 4.<br>38<br>57      | 5.<br>15<br>24<br>3  | 6.<br>27<br>64<br>7 | 6.<br>31<br>34<br>7 | 2.6<br>819<br>022<br>72  | 1.4<br>232<br>566<br>67  | 2.6<br>81<br>90<br>22<br>72 | U<br>p           | 0.0<br>04<br>50<br>52<br>14 | 0.2<br>53<br>49<br>44<br>23 |    |
| 44<br>10<br>27 | TMEM<br>150C | Transmembrane<br>protein 150C                                                               | 5.<br>90<br>83<br>9 | 6.<br>22<br>33<br>3 | 6.<br>26<br>11<br>7 | 4.<br>75<br>78<br>6  | 5.<br>29<br>59<br>4 | 4.<br>46<br>43<br>7 | -2.<br>447<br>948<br>715 | -1.<br>291<br>573<br>333 | 2.4<br>47<br>94<br>87<br>15 | D<br>o<br>w<br>n | 0.0<br>02<br>02<br>19<br>47 | 0.2<br>02<br>55<br>23<br>93 |    |
| 14<br>07<br>38 | TMEM<br>37   | Transmembrane<br>protein 37                                                                 | 9.<br>17<br>50<br>6 | 8.<br>24<br>15<br>1 | 8.<br>12<br>14      | 6.<br>46<br>83<br>8  | 7.<br>26<br>17<br>1 | 7.<br>35<br>00<br>7 | -2.<br>800<br>989<br>678 | -1.<br>485<br>936<br>667 | 2.8<br>00<br>98<br>96<br>78 | D<br>o<br>w<br>n | 0.0<br>05<br>88<br>62<br>56 | 0.2<br>78<br>75<br>16<br>66 |    |
| 81<br>65       | AKAP<br>1    | A-kinase<br>anchoring protein<br>1                                                          | 4.<br>66<br>52<br>2 | 5.<br>01<br>65<br>1 | 5.<br>69<br>26<br>4 | 6.<br>63<br>35       | 6.<br>73<br>11      | 7.<br>01<br>18      | 3.1<br>762<br>915<br>29  | 1.6<br>673<br>433<br>33  | 3.1<br>76<br>29<br>15<br>29 | U<br>p           | 0.0<br>00<br>96<br>06<br>51 | 0.1<br>86<br>14<br>79<br>2  |    |
| 10<br>61<br>1  | PDLI<br>M5   | PDZ and LIM<br>domain 5                                                                     | 8.<br>75<br>53<br>1 | 8.<br>06<br>12<br>8 | 8.<br>32<br>65<br>5 | 10<br>.0<br>27<br>29 | 9.<br>74<br>21<br>3 | 9.<br>99<br>08<br>5 | 2.9<br>060<br>173<br>84  | 1.5<br>390<br>433<br>33  | 2.9<br>06<br>01<br>73<br>84 | U<br>p           | 0.0<br>00<br>48<br>67<br>15 | 0.1<br>64<br>24<br>82<br>94 |    |
| 26<br>46       | PTPN1<br>8   | Protein tyrosine<br>phosphatase,                                                            | 9.<br>45            | 9.<br>50            | 10<br>.0            | 8.<br>17             | 8.<br>29            | 8.<br>52            | -2.<br>517               | -1.<br>331               | 2.5<br>17                   | D<br>o           | 0.0<br>00                   | 0.1<br>86                   |    |

|           |               |                                                          |         |         |         |         |         |         |              |              |             |                  |             |             |
|-----------|---------------|----------------------------------------------------------|---------|---------|---------|---------|---------|---------|--------------|--------------|-------------|------------------|-------------|-------------|
| 9         |               | non-receptor type 18 (brain-derived)                     | 813     | 711     | 2055    | 086     | 067     | 829     | 496897       | 99           | 496897      | w<br>n           | 978005      | 14792       |
| 3115      | HLA-DPB1      | Major histocompatibility complex, class II, DP $\beta$ 1 | 10109   | 7.69562 | 9.11387 | 5.68136 | 8.25704 | 7.25735 | -3.753439    | -1.908213    | 3.753439    | D<br>o<br>w<br>n | 0.0491679   | 0.4461748   |
| 388743    | CAPN8         | Calpain 8                                                | 5.0674  | 5.6107  | 7.5592  | 9.6542  | 7.5989  | 8.7433  | 6.0059674    | 2.5863966    | 6.0059674   | U<br>p           | 0.0111617   | 0.3246119   |
| 283450    | HECTD4        | HECT domain containing E3 ubiquitin protein ligase 4     | 7.92658 | 9.6907  | 9.18617 | 6.8193  | 7.98304 | 8.07092 | -2.479558621 | -1.310083333 | 2.479558621 | D<br>o<br>w<br>n | 0.0448291   | 0.435527714 |
| 388125    | C2CD4B        | C2 calcium-dependent domain containing 4B                | 7.40704 | 8.68745 | 8.17997 | 4.3195  | 5.53337 | 4.4185  | -10.086334   | -3.33433     | 10.086334   | D<br>o<br>w<br>n | 0.00152342  | 0.128621894 |
| 213       | ALB           | Albumin                                                  | 3.36922 | 4.03672 | 3.68137 | 10.2319 | 6.87745 | 4.33043 | 10.91257     | 3.44792      | 10.91257    | U<br>p           | 0.0347300   | 0.4084239   |
| 100526830 | SLX1A-SULT1A3 | SLX1A-SULT1A3 readthrough (NMD candidate)                | 6.47722 | 6.93547 | 6.66106 | 7.80233 | 8.02899 | 7.66662 | 2.205944764  | 1.14139667   | 2.205944764 | U<br>p           | 0.001523801 | 0.187107818 |
| 56892     | C8orf4        | Chromosome 8 open reading frame 4                        | 5.13931 | 5.31691 | 5.58203 | 8.26158 | 5.89229 | 7.34723 | 3.34380598   | 1.7415233    | 3.34380598  | U<br>p           | 0.01957746  | 0.367760084 |
| 25833     | POU2F3        | POU class 2 homeobox 3                                   | 5.47128 | 6.16327 | 6.42732 | 4.22622 | 4.79247 | 5.64671 | -2.191861541 | -1.132156667 | 2.191861541 | D<br>o<br>w<br>n | 0.0310196   | 0.399785461 |
| 97        | ATG13         | Autophagy related                                        | 7.      | 7.      | 7.      | 5.      | 6.      | 6.      | -2.          | -1.          | 2.2         | D                | 0.0         | 0.2         |

|                |              |                                                     |                     |                     |                     |                     |                     |                     |                          |                          |                             |                  |                             |                             |
|----------------|--------------|-----------------------------------------------------|---------------------|---------------------|---------------------|---------------------|---------------------|---------------------|--------------------------|--------------------------|-----------------------------|------------------|-----------------------------|-----------------------------|
| 76             |              | 13                                                  | 20<br>14<br>7       | 73<br>64<br>7       | 74<br>12            | 97<br>78<br>3       | 60<br>53<br>1       | 66<br>16<br>9       | 211<br>108<br>775        | 144<br>77                | 11<br>10<br>87<br>75        | o<br>w<br>n      | 05<br>06<br>75<br>65        | 65<br>39<br>50<br>28        |
| 84<br>24<br>5  | MR11         | Methylthioribose-<br>1-phosphate<br>isomerase 1     | 7.<br>79<br>77<br>5 | 7.<br>67<br>33<br>4 | 7.<br>69<br>53<br>8 | 6.<br>49<br>93<br>7 | 6.<br>44<br>96<br>1 | 6.<br>21<br>46      | -2.<br>521<br>525<br>24  | -1.<br>334<br>296<br>667 | 2.5<br>21<br>52<br>4        | D<br>o<br>w<br>n | 0.0<br>00<br>28<br>82<br>19 | 0.1<br>52<br>16<br>77<br>32 |
| 11<br>81       | CLCN<br>2    | Chloride channel,<br>voltage-sensitive 2            | 6.<br>61<br>13<br>2 | 6.<br>34<br>92<br>6 | 6.<br>81<br>61<br>3 | 5.<br>55<br>77<br>9 | 5.<br>49<br>51<br>7 | 5.<br>56<br>57<br>1 | -2.<br>074<br>379<br>71  | -1.<br>052<br>68         | 2.0<br>74<br>37<br>97<br>1  | D<br>o<br>w<br>n | 0.0<br>01<br>57<br>01<br>67 | 0.1<br>87<br>10<br>78<br>18 |
| 64<br>85<br>6  | VWA1         | Von Willebrand<br>factor A domain<br>containing 1   | 7.<br>80<br>43<br>8 | 9.<br>74<br>07      | 9.<br>33<br>43<br>9 | 7.<br>29<br>46      | 7.<br>51<br>18<br>4 | 7.<br>77<br>86<br>1 | -2.<br>697<br>220<br>248 | -1.<br>431<br>473<br>333 | 2.6<br>97<br>22<br>02<br>48 | D<br>o<br>w<br>n | 0.0<br>23<br>79<br>43<br>95 | 0.3<br>81<br>26<br>89<br>97 |
| 37<br>12       | IVD          | Isovaleryl-coa<br>dehydrogenase                     | 7.<br>28<br>01<br>6 | 7.<br>57<br>57<br>4 | 7.<br>57<br>90<br>2 | 4.<br>85<br>12<br>7 | 4.<br>94<br>34<br>8 | 6.<br>39<br>96      | -4.<br>228<br>629<br>027 | -2.<br>080<br>19         | 4.2<br>28<br>62<br>90<br>27 | D<br>o<br>w<br>n | 0.0<br>01<br>92<br>57<br>36 | 0.1<br>98<br>67<br>50<br>21 |
| 83<br>70       | HIST2<br>H4A | Histone cluster 2,<br>h4a                           | 8.<br>73<br>56<br>8 | 8.<br>01<br>41<br>9 | 8.<br>24<br>88<br>9 | 9.<br>86<br>20<br>7 | 9.<br>68<br>07<br>1 | 8.<br>55<br>79      | 2.0<br>476<br>559<br>52  | 1.0<br>339<br>733<br>33  | 2.0<br>47<br>65<br>59<br>52 | U<br>p           | 0.0<br>35<br>06<br>84<br>07 | 0.4<br>08<br>55<br>78<br>26 |
| 56<br>85<br>2  | RAD1<br>8    | RAD18, E3<br>ubiquitin protein<br>ligase            | 3.<br>92<br>57<br>9 | 4.<br>02<br>94<br>6 | 4.<br>64<br>51<br>6 | 5.<br>27<br>70<br>8 | 5.<br>43<br>02<br>8 | 5.<br>62<br>36<br>6 | 2.3<br>677<br>826<br>69  | 1.2<br>435<br>366<br>67  | 2.3<br>67<br>78<br>26<br>69 | U<br>p           | 0.0<br>01<br>61<br>86<br>66 | 0.1<br>87<br>65<br>47<br>34 |
| 14<br>06<br>12 | ZFP28        | ZFP28 zinc finger<br>protein                        | 6.<br>45<br>85<br>9 | 6.<br>59<br>47      | 6.<br>79<br>15      | 3.<br>29<br>28<br>4 | 5.<br>26<br>38<br>3 | 4.<br>48<br>88<br>2 | -4.<br>811<br>321<br>925 | -2.<br>266<br>433<br>333 | 4.8<br>11<br>32<br>19<br>25 | D<br>o<br>w<br>n | 0.0<br>02<br>09<br>83<br>59 | 0.2<br>06<br>94<br>32<br>89 |
| 29<br>70       | GTF2I<br>P1  | General<br>transcription factor<br>iii pseudogene 1 | 7.<br>83<br>21<br>3 | 8.<br>52<br>85<br>7 | 8.<br>56<br>69<br>7 | 7.<br>38<br>68      | 6.<br>91<br>57      | 7.<br>25<br>45<br>3 | -2.<br>178<br>819<br>474 | -1.<br>123<br>546<br>667 | 2.1<br>78<br>81<br>94<br>74 | D<br>o<br>w<br>n | 0.0<br>05<br>28<br>54<br>87 | 0.2<br>68<br>46<br>24<br>7  |

|        |          |                                                                      |         |         |         |         |         |         |           |           |         |   |             |             |
|--------|----------|----------------------------------------------------------------------|---------|---------|---------|---------|---------|---------|-----------|-----------|---------|---|-------------|-------------|
| 5909   | RAP1 GAP | RAP1 gtpase activating protein                                       | 8.41827 | 8.12033 | 8.5429  | 6.8337  | 5.6578  | 6.0847  | -4.495183 | -2.16838  | 4.49518 | D | 0.003517    | 0.160901541 |
| 10923  | SUB1     | SUB1 homolog, transcriptional regulator                              | 5.20958 | 5.30463 | 5.4644  | 6.44314 | 6.12227 | 6.43966 | 2.12268   | 1.0882    | 2.01226 | U | 0.00773726  | 0.192292584 |
| 51435  | SCAR A3  | Scavenger receptor class A, member 3                                 | 7.05334 | 8.61304 | 8.90748 | 6.21004 | 6.51688 | 6.29302 | -3.608268 | -1.851306 | 3.60826 | D | 0.00634558  | 0.283732496 |
| 3635   | INPP5 D  | Inositol polyphosphate-5-phosphatase D                               | 9.04125 | 8.68604 | 9.52402 | 7.20585 | 8.16247 | 7.04275 | -3.059749 | -1.613413 | 3.05974 | D | 0.00531664  | 0.2371466   |
| 154091 | SLC2A12  | Solute carrier family 2 (facilitated glucose transporter), member 12 | 5.60692 | 5.96824 | 5.79852 | 4.443   | 4.27936 | 5.06711 | -2.289030 | -1.194736 | 2.28903 | D | 0.0070166   | 0.22676712  |
| 8431   | NR0B2    | Nuclear receptor subfamily 0 group B member 2                        | 8.01791 | 4.89776 | 5.67328 | 4.28561 | 4.91401 | 3.95522 | -3.509754 | -1.81137  | 3.50975 | D | 0.009754291 | 0.446565527 |
| 155066 | ATP6V0E2 | Atpase, H <sup>+</sup> transporting V0 subunit e2                    | 6.40035 | 6.78612 | 6.44279 | 5.57732 | 5.28652 | 5.5081  | -2.077530 | -1.05487  | 2.07753 | D | 0.00927016  | 0.198675021 |
| 51029  | DESI2    | Desumoylating isopeptidase 2                                         | 5.33901 | 5.9055  | 5.60081 | 7.00865 | 6.73386 | 6.22306 | 2.563179  | 1.400633  | 2.05631 | U | 0.007922    | 0.2079554   |
| 3399   | ID3      | Inhibitor of DNA binding 3, dominant negative helix-loop-helix       | 6.92755 | 8.81204 | 7.81298 | 6.05594 | 7.17855 | 6.36685 | -2.491607 | -1.317076 | 2.49160 | D | 0.00392810  | 0.4225797   |

|                |                      |                                                                            |                     |                      |                     |                     |                      |                      |                          |                          |                             |                  |                             |                             |    |
|----------------|----------------------|----------------------------------------------------------------------------|---------------------|----------------------|---------------------|---------------------|----------------------|----------------------|--------------------------|--------------------------|-----------------------------|------------------|-----------------------------|-----------------------------|----|
|                |                      | protein                                                                    |                     |                      |                     |                     |                      |                      |                          |                          |                             | 35               |                             | 31                          | 15 |
| 13<br>64       | CLDN<br>4            | Claudin 4                                                                  | 9.<br>09<br>68      | 6.<br>97<br>92<br>7  | 8.<br>62<br>16<br>1 | 9.<br>16<br>47<br>4 | 10<br>.5<br>75<br>36 | 10<br>.5<br>58<br>79 | 3.6<br>479<br>096<br>55  | 1.8<br>670<br>7          | 3.6<br>47<br>90<br>96<br>55 | U<br>p           | 0.0<br>21<br>36<br>31<br>65 | 0.3<br>73<br>02<br>61<br>78 |    |
| 40<br>01       | LMNB<br>1            | Lamin B1                                                                   | 4.<br>68<br>84<br>7 | 3.<br>35<br>19<br>8  | 4.<br>31<br>60<br>8 | 5.<br>77<br>34<br>5 | 6.<br>42<br>83<br>1  | 5.<br>29<br>56<br>5  | 3.2<br>798<br>427<br>94  | 1.7<br>136<br>266<br>67  | 3.2<br>79<br>84<br>27<br>94 | U<br>p           | 0.0<br>05<br>16<br>88<br>14 | 0.2<br>66<br>23<br>90<br>84 |    |
| 90<br>63<br>9  | COX1<br>9            | COX19<br>cytochrome c<br>oxidase assembly<br>factor                        | 6.<br>80<br>01<br>5 | 6.<br>56<br>22<br>5  | 6.<br>52<br>05<br>9 | 8.<br>33<br>89      | 7.<br>67<br>92<br>1  | 7.<br>88<br>18<br>1  | 2.5<br>297<br>181<br>7   | 1.3<br>389<br>766<br>67  | 2.5<br>29<br>71<br>81<br>7  | U<br>p           | 0.0<br>01<br>00<br>70<br>66 | 0.1<br>86<br>14<br>79<br>2  |    |
| 56<br>65<br>4  | NPDC<br>1            | Neural<br>proliferation,<br>differentiation and<br>control, 1              | 9.<br>13<br>45<br>5 | 10<br>.8<br>41<br>97 | 10<br>.6<br>00<br>4 | 8.<br>97<br>64<br>9 | 7.<br>27<br>12<br>7  | 8.<br>22<br>49<br>4  | -4.<br>097<br>488<br>783 | -2.<br>034<br>74         | 4.0<br>97<br>48<br>87<br>83 | D<br>o<br>w<br>n | 0.0<br>10<br>23<br>55<br>12 | 0.3<br>18<br>63<br>84<br>27 |    |
| 38<br>74<br>96 | RASL1<br>1A          | RAS-like, family<br>11, member A                                           | 5.<br>57<br>58<br>3 | 5.<br>33<br>30<br>7  | 5.<br>57<br>64<br>7 | 5.<br>48<br>08<br>6 | 7.<br>50<br>82<br>4  | 7.<br>93<br>19       | 2.7<br>866<br>722<br>52  | 1.4<br>785<br>433<br>33  | 2.7<br>86<br>67<br>22<br>52 | U<br>p           | 0.0<br>45<br>13<br>99<br>14 | 0.4<br>36<br>20<br>36<br>37 |    |
| 47<br>39       | NEDD<br>9            | Neural precursor<br>cell expressed,<br>developmentally<br>down-regulated 9 | 4.<br>99<br>45      | 6.<br>48<br>02       | 6.<br>51<br>83<br>1 | 7.<br>48<br>90<br>8 | 7.<br>50<br>74<br>6  | 8.<br>08<br>53<br>2  | 3.2<br>406<br>502<br>69  | 1.6<br>962<br>833<br>33  | 3.2<br>40<br>65<br>02<br>69 | U<br>p           | 0.0<br>07<br>03<br>36<br>38 | 0.2<br>88<br>96<br>44<br>72 |    |
| 41<br>33       | MAP2                 | Microtubule<br>associated protein<br>2                                     | 6.<br>30<br>73<br>7 | 5.<br>20<br>01<br>5  | 4.<br>56<br>55      | 3.<br>96<br>57<br>5 | 4.<br>56<br>91<br>3  | 4.<br>02<br>66<br>8  | -2.<br>250<br>876<br>133 | -1.<br>170<br>486<br>667 | 2.2<br>50<br>87<br>61<br>33 | D<br>o<br>w<br>n | 0.0<br>34<br>01<br>17<br>88 | 0.4<br>08<br>27<br>35<br>55 |    |
| 41<br>89       | DNAJ<br>B9           | Dnaj heat shock<br>protein family<br>(Hsp40) member<br>B9                  | 6.<br>05<br>10<br>4 | 7.<br>84<br>36<br>6  | 6.<br>77<br>14<br>5 | 5.<br>12<br>63<br>5 | 5.<br>73<br>49<br>1  | 3.<br>84<br>38<br>7  | -3.<br>964<br>136<br>571 | -1.<br>987<br>006<br>667 | 3.9<br>64<br>13<br>65<br>71 | D<br>o<br>w<br>n | 0.0<br>13<br>79<br>65<br>93 | 0.3<br>44<br>49<br>38<br>94 |    |
| 10<br>10<br>60 | LOC10<br>106002<br>6 | Coiled-coil<br>domain-containing<br>protein 29-like                        | 7.<br>46<br>14      | 7.<br>42<br>23       | 7.<br>32<br>89      | 7.<br>15<br>84      | 5.<br>30<br>81       | 5.<br>41<br>93       | -2.<br>717<br>474        | -1.<br>442<br>266        | 2.7<br>17<br>47             | D<br>o<br>w      | 0.0<br>22<br>22             | 0.3<br>78<br>35             |    |

|        |            |                                               |         |         |         |         |         |         |              |              |              |                  |             |             |
|--------|------------|-----------------------------------------------|---------|---------|---------|---------|---------|---------|--------------|--------------|--------------|------------------|-------------|-------------|
| 026    |            |                                               | 8       | 2       | 1       | 3       | 1       | 7       | 819          | 667          | 4819         | n                | 5545        | 7221        |
| 10808  | HSPH1      | Heat shock protein family H (Hsp110) member 1 | 6.134   | 5.8012  | 5.8342  | 7.8652  | 6.4928  | 6.5381  | 2.05937009   | 1.04225      | 2.059437009  | U<br>p           | 0.034267626 | 0.408273555 |
| 151230 | KLHL23     | Kelch like family member 23                   | 5.0674  | 4.81491 | 4.4111  | 6.2807  | 6.6503  | 5.2846  | 2.47491093   | 1.3074233    | 2.474991093  | U<br>p           | 0.011589372 | 0.327659866 |
| 398    | ARHG DIG   | Rho GDP dissociation inhibitor (GDI) $\gamma$ | 5.32485 | 6.87893 | 7.31877 | 5.05021 | 5.17297 | 5.54782 | -2.379266155 | -1.250516667 | 2.379266155  | D<br>o<br>w<br>n | 0.043252279 | 0.432330901 |
| 3181   | HNRN PA2B1 | Heterogeneous nuclear ribonucleoprotein A2/B1 | 8.09576 | 7.91295 | 7.77169 | 8.72309 | 9.38455 | 8.68115 | 2.00380763   | 1.0027966    | 2.00380763   | U<br>p           | 0.006838252 | 0.288459719 |
| 63928  | CHP2       | Calcineurin-like EF-hand protein 2            | 3.82701 | 3.53221 | 4.06835 | 4.42903 | 8.39709 | 7.59482 | 7.98775439   | 2.99779      | 7.987794539  | U<br>p           | 0.015774911 | 0.350947357 |
| 9394   | HS6ST1     | Heparan sulfate 6-O-sulfotransferase 1        | 7.13065 | 6.88597 | 7.5306  | 4.71045 | 5.07127 | 4.43075 | -5.444945    | -2.44491667  | 5.4449451945 | D<br>o<br>w<br>n | 4.3768E-05  | 0.096052942 |
| 1796   | DOK1       | Docking protein 1                             | 6.25481 | 6.69652 | 6.05326 | 4.3164  | 5.48486 | 5.89172 | -2.14943784  | -1.10343667  | 2.14943784   | D<br>o<br>w<br>n | 0.036285569 | 0.413668192 |
| 284040 | CDRT4      | CMT1A duplicated region transcript 4          | 6.2623  | 7.6214  | 7.6244  | 5.80814 | 5.56614 | 6.2424  | -2.457452163 | -1.297163333 | 2.457452163  | D<br>o<br>w<br>n | 0.017558715 | 0.361123337 |
| 1005   | MINO S1-NB | MINOS1-NBL1 readthrough                       | 8.82    | 7.40    | 8.58    | 9.66    | 10.3    | 9.08    | 2.6787       | 1.4215       | 2.6787       | U<br>p           | 0.019       | 0.367       |



|                           |                      |                                                                |                      |                     |                     |                     |                     |                     |                          |                          |                             |                  |                             |                             |
|---------------------------|----------------------|----------------------------------------------------------------|----------------------|---------------------|---------------------|---------------------|---------------------|---------------------|--------------------------|--------------------------|-----------------------------|------------------|-----------------------------|-----------------------------|
| 32<br>73<br>6             | L1                   |                                                                | 00<br>7              | 03                  | 86<br>1             | 77<br>5             | 22<br>91            | 30<br>1             | 562<br>92                | 633<br>33                | 75<br>62<br>92              |                  | 34<br>57<br>08              | 66<br>41<br>57              |
| 72<br>76                  | TTR                  | Transthyretin                                                  | 11<br>.1<br>66<br>29 | 7.<br>20<br>88<br>8 | 7.<br>87<br>96<br>3 | 6.<br>55<br>20<br>6 | 6.<br>49<br>45<br>5 | 4.<br>89<br>99<br>7 | -6.<br>818<br>274<br>424 | -2.<br>769<br>406<br>667 | 6.8<br>18<br>27<br>44<br>24 | D<br>o<br>w<br>n | 0.0<br>31<br>75<br>19<br>88 | 0.4<br>02<br>73<br>83<br>8  |
| 55<br>73<br>2             | C1orf1<br>12         | Chromosome 1<br>open reading<br>frame 112                      | 3.<br>88<br>66<br>1  | 3.<br>96<br>37<br>2 | 3.<br>81<br>90<br>3 | 4.<br>82<br>03<br>4 | 4.<br>68<br>05<br>7 | 5.<br>21<br>98<br>4 | 2.0<br>238<br>887<br>65  | 1.0<br>171<br>3          | 2.0<br>23<br>88<br>87<br>65 | U<br>p           | 0.0<br>01<br>49<br>40<br>07 | 0.1<br>87<br>10<br>78<br>18 |
| 22<br>82<br>3             | MTF2                 | Metal response<br>element binding<br>transcription factor<br>2 | 6.<br>36<br>90<br>8  | 7.<br>29<br>47<br>5 | 7.<br>25<br>29<br>5 | 5.<br>76<br>89<br>9 | 5.<br>98<br>49<br>7 | 6.<br>16<br>25<br>9 | -2.<br>000<br>106<br>285 | -1.<br>000<br>076<br>667 | 2.0<br>00<br>10<br>62<br>85 | D<br>o<br>w<br>n | 0.0<br>13<br>97<br>81<br>87 | 0.3<br>45<br>20<br>46<br>8  |
| 51<br>73<br>8             | GHRL                 | Ghrelin/obestatin<br>prepropeptide                             | 5.<br>11<br>56<br>7  | 5.<br>95<br>44<br>7 | 7.<br>49<br>21      | 4.<br>73<br>74<br>6 | 4.<br>54<br>66<br>1 | 4.<br>80<br>91<br>6 | -2.<br>808<br>247<br>324 | -1.<br>489<br>67         | 2.8<br>08<br>24<br>73<br>24 | D<br>o<br>w<br>n | 0.0<br>32<br>78<br>54<br>67 | 0.4<br>05<br>09<br>02<br>6  |
| 49<br>29                  | NR4A<br>2            | Nuclear receptor<br>subfamily 4 group<br>A member 2            | 4.<br>34<br>51<br>3  | 3.<br>68<br>76<br>3 | 3.<br>19<br>93<br>1 | 4.<br>74<br>39      | 4.<br>23<br>40<br>1 | 5.<br>48<br>74<br>8 | 2.1<br>107<br>757<br>78  | 1.0<br>777<br>733<br>33  | 2.1<br>10<br>77<br>57<br>78 | U<br>p           | 0.0<br>32<br>49<br>11<br>68 | 0.4<br>04<br>71<br>37<br>9  |
| 90<br>26                  | HIP1R                | Huntingtin<br>interacting protein<br>1 related                 | 5.<br>91<br>13<br>9  | 5.<br>78<br>21<br>6 | 5.<br>71<br>93<br>1 | 4.<br>38<br>51<br>6 | 4.<br>24<br>33<br>1 | 5.<br>38<br>42<br>8 | -2.<br>193<br>705<br>713 | -1.<br>133<br>37         | 2.1<br>93<br>70<br>57<br>13 | D<br>o<br>w<br>n | 0.0<br>10<br>38<br>86<br>33 | 0.3<br>19<br>58<br>54<br>28 |
| 11<br>07<br>4             | TRIM3<br>1           | Tripartite motif<br>containing 31                              | 5.<br>08<br>67<br>5  | 4.<br>79<br>7       | 5.<br>28<br>27<br>5 | 6.<br>61<br>21<br>3 | 8.<br>68<br>24<br>9 | 8.<br>64<br>39<br>6 | 7.5<br>896<br>148<br>06  | 2.9<br>240<br>266<br>67  | 7.5<br>89<br>61<br>48<br>06 | U<br>p           | 0.0<br>01<br>28<br>07<br>21 | 0.1<br>87<br>10<br>78<br>18 |
| 10<br>53<br>73<br>32<br>6 | LOC10<br>537332<br>6 | Uncharacterized<br>LOC105373326                                | 9.<br>08<br>62<br>8  | 9.<br>13<br>30<br>1 | 8.<br>68<br>97<br>9 | 7.<br>67<br>03<br>6 | 7.<br>67<br>41<br>3 | 6.<br>85<br>00<br>7 | -2.<br>972<br>149<br>461 | -1.<br>571<br>506<br>667 | 2.9<br>72<br>14<br>94<br>61 | D<br>o<br>w<br>n | 0.0<br>01<br>21<br>49<br>71 | 0.1<br>86<br>14<br>79<br>2  |
| 12                        | IQGAP                | IQ motif                                                       | 4.                   | 3.                  | 3.                  | 4.                  | 5.                  | 4.                  | 2.0                      | 1.0                      | 2.0                         | U                | 0.0                         | 0.2                         |

|                      |                      |                                                                                                         |                      |                     |                      |                     |                      |                      |                          |                          |                             |                  |                             |                             |
|----------------------|----------------------|---------------------------------------------------------------------------------------------------------|----------------------|---------------------|----------------------|---------------------|----------------------|----------------------|--------------------------|--------------------------|-----------------------------|------------------|-----------------------------|-----------------------------|
| 82<br>39             | 3                    | containing gtpase<br>activating protein<br>3                                                            | 15<br>06<br>3        | 79<br>01<br>9       | 52<br>99<br>4        | 98<br>81<br>3       | 22<br>56<br>5        | 45<br>64<br>9        | 943<br>511<br>22         | 665<br>033<br>33         | 94<br>35<br>11<br>22        | p                | 05<br>55<br>53              | 71<br>43<br>14<br>26        |
| 53<br>47             | PLK1                 | Polo-like kinase 1                                                                                      | 6.<br>43<br>64<br>2  | 6.<br>03<br>16<br>7 | 6.<br>09<br>99<br>6  | 7.<br>55<br>48<br>8 | 7.<br>52<br>35<br>7  | 6.<br>92<br>46<br>7  | 2.2<br>114<br>970<br>74  | 1.1<br>450<br>233<br>33  | 2.2<br>11<br>49<br>70<br>74 | U<br>p           | 0.0<br>03<br>19<br>25<br>37 | 0.2<br>34<br>23<br>93<br>82 |
| 10<br>56<br>2        | OLFM<br>4            | Olfactomedin 4                                                                                          | 3.<br>63<br>80<br>6  | 4.<br>46<br>29      | 4.<br>68<br>11<br>7  | 9.<br>61<br>51<br>9 | 12<br>.3<br>87<br>43 | 10<br>.2<br>65<br>78 | 90.<br>222<br>998<br>79  | 6.4<br>954<br>233<br>33  | 90.<br>22<br>29<br>98<br>79 | U<br>p           | 3.8<br>92<br>71<br>E-<br>05 | 0.0<br>96<br>05<br>29<br>42 |
| 52<br>09             | PFKFB<br>3           | 6-phosphofructo-2<br>-kinase/fructose-2,<br>6-biphosphatase 3                                           | 10<br>.3<br>34<br>49 | 9.<br>53<br>66<br>6 | 10<br>.0<br>64<br>24 | 7.<br>40<br>55<br>8 | 9.<br>14<br>61<br>7  | 8.<br>54<br>63<br>7  | -3.<br>057<br>650<br>123 | -1.<br>612<br>423<br>333 | 3.0<br>57<br>65<br>01<br>23 | D<br>o<br>w<br>n | 0.0<br>10<br>63<br>40<br>79 | 0.3<br>23<br>31<br>73<br>76 |
| 51<br>04             | SERPI<br>NA5         | Serpin peptidase<br>inhibitor, clade A<br>( $\alpha$ -1<br>antiproteinase,<br>antitrypsin),<br>member 5 | 9.<br>01<br>19       | 7.<br>26<br>03<br>6 | 7.<br>23<br>18<br>7  | 2.<br>63<br>77<br>8 | 4.<br>41<br>35<br>4  | 3.<br>84<br>68<br>9  | -18<br>.40<br>433<br>011 | -4.<br>201<br>973<br>333 | 18.<br>40<br>43<br>30<br>11 | D<br>o<br>w<br>n | 0.0<br>00<br>28<br>29<br>56 | 0.1<br>52<br>16<br>77<br>32 |
| 10<br>25<br>7        | ABCC<br>4            | ATP binding<br>cassette subfamily<br>C member 4                                                         | 8.<br>03<br>79<br>9  | 7.<br>58<br>88<br>4 | 7.<br>54<br>89<br>1  | 5.<br>36<br>85<br>5 | 6.<br>35<br>18<br>3  | 6.<br>25<br>54       | -3.<br>324<br>920<br>856 | -1.<br>733<br>32         | 3.3<br>24<br>92<br>08<br>56 | D<br>o<br>w<br>n | 0.0<br>01<br>09<br>61<br>95 | 0.1<br>86<br>14<br>79<br>2  |
| 40<br>93             | SMAD<br>9            | SMAD family<br>member 9                                                                                 | 8.<br>03<br>76<br>3  | 8.<br>11<br>53<br>8 | 7.<br>72<br>41<br>5  | 6.<br>13<br>51<br>6 | 6.<br>36<br>84       | 6.<br>24<br>88       | -3.<br>267<br>679<br>904 | -1.<br>708<br>266<br>667 | 3.2<br>67<br>67<br>99<br>04 | D<br>o<br>w<br>n | 9.3<br>43<br>53<br>E-<br>05 | 0.1<br>27<br>84<br>98<br>29 |
| 55<br>27<br>7        | FGGY                 | FGGY<br>carbohydrate<br>kinase domain<br>containing                                                     | 5.<br>43<br>25       | 7.<br>12<br>87<br>2 | 6.<br>78<br>83<br>3  | 5.<br>14<br>91<br>5 | 5.<br>07<br>71<br>8  | 5.<br>39<br>02<br>3  | -2.<br>369<br>085<br>063 | -1.<br>244<br>33         | 2.3<br>69<br>08<br>50<br>63 | D<br>o<br>w<br>n | 0.0<br>25<br>44<br>18<br>83 | 0.3<br>84<br>42<br>60<br>11 |
| 10<br>19<br>29<br>09 | LOC10<br>192909<br>7 | Uncharacterized<br>LOC101929097                                                                         | 4.<br>41<br>28<br>4  | 4.<br>90<br>52<br>7 | 5.<br>25<br>76<br>9  | 3.<br>98<br>86<br>4 | 3.<br>69<br>18<br>6  | 3.<br>55<br>99<br>4  | -2.<br>161<br>131<br>211 | -1.<br>111<br>786<br>667 | 2.1<br>61<br>13<br>12       | D<br>o<br>w<br>n | 0.0<br>03<br>73<br>86       | 0.2<br>38<br>59<br>85       |

|                           |                      |                                                                                                                |                     |                     |                     |                     |                     |                     |                          |                          |                             |                  |                             |                             |   |
|---------------------------|----------------------|----------------------------------------------------------------------------------------------------------------|---------------------|---------------------|---------------------|---------------------|---------------------|---------------------|--------------------------|--------------------------|-----------------------------|------------------|-----------------------------|-----------------------------|---|
| 7                         |                      |                                                                                                                |                     |                     |                     |                     |                     |                     |                          |                          |                             | 11               |                             | 39                          | 3 |
| 87<br>94                  | TNFR<br>SF10C        | Tumor necrosis<br>factor receptor<br>superfamily<br>member 10c,<br>decoy without an<br>intracellular<br>domain | 7.<br>07<br>90<br>7 | 7.<br>62<br>83<br>6 | 7.<br>56<br>73<br>7 | 7.<br>18<br>18<br>7 | 5.<br>76<br>07<br>1 | 5.<br>60<br>29<br>3 | -2.<br>367<br>022<br>358 | -1.<br>243<br>073<br>333 | 2.3<br>67<br>02<br>23<br>58 | D<br>o<br>w<br>n | 0.0<br>26<br>78<br>28<br>65 | 0.3<br>88<br>38<br>41<br>04 |   |
| 56<br>64<br>9             | TMPR<br>SS4          | Transmembrane<br>protease, serine 4                                                                            | 5.<br>25<br>72      | 5.<br>37<br>44<br>4 | 5.<br>55<br>74<br>4 | 6.<br>40<br>72      | 6.<br>77<br>54<br>3 | 7.<br>05<br>92<br>2 | 2.5<br>507<br>532<br>29  | 1.3<br>509<br>233<br>33  | 2.5<br>50<br>75<br>32<br>29 | U<br>p           | 0.0<br>00<br>83<br>92<br>08 | 0.1<br>81<br>04<br>09<br>24 |   |
| 37<br>30                  | ANOS<br>1            | Anosmin 1                                                                                                      | 7.<br>58<br>25<br>3 | 7.<br>52<br>02<br>1 | 7.<br>36<br>87<br>9 | 4.<br>74<br>23<br>8 | 6.<br>77<br>20<br>1 | 5.<br>33<br>66<br>2 | -3.<br>664<br>221<br>374 | -1.<br>873<br>506<br>667 | 3.6<br>64<br>22<br>13<br>74 | D<br>o<br>w<br>n | 0.0<br>07<br>02<br>22<br>55 | 0.2<br>88<br>96<br>44<br>72 |   |
| 79<br>37<br>0             | BCL2L<br>14          | BCL2-like 14<br>(apoptosis<br>facilitator)                                                                     | 4.<br>80<br>85<br>5 | 4.<br>52<br>24<br>5 | 5.<br>34<br>20<br>8 | 6.<br>47<br>78<br>4 | 6.<br>56<br>66<br>8 | 5.<br>54<br>84<br>4 | 2.4<br>736<br>247<br>62  | 1.3<br>066<br>266<br>67  | 2.4<br>73<br>62<br>47<br>62 | U<br>p           | 0.0<br>07<br>94<br>88<br>3  | 0.2<br>99<br>13<br>95<br>54 |   |
| 10<br>04<br>99<br>48<br>4 | LOC10<br>049948<br>4 | SUGT1-1300002<br>K09Rik<br>pseudogene                                                                          | 5.<br>20<br>56      | 5.<br>44<br>10<br>4 | 5.<br>73<br>66<br>4 | 4.<br>11<br>49<br>1 | 4.<br>38<br>10<br>3 | 4.<br>78<br>42<br>5 | -2.<br>048<br>209<br>564 | -1.<br>034<br>363<br>333 | 2.0<br>48<br>20<br>95<br>64 | D<br>o<br>w<br>n | 0.0<br>04<br>61<br>04<br>78 | 0.2<br>54<br>41<br>63<br>12 |   |
| 80<br>77<br>7             | CYB5<br>B            | Cytochrome b5<br>type B (outer<br>mitochondrial<br>membrane)                                                   | 4.<br>48<br>19<br>3 | 5.<br>17<br>98<br>2 | 5.<br>03<br>77<br>3 | 6.<br>07<br>12<br>7 | 6.<br>25<br>79<br>7 | 5.<br>72<br>85<br>2 | 2.1<br>726<br>061<br>5   | 1.1<br>194<br>266<br>67  | 2.1<br>72<br>60<br>61<br>5  | U<br>p           | 0.0<br>04<br>10<br>43<br>81 | 0.2<br>44<br>25<br>17<br>2  |   |
| 39<br>20                  | LAMP<br>2            | Lysosomal-associa<br>ted membrane<br>protein 2                                                                 | 9.<br>08<br>62<br>8 | 9.<br>13<br>30<br>1 | 8.<br>68<br>97<br>9 | 7.<br>67<br>03<br>6 | 7.<br>67<br>41<br>3 | 6.<br>85<br>00<br>7 | -2.<br>972<br>149<br>461 | -1.<br>571<br>506<br>667 | 2.9<br>72<br>14<br>94<br>61 | D<br>o<br>w<br>n | 0.0<br>01<br>21<br>49<br>71 | 0.1<br>86<br>14<br>79<br>2  |   |
| 56<br>91<br>2             | IFT46                | Intraflagellar<br>transport 46                                                                                 | 6.<br>07<br>70<br>8 | 5.<br>99<br>06<br>3 | 6.<br>19<br>06<br>5 | 5.<br>04<br>36<br>5 | 4.<br>37<br>32<br>3 | 5.<br>17<br>01<br>7 | -2.<br>335<br>562<br>415 | -1.<br>223<br>77<br>415  | 2.3<br>35<br>56<br>24<br>15 | D<br>o<br>w<br>n | 0.0<br>02<br>30<br>06<br>02 | 0.2<br>12<br>16<br>29<br>49 |   |
| 48                        | ATP2A                | Atpase, Ca <sup>++</sup>                                                                                       | 8.                  | 9.                  | 10                  | 8.                  | 7.                  | 8.                  | -2.                      | -1.                      | 2.1                         | D                | 0.0                         | 0.4                         |   |

|                |                |                                                                                 |                      |                     |                     |                     |                     |                     |                          |                         |                             |                  |                             |                             |
|----------------|----------------|---------------------------------------------------------------------------------|----------------------|---------------------|---------------------|---------------------|---------------------|---------------------|--------------------------|-------------------------|-----------------------------|------------------|-----------------------------|-----------------------------|
| 9              | 3              | transporting,<br>ubiquitous                                                     | 64<br>32<br>5        | 27<br>55<br>2       | .2<br>53<br>22      | 63<br>76<br>3       | 69<br>74<br>4       | 52<br>62            | 148<br>862<br>741        | 103<br>573<br>333       | 48<br>86<br>27<br>41        | o<br>w<br>n      | 47<br>97<br>75<br>53        | 43<br>39<br>63<br>77        |
| 81<br>53<br>9  | SLC38<br>A1    | Solute carrier<br>family 38, member<br>1                                        | 6.<br>10<br>90<br>7  | 4.<br>24<br>49<br>3 | 5.<br>12<br>48<br>7 | 6.<br>71<br>52<br>1 | 7.<br>29<br>62<br>8 | 6.<br>81<br>47<br>4 | 3.4<br>401<br>067<br>49  | 1.7<br>824<br>533<br>33 | 3.4<br>40<br>10<br>67<br>49 | U<br>p           | 0.0<br>06<br>75<br>66<br>21 | 0.2<br>88<br>45<br>97<br>19 |
| 99<br>65       | FGF19          | Fibroblast growth<br>factor 19                                                  | 11<br>.8<br>28<br>82 | 8.<br>68<br>11<br>9 | 9.<br>32<br>96<br>5 | 4.<br>06<br>76<br>1 | 5.<br>93<br>23<br>5 | 3.<br>97<br>93<br>6 | -39<br>.03<br>726<br>299 | -5.<br>286<br>78        | 39.<br>03<br>72<br>62<br>99 | D<br>o<br>w<br>n | 0.0<br>00<br>61<br>48<br>57 | 0.1<br>68<br>94<br>20<br>05 |
| 27<br>4        | BIN1           | Bridging<br>integrator 1                                                        | 8.<br>31<br>46<br>2  | 7.<br>41<br>99<br>9 | 7.<br>18<br>59      | 5.<br>55<br>94<br>5 | 6.<br>78<br>90<br>9 | 6.<br>34<br>53<br>3 | -2.<br>655<br>309<br>445 | -1.<br>408<br>88        | 2.6<br>55<br>30<br>94<br>45 | D<br>o<br>w<br>n | 0.0<br>12<br>46<br>43<br>72 | 0.3<br>34<br>46<br>67<br>31 |
| 38<br>32       | KIF11          | Kinesin family<br>member 11                                                     | 4.<br>06<br>13<br>9  | 3.<br>21<br>15<br>9 | 4.<br>16<br>16<br>2 | 5.<br>54<br>54<br>1 | 5.<br>71<br>43<br>2 | 4.<br>80<br>93      | 2.9<br>176<br>564<br>14  | 1.5<br>448<br>1         | 2.9<br>17<br>65<br>64<br>14 | U<br>p           | 0.0<br>03<br>17<br>46<br>49 | 0.2<br>34<br>23<br>93<br>82 |
| 84<br>51<br>5  | MCM8           | Minichromosome<br>maintenance 8<br>homologous<br>recombination<br>repair factor | 4.<br>69<br>27       | 4.<br>32<br>05<br>9 | 4.<br>49<br>53<br>8 | 4.<br>83<br>45<br>5 | 6.<br>28<br>28<br>8 | 5.<br>67<br>28<br>1 | 2.1<br>344<br>386<br>07  | 1.0<br>938<br>566<br>67 | 2.1<br>34<br>43<br>86<br>07 | U<br>p           | 0.0<br>21<br>46<br>04<br>69 | 0.3<br>73<br>80<br>25<br>25 |
| 44<br>06<br>86 | HIST2<br>H3PS2 | Histone cluster 2,<br>H3, pseudogene 2                                          | 6.<br>19<br>18<br>1  | 5.<br>50<br>18<br>7 | 5.<br>70<br>53<br>8 | 7.<br>08<br>31<br>2 | 7.<br>49<br>99<br>7 | 6.<br>87<br>60<br>8 | 2.5<br>550<br>827<br>22  | 1.3<br>533<br>7         | 2.5<br>55<br>08<br>27<br>22 | U<br>p           | 0.0<br>01<br>87<br>90<br>27 | 0.1<br>95<br>76<br>45<br>58 |
| 11<br>15<br>3  | FICD           | FIC domain<br>containing                                                        | 5.<br>10<br>69<br>2  | 6.<br>94<br>44<br>8 | 5.<br>82<br>60<br>3 | 4.<br>28<br>28<br>2 | 4.<br>20<br>27<br>8 | 4.<br>82<br>47<br>5 | -2.<br>872<br>605<br>742 | -1.<br>522<br>36        | 2.8<br>72<br>60<br>57<br>42 | D<br>o<br>w<br>n | 0.0<br>13<br>81<br>71<br>33 | 0.3<br>44<br>49<br>38<br>94 |
| 65<br>14       | SLC2A<br>2     | Solute carrier<br>family 2<br>(facilitated glucose<br>transporter),<br>member 2 | 3.<br>98<br>76<br>2  | 4.<br>61<br>70<br>5 | 5.<br>05<br>15<br>3 | 4.<br>10<br>19<br>9 | 3.<br>06<br>68<br>8 | 2.<br>46<br>16<br>3 | -2.<br>534<br>849<br>336 | -1.<br>341<br>9         | 2.5<br>34<br>84<br>93<br>36 | D<br>o<br>w<br>n | 0.0<br>21<br>93<br>06<br>57 | 0.3<br>77<br>76<br>08<br>81 |

|                |            |                                                                     |                      |                     |                     |                     |                     |                     |                          |                          |                             |                  |                             |                             |
|----------------|------------|---------------------------------------------------------------------|----------------------|---------------------|---------------------|---------------------|---------------------|---------------------|--------------------------|--------------------------|-----------------------------|------------------|-----------------------------|-----------------------------|
| 79<br>18<br>8  | TMEM<br>43 | Transmembrane<br>protein 43                                         | 6.<br>20<br>95<br>4  | 5.<br>54<br>06<br>8 | 5.<br>94<br>30<br>8 | 6.<br>85<br>89<br>2 | 7.<br>37<br>73<br>6 | 6.<br>54<br>27<br>3 | 2.0<br>400<br>011<br>99  | 1.0<br>285<br>7          | 2.0<br>40<br>00<br>11<br>99 | U<br>p           | 0.0<br>11<br>09<br>30<br>66 | 0.3<br>24<br>51<br>13<br>09 |
| 14<br>76<br>86 | ZNF41<br>8 | Zinc finger protein<br>418                                          | 4.<br>44<br>19       | 5.<br>39<br>89<br>6 | 5.<br>27<br>57<br>2 | 2.<br>73<br>74<br>3 | 3.<br>92<br>19      | 3.<br>84<br>2       | -2.<br>904<br>755<br>365 | -1.<br>538<br>416<br>667 | 2.9<br>04<br>75<br>53<br>65 | D<br>o<br>w<br>n | 0.0<br>06<br>42<br>36<br>58 | 0.2<br>84<br>77<br>87<br>82 |
| 10<br>48<br>6  | CAP2       | CAP, adenylate<br>cyclase-associated<br>protein, 2 (yeast)          | 5.<br>56<br>10<br>5  | 5.<br>30<br>39<br>2 | 4.<br>46<br>32<br>9 | 6.<br>49<br>62<br>7 | 5.<br>68<br>27      | 6.<br>64<br>18<br>9 | 2.2<br>410<br>890<br>88  | 1.1<br>642               | 2.2<br>41<br>08<br>90<br>88 | U<br>p           | 0.0<br>19<br>09<br>08<br>94 | 0.3<br>67<br>52<br>43<br>59 |
| 51<br>30<br>3  | FKBP1<br>1 | FK506 binding<br>protein 11                                         | 5.<br>49<br>62<br>1  | 6.<br>83<br>61<br>2 | 6.<br>51<br>61<br>8 | 5.<br>61<br>56<br>2 | 4.<br>91<br>00<br>4 | 4.<br>73<br>32      | -2.<br>291<br>909<br>376 | -1.<br>196<br>55         | 2.2<br>91<br>90<br>93<br>76 | D<br>o<br>w<br>n | 0.0<br>22<br>61<br>27<br>24 | 0.3<br>79<br>32<br>86<br>95 |
| 59<br>83       | RFC3       | Replication factor<br>C subunit 3                                   | 5.<br>82<br>65<br>7  | 5.<br>93<br>25<br>6 | 5.<br>60<br>17<br>1 | 6.<br>78<br>03<br>9 | 7.<br>68<br>79<br>4 | 6.<br>91<br>93      | 2.5<br>354<br>878<br>01  | 1.3<br>422<br>633<br>33  | 2.5<br>35<br>48<br>78<br>01 | U<br>p           | 0.0<br>02<br>55<br>80<br>18 | 0.2<br>21<br>48<br>56<br>65 |
| 10<br>16<br>4  | CHST4      | Carbohydrate<br>(N-acetylglucosam<br>ine 6-O)<br>sulfotransferase 4 | 10<br>.6<br>81<br>23 | 6.<br>95<br>28<br>8 | 7.<br>78<br>74<br>7 | 4.<br>58<br>93<br>4 | 7.<br>33<br>18<br>1 | 5.<br>51<br>65<br>4 | -6.<br>326<br>013<br>64  | -2.<br>661<br>296<br>667 | 6.3<br>26<br>01<br>36<br>4  | D<br>o<br>w<br>n | 0.0<br>42<br>11<br>40<br>28 | 0.4<br>30<br>36<br>23<br>78 |
| 10<br>87<br>3  | ME3        | Malic enzyme 3,<br>NADP(+)-depende<br>nt, mitochondrial             | 7.<br>45<br>55<br>8  | 7.<br>87<br>51<br>4 | 7.<br>38<br>14<br>9 | 6.<br>53<br>49<br>1 | 6.<br>43<br>05      | 6.<br>45<br>30<br>5 | -2.<br>140<br>453<br>756 | -1.<br>097<br>916<br>667 | 2.1<br>40<br>45<br>37<br>56 | D<br>o<br>w<br>n | 0.0<br>01<br>63<br>71<br>07 | 0.1<br>88<br>11<br>80<br>17 |
| 73<br>21       | UBE2<br>D1 | Ubiquitin<br>conjugating<br>enzyme E2D 1                            | 5.<br>14<br>41       | 4.<br>80<br>51<br>2 | 4.<br>40<br>79<br>6 | 5.<br>62<br>28<br>3 | 6.<br>82<br>65<br>1 | 5.<br>82<br>23<br>3 | 2.4<br>705<br>461<br>4   | 1.3<br>048<br>3          | 2.4<br>70<br>54<br>61<br>4  | U<br>p           | 0.0<br>09<br>80<br>30<br>2  | 0.3<br>14<br>70<br>35<br>37 |
| 13<br>62       | CPD        | Carboxypeptidase<br>D                                               | 7.<br>66<br>64       | 8.<br>84<br>35<br>8 | 8.<br>99<br>33<br>8 | 7.<br>98<br>30<br>8 | 7.<br>31<br>74<br>6 | 6.<br>42<br>24<br>4 | -2.<br>395<br>167<br>692 | -1.<br>260<br>126<br>667 | 2.3<br>95<br>16<br>76       | D<br>o<br>w<br>n | 0.0<br>41<br>34<br>85       | 0.4<br>27<br>14<br>11       |

|                |               |                                                        |                     |                     |                     |                     |                     |                     |                          |                          |                             |                  |                             |                             |
|----------------|---------------|--------------------------------------------------------|---------------------|---------------------|---------------------|---------------------|---------------------|---------------------|--------------------------|--------------------------|-----------------------------|------------------|-----------------------------|-----------------------------|
|                |               |                                                        |                     |                     |                     |                     |                     |                     |                          |                          | 92                          |                  | 84                          | 54                          |
| 64<br>42<br>49 | LOC64<br>4249 | Coiled-coil<br>domain-containing<br>protein 29-like    | 7.<br>46<br>14<br>8 | 7.<br>42<br>23<br>2 | 7.<br>32<br>89<br>1 | 7.<br>15<br>84<br>3 | 5.<br>30<br>81<br>1 | 5.<br>41<br>93<br>7 | -2.<br>717<br>474<br>819 | -1.<br>442<br>266<br>667 | 2.7<br>17<br>47<br>48<br>19 | D<br>o<br>w<br>n | 0.0<br>22<br>22<br>55<br>45 | 0.3<br>78<br>35<br>72<br>21 |
| 15<br>83<br>99 | ZNF48<br>3    | Zinc finger protein<br>483                             | 4.<br>96<br>25<br>3 | 4.<br>79<br>25<br>7 | 5.<br>46<br>77<br>2 | 2.<br>46<br>48<br>7 | 4.<br>54<br>73<br>1 | 4.<br>25<br>38      | -2.<br>494<br>838<br>913 | -1.<br>318<br>946<br>667 | 2.4<br>94<br>83<br>89<br>13 | D<br>o<br>w<br>n | 0.0<br>45<br>16<br>28<br>15 | 0.4<br>36<br>31<br>70<br>19 |
| 57<br>47<br>6  | GRAM<br>D1B   | GRAM domain<br>containing 1B                           | 8.<br>30<br>76<br>1 | 8.<br>47<br>26<br>8 | 8.<br>95<br>95<br>1 | 6.<br>98<br>64<br>1 | 5.<br>16<br>36<br>4 | 5.<br>71<br>37      | -6.<br>170<br>325<br>797 | -2.<br>625<br>346<br>667 | 6.1<br>70<br>32<br>57<br>97 | D<br>o<br>w<br>n | 0.0<br>00<br>89<br>98<br>58 | 0.1<br>81<br>04<br>09<br>24 |
| 67<br>88       | STK3          | Serine/threonine<br>kinase 3                           | 6.<br>34<br>18<br>7 | 6.<br>46<br>83<br>6 | 6.<br>30<br>40<br>9 | 7.<br>76<br>66<br>7 | 7.<br>67<br>06<br>3 | 6.<br>68<br>66      | 2.0<br>044<br>318<br>03  | 1.0<br>031<br>933<br>33  | 2.0<br>04<br>43<br>18<br>03 | U<br>p           | 0.0<br>17<br>40<br>53<br>29 | 0.3<br>60<br>38<br>98<br>23 |
| 51<br>18<br>1  | DCXR          | Dicarbonyl/L-xylu<br>lose reductase                    | 7.<br>14<br>50<br>8 | 8.<br>74<br>32<br>1 | 8.<br>00<br>70<br>5 | 7.<br>13<br>15<br>4 | 6.<br>84<br>30<br>3 | 5.<br>90<br>48<br>9 | -2.<br>529<br>104<br>531 | -1.<br>338<br>626<br>667 | 2.5<br>29<br>10<br>45<br>31 | D<br>o<br>w<br>n | 0.0<br>28<br>70<br>62<br>22 | 0.3<br>93<br>40<br>55<br>85 |
| 24<br>91       | CENPI         | Centromere<br>protein I                                | 4.<br>16<br>69<br>3 | 3.<br>64<br>40<br>1 | 4.<br>04<br>21<br>8 | 4.<br>73<br>88<br>9 | 5.<br>55<br>43<br>2 | 4.<br>76<br>66<br>6 | 2.0<br>978<br>574<br>75  | 1.0<br>689<br>166<br>67  | 2.0<br>97<br>85<br>74<br>75 | U<br>p           | 0.0<br>07<br>10<br>87<br>82 | 0.2<br>89<br>31<br>65<br>01 |
| 51<br>30<br>1  | GCNT<br>4     | Glucosaminyl<br>(N-acetyl)<br>transferase 4, core<br>2 | 8.<br>85<br>51<br>3 | 8.<br>38<br>15<br>6 | 8.<br>31<br>68<br>7 | 3.<br>96<br>62<br>1 | 5.<br>03<br>62<br>4 | 3.<br>78<br>70<br>5 | -19<br>.08<br>922<br>552 | -4.<br>254<br>686<br>667 | 19.<br>08<br>92<br>25<br>52 | D<br>o<br>w<br>n | 9.3<br>82<br>72<br>E-<br>06 | 0.0<br>69<br>64<br>55<br>19 |
| 36<br>69       | ISG20         | Interferon<br>stimulated<br>exonuclease gene<br>20kda  | 9.<br>12<br>11<br>8 | 7.<br>70<br>52<br>7 | 7.<br>37<br>24<br>2 | 6.<br>67<br>63<br>8 | 6.<br>31<br>51<br>8 | 6.<br>97<br>71<br>5 | -2.<br>657<br>469<br>867 | -1.<br>410<br>053<br>333 | 2.6<br>57<br>46<br>98<br>67 | D<br>o<br>w<br>n | 0.0<br>20<br>28<br>08<br>55 | 0.3<br>71<br>13<br>26<br>99 |
| 50<br>28       | P2RY1         | Purinergic<br>receptor P2Y,<br>G-protein coupled,      | 6.<br>62<br>73      | 6.<br>07<br>03      | 6.<br>52<br>92      | 4.<br>05<br>63      | 5.<br>63<br>02      | 5.<br>69<br>20      | -2.<br>433<br>079        | -1.<br>282<br>783        | 2.4<br>33<br>07             | D<br>o<br>w      | 0.0<br>27<br>98             | 0.3<br>92<br>00             |

|    |       |                     |    |    |    |    |    |    |     |     |     |   |     |     |
|----|-------|---------------------|----|----|----|----|----|----|-----|-----|-----|---|-----|-----|
|    |       | 1                   | 7  | 2  | 5  | 4  | 4  | 1  | 285 | 333 | 92  | n | 63  | 23  |
| 84 | FAM2  | Family with         | 6. | 5. | 6. | 5. | 5. | 5. | -2. | -1. | 2.1 | D | 0.0 | 0.3 |
| 91 | 22A   | sequence            | 69 | 91 | 83 | 66 | 02 | 50 | 126 | 088 | 26  | o | 11  | 27  |
| 5  |       | similarity 222      | 96 | 24 | 82 | 01 | 18 | 20 | 911 | 76  | 91  | w | 46  | 65  |
|    |       | member A            | 6  | 3  | 6  | 5  | 3  | 9  | 493 |     | 14  | n | 96  | 98  |
|    |       |                     |    |    |    |    |    |    |     |     | 93  |   | 42  | 66  |
| 83 | CAST  | Calpastatin         | 6. | 5. | 6. | 7. | 7. | 6. | 2.2 | 1.1 | 2.2 | U | 0.0 | 0.2 |
| 1  |       |                     | 44 | 95 | 06 | 13 | 84 | 99 | 454 | 670 | 45  | p | 05  | 69  |
|    |       |                     | 55 | 73 | 56 | 00 | 14 | 80 | 999 | 366 | 49  |   | 48  | 83  |
|    |       |                     | 2  | 2  | 4  | 7  | 7  | 5  | 14  | 67  | 99  |   | 65  | 57  |
|    |       |                     |    |    |    |    |    |    |     |     | 14  |   | 54  | 64  |
| 10 | ZSCA  | Zinc finger and     | 4. | 4. | 4. | 4. | 3. | 2. | -2. | -1. | 2.0 | D | 0.0 | 0.4 |
| 01 | N30   | SCAN domain         | 31 | 62 | 83 | 32 | 73 | 59 | 052 | 037 | 52  | o | 46  | 39  |
| 01 |       | containing 30       | 26 | 85 | 11 | 44 | 78 | 83 | 254 | 21  | 25  | w | 27  | 77  |
| 46 |       |                     | 4  | 6  | 2  | 3  | 8  | 8  | 997 |     | 49  | n | 00  | 72  |
| 7  |       |                     |    |    |    |    |    |    |     |     | 97  |   | 36  | 08  |
| 23 | SULF1 | Sulfatase 1         | 5. | 5. | 5. | 5. | 10 | 8. | 7.5 | 2.9 | 7.5 | U | 0.0 | 0.3 |
| 21 |       |                     | 38 | 79 | 06 | 97 | .6 | 33 | 052 | 079 | 05  | p | 28  | 92  |
| 3  |       |                     | 24 | 21 | 07 | 91 | 44 | 50 | 840 | 066 | 28  |   | 21  | 90  |
|    |       |                     | 4  | 8  | 6  | 5  | 93 | 2  | 11  | 67  | 40  |   | 93  | 93  |
|    |       |                     |    |    |    |    |    |    |     |     | 11  |   | 98  | 52  |
| 38 | ARHG  | Rho guanine         | 6. | 7. | 6. | 6. | 5. | 6. | -2. | -1. | 2.3 | D | 0.0 | 0.3 |
| 93 | EF37  | nucleotide          | 61 | 92 | 96 | 18 | 31 | 37 | 310 | 207 | 10  | o | 25  | 85  |
| 37 |       | exchange factor 37  | 60 | 23 | 09 | 94 | 58 | 00 | 160 | 993 | 16  | w | 96  | 81  |
|    |       |                     | 9  | 5  |    | 5  | 4  | 7  | 894 | 333 | 08  | n | 29  | 07  |
|    |       |                     |    |    |    |    |    |    |     |     | 94  |   | 73  | 78  |
| 57 | NUFIP | Nuclear fragile X   | 5. | 5. | 5. | 6. | 6. | 6. | 2.1 | 1.0 | 2.1 | U | 0.0 | 0.2 |
| 53 | 2     | mental retardation  | 28 | 86 | 85 | 47 | 98 | 81 | 295 | 905 | 29  | p | 04  | 45  |
| 2  |       | protein interacting | 50 | 84 | 04 | 35 | 57 | 63 | 619 | 566 | 56  |   | 16  | 18  |
|    |       | protein 2           | 3  |    | 2  | 2  |    |    | 02  | 67  | 19  |   | 69  | 04  |
|    |       |                     |    |    |    |    |    |    |     |     | 02  |   | 82  | 58  |
| 12 | NIPA1 | Non imprinted in    | 7. | 7. | 7. | 6. | 6. | 6. | -2. | -1. | 2.2 | D | 0.0 | 0.1 |
| 36 |       | Prader-Willi/Angel  | 64 | 33 | 34 | 37 | 32 | 08 | 262 | 178 | 62  | o | 00  | 81  |
| 06 |       | man syndrome 1      | 35 | 35 | 05 | 37 | 84 | 11 | 811 | 116 | 81  | w | 88  | 04  |
|    |       |                     | 5  |    | 7  |    | 7  |    | 905 | 667 | 19  | n | 42  | 09  |
|    |       |                     |    |    |    |    |    |    |     |     | 05  |   | 24  | 24  |
| 58 | BBS1  | Bardet-Biedl        | 8. | 7. | 8. | 6. | 6. | 7. | -2. | -1. | 2.3 | D | 0.0 | 0.1 |
| 2  |       | syndrome 1          | 03 | 94 | 12 | 78 | 52 | 03 | 383 | 252 | 83  | o | 00  | 75  |
|    |       |                     | 35 | 51 | 72 | 62 | 92 | 15 | 343 | 986 | 34  | w | 75  | 76  |
|    |       |                     | 2  | 6  | 8  | 7  | 2  | 1  | 122 | 667 | 31  | n | 58  | 93  |
|    |       |                     |    |    |    |    |    |    |     |     | 22  |   | 23  | 57  |
| 53 | PLP2  | Proteolipid protein | 7. | 7. | 7. | 8. | 9. | 8. | 2.0 | 1.0 | 2.0 | U | 0.0 | 0.3 |
| 55 |       | 2 (colonic          | 57 | 32 | 17 | 04 | 14 | 07 | 870 | 614 | 87  | p | 17  | 62  |

|        |           |                                                                              |          |          |          |         |         |         |              |              |             |       |             |             |
|--------|-----------|------------------------------------------------------------------------------|----------|----------|----------|---------|---------|---------|--------------|--------------|-------------|-------|-------------|-------------|
|        |           | epithelium-enriched)                                                         | 766      | 313      | 722      | 045     | 693     | 499     | 32886        | 53333        | 032886      |       | 990067      | 487638      |
| 10891  | PPARGC1A  | Peroxisome proliferator-activated receptor $\gamma$ , coactivator 1 $\alpha$ | 6.56868  | 6.37334  | 6.5076   | 5.7104  | 5.42839 | 3.64886 | -2.93623343  | -1.553966    | 2.93623343  | Dow n | 0.02123888  | 0.372540654 |
| 6035   | RNAS E1   | Ribonuclease, rnasase A family, 1 (pancreatic)                               | 11.86701 | 12.0681  | 11.58814 | 7.33756 | 9.45881 | 9.0283  | -9.401254832 | -3.232853333 | 9.401254832 | Dow n | 0.00543257  | 0.164531093 |
| 3146   | HMGB1     | High mobility group box 1                                                    | 6.46867  | 6.11683  | 6.36068  | 7.24126 | 8.27316 | 7.48406 | 2.55047625   | 1.35076667   | 2.55047625  | U p   | 0.003441408 | 0.2371466   |
| 3172   | HNF4A     | Hepatocyte nuclear factor 4, $\alpha$                                        | 6.38044  | 6.80427  | 7.85574  | 8.51785 | 8.7933  | 7.55607 | 2.42097852   | 1.27559      | 2.42097852  | U p   | 0.031873362 | 0.403012098 |
| 728226 | GGTL C3   | $\Gamma$ -glutamyltransferase light chain 3                                  | 9.16157  | 9.31314  | 8.59698  | 7.48881 | 7.56931 | 5.95581 | -4.053739364 | -2.019253333 | 4.053739364 | Dow n | 0.003671527 | 0.23859853  |
| 23654  | PLXNB2    | Plexin B2                                                                    | 10.92635 | 10.05873 | 9.85906  | 8.99293 | 8.92649 | 9.47106 | -2.22101633  | -1.15122     | 2.22101633  | Dow n | 0.011250047 | 0.324854465 |
| 8329   | HIST1H2AI | Histone cluster 1, h2ai                                                      | 4.40129  | 3.07578  | 4.0012   | 7.16327 | 6.98146 | 5.71565 | 6.935644729  | 2.79403      | 6.935644729 | U p   | 0.00741761  | 0.173732248 |
| 285513 | GPRIN3    | GPRIN family member 3                                                        | 4.18034  | 3.59416  | 3.31549  | 5.80145 | 5.02294 | 4.23061 | 2.49952796   | 1.32167      | 2.49952796  | U p   | 0.01719054  | 0.360012938 |
| 42     | CIITA     | Class II, major                                                              | 5.       | 4.       | 5.       | 3.      | 4.      | 4.      | -2.          | -1.          | 2.3         | D     | 0.0         | 0.3         |



|        |         |                                                                                  |         |         |         |         |         |         |              |              |             |                  |             |             |
|--------|---------|----------------------------------------------------------------------------------|---------|---------|---------|---------|---------|---------|--------------|--------------|-------------|------------------|-------------|-------------|
| 61     |         | histocompatibility complex, transactivator                                       | 84291   | 92401   | 72211   | 51534   | 84774   | 36567   | 384070116    | 253426667    | 84070116    | o<br>w<br>n      | 17402627    | 60389823    |
| 84818  | IL17RC  | Interleukin 17 receptor C                                                        | 8.16985 | 8.46092 | 8.53021 | 6.99092 | 7.05018 | 7.91126 | -2.098764074 | -1.06954     | 2.098764074 | D<br>o<br>w<br>n | 0.00970699  | 0.316695318 |
| 283375 | SLC39A5 | Solute carrier family 39 (zinc transporter), member 5                            | 6.73982 | 6.25316 | 6.32724 | 8.27773 | 7.60155 | 6.70109 | 2.123901215  | 1.086716667  | 2.123901215 | U<br>p           | 0.033113393 | 0.406315059 |
| 23428  | SLC7A8  | Solute carrier family 7 (amino acid transporter light chain, L system), member 8 | 6.73749 | 9.30585 | 8.54974 | 6.46171 | 7.08793 | 5.15437 | -3.89878158  | -1.963023333 | 3.89878158  | D<br>o<br>w<br>n | 0.034170554 | 0.408273555 |
| 4312   | MMP1    | Matrix metalloproteinase 1                                                       | 5.54526 | 6.62785 | 8.97191 | 2.78101 | 5.92158 | 3.22258 | -8.417022652 | -3.07331     | 8.417022652 | D<br>o<br>w<br>n | 0.025582037 | 0.38482703  |
| 29760  | BLNK    | B-cell linker                                                                    | 6.36268 | 5.17316 | 5.71313 | 7.42832 | 7.20657 | 6.45637 | 2.429652521  | 1.28075      | 2.429652521 | U<br>p           | 0.013556609 | 0.342678485 |
| 13512  | NCOA7   | Nuclear receptor coactivator 7                                                   | 5.31096 | 4.48489 | 5.25519 | 5.26539 | 7.64925 | 7.72546 | 3.6376836    | 1.86302      | 3.6376836   | U<br>p           | 0.027710834 | 0.391408015 |
| 728841 | NBPF8   | Neuroblastoma breakpoint family member 8                                         | 6.53963 | 6.63459 | 6.41746 | 7.40056 | 7.69658 | 7.70662 | 2.100471678  | 1.0707133    | 2.100471678 | U<br>p           | 0.001292319 | 0.187107818 |
| 353091 | RAET1G  | Retinoic acid early transcript 1G                                                | 5.41502 | 5.18697 | 4.64681 | 6.32896 | 5.96492 | 7.31171 | 2.736370028  | 1.4522633    | 2.736370028 | U<br>p           | 0.007987247 | 0.299139554 |

|        |         |                                                     |          |         |         |          |           |          |              |             |             |                  |             |             |
|--------|---------|-----------------------------------------------------|----------|---------|---------|----------|-----------|----------|--------------|-------------|-------------|------------------|-------------|-------------|
| 1282   | COL4A1  | Collagen, type IV, $\alpha$ 1                       | 7.83442  | 7.71517 | 7.43233 | 8.95892  | 10.09358  | 8.16044  | 3.05323789   | 1.61034     | 3.05323789  | U<br>p           | 0.013690736 | 0.343500698 |
| 171177 | RHOV    | Ras homolog family member V                         | 3.87304  | 4.06875 | 4.13732 | 5.23802  | 4.22597   | 5.69224  | 2.03592      | 1.0257      | 2.03592     | U<br>p           | 0.027987458 | 0.392002337 |
| 11098  | PRSS23  | Protease, serine 23                                 | 8.47042  | 9.42572 | 8.20948 | 6.33418  | 8.24251   | 6.77771  | -2.997458    | -1.58374    | 2.997458    | D<br>o<br>w<br>n | 0.02438126  | 0.382664012 |
| 664    | BNIP3   | BCL2/adenovirus E1B 19kda interacting protein 3     | 7.3651   | 7.47063 | 7.07189 | 3.84333  | 5.61933   | 5.37383  | -5.12328837  | -2.35705333 | 5.12328837  | D<br>o<br>w<br>n | 0.001558672 | 0.187107818 |
| 3872   | KRT17   | Keratin 17, type I                                  | 5.27672  | 5.76972 | 5.5041  | 10.08662 | 5.67799   | 10.74934 | 11.21846461  | 3.4878033   | 11.21846461 | U<br>p           | 0.025881794 | 0.385401082 |
| 23281  | MTUS2   | Microtubule associated tumor suppressor candidate 2 | 5.33393  | 4.65271 | 4.51909 | 3.20961  | 3.27082   | 4.25753  | -2.388199459 | -1.25592333 | 2.388199459 | D<br>o<br>w<br>n | 0.068387    | 0.313660293 |
| 81671  | VMP1    | Vacuole membrane protein 1                          | 10.35736 | 8.72939 | 8.29673 | 9.88904  | 11.117332 | 11.74719 | 3.58512482   | 1.8420233   | 3.58512482  | U<br>p           | 0.027739772 | 0.391448674 |
| 445329 | SULT1A4 | Sulfotransferase family 1A member 4                 | 6.47722  | 6.93547 | 6.66106 | 7.80233  | 8.02899   | 7.66662  | 2.20594464   | 1.14139667  | 2.20594464  | U<br>p           | 0.0523801   | 0.187107818 |
| 387103 | CENPW   | Centromere protein W                                | 5.84319  | 5.52329 | 5.65403 | 6.3871   | 7.08305   | 6.90926  | 2.3342627    | 1.22296667  | 2.3342627   | U<br>p           | 0.0033937   | 0.23766     |

|                |              |                                             |                      |                     |                      |                     |                     |                     |                          |                          |                             |                  |                             |                             |
|----------------|--------------|---------------------------------------------|----------------------|---------------------|----------------------|---------------------|---------------------|---------------------|--------------------------|--------------------------|-----------------------------|------------------|-----------------------------|-----------------------------|
|                |              |                                             |                      |                     |                      |                     |                     |                     |                          |                          | 7                           |                  | 44                          | 6                           |
| 64<br>77       | SIAH1        | Siah E3 ubiquitin protein ligase 1          | 4.<br>58<br>41<br>8  | 4.<br>73<br>88      | 4.<br>56<br>13       | 6.<br>24<br>70      | 6.<br>04<br>65<br>1 | 5.<br>10<br>08<br>5 | 2.2<br>501<br>169<br>69  | 1.1<br>7                 | 2.2<br>50<br>11<br>69<br>69 | U<br>p           | 0.0<br>08<br>44<br>42<br>01 | 0.3<br>06<br>03<br>57<br>14 |
| 54<br>49<br>2  | NEUR<br>L1B  | Neuralized E3 ubiquitin protein ligase 1B   | 4.<br>08<br>59<br>1  | 4.<br>12<br>41<br>9 | 4.<br>25<br>58<br>9  | 4.<br>75<br>39<br>7 | 6.<br>61<br>57<br>6 | 5.<br>26<br>50<br>3 | 2.6<br>200<br>421<br>11  | 1.3<br>895<br>9          | 2.6<br>20<br>04<br>21<br>11 | U<br>p           | 0.0<br>18<br>65<br>58<br>57 | 0.3<br>65<br>23<br>18<br>69 |
| 56<br>34       | PRPS2        | Phosphoribosyl pyrophosphate synthetase 2   | 6.<br>97<br>49<br>8  | 7.<br>36<br>95<br>4 | 7.<br>20<br>95<br>2  | 8.<br>14<br>98<br>9 | 8.<br>86<br>57<br>3 | 7.<br>79<br>04<br>8 | 2.1<br>199<br>349<br>55  | 1.0<br>840<br>2          | 2.1<br>19<br>93<br>49<br>55 | U<br>p           | 0.0<br>11<br>12<br>72<br>43 | 0.3<br>24<br>61<br>19<br>79 |
| 57<br>18<br>7  | THOC<br>2    | THO complex 2                               | 3.<br>36<br>86<br>7  | 4.<br>04<br>50<br>4 | 4.<br>04<br>45<br>3  | 5.<br>06<br>20<br>2 | 5.<br>73<br>65<br>7 | 4.<br>28<br>40<br>3 | 2.3<br>103<br>744<br>08  | 1.2<br>081<br>266<br>67  | 2.3<br>10<br>37<br>44<br>08 | U<br>p           | 0.0<br>18<br>40<br>80<br>28 | 0.3<br>64<br>58<br>60<br>01 |
| 10<br>05<br>4  | UBA2         | Ubiquitin-like modifier activating enzyme 2 | 3.<br>82<br>36<br>5  | 4.<br>03<br>12<br>4 | 3.<br>76<br>62<br>3  | 4.<br>41<br>66<br>1 | 5.<br>41<br>38<br>3 | 5.<br>20<br>23<br>7 | 2.1<br>995<br>829<br>37  | 1.1<br>372<br>3          | 2.1<br>99<br>58<br>29<br>37 | U<br>p           | 0.0<br>05<br>38<br>29<br>93 | 0.2<br>69<br>32<br>15<br>26 |
| 64<br>22<br>5  | ATL2         | Atlantin gtpase 2                           | 4.<br>20<br>70<br>6  | 5.<br>35<br>59<br>1 | 4.<br>78<br>69<br>3  | 5.<br>64<br>73      | 5.<br>87<br>69<br>8 | 5.<br>99<br>05<br>6 | 2.0<br>776<br>894<br>04  | 1.0<br>549<br>8          | 2.0<br>77<br>68<br>94<br>04 | U<br>p           | 0.0<br>12<br>50<br>50<br>06 | 0.3<br>34<br>46<br>67<br>31 |
| 42<br>58       | MGST<br>2    | Microsomal glutathione S-transferase 2      | 10<br>.5<br>47<br>46 | 9.<br>37<br>47<br>4 | 10<br>.0<br>13<br>92 | 9.<br>50<br>78<br>2 | 8.<br>31<br>77      | 8.<br>49<br>26<br>5 | -2.<br>306<br>944<br>559 | -1.<br>205<br>983<br>333 | 2.3<br>06<br>94<br>45<br>59 | D<br>o<br>w<br>n | 0.0<br>25<br>23<br>96<br>7  | 0.3<br>83<br>71<br>27<br>62 |
| 57<br>16<br>7  | SALL4        | Spalt-like transcription factor 4           | 4.<br>92<br>40<br>8  | 4.<br>80<br>79      | 4.<br>93<br>75<br>6  | 5.<br>87<br>17<br>3 | 5.<br>31<br>66<br>3 | 7.<br>64<br>01<br>8 | 2.6<br>141<br>344<br>31  | 1.3<br>863<br>333<br>33  | 2.6<br>14<br>13<br>44<br>31 | U<br>p           | 0.0<br>43<br>32<br>33<br>15 | 0.4<br>32<br>33<br>09<br>01 |
| 25<br>49<br>58 | REXO<br>1L1P | REX1, RNA exonuclease 1, homolog-like 1,    | 5.<br>55<br>70       | 5.<br>00<br>13      | 5.<br>11<br>74       | 5.<br>51<br>53      | 7.<br>13<br>76      | 6.<br>27<br>46      | 2.1<br>197<br>929        | 1.0<br>839<br>233        | 2.1<br>19<br>79             | U<br>p           | 0.0<br>36<br>37             | 0.4<br>13<br>81             |

|                |             |                                                                        |                     |                      |                     |                     |                     |                     |                          |                          |                             |                  |                             |                             |
|----------------|-------------|------------------------------------------------------------------------|---------------------|----------------------|---------------------|---------------------|---------------------|---------------------|--------------------------|--------------------------|-----------------------------|------------------|-----------------------------|-----------------------------|
|                |             | pseudogene                                                             | 2                   | 9                    | 2                   |                     | 5                   | 5                   | 15                       | 33                       | 29                          |                  | 98                          | 69                          |
| 64<br>15<br>1  | NCAP<br>G   | Non-SMC<br>condensin I<br>complex subunit G                            | 6.<br>51<br>03<br>2 | 5.<br>92<br>15<br>9  | 6.<br>32<br>71<br>1 | 7.<br>96<br>76<br>5 | 8.<br>37<br>55<br>5 | 7.<br>20<br>81<br>3 | 3.0<br>260<br>517<br>64  | 1.5<br>974<br>366<br>67  | 3.0<br>26<br>05<br>17<br>64 | U<br>p           | 0.0<br>02<br>47<br>40<br>17 | 0.2<br>17<br>69<br>67<br>67 |
| 79<br>90<br>5  | TMC7        | Transmembrane<br>channel like 7                                        | 5.<br>55<br>38<br>1 | 5.<br>00<br>45<br>3  | 5.<br>82<br>99<br>2 | 8.<br>97<br>45      | 7.<br>19<br>11<br>7 | 8.<br>06<br>74<br>8 | 6.1<br>260<br>762<br>9   | 2.6<br>149<br>633<br>33  | 6.1<br>26<br>07<br>62<br>9  | U<br>p           | 0.0<br>00<br>87<br>83<br>44 | 0.1<br>81<br>04<br>09<br>24 |
| 23<br>31       | FMOD        | Fibromodulin                                                           | 8.<br>35<br>25<br>3 | 11<br>.3<br>64<br>62 | 9.<br>74<br>53<br>4 | 4.<br>93<br>62<br>4 | 7.<br>86<br>04      | 8.<br>06<br>87<br>1 | -7.<br>288<br>961<br>769 | -2.<br>865<br>713<br>333 | 7.2<br>88<br>96<br>17<br>69 | D<br>o<br>w<br>n | 0.0<br>27<br>53<br>46<br>39 | 0.3<br>90<br>33<br>04<br>89 |
| 22<br>99<br>6  | TTC39<br>A  | Tetratricopeptide<br>repeat domain 39A                                 | 6.<br>74<br>09<br>1 | 6.<br>56<br>01<br>8  | 6.<br>97<br>9       | 5.<br>65<br>85<br>6 | 5.<br>95<br>68<br>6 | 4.<br>94<br>76<br>6 | -2.<br>360<br>386<br>862 | -1.<br>239<br>023<br>333 | 2.3<br>60<br>38<br>68<br>62 | D<br>o<br>w<br>n | 0.0<br>04<br>95<br>43<br>64 | 0.2<br>63<br>34<br>97<br>33 |
| 21<br>46       | EZH2        | Enhancer of zeste<br>2 polycomb<br>repressive<br>complex 2 subunit     | 5.<br>29<br>68<br>8 | 4.<br>59<br>28<br>7  | 5.<br>22<br>27      | 6.<br>67<br>30<br>5 | 7.<br>05<br>61<br>9 | 5.<br>61<br>79<br>5 | 2.6<br>602<br>835<br>03  | 1.4<br>115<br>8          | 2.6<br>60<br>28<br>35<br>03 | U<br>p           | 0.0<br>10<br>88<br>81<br>09 | 0.3<br>23<br>87<br>84<br>16 |
| 62<br>52       | RTN1        | Reticulon 1                                                            | 8.<br>12<br>12<br>6 | 6.<br>68<br>12<br>7  | 7.<br>51<br>86      | 3.<br>92<br>70<br>9 | 5.<br>19<br>63<br>3 | 5.<br>37<br>02      | -6.<br>101<br>525<br>544 | -2.<br>609               | 6.1<br>01<br>52<br>55<br>44 | D<br>o<br>w<br>n | 0.0<br>01<br>31<br>39<br>1  | 0.1<br>87<br>10<br>78<br>18 |
| 98<br>37       | GINS1       | GINS complex<br>subunit 1 (Psf1<br>homolog)                            | 5.<br>08<br>3       | 4.<br>63<br>82<br>5  | 4.<br>86<br>21<br>5 | 6.<br>47<br>35<br>2 | 7.<br>24<br>34<br>6 | 6.<br>12<br>99<br>1 | 3.3<br>740<br>858<br>14  | 1.7<br>544<br>966<br>67  | 3.3<br>74<br>08<br>58<br>14 | U<br>p           | 0.0<br>01<br>00<br>21<br>14 | 0.1<br>86<br>14<br>79<br>2  |
| 25<br>44<br>28 | SLC41<br>A1 | Solute carrier<br>family 41<br>(magnesium<br>transporter),<br>member 1 | 6.<br>33<br>12<br>9 | 7.<br>57<br>04<br>8  | 7.<br>13<br>81<br>7 | 5.<br>76<br>95<br>3 | 5.<br>29<br>71<br>3 | 5.<br>85<br>04<br>2 | -2.<br>592<br>396<br>995 | -1.<br>374<br>286<br>667 | 2.5<br>92<br>39<br>69<br>95 | D<br>o<br>w<br>n | 0.0<br>06<br>34<br>72<br>88 | 0.2<br>83<br>73<br>24<br>96 |
| 15<br>77       | FAM9<br>1A1 | Family with<br>sequence                                                | 4.<br>23            | 4.<br>21             | 4.<br>29            | 5.<br>33            | 6.<br>13            | 4.<br>76            | 2.2<br>338               | 1.1<br>595               | 2.2<br>33                   | U<br>p           | 0.0<br>12                   | 0.3<br>34                   |

|                |             |                                                                                  |                     |                      |                     |                     |                     |                     |                          |                          |                             |                  |                             |                             |
|----------------|-------------|----------------------------------------------------------------------------------|---------------------|----------------------|---------------------|---------------------|---------------------|---------------------|--------------------------|--------------------------|-----------------------------|------------------|-----------------------------|-----------------------------|
| 69             |             | similarity 91 member A1                                                          | 83<br>5             | 77<br>4              | 61<br>3             | 01<br>8             | 94<br>1             | 12<br>4             | 567<br>4                 | 366<br>67                | 85<br>67<br>4               |                  | 40<br>70<br>29              | 46<br>67<br>31              |
| 11<br>05<br>1  | NUDT<br>21  | Nudix hydrolase<br>21                                                            | 4.<br>40<br>78<br>9 | 4.<br>00<br>98<br>1  | 4.<br>54<br>89<br>9 | 5.<br>52<br>77<br>6 | 6.<br>02<br>01<br>9 | 4.<br>77<br>42<br>6 | 2.1<br>712<br>211<br>31  | 1.1<br>185<br>066<br>67  | 2.1<br>71<br>22<br>11<br>31 | U<br>p           | 0.0<br>14<br>19<br>75<br>69 | 0.3<br>46<br>79<br>70<br>53 |
| 90<br>70<br>1  | SEC11<br>C  | SEC11 homolog<br>C, signal peptidase<br>complex subunit                          | 8.<br>48<br>90<br>8 | 10<br>.1<br>43<br>91 | 9.<br>24<br>75<br>9 | 8.<br>63<br>44<br>1 | 7.<br>83<br>44<br>9 | 6.<br>66<br>25<br>6 | -2.<br>996<br>004<br>935 | -1.<br>583<br>04         | 2.9<br>96<br>00<br>49<br>35 | D<br>o<br>w<br>n | 0.0<br>33<br>05<br>33<br>3  | 0.4<br>06<br>21<br>59<br>67 |
| 66<br>03<br>5  | SLC2A<br>11 | Solute carrier<br>family 2<br>(facilitated glucose<br>transporter),<br>member 11 | 5.<br>25<br>09<br>3 | 5.<br>71<br>96<br>5  | 5.<br>31<br>92<br>8 | 5.<br>14<br>19<br>8 | 4.<br>19<br>57<br>7 | 3.<br>78<br>54<br>5 | -2.<br>078<br>515<br>25  | -1.<br>055<br>553<br>333 | 2.0<br>78<br>51<br>52<br>5  | D<br>o<br>w<br>n | 0.0<br>23<br>43<br>23<br>09 | 0.3<br>80<br>86<br>14<br>11 |
| 43<br>54       | MPP1        | Membrane protein,<br>palmitoylated 1                                             | 5.<br>58<br>62<br>9 | 4.<br>71<br>04       | 4.<br>99<br>77<br>7 | 2.<br>49<br>54<br>1 | 5.<br>06<br>59<br>3 | 2.<br>94<br>56<br>4 | -3.<br>022<br>676<br>674 | -1.<br>595<br>826<br>667 | 3.0<br>22<br>67<br>66<br>74 | D<br>o<br>w<br>n | 0.0<br>44<br>46<br>15<br>86 | 0.4<br>35<br>28<br>98<br>64 |
| 90<br>61       | PAPSS<br>1  | 3'-phosphoadenosi<br>ne<br>5'-phosphosulfate<br>synthase 1                       | 8.<br>40<br>64<br>9 | 10<br>.0<br>75<br>97 | 9.<br>12<br>87<br>4 | 7.<br>76<br>65<br>2 | 8.<br>30<br>76<br>2 | 8.<br>17<br>53      | -2.<br>174<br>353<br>738 | -1.<br>120<br>586<br>667 | 2.1<br>74<br>35<br>37<br>38 | D<br>o<br>w<br>n | 0.0<br>35<br>36<br>21<br>65 | 0.4<br>10<br>04<br>57<br>87 |
| 54<br>80       | PPIC        | Peptidylprolyl<br>isomerase C<br>(cyclophilin C)                                 | 5.<br>55<br>73      | 5.<br>34<br>46<br>7  | 5.<br>16<br>57<br>9 | 6.<br>01<br>50<br>3 | 6.<br>66<br>32      | 6.<br>91<br>77      | 2.2<br>595<br>831<br>8   | 1.1<br>760<br>566<br>67  | 2.2<br>59<br>58<br>31<br>8  | U<br>p           | 0.0<br>04<br>60<br>55<br>51 | 0.2<br>54<br>41<br>63<br>12 |
| 15<br>54<br>65 | AGR3        | Anterior gradient<br>3, protein<br>disulphide<br>isomerase family<br>member      | 5.<br>64<br>48<br>7 | 5.<br>34<br>29<br>4  | 5.<br>33<br>84<br>5 | 8.<br>80<br>79<br>7 | 8.<br>65<br>03<br>8 | 6.<br>51<br>93<br>4 | 5.8<br>582<br>780<br>4   | 2.5<br>504<br>766<br>67  | 5.8<br>58<br>27<br>80<br>4  | U<br>p           | 0.0<br>03<br>71<br>82<br>17 | 0.2<br>38<br>59<br>85<br>3  |
| 85<br>42       | APOL<br>1   | Apolipoprotein L1                                                                | 8.<br>41<br>36<br>7 | 8.<br>66<br>27<br>9  | 8.<br>83<br>77<br>2 | 7.<br>99<br>89<br>6 | 7.<br>65<br>75      | 6.<br>78<br>61<br>2 | -2.<br>230<br>241<br>593 | -1.<br>157<br>2          | 2.2<br>30<br>24<br>15<br>93 | D<br>o<br>w<br>n | 0.0<br>12<br>25<br>77<br>29 | 0.3<br>33<br>39<br>53<br>91 |
| 79             | BEND        | BEN domain                                                                       | 6.                  | 5.                   | 6.                  | 5.                  | 5.                  | 5.                  | -2.                      | -1.                      | 2.0                         | D                | 0.0                         | 0.2                         |

|                           |                      |                                                                              |                     |                     |                     |                     |                     |                     |                          |                          |                             |                  |                             |                             |
|---------------------------|----------------------|------------------------------------------------------------------------------|---------------------|---------------------|---------------------|---------------------|---------------------|---------------------|--------------------------|--------------------------|-----------------------------|------------------|-----------------------------|-----------------------------|
| 65<br>6                   | 5                    | containing 5                                                                 | 59<br>78<br>8       | 82<br>75<br>5       | 10<br>21<br>7       | 04<br>87<br>6       | 01<br>30<br>1       | 42<br>64<br>4       | 018<br>285<br>125        | 013<br>13                | 18<br>28<br>51<br>25        | o<br>w<br>n      | 06<br>87<br>53<br>19        | 88<br>45<br>97<br>19        |
| 11<br>46<br>09            | TIRAP                | Toll-interleukin 1<br>receptor (TIR)<br>domain containing<br>adaptor protein | 6.<br>17<br>59<br>2 | 6.<br>39<br>85<br>2 | 6.<br>58<br>14<br>2 | 5.<br>48<br>84<br>8 | 4.<br>88<br>31<br>2 | 5.<br>36<br>79<br>2 | -2.<br>201<br>947<br>39  | -1.<br>138<br>78         | 2.2<br>01<br>94<br>73<br>9  | D<br>o<br>w<br>n | 0.0<br>02<br>41<br>16<br>44 | 0.2<br>15<br>53<br>16<br>8  |
| 10<br>27<br>23<br>46<br>2 | LOC10<br>272346<br>2 | Uncharacterized<br>LOC102723462                                              | 7.<br>46<br>14<br>8 | 7.<br>42<br>23<br>2 | 7.<br>32<br>89<br>1 | 7.<br>15<br>84<br>3 | 5.<br>30<br>81<br>1 | 5.<br>41<br>93<br>7 | -2.<br>717<br>474<br>819 | -1.<br>442<br>266<br>667 | 2.7<br>17<br>47<br>48<br>19 | D<br>o<br>w<br>n | 0.0<br>22<br>22<br>55<br>45 | 0.3<br>78<br>35<br>72<br>21 |
| 48<br>97                  | NRCA<br>M            | Neuronal cell<br>adhesion molecule                                           | 7.<br>03<br>54      | 6.<br>86<br>81<br>8 | 7.<br>59<br>53<br>6 | 4.<br>31<br>60<br>8 | 4.<br>94<br>78<br>8 | 4.<br>04<br>44<br>9 | -6.<br>635<br>307<br>534 | -2.<br>730<br>163<br>333 | 6.6<br>35<br>30<br>75<br>34 | D<br>o<br>w<br>n | 6.2<br>12<br>98<br>E-<br>05 | 0.1<br>15<br>58<br>79<br>66 |
| 55<br>42<br>36            | DPY19<br>L2P1        | DPY19L2<br>pseudogene 1                                                      | 4.<br>65<br>20<br>6 | 3.<br>31<br>09<br>2 | 3.<br>19<br>81<br>9 | 4.<br>85<br>36<br>3 | 5.<br>39<br>53<br>4 | 5.<br>51<br>77<br>1 | 2.8<br>982<br>258<br>01  | 1.5<br>351<br>7          | 2.8<br>98<br>22<br>58<br>01 | U<br>p           | 0.0<br>08<br>07<br>09<br>57 | 0.2<br>99<br>13<br>95<br>54 |
| 84<br>41<br>9             | C15orf<br>48         | Chromosome 15<br>open reading<br>frame 48                                    | 4.<br>74<br>54<br>6 | 4.<br>74<br>79<br>2 | 5.<br>03<br>68<br>5 | 5.<br>64<br>55      | 10<br>.3<br>09<br>4 | 7.<br>15<br>93<br>9 | 7.2<br>669<br>668<br>91  | 2.8<br>613<br>533<br>33  | 7.2<br>66<br>96<br>68<br>91 | U<br>p           | 0.0<br>31<br>18<br>68<br>16 | 0.4<br>00<br>46<br>67<br>53 |
| 11<br>13<br>2             | CAPN<br>10           | Calpain 10                                                                   | 3.<br>60<br>01<br>2 | 3.<br>97<br>12      | 4.<br>20<br>73<br>1 | 5.<br>34<br>20<br>1 | 5.<br>22<br>35<br>7 | 4.<br>66<br>52<br>2 | 2.2<br>202<br>518<br>47  | 1.1<br>507<br>233<br>33  | 2.2<br>20<br>25<br>18<br>47 | U<br>p           | 0.0<br>03<br>19<br>05<br>6  | 0.2<br>34<br>23<br>93<br>82 |
| 54<br>66<br>5             | RSBN<br>1            | Round spermatid<br>basic protein 1                                           | 4.<br>88<br>62<br>9 | 5.<br>24<br>61<br>2 | 5.<br>18<br>44<br>3 | 6.<br>49<br>86<br>1 | 6.<br>27<br>47<br>9 | 5.<br>61<br>29<br>6 | 2.0<br>323<br>844<br>53  | 1.0<br>231<br>733<br>33  | 2.0<br>32<br>38<br>44<br>53 | U<br>p           | 0.0<br>08<br>55<br>96<br>07 | 0.3<br>07<br>29<br>63<br>95 |
| 59<br>62                  | RDX                  | Radixin                                                                      | 7.<br>02<br>06<br>6 | 6.<br>52<br>12      | 6.<br>12<br>28<br>1 | 4.<br>90<br>58<br>7 | 6.<br>29<br>77<br>8 | 5.<br>13<br>58<br>5 | -2.<br>156<br>049<br>05  | -1.<br>108<br>39         | 2.1<br>56<br>04<br>90<br>5  | D<br>o<br>w<br>n | 0.0<br>34<br>70<br>71<br>3  | 0.4<br>08<br>42<br>39<br>81 |

|          |           |                                                                                                                        |          |         |         |         |         |         |              |              |             |                  |             |             |
|----------|-----------|------------------------------------------------------------------------------------------------------------------------|----------|---------|---------|---------|---------|---------|--------------|--------------|-------------|------------------|-------------|-------------|
| 10013393 | SNOR D12B | Small nucleolar RNA, C/D box 12B                                                                                       | 4.14084  | 3.6744  | 3.91184 | 4.76666 | 4.38766 | 6.61438 | 2.5441904    | 1.3472066    | 2.5441904   | U<br>p           | 0.046178699 | 0.439638311 |
| 11001    | SLC27 A2  | Solute carrier family 27 (fatty acid transporter), member 2                                                            | 5.90361  | 4.54743 | 4.60748 | 6.70221 | 7.45584 | 5.33622 | 2.786716     | 1.4785833    | 2.786716    | U<br>p           | 0.045090639 | 0.436078937 |
| 56667    | MUC13     | Mucin 13, cell surface associated                                                                                      | 7.8298   | 7.27881 | 7.05255 | 7.89636 | 8.38773 | 8.98213 | 2.049142053  | 1.03502      | 2.049142053 | U<br>p           | 0.02132345  | 0.373026178 |
| 6715     | SRD5 A1   | Steroid-5- $\alpha$ -reductase, $\alpha$ polypeptide 1 (3-oxo-5 $\alpha$ -steroid $\Delta$ 4-dehydrogenase $\alpha$ 1) | 3.89286  | 3.72647 | 3.74285 | 5.024   | 5.57044 | 4.02861 | 2.124254567  | 1.086956667  | 2.124254567 | U<br>p           | 0.02407193  | 0.381896949 |
| 2286     | FKBP2     | FK506 binding protein 2                                                                                                | 8.22249  | 8.9038  | 8.20027 | 7.2882  | 7.32087 | 7.50877 | -2.098511933 | -1.0693667   | 2.098511933 | D<br>o<br>w<br>n | 0.004679701 | 0.256554706 |
| 10468    | FST       | Follistatin                                                                                                            | 6.41395  | 6.94683 | 7.38565 | 5.74398 | 5.37272 | 5.92861 | -2.351704296 | -1.233706667 | 2.351704296 | D<br>o<br>w<br>n | 0.005213631 | 0.266845614 |
| 7448     | VTN       | Vitronectin                                                                                                            | 11.85274 | 8.86273 | 9.45855 | 5.41674 | 7.65989 | 5.92183 | -13.22491612 | -3.725186667 | 13.22491612 | D<br>o<br>w<br>n | 0.004072456 | 0.24425172  |
| 10497    | UNC13B    | Unc-13 homolog B (C. Elegans)                                                                                          | 6.83918  | 7.56269 | 7.62566 | 5.58896 | 5.70128 | 5.02091 | -3.746283293 | -1.9054628   | 3.746283293 | D<br>o<br>w<br>n | 0.00486797  | 0.164248294 |
| 5034     | P4HB      | Prolyl 4-hydroxylase, $\beta$ polypeptide                                                                              | 10.756   | 11.831  | 11.4480 | 10.742  | 10.405  | 9.7037  | -2.102996    | -1.072446    | 2.102996    | D<br>o<br>w      | 0.02623     | 0.38731     |

|    |       |                     |    |    |    |    |    |    |     |     |     |   |     |     |
|----|-------|---------------------|----|----|----|----|----|----|-----|-----|-----|---|-----|-----|
|    |       |                     | 39 | 49 | 94 | 61 | 09 | 8  | 817 | 667 | 68  | n | 12  | 24  |
|    |       |                     |    |    |    |    |    |    |     |     | 17  |   | 5   | 42  |
| 24 | CLDN  | Claudin 15          | 5. | 5. | 5. | 7. | 7. | 5. | 2.5 | 1.3 | 2.5 | U | 0.0 | 0.4 |
| 14 | 15    |                     | 23 | 56 | 68 | 27 | 85 | 48 | 992 | 780 | 99  | p | 49  | 46  |
| 6  |       |                     | 32 | 03 | 16 | 33 | 42 | 18 | 042 | 7   | 20  |   | 89  | 67  |
|    |       |                     | 1  | 5  |    |    | 2  | 5  | 36  |     | 42  |   | 32  | 29  |
|    |       |                     |    |    |    |    |    |    |     |     | 36  |   | 89  | 81  |
| 72 | HIST2 | Histone cluster 2,  | 10 | 9. | 9. | 11 | 11 | 10 | 2.3 | 1.2 | 2.3 | U | 0.0 | 0.3 |
| 37 | H2AA  | h2aa4               | .4 | 12 | 52 | .0 | .2 | .4 | 006 | 020 | 00  | p | 20  | 71  |
| 90 | 4     |                     | 75 | 07 | 91 | 78 | 34 | 18 | 900 | 666 | 69  |   | 74  | 73  |
|    |       |                     | 23 | 4  | 4  | 25 | 59 | 47 | 99  | 67  | 00  |   | 91  | 76  |
|    |       |                     |    |    |    |    |    |    |     |     | 99  |   | 62  | 6   |
| 14 | CST3  | Cystatin C          | 11 | 11 | 11 | 10 | 10 | 10 | -2. | -1. | 2.1 | D | 0.0 | 0.2 |
| 71 |       |                     | .7 | .3 | .7 | .9 | .1 | .4 | 132 | 092 | 32  | o | 04  | 53  |
|    |       |                     | 14 | 36 | 59 | 14 | 84 | 34 | 205 | 346 | 20  | w | 50  | 49  |
|    |       |                     | 56 | 27 | 7  | 7  | 3  | 49 | 76  | 667 | 57  | n | 50  | 44  |
|    |       |                     |    |    |    |    |    |    |     |     | 6   |   | 76  | 23  |
| 29 | RACG  | Rac gtpase          | 6. | 5. | 5. | 6. | 7. | 6. | 2.1 | 1.1 | 2.1 | U | 0.0 | 0.3 |
| 12 | API   | activating protein  | 09 | 56 | 95 | 48 | 87 | 55 | 468 | 022 | 46  | p | 31  | 99  |
| 7  | 1     |                     | 86 | 04 | 76 | 78 | 87 | 69 | 925 | 5   | 89  |   | 02  | 78  |
|    |       |                     | 7  | 9  | 7  | 9  | 5  | 4  | 69  |     | 25  |   | 52  | 54  |
|    |       |                     |    |    |    |    |    |    |     |     | 69  |   | 81  | 61  |
| 25 | AMBP  | A-1-microglobulin   | 11 | 6. | 7. | 6. | 5. | 5. | -6. | -2. | 6.7 | D | 0.0 | 0.4 |
| 9  |       | /bikunin precursor  | .4 | 97 | 30 | 59 | 66 | 24 | 700 | 744 | 00  | o | 49  | 46  |
|    |       |                     | 61 | 83 | 05 | 22 | 65 | 90 | 753 | 323 | 75  | w | 14  | 17  |
|    |       |                     | 92 | 2  | 9  | 3  | 5  | 8  | 489 | 333 | 34  | n | 79  | 48  |
|    |       |                     |    |    |    |    |    |    |     |     | 89  |   | 14  |     |
| 41 | CD46  | CD46 molecule,      | 6. | 6. | 7. | 8. | 8. | 8. | 2.9 | 1.5 | 2.9 | U | 0.0 | 0.1 |
| 79 |       | complement          | 88 | 84 | 03 | 48 | 84 | 04 | 006 | 363 | 00  | p | 00  | 67  |
|    |       | regulatory protein  | 70 | 82 | 41 | 44 | 66 | 75 | 776 | 9   | 67  |   | 60  | 78  |
|    |       |                     | 8  | 5  | 3  | 4  | 3  | 6  | 92  |     | 76  |   | 55  | 26  |
|    |       |                     |    |    |    |    |    |    |     |     | 92  |   | 28  | 85  |
| 10 | TVP23 | TVP23C-CDRT4        | 6. | 7. | 7. | 5. | 5. | 6. | -2. | -1. | 2.4 | D | 0.0 | 0.3 |
| 05 | C-CDR | readthrough         | 26 | 62 | 62 | 80 | 56 | 24 | 457 | 297 | 57  | o | 17  | 61  |
| 33 | T4    |                     | 23 | 14 | 44 | 81 | 61 | 24 | 452 | 163 | 45  | w | 55  | 12  |
| 49 |       |                     |    |    | 4  | 1  | 4  |    | 163 | 333 | 21  | n | 87  | 33  |
| 6  |       |                     |    |    |    |    |    |    |     |     | 63  |   | 15  | 37  |
| 16 | TMTC  | Transmembrane       | 6. | 6. | 6. | 5. | 5. | 5. | -2. | -1. | 2.0 | D | 0.0 | 0.2 |
| 03 | 2     | and                 | 27 | 73 | 24 | 26 | 34 | 58 | 029 | 021 | 29  | o | 03  | 34  |
| 35 |       | tetratricopeptide   | 96 | 30 | 07 | 09 | 14 | 75 | 568 | 173 | 56  | w | 04  | 00  |
|    |       | repeat containing 2 |    | 9  | 6  | 3  | 9  | 1  | 922 | 333 | 89  | n | 16  | 38  |
|    |       |                     |    |    |    |    |    |    |     |     | 22  |   | 71  | 89  |
| 65 | SLC5A | Solute carrier      | 3. | 3. | 3. | 6. | 5. | 4. | 2.5 | 1.3 | 2.5 | U | 0.0 | 0.3 |
| 26 | 3     | family 5            | 90 | 81 | 81 | 14 | 11 | 30 | 296 | 389 | 29  | p | 18  | 63  |



|           |               |                                                             |         |         |         |         |         |         |             |              |             |                  |           |           |
|-----------|---------------|-------------------------------------------------------------|---------|---------|---------|---------|---------|---------|-------------|--------------|-------------|------------------|-----------|-----------|
|           |               | (sodium/myo-inositol cotransporter), member 3               | 805     | 96      | 161     | 2       | 189     | 223     | 77256       | 53333        | 6772        |                  | 0626      | 0582      |
| 79853     | TM4S<br>F20   | Transmembrane 4 L six family member 20                      | 3.95205 | 3.73725 | 3.65284 | 5.9351  | 7.81276 | 5.29199 | 5.9212564   | 2.5659033    | 5.9212564   | U<br>p           | 0.0038436 | 0.2389072 |
| 55701     | ARHG<br>EF40  | Rho guanine nucleotide exchange factor (GEF) 40             | 6.8562  | 6.95002 | 7.53392 | 6.84006 | 5.5889  | 5.69664 | -2.10163675 | -1.071513333 | 2.10163675  | D<br>o<br>w<br>n | 0.0289846 | 0.3940729 |
| 3157      | HMGC<br>S1    | 3-hydroxy-3-methylglutaryl-coa synthase 1                   | 5.16111 | 3.90118 | 4.12982 | 4.79237 | 5.68318 | 5.90358 | 2.08831595  | 1.06234      | 2.08831595  | U<br>p           | 0.0415039 | 0.4279166 |
| 3918      | LAMC<br>2     | Laminin subunit $\gamma$ 2                                  | 5.9852  | 5.13681 | 5.57942 | 6.74871 | 7.25207 | 9.14518 | 4.4326721   | 2.1481766    | 4.4326721   | U<br>p           | 0.0100956 | 0.3180092 |
| 57678     | GPAM          | Glycerol-3-phosphate acyltransferase, mitochondrial         | 6.67115 | 7.33119 | 5.99032 | 5.18538 | 5.37361 | 5.29063 | -2.60451245 | -1.381013333 | 2.60451245  | D<br>o<br>w<br>n | 0.0055045 | 0.2698357 |
| 353497    | POLN          | Polymerase (DNA directed) nu                                | 5.05352 | 5.88572 | 5.27035 | 3.81935 | 4.41728 | 4.11241 | -2.49696848 | -1.320176667 | 2.49696848  | D<br>o<br>w<br>n | 0.0019332 | 0.1986750 |
| 1968      | EIF2S3        | Eukaryotic translation initiation factor 2 subunit $\gamma$ | 7.79363 | 7.48226 | 7.72689 | 8.91889 | 9.27964 | 8.10425 | 2.143591499 | 1.10003      | 2.143591499 | U<br>p           | 0.0128820 | 0.3361741 |
| 100133161 | LINC0<br>1001 | Long intergenic non-protein coding RNA 1001                 | 8.03359 | 8.30848 | 7.49201 | 5.71049 | 6.09297 | 7.81824 | -2.64657235 | -1.404126667 | 2.64657235  | D<br>o<br>w<br>n | 0.0400582 | 0.4243594 |
| 11        | MID2          | Midline 2                                                   | 7.      | 5.      | 6.      | 4.      | 5.      | 5.      | -2.         | -1.          | 2.9         | D                | 0.0       | 0.3       |

|                |                    |                                                                                          |                     |                      |                      |                     |                     |                      |                          |                          |                             |                  |                             |                             |
|----------------|--------------------|------------------------------------------------------------------------------------------|---------------------|----------------------|----------------------|---------------------|---------------------|----------------------|--------------------------|--------------------------|-----------------------------|------------------|-----------------------------|-----------------------------|
| 04<br>3        |                    |                                                                                          | 46<br>26<br>6       | 42<br>16<br>8        | 94<br>36             | 57<br>69<br>6       | 33<br>96<br>5       | 28<br>65<br>2        | 911<br>178<br>564        | 541<br>603<br>333        | 11<br>17<br>85<br>64        | o<br>w<br>n      | 23<br>44<br>00<br>79        | 80<br>86<br>14<br>11        |
| 52<br>65       | SERPI<br>NA1       | Serpin peptidase inhibitor, clade A ( $\alpha$ -1 antiproteinase, antitrypsin), member 1 | 9.<br>41<br>07<br>1 | 12<br>.3<br>48<br>36 | 12<br>.5<br>79<br>29 | 7.<br>21<br>68<br>1 | 8.<br>82<br>58<br>6 | 10<br>.2<br>00<br>57 | -6.<br>490<br>696<br>657 | -2.<br>698<br>373<br>333 | 6.4<br>90<br>69<br>66<br>57 | D<br>o<br>w<br>n | 0.0<br>34<br>86<br>72<br>97 | 0.4<br>08<br>42<br>81<br>41 |
| 10<br>17       | CDK2               | Cyclin-dependent kinase 2                                                                | 6.<br>87<br>66      | 6.<br>86<br>56<br>6  | 7.<br>20<br>00<br>7  | 9.<br>10<br>69<br>6 | 8.<br>15<br>32<br>8 | 7.<br>44<br>40<br>3  | 2.3<br>849<br>846<br>82  | 1.2<br>539<br>8          | 2.3<br>84<br>98<br>46<br>82 | U<br>p           | 0.0<br>20<br>34<br>90<br>21 | 0.3<br>71<br>13<br>26<br>99 |
| 30<br>73       | HEXA               | Hexosaminidase A ( $\alpha$ polypeptide)                                                 | 9.<br>12<br>54<br>4 | 8.<br>85<br>06<br>4  | 8.<br>71<br>03<br>6  | 7.<br>20<br>11<br>9 | 7.<br>62<br>36<br>7 | 8.<br>79<br>70<br>8  | -2.<br>030<br>028<br>526 | -1.<br>021<br>5          | 2.0<br>30<br>02<br>85<br>26 | D<br>o<br>w<br>n | 0.0<br>44<br>84<br>09<br>23 | 0.4<br>35<br>52<br>77<br>14 |
| 72<br>91<br>71 | ANKR<br>D20A8<br>P | Ankyrin repeat domain 20 family member A8, pseudogene                                    | 7.<br>46<br>14<br>8 | 7.<br>42<br>23<br>2  | 7.<br>32<br>89<br>1  | 7.<br>15<br>84<br>3 | 5.<br>30<br>81<br>1 | 5.<br>41<br>93<br>7  | -2.<br>717<br>474<br>819 | -1.<br>442<br>266<br>667 | 2.7<br>17<br>47<br>48<br>19 | D<br>o<br>w<br>n | 0.0<br>22<br>22<br>55<br>45 | 0.3<br>78<br>35<br>72<br>21 |
| 53<br>90<br>5  | DUOX<br>1          | Dual oxidase 1                                                                           | 5.<br>52<br>09<br>1 | 5.<br>93<br>14<br>5  | 7.<br>72<br>87<br>5  | 4.<br>52<br>11<br>4 | 4.<br>42<br>02<br>9 | 5.<br>54<br>3        | -2.<br>959<br>923<br>727 | -1.<br>565<br>56         | 2.9<br>59<br>92<br>37<br>27 | D<br>o<br>w<br>n | 0.0<br>37<br>31<br>24<br>76 | 0.4<br>16<br>34<br>38<br>48 |
| 10<br>58       | CENP<br>A          | Centromere protein A                                                                     | 4.<br>39<br>71<br>5 | 4.<br>29<br>43<br>3  | 4.<br>46<br>27<br>6  | 5.<br>76<br>89<br>9 | 5.<br>90<br>67<br>6 | 4.<br>73<br>89<br>4  | 2.1<br>240<br>484<br>38  | 1.0<br>868<br>166<br>67  | 2.1<br>24<br>04<br>84<br>38 | U<br>p           | 0.0<br>13<br>04<br>07<br>28 | 0.3<br>36<br>17<br>41<br>55 |
| 16<br>55<br>45 | DQX1               | DEAQ box RNA-dependent atpase 1                                                          | 4.<br>61<br>22<br>6 | 5.<br>09<br>57<br>5  | 5.<br>79<br>31<br>5  | 8.<br>05<br>27<br>4 | 6.<br>69<br>73<br>2 | 5.<br>43<br>89<br>2  | 2.9<br>538<br>911<br>55  | 1.5<br>626<br>166<br>67  | 2.9<br>53<br>89<br>11<br>55 | U<br>p           | 0.0<br>48<br>87<br>67<br>04 | 0.4<br>46<br>17<br>48       |
| 10<br>16<br>1  | LPAR6              | Lysophosphatidic acid receptor 6                                                         | 7.<br>61<br>87<br>7 | 7.<br>84<br>50<br>8  | 6.<br>97<br>16<br>6  | 6.<br>91<br>23<br>8 | 6.<br>05<br>10<br>1 | 6.<br>01<br>72       | -2.<br>221<br>663<br>01  | -1.<br>151<br>64         | 2.2<br>21<br>66<br>30       | D<br>o<br>w<br>n | 0.0<br>13<br>66<br>94       | 0.3<br>43<br>50<br>06       |

|                           |                      |                                                                                                                                       |                     |                     |                     |                     |                     |                     |                          |                          |                             |                  |                             |                             |
|---------------------------|----------------------|---------------------------------------------------------------------------------------------------------------------------------------|---------------------|---------------------|---------------------|---------------------|---------------------|---------------------|--------------------------|--------------------------|-----------------------------|------------------|-----------------------------|-----------------------------|
|                           |                      |                                                                                                                                       |                     |                     |                     |                     |                     |                     |                          |                          | 1                           |                  | 47                          | 98                          |
| 84<br>30<br>4             | NUDT<br>22           | Nudix hydrolase<br>22                                                                                                                 | 6.<br>36<br>05<br>3 | 6.<br>12<br>30<br>2 | 6.<br>19<br>42<br>4 | 4.<br>37<br>77<br>6 | 5.<br>23<br>26<br>2 | 5.<br>05<br>66<br>1 | -2.<br>526<br>137<br>789 | -1.<br>336<br>933<br>333 | 2.5<br>26<br>13<br>77<br>89 | D<br>o<br>w<br>n | 0.0<br>01<br>73<br>30<br>74 | 0.1<br>91<br>04<br>98<br>66 |
| 16<br>1                   | AP2A2                | Adaptor-related<br>protein complex 2,<br>$\alpha$ 2 subunit                                                                           | 8.<br>27<br>25<br>3 | 7.<br>94<br>29<br>2 | 8.<br>10<br>31<br>8 | 6.<br>60<br>29<br>7 | 6.<br>94<br>95<br>8 | 6.<br>59<br>36<br>8 | -2.<br>622<br>288<br>953 | -1.<br>390<br>826<br>667 | 2.6<br>22<br>28<br>89<br>53 | D<br>o<br>w<br>n | 0.0<br>00<br>39<br>18<br>88 | 0.1<br>60<br>90<br>15<br>41 |
| 81<br>61<br>8             | ITM2C                | Integral membrane<br>protein 2C                                                                                                       | 6.<br>58<br>73<br>1 | 8.<br>18<br>08<br>4 | 7.<br>53<br>75<br>2 | 9.<br>69<br>11<br>2 | 9.<br>65<br>81<br>2 | 9.<br>63<br>49<br>1 | 4.6<br>788<br>695<br>31  | 2.2<br>261<br>6          | 4.6<br>78<br>86<br>95<br>31 | U<br>p           | 0.0<br>00<br>84<br>98<br>04 | 0.1<br>81<br>04<br>09<br>24 |
| 23<br>50<br>0             | DAAM<br>2            | Dishevelled<br>associated<br>activator of<br>morphogenesis 2                                                                          | 4.<br>52<br>81<br>5 | 7.<br>56<br>55<br>3 | 7.<br>35<br>20<br>5 | 4.<br>10<br>06<br>5 | 5.<br>15<br>41<br>5 | 4.<br>08<br>05<br>3 | -4.<br>103<br>343<br>698 | -2.<br>036<br>8          | 4.1<br>03<br>34<br>36<br>98 | D<br>o<br>w<br>n | 0.0<br>40<br>47<br>91<br>83 | 0.4<br>25<br>93<br>08<br>38 |
| 10<br>50<br>7             | SEMA<br>4D           | Sema domain,<br>immunoglobulin<br>domain (Ig),<br>transmembrane<br>domain (TM) and<br>short cytoplasmic<br>domain,<br>(semaphorin) 4D | 6.<br>62<br>73<br>7 | 6.<br>45<br>35<br>7 | 6.<br>37<br>25<br>6 | 5.<br>91<br>49<br>2 | 5.<br>01<br>46<br>2 | 5.<br>41<br>04<br>2 | -2.<br>053<br>170<br>352 | -1.<br>037<br>853<br>333 | 2.0<br>53<br>17<br>03<br>52 | D<br>o<br>w<br>n | 0.0<br>06<br>99<br>08<br>23 | 0.2<br>88<br>96<br>44<br>72 |
| 71<br>72                  | TPMT                 | Thiopurine<br>S-methyltransferase                                                                                                     | 5.<br>09<br>75<br>8 | 5.<br>34<br>07<br>5 | 5.<br>29<br>12<br>5 | 6.<br>34<br>48<br>3 | 7.<br>41<br>79<br>1 | 5.<br>64<br>86      | 2.3<br>412<br>083<br>57  | 1.2<br>272<br>533<br>33  | 2.3<br>41<br>20<br>83<br>57 | U<br>p           | 0.0<br>25<br>79<br>34<br>94 | 0.3<br>85<br>33<br>44<br>54 |
| 10<br>10<br>59<br>93<br>5 | LOC10<br>105993<br>5 | Coiled-coil<br>domain-containing<br>protein 29-like                                                                                   | 7.<br>46<br>14<br>8 | 7.<br>42<br>23<br>2 | 7.<br>32<br>89<br>1 | 7.<br>15<br>84<br>3 | 5.<br>30<br>81<br>1 | 5.<br>41<br>93<br>7 | -2.<br>717<br>474<br>819 | -1.<br>442<br>266<br>667 | 2.7<br>17<br>47<br>48<br>19 | D<br>o<br>w<br>n | 0.0<br>22<br>22<br>55<br>45 | 0.3<br>78<br>35<br>72<br>21 |
| 50<br>67                  | CNTN<br>3            | Contactin 3<br>(plasmacytoma<br>associated)                                                                                           | 6.<br>75<br>50<br>9 | 6.<br>98<br>58<br>4 | 7.<br>19<br>01<br>2 | 5.<br>59<br>10<br>1 | 4.<br>12<br>20<br>4 | 5.<br>41<br>04<br>2 | -3.<br>826<br>061<br>331 | -1.<br>935<br>86         | 3.8<br>26<br>06<br>13<br>31 | D<br>o<br>w<br>n | 0.0<br>02<br>11<br>97<br>03 | 0.2<br>07<br>03<br>67       |

|                           |                        |                                                               |                     |                     |                     |                     |                     |                     |                          |                          |                             |                  |                             |                             |
|---------------------------|------------------------|---------------------------------------------------------------|---------------------|---------------------|---------------------|---------------------|---------------------|---------------------|--------------------------|--------------------------|-----------------------------|------------------|-----------------------------|-----------------------------|
| 58<br>51<br>6             | FAM6<br>0A             | Family with<br>sequence<br>similarity<br>member A             | 6.<br>06<br>86<br>6 | 5.<br>61<br>90<br>7 | 5.<br>91<br>70<br>4 | 7.<br>74<br>06<br>9 | 7.<br>44<br>74<br>4 | 6.<br>11<br>09<br>2 | 2.3<br>479<br>906<br>55  | 1.2<br>314<br>266<br>67  | 2.3<br>47<br>99<br>06<br>55 | U<br>p           | 0.0<br>25<br>60<br>16<br>37 | 0.3<br>84<br>82<br>70<br>3  |
| 10<br>02<br>88<br>11<br>4 | LOC10<br>028811<br>4   | Uncharacterized<br>LOC100288114                               | 7.<br>52<br>50<br>3 | 7.<br>83<br>96<br>7 | 8.<br>09<br>46<br>8 | 4.<br>39<br>71<br>5 | 6.<br>59<br>93<br>6 | 5.<br>51<br>95<br>2 | -4.<br>974<br>149<br>952 | -2.<br>314<br>45         | 4.9<br>74<br>14<br>99<br>52 | D<br>o<br>w<br>n | 0.0<br>03<br>42<br>97<br>35 | 0.2<br>37<br>14<br>66<br>6  |
| 87<br>63                  | CD164                  | CD164 molecule,<br>sialomucin                                 | 9.<br>90<br>49<br>3 | 9.<br>50<br>12<br>3 | 9.<br>63<br>28<br>6 | 8.<br>17<br>17<br>4 | 8.<br>80<br>69      | 8.<br>44<br>16<br>4 | -2.<br>307<br>365<br>681 | -1.<br>206<br>246<br>667 | 2.3<br>07<br>36<br>56<br>81 | D<br>o<br>w<br>n | 0.0<br>01<br>93<br>42<br>61 | 0.1<br>98<br>67<br>50<br>21 |
| 54<br>79<br>8             | DCHS<br>2              | Dachsous<br>cadherin-related 2                                | 5.<br>62<br>71<br>5 | 6.<br>32<br>23<br>2 | 6.<br>95<br>12<br>7 | 4.<br>06<br>25<br>8 | 4.<br>50<br>29<br>8 | 4.<br>07<br>57      | -4.<br>247<br>144<br>91  | -2.<br>086<br>493<br>333 | 4.2<br>47<br>14<br>49<br>1  | D<br>o<br>w<br>n | 0.0<br>00<br>63<br>93<br>36 | 0.1<br>72<br>63<br>18<br>47 |
| 12<br>96<br>42            | MBOA<br>T2             | Membrane bound<br>O-acyltransferase<br>domain containing<br>2 | 4.<br>60<br>31<br>6 | 4.<br>21<br>94<br>5 | 5.<br>05<br>23<br>8 | 5.<br>77<br>65<br>4 | 6.<br>77<br>84<br>2 | 6.<br>98<br>33<br>8 | 3.7<br>006<br>618<br>98  | 1.8<br>877<br>833<br>33  | 3.7<br>00<br>66<br>18<br>98 | U<br>p           | 0.0<br>01<br>69<br>12<br>95 | 0.1<br>89<br>87<br>70<br>31 |
| 10<br>05<br>28<br>01<br>9 | HSPB2<br>-c11orf<br>52 | HSPB2-c11orf52<br>readthrough<br>(NMD candidate)              | 6.<br>60<br>85<br>9 | 6.<br>14<br>75<br>6 | 6.<br>22<br>97<br>8 | 4.<br>51<br>20<br>8 | 4.<br>94<br>78<br>8 | 5.<br>35<br>58<br>2 | -2.<br>620<br>877<br>639 | -1.<br>390<br>05         | 2.6<br>20<br>87<br>76<br>39 | D<br>o<br>w<br>n | 0.0<br>01<br>62<br>65<br>58 | 0.1<br>88<br>01<br>18<br>53 |
| 27<br>64                  | GMFB                   | Glia maturation<br>factor, $\beta$                            | 4.<br>60<br>85<br>8 | 4.<br>33<br>57<br>4 | 4.<br>74<br>42<br>1 | 5.<br>08<br>49<br>7 | 6.<br>30<br>65<br>4 | 6.<br>15<br>21<br>4 | 2.4<br>368<br>880<br>91  | 1.2<br>850<br>4          | 2.4<br>36<br>88<br>80<br>91 | U<br>p           | 0.0<br>08<br>15<br>40<br>39 | 0.3<br>01<br>10<br>59<br>84 |
| 56<br>93<br>8             | ARNT<br>L2             | Aryl hydrocarbon<br>receptor nuclear<br>translocator like 2   | 4.<br>42<br>31      | 4.<br>10<br>66<br>8 | 4.<br>48<br>49<br>2 | 5.<br>57<br>39<br>3 | 6.<br>27<br>04<br>7 | 5.<br>15<br>09<br>8 | 2.5<br>086<br>189<br>26  | 1.3<br>268<br>933<br>33  | 2.5<br>08<br>61<br>89<br>26 | U<br>p           | 0.0<br>03<br>89<br>41<br>46 | 0.2<br>39<br>96<br>90<br>73 |
| 37<br>52<br>98            | CERK<br>L              | Ceramide kinase<br>like                                       | 5.<br>16<br>52<br>9 | 3.<br>88<br>90<br>1 | 4.<br>48<br>31<br>9 | 6.<br>51<br>70<br>1 | 5.<br>53<br>89<br>9 | 4.<br>97<br>29<br>3 | 2.2<br>404<br>885<br>18  | 1.1<br>638<br>133<br>33  | 2.2<br>40<br>48<br>85       | U<br>p           | 0.0<br>44<br>08<br>93       | 0.4<br>34<br>02<br>31       |

|                |             |                                           |                     |                     |                     |                     |                     |                     |                          |                          |                             |                  |                             |                             |
|----------------|-------------|-------------------------------------------|---------------------|---------------------|---------------------|---------------------|---------------------|---------------------|--------------------------|--------------------------|-----------------------------|------------------|-----------------------------|-----------------------------|
|                |             |                                           |                     |                     |                     |                     |                     |                     |                          |                          | 18                          |                  | 42                          | 21                          |
| 21<br>60       | F11         | Coagulation factor XI                     | 5.<br>81<br>69<br>3 | 5.<br>37<br>11<br>4 | 6.<br>38<br>65<br>8 | 4.<br>15<br>44<br>6 | 4.<br>05<br>98<br>5 | 2.<br>74<br>34<br>9 | -4.<br>612<br>716<br>629 | -2.<br>205<br>616<br>667 | 4.6<br>12<br>71<br>66<br>29 | D<br>o<br>w<br>n | 0.0<br>01<br>64<br>72<br>4  | 0.1<br>88<br>17<br>54<br>66 |
| 97<br>88       | MTSS<br>1   | Metastasis suppressor 1                   | 7.<br>14<br>67<br>8 | 8.<br>28<br>18<br>9 | 8.<br>59<br>48<br>4 | 7.<br>16<br>19      | 6.<br>45<br>40<br>5 | 6.<br>69<br>87<br>8 | -2.<br>355<br>870<br>112 | -1.<br>236<br>26         | 2.3<br>55<br>87<br>01<br>12 | D<br>o<br>w<br>n | 0.0<br>20<br>47<br>39<br>02 | 0.3<br>71<br>13<br>26<br>99 |
| 94<br>9        | SCAR<br>B1  | Scavenger receptor class B, member 1      | 8.<br>05<br>31<br>2 | 7.<br>35<br>41      | 7.<br>50<br>57<br>5 | 6.<br>29<br>11<br>4 | 6.<br>57<br>03<br>2 | 6.<br>43<br>60<br>3 | -2.<br>305<br>628<br>382 | -1.<br>205<br>16         | 2.3<br>05<br>62<br>83<br>82 | D<br>o<br>w<br>n | 0.0<br>02<br>11<br>04<br>87 | 0.2<br>06<br>94<br>32<br>89 |
| 10<br>29<br>9  | MARC<br>H6  | Membrane associated ring-CH-type finger 6 | 5.<br>13<br>25<br>7 | 5.<br>31<br>30<br>9 | 5.<br>27<br>27<br>7 | 6.<br>25<br>65<br>4 | 6.<br>55<br>42<br>2 | 5.<br>98<br>02<br>4 | 2.0<br>338<br>171<br>79  | 1.0<br>241<br>9          | 2.0<br>33<br>81<br>71<br>79 | U<br>p           | 0.0<br>02<br>56<br>80<br>98 | 0.2<br>21<br>48<br>56<br>65 |
| 84<br>51       | CUL4<br>A   | Cullin 4A                                 | 4.<br>19<br>89<br>2 | 4.<br>60<br>74<br>8 | 4.<br>38<br>57      | 5.<br>24<br>72<br>5 | 6.<br>20<br>89<br>1 | 5.<br>16<br>59<br>5 | 2.2<br>089<br>131<br>05  | 1.1<br>433<br>366<br>67  | 2.2<br>08<br>91<br>31<br>05 | U<br>p           | 0.0<br>08<br>87<br>43<br>51 | 0.3<br>08<br>52<br>19<br>75 |
| 15<br>06<br>96 | PROM<br>2   | Prominin 2                                | 9.<br>21<br>65<br>8 | 8.<br>84<br>41<br>2 | 9.<br>33<br>83<br>9 | 9.<br>16<br>36      | 7.<br>11<br>17<br>2 | 6.<br>94<br>72      | -2.<br>624<br>768<br>163 | -1.<br>392<br>19         | 2.6<br>24<br>76<br>81<br>63 | D<br>o<br>w<br>n | 0.0<br>48<br>86<br>46<br>54 | 0.4<br>46<br>17<br>48       |
| 13<br>26<br>71 | SPATA<br>18 | Spermatogenesis associated 18             | 7.<br>30<br>08      | 8.<br>01<br>21<br>3 | 8.<br>26<br>80<br>3 | 7.<br>48<br>21<br>9 | 5.<br>93<br>22<br>2 | 5.<br>49<br>04<br>4 | -2.<br>945<br>889<br>535 | -1.<br>558<br>703<br>333 | 2.9<br>45<br>88<br>95<br>35 | D<br>o<br>w<br>n | 0.0<br>23<br>93<br>78<br>34 | 0.3<br>81<br>89<br>69<br>49 |
| 19<br>6        | AHR         | Aryl hydrocarbon receptor                 | 4.<br>90<br>87<br>2 | 3.<br>91<br>85<br>1 | 4.<br>81<br>9<br>6  | 6.<br>64<br>94<br>6 | 6.<br>26<br>40<br>7 | 5.<br>46<br>29<br>5 | 2.9<br>829<br>710<br>99  | 1.5<br>767<br>5          | 2.9<br>82<br>97<br>10<br>99 | U<br>p           | 0.0<br>05<br>55<br>79<br>91 | 0.2<br>71<br>43<br>14<br>26 |
| 10<br>48<br>2  | NXF1        | Nuclear RNA export factor 1               | 9.<br>22<br>74      | 9.<br>37<br>22      | 9.<br>09<br>93      | 8.<br>11<br>84      | 8.<br>31<br>60      | 8.<br>09<br>69      | -2.<br>079<br>014        | -1.<br>055<br>9          | 2.0<br>79<br>01             | D<br>o<br>w      | 0.0<br>01<br>26             | 0.1<br>87<br>10             |

|    |          |                                                  |         |        |         |        |        |        |        |        |        |       |        |       |       |
|----|----------|--------------------------------------------------|---------|--------|---------|--------|--------|--------|--------|--------|--------|-------|--------|-------|-------|
|    |          |                                                  | 2       | 9      | 8       | 3      | 3      | 3      | 759    |        | 47     | n     | 78     | 78    |       |
| 14 | CTGF     | Connective tissue growth factor                  | 4.7067  | 5.0712 | 3.6629  | 6.2912 | 8.2912 | 7.437  | 7.203  | 8.1998 | 3.0356 | 8.199 | U      | 0.003 | 0.237 |
| 42 | MKI67    | Marker of proliferation Ki-67                    | 4.4268  | 3.4021 | 3.5957  | 6.1434 | 7.0301 | 4.8574 | 4.6081 | 2.2014 | 4.6020 | U     | 0.005  | 0.276 |       |
| 57 | ADGR G6  | Adhesion protein-coupled receptor G6             | 4.8963  | 4.458  | 4.7000  | 4.8598 | 6.9871 | 6.7701 | 2.7781 | 1.4741 | 2.778  | U     | 0.031  | 0.399 |       |
| 76 | CA3      | Carbonic anhydrase III                           | 3.9607  | 4.3087 | 4.4057  | 2.2614 | 4.677  | 2.159  | -2.131 | -1.091 | 2.131  | D     | 0.043  | 0.432 |       |
| 64 | CREB 3L2 | Camp responsive element binding protein 3-like 2 | 8.1077  | 8.1511 | 8.0356  | 6.7150 | 7.6106 | 6.2704 | -2.350 | -1.232 | 2.350  | D     | 0.010  | 0.318 |       |
| 50 | PAH      | Phenylalanine hydroxylase                        | 10.9149 | 9.2344 | 10.0959 | 3.2501 | 6.0703 | 4.425  | -45.96 | -5.522 | 45.96  | D     | 0.0014 | 0.127 |       |
| 11 | RMI2     | Recq mediated genome instability 2               | 4.4893  | 4.6476 | 4.7754  | 5.9335 | 5.9096 | 5.6611 | 2.2931 | 1.1973 | 2.293  | U     | 0.0048 | 0.124 |       |
| 79 | NDNF     | Neuron-derived neurotrophic factor               | 7.1897  | 7.6520 | 7.4447  | 4.1199 | 7.1174 | 5.0903 | -3.962 | -1.986 | 3.962  | D     | 0.025  | 0.385 |       |
| 22 | KIAA0907 | KIAA0907                                         | 6.01    | 6.674  | 6.640   | 8.831  | 6.89   | 7.72   | 2.3862 | 1.2547 | 2.386  | U     | 0.016  | 0.353 |       |

|                |             |                                                                                    |                     |                     |                     |                     |                     |                     |                          |                          |                             |                  |                             |                             |
|----------------|-------------|------------------------------------------------------------------------------------|---------------------|---------------------|---------------------|---------------------|---------------------|---------------------|--------------------------|--------------------------|-----------------------------|------------------|-----------------------------|-----------------------------|
| 9              |             |                                                                                    | 75<br>1             | 82<br>8             | 27<br>9             | 56<br>3             | 22<br>3             | 50<br>3             | 910<br>24                | 7                        | 29<br>10<br>24              |                  | 29<br>12<br>94              | 90<br>90<br>69              |
| 55<br>15<br>1  | TMEM<br>38B | Transmembrane<br>protein 38B                                                       | 4.<br>64<br>19<br>2 | 3.<br>50<br>26<br>3 | 3.<br>45<br>32<br>5 | 4.<br>80<br>27<br>7 | 5.<br>39<br>60<br>3 | 4.<br>66<br>83<br>7 | 2.1<br>284<br>305<br>26  | 1.0<br>897<br>9          | 2.1<br>28<br>43<br>05<br>26 | U<br>p           | 0.0<br>22<br>86<br>79<br>88 | 0.3<br>80<br>02<br>10<br>22 |
| 58<br>85       | RAD2<br>1   | RAD21 cohesin<br>complex<br>component                                              | 5.<br>24<br>45<br>6 | 4.<br>49<br>86<br>9 | 4.<br>91<br>34<br>2 | 5.<br>93<br>19<br>2 | 6.<br>87<br>38<br>7 | 5.<br>16<br>29<br>5 | 2.1<br>495<br>331<br>11  | 1.1<br>040<br>233<br>33  | 2.1<br>49<br>53<br>31<br>11 | U<br>p           | 0.0<br>42<br>80<br>94<br>11 | 0.4<br>32<br>07<br>88<br>1  |
| 40<br>05       | LMO2        | LIM domain only<br>2                                                               | 6.<br>88<br>76      | 6.<br>00<br>65<br>9 | 7.<br>04<br>71<br>5 | 5.<br>06<br>91<br>8 | 6.<br>10<br>59<br>9 | 5.<br>41<br>36<br>7 | -2.<br>169<br>706<br>65  | -1.<br>117<br>5          | 2.1<br>69<br>70<br>66<br>5  | D<br>o<br>w<br>n | 0.0<br>22<br>82<br>41<br>26 | 0.3<br>79<br>92<br>11<br>68 |
| 81<br>50<br>2  | HM13        | Histocompatibility<br>(minor) 13                                                   | 5.<br>17<br>73<br>5 | 6.<br>49<br>88<br>1 | 5.<br>91<br>37<br>7 | 4.<br>65<br>59<br>2 | 4.<br>84<br>01<br>7 | 4.<br>48<br>38<br>7 | -2.<br>302<br>694<br>999 | -1.<br>203<br>323<br>333 | 2.3<br>02<br>69<br>49<br>99 | D<br>o<br>w<br>n | 0.0<br>10<br>56<br>93<br>73 | 0.3<br>22<br>73<br>69<br>69 |
| 20<br>00<br>30 | NBPF1<br>1  | Neuroblastoma<br>breakpoint family<br>member 11                                    | 6.<br>53<br>96<br>3 | 6.<br>63<br>45<br>9 | 6.<br>41<br>74      | 7.<br>40<br>05<br>6 | 7.<br>69<br>65<br>8 | 7.<br>70<br>66<br>2 | 2.1<br>004<br>716<br>78  | 1.0<br>707<br>133<br>33  | 2.1<br>00<br>47<br>16<br>78 | U<br>p           | 0.0<br>01<br>29<br>23<br>19 | 0.1<br>87<br>10<br>78<br>18 |
| 34<br>00       | ID4         | Inhibitor of DNA<br>binding 4,<br>dominant negative<br>helix-loop-helix<br>protein | 5.<br>42<br>18<br>2 | 7.<br>08<br>99<br>7 | 5.<br>58<br>99<br>8 | 3.<br>14<br>33<br>6 | 4.<br>93<br>60<br>6 | 2.<br>50<br>63<br>8 | -5.<br>677<br>765<br>769 | -2.<br>505<br>323<br>333 | 5.6<br>77<br>76<br>57<br>69 | D<br>o<br>w<br>n | 0.0<br>09<br>33<br>22<br>72 | 0.3<br>11<br>85<br>21<br>38 |
| 41<br>75       | MCM6        | Minichromosome<br>maintenance<br>complex<br>component 6                            | 5.<br>55<br>49<br>9 | 5.<br>09<br>64<br>2 | 5.<br>19<br>41<br>6 | 6.<br>69<br>83<br>9 | 7.<br>51<br>59<br>4 | 5.<br>89<br>86      | 2.6<br>804<br>093<br>29  | 1.4<br>224<br>533<br>33  | 2.6<br>80<br>40<br>93<br>29 | U<br>p           | 0.0<br>10<br>84<br>84<br>52 | 0.3<br>23<br>87<br>84<br>16 |
| 60<br>95       | RORA        | RAR-related<br>orphan receptor A                                                   | 6.<br>87<br>61<br>2 | 6.<br>83<br>11<br>6 | 6.<br>77<br>51<br>9 | 4.<br>78<br>31<br>6 | 6.<br>43<br>08      | 5.<br>74<br>56<br>1 | -2.<br>256<br>833<br>521 | -1.<br>174<br>3          | 2.2<br>56<br>83<br>35<br>21 | D<br>o<br>w<br>n | 0.0<br>23<br>75<br>79<br>8  | 0.3<br>81<br>26<br>89<br>97 |
| 11             | OSBP        | Oxysterol binding                                                                  | 5.                  | 8.                  | 7.                  | 4.                  | 5.                  | 4.                  | -4.                      | -2.                      | 4.3                         | D                | 0.0                         | 0.2                         |

|                           |                     |                                                                           |                     |                     |                     |                     |                      |                     |                          |                          |                             |                  |                             |                             |
|---------------------------|---------------------|---------------------------------------------------------------------------|---------------------|---------------------|---------------------|---------------------|----------------------|---------------------|--------------------------|--------------------------|-----------------------------|------------------|-----------------------------|-----------------------------|
| 48<br>80                  | L6                  | protein like 6                                                            | 84<br>05<br>4       | 04<br>77<br>2       | 37<br>12<br>7       | 98<br>50<br>1       | 05<br>56<br>5        | 89<br>83<br>5       | 307<br>378<br>194        | 106<br>81                | 07<br>37<br>81<br>94        | o<br>w<br>n      | 05<br>43<br>07<br>18        | 69<br>32<br>15<br>26        |
| 37<br>75                  | KCNK<br>1           | Potassium<br>channel, two pore<br>domain subfamily<br>K, member 1         | 4.<br>36<br>70<br>8 | 4.<br>00<br>35<br>4 | 4.<br>61<br>40<br>1 | 5.<br>92<br>03      | 5.<br>46<br>19<br>5  | 5.<br>34<br>51      | 2.3<br>744<br>170<br>12  | 1.2<br>475<br>733<br>33  | 2.3<br>74<br>41<br>70<br>12 | U<br>p           | 0.0<br>01<br>72<br>76<br>23 | 0.1<br>91<br>04<br>98<br>66 |
| 10<br>63<br>1             | POST<br>N           | Periostin,<br>osteoblast specific<br>factor                               | 5.<br>28<br>48      | 4.<br>46<br>67<br>8 | 3.<br>84<br>98<br>8 | 5.<br>45<br>41<br>3 | 11<br>.1<br>80<br>64 | 6.<br>85<br>90<br>1 | 9.8<br>316<br>939<br>03  | 3.2<br>974<br>4          | 9.8<br>31<br>69<br>39<br>03 | U<br>p           | 0.0<br>45<br>98<br>43<br>81 | 0.4<br>39<br>25<br>30<br>47 |
| 53<br>14                  | PKHD<br>1           | Polycystic kidney<br>and hepatic<br>disease 1<br>(autosomal<br>recessive) | 6.<br>73<br>91<br>8 | 6.<br>47<br>69<br>3 | 6.<br>06<br>52<br>4 | 4.<br>67<br>31<br>4 | 4.<br>72<br>62<br>3  | 5.<br>32<br>66<br>2 | -2.<br>864<br>837<br>549 | -1.<br>518<br>453<br>333 | 2.8<br>64<br>83<br>75<br>49 | D<br>o<br>w<br>n | 0.0<br>01<br>05<br>24<br>27 | 0.1<br>86<br>14<br>79<br>2  |
| 36<br>96                  | ITGB8               | Integrin $\beta$ 8                                                        | 5.<br>11<br>79<br>8 | 3.<br>68<br>90<br>3 | 3.<br>59<br>93<br>7 | 6.<br>75<br>50<br>5 | 5.<br>13<br>74<br>9  | 5.<br>15<br>05<br>1 | 2.9<br>191<br>668<br>37  | 1.5<br>455<br>566<br>67  | 2.9<br>19<br>16<br>68<br>37 | U<br>p           | 0.0<br>32<br>04<br>30<br>87 | 0.4<br>03<br>67<br>11<br>92 |
| 57<br>95                  | PTPRJ               | Protein tyrosine<br>phosphatase,<br>receptor type, J                      | 6.<br>26<br>72<br>5 | 5.<br>88<br>77<br>5 | 5.<br>92<br>66<br>8 | 4.<br>37<br>83      | 5.<br>32<br>95<br>4  | 5.<br>22<br>13<br>3 | -2.<br>071<br>730<br>965 | -1.<br>050<br>836<br>667 | 2.0<br>71<br>73<br>09<br>65 | D<br>o<br>w<br>n | 0.0<br>10<br>54<br>72<br>15 | 0.3<br>22<br>43<br>28<br>32 |
| 56<br>60<br>5             | ERO1<br>B           | Endoplasmic<br>reticulum<br>oxidoreductase $\beta$                        | 5.<br>89<br>71<br>8 | 5.<br>80<br>53<br>2 | 5.<br>49<br>89<br>5 | 3.<br>79<br>41<br>8 | 4.<br>47<br>30<br>7  | 4.<br>76<br>37<br>3 | -2.<br>621<br>071<br>422 | -1.<br>390<br>156<br>667 | 2.6<br>21<br>07<br>14<br>22 | D<br>o<br>w<br>n | 0.0<br>02<br>05<br>88<br>38 | 0.2<br>04<br>15<br>41<br>68 |
| 87<br>3                   | CBR1                | Carbonyl<br>reductase 1                                                   | 4.<br>54<br>72<br>9 | 5.<br>29<br>07<br>6 | 6.<br>03<br>45<br>7 | 4.<br>08<br>37      | 4.<br>01<br>94<br>9  | 3.<br>53<br>41<br>5 | -2.<br>660<br>615<br>438 | -1.<br>411<br>76         | 2.6<br>60<br>61<br>54<br>38 | D<br>o<br>w<br>n | 0.0<br>08<br>26<br>84<br>11 | 0.3<br>03<br>32<br>25<br>99 |
| 10<br>03<br>03<br>45<br>3 | TSNA<br>X-DIS<br>C1 | TSNAX-DISC1<br>readthrough<br>(NMD candidate)                             | 6.<br>23<br>02<br>8 | 6.<br>25<br>33<br>7 | 6.<br>36<br>51<br>7 | 4.<br>51<br>18<br>1 | 5.<br>37<br>2<br>7   | 5.<br>70<br>05<br>7 | -2.<br>126<br>007<br>471 | -1.<br>088<br>146<br>667 | 2.1<br>26<br>00<br>74<br>71 | D<br>o<br>w<br>n | 0.0<br>12<br>45<br>04<br>84 | 0.3<br>34<br>46<br>67<br>31 |



|           |            |                                             |         |         |         |         |         |         |              |            |             |       |             |             |
|-----------|------------|---------------------------------------------|---------|---------|---------|---------|---------|---------|--------------|------------|-------------|-------|-------------|-------------|
| 23600     | AMACR      | A-methylacyl-coa racemase                   | 6.6288  | 7.9019  | 8.1596  | 7.0571  | 6.2886  | 5.0031  | -2.726688    | -1.44715   | 2.72668     | Dow n | 0.049423973 | 0.4461748   |
| 10059     | DNM1L      | Dynamin 1-like                              | 6.10446 | 6.05543 | 5.95484 | 7.42232 | 7.16608 | 6.62493 | 2.046032     | 1.03284967 | 2.046085832 | U p   | 0.00534405  | 0.269321526 |
| 8968      | HIST1H3F   | Histone cluster 1, h3f                      | 7.51267 | 6.70604 | 7.00589 | 7.80547 | 8.82491 | 7.94361 | 2.168144     | 1.1164633  | 2.16814     | U p   | 0.016284617 | 0.353909069 |
| 3672      | ITGA1      | Integrin $\alpha$ 1                         | 4.60435 | 5.03875 | 4.4053  | 5.39165 | 6.74465 | 5.15242 | 2.114199     | 1.0801067  | 2.11419     | U p   | 0.043304662 | 0.432330901 |
| 54602     | NDFIP2     | Nedd4 family interacting protein 2          | 4.80342 | 4.90819 | 4.74532 | 5.66132 | 6.92723 | 5.52985 | 2.3302584    | 1.22049    | 2.33025     | U p   | 0.015521094 | 0.350533052 |
| 360       | AQP3       | Aquaporin 3 (Gill blood group)              | 9.04403 | 10.9564 | 10.3903 | 9.00108 | 7.28715 | 8.33491 | -3.791082    | -1.92261   | 3.79108     | Dow n | 0.015523492 | 0.350533052 |
| 7068      | THRB       | Thyroid hormone receptor, $\beta$           | 6.07488 | 6.0933  | 6.0933  | 7.85574 | 7.17674 | 6.94151 | 2.357901306  | 1.2375033  | 2.35790     | U p   | 0.003055096 | 0.234003889 |
| 100288413 | ERVMER34-1 | Endogenous retrovirus group MER34, member 1 | 4.03881 | 7.53479 | 7.19506 | 3.28364 | 3.30005 | 4.452   | -5.788742569 | -2.53325   | 5.78874     | Dow n | 0.024138669 | 0.382496957 |
| 9603      | NFE2L3     | Nuclear factor, erythroid 2 like 3          | 4.94817 | 5.1098  | 5.07456 | 6.84563 | 7.47539 | 6.75083 | 3.944311065  | 1.9797733  | 3.94431     | U p   | 0.001117    | 0.1278498   |

|                           |                      |                                                                        |                     |                      |                      |                     |                      |                     |                          |                              |                             |                  |                             |                             |    |
|---------------------------|----------------------|------------------------------------------------------------------------|---------------------|----------------------|----------------------|---------------------|----------------------|---------------------|--------------------------|------------------------------|-----------------------------|------------------|-----------------------------|-----------------------------|----|
|                           |                      |                                                                        |                     |                      |                      |                     |                      |                     |                          |                              |                             | 65               |                             | 56                          | 29 |
| 72<br>04                  | TRIO                 | Trio Rho guanine nucleotide exchange factor                            | 3.<br>98<br>57<br>4 | 3.<br>80<br>58<br>9  | 3.<br>52<br>12<br>7  | 4.<br>47<br>38<br>9 | 5.<br>56<br>43<br>1  | 5.<br>03<br>00<br>9 | 2.3<br>813<br>780<br>44  | 1.2<br>517<br>966<br>67      | 2.3<br>81<br>37<br>80<br>44 | U<br>p           | 0.0<br>04<br>50<br>75<br>2  | 0.2<br>53<br>49<br>44<br>23 |    |
| 10<br>05<br>07<br>38<br>7 | LOC10<br>050738<br>7 | Uncharacterized LOC100507387                                           | 6.<br>87<br>68<br>9 | 6.<br>80<br>65<br>5  | 6.<br>70<br>38<br>9  | 3.<br>93<br>42<br>4 | 3.<br>95<br>25<br>1  | 5.<br>88<br>33<br>8 | -4.<br>613<br>089<br>661 | -2.<br>205<br>733<br>333     | 4.6<br>13<br>08<br>96<br>61 | D<br>o<br>w<br>n | 0.0<br>04<br>08<br>31<br>77 | 0.2<br>44<br>25<br>17<br>2  |    |
| 10<br>53<br>69<br>24<br>3 | LOC10<br>536924<br>3 | Sulfotransferase 1A3-like                                              | 6.<br>47<br>72<br>2 | 6.<br>93<br>54<br>7  | 6.<br>66<br>10<br>6  | 7.<br>80<br>23<br>3 | 8.<br>02<br>89<br>9  | 7.<br>66<br>66<br>2 | 2.2<br>059<br>447<br>64  | 1.1<br>413<br>966<br>67      | 2.2<br>05<br>94<br>47<br>64 | U<br>p           | 0.0<br>01<br>52<br>38<br>01 | 0.1<br>87<br>10<br>78<br>18 |    |
| 12<br>66<br>61            | CCDC<br>163P         | Coiled-coil domain containing 163, pseudogene                          | 4.<br>46<br>28<br>6 | 5.<br>29<br>60<br>3  | 4.<br>97<br>17<br>1  | 4.<br>00<br>72<br>6 | 3.<br>91<br>35<br>7  | 3.<br>75<br>18<br>3 | -2.<br>026<br>953<br>979 | -1.<br>019<br>313<br>333     | 2.0<br>26<br>95<br>39<br>79 | D<br>o<br>w<br>n | 0.0<br>04<br>58<br>44<br>42 | 0.2<br>54<br>41<br>63<br>12 |    |
| 33<br>97                  | ID1                  | Inhibitor of DNA binding 1, dominant negative helix-loop-helix protein | 9.<br>99<br>66<br>2 | 11<br>.1<br>43<br>64 | 10<br>.8<br>22<br>25 | 8.<br>36<br>13<br>5 | 7.<br>32<br>27<br>2  | 9.<br>49<br>75<br>6 | -4.<br>790<br>888<br>818 | -2.<br>260<br>293<br>333     | 4.7<br>90<br>88<br>88<br>18 | D<br>o<br>w<br>n | 0.0<br>05<br>72<br>02<br>08 | 0.2<br>74<br>20<br>55<br>09 |    |
| 79<br>64<br>6             | PANK<br>3            | Pantothenate kinase 3                                                  | 5.<br>88<br>68<br>6 | 5.<br>50<br>90<br>5  | 5.<br>70<br>96<br>7  | 7.<br>40<br>72      | 6.<br>36<br>63       | 6.<br>59<br>72      | 2.1<br>263<br>415<br>21  | 1.0<br>883<br>733<br>33      | 2.1<br>26<br>34<br>15<br>21 | U<br>p           | 0.0<br>10<br>43<br>36<br>06 | 0.3<br>20<br>71<br>63<br>98 |    |
| 34<br>05<br>42            | BEX5                 | Brain expressed X-linked 5                                             | 5.<br>29<br>11<br>4 | 5.<br>26<br>87<br>9  | 5.<br>66<br>04<br>1  | 4.<br>73<br>90<br>8 | 3.<br>79<br>36<br>5  | 3.<br>90<br>47<br>3 | -2.<br>396<br>551<br>595 | -1.<br>260<br>96<br>15<br>95 | 2.3<br>96<br>55<br>15<br>95 | D<br>o<br>w<br>n | 0.0<br>03<br>81<br>15<br>57 | 0.2<br>38<br>90<br>72<br>74 |    |
| 23<br>02<br>2             | PALL<br>D            | Palladin, cytoskeletal associated protein                              | 7.<br>53<br>70<br>3 | 7.<br>34<br>20<br>2  | 6.<br>72<br>83<br>6  | 8.<br>17<br>36<br>1 | 10<br>.5<br>89<br>19 | 8.<br>44<br>52<br>3 | 3.6<br>474<br>124<br>1   | 1.8<br>668<br>733<br>33      | 3.6<br>47<br>41<br>24<br>1  | U<br>p           | 0.0<br>22<br>23<br>94       | 0.3<br>78<br>42<br>81<br>9  |    |
| 10<br>82<br>6             | FAXD<br>C2           | Fatty acid hydroxylase domain containing                               | 7.<br>36<br>44      | 7.<br>90<br>15       | 8.<br>01<br>61       | 5.<br>72<br>55      | 6.<br>80<br>43       | 7.<br>42<br>01      | -2.<br>159<br>469        | -1.<br>110<br>676            | 2.1<br>59<br>46             | D<br>o<br>w      | 0.0<br>42<br>01             | 0.4<br>30<br>07             |    |

|    |       |                      |    |    |    |    |    |    |     |     |     |   |     |     |
|----|-------|----------------------|----|----|----|----|----|----|-----|-----|-----|---|-----|-----|
|    |       | 2                    | 2  | 2  | 5  | 4  | 4  | 8  | 09  | 667 | 90  | n | 78  | 43  |
| 72 | TSPYL | TSPY-like 1          | 9. | 9. | 9. | 8. | 8. | 9. | -2. | -1. | 2.2 | D | 0.0 | 0.2 |
| 59 | 1     |                      | 77 | 99 | 83 | 36 | 53 | 11 | 297 | 199 | 97  | o | 02  | 15  |
|    |       |                      | 98 | 34 | 18 | 06 | 12 | 36 | 157 | 85  | 15  | w | 42  | 53  |
|    |       |                      | 1  | 7  | 9  | 8  | 9  | 5  | 857 |     | 78  | n | 02  | 16  |
|    |       |                      |    |    |    |    |    |    |     |     | 57  |   | 69  | 8   |
| 21 | FBLN1 | Fibulin 1            | 5. | 5. | 4. | 5. | 9. | 7. | 4.8 | 2.2 | 4.8 | U | 0.0 | 0.4 |
| 92 |       |                      | 37 | 68 | 54 | 58 | 26 | 62 | 830 | 877 | 83  | p | 33  | 08  |
|    |       |                      | 95 | 26 | 36 | 67 | 06 | 18 | 977 | 966 | 09  |   | 82  | 23  |
|    |       |                      | 1  | 8  | 2  | 7  |    | 3  | 79  | 67  | 77  |   | 85  | 98  |
|    |       |                      |    |    |    |    |    |    |     |     | 79  |   | 26  | 28  |
| 10 | ZNF51 | ZNF511-PRAP1         | 7. | 6. | 6. | 8. | 9. | 6. | 3.3 | 1.7 | 3.3 | U | 0.0 | 0.4 |
| 43 | 1-PRA | readthrough          | 06 | 77 | 21 | 90 | 57 | 77 | 315 | 362 | 31  | p | 41  | 26  |
| 26 | P1    |                      | 45 | 75 | 07 | 88 | 53 | 72 | 726 | 033 | 57  |   | 23  | 96  |
| 05 |       |                      | 2  | 7  | 6  | 1  | 8  | 7  | 02  | 33  | 26  |   | 31  | 10  |
| 6  |       |                      |    |    |    |    |    |    |     |     | 02  |   | 47  | 48  |
| 33 | APLP1 | Amyloid $\beta$ (A4) | 6. | 6. | 5. | 3. | 3. | 5. | -4. | -2. | 4.5 | D | 0.0 | 0.2 |
| 3  |       | precursor-like       | 67 | 62 | 55 | 94 | 28 | 02 | 579 | 195 | 79  | o | 03  | 37  |
|    |       | protein 1            | 21 | 68 | 26 | 93 | 87 | 80 | 330 | 136 | 33  | w | 44  | 14  |
|    |       |                      | 2  | 8  | 3  | 7  | 8  | 7  | 422 | 667 | 04  | n | 27  | 66  |
|    |       |                      |    |    |    |    |    |    |     |     | 22  |   | 53  | 6   |
| 54 | XRN1  | 5'-3'                | 4. | 3. | 4. | 4. | 5. | 5. | 2.1 | 1.1 | 2.1 | U | 0.0 | 0.2 |
| 46 |       | exoribonuclease 1    | 61 | 88 | 12 | 98 | 80 | 17 | 622 | 125 | 62  | p | 07  | 92  |
| 4  |       |                      | 68 | 98 | 12 | 51 | 04 | 98 | 300 | 2   | 23  |   | 31  | 18  |
|    |       |                      | 5  | 3  | 6  | 9  | 5  | 6  | 1   |     | 00  |   | 56  | 66  |
|    |       |                      |    |    |    |    |    |    |     |     | 1   |   | 02  | 83  |
| 80 | EFHD  | EF-hand domain       | 4. | 5. | 4. | 2. | 4. | 3. | -2. | -1. | 2.4 | D | 0.0 | 0.3 |
| 30 | 1     | family member D1     | 26 | 00 | 53 | 79 | 15 | 02 | 424 | 277 | 24  | o | 13  | 42  |
| 3  |       |                      | 72 | 52 | 63 | 60 | 88 | 14 | 174 | 493 | 17  | w | 49  | 22  |
|    |       |                      | 6  | 7  | 1  | 5  | 7  | 4  | 132 | 333 | 41  | n | 82  | 02  |
|    |       |                      |    |    |    |    |    |    |     |     | 32  |   | 08  | 92  |
| 11 | KLK11 | Kallikrein related   | 9. | 8. | 8. | 8. | 5. | 4. | -7. | -2. | 7.2 | D | 0.0 | 0.3 |
| 01 |       | peptidase 11         | 46 | 57 | 78 | 52 | 02 | 67 | 297 | 867 | 97  | o | 21  | 77  |
| 2  |       |                      | 67 | 41 | 60 | 41 | 23 | 82 | 370 | 376 | 37  | w | 78  | 15  |
|    |       |                      | 1  | 8  | 3  | 9  | 6  | 4  | 313 | 667 | 03  | n | 19  | 66  |
|    |       |                      |    |    |    |    |    |    |     |     | 13  |   | 14  | 14  |
| 25 | RAB3  | RAB3 gtpase          | 4. | 4. | 4. | 5. | 5. | 5. | 2.1 | 1.1 | 2.1 | U | 0.0 | 0.2 |
| 78 | GAP2  | activating           | 22 | 39 | 30 | 26 | 97 | 00 | 500 | 043 | 50  | p | 05  | 69  |
| 2  |       | non-catalytic        | 84 | 75 | 84 | 47 | 38 | 88 | 149 | 466 | 01  |   | 39  | 32  |
|    |       | protein subunit 2    | 3  | 6  | 3  | 5  | 3  | 8  | 13  | 67  | 49  |   | 52  | 15  |
|    |       |                      |    |    |    |    |    |    |     |     | 13  |   | 36  | 26  |
| 91 | EXO1  | Exonuclease 1        | 4. | 4. | 4. | 6. | 5. | 5. | 2.1 | 1.0 | 2.1 | U | 0.0 | 0.1 |
| 56 |       |                      | 49 | 60 | 83 | 04 | 68 | 49 | 333 | 931 | 33  | p | 01  | 92  |

|                           |                      |                                                                                          |                     |                     |                     |                     |                     |                     |                          |                          |                             |                  |                             |                             |
|---------------------------|----------------------|------------------------------------------------------------------------------------------|---------------------|---------------------|---------------------|---------------------|---------------------|---------------------|--------------------------|--------------------------|-----------------------------|------------------|-----------------------------|-----------------------------|
|                           |                      |                                                                                          | 85<br>6             | 76<br>6             | 45<br>7             | 05<br>7             | 41<br>2             | 54<br>3             | 342<br>14                | 1                        | 33<br>42<br>14              |                  | 80<br>64<br>69              | 63<br>39<br>39              |
| 55<br>92                  | PRKG<br>1            | Protein kinase,<br>cgmp-dependent,<br>type I                                             | 6.<br>10<br>99<br>1 | 5.<br>77<br>59<br>6 | 6.<br>14<br>33<br>6 | 8.<br>01<br>99<br>5 | 8.<br>63<br>97<br>5 | 8.<br>35<br>30<br>9 | 5.0<br>205<br>775<br>39  | 2.3<br>278<br>533<br>33  | 5.0<br>20<br>57<br>75<br>39 | U<br>p           | 3.3<br>25<br>83<br>E-<br>05 | 0.0<br>96<br>05<br>29<br>42 |
| 64<br>07<br>8             | SLC28<br>A3          | Solute carrier<br>family 28<br>(concentrative<br>nucleoside<br>transporter),<br>member 3 | 4.<br>70<br>48<br>5 | 8.<br>03<br>55<br>9 | 9.<br>54<br>16<br>7 | 4.<br>03<br>45<br>7 | 5.<br>29<br>51<br>9 | 4.<br>40<br>71      | -7.<br>202<br>095<br>185 | -2.<br>848<br>416<br>667 | 7.2<br>02<br>09<br>51<br>85 | D<br>o<br>w<br>n | 0.0<br>40<br>96<br>70<br>51 | 0.4<br>26<br>76<br>78<br>27 |
| 47<br>74                  | NFIA                 | Nuclear factor I/A                                                                       | 9.<br>06<br>01<br>8 | 9.<br>28<br>94<br>2 | 9.<br>50<br>79<br>6 | 8.<br>11<br>85      | 8.<br>30<br>84<br>8 | 7.<br>92<br>09<br>7 | -2.<br>249<br>914<br>222 | -1.<br>169<br>87         | 2.2<br>49<br>91<br>42<br>22 | D<br>o<br>w<br>n | 0.0<br>01<br>35<br>22<br>3  | 0.1<br>87<br>10<br>78<br>18 |
| 30<br>81                  | HGD                  | Homogentisate<br>1,2-dioxygenase                                                         | 8.<br>62<br>34<br>8 | 7.<br>05<br>74<br>2 | 7.<br>68<br>33<br>7 | 6.<br>03<br>22      | 5.<br>61<br>97<br>9 | 6.<br>05<br>94<br>3 | -3.<br>691<br>694<br>918 | -1.<br>884<br>283<br>333 | 3.6<br>91<br>69<br>49<br>18 | D<br>o<br>w<br>n | 0.0<br>02<br>45<br>00<br>76 | 0.2<br>17<br>25<br>53<br>34 |
| 54<br>44<br>3             | ANLN                 | Anillin actin<br>binding protein                                                         | 4.<br>59<br>2       | 3.<br>92<br>53<br>5 | 4.<br>44<br>04<br>2 | 5.<br>56<br>73<br>3 | 7.<br>23<br>30<br>4 | 5.<br>54<br>89      | 3.4<br>753<br>702<br>08  | 1.7<br>971<br>666<br>67  | 3.4<br>75<br>37<br>02<br>08 | U<br>p           | 0.0<br>07<br>55<br>41<br>03 | 0.2<br>95<br>71<br>33<br>58 |
| 10<br>02<br>88<br>15<br>2 | LOC10<br>028815<br>2 | Uncharacterized<br>LOC100288152                                                          | 6.<br>77<br>83      | 8.<br>04<br>18<br>2 | 6.<br>50<br>75      | 6.<br>37<br>45<br>7 | 5.<br>33<br>81<br>1 | 5.<br>21<br>66<br>3 | -2.<br>762<br>746<br>772 | -1.<br>466<br>103<br>333 | 2.7<br>62<br>74<br>67<br>72 | D<br>o<br>w<br>n | 0.0<br>20<br>49<br>49<br>79 | 0.3<br>71<br>13<br>26<br>99 |
| 54<br>27                  | POLE2                | Polymerase (DNA<br>directed), epsilon<br>2, accessory<br>subunit                         | 4.<br>32<br>81      | 4.<br>46<br>32<br>9 | 4.<br>74<br>79<br>2 | 5.<br>44<br>66<br>5 | 6.<br>90<br>41<br>2 | 5.<br>17<br>78<br>3 | 2.5<br>136<br>143<br>7   | 1.3<br>297<br>633<br>33  | 2.5<br>13<br>61<br>43<br>7  | U<br>p           | 0.0<br>21<br>85<br>51<br>62 | 0.3<br>77<br>60<br>64<br>46 |
| 14<br>79<br>68            | CAPN<br>12           | Calpain 12                                                                               | 6.<br>98<br>67<br>1 | 8.<br>82<br>28<br>8 | 9.<br>64<br>78<br>9 | 4.<br>98<br>19<br>1 | 5.<br>36<br>92<br>4 | 6.<br>65<br>23      | -7.<br>051<br>890<br>143 | -2.<br>818<br>01         | 7.0<br>51<br>89<br>01<br>43 | D<br>o<br>w<br>n | 0.0<br>06<br>48<br>92<br>99 | 0.2<br>85<br>18<br>60<br>95 |

|                           |                      |                                                                                |                     |                      |                      |                      |                      |                     |                          |                         |                             |                  |                             |                             |
|---------------------------|----------------------|--------------------------------------------------------------------------------|---------------------|----------------------|----------------------|----------------------|----------------------|---------------------|--------------------------|-------------------------|-----------------------------|------------------|-----------------------------|-----------------------------|
| 61<br>96                  | RPS6K<br>A2          | Ribosomal protein<br>S6 kinase, 90kda,<br>polypeptide 2                        | 7.<br>51<br>57<br>6 | 7.<br>04<br>29       | 7.<br>25<br>29<br>5  | 5.<br>51<br>72<br>4  | 6.<br>53<br>13<br>8  | 6.<br>42<br>95<br>7 | -2.<br>160<br>162<br>733 | -1.<br>111<br>14        | 2.1<br>60<br>16<br>27<br>33 | D<br>o<br>w<br>n | 0.0<br>11<br>13<br>37<br>84 | 0.3<br>24<br>61<br>19<br>79 |
| 89<br>83<br>9             | ARHG<br>AP11B<br>11B | Rho gtpase<br>activating protein<br>11B                                        | 5.<br>86<br>99<br>6 | 5.<br>53<br>95<br>7  | 6.<br>22<br>91<br>2  | 7.<br>63<br>44<br>8  | 7.<br>95<br>97<br>7  | 7.<br>54<br>28<br>6 | 3.5<br>623<br>271<br>16  | 1.8<br>328<br>2         | 3.5<br>62<br>32<br>71<br>16 | U<br>p           | 0.0<br>00<br>19<br>91<br>65 | 0.1<br>35<br>27<br>95<br>77 |
| 28<br>23<br>1             | SLCO4<br>A1          | Solute carrier<br>organic anion<br>transporter family<br>member 4A1            | 4.<br>54<br>65<br>5 | 4.<br>73<br>43<br>8  | 5.<br>29<br>57<br>3  | 5.<br>63<br>18<br>8  | 7.<br>32<br>69<br>8  | 6.<br>56<br>3<br>8  | 3.1<br>348<br>577<br>94  | 1.6<br>484              | 3.1<br>34<br>85<br>77<br>94 | U<br>p           | 0.0<br>07<br>91<br>04<br>22 | 0.2<br>99<br>13<br>95<br>54 |
| 97<br>61                  | MLEC                 | Malectin                                                                       | 9.<br>69<br>49<br>9 | 10<br>.2<br>15<br>76 | 10<br>.1<br>50<br>19 | 8.<br>25<br>65       | 9.<br>83<br>63<br>5  | 8.<br>63<br>26<br>6 | -2.<br>161<br>166<br>164 | -1.<br>111<br>81        | 2.1<br>61<br>16<br>61<br>64 | D<br>o<br>w<br>n | 0.0<br>34<br>96<br>73<br>74 | 0.4<br>08<br>43<br>73<br>33 |
| 10<br>53<br>76<br>57<br>5 | LOC10<br>537657<br>5 | Uncharacterized<br>LOC105376575                                                | 4.<br>56<br>50<br>4 | 7.<br>37<br>47<br>1  | 6.<br>14<br>17<br>8  | 3.<br>40<br>91       | 4.<br>32<br>73<br>3  | 3.<br>62<br>24      | -4.<br>726<br>918<br>531 | -2.<br>240              | 4.7<br>26<br>91<br>85<br>31 | D<br>o<br>w<br>n | 0.0<br>12<br>82<br>10<br>7  | 0.3<br>36<br>17<br>41<br>55 |
| 86<br>04                  | SLC25<br>A12         | Solute carrier<br>family 25<br>(aspartate/glutamat<br>e carrier), member<br>12 | 4.<br>74<br>15<br>7 | 6.<br>09<br>01<br>2  | 4.<br>70<br>62       | 6.<br>49<br>50<br>2  | 6.<br>27<br>76<br>8  | 5.<br>95<br>07      | 2.0<br>875<br>874<br>97  | 1.0<br>618<br>366<br>67 | 2.0<br>87<br>58<br>74<br>97 | U<br>p           | 0.0<br>35<br>48<br>29<br>31 | 0.4<br>111<br>15<br>84<br>6 |
| 41<br>92                  | MDK                  | Midkine (neurite<br>growth-promoting<br>factor 2)                              | 9.<br>24<br>63<br>4 | 8.<br>62<br>24<br>4  | 8.<br>74<br>86<br>1  | 10<br>.3<br>94<br>14 | 10<br>.2<br>43<br>88 | 9.<br>98<br>27<br>2 | 2.5<br>217<br>932<br>49  | 1.3<br>344<br>5         | 2.5<br>21<br>79<br>32<br>49 | U<br>p           | 0.0<br>01<br>16<br>59<br>45 | 0.1<br>86<br>14<br>79<br>2  |
| 18<br>94                  | ECT2                 | Epithelial cell<br>transforming 2                                              | 4.<br>96<br>55<br>1 | 6.<br>19<br>47<br>3  | 5.<br>67<br>32<br>8  | 6.<br>53<br>32<br>6  | 6.<br>61<br>17<br>7  | 7.<br>92<br>65<br>2 | 2.6<br>623<br>064<br>9   | 1.4<br>126<br>766<br>67 | 2.6<br>62<br>30<br>64<br>9  | U<br>p           | 0.0<br>20<br>74<br>36<br>95 | 0.3<br>71<br>73<br>76<br>6  |
| 92<br>32                  | PTTG1                | Pituitary<br>tumor-transformin<br>g 1                                          | 4.<br>44<br>43<br>1 | 4.<br>07<br>68<br>1  | 4.<br>48<br>38<br>5  | 6.<br>19<br>54<br>4  | 6.<br>81<br>31       | 5.<br>63<br>29<br>9 | 3.6<br>778<br>262<br>72  | 1.8<br>788<br>533<br>33 | 3.6<br>77<br>82<br>62       | U<br>p           | 0.0<br>00<br>72<br>00       | 0.1<br>72<br>63<br>18       |

|                           |                      |                                                         |                     |                     |                     |                     |                     |                     |                          |                          |                             |                  |                             |                             |    |
|---------------------------|----------------------|---------------------------------------------------------|---------------------|---------------------|---------------------|---------------------|---------------------|---------------------|--------------------------|--------------------------|-----------------------------|------------------|-----------------------------|-----------------------------|----|
|                           |                      |                                                         |                     |                     |                     |                     |                     |                     |                          |                          |                             | 72               |                             | 42                          | 47 |
| 10<br>27<br>24<br>19<br>7 | LOC10<br>272419<br>7 | Inactive<br>$\gamma$ -glutamyltranspe<br>ptidase 2-like | 9.<br>16<br>15<br>7 | 9.<br>31<br>31<br>4 | 8.<br>59<br>69<br>8 | 7.<br>48<br>88<br>1 | 7.<br>56<br>93<br>1 | 5.<br>95<br>58<br>1 | -4.<br>053<br>739<br>364 | -2.<br>019<br>253<br>333 | 4.0<br>53<br>73<br>93<br>64 | D<br>o<br>w<br>n | 0.0<br>03<br>67<br>15<br>27 | 0.2<br>38<br>59<br>85<br>3  |    |
| 64<br>71<br>4             | PDIA2                | Protein disulfide<br>isomerase family<br>A member 2     | 5.<br>01<br>63<br>2 | 8.<br>88<br>41<br>3 | 9.<br>40<br>83<br>9 | 4.<br>68<br>50<br>7 | 4.<br>62<br>07<br>8 | 5.<br>27<br>75<br>1 | -7.<br>508<br>336<br>628 | -2.<br>908<br>493<br>333 | 7.5<br>08<br>33<br>66<br>28 | D<br>o<br>w<br>n | 0.0<br>31<br>20<br>37<br>36 | 0.4<br>00<br>46<br>67<br>53 |    |
| 23<br>10<br>5             | FSTL4                | Follistatin-like 4                                      | 4.<br>74<br>05<br>7 | 5.<br>63<br>35<br>6 | 5.<br>65<br>52<br>4 | 4.<br>35<br>52      | 3.<br>70<br>77      | 4.<br>01<br>49<br>9 | -2.<br>491<br>751<br>16  | -1.<br>317<br>16         | 2.4<br>91<br>75<br>11<br>6  | D<br>o<br>w<br>n | 0.0<br>04<br>16<br>66<br>45 | 0.2<br>45<br>18<br>04<br>58 |    |
| 10<br>20<br>4             | NUTF<br>2            | Nuclear transport<br>factor 2                           | 4.<br>44<br>74<br>5 | 4.<br>47<br>23<br>9 | 4.<br>31<br>48<br>9 | 6.<br>07<br>84<br>5 | 4.<br>85<br>68<br>5 | 5.<br>43<br>88<br>6 | 2.0<br>654<br>793<br>93  | 1.0<br>464<br>766<br>67  | 2.0<br>65<br>47<br>93<br>93 | U<br>p           | 0.0<br>13<br>43<br>89<br>95 | 0.3<br>41<br>83<br>96<br>28 |    |
| 36<br>8                   | ABCC<br>6            | ATP binding<br>cassette subfamily<br>C member 6         | 5.<br>34<br>15      | 6.<br>23<br>23      | 6.<br>47<br>21<br>2 | 5.<br>36<br>39<br>3 | 4.<br>50<br>68<br>1 | 4.<br>96<br>88<br>4 | -2.<br>097<br>658<br>754 | -1.<br>068<br>78         | 2.0<br>97<br>65<br>87<br>54 | D<br>o<br>w<br>n | 0.0<br>22<br>82<br>16<br>48 | 0.3<br>79<br>92<br>11<br>68 |    |
| 23<br>65<br>0             | TRIM2<br>9           | Tripartite motif<br>containing 29                       | 7.<br>01<br>34<br>3 | 7.<br>46<br>87<br>7 | 7.<br>42<br>48<br>5 | 9.<br>62<br>08<br>9 | 8.<br>08<br>10<br>8 | 8.<br>70<br>86<br>4 | 2.8<br>307<br>545<br>61  | 1.5<br>011<br>866<br>67  | 2.8<br>30<br>75<br>45<br>61 | U<br>p           | 0.0<br>07<br>50<br>24<br>02 | 0.2<br>94<br>41<br>93<br>61 |    |
| 20<br>08<br>79            | LIPH                 | Lipase, member H                                        | 7.<br>21<br>84<br>6 | 7.<br>04<br>70<br>4 | 7.<br>68<br>83<br>9 | 8.<br>50<br>53<br>5 | 8.<br>17<br>01<br>1 | 8.<br>47<br>37<br>9 | 2.0<br>923<br>439<br>09  | 1.0<br>651<br>2          | 2.0<br>92<br>34<br>39<br>09 | U<br>p           | 0.0<br>03<br>81<br>20<br>53 | 0.2<br>38<br>90<br>72<br>74 |    |
| 20<br>52                  | EPHX<br>1            | Epoxide hydrolase<br>1, microsomal<br>(xenobiotic)      | 9.<br>63<br>02<br>7 | 9.<br>15<br>54<br>2 | 9.<br>24<br>10<br>4 | 8.<br>38<br>76<br>6 | 7.<br>77<br>33<br>3 | 7.<br>11<br>85<br>6 | -2.<br>994<br>662<br>321 | -1.<br>582<br>393<br>333 | 2.9<br>94<br>66<br>23<br>21 | D<br>o<br>w<br>n | 0.0<br>02<br>91<br>46<br>7  | 0.2<br>31<br>33<br>53<br>69 |    |
| 72<br>82<br>62            | FAM1<br>57A          | Family with<br>sequence<br>similarity 157               | 8.<br>27<br>78      | 8.<br>11<br>34      | 7.<br>66<br>23      | 5.<br>84<br>47      | 5.<br>87<br>11      | 6.<br>62<br>62      | -3.<br>742<br>070        | -1.<br>903<br>836        | 3.7<br>42<br>07             | D<br>o<br>w      | 0.0<br>00<br>42             | 0.1<br>63<br>37             |    |

|    |       |                       |    |    |    |    |    |    |     |     |     |   |     |     |
|----|-------|-----------------------|----|----|----|----|----|----|-----|-----|-----|---|-----|-----|
|    |       | member A              | 2  | 5  | 9  | 6  | 1  | 8  | 312 | 667 | 03  | n | 62  | 87  |
|    |       |                       |    |    |    |    |    |    |     |     | 12  |   | 53  | 34  |
| 27 | APOB  | Apolipoprotein B      | 8. | 8. | 8. | 6. | 6. | 7. | -2. | -1. | 2.2 | D | 0.0 | 0.3 |
| 35 | EC3C  | mRNA editing          | 03 | 24 | 36 | 48 | 96 | 65 | 267 | 180 | 67  | o | 08  | 06  |
| 0  |       | enzyme, catalytic     | 81 | 08 | 50 | 98 | 04 | 11 | 103 | 85  | 10  | w | 46  | 05  |
|    |       | polypeptide-like      | 7  | 1  | 3  | 3  | 4  | 9  | 098 |     | 30  | n | 31  | 14  |
|    |       | 3C                    |    |    |    |    |    |    |     |     | 98  |   | 5   | 94  |
| 29 | GUCY  | Guanylate cyclase     | 4. | 2. | 3. | 6. | 6. | 4. | 4.8 | 2.2 | 4.8 | U | 0.0 | 0.3 |
| 83 | 1B3   | 1, soluble, $\beta$ 3 | 42 | 62 | 13 | 75 | 02 | 24 | 576 | 802 | 57  | p | 15  | 50  |
|    |       |                       | 59 | 36 | 32 | 52 | 25 | 57 | 100 | 466 | 61  |   | 51  | 53  |
|    |       |                       | 2  | 4  | 9  | 9  | 6  | 4  | 03  | 67  | 00  |   | 83  | 30  |
|    |       |                       |    |    |    |    |    |    |     |     | 03  |   | 02  | 52  |
| 37 | KCNJ1 | Potassium             | 7. | 7. | 7. | 7. | 6. | 5. | -2. | -1. | 2.4 | D | 0.0 | 0.3 |
| 72 | 5     | channel, inwardly     | 75 | 13 | 98 | 18 | 40 | 42 | 443 | 289 | 43  | o | 28  | 93  |
|    |       | rectifying            | 69 | 55 | 70 | 20 | 35 | 67 | 761 | 103 | 76  | w | 94  | 97  |
|    |       | subfamily J,          | 9  | 6  | 7  | 4  | 2  | 5  | 232 | 333 | 12  | n | 89  | 60  |
|    |       | member 15             |    |    |    |    |    |    |     |     | 32  |   | 69  | 15  |
| 73 | UBC   | Ubiquitin C           | 10 | 9. | 9. | 8. | 9. | 9. | -2. | -1. | 2.0 | D | 0.0 | 0.4 |
| 16 |       |                       | .7 | 71 | 72 | 42 | 50 | 24 | 017 | 012 | 17  | o | 43  | 32  |
|    |       |                       | 85 | 06 | 28 | 85 | 86 | 32 | 706 | 716 | 70  | w | 27  | 33  |
|    |       |                       | 08 | 8  | 9  | 9  | 2  | 9  | 968 | 667 | 69  | n | 96  | 09  |
|    |       |                       |    |    |    |    |    |    |     |     | 68  |   | 76  | 01  |
| 12 | ZG16B | Zymogen granule       | 7. | 8. | 9. | 7. | 6. | 5. | -4. | -2. | 4.0 | D | 0.0 | 0.3 |
| 42 |       | protein 16B           | 91 | 62 | 76 | 83 | 48 | 90 | 074 | 026 | 74  | o | 14  | 46  |
| 20 |       |                       | 31 | 93 | 05 | 94 | 22 | 12 | 773 | 72  | 77  | w | 48  | 82  |
|    |       |                       | 9  | 3  | 3  | 3  | 3  | 3  | 873 |     | 38  | n | 91  | 70  |
|    |       |                       |    |    |    |    |    |    |     |     | 73  |   | 91  | 31  |
| 97 | PHAC  | Phosphatase and       | 7. | 8. | 8. | 6. | 7. | 7. | -2. | -1. | 2.0 | D | 0.0 | 0.3 |
| 49 | TR2   | actin regulator 2     | 73 | 52 | 08 | 50 | 57 | 14 | 058 | 041 | 58  | o | 19  | 68  |
|    |       |                       | 73 | 01 | 89 | 61 | 51 | 02 | 509 | 6   | 50  | w | 87  | 20  |
|    |       |                       | 2  | 3  | 1  | 4  | 4  | 8  | 348 |     | 93  | n | 61  | 43  |
|    |       |                       |    |    |    |    |    |    |     |     | 48  |   | 9   | 05  |
| 79 | ROGD  | Rogdi homolog         | 7. | 7. | 8. | 6. | 6. | 6. | -2. | -1. | 2.1 | D | 0.0 | 0.3 |
| 64 | I     |                       | 45 | 58 | 22 | 93 | 09 | 97 | 121 | 084 | 21  | o | 14  | 48  |
| 1  |       |                       | 73 | 65 | 38 | 46 | 99 | 83 | 297 | 946 | 29  | w | 96  | 11  |
|    |       |                       | 9  | 1  | 8  | 5  | 2  | 7  | 061 | 667 | 70  | n | 54  | 05  |
|    |       |                       |    |    |    |    |    |    |     |     | 61  |   | 28  | 43  |
| 39 | LBR   | Lamin B receptor      | 7. | 6. | 6. | 8. | 9. | 7. | 2.7 | 1.4 | 2.7 | U | 0.0 | 0.3 |
| 30 |       |                       | 59 | 59 | 92 | 62 | 13 | 74 | 620 | 657 | 62  | p | 10  | 23  |
|    |       |                       | 35 | 17 | 59 | 66 | 90 | 27 | 510 | 4   | 05  |   | 87  | 87  |
|    |       |                       | 4  | 3  | 2  | 7  | 2  | 2  | 79  |     | 10  |   | 13  | 84  |
|    |       |                       |    |    |    |    |    |    |     |     | 79  |   | 6   | 16  |
| 33 | APLP2 | Amyloid $\beta$ (A4)  | 11 | 10 | 10 | 9. | 9. | 9. | -2. | -1. | 2.0 | D | 0.0 | 0.3 |
| 4  |       | precursor-like        | .0 | .0 | .3 | 64 | 57 | 19 | 005 | 003 | 05  | o | 13  | 45  |

|                |                     |                                               |                     |                     |                     |                      |                     |                     |                          |                          |                             |                  |                             |                             |
|----------------|---------------------|-----------------------------------------------|---------------------|---------------------|---------------------|----------------------|---------------------|---------------------|--------------------------|--------------------------|-----------------------------|------------------|-----------------------------|-----------------------------|
|                |                     | protein 2                                     | 36<br>38            | 45<br>12            | 52<br>44            | 90<br>1              | 35<br>8             | 96<br>9             | 395<br>328               | 886<br>667               | 39<br>53<br>28              | w<br>n           | 99<br>79<br>23              | 25<br>55<br>8               |
| 53<br>61<br>6  | ADAM<br>22          | ADAM<br>metallopeptidase<br>domain 22         | 3.<br>99<br>26<br>5 | 4.<br>53<br>65<br>9 | 4.<br>47<br>29<br>1 | 6.<br>30<br>10<br>8  | 7.<br>71<br>78<br>8 | 6.<br>42<br>37<br>5 | 5.5<br>796<br>965<br>62  | 2.4<br>801<br>866<br>67  | 5.5<br>79<br>69<br>65<br>62 | U<br>p           | 0.0<br>00<br>52<br>55<br>35 | 0.1<br>64<br>53<br>10<br>93 |
| 27<br>06       | GJB2                | Gap junction<br>protein $\beta$ 2             | 3.<br>54<br>67<br>4 | 3.<br>49<br>46<br>1 | 3.<br>99<br>47<br>1 | 4.<br>77<br>26<br>3  | 5.<br>63<br>57<br>9 | 4.<br>64<br>51<br>8 | 2.5<br>300<br>747<br>34  | 1.3<br>391<br>8          | 2.5<br>30<br>07<br>47<br>34 | U<br>p           | 0.0<br>03<br>38<br>63<br>37 | 0.2<br>37<br>14<br>66<br>6  |
| 23<br>54<br>4  | SEZ6L               | Seizure related 6<br>homolog<br>(mouse)-like  | 5.<br>85<br>55<br>8 | 8.<br>24<br>40<br>7 | 8.<br>18<br>99<br>9 | 6.<br>07<br>59<br>7  | 5.<br>55<br>96      | 5.<br>92<br>79<br>6 | -2.<br>980<br>119<br>123 | -1.<br>575<br>37         | 2.9<br>80<br>11<br>91<br>23 | D<br>o<br>w<br>n | 0.0<br>42<br>88<br>37<br>72 | 0.4<br>32<br>07<br>88<br>1  |
| 85<br>23<br>6  | HIST1<br>H2BK       | Histone cluster 1,<br>h2bk                    | 7.<br>11<br>94<br>5 | 7.<br>94<br>88<br>2 | 7.<br>73<br>63      | 10<br>.6<br>64<br>86 | 9.<br>33<br>91<br>8 | 9.<br>04<br>15<br>6 | 4.2<br>290<br>784<br>81  | 2.0<br>803<br>433<br>33  | 4.2<br>29<br>07<br>84<br>81 | U<br>p           | 0.0<br>02<br>87<br>64<br>49 | 0.2<br>31<br>33<br>53<br>69 |
| 34<br>82<br>49 | CCL15<br>-CCL1<br>4 | CCL15-CCL14<br>readthrough<br>(NMD candidate) | 6.<br>91<br>41<br>9 | 4.<br>95<br>20<br>6 | 5.<br>09<br>48<br>1 | 6.<br>65<br>26<br>4  | 7.<br>33<br>96<br>8 | 7.<br>94<br>89<br>6 | 3.1<br>603<br>258<br>85  | 1.6<br>600<br>733<br>33  | 3.1<br>60<br>32<br>58<br>85 | U<br>p           | 0.0<br>25<br>80<br>14<br>01 | 0.3<br>85<br>33<br>44<br>54 |
| 30<br>12       | HIST1<br>H2AE       | Histone cluster 1,<br>h2ae                    | 7.<br>10<br>37<br>1 | 6.<br>93<br>50<br>3 | 6.<br>46<br>35<br>1 | 7.<br>31<br>52<br>1  | 8.<br>92<br>16<br>8 | 7.<br>92<br>76<br>7 | 2.3<br>307<br>107<br>96  | 1.2<br>207<br>7          | 2.3<br>30<br>71<br>07<br>96 | U<br>p           | 0.0<br>24<br>57<br>24<br>66 | 0.3<br>83<br>08<br>92<br>58 |
| 83<br>82       | NME5                | NME/NM23<br>family member 5                   | 6.<br>35<br>42<br>3 | 6.<br>28<br>18<br>7 | 6.<br>49<br>28<br>1 | 5.<br>29<br>11<br>1  | 3.<br>68<br>70<br>9 | 4.<br>78<br>89<br>5 | -3.<br>451<br>571<br>412 | -1.<br>787<br>253<br>333 | 3.4<br>51<br>57<br>14<br>12 | D<br>o<br>w<br>n | 0.0<br>03<br>11<br>42<br>53 | 0.2<br>34<br>23<br>93<br>82 |
| 96<br>5        | CD58                | CD58 molecule                                 | 6.<br>95<br>92<br>2 | 5.<br>97<br>07<br>8 | 6.<br>08<br>22<br>7 | 8.<br>00<br>61<br>4  | 7.<br>89<br>56<br>2 | 7.<br>03<br>55<br>3 | 2.4<br>765<br>641<br>65  | 1.3<br>083<br>4          | 2.4<br>76<br>56<br>41<br>65 | U<br>p           | 0.0<br>11<br>05<br>78<br>95 | 0.3<br>24<br>27<br>76<br>54 |
| 62             | RRM2                | Ribonucleotide                                | 6.                  | 5.                  | 6.                  | 8.                   | 10                  | 7.                  | 5.5                      | 2.4                      | 5.5                         | U                | 0.0                         | 0.2                         |



|                |              |                                                                                                        |                     |                     |                     |                     |                     |                     |                          |                          |                             |                  |                             |                             |
|----------------|--------------|--------------------------------------------------------------------------------------------------------|---------------------|---------------------|---------------------|---------------------|---------------------|---------------------|--------------------------|--------------------------|-----------------------------|------------------|-----------------------------|-----------------------------|
| 41             |              | reductase M2                                                                                           | 31<br>92<br>1       | 97<br>91<br>3       | 23<br>09<br>8       | 30<br>06<br>2       | .1<br>06<br>24      | 53<br>40<br>6       | 424<br>864<br>32         | 705<br>333<br>33         | 42<br>48<br>64<br>32        | p                | 05<br>10<br>39<br>55        | 65<br>67<br>28<br>16        |
| 10<br>45<br>1  | VAV3         | Vav guanine<br>nucleotide<br>exchange factor 3                                                         | 5.<br>72<br>68<br>6 | 3.<br>58<br>66<br>7 | 3.<br>65<br>29<br>9 | 9.<br>71<br>36<br>2 | 9.<br>35<br>94<br>3 | 5.<br>91<br>70<br>1 | 16.<br>087<br>259<br>4   | 4.0<br>078<br>466<br>67  | 16.<br>08<br>72<br>59<br>4  | U<br>p           | 0.0<br>07<br>65<br>12<br>81 | 0.2<br>97<br>44<br>06<br>81 |
| 11<br>22<br>6  | GALN<br>T6   | Polypeptide<br>N-acetylgalactosa<br>minyltransferase 6                                                 | 5.<br>59<br>06<br>6 | 7.<br>05<br>62<br>4 | 6.<br>40<br>77<br>7 | 4.<br>80<br>41<br>6 | 4.<br>37<br>21<br>4 | 6.<br>04<br>06      | -2.<br>427<br>138<br>889 | -1.<br>279<br>256<br>667 | 2.4<br>27<br>13<br>88<br>89 | D<br>o<br>w<br>n | 0.0<br>46<br>59<br>43<br>39 | 0.4<br>40<br>05<br>65<br>62 |
| 28<br>44<br>17 | TMEM<br>150B | Transmembrane<br>protein 150B                                                                          | 4.<br>74<br>75<br>2 | 4.<br>76<br>56<br>3 | 4.<br>63<br>65<br>6 | 5.<br>57<br>29      | 6.<br>67<br>38<br>6 | 5.<br>12<br>99<br>6 | 2.1<br>077<br>006<br>79  | 1.0<br>756<br>7          | 2.1<br>07<br>70<br>06<br>79 | U<br>p           | 0.0<br>28<br>51<br>26<br>6  | 0.3<br>93<br>40<br>55<br>85 |
| 21<br>93<br>33 | USP12        | Ubiquitin specific<br>peptidase 12                                                                     | 5.<br>48<br>21<br>1 | 5.<br>24<br>64<br>8 | 5.<br>59<br>92<br>2 | 5.<br>98<br>52<br>1 | 6.<br>69<br>37<br>4 | 6.<br>91<br>85<br>5 | 2.1<br>285<br>878<br>99  | 1.0<br>898<br>966<br>67  | 2.1<br>28<br>58<br>78<br>99 | U<br>p           | 0.0<br>07<br>35<br>66<br>81 | 0.2<br>92<br>40<br>97<br>69 |
| 56<br>99<br>7  | ADCK<br>3    | Aarf domain<br>containing kinase<br>3                                                                  | 9.<br>17<br>81<br>9 | 9.<br>66<br>47<br>3 | 9.<br>82<br>68<br>7 | 9.<br>10<br>02<br>4 | 8.<br>64<br>22<br>9 | 7.<br>76<br>28<br>6 | -2.<br>077<br>430<br>194 | -1.<br>054<br>8          | 2.0<br>77<br>43<br>01<br>94 | D<br>o<br>w<br>n | 0.0<br>28<br>06<br>76<br>95 | 0.3<br>92<br>00<br>23<br>37 |
| 58<br>79       | RAC1         | Ras-related C3<br>botulinum toxin<br>substrate 1 (rho<br>family, small GTP<br>binding protein<br>Rac1) | 6.<br>96<br>94<br>6 | 7.<br>03<br>38<br>5 | 7.<br>46<br>15<br>8 | 8.<br>45<br>16      | 8.<br>03<br>67<br>1 | 8.<br>13<br>18<br>8 | 2.0<br>730<br>668<br>89  | 1.0<br>517<br>666<br>67  | 2.0<br>73<br>06<br>68<br>89 | U<br>p           | 0.0<br>03<br>27<br>22<br>62 | 0.2<br>36<br>31<br>05<br>13 |
| 28<br>34<br>17 | DPY19<br>L2  | Dpy-19-like 2 (C.<br>Elegans)                                                                          | 4.<br>65<br>20<br>6 | 3.<br>31<br>09<br>2 | 3.<br>19<br>81<br>9 | 4.<br>85<br>36<br>3 | 5.<br>39<br>53<br>4 | 5.<br>51<br>77<br>1 | 2.8<br>982<br>258<br>01  | 1.5<br>351<br>7          | 2.8<br>98<br>22<br>58<br>01 | U<br>p           | 0.0<br>08<br>07<br>09<br>57 | 0.2<br>99<br>13<br>95<br>54 |
| 23<br>44<br>6  | SLC44<br>A1  | Solute carrier<br>family 44 (choline<br>transporter),<br>member 1                                      | 6.<br>63<br>85<br>7 | 5.<br>88<br>66<br>7 | 6.<br>72<br>55<br>3 | 8.<br>57<br>80<br>8 | 7.<br>62<br>91<br>2 | 7.<br>22<br>73      | 2.6<br>291<br>139<br>4   | 1.3<br>945<br>766<br>67  | 2.6<br>29<br>11<br>39       | U<br>p           | 0.0<br>11<br>54<br>70       | 0.3<br>27<br>65<br>98       |

|                           |                             |                                                        |                     |                     |                     |                     |                     |                     |                          |                          |                             |                  |                             |                             |
|---------------------------|-----------------------------|--------------------------------------------------------|---------------------|---------------------|---------------------|---------------------|---------------------|---------------------|--------------------------|--------------------------|-----------------------------|------------------|-----------------------------|-----------------------------|
|                           |                             |                                                        |                     |                     |                     |                     |                     |                     |                          |                          | 4                           |                  | 08                          | 66                          |
| 10<br>05<br>26<br>83<br>2 | PHOS<br>PHO2-<br>KLHL<br>23 | PHOSPHO2-KLH<br>L23 readthrough                        | 5.<br>06<br>74      | 4.<br>81<br>49<br>1 | 4.<br>41<br>11<br>1 | 6.<br>28<br>07<br>1 | 6.<br>65<br>03<br>5 | 5.<br>28<br>46<br>3 | 2.4<br>749<br>910<br>93  | 1.3<br>074<br>233<br>33  | 2.4<br>74<br>99<br>10<br>93 | U<br>p           | 0.0<br>11<br>58<br>93<br>72 | 0.3<br>27<br>65<br>98<br>66 |
| 67<br>2                   | BRCA<br>1                   | Breast cancer 1                                        | 4.<br>57<br>17      | 4.<br>37<br>39<br>6 | 4.<br>43<br>21<br>5 | 6.<br>05<br>03<br>3 | 5.<br>71<br>96<br>5 | 5.<br>52<br>45<br>1 | 2.4<br>717<br>965<br>47  | 1.3<br>055<br>6          | 2.4<br>71<br>79<br>65<br>47 | U<br>p           | 0.0<br>00<br>46<br>77<br>92 | 0.1<br>64<br>24<br>82<br>94 |
| 30<br>00<br>1             | ERO1<br>A                   | Endoplasmic<br>reticulum<br>oxidoreductase $\alpha$    | 5.<br>40<br>63<br>6 | 5.<br>60<br>06      | 5.<br>49<br>14      | 5.<br>93<br>14<br>5 | 7.<br>09<br>48<br>4 | 6.<br>51<br>11<br>2 | 2.0<br>181<br>265<br>82  | 1.0<br>130<br>166<br>67  | 2.0<br>18<br>12<br>65<br>82 | U<br>p           | 0.0<br>15<br>14<br>75<br>92 | 0.3<br>48<br>67<br>95<br>47 |
| 10<br>63<br>5             | RAD5<br>1AP1                | RAD51 associated<br>protein 1                          | 4.<br>62<br>32<br>5 | 4.<br>46<br>32<br>9 | 3.<br>99<br>97<br>9 | 5.<br>76<br>89<br>9 | 5.<br>88<br>11<br>4 | 4.<br>98<br>98<br>4 | 2.2<br>729<br>196<br>22  | 1.1<br>845<br>466<br>67  | 2.2<br>72<br>91<br>96<br>22 | U<br>p           | 0.0<br>06<br>20<br>77<br>68 | 0.2<br>81<br>25<br>22<br>73 |
| 23<br>58<br>4             | VSIG2                       | V-set and<br>immunoglobulin<br>domain containing<br>2  | 7.<br>85<br>41<br>5 | 10<br>.5<br>29<br>1 | 9.<br>95<br>81<br>3 | 6.<br>45<br>09<br>6 | 5.<br>75<br>32<br>9 | 8.<br>09<br>21<br>4 | -6.<br>415<br>951<br>932 | -2.<br>681<br>663<br>333 | 6.4<br>15<br>95<br>19<br>32 | D<br>o<br>w<br>n | 0.0<br>14<br>86<br>06<br>73 | 0.3<br>47<br>51<br>10<br>24 |
| 65<br>05<br>5             | REEP1                       | Receptor<br>accessory protein<br>1                     | 6.<br>79<br>74<br>2 | 7.<br>21<br>93<br>5 | 7.<br>72<br>61<br>6 | 5.<br>58<br>68<br>9 | 4.<br>71<br>41<br>4 | 4.<br>79<br>09<br>4 | -4.<br>649<br>213<br>462 | -2.<br>216<br>986<br>667 | 4.6<br>49<br>21<br>34<br>62 | D<br>o<br>w<br>n | 0.0<br>00<br>38<br>05<br>46 | 0.1<br>60<br>90<br>15<br>41 |
| 22<br>96                  | FOXC<br>1                   | Forkhead box C1                                        | 7.<br>93<br>22<br>6 | 5.<br>87<br>52<br>1 | 7.<br>50<br>16<br>8 | 5.<br>64<br>75<br>7 | 5.<br>53<br>49<br>2 | 4.<br>96<br>33<br>4 | -3.<br>296<br>892<br>089 | -1.<br>721<br>106<br>667 | 3.2<br>96<br>89<br>20<br>89 | D<br>o<br>w<br>n | 0.0<br>14<br>86<br>32<br>14 | 0.3<br>47<br>51<br>10<br>24 |
| 21<br>50                  | F2RL1                       | Coagulation factor<br>II (thrombin)<br>receptor-like 1 | 5.<br>40<br>43<br>1 | 4.<br>10<br>66<br>5 | 4.<br>39<br>19<br>7 | 5.<br>18<br>21<br>1 | 5.<br>84<br>34<br>2 | 5.<br>92<br>68<br>3 | 2.0<br>229<br>724<br>42  | 1.0<br>164<br>766<br>67  | 2.0<br>22<br>97<br>24<br>42 | U<br>p           | 0.0<br>34<br>73<br>95<br>41 | 0.4<br>08<br>42<br>39<br>81 |
| 72<br>5                   | C4BPB                       | Complement<br>component 4<br>binding protein, $\beta$  | 4.<br>13<br>31      | 5.<br>58<br>71      | 5.<br>31<br>09      | 7.<br>28<br>90      | 6.<br>31<br>92      | 6.<br>62<br>98      | 3.3<br>302<br>488        | 1.7<br>356<br>3          | 3.3<br>30<br>24             | U<br>p           | 0.0<br>05<br>74             | 0.2<br>74<br>75             |

|                |             |                                                               |                     |                     |                     |                     |                     |                     |                          |                          |                             |                  |                             |                             |
|----------------|-------------|---------------------------------------------------------------|---------------------|---------------------|---------------------|---------------------|---------------------|---------------------|--------------------------|--------------------------|-----------------------------|------------------|-----------------------------|-----------------------------|
|                |             |                                                               | 1                   | 7                   | 6                   | 7                   |                     | 6                   | 84                       |                          | 88                          |                  | 55                          | 30                          |
|                |             |                                                               |                     |                     |                     |                     |                     |                     |                          |                          | 84                          |                  | 58                          | 11                          |
| 83<br>18       | CDC45       | Cell division cycle<br>45                                     | 5.<br>04<br>62<br>9 | 4.<br>40<br>28      | 4.<br>73<br>71<br>4 | 5.<br>77<br>22<br>6 | 6.<br>35<br>81<br>8 | 5.<br>44<br>27<br>2 | 2.1<br>870<br>355<br>43  | 1.1<br>289<br>766<br>67  | 2.1<br>87<br>03<br>55<br>43 | U<br>p           | 0.0<br>07<br>42<br>12<br>79 | 0.2<br>93<br>16<br>68<br>02 |
| 90<br>36<br>2  | FAM11<br>0B | Family with<br>sequence<br>similarity<br>member B             | 5.<br>58<br>30<br>8 | 5.<br>74<br>67<br>7 | 5.<br>63<br>87<br>6 | 4.<br>53<br>71<br>1 | 4.<br>22<br>81<br>7 | 3.<br>71<br>77<br>1 | -2.<br>819<br>045<br>311 | -1.<br>495<br>206<br>667 | 2.8<br>19<br>04<br>53<br>11 | D<br>o<br>w<br>n | 0.0<br>00<br>55<br>77<br>17 | 0.1<br>64<br>81<br>87<br>25 |
| 27<br>07<br>7  | B9D1        | B9 protein domain<br>1                                        | 6.<br>87<br>76<br>1 | 7.<br>56<br>52      | 7.<br>14<br>73<br>4 | 6.<br>36<br>43<br>5 | 5.<br>78<br>53      | 6.<br>15<br>17<br>6 | -2.<br>137<br>977<br>495 | -1.<br>096<br>246<br>667 | 2.1<br>37<br>97<br>74<br>95 | D<br>o<br>w<br>n | 0.0<br>05<br>03<br>10<br>01 | 0.2<br>64<br>76<br>00<br>1  |
| 22<br>16<br>92 | PHAC<br>TR1 | Phosphatase and<br>actin regulator 1                          | 5.<br>81<br>11<br>4 | 6.<br>87<br>13<br>4 | 6.<br>13<br>58<br>8 | 4.<br>57<br>64<br>6 | 5.<br>45<br>17<br>8 | 5.<br>63<br>60<br>8 | -2.<br>072<br>463<br>462 | -1.<br>051<br>346<br>667 | 2.0<br>72<br>46<br>34<br>62 | D<br>o<br>w<br>n | 0.0<br>30<br>49<br>57<br>7  | 0.3<br>99<br>27<br>58<br>89 |
| 88<br>29       | NRP1        | Neuropilin 1                                                  | 6.<br>66<br>98<br>3 | 5.<br>54<br>97<br>8 | 6.<br>30<br>97<br>5 | 4.<br>77<br>86<br>5 | 5.<br>16<br>17<br>6 | 4.<br>47<br>57<br>8 | -2.<br>586<br>599<br>459 | -1.<br>371<br>056<br>667 | 2.5<br>86<br>59<br>94<br>59 | D<br>o<br>w<br>n | 0.0<br>05<br>20<br>04<br>58 | 0.2<br>66<br>63<br>60<br>57 |
| 23<br>15<br>7  | SEPT6       | Septin 6                                                      | 6.<br>79<br>91<br>3 | 7.<br>23<br>57<br>4 | 7.<br>38<br>16<br>7 | 5.<br>03<br>54<br>3 | 6.<br>24<br>22<br>5 | 6.<br>71<br>35<br>5 | -2.<br>206<br>515<br>681 | -1.<br>141<br>77         | 2.2<br>06<br>51<br>56<br>81 | D<br>o<br>w<br>n | 0.0<br>36<br>73<br>46<br>01 | 0.4<br>14<br>09<br>55<br>77 |
| 50<br>25       | P2RX4       | Purinergic<br>receptor P2X,<br>ligand gated ion<br>channel, 4 | 7.<br>61<br>19<br>4 | 7.<br>08<br>38<br>3 | 7.<br>00<br>78<br>3 | 5.<br>06<br>64<br>7 | 6.<br>87<br>90<br>7 | 6.<br>12<br>71<br>5 | -2.<br>313<br>862<br>817 | -1.<br>210<br>303<br>333 | 2.3<br>13<br>86<br>28<br>17 | D<br>o<br>w<br>n | 0.0<br>35<br>00<br>86<br>79 | 0.4<br>08<br>48<br>58<br>2  |
| 25<br>37       | IFI6        | Interferon,<br>$\alpha$ -inducible protein<br>6               | 9.<br>67<br>04<br>8 | 8.<br>80<br>32<br>2 | 8.<br>77<br>06<br>7 | 7.<br>23<br>77      | 7.<br>87<br>49<br>9 | 7.<br>86<br>65<br>9 | -2.<br>679<br>003<br>873 | -1.<br>421<br>696<br>667 | 2.6<br>79<br>00<br>38<br>73 | D<br>o<br>w<br>n | 0.0<br>03<br>74<br>69<br>21 | 0.2<br>38<br>59<br>85<br>3  |
| 25<br>39       | G6PD        | Glucose-6-phosph<br>ate dehydrogenase                         | 9.<br>07            | 7.<br>06            | 7.<br>24            | 6.<br>60            | 6.<br>57            | 6.<br>44            | -2.<br>388               | -1.<br>255               | 2.3<br>88                   | D<br>o           | 0.0<br>47                   | 0.4<br>42                   |

|               |               |                                                          |                      |                     |                      |                     |                     |                     |                          |                          |                             |                  |                             |                             |
|---------------|---------------|----------------------------------------------------------|----------------------|---------------------|----------------------|---------------------|---------------------|---------------------|--------------------------|--------------------------|-----------------------------|------------------|-----------------------------|-----------------------------|
|               |               |                                                          | 54<br>6              | 97<br>2             | 56<br>6              | 30<br>9             | 57<br>9             | 44<br>2             | 072<br>55                | 846<br>667               | 07<br>25<br>5               | w<br>n           | 58<br>09<br>72              | 91<br>47<br>71              |
| 51<br>58<br>2 | AZIN1         | Antizyme inhibitor 1                                     | 5.<br>82<br>52<br>8  | 5.<br>91<br>81      | 5.<br>83<br>94<br>7  | 7.<br>38<br>78<br>8 | 7.<br>95<br>35<br>4 | 5.<br>87<br>33<br>5 | 2.3<br>144<br>028<br>42  | 1.2<br>106<br>4          | 2.3<br>14<br>40<br>28<br>42 | U<br>p           | 0.0<br>48<br>59<br>53<br>62 | 0.4<br>45<br>56<br>96<br>31 |
| 37            | ACAD<br>VL    | Acyl-coa dehydrogenase, very long chain                  | 9.<br>63<br>76<br>3  | 9.<br>64<br>11      | 9.<br>34<br>27<br>8  | 9.<br>00<br>66<br>7 | 8.<br>25<br>04<br>6 | 8.<br>12<br>73<br>9 | -2.<br>112<br>566<br>37  | -1.<br>078<br>996<br>667 | 2.1<br>12<br>56<br>63<br>7  | D<br>o<br>w<br>n | 0.0<br>07<br>50<br>24<br>87 | 0.2<br>94<br>41<br>93<br>61 |
| 83<br>40      | HIST1<br>H2BL | Histone cluster 1, h2bl                                  | 6.<br>54<br>89<br>3  | 5.<br>51<br>12<br>3 | 6.<br>19<br>17<br>3  | 6.<br>88<br>60<br>5 | 8.<br>14<br>72<br>1 | 6.<br>63<br>54<br>8 | 2.2<br>022<br>068<br>72  | 1.1<br>389<br>5          | 2.2<br>02<br>20<br>68<br>72 | U<br>p           | 0.0<br>43<br>57<br>72<br>37 | 0.4<br>32<br>33<br>09<br>01 |
| 67<br>91      | AURK<br>APS1  | Aurora kinase A pseudogene 1                             | 4.<br>22<br>84<br>3  | 4.<br>39<br>75<br>6 | 4.<br>30<br>84<br>3  | 5.<br>26<br>47<br>5 | 5.<br>97<br>38<br>3 | 5.<br>00<br>88<br>8 | 2.1<br>500<br>149<br>13  | 1.1<br>043<br>466<br>67  | 2.1<br>50<br>01<br>49<br>13 | U<br>p           | 0.0<br>05<br>39<br>52<br>36 | 0.2<br>69<br>32<br>15<br>26 |
| 31<br>27      | HLA-<br>DRB5  | Major histocompatibility complex, class II, DR $\beta$ 5 | 10<br>.7<br>30<br>83 | 8.<br>51<br>18<br>7 | 10<br>.2<br>04<br>46 | 4.<br>14<br>84<br>5 | 4.<br>99<br>48      | 8.<br>45<br>97<br>2 | -15<br>.43<br>424<br>849 | -3.<br>948<br>063<br>333 | 15.<br>43<br>42<br>48<br>49 | D<br>o<br>w<br>n | 0.0<br>10<br>61<br>67<br>79 | 0.3<br>23<br>12<br>55<br>57 |
| 31<br>48      | HMGB<br>2     | High mobility group box 2                                | 5.<br>19<br>58<br>5  | 3.<br>83<br>44      | 3.<br>96<br>44       | 6.<br>45<br>48<br>4 | 8.<br>35<br>04<br>7 | 5.<br>92<br>07<br>5 | 5.9<br>675<br>413<br>86  | 2.5<br>771<br>366<br>67  | 5.9<br>67<br>54<br>13<br>86 | U<br>p           | 0.0<br>06<br>61<br>81<br>06 | 0.2<br>86<br>65<br>49<br>71 |
| 96<br>6       | CD59          | CD59 molecule, complement regulatory protein             | 9.<br>36<br>96       | 8.<br>76<br>23<br>5 | 8.<br>71<br>30<br>9  | 7.<br>88<br>09<br>3 | 7.<br>79<br>69<br>6 | 7.<br>50<br>27<br>4 | -2.<br>331<br>841<br>938 | -1.<br>221<br>47         | 2.3<br>31<br>84<br>19<br>38 | D<br>o<br>w<br>n | 0.0<br>02<br>30<br>25<br>18 | 0.2<br>12<br>16<br>29<br>49 |
| 84<br>59      | TPST2         | Tyrosylprotein sulfotransferase 2                        | 6.<br>22<br>29<br>1  | 7.<br>63<br>96<br>8 | 7.<br>09<br>25<br>5  | 5.<br>37<br>36<br>6 | 5.<br>73<br>14<br>2 | 4.<br>11<br>90<br>2 | -3.<br>758<br>994<br>141 | -1.<br>910<br>346<br>667 | 3.7<br>58<br>99<br>41<br>41 | D<br>o<br>w<br>n | 0.0<br>07<br>97<br>27<br>17 | 0.2<br>99<br>13<br>95<br>54 |
| 90            | N4BP2         | NEDD4 binding                                            | 4.                   | 4.                  | 4.                   | 4.                  | 6.                  | 5.                  | 2.3                      | 1.2                      | 2.3                         | U                | 0.0                         | 0.3                         |

|                |               |                                                                              |                      |                     |                     |                      |                      |                      |                          |                            |                             |                  |                             |                             |
|----------------|---------------|------------------------------------------------------------------------------|----------------------|---------------------|---------------------|----------------------|----------------------|----------------------|--------------------------|----------------------------|-----------------------------|------------------|-----------------------------|-----------------------------|
| 63<br>4        | L1            | protein 2-like 1                                                             | 59<br>83<br>8        | 35<br>42<br>8       | 07<br>36<br>3       | 60<br>42<br>5        | 29<br>38<br>8        | 83<br>36<br>6        | 540<br>854<br>13         | 351<br>666<br>67           | 54<br>08<br>54<br>13        | p                | 24<br>99<br>66<br>45        | 83<br>71<br>27<br>62        |
| 65<br>05<br>9  | RAPH<br>1     | Ras association<br>(ralgds/AF-6) and<br>pleckstrin<br>homology<br>domains 1  | 4.<br>71<br>38<br>8  | 4.<br>74<br>09<br>5 | 4.<br>71<br>16<br>7 | 6.<br>64<br>90<br>6  | 6.<br>22<br>59<br>2  | 5.<br>87<br>40<br>4  | 2.8<br>828<br>717<br>69  | 1.5<br>275<br>066<br>67    | 2.8<br>82<br>87<br>17<br>69 | U<br>p           | 0.0<br>00<br>44<br>74<br>97 | 0.1<br>64<br>24<br>82<br>94 |
| 31<br>77<br>72 | HIST2<br>H2AB | Histone cluster 2,<br>h2ab                                                   | 7.<br>23<br>94<br>1  | 6.<br>65<br>26<br>9 | 6.<br>69<br>37<br>8 | 8.<br>57<br>45<br>9  | 8.<br>86<br>54<br>5  | 7.<br>47<br>83<br>5  | 2.7<br>210<br>623<br>22  | 1.4<br>441<br>7<br>22      | 2.7<br>21<br>06<br>23<br>22 | U<br>p           | 0.0<br>08<br>51<br>74<br>24 | 0.3<br>07<br>29<br>63<br>95 |
| 86<br>12       | PLPP2         | Phospholipid<br>phosphatase 2                                                | 9.<br>52<br>88<br>4  | 9.<br>37<br>93<br>9 | 9.<br>69<br>94<br>3 | 8.<br>40<br>96<br>2  | 7.<br>55<br>79<br>1  | 8.<br>04<br>54<br>1  | -2.<br>891<br>009<br>467 | -1.<br>531<br>573<br>333   | 2.8<br>91<br>00<br>94<br>67 | D<br>o<br>w<br>n | 0.0<br>00<br>83<br>82<br>39 | 0.1<br>81<br>04<br>09<br>24 |
| 10<br>62<br>7  | MYL1<br>2A    | Myosin light chain<br>12A                                                    | 10<br>.0<br>13<br>83 | 9.<br>35<br>56<br>4 | 9.<br>78<br>43      | 10<br>.9<br>18<br>36 | 10<br>.6<br>04<br>27 | 11<br>.0<br>36<br>65 | 2.1<br>964<br>444<br>3   | 1.1<br>351<br>7<br>44<br>3 | 2.1<br>96<br>44<br>44<br>3  | U<br>p           | 0.0<br>03<br>01<br>45<br>91 | 0.2<br>34<br>00<br>38<br>89 |
| 32<br>13       | HOXB<br>3     | Homeobox B3                                                                  | 5.<br>14<br>78<br>7  | 3.<br>90<br>79<br>4 | 4.<br>11<br>99<br>1 | 7.<br>10<br>24<br>5  | 6.<br>17<br>44<br>7  | 7.<br>84<br>02<br>1  | 6.2<br>642<br>277<br>53  | 2.6<br>471<br>366<br>67    | 6.2<br>64<br>22<br>77<br>53 | U<br>p           | 0.0<br>01<br>17<br>51<br>28 | 0.1<br>86<br>14<br>79<br>2  |
| 26<br>78       | GGT1          | Γ-glutamyltransfer<br>ase 1                                                  | 9.<br>16<br>15<br>7  | 9.<br>31<br>31<br>4 | 8.<br>59<br>69<br>8 | 7.<br>48<br>88<br>1  | 7.<br>56<br>93<br>1  | 5.<br>95<br>58<br>1  | -4.<br>053<br>739<br>364 | -2.<br>019<br>253<br>333   | 4.0<br>53<br>73<br>93<br>64 | D<br>o<br>w<br>n | 0.0<br>03<br>67<br>15<br>27 | 0.2<br>38<br>59<br>85<br>3  |
| 44<br>03<br>54 | SMG1<br>P2    | SMG1 pseudogene<br>2                                                         | 5.<br>95<br>62<br>4  | 6.<br>50<br>92<br>3 | 6.<br>39<br>43<br>8 | 8.<br>01<br>35<br>7  | 7.<br>61<br>26<br>5  | 7.<br>36<br>25<br>8  | 2.5<br>960<br>472<br>95  | 1.3<br>763<br>166<br>67    | 2.5<br>96<br>04<br>72<br>95 | U<br>p           | 0.0<br>01<br>36<br>24<br>71 | 0.1<br>87<br>10<br>78<br>18 |
| 22<br>89<br>4  | DIS3          | DIS3 homolog,<br>exosome<br>endoribonuclease<br>and 3'-5'<br>exoribonuclease | 3.<br>99<br>73       | 4.<br>50<br>92<br>9 | 4.<br>41<br>70<br>8 | 5.<br>45<br>98<br>4  | 5.<br>89<br>72<br>5  | 5.<br>29<br>12<br>9  | 2.3<br>645<br>571<br>31  | 1.2<br>415<br>7<br>31      | 2.3<br>64<br>55<br>71<br>31 | U<br>p           | 0.0<br>01<br>55<br>68<br>15 | 0.1<br>87<br>10<br>78<br>18 |

|                |               |                                                                            |                     |                     |                     |                     |                      |                     |                          |                          |                             |                  |                             |                             |
|----------------|---------------|----------------------------------------------------------------------------|---------------------|---------------------|---------------------|---------------------|----------------------|---------------------|--------------------------|--------------------------|-----------------------------|------------------|-----------------------------|-----------------------------|
| 26<br>50<br>8  | HEYL          | Hes-related family<br>bhlh transcription<br>factor with YRPW<br>motif-like | 5.<br>86<br>12      | 5.<br>80<br>12<br>3 | 5.<br>63<br>37      | 5.<br>87<br>36<br>9 | 7.<br>91<br>67<br>2  | 6.<br>98<br>96<br>8 | 2.2<br>366<br>197<br>45  | 1.1<br>613<br>2          | 2.2<br>36<br>61<br>97<br>45 | U<br>p           | 0.0<br>49<br>06<br>12<br>03 | 0.4<br>46<br>17<br>48       |
| 19<br>64<br>41 | ZFC3H<br>1    | Zinc finger,<br>C3H1-type<br>containing                                    | 4.<br>74<br>58<br>3 | 5.<br>01<br>9       | 4.<br>56<br>71<br>4 | 7.<br>00<br>22<br>2 | 5.<br>59<br>47<br>7  | 5.<br>63<br>56<br>1 | 2.4<br>626<br>472<br>66  | 1.3<br>002<br>1          | 2.4<br>62<br>64<br>72<br>66 | U<br>p           | 0.0<br>15<br>06<br>64<br>08 | 0.3<br>48<br>31<br>59<br>84 |
| 50<br>69       | PAPPA         | Pregnancy-associat<br>ed plasma protein<br>A, pappalysin 1                 | 6.<br>47<br>72<br>6 | 6.<br>18<br>15      | 5.<br>60<br>64<br>7 | 4.<br>53<br>37<br>1 | 5.<br>75<br>06<br>6  | 4.<br>61<br>61<br>9 | -2.<br>175<br>816<br>163 | -1.<br>121<br>556<br>667 | 2.1<br>75<br>81<br>61<br>63 | D<br>o<br>w<br>n | 0.0<br>25<br>93<br>86<br>12 | 0.3<br>85<br>76<br>15<br>64 |
| 34<br>90       | IGFBP<br>7    | Insulin like growth<br>factor binding<br>protein 7                         | 6.<br>08<br>08<br>5 | 6.<br>32<br>19<br>5 | 6.<br>00<br>44<br>3 | 6.<br>72<br>94<br>9 | 10<br>.5<br>02<br>31 | 8.<br>04<br>53<br>5 | 4.8<br>904<br>707<br>15  | 2.2<br>899<br>733<br>33  | 4.8<br>90<br>47<br>07<br>15 | U<br>p           | 0.0<br>33<br>10<br>13<br>16 | 0.4<br>06<br>31<br>50<br>59 |
| 33<br>78<br>73 | HIST2<br>H2BC | Histone cluster 2,<br>h2bc (pseudogene)                                    | 5.<br>96<br>64<br>8 | 6.<br>55<br>48      | 6.<br>16<br>66<br>2 | 9.<br>62<br>84<br>1 | 7.<br>40<br>08<br>8  | 7.<br>74<br>48<br>1 | 4.0<br>804<br>643<br>37  | 2.0<br>287<br>333<br>33  | 4.0<br>80<br>46<br>43<br>37 | U<br>p           | 0.0<br>09<br>61<br>12<br>85 | 0.3<br>13<br>66<br>02<br>93 |
| 97<br>68       | KIAA0<br>101  | KIAA0101                                                                   | 4.<br>22<br>31<br>8 | 3.<br>68<br>41<br>7 | 3.<br>76<br>06<br>3 | 6.<br>22<br>54<br>6 | 5.<br>05<br>3<br>2   | 5.<br>10<br>28<br>2 | 2.9<br>713<br>117<br>9   | 1.5<br>711               | 2.9<br>71<br>31<br>17<br>9  | U<br>p           | 0.0<br>03<br>19<br>96<br>37 | 0.2<br>34<br>23<br>93<br>82 |
| 68<br>09       | STX3          | Syntaxin 3                                                                 | 7.<br>67<br>59<br>7 | 6.<br>48<br>76      | 6.<br>95<br>84<br>2 | 5.<br>39<br>48<br>7 | 6.<br>74<br>64<br>9  | 5.<br>12<br>72<br>1 | -2.<br>435<br>931<br>11  | -1.<br>284<br>473<br>333 | 2.4<br>35<br>93<br>11<br>1  | D<br>o<br>w<br>n | 0.0<br>36<br>69<br>69<br>01 | 0.4<br>14<br>09<br>00<br>13 |
| 40<br>90       | SMAD<br>5     | SMAD family<br>member 5                                                    | 3.<br>36<br>86<br>7 | 4.<br>06<br>74<br>4 | 4.<br>28<br>74<br>2 | 5.<br>52<br>38<br>3 | 4.<br>96<br>45<br>4  | 5.<br>01<br>44<br>4 | 2.3<br>945<br>368<br>98  | 1.2<br>597<br>466<br>67  | 2.3<br>94<br>53<br>68<br>98 | U<br>p           | 0.0<br>03<br>87<br>81<br>25 | 0.2<br>39<br>96<br>90<br>73 |
| 31<br>61       | HMM<br>R      | Hyaluronan-media<br>ted motility<br>receptor<br>(RHAMM)                    | 4.<br>30<br>32<br>4 | 3.<br>73<br>56<br>5 | 4.<br>12<br>65<br>5 | 5.<br>35<br>42      | 5.<br>28<br>14<br>1  | 4.<br>93<br>64<br>8 | 2.1<br>970<br>230<br>41  | 1.1<br>355<br>5          | 2.1<br>97<br>02<br>30       | U<br>p           | 0.0<br>01<br>60<br>76       | 0.1<br>87<br>19<br>40       |

|                           |               |                                                     |         |         |         |         |         |         |           |           |           |                  |           |           |    |
|---------------------------|---------------|-----------------------------------------------------|---------|---------|---------|---------|---------|---------|-----------|-----------|-----------|------------------|-----------|-----------|----|
|                           |               |                                                     |         |         |         |         |         |         |           |           |           | 41               |           | 96        | 74 |
| 38<br>33                  | KIFC1         | Kinesin family member C1                            | 6.20335 | 5.75907 | 5.87767 | 7.14478 | 7.06133 | 6.80356 | 2.0799180 | 1.0565266 | 2.0799180 | U<br>p           | 0.002142  | 0.2116945 |    |
| 55<br>63<br>5             | DEPD<br>C1    | DEP domain containing 1                             | 3.92367 | 3.60802 | 3.84908 | 4.68052 | 5.79284 | 4.66817 | 2.3843345 | 1.2535866 | 2.3843345 | U<br>p           | 0.0069935 | 0.2889644 |    |
| 54<br>68                  | PPAR<br>G     | Peroxisome proliferator-activated receptor $\gamma$ | 6.05594 | 4.93721 | 5.91009 | 7.98514 | 7.19123 | 6.33525 | 2.9001482 | 1.5361266 | 2.9001482 | U<br>p           | 0.0160695 | 0.3523137 |    |
| 31<br>31                  | HLF           | Hepatic leukemia factor                             | 6.08722 | 6.3909  | 6.82765 | 5.93001 | 5.46467 | 4.60748 | -2.145335 | -1.101203 | 2.145335  | D<br>o<br>w<br>n | 0.0237793 | 0.3812689 |    |
| 10<br>05<br>07<br>42<br>0 | LINC0<br>1605 | Long intergenic non-protein coding RNA 1605         | 4.19352 | 4.1728  | 4.3857  | 6.67968 | 5.43076 | 4.47511 | 2.4247623 | 1.2778433 | 2.4247623 | U<br>p           | 0.0424747 | 0.4317319 |    |
| 63<br>87<br>4             | ABHD<br>4     | Abhydrolase domain containing 4                     | 7.67186 | 7.12492 | 7.24072 | 6.659   | 6.22574 | 5.95844 | -2.091860 | -1.064786 | 2.091860  | D<br>o<br>w<br>n | 0.0059363 | 0.2794817 |    |
| 10<br>21<br>7             | CTDS<br>PL    | CTD small phosphatase like                          | 7.80733 | 7.70209 | 8.30779 | 6.82378 | 6.68742 | 6.64577 | -2.567705 | -1.36048  | 2.567705  | D<br>o<br>w<br>n | 0.0015805 | 0.1871078 |    |
| 15<br>47<br>96            | AMOT          | Angiomotin                                          | 4.86277 | 5.19885 | 5.60081 | 4.37187 | 4.428   | 3.66991 | -2.24399  | -1.166056 | 2.24399   | D<br>o<br>w<br>n | 0.0040389 | 0.2435152 |    |
| 90<br>99                  | USP2          | Ubiquitin specific peptidase 2                      | 5.7871  | 5.6322  | 5.4527  | 4.0581  | 4.43670 | 4.4274  | -2.416898 | -1.273156 | 2.416898  | D<br>o<br>w      | 0.0072    | 0.17263   |    |

|                |              |                                                              |                      |                     |                      |                     |                     |                     |                          |                          |                             |                  |                             |                             |
|----------------|--------------|--------------------------------------------------------------|----------------------|---------------------|----------------------|---------------------|---------------------|---------------------|--------------------------|--------------------------|-----------------------------|------------------|-----------------------------|-----------------------------|
|                |              |                                                              | 8                    | 4                   | 5                    | 5                   | 8                   | 7                   | 131                      | 667                      | 81                          | n                | 90                          | 18                          |
|                |              |                                                              |                      |                     |                      |                     |                     |                     |                          |                          | 31                          |                  | 76                          | 47                          |
| 90<br>76       | CLDN<br>1    | Claudin 1                                                    | 7.<br>21<br>42       | 5.<br>52<br>71<br>9 | 5.<br>46<br>18<br>7  | 9.<br>61<br>06<br>2 | 6.<br>74<br>45      | 8.<br>20<br>16      | 4.3<br>403<br>759<br>2   | 2.1<br>178<br>2          | 4.3<br>40<br>37<br>59<br>2  | U<br>p           | 0.0<br>31<br>32<br>03<br>56 | 0.4<br>01<br>10<br>39<br>72 |
| 57<br>21<br>2  | TP73-<br>AS1 | TP73 antisense<br>RNA 1                                      | 6.<br>94<br>16<br>1  | 7.<br>14<br>03<br>2 | 6.<br>86<br>24<br>6  | 5.<br>49<br>04<br>9 | 5.<br>84<br>17<br>1 | 6.<br>33<br>11<br>3 | -2.<br>134<br>187<br>11  | -1.<br>093<br>686<br>667 | 2.1<br>34<br>18<br>71<br>1  | D<br>o<br>w<br>n | 0.0<br>04<br>81<br>46<br>83 | 0.2<br>60<br>26<br>39<br>27 |
| 84<br>58       | TTF2         | Transcription<br>termination factor,<br>RNA polymerase<br>II | 5.<br>31<br>36<br>5  | 4.<br>83<br>45<br>5 | 5.<br>56<br>86<br>1  | 7.<br>03<br>04<br>2 | 6.<br>68<br>70<br>7 | 6.<br>51<br>09<br>1 | 2.8<br>360<br>114<br>03  | 1.5<br>038<br>633<br>33  | 2.8<br>36<br>01<br>14<br>03 | U<br>p           | 0.0<br>00<br>87<br>63<br>87 | 0.1<br>81<br>04<br>09<br>24 |
| 71<br>66       | TPH1         | Tryptophan<br>hydroxylase 1                                  | 5.<br>25<br>01<br>9  | 7.<br>47<br>19<br>2 | 7.<br>00<br>66       | 4.<br>88<br>36<br>4 | 4.<br>70<br>98<br>2 | 5.<br>37<br>32<br>1 | -3.<br>004<br>961<br>832 | -1.<br>587<br>346<br>667 | 3.0<br>04<br>96<br>18<br>32 | D<br>o<br>w<br>n | 0.0<br>26<br>41<br>67<br>64 | 0.3<br>87<br>35<br>84<br>1  |
| 15<br>12<br>58 | SLC38<br>A11 | Solute carrier<br>family 38, member<br>11                    | 6.<br>06<br>85<br>4  | 9.<br>22<br>41<br>7 | 8.<br>66<br>99<br>2  | 3.<br>77<br>14<br>1 | 6.<br>13<br>54<br>7 | 3.<br>79<br>78<br>6 | -10<br>.69<br>820<br>365 | -3.<br>419<br>296<br>667 | 10.<br>69<br>82<br>03<br>65 | D<br>o<br>w<br>n | 0.0<br>09<br>65<br>02<br>91 | 0.3<br>13<br>66<br>02<br>93 |
| 84<br>66<br>8  | FAM1<br>26A  | Family with<br>sequence<br>similarity<br>member A            | 5.<br>34<br>18<br>9  | 4.<br>39<br>06<br>5 | 4.<br>13<br>86<br>7  | 5.<br>81<br>63<br>5 | 6.<br>06<br>93<br>1 | 5.<br>44<br>85      | 2.2<br>257<br>887<br>41  | 1.1<br>543<br>166<br>67  | 2.2<br>25<br>78<br>87<br>41 | U<br>p           | 0.0<br>14<br>12<br>78<br>99 | 0.3<br>46<br>27<br>53<br>47 |
| 30<br>26       | HABP<br>2    | Hyaluronan<br>binding protein 2                              | 10<br>.7<br>40<br>64 | 9.<br>92<br>83<br>2 | 10<br>.2<br>24<br>09 | 8.<br>55<br>85<br>4 | 7.<br>48<br>27<br>2 | 6.<br>32<br>54<br>8 | -7.<br>170<br>647<br>177 | -2.<br>842<br>103<br>333 | 7.1<br>70<br>64<br>71<br>77 | D<br>o<br>w<br>n | 0.0<br>01<br>39<br>54<br>64 | 0.1<br>87<br>10<br>78<br>18 |
| 10<br>27<br>2  | FSTL3        | Follistatin-like 3<br>(secreted<br>glycoprotein)             | 5.<br>89<br>82<br>6  | 5.<br>97<br>11<br>5 | 5.<br>91<br>04<br>9  | 6.<br>82<br>93<br>7 | 7.<br>05<br>38<br>7 | 6.<br>96<br>14<br>6 | 2.0<br>301<br>692<br>41  | 1.0<br>216               | 2.0<br>30<br>16<br>92<br>41 | U<br>p           | 0.0<br>01<br>10<br>37<br>78 | 0.1<br>86<br>14<br>79<br>2  |
| 11<br>68       | LRG1         | Leucine-rich<br>$\alpha$ -2-glycoprotein 1                   | 6.<br>51             | 6.<br>70            | 6.<br>75             | 5.<br>76            | 5.<br>45            | 5.<br>67            | -2.<br>038               | -1.<br>027               | 2.0<br>38                   | D<br>o           | 0.0<br>01                   | 0.1<br>87                   |



|                           |                      |                                               |                     |                      |                      |                     |                     |                     |                          |                          |                             |                  |                             |                             |
|---------------------------|----------------------|-----------------------------------------------|---------------------|----------------------|----------------------|---------------------|---------------------|---------------------|--------------------------|--------------------------|-----------------------------|------------------|-----------------------------|-----------------------------|
| 44                        |                      |                                               | 20<br>5             | 77<br>8              | 99<br>4              | 41                  | 49<br>5             | 85<br>9             | 314<br>498               | 376<br>667               | 31<br>44<br>98              | w<br>n           | 53<br>21<br>52              | 10<br>78<br>18              |
| 10<br>09<br>96<br>76<br>3 | LOC10<br>099676<br>3 | Notch homolog 2<br>N-terminal-like<br>protein | 7.<br>77<br>63      | 7.<br>35<br>32       | 7.<br>50<br>59<br>9  | 9.<br>02<br>15      | 8.<br>39<br>94<br>5 | 8.<br>23<br>79<br>8 | 2.0<br>108<br>702<br>56  | 1.0<br>078<br>2          | 2.0<br>10<br>87<br>02<br>56 | U<br>p           | 0.0<br>08<br>35<br>33<br>07 | 0.3<br>04<br>72<br>02<br>15 |
| 72<br>94<br>38            | GATS<br>L2           | GATS protein-like<br>2                        | 7.<br>97<br>02<br>4 | 9.<br>17<br>10<br>3  | 8.<br>95<br>57<br>7  | 6.<br>38<br>30<br>4 | 6.<br>40<br>33<br>9 | 7.<br>40<br>57<br>7 | -3.<br>913<br>013<br>262 | -1.<br>968<br>28         | 3.9<br>13<br>01<br>32<br>62 | D<br>o<br>w<br>n | 0.0<br>02<br>40<br>38<br>09 | 0.2<br>15<br>53<br>16<br>8  |
| 79<br>96<br>6             | SCD5                 | Stearoyl-coa<br>desaturase 5                  | 5.<br>58<br>98<br>1 | 4.<br>63<br>45<br>8  | 4.<br>78<br>14<br>2  | 4.<br>03<br>94<br>5 | 3.<br>62<br>74<br>2 | 3.<br>78<br>07      | -2.<br>275<br>336<br>624 | -1.<br>186<br>08         | 2.2<br>75<br>33<br>66<br>24 | D<br>o<br>w<br>n | 0.0<br>04<br>64<br>62<br>52 | 0.2<br>55<br>30<br>86<br>17 |
| 79<br>77<br>0             | TXND<br>C15          | Thioredoxin<br>domain containing<br>15        | 5.<br>27<br>41<br>5 | 5.<br>68<br>26<br>8  | 5.<br>57<br>24<br>5  | 4.<br>14<br>02<br>5 | 4.<br>92<br>85<br>2 | 4.<br>42<br>42<br>1 | -2.<br>016<br>844<br>702 | -1.<br>012<br>1          | 2.0<br>16<br>84<br>47<br>02 | D<br>o<br>w<br>n | 0.0<br>06<br>04<br>71<br>85 | 0.2<br>79<br>48<br>17<br>42 |
| 16<br>33                  | DCK                  | Deoxycytidine<br>kinase                       | 6.<br>37<br>2       | 5.<br>80<br>81<br>4  | 5.<br>69<br>77<br>7  | 7.<br>05<br>71<br>9 | 7.<br>87<br>94<br>3 | 6.<br>15<br>47      | 2.1<br>010<br>881<br>15  | 1.0<br>711<br>366<br>67  | 2.1<br>01<br>08<br>81<br>15 | U<br>p           | 0.0<br>49<br>06<br>80<br>58 | 0.4<br>46<br>17<br>48       |
| 84<br>92                  | PRSS1<br>2           | Protease, serine 12                           | 6.<br>73<br>73<br>8 | 5.<br>33<br>66<br>1  | 5.<br>71<br>59<br>3  | 8.<br>09<br>06      | 7.<br>01<br>66      | 7.<br>06<br>25<br>8 | 2.7<br>509<br>946<br>49  | 1.4<br>599<br>533<br>33  | 2.7<br>50<br>99<br>46<br>49 | U<br>p           | 0.0<br>14<br>90<br>95<br>23 | 0.3<br>48<br>11<br>05<br>43 |
| 85<br>40<br>7             | NKD1                 | Naked cuticle<br>homolog 1<br>(Drosophila)    | 4.<br>89<br>12<br>6 | 11<br>.4<br>66<br>59 | 10<br>.5<br>18<br>27 | 3.<br>79<br>95<br>3 | 5.<br>05<br>58<br>1 | 4.<br>66<br>50<br>8 | -21<br>.88<br>544<br>783 | -4.<br>451<br>9          | 21.<br>88<br>54<br>47<br>83 | D<br>o<br>w<br>n | 0.0<br>27<br>12<br>96<br>35 | 0.3<br>89<br>53<br>60<br>92 |
| 12<br>77<br>00            | OSCP1                | Organic solute<br>carrier partner 1           | 7.<br>02<br>22<br>3 | 7.<br>64<br>06<br>3  | 7.<br>06<br>68<br>9  | 6.<br>95<br>84<br>3 | 5.<br>33<br>26<br>7 | 6.<br>02<br>00<br>7 | -2.<br>203<br>087<br>303 | -1.<br>139<br>526<br>667 | 2.2<br>03<br>08<br>73<br>03 | D<br>o<br>w<br>n | 0.0<br>33<br>28<br>19<br>77 | 0.4<br>06<br>85<br>22<br>16 |
| 63                        | ZNF66                | Zinc finger protein                           | 5.                  | 5.                   | 5.                   | 3.                  | 4.                  | 3.                  | -3.                      | -1.                      | 3.0                         | D                | 0.0                         | 0.1                         |

|           |                 |                                           |         |          |         |         |          |         |              |              |             |                  |             |             |
|-----------|-----------------|-------------------------------------------|---------|----------|---------|---------|----------|---------|--------------|--------------|-------------|------------------|-------------|-------------|
| 934       | 7               | 667                                       | 33531   | 54991    | 89724   | 99058   | 41537    | 55571   | 046036719    | 606933333    | 46036719    | o<br>w<br>n      | 00717261    | 72631847    |
| 23235     | SIK2            | Salt inducible kinase 2                   | 6.50828 | 7.33998  | 7.48124 | 5.54541 | 5.96244  | 5.65908 | -2.616291577 | -1.387523333 | 2.616291577 | D<br>o<br>w<br>n | 0.002931973 | 0.23133569  |
| 10750     | GRAP            | GRB2-related adaptor protein              | 5.31815 | 7.64792  | 6.6155  | 4.71043 | 4.87504  | 5.41042 | -2.884644099 | -1.528393333 | 2.884644099 | D<br>o<br>w<br>n | 0.030863593 | 0.39930908  |
| 57178     | ZMIZ1           | Zinc finger, MIZ-type containing 1        | 9.72634 | 9.958267 | 9.22641 | 7.89069 | 8.92614  | 8.0338  | -2.342847961 | -1.228263333 | 2.342847961 | D<br>o<br>w<br>n | 0.007388522 | 0.292725141 |
| 8351      | HIST1H3D        | Histone cluster 1, h3d                    | 9.22005 | 8.79403  | 8.36354 | 9.99628 | 10.56551 | 9.57937 | 2.385866522  | 1.2545133    | 2.385866522 | U<br>p           | 0.0083968   | 0.29913954  |
| 6713      | SQLE            | Squalene epoxidase                        | 4.416   | 3.8798   | 3.97748 | 4.46678 | 6.83518  | 6.26083 | 2.983673     | 1.5770933    | 2.983673    | U<br>p           | 0.040341982 | 0.42539913  |
| 100861540 | CYP3A7-CYP3A51P | CYP3A7-CYP3A51P readthrough               | 7.71903 | 5.12613  | 6.91826 | 4.31608 | 5.09119  | 4.2622  | -4.08777486  | -2.031316667 | 4.08777486  | D<br>o<br>w<br>n | 0.016021561 | 0.351799596 |
| 105369239 | LOC105369239    | Multidrug resistance-associated protein 6 | 5.3415  | 6.2323   | 6.4721  | 5.36392 | 4.50681  | 4.96884 | -2.097658754 | -1.06878     | 2.097658754 | D<br>o<br>w<br>n | 0.022821648 | 0.37991168  |
| 27101     | CACYBP          | Calcyclin binding protein                 | 4.79634 | 4.56144  | 4.55199 | 6.28904 | 5.55717  | 5.14704 | 2.038950381  | 1.027826667  | 2.038950381 | U<br>p           | 0.013371081 | 0.340991946 |

|                |             |                                                             |         |          |          |          |         |           |              |              |             |                  |             |              |
|----------------|-------------|-------------------------------------------------------------|---------|----------|----------|----------|---------|-----------|--------------|--------------|-------------|------------------|-------------|--------------|
| 46<br>64       | NAB1        | NGFI-A binding protein 1                                    | 4.87248 | 5.06991  | 4.66897  | 6.85309  | 6.24502 | 6.69592   | 3.311649527  | 1.72755      | 3.311649527 | U<br>p           | 0.0020352   | 0.135279577  |
| 14<br>05<br>76 | S100A16     | S100 calcium binding protein A16                            | 6.96775 | 7.73201  | 8.22864  | 10.31010 | 8.34795 | 8.81696   | 2.85941496   | 1.51572      | 2.85941496  | U<br>p           | 0.030767835 | 0.3993030908 |
| 83<br>60       | HIST1H4D    | Histone cluster 1, h4d                                      | 7.65378 | 7.98614  | 7.65173  | 5.99022  | 6.61451 | 7.46241   | -2.106483575 | -1.074836667 | 2.106483575 | D<br>o<br>w<br>n | 0.02649972  | 0.38770253   |
| 14<br>74<br>95 | APCD<br>D1  | Adenomatosis coli down-regulated 1                          | 8.85567 | 11.63766 | 11.49824 | 9.53851  | 6.6787  | 6.6634    | -8.207749307 | -3.036986667 | 8.207749307 | D<br>o<br>w<br>n | 0.020573706 | 0.371592873  |
| 98<br>24       | ARHGAP11A   | Rho gtpase activating protein 11A                           | 5.86996 | 5.53957  | 6.22912  | 7.63448  | 7.95977 | 7.54286   | 3.562327116  | 1.83282      | 3.562327116 | U<br>p           | 0.001919565 | 0.135279577  |
| 84<br>25       | LTBP4       | Latent transforming growth factor $\beta$ binding protein 4 | 7.66525 | 8.67901  | 7.86268  | 8.85586  | 9.35212 | 11.076752 | 3.225493702  | 1.68952      | 3.225493702 | U<br>p           | 0.024620516 | 0.383131863  |
| 26<br>69       | GEM         | GTP binding protein overexpressed in skeletal muscle        | 4.95819 | 3.96836  | 4.20874  | 5.63005  | 8.21783 | 6.41597   | 5.191626756  | 2.3761867    | 5.191626756 | U<br>p           | 0.008198793 | 0.301902594  |
| 97<br>71       | RAPG<br>EF5 | Rap guanine nucleotide exchange factor 5                    | 4.96094 | 3.80846  | 5.05812  | 6.25004  | 6.41009 | 5.01314   | 2.431618707  | 1.2819667    | 2.431618707 | U<br>p           | 0.033544312 | 0.407707499  |
| 54<br>43<br>4  | SSH1        | Slingshot protein phosphatase 1                             | 8.766   | 7.50142  | 7.58159  | 6.03648  | 7.50936 | 6.482     | -2.417847635 | -1.273723333 | 2.417847635 | D<br>o<br>w<br>n | 0.0359116   | 0.4124733    |

|                |              |                                                             |                     |                     |                     |                     |                     |                     |                          |                          |                             |                  |                             |                             |    |
|----------------|--------------|-------------------------------------------------------------|---------------------|---------------------|---------------------|---------------------|---------------------|---------------------|--------------------------|--------------------------|-----------------------------|------------------|-----------------------------|-----------------------------|----|
|                |              |                                                             |                     |                     |                     |                     |                     |                     |                          |                          |                             | 35               |                             | 34                          | 32 |
| 84<br>70<br>6  | GPT2         | Glutamic pyruvate transaminase (alanine aminotransferase) 2 | 6.<br>51<br>05<br>2 | 9.<br>87<br>22<br>1 | 9.<br>02<br>47<br>6 | 6.<br>11<br>57<br>3 | 4.<br>83<br>45<br>5 | 5.<br>19<br>75<br>9 | -8.<br>494<br>564<br>588 | -3.<br>086<br>54         | 8.4<br>94<br>56<br>45<br>88 | D<br>o<br>w<br>n | 0.0<br>08<br>07<br>07       | 0.2<br>99<br>13<br>95<br>54 |    |
| 50<br>61<br>9  | DEF6         | DEF6, guanine nucleotide exchange factor                    | 6.<br>27<br>09<br>6 | 6.<br>50<br>70<br>7 | 6.<br>15<br>07<br>3 | 4.<br>40<br>53<br>1 | 4.<br>93<br>58<br>6 | 5.<br>84<br>71<br>7 | -2.<br>373<br>155<br>551 | -1.<br>246<br>806<br>667 | 2.3<br>73<br>15<br>55<br>51 | D<br>o<br>w<br>n | 0.0<br>12<br>84<br>09<br>59 | 0.3<br>36<br>17<br>41<br>55 |    |
| 60<br>5        | BCL7<br>A    | B-cell CLL/lymphoma 7A                                      | 5.<br>97<br>66<br>7 | 6.<br>01<br>11      | 6.<br>53<br>41<br>1 | 4.<br>97<br>09<br>9 | 5.<br>08<br>95<br>5 | 5.<br>29<br>21<br>2 | -2.<br>079<br>745<br>026 | -1.<br>056<br>406<br>667 | 2.0<br>79<br>74<br>50<br>26 | D<br>o<br>w<br>n | 0.0<br>02<br>93<br>13<br>58 | 0.2<br>31<br>33<br>53<br>69 |    |
| 22<br>09<br>88 | HNRN<br>PA3  | Heterogeneous nuclear ribonucleoprotein A3                  | 4.<br>83<br>45<br>5 | 5.<br>94<br>42<br>2 | 5.<br>36<br>27<br>9 | 6.<br>76<br>65<br>7 | 6.<br>84<br>22<br>7 | 6.<br>02<br>83<br>7 | 2.2<br>426<br>326<br>68  | 1.1<br>651<br>933<br>33  | 2.2<br>42<br>63<br>26<br>68 | U<br>p           | 0.0<br>14<br>86<br>12<br>33 | 0.3<br>47<br>51<br>10<br>24 |    |
| 17<br>18       | DHCR<br>24   | 24-dehydrocholesterol reductase                             | 9.<br>81<br>52<br>2 | 9.<br>26<br>90<br>6 | 8.<br>23<br>1       | 6.<br>06<br>17<br>7 | 7.<br>65<br>65<br>2 | 7.<br>89<br>38<br>8 | -3.<br>734<br>814<br>7   | -1.<br>901<br>036<br>667 | 3.7<br>34<br>81<br>47       | D<br>o<br>w<br>n | 0.0<br>15<br>00<br>46<br>88 | 0.3<br>48<br>11<br>05<br>43 |    |
| 63<br>97       | SEC14<br>L1  | SEC14-like lipid binding 1                                  | 8.<br>03<br>08      | 8.<br>27<br>44<br>8 | 8.<br>52<br>92<br>5 | 6.<br>81<br>47<br>5 | 7.<br>32<br>86<br>5 | 7.<br>54<br>71<br>3 | -2.<br>067<br>661<br>472 | -1.<br>048               | 2.0<br>67<br>66<br>14<br>72 | D<br>o<br>w<br>n | 0.0<br>06<br>33<br>07<br>06 | 0.2<br>83<br>73<br>24<br>96 |    |
| 27<br>18<br>5  | DISC1        | Disrupted in schizophrenia 1                                | 6.<br>23<br>02<br>8 | 6.<br>25<br>33<br>7 | 6.<br>36<br>51<br>7 | 4.<br>51<br>18<br>1 | 5.<br>37<br>2<br>7  | 5.<br>70<br>05<br>7 | -2.<br>126<br>007<br>471 | -1.<br>088<br>146<br>667 | 2.1<br>26<br>00<br>74<br>71 | D<br>o<br>w<br>n | 0.0<br>12<br>45<br>04<br>84 | 0.3<br>34<br>46<br>67<br>31 |    |
| 16<br>74       | DES          | Desmin                                                      | 5.<br>44<br>54<br>6 | 5.<br>38<br>84      | 5.<br>31<br>40<br>1 | 5.<br>46<br>76<br>8 | 6.<br>87<br>70<br>7 | 7.<br>94<br>06<br>2 | 2.6<br>011<br>807<br>76  | 1.3<br>791<br>666<br>67  | 2.6<br>01<br>18<br>07<br>76 | U<br>p           | 0.0<br>47<br>74<br>37<br>69 | 0.4<br>43<br>31<br>90<br>56 |    |
| 83<br>57       | HIST1<br>H3H | Histone cluster 1, h3h                                      | 4.<br>25<br>32      | 4.<br>04<br>44      | 3.<br>99<br>06      | 5.<br>69<br>79      | 4.<br>62<br>95      | 5.<br>20<br>44      | 2.1<br>158<br>196        | 1.0<br>812<br>166        | 2.1<br>15<br>81             | U<br>p           | 0.0<br>07<br>60             | 0.2<br>96<br>36             |    |

|                |              |                                                                                                           |                     |                     |                     |                     |                      |                     |                          |                               |                             |                  |                             |                             |
|----------------|--------------|-----------------------------------------------------------------------------------------------------------|---------------------|---------------------|---------------------|---------------------|----------------------|---------------------|--------------------------|-------------------------------|-----------------------------|------------------|-----------------------------|-----------------------------|
|                |              |                                                                                                           | 3                   | 3                   | 2                   | 8                   | 5                    |                     | 61                       | 67                            | 96                          |                  | 09                          | 89                          |
| 29<br>84<br>2  | TFCP2<br>L1  | Transcription<br>factor CP2-like 1                                                                        | 4.<br>42<br>86<br>4 | 5.<br>01<br>91<br>6 | 5.<br>76<br>84<br>5 | 7.<br>50<br>12<br>7 | 5.<br>94<br>81<br>1  | 6.<br>57<br>35<br>7 | 3.0<br>361<br>295<br>13  | 1.6<br>022<br>333<br>33       | 3.0<br>36<br>12<br>95<br>13 | U<br>p           | 0.0<br>13<br>43<br>94<br>45 | 0.3<br>41<br>83<br>96<br>28 |
| 37<br>76<br>77 | CA13         | Carbonic<br>anhydrase XIII                                                                                | 5.<br>57<br>77      | 6.<br>02<br>46<br>7 | 5.<br>73<br>38      | 3.<br>55<br>16<br>1 | 5.<br>31<br>09<br>6  | 3.<br>72<br>25<br>2 | -2.<br>997<br>362<br>001 | -1.<br>583<br>693<br>333      | 2.9<br>97<br>36<br>20<br>01 | D<br>o<br>w<br>n | 0.0<br>11<br>88<br>06<br>86 | 0.3<br>30<br>28<br>63<br>88 |
| 40<br>72       | EPCA<br>M    | Epithelial cell<br>adhesion molecule                                                                      | 8.<br>43<br>97<br>4 | 8.<br>74<br>80<br>2 | 9.<br>25<br>05<br>4 | 9.<br>14<br>14<br>5 | 10<br>.9<br>84<br>56 | 9.<br>76<br>71<br>6 | 2.2<br>216<br>373<br>44  | 1.1<br>516<br>233<br>33<br>44 | 2.2<br>21<br>63<br>73<br>44 | U<br>p           | 0.0<br>49<br>73<br>96<br>3  | 0.4<br>46<br>17<br>48       |
| 10<br>14<br>9  | ADGR<br>G2   | Adhesion G<br>protein-coupled<br>receptor G2                                                              | 4.<br>11<br>28<br>7 | 7.<br>69<br>34<br>7 | 7.<br>75<br>23<br>1 | 4.<br>09<br>03<br>5 | 4.<br>07<br>12<br>1  | 4.<br>34<br>55<br>6 | -5.<br>100<br>045<br>082 | -2.<br>350<br>51              | 5.1<br>00<br>04<br>50<br>82 | D<br>o<br>w<br>n | 0.0<br>40<br>18<br>24<br>97 | 0.4<br>25<br>03<br>95<br>42 |
| 27<br>73       | GNAI3        | Guanine<br>nucleotide binding<br>protein (G<br>protein), $\alpha$<br>inhibiting activity<br>polypeptide 3 | 4.<br>13<br>84<br>1 | 4.<br>55<br>37<br>1 | 3.<br>95<br>43<br>5 | 6.<br>14<br>07<br>2 | 5.<br>27<br>97<br>3  | 4.<br>88<br>15<br>6 | 2.3<br>270<br>679<br>43  | 1.2<br>185<br>133<br>33       | 2.3<br>27<br>06<br>79<br>43 | U<br>p           | 0.0<br>10<br>88<br>84<br>5  | 0.3<br>23<br>87<br>84<br>16 |
| 83<br>58       | HIST1<br>H3B | Histone cluster 1,<br>h3b                                                                                 | 8.<br>86<br>40<br>8 | 6.<br>97<br>94<br>4 | 7.<br>71<br>11<br>7 | 9.<br>55<br>91<br>5 | 10<br>.5<br>31<br>74 | 9.<br>20<br>25<br>9 | 3.7<br>657<br>311<br>39  | 1.9<br>129<br>3<br>11<br>39   | 3.7<br>65<br>73<br>11<br>39 | U<br>p           | 0.0<br>10<br>19<br>49<br>03 | 0.3<br>18<br>26<br>13<br>04 |
| 55<br>26<br>8  | ECHD<br>C2   | Enoyl-coa<br>hydratase domain<br>containing 2                                                             | 8.<br>04<br>90<br>6 | 8.<br>01<br>14<br>4 | 7.<br>95<br>93      | 6.<br>34<br>47<br>6 | 6.<br>86<br>28<br>4  | 7.<br>27<br>99<br>3 | -2.<br>261<br>724<br>7   | -1.<br>177<br>423<br>333      | 2.2<br>61<br>72<br>47       | D<br>o<br>w<br>n | 0.0<br>03<br>92<br>28<br>09 | 0.2<br>40<br>20<br>47<br>61 |
| 47<br>73       | NFAT<br>C2   | Nuclear factor of<br>activated T-cells,<br>cytoplasmic,<br>calcineurin-depend<br>ent 2                    | 6.<br>86<br>48<br>9 | 6.<br>23<br>22<br>3 | 7.<br>11<br>96<br>7 | 3.<br>62<br>03<br>3 | 5.<br>87<br>14<br>8  | 5.<br>67<br>45<br>8 | -3.<br>211<br>988<br>364 | -1.<br>683<br>466<br>667      | 3.2<br>11<br>98<br>83<br>64 | D<br>o<br>w<br>n | 0.0<br>28<br>33<br>83<br>84 | 0.3<br>93<br>27<br>26<br>69 |
| 41             | MCM4         | Minichromosome                                                                                            | 6.                  | 6.                  | 6.                  | 9.                  | 9.                   | 7.                  | 3.6                      | 1.8                           | 3.6                         | U                | 0.0                         | 0.3                         |

|                           |                      |                                                           |                     |                     |                     |                      |                     |                     |                          |                          |                             |                  |                             |                             |
|---------------------------|----------------------|-----------------------------------------------------------|---------------------|---------------------|---------------------|----------------------|---------------------|---------------------|--------------------------|--------------------------|-----------------------------|------------------|-----------------------------|-----------------------------|
| 73                        |                      | maintenance complex component 4                           | 86<br>21<br>9       | 40<br>18<br>7       | 95<br>20<br>9       | 29<br>34<br>8        | 41<br>68<br>3       | 12<br>20<br>9       | 606<br>081<br>11         | 720<br>833<br>33         | 60<br>60<br>81<br>11        | p                | 18<br>28<br>40<br>69        | 64<br>08<br>78<br>05        |
| 98<br>43                  | HEPH                 | Hephaestin                                                | 8.<br>03<br>81<br>7 | 4.<br>40<br>59<br>6 | 4.<br>46<br>66<br>9 | 8.<br>76<br>92<br>7  | 9.<br>77<br>40<br>1 | 8.<br>77<br>34<br>1 | 11.<br>070<br>307<br>06  | 3.4<br>686<br>233<br>33  | 11.<br>07<br>03<br>07<br>06 | U<br>p           | 0.0<br>08<br>94<br>74<br>95 | 0.3<br>09<br>08<br>01<br>85 |
| 57<br>64<br>4             | MYH7<br>B            | Myosin, heavy chain 7B, cardiac muscle, $\beta$           | 5.<br>56<br>16<br>7 | 8.<br>75<br>73<br>2 | 8.<br>48<br>93<br>5 | 5.<br>31<br>56<br>5  | 5.<br>27<br>71<br>6 | 6.<br>10<br>05<br>9 | -4.<br>107<br>602<br>757 | -2.<br>038<br>296<br>667 | 4.1<br>07<br>60<br>27<br>57 | D<br>o<br>w<br>n | 0.0<br>43<br>05<br>16<br>58 | 0.4<br>32<br>07<br>88<br>1  |
| 51<br>51<br>2             | GTSE1                | G-2 and S-phase expressed 1                               | 5.<br>14<br>10<br>7 | 4.<br>32<br>67<br>7 | 4.<br>89<br>51<br>1 | 6.<br>82<br>90<br>5  | 7.<br>42<br>01<br>1 | 5.<br>67<br>67<br>6 | 3.6<br>157<br>710<br>6   | 1.8<br>543<br>033<br>33  | 3.6<br>15<br>77<br>10<br>6  | U<br>p           | 0.0<br>05<br>41<br>34<br>57 | 0.2<br>69<br>32<br>15<br>26 |
| 46<br>40                  | MYO1<br>A            | Myosin IA                                                 | 5.<br>13<br>63<br>7 | 5.<br>34<br>16      | 6.<br>48<br>04<br>9 | 7.<br>35<br>50<br>3  | 8.<br>16<br>94<br>7 | 7.<br>10<br>54<br>1 | 3.7<br>075<br>941<br>62  | 1.8<br>904<br>833<br>33  | 3.7<br>07<br>59<br>41<br>62 | U<br>p           | 0.0<br>03<br>70<br>37<br>63 | 0.2<br>38<br>59<br>85<br>3  |
| 31<br>58                  | HMGC<br>S2           | 3-hydroxy-3-methylglutaryl-coa synthase 2 (mitochondrial) | 4.<br>38<br>25<br>4 | 5.<br>13<br>27<br>5 | 7.<br>18<br>02<br>1 | 10<br>.4<br>25<br>89 | 8.<br>91<br>72<br>7 | 7.<br>62<br>71<br>5 | 10.<br>740<br>108<br>53  | 3.4<br>249<br>366<br>67  | 10.<br>74<br>01<br>08<br>53 | U<br>p           | 0.0<br>06<br>90<br>08<br>44 | 0.2<br>88<br>45<br>97<br>19 |
| 11<br>32<br>35            | SLC46<br>A1          | Solute carrier family 46 (folate transporter), member 1   | 8.<br>47<br>51<br>9 | 8.<br>01<br>13<br>1 | 7.<br>42<br>24<br>8 | 6.<br>38<br>53<br>4  | 6.<br>69<br>89<br>9 | 6.<br>71<br>01<br>5 | -2.<br>587<br>394<br>431 | -1.<br>371<br>5<br>44    | 2.5<br>87<br>39<br>44<br>31 | D<br>o<br>w<br>n | 0.0<br>03<br>00<br>28<br>9  | 0.2<br>33<br>70<br>50<br>09 |
| 10<br>05<br>29<br>85<br>5 | ZNF62<br>5-ZNF<br>20 | ZNF625-ZNF20 readthrough (NMD candidate)                  | 7.<br>08<br>67<br>1 | 7.<br>47<br>19<br>2 | 7.<br>41<br>44<br>2 | 4.<br>66<br>41<br>3  | 6.<br>17<br>38<br>7 | 5.<br>85<br>55<br>3 | -3.<br>386<br>605<br>642 | -1.<br>759<br>84<br>60   | 3.3<br>86<br>60<br>56<br>42 | D<br>o<br>w<br>n | 0.0<br>03<br>44<br>84<br>71 | 0.2<br>37<br>14<br>66<br>6  |
| 44<br>06<br>72            | NUDT<br>4P1          | Nudix hydrolase 4 pseudogene 1                            | 5.<br>90<br>68<br>7 | 4.<br>50<br>84<br>1 | 5.<br>12<br>77      | 3.<br>52<br>15<br>6  | 4.<br>35<br>53<br>6 | 3.<br>47<br>68<br>2 | -2.<br>632<br>463<br>145 | -1.<br>396<br>413<br>333 | 2.6<br>32<br>46<br>31<br>45 | D<br>o<br>w<br>n | 0.0<br>11<br>24<br>71<br>44 | 0.3<br>24<br>85<br>44<br>65 |

|                |              |                                                        |                     |                     |                     |                      |                     |                      |                          |                          |                             |                  |                             |                             |
|----------------|--------------|--------------------------------------------------------|---------------------|---------------------|---------------------|----------------------|---------------------|----------------------|--------------------------|--------------------------|-----------------------------|------------------|-----------------------------|-----------------------------|
| 51<br>04<br>6  | ST8SI<br>A3  | ST8<br>$\alpha$ -N-acetyl-neuraminidase 3              | 7.<br>23<br>55<br>1 | 5.<br>33<br>88<br>6 | 7.<br>21<br>91<br>1 | 5.<br>17<br>11<br>4  | 5.<br>43<br>40<br>9 | 5.<br>22<br>93<br>3  | -2.<br>496<br>038<br>176 | -1.<br>319<br>64         | 2.4<br>96<br>03<br>81<br>76 | D<br>o<br>w<br>n | 0.0<br>37<br>70<br>38<br>01 | 0.4<br>17<br>31<br>42<br>37 |
| 27<br>19       | GPC3         | Glypican 3                                             | 3.<br>99<br>90<br>2 | 3.<br>67<br>91<br>7 | 3.<br>78<br>37<br>2 | 4.<br>41<br>98       | 5.<br>84<br>26<br>8 | 5.<br>53<br>42<br>3  | 2.7<br>225<br>024<br>24  | 1.4<br>449<br>333<br>33  | 2.7<br>22<br>50<br>24<br>24 | U<br>p           | 0.0<br>06<br>10<br>37<br>88 | 0.2<br>79<br>48<br>17<br>42 |
| 84<br>28<br>8  | EFCA<br>B2   | EF-hand calcium binding domain 2                       | 4.<br>42<br>15<br>4 | 5.<br>00<br>31<br>5 | 4.<br>79<br>08<br>1 | 4.<br>23<br>52<br>1  | 2.<br>98<br>80<br>3 | 3.<br>83<br>50<br>6  | -2.<br>073<br>977<br>151 | -1.<br>052<br>4          | 2.0<br>73<br>97<br>71<br>51 | D<br>o<br>w<br>n | 0.0<br>18<br>32<br>58<br>56 | 0.3<br>64<br>36<br>27<br>9  |
| 29<br>82       | GUCY<br>1A3  | Guanylate cyclase 1, soluble, $\alpha$ 3               | 6.<br>76<br>76<br>4 | 3.<br>42<br>44<br>6 | 3.<br>83<br>26<br>9 | 8.<br>43<br>63<br>5  | 7.<br>61<br>80<br>8 | 6.<br>41<br>79<br>2  | 7.0<br>413<br>562<br>37  | 2.8<br>158<br>533<br>33  | 7.0<br>41<br>35<br>62<br>37 | U<br>p           | 0.0<br>19<br>70<br>82<br>61 | 0.3<br>67<br>76<br>00<br>84 |
| 64<br>28<br>3  | ARHG<br>EF28 | Rho guanine nucleotide exchange factor 28              | 5.<br>94<br>80<br>5 | 7.<br>19<br>21<br>3 | 7.<br>31<br>71<br>8 | 3.<br>86<br>08<br>8  | 4.<br>87<br>52      | 6.<br>49<br>05<br>4  | -3.<br>348<br>650<br>943 | -1.<br>743<br>58         | 3.3<br>48<br>65<br>09<br>43 | D<br>o<br>w<br>n | 0.0<br>40<br>53<br>74<br>25 | 0.4<br>26<br>13<br>61<br>58 |
| 28<br>96<br>0  | DCPS         | Decapping enzyme, scavenger                            | 7.<br>62<br>67<br>3 | 7.<br>28<br>49<br>1 | 7.<br>53<br>92<br>4 | 6.<br>29<br>98<br>1  | 6.<br>56<br>75<br>5 | 6.<br>39<br>40<br>8  | -2.<br>089<br>483<br>935 | -1.<br>063<br>146<br>667 | 2.0<br>89<br>48<br>39<br>35 | D<br>o<br>w<br>n | 0.0<br>01<br>47<br>89<br>75 | 0.1<br>87<br>10<br>78<br>18 |
| 62<br>77       | S100A<br>6   | S100 calcium binding protein A6                        | 9.<br>88<br>45<br>8 | 8.<br>66<br>15<br>1 | 9.<br>52<br>00<br>2 | 11<br>.2<br>36<br>62 | 9.<br>99<br>54<br>8 | 10<br>.6<br>53<br>51 | 2.4<br>169<br>148<br>84  | 1.2<br>731<br>666<br>67  | 2.4<br>16<br>91<br>48<br>84 | U<br>p           | 0.0<br>21<br>10<br>33<br>33 | 0.3<br>72<br>54<br>06<br>54 |
| 65<br>35<br>90 | GGTL<br>C5P  | $\Gamma$ -glutamyltransferase light chain 5 pseudogene | 9.<br>16<br>15<br>7 | 9.<br>31<br>31<br>4 | 8.<br>59<br>69<br>8 | 7.<br>48<br>88<br>1  | 7.<br>56<br>93<br>1 | 5.<br>95<br>58<br>1  | -4.<br>053<br>739<br>364 | -2.<br>019<br>253<br>333 | 4.0<br>53<br>73<br>93<br>64 | D<br>o<br>w<br>n | 0.0<br>03<br>67<br>15<br>27 | 0.2<br>38<br>59<br>85<br>3  |
| 72<br>82<br>39 | MAGE<br>D4   | Melanoma antigen family D4                             | 6.<br>73<br>66<br>1 | 7.<br>78<br>26<br>7 | 7.<br>88<br>61<br>3 | 5.<br>55<br>04       | 5.<br>72<br>10<br>3 | 6.<br>69<br>70<br>9  | -2.<br>787<br>483<br>631 | -1.<br>478<br>963<br>333 | 2.7<br>87<br>48<br>36       | D<br>o<br>w<br>n | 0.0<br>11<br>09<br>69       | 0.3<br>24<br>51<br>13       |

|               |              |                                                                                                       |                     |                     |                     |                     |                     |                     |                          |                          |                             |                  |                             |                             |    |
|---------------|--------------|-------------------------------------------------------------------------------------------------------|---------------------|---------------------|---------------------|---------------------|---------------------|---------------------|--------------------------|--------------------------|-----------------------------|------------------|-----------------------------|-----------------------------|----|
|               |              |                                                                                                       |                     |                     |                     |                     |                     |                     |                          |                          |                             | 31               |                             | 59                          | 09 |
| 57<br>65<br>0 | KIAA1<br>524 | KIAA1524                                                                                              | 4.<br>46<br>56<br>2 | 4.<br>21<br>07<br>4 | 4.<br>24<br>61      | 5.<br>08<br>84<br>7 | 5.<br>14<br>64<br>2 | 5.<br>70<br>72      | 2.0<br>090<br>915<br>88  | 1.0<br>065<br>433<br>33  | 2.0<br>09<br>15<br>88       | U<br>p           | 0.0<br>03<br>36<br>32<br>83 | 0.2<br>37<br>14<br>66<br>6  |    |
| 27<br>35<br>2 | SGSM<br>3    | Small G protein<br>signaling<br>modulator 3                                                           | 7.<br>06<br>51<br>4 | 7.<br>78<br>10<br>1 | 7.<br>73<br>43<br>2 | 6.<br>56<br>21<br>2 | 6.<br>16<br>91<br>6 | 6.<br>78<br>35<br>9 | -2.<br>030<br>544<br>531 | -1.<br>021<br>866<br>667 | 2.0<br>30<br>54<br>45<br>31 | D<br>o<br>w<br>n | 0.0<br>09<br>74<br>27<br>19 | 0.3<br>14<br>09<br>02<br>13 |    |
| 57<br>42      | PTGS1        | Prostaglandin-end<br>operoxide<br>synthase 1<br>(prostaglandin<br>G/H synthase and<br>cyclooxygenase) | 6.<br>85<br>58<br>3 | 5.<br>51<br>65<br>5 | 5.<br>07<br>61<br>5 | 3.<br>34<br>62<br>7 | 5.<br>28<br>65<br>2 | 4.<br>20<br>43<br>5 | -2.<br>902<br>165<br>916 | -1.<br>537<br>13         | 2.9<br>02<br>16<br>59<br>16 | D<br>o<br>w<br>n | 0.0<br>40<br>84<br>01<br>81 | 0.4<br>26<br>34<br>37<br>07 |    |
| 59<br>08      | RAP1<br>B    | RAP1B, member<br>of RAS oncogene<br>family                                                            | 4.<br>52<br>26<br>7 | 4.<br>56<br>51<br>4 | 4.<br>54<br>13<br>6 | 7.<br>70<br>07<br>9 | 5.<br>53<br>31<br>7 | 5.<br>26<br>49<br>3 | 3.0<br>806<br>611<br>39  | 1.6<br>232<br>4          | 3.0<br>80<br>66<br>11<br>39 | U<br>p           | 0.0<br>32<br>96<br>41<br>74 | 0.4<br>05<br>79<br>90<br>71 |    |
| 10<br>94<br>8 | STAR<br>D3   | Star related lipid<br>transfer domain<br>containing 3                                                 | 7.<br>55<br>98<br>9 | 9.<br>30<br>24<br>3 | 9.<br>21<br>66<br>1 | 7.<br>03<br>88<br>8 | 6.<br>58<br>62<br>2 | 7.<br>49<br>60<br>5 | -3.<br>143<br>982<br>818 | -1.<br>652<br>593<br>333 | 3.1<br>43<br>98<br>28<br>18 | D<br>o<br>w<br>n | 0.0<br>14<br>42<br>79<br>05 | 0.3<br>46<br>82<br>70<br>31 |    |
| 92<br>23      | MAGI<br>1    | Membrane<br>associated<br>guanylate kinase,<br>WW and PDZ<br>domain containing<br>1                   | 4.<br>98<br>32<br>4 | 4.<br>63<br>75<br>4 | 5.<br>14<br>65<br>4 | 4.<br>43<br>56<br>7 | 3.<br>11<br>88<br>1 | 3.<br>61<br>42<br>6 | -2.<br>296<br>643<br>082 | -1.<br>199<br>526<br>667 | 2.2<br>96<br>64<br>30<br>82 | D<br>o<br>w<br>n | 0.0<br>11<br>04<br>55<br>9  | 0.3<br>24<br>27<br>76<br>54 |    |
| 10<br>01      | CDH3         | Cadherin 3, type 1,<br>P-cadherin<br>(placental)                                                      | 3.<br>86<br>91<br>9 | 5.<br>95<br>87<br>7 | 5.<br>82<br>14<br>1 | 6.<br>74<br>95<br>2 | 7.<br>15<br>34<br>4 | 7.<br>68<br>20<br>4 | 3.9<br>409<br>496<br>93  | 1.9<br>785<br>433<br>33  | 3.9<br>40<br>94<br>96<br>93 | U<br>p           | 0.0<br>11<br>58<br>57<br>63 | 0.3<br>27<br>65<br>98<br>66 |    |
| 10<br>61<br>3 | ERLIN<br>1   | ER lipid raft<br>associated 1                                                                         | 4.<br>21<br>44<br>7 | 4.<br>06<br>18<br>5 | 4.<br>45<br>56<br>3 | 5.<br>61<br>75<br>8 | 5.<br>86<br>32<br>9 | 4.<br>61<br>54<br>9 | 2.1<br>756<br>854<br>59  | 1.1<br>214<br>7          | 2.1<br>75<br>68<br>54<br>59 | U<br>p           | 0.0<br>14<br>12<br>11<br>9  | 0.3<br>46<br>27<br>53<br>47 |    |
| 10            | LOC10        | Inactive                                                                                              | 9.                  | 9.                  | 8.                  | 7.                  | 7.                  | 5.                  | -4.                      | -2.                      | 4.0                         | D                | 0.0                         | 0.2                         |    |



|                     |             |                                                                                       |                     |                     |                       |                     |                     |                     |                          |                          |                             |                  |                             |                             |
|---------------------|-------------|---------------------------------------------------------------------------------------|---------------------|---------------------|-----------------------|---------------------|---------------------|---------------------|--------------------------|--------------------------|-----------------------------|------------------|-----------------------------|-----------------------------|
| 27<br>24<br>82<br>3 | 272482<br>3 | $\gamma$ -glutamyltranspeptidase 2                                                    | 16<br>15<br>7       | 31<br>31<br>4       | 59<br>69<br>8         | 48<br>88<br>1       | 56<br>93<br>1       | 95<br>58<br>1       | 053<br>739<br>364        | 019<br>253<br>333        | 53<br>73<br>93<br>64        | o<br>w<br>n      | 03<br>67<br>15<br>27        | 38<br>59<br>85<br>3         |
| 11<br>02            | RCBT<br>B2  | Regulator of chromosome condensation (RCC1) and BTB (POZ) domain containing protein 2 | 7.<br>96<br>84<br>6 | 8.<br>48<br>04<br>1 | 7.<br>75<br>52<br>4   | 6.<br>81<br>09<br>2 | 7.<br>10<br>87<br>9 | 6.<br>63<br>19<br>4 | -2.<br>325<br>412<br>518 | -1.<br>217<br>486<br>667 | 2.3<br>25<br>41<br>25<br>18 | D<br>o<br>w<br>n | 0.0<br>02<br>78<br>16<br>9  | 0.2<br>28<br>79<br>54<br>43 |
| 23<br>55            | FOSL2       | FOS-like antigen 2                                                                    | 7.<br>62<br>45<br>2 | 6.<br>64<br>05<br>5 | 7.<br>01<br>25<br>6   | 8.<br>68<br>40<br>3 | 8.<br>76<br>94<br>9 | 8.<br>55<br>55<br>5 | 2.9<br>837<br>913<br>75  | 1.5<br>771<br>466<br>67  | 2.9<br>83<br>79<br>13<br>75 | U<br>p           | 0.0<br>01<br>00<br>73<br>51 | 0.1<br>86<br>14<br>79<br>2  |
| 29<br>12<br>8       | UHRF<br>1   | Ubiquitin-like with PHD and ring finger domains 1                                     | 4.<br>00<br>70<br>2 | 3.<br>76<br>15<br>7 | 3.<br>95<br>70<br>5   | 5.<br>69<br>81<br>2 | 6.<br>28<br>96<br>5 | 3.<br>94<br>24<br>8 | 2.6<br>418<br>282<br>3   | 1.4<br>015<br>366<br>67  | 2.6<br>41<br>82<br>82<br>3  | U<br>p           | 0.0<br>41<br>61<br>87<br>14 | 0.4<br>28<br>45<br>89<br>05 |
| 23<br>64<br>8       | SSBP3       | Single stranded DNA binding protein 3                                                 | 9.<br>69<br>82<br>3 | 9.<br>73<br>00<br>4 | 10.<br>.6<br>25<br>04 | 8.<br>59<br>63<br>6 | 9.<br>71<br>31<br>4 | 8.<br>67<br>38<br>7 | -2.<br>032<br>581<br>687 | -1.<br>023<br>313<br>333 | 2.0<br>32<br>58<br>16<br>87 | D<br>o<br>w<br>n | 0.0<br>38<br>98<br>90<br>01 | 0.4<br>21<br>22<br>82<br>87 |
| 15<br>9             | ADSS        | Adenylosuccinate synthase                                                             | 4.<br>95<br>50<br>3 | 4.<br>25<br>38<br>7 | 4.<br>92<br>61<br>3   | 6.<br>52<br>65<br>7 | 5.<br>78<br>61<br>4 | 5.<br>49<br>48<br>8 | 2.3<br>362<br>370<br>49  | 1.2<br>241<br>866<br>67  | 2.3<br>36<br>23<br>70<br>49 | U<br>p           | 0.0<br>08<br>74<br>35<br>47 | 0.3<br>08<br>52<br>19<br>75 |
| 55<br>26<br>6       | TMEM<br>19  | Transmembrane protein 19                                                              | 5.<br>79<br>59<br>8 | 4.<br>93<br>41<br>1 | 5.<br>26<br>71<br>6   | 7.<br>49<br>14<br>3 | 6.<br>43<br>14<br>6 | 5.<br>72<br>04<br>3 | 2.3<br>219<br>818<br>04  | 1.2<br>153<br>566<br>67  | 2.3<br>21<br>98<br>18<br>04 | U<br>p           | 0.0<br>36<br>77<br>67<br>72 | 0.4<br>14<br>09<br>55<br>77 |
| 11<br>03<br>3       | ADAP<br>1   | Arfgap with dual PH domains 1                                                         | 7.<br>49<br>28<br>2 | 7.<br>00<br>76<br>7 | 7.<br>13<br>73<br>6   | 8.<br>88<br>42<br>8 | 8.<br>01<br>53<br>6 | 8.<br>15<br>68<br>5 | 2.2<br>031<br>178<br>44  | 1.1<br>395<br>466<br>67  | 2.2<br>03<br>11<br>78<br>44 | U<br>p           | 0.0<br>06<br>58<br>00<br>13 | 0.2<br>86<br>61<br>99<br>1  |
| 27<br>52            | GLUL        | Glutamate-ammonia ligase                                                              | 11<br>.1<br>46      | 12<br>.6<br>29      | 12<br>.2<br>70        | 8.<br>58<br>72      | 10<br>.9<br>25      | 10<br>.4<br>65      | -4.<br>063<br>998        | -2.<br>022<br>9          | 4.0<br>63<br>99             | D<br>o<br>w      | 0.0<br>19<br>13             | 0.3<br>67<br>66             |

|    |       |                                   |         |         |         |         |         |         |           |           |          |   |           |           |
|----|-------|-----------------------------------|---------|---------|---------|---------|---------|---------|-----------|-----------|----------|---|-----------|-----------|
|    |       |                                   | 54      | 74      | 65      | 2       | 26      | 75      | 867       |           | 88       | n | 84        | 41        |
|    |       |                                   |         |         |         |         |         |         |           |           | 67       |   | 51        | 57        |
| 76 | CA6   | Carbonic anhydrase VI             | 4.37888 | 6.77691 | 6.64757 | 4.26079 | 3.98548 | 4.65397 | -3.104526 | -1.634373 | 3.104526 | D | 0.036613  | 0.4140900 |
|    |       |                                   |         |         |         |         |         |         |           |           | 87       |   | 92        | 13        |
| 88 | LIN7A | Lin-7 homolog A (C. Elegans)      | 7.30101 | 6.25213 | 5.76903 | 5.12114 | 5.28461 | 4.23386 | -2.950282 | -1.560853 | 2.950282 | D | 0.0116824 | 0.3284702 |
|    |       |                                   |         |         |         |         |         |         |           |           | 68       |   | 94        | 47        |
| 10 | N4BP2 | NEDD4 binding protein 2-like 2    | 7.289   | 7.14744 | 6.797   | 6.52615 | 5.25673 | 6.06137 | -2.188177 | -1.12973  | 2.188177 | D | 0.0155184 | 0.3505330 |
|    | L2    |                                   |         |         |         |         |         |         |           |           | 47       |   | 66        | 52        |
| 26 | AUTS  | Autism susceptibility candidate 2 | 6.22324 | 6.96843 | 6.29985 | 4.63263 | 5.66184 | 5.88338 | -2.150327 | -1.104556 | 2.150327 | D | 0.0251454 | 0.3837127 |
|    | 2     |                                   |         |         |         |         |         |         |           |           | 94       |   | 01        | 62        |
| 31 | HMGA  | High mobility group AT-hook 1     | 8.37932 | 8.85922 | 8.47145 | 9.4543  | 10.2331 | 8.92852 | 2.10149   | 1.07139   | 2.10149  | U | 0.0172455 | 0.3603035 |
|    | 1     |                                   |         |         |         |         |         |         |           |           | 93       |   | 83        | 68        |
| 87 | MYO   | Myomesin 1                        | 9.12786 | 8.02416 | 8.85932 | 8.11391 | 6.2316  | 5.92964 | -3.763469 | -1.912063 | 3.763469 | D | 0.0162963 | 0.3539090 |
|    | M1    |                                   |         |         |         |         |         |         |           |           | 4        |   | 58        | 69        |
| 89 | SNUR  | SNRPN upstream reading frame      | 9.90523 | 8.46536 | 9.54754 | 7.89773 | 8.28397 | 7.41102 | -2.716602 | -1.441803 | 2.716602 | D | 0.0165959 | 0.3276598 |
|    | F     |                                   |         |         |         |         |         |         |           |           | 2        |   | 93        | 66        |
| 65 | BMP7  | Bone morphogenetic protein 7      | 5.44982 | 6.78327 | 6.76044 | 4.86827 | 5.11995 | 5.52412 | -2.235188 | -1.160396 | 2.235188 | D | 0.0180749 | 0.3831318 |
|    |       |                                   |         |         |         |         |         |         |           |           | 53       |   | 49        | 63        |
| 62 | S100B | S100 calcium binding protein B    | 5.93    | 4.459   | 4.413   | 3.360   | 3.398   | 3.389   | -2.086    | -1.060    | 2.086    | D | 0.049     | 0.446     |

|                |              |                                               |                     |                     |                     |                     |                     |                     |                          |                          |                             |                  |                             |                             |
|----------------|--------------|-----------------------------------------------|---------------------|---------------------|---------------------|---------------------|---------------------|---------------------|--------------------------|--------------------------|-----------------------------|------------------|-----------------------------|-----------------------------|
|                |              |                                               | 38<br>8             | 63<br>6             | 88<br>1             | 61<br>4             | 17                  | 89<br>3             | 030<br>136               | 76                       | 03<br>01<br>36              | w<br>n           | 29<br>93<br>82              | 17<br>48                    |
| 11<br>21<br>5  | AKAP<br>11   | A-kinase<br>anchoring protein<br>11           | 3.<br>95<br>17<br>4 | 3.<br>34<br>76<br>8 | 3.<br>30<br>37<br>7 | 4.<br>29<br>16<br>7 | 5.<br>33<br>13<br>3 | 4.<br>54<br>95      | 2.2<br>811<br>637<br>31  | 1.1<br>897<br>7          | 2.2<br>81<br>16<br>37<br>31 | U<br>p           | 0.0<br>07<br>90<br>12<br>62 | 0.2<br>99<br>13<br>95<br>54 |
| 23<br>35<br>3  | SUN1         | Sad1 and UNC84<br>domain containing<br>1      | 5.<br>55<br>62<br>7 | 5.<br>99<br>51<br>5 | 6.<br>19<br>20<br>5 | 6.<br>88<br>26<br>2 | 7.<br>33<br>43      | 7.<br>02<br>63      | 2.2<br>447<br>944<br>28  | 1.1<br>665<br>833<br>33  | 2.2<br>44<br>79<br>44<br>28 | U<br>p           | 0.0<br>02<br>56<br>56<br>49 | 0.2<br>21<br>48<br>56<br>65 |
| 10<br>11<br>2  | KIF20<br>A   | Kinesin family<br>member 20A                  | 4.<br>78<br>43<br>8 | 4.<br>33<br>11      | 4.<br>42<br>19<br>7 | 6.<br>87<br>49<br>8 | 5.<br>79<br>33<br>9 | 5.<br>84<br>86<br>7 | 3.1<br>598<br>658<br>99  | 1.6<br>598<br>633<br>33  | 3.1<br>59<br>86<br>58<br>99 | U<br>p           | 0.0<br>01<br>71<br>46<br>41 | 0.1<br>90<br>75<br>21<br>3  |
| 13<br>07       | COL16<br>A1  | Collagen, type<br>XVI, $\alpha$ 1             | 5.<br>89<br>15<br>2 | 5.<br>41<br>51      | 6.<br>25<br>32<br>7 | 7.<br>13<br>43<br>2 | 7.<br>42<br>96<br>7 | 7.<br>72<br>44<br>9 | 2.9<br>818<br>272<br>25  | 1.5<br>761<br>966<br>67  | 2.9<br>81<br>82<br>72<br>25 | U<br>p           | 0.0<br>01<br>02<br>61<br>89 | 0.1<br>86<br>14<br>79<br>2  |
| 39<br>95<br>12 | SLC25<br>A35 | Solute carrier<br>family 25, member<br>35     | 6.<br>45<br>24<br>3 | 6.<br>85<br>01<br>5 | 7.<br>00<br>71<br>3 | 6.<br>27<br>44<br>4 | 5.<br>43<br>28<br>3 | 5.<br>26<br>73<br>1 | -2.<br>161<br>016<br>369 | -1.<br>111<br>71         | 2.1<br>61<br>01<br>63<br>69 | D<br>o<br>w<br>n | 0.0<br>11<br>20<br>37<br>71 | 0.3<br>24<br>71<br>81<br>92 |
| 69<br>16       | TBXA<br>S1   | Thromboxane A<br>synthase 1                   | 6.<br>03<br>85<br>2 | 4.<br>84<br>55<br>9 | 5.<br>34<br>15<br>6 | 3.<br>57<br>72<br>8 | 4.<br>60<br>74<br>8 | 4.<br>08<br>81<br>6 | -2.<br>492<br>482<br>427 | -1.<br>317<br>583<br>333 | 2.4<br>92<br>48<br>24<br>27 | D<br>o<br>w<br>n | 0.0<br>11<br>00<br>61<br>78 | 0.3<br>24<br>27<br>76<br>54 |
| 21<br>77       | FANC<br>D2   | Fanconi anemia<br>complementation<br>group D2 | 4.<br>59<br>27<br>4 | 3.<br>96<br>19<br>3 | 4.<br>03<br>95<br>2 | 5.<br>16<br>71      | 5.<br>71<br>96      | 5.<br>33<br>09<br>1 | 2.3<br>098<br>620<br>07  | 1.2<br>078<br>066<br>67  | 2.3<br>09<br>86<br>20<br>07 | U<br>p           | 0.0<br>02<br>18<br>84<br>52 | 0.2<br>10<br>07<br>53<br>08 |
| 68<br>40       | SVIL         | Supervillin                                   | 5.<br>94<br>93<br>5 | 5.<br>61<br>05<br>5 | 6.<br>19<br>17<br>3 | 6.<br>81<br>46<br>4 | 7.<br>26<br>61<br>9 | 6.<br>91<br>89<br>5 | 2.1<br>180<br>206<br>67  | 1.0<br>827<br>166<br>67  | 2.1<br>18<br>02<br>06<br>67 | U<br>p           | 0.0<br>03<br>28<br>94<br>24 | 0.2<br>36<br>57<br>62<br>18 |
| 11             | OSBP         | Oxysterol binding                             | 5.                  | 4.                  | 5.                  | 6.                  | 6.                  | 7.                  | 2.9                      | 1.5                      | 2.9                         | U                | 0.0                         | 0.2                         |

|               |             |                                                                           |                     |                     |                     |                     |                     |                     |                          |                          |                             |                  |                             |                             |
|---------------|-------------|---------------------------------------------------------------------------|---------------------|---------------------|---------------------|---------------------|---------------------|---------------------|--------------------------|--------------------------|-----------------------------|------------------|-----------------------------|-----------------------------|
| 48<br>84      | L10         | protein like 10                                                           | 38<br>00<br>6       | 80<br>47<br>8       | 31<br>75<br>1       | 87<br>62<br>7       | 02<br>51<br>1       | 24<br>07<br>9       | 212<br>921<br>94         | 466<br>066<br>67         | 21<br>29<br>21<br>94        | p                | 03<br>46<br>17<br>23        | 37<br>14<br>66<br>6         |
| 65<br>84      | SLC22<br>A5 | Solute carrier family 22 (organic cation/carnitine transporter), member 5 | 8.<br>52<br>77<br>8 | 7.<br>65<br>92<br>4 | 7.<br>69<br>31<br>1 | 7.<br>11<br>87<br>6 | 6.<br>64<br>73<br>6 | 7.<br>05<br>32<br>9 | -2.<br>028<br>256<br>343 | -1.<br>020<br>24         | 2.0<br>28<br>25<br>63<br>43 | D<br>o<br>w<br>n | 0.0<br>12<br>68<br>65<br>79 | 0.3<br>36<br>17<br>41<br>55 |
| 15<br>51      | CYP3<br>A7  | Cytochrome P450, family 3, subfamily A, polypeptide 7                     | 7.<br>71<br>90<br>3 | 5.<br>12<br>61<br>3 | 6.<br>91<br>82<br>6 | 4.<br>31<br>60<br>8 | 5.<br>09<br>11<br>9 | 4.<br>26<br>22      | -4.<br>087<br>777<br>486 | -2.<br>031<br>316<br>667 | 4.0<br>87<br>77<br>74<br>86 | D<br>o<br>w<br>n | 0.0<br>16<br>02<br>15<br>61 | 0.3<br>51<br>79<br>95<br>96 |
| 86            | ACTL<br>6A  | Actin like 6A                                                             | 4.<br>84<br>80<br>1 | 4.<br>87<br>30<br>4 | 4.<br>88<br>81      | 5.<br>82<br>40<br>4 | 6.<br>10<br>26<br>4 | 6.<br>53<br>75<br>6 | 2.4<br>368<br>712        | 1.2<br>850<br>3          | 2.4<br>36<br>87<br>12       | U<br>p           | 0.0<br>01<br>01<br>27<br>06 | 0.1<br>86<br>14<br>79<br>2  |
| 64<br>85<br>9 | NABP<br>1   | Nucleic acid binding protein 1                                            | 5.<br>57<br>85<br>8 | 5.<br>41<br>65<br>9 | 4.<br>83<br>19<br>5 | 6.<br>71<br>34<br>4 | 7.<br>71<br>06<br>3 | 5.<br>78<br>65<br>6 | 2.7<br>533<br>156<br>21  | 1.4<br>611<br>7          | 2.7<br>53<br>31<br>56<br>21 | U<br>p           | 0.0<br>20<br>80<br>99<br>12 | 0.3<br>71<br>75<br>23<br>82 |
| 41<br>71      | MCM2        | Minichromosome maintenance complex component 2                            | 4.<br>92<br>43<br>2 | 4.<br>36<br>94<br>7 | 4.<br>62<br>21<br>9 | 5.<br>85<br>04<br>2 | 6.<br>54<br>04<br>3 | 5.<br>00<br>88<br>8 | 2.2<br>365<br>112<br>26  | 1.1<br>612<br>5          | 2.2<br>36<br>51<br>12<br>26 | U<br>p           | 0.0<br>22<br>41<br>68<br>21 | 0.3<br>78<br>66<br>05<br>33 |
| 55<br>14<br>3 | CDCA<br>8   | Cell division cycle associated 8                                          | 4.<br>96<br>34<br>9 | 4.<br>87<br>68<br>3 | 5.<br>25<br>67<br>1 | 6.<br>75<br>52<br>9 | 7.<br>16<br>82<br>3 | 6.<br>23<br>12      | 3.2<br>174<br>030<br>28  | 1.6<br>858<br>966<br>67  | 3.2<br>17<br>40<br>30<br>28 | U<br>p           | 0.0<br>00<br>64<br>37<br>16 | 0.1<br>72<br>63<br>18<br>47 |
| 51<br>05<br>3 | GMNN        | Geminin, DNA replication inhibitor                                        | 6.<br>46<br>02<br>6 | 5.<br>17<br>28<br>4 | 5.<br>21<br>67      | 8.<br>05<br>89<br>8 | 7.<br>47<br>05<br>7 | 7.<br>30<br>88<br>3 | 3.9<br>894<br>595<br>91  | 1.9<br>961<br>933<br>33  | 3.9<br>89<br>45<br>95<br>91 | U<br>p           | 0.0<br>01<br>82<br>68<br>18 | 0.1<br>93<br>41<br>99<br>68 |
| 70<br>06      | TEC         | Tec protein tyrosine kinase                                               | 6.<br>44<br>01<br>6 | 6.<br>87<br>35<br>1 | 6.<br>67<br>12<br>5 | 6.<br>15<br>22<br>9 | 5.<br>27<br>17<br>4 | 5.<br>43<br>48<br>5 | -2.<br>059<br>099<br>197 | -1.<br>042<br>013<br>333 | 2.0<br>59<br>09<br>91<br>97 | D<br>o<br>w<br>n | 0.0<br>09<br>07<br>66<br>06 | 0.3<br>10<br>47<br>42<br>9  |

|                           |                       |                                                                                                  |                     |                     |                     |                     |                      |                     |                          |                          |                             |                  |                             |                             |
|---------------------------|-----------------------|--------------------------------------------------------------------------------------------------|---------------------|---------------------|---------------------|---------------------|----------------------|---------------------|--------------------------|--------------------------|-----------------------------|------------------|-----------------------------|-----------------------------|
| 68<br>18                  | SULT1<br>A3           | Sulfotransferase<br>family 1A member<br>3                                                        | 6.<br>47<br>72<br>2 | 6.<br>93<br>54<br>7 | 6.<br>66<br>10<br>6 | 7.<br>80<br>23<br>3 | 8.<br>02<br>89<br>9  | 7.<br>66<br>66<br>2 | 2.2<br>059<br>447<br>64  | 1.1<br>413<br>966<br>67  | 2.2<br>05<br>94<br>47<br>64 | U<br>p           | 0.0<br>01<br>52<br>38<br>01 | 0.1<br>87<br>10<br>78<br>18 |
| 10<br>05<br>34<br>61<br>2 | C1QT<br>NF3-A<br>MACR | C1QTNF3-AMAC<br>R readthrough<br>(NMD candidate)                                                 | 6.<br>62<br>88<br>8 | 7.<br>90<br>19<br>2 | 8.<br>15<br>96<br>1 | 7.<br>05<br>71<br>4 | 6.<br>28<br>86<br>9  | 5.<br>00<br>31<br>3 | -2.<br>726<br>688<br>699 | -1.<br>447<br>15         | 2.7<br>26<br>68<br>86<br>99 | D<br>o<br>w<br>n | 0.0<br>49<br>42<br>39<br>73 | 0.4<br>46<br>17<br>48       |
| 80<br>34<br>4             | DCAF<br>11            | DDB1 and CUL4<br>associated factor<br>11                                                         | 9.<br>07<br>58<br>6 | 9.<br>18<br>30<br>2 | 9.<br>33<br>39<br>7 | 8.<br>23<br>39<br>5 | 8.<br>15<br>63<br>9  | 7.<br>87<br>53<br>3 | -2.<br>157<br>050<br>571 | -1.<br>109<br>06         | 2.1<br>57<br>05<br>05<br>71 | D<br>o<br>w<br>n | 0.0<br>01<br>22<br>64<br>88 | 0.1<br>86<br>57<br>68<br>41 |
| 40<br>92                  | SMAD<br>7             | SMAD family<br>member 7                                                                          | 6.<br>14<br>17<br>2 | 7.<br>57<br>05<br>6 | 6.<br>87<br>42<br>8 | 4.<br>86<br>76<br>6 | 6.<br>47<br>47<br>8  | 4.<br>85<br>49<br>6 | -2.<br>756<br>912<br>221 | -1.<br>463<br>053<br>333 | 2.7<br>56<br>91<br>22<br>21 | D<br>o<br>w<br>n | 0.0<br>31<br>90<br>61<br>5  | 0.4<br>03<br>02<br>01<br>62 |
| 10<br>01<br>30<br>93<br>3 | SMIM<br>6             | Small integral<br>membrane protein<br>6                                                          | 7.<br>53<br>43      | 6.<br>50<br>36<br>6 | 6.<br>85<br>33<br>9 | 5.<br>08<br>24<br>4 | 4.<br>84<br>13<br>3  | 6.<br>58<br>78<br>5 | -2.<br>750<br>912<br>02  | -1.<br>459<br>91         | 2.7<br>50<br>91<br>20<br>2  | D<br>o<br>w<br>n | 0.0<br>24<br>22<br>31<br>72 | 0.3<br>82<br>58<br>70<br>8  |
| 13<br>33<br>08            | SLC9B<br>2            | Solute carrier<br>family 9,<br>subfamily B<br>(NHA2, cation<br>proton antiporter<br>2), member 2 | 6.<br>76<br>92<br>1 | 5.<br>85<br>73      | 7.<br>36<br>34<br>5 | 5.<br>66<br>99<br>2 | 5.<br>84<br>93<br>1  | 4.<br>48<br>74<br>1 | -2.<br>510<br>149<br>574 | -1.<br>327<br>773<br>333 | 2.5<br>10<br>14<br>95<br>74 | D<br>o<br>w<br>n | 0.0<br>32<br>71<br>35<br>62 | 0.4<br>04<br>71<br>37<br>9  |
| 29<br>20                  | CXCL<br>2             | Chemokine<br>(C-X-C motif)<br>ligand 2                                                           | 6.<br>12<br>23<br>4 | 6.<br>75<br>55<br>5 | 6.<br>52<br>92<br>5 | 8.<br>62<br>19<br>4 | 7.<br>13<br>11<br>4  | 7.<br>73<br>94<br>2 | 2.5<br>700<br>326<br>13  | 1.3<br>617<br>866<br>67  | 2.5<br>70<br>03<br>26<br>13 | U<br>p           | 0.0<br>11<br>92<br>07<br>91 | 0.3<br>30<br>77<br>65<br>6  |
| 12<br>84                  | COL4<br>A2            | Collagen, type IV,<br>$\alpha$ 2                                                                 | 8.<br>56<br>94<br>4 | 7.<br>73<br>15<br>8 | 7.<br>88<br>74<br>3 | 8.<br>94<br>56<br>7 | 10<br>.3<br>26<br>01 | 8.<br>75<br>88<br>4 | 2.4<br>295<br>514<br>76  | 1.2<br>806<br>9          | 2.4<br>29<br>55<br>14<br>76 | U<br>p           | 0.0<br>27<br>95<br>72<br>17 | 0.3<br>92<br>00<br>23<br>37 |
| 80<br>01<br>7             | C14orf<br>159         | Chromosome 14<br>open reading<br>frame 159                                                       | 8.<br>62<br>36      | 8.<br>58<br>50      | 8.<br>69<br>54      | 6.<br>41<br>28      | 7.<br>14<br>68       | 8.<br>21<br>48      | -2.<br>596<br>407        | -1.<br>376<br>516        | 2.5<br>96<br>40             | D<br>o<br>w      | 0.0<br>16<br>77             | 0.3<br>57<br>44             |

|                |               |                                                                                                   |                     |                      |                      |                     |                     |                     |                          |                          |                             |                  |                             |                             |
|----------------|---------------|---------------------------------------------------------------------------------------------------|---------------------|----------------------|----------------------|---------------------|---------------------|---------------------|--------------------------|--------------------------|-----------------------------|------------------|-----------------------------|-----------------------------|
|                |               |                                                                                                   | 5                   | 8                    | 7                    | 8                   | 9                   | 8                   | 208                      | 667                      | 72                          | n                | 56                          | 25                          |
|                |               |                                                                                                   |                     |                      |                      |                     |                     |                     |                          |                          | 08                          |                  | 46                          | 46                          |
| 51<br>36<br>3  | CHST1<br>5    | Carbohydrate<br>(N-acetylgalactosa<br>mine 4-sulfate<br>6-O)<br>sulfotransferase 15               | 6.<br>43<br>63<br>7 | 6.<br>80<br>34<br>5  | 7.<br>38<br>17<br>6  | 3.<br>23<br>79<br>6 | 6.<br>18<br>24<br>2 | 5.<br>78<br>31<br>2 | -3.<br>496<br>779<br>115 | -1.<br>806<br>026<br>667 | 3.4<br>96<br>77<br>91<br>15 | D<br>o<br>w<br>n | 0.0<br>47<br>96<br>36<br>88 | 0.4<br>43<br>39<br>63<br>77 |
| 29<br>19       | CXCL<br>1     | Chemokine<br>(C-X-C motif)<br>ligand 1<br>(melanoma growth<br>stimulating<br>activity, $\alpha$ ) | 6.<br>01<br>56<br>3 | 6.<br>83<br>1        | 6.<br>62<br>25       | 9.<br>22<br>28<br>4 | 7.<br>32<br>50<br>5 | 7.<br>90<br>47<br>1 | 3.1<br>626<br>998<br>95  | 1.6<br>611<br>566<br>67  | 3.1<br>62<br>69<br>98<br>95 | U<br>p           | 0.0<br>13<br>01<br>36<br>62 | 0.3<br>36<br>17<br>41<br>55 |
| 90<br>52       | GPRC<br>5A    | G protein-coupled<br>receptor, class C,<br>group 5, member<br>A                                   | 4.<br>53<br>71<br>1 | 7.<br>68<br>27<br>1  | 7.<br>50<br>82<br>4  | 8.<br>95<br>45<br>2 | 9.<br>01<br>76<br>1 | 9.<br>69<br>49<br>9 | 6.2<br>608<br>274<br>18  | 2.6<br>463<br>533<br>33  | 6.2<br>60<br>82<br>74<br>18 | U<br>p           | 0.0<br>14<br>50<br>39<br>28 | 0.3<br>46<br>82<br>70<br>31 |
| 80<br>11<br>5  | BAIAP<br>2L2  | BAI1-associated<br>protein 2-like 2                                                               | 9.<br>01<br>03<br>5 | 9.<br>09<br>34<br>1  | 9.<br>24<br>17<br>5  | 8.<br>52<br>55<br>9 | 7.<br>95<br>99<br>7 | 7.<br>48<br>41<br>7 | -2.<br>181<br>408<br>56  | -1.<br>125<br>26         | 2.1<br>81<br>40<br>85<br>6  | D<br>o<br>w<br>n | 0.0<br>07<br>19<br>64<br>02 | 0.2<br>91<br>19<br>36<br>41 |
| 28<br>55<br>96 | FAM1<br>53A   | Family with<br>sequence<br>similarity 153<br>member A                                             | 6.<br>87<br>68<br>9 | 6.<br>80<br>65<br>5  | 6.<br>70<br>38<br>9  | 3.<br>93<br>42<br>4 | 3.<br>95<br>25<br>1 | 5.<br>88<br>33<br>8 | -4.<br>613<br>089<br>661 | -2.<br>205<br>733<br>333 | 4.6<br>13<br>08<br>96<br>61 | D<br>o<br>w<br>n | 0.0<br>04<br>08<br>31<br>77 | 0.2<br>44<br>25<br>17<br>2  |
| 44<br>14<br>30 | ANKR<br>D20A2 | Ankyrin repeat<br>domain 20 family<br>member A2                                                   | 7.<br>46<br>14<br>8 | 7.<br>42<br>23<br>2  | 7.<br>32<br>89<br>1  | 7.<br>15<br>84<br>3 | 5.<br>30<br>81<br>1 | 5.<br>41<br>93<br>7 | -2.<br>717<br>474<br>819 | -1.<br>442<br>266<br>667 | 2.7<br>17<br>47<br>48<br>19 | D<br>o<br>w<br>n | 0.0<br>22<br>22<br>55<br>45 | 0.3<br>78<br>35<br>72<br>21 |
| 79<br>13       | DEK           | DEK<br>proto-oncogene                                                                             | 6.<br>60<br>95<br>2 | 6.<br>09<br>51<br>6  | 6.<br>46<br>63<br>5  | 6.<br>63<br>41<br>6 | 8.<br>41<br>62      | 7.<br>39<br>01<br>5 | 2.1<br>284<br>846<br>22  | 1.0<br>898<br>266<br>67  | 2.1<br>28<br>48<br>46<br>22 | U<br>p           | 0.0<br>45<br>97<br>40<br>33 | 0.4<br>39<br>25<br>30<br>47 |
| 92<br>30<br>4  | SCGB<br>3A1   | Secretoglobin,<br>family 3A,<br>member 1                                                          | 6.<br>11<br>84<br>9 | 11<br>.9<br>37<br>23 | 11<br>.5<br>72<br>22 | 6.<br>30<br>99<br>9 | 5.<br>93<br>14<br>5 | 6.<br>36<br>90<br>8 | -12<br>.75<br>042<br>414 | -3.<br>672<br>473<br>333 | 12.<br>75<br>04<br>24<br>14 | D<br>o<br>w<br>n | 0.0<br>38<br>92<br>57<br>37 | 0.4<br>21<br>03<br>81<br>05 |
| 57             | PDSS2         | Prenyl                                                                                            | 6.                  | 6.                   | 6.                   | 4.                  | 5.                  | 5.                  | -2.                      | -1.                      | 2.0                         | D                | 0.0                         | 0.1                         |

|        |          |                                                               |         |         |          |           |          |          |              |             |             |                  |             |             |
|--------|----------|---------------------------------------------------------------|---------|---------|----------|-----------|----------|----------|--------------|-------------|-------------|------------------|-------------|-------------|
| 107    |          | (decaprenyl) diphosphate synthase, subunit 2                  | 00495   | 25285   | 0158     | 9651      | 02898    | 1051     | 082197138    | 058106667   | 82197138    | o<br>w<br>n      | 00870132    | 81040924    |
| 552900 | BOLA2    | Bola family member 2                                          | 5.95624 | 6.50923 | 6.39438  | 8.01357   | 7.61265  | 7.36258  | 2.596047295  | 1.376316667 | 2.596047295 | U<br>p           | 0.001362471 | 0.187107818 |
| 81563  | C1orf21  | Chromosome 1 open reading frame 21                            | 5.25422 | 4.61825 | 6.27454  | 8.57683   | 7.2181   | 6.30278  | 3.95469564   | 1.983566667 | 3.95469564  | U<br>p           | 0.018514388 | 0.364586001 |
| 64710  | NUCKS1   | Nuclear casein kinase and cyclin-dependent kinase substrate 1 | 7.75286 | 7.7977  | 7.71216  | 9.75686   | 8.52031  | 8.83208  | 2.432053     | 1.282167    | 2.432053    | U<br>p           | 0.006939076 | 0.288892706 |
| 4869   | NPM1     | Nucleophosmin (nucleolar phosphoprotein B23, numatrin)        | 9.36755 | 9.59531 | 10.21948 | 10.73509  | 10.67459 | 11.24587 | 2.2310713    | 1.15773667  | 2.2310713   | U<br>p           | 0.00357066  | 0.28384482  |
| 285220 | EPHA6    | EPH receptor A6                                               | 6.10287 | 6.54138 | 7.63206  | 3.1894    | 3.53826  | 4.51907  | -8.054862714 | -3.00986    | 8.054862714 | D<br>o<br>w<br>n | 0.00491776  | 0.164248294 |
| 112495 | GTF3C6   | General transcription factor IIIC subunit 6                   | 7.74902 | 6.31843 | 6.68562  | 6.10562   | 5.79173  | 5.30593  | -2.323411    | -1.21659667 | 2.323411    | D<br>o<br>w<br>n | 0.020902203 | 0.371993438 |
| 51195  | RAPGEFL1 | Rap guanine nucleotide exchange factor like 1                 | 8.95569 | 7.27804 | 8.59529  | 10.276721 | 8.91463  | 9.40047  | 2.38022872   | 1.251067    | 2.38022872  | U<br>p           | 0.048772146 | 0.446143522 |
| 8399   | PLA2G10  | Phospholipase A2 group X                                      | 5.90862 | 5.88874 | 6.28563  | 8.01339   | 6.56253  | 8.50266  | 3.171562     | 1.66519667  | 3.171562    | U<br>p           | 0.011590415 | 0.327659866 |

|                |             |                                                             |                     |                     |                     |                     |                     |                     |                          |                              |                             |                  |                             |                             |
|----------------|-------------|-------------------------------------------------------------|---------------------|---------------------|---------------------|---------------------|---------------------|---------------------|--------------------------|------------------------------|-----------------------------|------------------|-----------------------------|-----------------------------|
| 22<br>97<br>4  | TPX2        | TPX2,<br>microtubule-associated                             | 5.<br>30<br>84<br>9 | 4.<br>40<br>73<br>6 | 4.<br>95<br>36<br>2 | 7.<br>30<br>59<br>3 | 8.<br>17<br>03<br>1 | 6.<br>66<br>31<br>4 | 5.6<br>176<br>626<br>86  | 2.4<br>899<br>7<br>66        | 5.6<br>17<br>66<br>26<br>86 | U<br>p           | 0.0<br>00<br>67<br>27<br>99 | 0.1<br>72<br>63<br>18<br>47 |
| 35<br>29<br>54 | GATS        | GATS, stromal<br>antigen 3 opposite<br>strand               | 6.<br>35<br>48<br>1 | 7.<br>73<br>48      | 7.<br>66<br>73<br>5 | 5.<br>17<br>99<br>7 | 4.<br>94<br>78<br>8 | 6.<br>20<br>35<br>3 | -3.<br>502<br>843<br>825 | -1.<br>808<br>526<br>667     | 3.5<br>02<br>84<br>38<br>25 | D<br>o<br>w<br>n | 0.0<br>07<br>55<br>85<br>29 | 0.2<br>95<br>71<br>33<br>58 |
| 63<br>59       | CCL15       | Chemokine (C-C<br>motif) ligand 15                          | 6.<br>91<br>41<br>9 | 4.<br>95<br>20<br>6 | 5.<br>09<br>48<br>1 | 6.<br>65<br>26<br>4 | 7.<br>33<br>96<br>8 | 7.<br>94<br>89<br>6 | 3.1<br>603<br>258<br>85  | 1.6<br>600<br>733<br>33      | 3.1<br>60<br>32<br>58<br>85 | U<br>p           | 0.0<br>25<br>80<br>14<br>01 | 0.3<br>85<br>33<br>44<br>54 |
| 26<br>78<br>3  | SNOR<br>A65 | Small nucleolar<br>RNA, H/ACA box<br>65                     | 7.<br>82<br>56<br>8 | 8.<br>57<br>45<br>8 | 8.<br>49<br>76<br>8 | 9.<br>69<br>12<br>1 | 8.<br>57<br>82<br>4 | 9.<br>73<br>37<br>9 | 2.0<br>492<br>556<br>85  | 1.0<br>351<br>25<br>56<br>85 | 2.0<br>49<br>25<br>56<br>85 | U<br>p           | 0.0<br>32<br>07<br>72<br>4  | 0.4<br>03<br>67<br>11<br>92 |
| 77<br>0        | CA11        | Carbonic<br>anhydrase XI                                    | 7.<br>70<br>42      | 7.<br>42<br>66<br>1 | 7.<br>41<br>73<br>9 | 6.<br>17<br>37<br>1 | 5.<br>53<br>15<br>9 | 5.<br>01<br>11<br>5 | -3.<br>847<br>487<br>573 | -1.<br>943<br>916<br>667     | 3.8<br>47<br>48<br>75<br>73 | D<br>o<br>w<br>n | 0.0<br>00<br>55<br>17<br>31 | 0.1<br>64<br>81<br>87<br>25 |
| 29<br>02<br>8  | ATAD<br>2   | Atpase family,<br>AAA domain<br>containing 2                | 4.<br>47<br>41<br>5 | 4.<br>22<br>60<br>9 | 4.<br>25<br>67<br>4 | 6.<br>61<br>93<br>9 | 7.<br>29<br>39      | 5.<br>55<br>98      | 4.5<br>065<br>914<br>49  | 2.1<br>720<br>366<br>67      | 4.5<br>06<br>59<br>14<br>49 | U<br>p           | 0.0<br>01<br>43<br>56<br>43 | 0.1<br>87<br>10<br>78<br>18 |
| 50<br>74       | PAWR        | PRKC, apoptosis,<br>WT1, regulator                          | 4.<br>47<br>10<br>3 | 4.<br>68<br>38<br>1 | 4.<br>02<br>00<br>2 | 4.<br>90<br>29<br>6 | 6.<br>41<br>55<br>4 | 5.<br>47<br>19<br>5 | 2.3<br>056<br>869<br>81  | 1.2<br>051<br>966<br>67      | 2.3<br>05<br>68<br>69<br>81 | U<br>p           | 0.0<br>20<br>48<br>63<br>58 | 0.3<br>71<br>13<br>26<br>99 |
| 43<br>30       | MN1         | Meningioma<br>(disrupted in<br>balanced<br>translocation) 1 | 4.<br>29<br>58<br>8 | 4.<br>24<br>13<br>2 | 4.<br>07<br>85<br>7 | 5.<br>50<br>98<br>9 | 5.<br>74<br>22<br>7 | 4.<br>41<br>51<br>8 | 2.0<br>239<br>729<br>38  | 1.0<br>171<br>9<br>38        | 2.0<br>23<br>97<br>29<br>38 | U<br>p           | 0.0<br>24<br>17<br>22<br>33 | 0.3<br>82<br>49<br>69<br>57 |
| 13<br>08       | COL17<br>A1 | Collagen, type<br>XVII, $\alpha$ 1                          | 3.<br>84<br>20<br>5 | 4.<br>34<br>57<br>5 | 3.<br>96<br>49<br>6 | 7.<br>77<br>44<br>6 | 7.<br>34<br>74<br>1 | 5.<br>33<br>48<br>5 | 6.8<br>115<br>667<br>09  | 2.7<br>679<br>866<br>67      | 6.8<br>11<br>56<br>67       | U<br>p           | 0.0<br>02<br>71<br>18       | 0.2<br>26<br>76<br>71       |



|                           |             |                                                 |   |                     |                     |                     |                     |                     |                     |                          |                             |                             |                  |                             |                             |
|---------------------------|-------------|-------------------------------------------------|---|---------------------|---------------------|---------------------|---------------------|---------------------|---------------------|--------------------------|-----------------------------|-----------------------------|------------------|-----------------------------|-----------------------------|
|                           |             |                                                 |   |                     |                     |                     |                     |                     |                     |                          |                             | 09                          |                  | 72                          | 12                          |
| 64<br>38<br>66            | CBLN<br>3   | Cerebellin<br>precursor                         | 3 | 5.<br>82<br>85<br>7 | 4.<br>91<br>23<br>6 | 6.<br>22<br>33<br>2 | 4.<br>80<br>43<br>8 | 4.<br>49<br>85<br>6 | 4.<br>62<br>84<br>3 | -2.<br>015<br>251<br>645 | -1.<br>010<br>96            | 2.0<br>15<br>25<br>16<br>45 | D<br>o<br>w<br>n | 0.0<br>22<br>90<br>66<br>68 | 0.3<br>80<br>34<br>02<br>59 |
| 10<br>01<br>24<br>69<br>6 | TEC         | Transient<br>erythroblastopenia<br>of childhood |   | 6.<br>44<br>01<br>6 | 6.<br>87<br>35<br>1 | 6.<br>67<br>12<br>5 | 6.<br>15<br>22<br>9 | 5.<br>27<br>17<br>4 | 5.<br>43<br>48<br>5 | -2.<br>059<br>099<br>197 | -1.<br>042<br>013<br>333    | 2.0<br>59<br>09<br>91<br>97 | D<br>o<br>w<br>n | 0.0<br>09<br>07<br>66<br>06 | 0.3<br>10<br>47<br>42<br>9  |
| 34<br>63<br>89            | MACC<br>1   | Metastasis<br>associated in colon<br>cancer 1   |   | 5.<br>94<br>53<br>2 | 6.<br>76<br>55<br>7 | 6.<br>82<br>31<br>6 | 6.<br>93<br>11      | 8.<br>12<br>51<br>4 | 8.<br>03<br>35<br>5 | 2.2<br>740<br>227<br>17  | 1.1<br>852<br>466<br>67     | 2.2<br>74<br>02<br>27<br>17 | U<br>p           | 0.0<br>22<br>84<br>25<br>31 | 0.3<br>79<br>92<br>11<br>68 |
| 23<br>09<br>5             | KIF1B       | Kinesin family<br>member 1B                     |   | 6.<br>15<br>78<br>3 | 6.<br>71<br>25<br>2 | 6.<br>75<br>30<br>6 | 5.<br>36<br>43<br>9 | 5.<br>75<br>19<br>2 | 4.<br>67<br>10<br>1 | -2.<br>426<br>196<br>948 | -1.<br>278<br>696<br>667    | 2.4<br>26<br>19<br>69<br>48 | D<br>o<br>w<br>n | 0.0<br>06<br>60<br>10<br>1  | 0.2<br>86<br>61<br>99<br>1  |
| 15<br>40<br>64            | RAET<br>1L  | Retinoic acid early<br>transcript 1L            |   | 5.<br>41<br>50<br>2 | 5.<br>18<br>69<br>7 | 4.<br>64<br>68<br>1 | 6.<br>32<br>89<br>6 | 5.<br>96<br>49<br>2 | 7.<br>31<br>17<br>1 | 2.7<br>363<br>700<br>28  | 1.4<br>522<br>633<br>33     | 2.7<br>36<br>37<br>00<br>28 | U<br>p           | 0.0<br>07<br>98<br>72<br>47 | 0.2<br>99<br>13<br>95<br>54 |
| 91<br>22<br>7             | GGTL<br>C2  | $\Gamma$ -glutamyltransfer<br>ase light chain 2 |   | 9.<br>16<br>15<br>7 | 9.<br>31<br>31<br>4 | 8.<br>59<br>69<br>8 | 7.<br>48<br>88<br>1 | 7.<br>56<br>93<br>1 | 5.<br>95<br>58<br>1 | -4.<br>053<br>739<br>364 | -2.<br>019<br>253<br>333    | 4.0<br>53<br>73<br>93<br>64 | D<br>o<br>w<br>n | 0.0<br>03<br>67<br>15<br>27 | 0.2<br>38<br>59<br>85<br>3  |
| 11<br>33<br>2             | ACOT<br>7   | Acyl-coa<br>thioesterase 7                      |   | 5.<br>41<br>99<br>2 | 5.<br>31<br>84<br>1 | 5.<br>62<br>66<br>6 | 6.<br>51<br>06<br>8 | 7.<br>97<br>26<br>8 | 6.<br>07<br>74<br>6 | 2.6<br>364<br>744<br>21  | 1.3<br>986<br>1<br>44<br>21 | 2.6<br>36<br>47<br>44<br>21 | U<br>p           | 0.0<br>22<br>24<br>96<br>07 | 0.3<br>78<br>43<br>70<br>47 |
| 10<br>77<br>8             | ZNF27<br>1P | Zinc finger protein<br>271, pseudogene          |   | 4.<br>17<br>26<br>5 | 4.<br>32<br>98<br>6 | 4.<br>09<br>63<br>4 | 3.<br>98<br>06<br>3 | 3.<br>32<br>46<br>9 | 2.<br>12<br>20<br>4 | -2.<br>080<br>836<br>1   | -1.<br>057<br>163<br>333    | 2.0<br>80<br>83<br>61       | D<br>o<br>w<br>n | 0.0<br>47<br>42<br>64<br>24 | 0.4<br>42<br>16<br>29<br>65 |
| 71<br>68                  | TPM1        | Tropomyosin 1 ( $\alpha$ )                      |   | 9.<br>95<br>52      | 8.<br>27<br>08      | 8.<br>94<br>65      | 10<br>.8<br>08      | 10<br>.1<br>93      | 9.<br>73<br>85      | 2.2<br>804<br>206        | 1.1<br>893                  | 2.2<br>80<br>42             | U<br>p           | 0.0<br>41<br>85             | 0.4<br>30<br>06             |

|        |        |                                                                        |         |         |         |         |         |         |           |           |          |                  |             |               |
|--------|--------|------------------------------------------------------------------------|---------|---------|---------|---------|---------|---------|-----------|-----------|----------|------------------|-------------|---------------|
|        |        |                                                                        | 8       | 3       |         | 86      | 09      | 6       | 96        |           | 06       |                  | 57          | 10            |
|        |        |                                                                        |         |         |         |         |         |         |           |           | 96       |                  | 63          | 29            |
| 10794  | ZNF460 | Zinc finger protein 460                                                | 4.4974  | 5.17904 | 4.80468 | 6.26405 | 6.02304 | 6.47506 | 2.68886   | 1.42701   | 2.68886  | U<br>p           | 0.0791562   | 0.177732945   |
| 80310  | PDGFD  | Platelet derived growth factor D                                       | 7.95359 | 7.64184 | 7.3505  | 5.88122 | 7.40075 | 6.15358 | -2.250314 | -1.170126 | 2.250314 | D<br>o<br>w<br>n | 0.027854543 | 0.391486937   |
| 113146 | AHNAK2 | AHNAK nucleoprotein 2                                                  | 5.39644 | 4.86092 | 4.81214 | 7.06393 | 6.70075 | 7.65228 | 4.33435   | 2.11582   | 4.33435  | U<br>p           | 0.0272108   | 0.15027275849 |
| 378925 | RNF148 | Ring finger protein 148                                                | 4.48208 | 5.6526  | 5.37564 | 4.48261 | 3.30998 | 3.63734 | -2.567083 | -1.36013  | 2.567083 | D<br>o<br>w<br>n | 0.012845893 | 0.336174155   |
| 25890  | ABI3BP | ABI family member 3 binding protein                                    | 4.2126  | 3.64696 | 3.75433 | 6.9172  | 6.51875 | 5.56809 | 5.51508   | 2.46333   | 5.51508  | U<br>p           | 0.0312895   | 0.157718351   |
| 22977  | AKR7A3 | Aldo-keto reductase family 7, member A3 (aflatoxin aldehyde reductase) | 8.72992 | 7.84341 | 9.01318 | 8.20103 | 6.99162 | 5.83152 | -2.869474 | -1.520786 | 2.869474 | D<br>o<br>w<br>n | 0.042586057 | 0.431964595   |
| 286077 | FAM83H | Family with sequence similarity 83 member H                            | 4.81924 | 4.59483 | 4.93723 | 7.20663 | 6.07069 | 5.19227 | 2.58961   | 1.36333   | 2.58961  | U<br>p           | 0.025152386 | 0.383712762   |
| 5327   | PLAT   | Plasminogen activator, tissue                                          | 5.06872 | 5.56338 | 4.58168 | 6.03882 | 7.94888 | 5.95605 | 2.982781  | 1.5766566 | 2.982781 | U<br>p           | 0.0866727   | 0.391486937   |
| 31     | HLA-   | Major                                                                  | 9.      | 8.      | 9.      | 5.      | 8.      | 7.      | -3.       | -1.       | 3.3      | D                | 0.0         | 0.4           |

|                |              |                                                              |                     |                     |                     |                     |                     |                     |                          |                          |                             |                  |                             |                             |
|----------------|--------------|--------------------------------------------------------------|---------------------|---------------------|---------------------|---------------------|---------------------|---------------------|--------------------------|--------------------------|-----------------------------|------------------|-----------------------------|-----------------------------|
| 08             | DMA          | histocompatibility complex, class II, DM $\alpha$            | 31<br>76<br>5       | 03<br>15<br>1       | 00<br>99<br>5       | 62<br>25<br>2       | 05<br>27<br>1       | 50<br>77<br>9       | 306<br>633<br>922        | 725<br>363<br>333        | 06<br>63<br>39<br>22        | o<br>w<br>n      | 34<br>79<br>06<br>27        | 08<br>42<br>39<br>81        |
| 12<br>49<br>89 | EFCA<br>B13  | EF-hand calcium binding domain 13                            | 4.<br>97<br>44<br>2 | 4.<br>62<br>97<br>9 | 4.<br>51<br>47<br>8 | 6.<br>78<br>18<br>8 | 4.<br>81<br>54<br>8 | 6.<br>34<br>31      | 2.4<br>180<br>152<br>33  | 1.2<br>738<br>233<br>33  | 2.4<br>18<br>01<br>52<br>33 | U<br>p           | 0.0<br>37<br>47<br>69<br>38 | 0.4<br>16<br>79<br>09<br>16 |
| 26<br>26       | GATA<br>4    | GATA binding protein 4                                       | 5.<br>56<br>24<br>3 | 4.<br>61<br>35<br>4 | 4.<br>37<br>89<br>1 | 5.<br>89<br>77      | 7.<br>19<br>7       | 6.<br>66<br>34<br>4 | 3.3<br>274<br>569<br>48  | 1.7<br>344<br>2<br>48    | 3.3<br>27<br>45<br>69<br>48 | U<br>p           | 0.0<br>05<br>41<br>00<br>75 | 0.2<br>69<br>32<br>15<br>26 |
| 67<br>11       | SPTB<br>N1   | Spectrin, $\beta$ , non-erythrocytic 1                       | 6.<br>75<br>85<br>3 | 5.<br>81<br>16      | 6.<br>27<br>04<br>9 | 7.<br>92<br>4       | 7.<br>96<br>01<br>9 | 8.<br>15<br>66<br>7 | 3.3<br>251<br>359<br>64  | 1.7<br>334<br>133<br>33  | 3.3<br>25<br>13<br>59<br>64 | U<br>p           | 0.0<br>00<br>50<br>55<br>74 | 0.1<br>64<br>24<br>82<br>94 |
| 12<br>59<br>31 | CEAC<br>AM20 | Carcinoembryonic antigen-related cell adhesion molecule 20   | 5.<br>76<br>23<br>6 | 7.<br>62<br>83<br>6 | 6.<br>67<br>85<br>8 | 5.<br>09<br>33<br>7 | 4.<br>97<br>56<br>2 | 5.<br>13<br>82<br>6 | -3.<br>075<br>206<br>591 | -1.<br>620<br>683<br>333 | 3.0<br>75<br>20<br>65<br>91 | D<br>o<br>w<br>n | 0.0<br>08<br>75<br>53<br>4  | 0.3<br>08<br>52<br>19<br>75 |
| 57<br>99       | PTPR<br>N2   | Protein tyrosine phosphatase, receptor type, N polypeptide 2 | 6.<br>42<br>61<br>1 | 8.<br>87<br>14      | 9.<br>21<br>76<br>8 | 5.<br>35<br>09<br>7 | 6.<br>28<br>34<br>5 | 6.<br>09<br>69<br>7 | -4.<br>794<br>122<br>145 | -2.<br>261<br>266<br>667 | 4.7<br>94<br>12<br>21<br>45 | D<br>o<br>w<br>n | 0.0<br>17<br>14<br>62<br>85 | 0.3<br>60<br>01<br>29<br>38 |
| 66<br>09       | SMPD<br>1    | Sphingomyelin phosphodiesterase 1, acid lysosomal            | 6.<br>23<br>40<br>2 | 6.<br>17<br>56<br>3 | 5.<br>93<br>12<br>3 | 4.<br>91<br>22<br>1 | 4.<br>93<br>47<br>2 | 4.<br>70<br>06<br>3 | -2.<br>402<br>339<br>42  | -1.<br>264<br>44         | 2.4<br>02<br>33<br>94<br>2  | D<br>o<br>w<br>n | 0.0<br>00<br>38<br>57<br>83 | 0.1<br>60<br>90<br>15<br>41 |
| 46<br>84       | NCAM<br>1    | Neural cell adhesion molecule 1                              | 5.<br>80<br>38<br>4 | 7.<br>44<br>18<br>1 | 5.<br>18<br>44<br>3 | 4.<br>52<br>40<br>8 | 4.<br>90<br>74<br>8 | 4.<br>90<br>35<br>3 | -2.<br>575<br>757<br>308 | -1.<br>364<br>996<br>667 | 2.5<br>75<br>75<br>73<br>08 | D<br>o<br>w<br>n | 0.0<br>42<br>27<br>32<br>55 | 0.4<br>31<br>20<br>62<br>22 |
| 32<br>51       | HPRT1        | Hypoxanthine phosphoribosyltransferase 1                     | 5.<br>33<br>47<br>9 | 5.<br>07<br>25<br>2 | 4.<br>82<br>88<br>1 | 6.<br>38<br>5       | 7.<br>13<br>45<br>4 | 5.<br>63<br>69      | 2.4<br>738<br>762<br>48  | 1.3<br>067<br>733<br>33  | 2.4<br>73<br>87<br>62<br>48 | U<br>p           | 0.0<br>12<br>44<br>64<br>19 | 0.3<br>34<br>46<br>67<br>31 |

|                |                                   |                                                               |                      |                     |                      |                      |                      |                     |                          |                          |                             |                  |                             |                             |
|----------------|-----------------------------------|---------------------------------------------------------------|----------------------|---------------------|----------------------|----------------------|----------------------|---------------------|--------------------------|--------------------------|-----------------------------|------------------|-----------------------------|-----------------------------|
| 41<br>24       | MAN2<br>A1                        | Mannosidase, $\alpha$ ,<br>class 2A, member<br>1              | 6.<br>99<br>52<br>3  | 6.<br>05<br>27<br>1 | 6.<br>28<br>59<br>6  | 5.<br>19<br>72<br>1  | 6.<br>00<br>54<br>6  | 5.<br>07<br>92      | -2.<br>024<br>188<br>062 | -1.<br>017<br>343<br>333 | 2.0<br>24<br>18<br>80<br>62 | D<br>o<br>w<br>n | 0.0<br>25<br>17<br>87<br>97 | 0.3<br>83<br>71<br>27<br>62 |
| 11<br>28       | CHRM<br>1                         | Cholinergic<br>receptor,<br>muscarinic 1                      | 4.<br>09<br>49<br>4  | 7.<br>10<br>62<br>4 | 6.<br>35<br>30<br>4  | 4.<br>29<br>52       | 3.<br>74<br>19<br>8  | 4.<br>23<br>62<br>9 | -3.<br>387<br>568<br>219 | -1.<br>760<br>25         | 3.3<br>87<br>56<br>82<br>19 | D<br>o<br>w<br>n | 0.0<br>44<br>74<br>89<br>6  | 0.4<br>35<br>52<br>77<br>14 |
| 22<br>26<br>43 | UNC5<br>CL                        | Unc-5 family<br>C-terminal like                               | 7.<br>31<br>77<br>1  | 7.<br>13<br>23<br>5 | 7.<br>43<br>07<br>1  | 5.<br>75<br>30<br>3  | 6.<br>45<br>59       | 5.<br>56<br>57<br>1 | -2.<br>582<br>395<br>554 | -1.<br>368<br>71         | 2.5<br>82<br>39<br>55<br>54 | D<br>o<br>w<br>n | 0.0<br>01<br>97<br>99<br>63 | 0.2<br>01<br>23<br>04<br>31 |
| 68<br>8        | KLF5                              | Kruppel-like<br>factor 5 (intestinal)                         | 8.<br>23<br>12<br>9  | 7.<br>36<br>60<br>2 | 8.<br>27<br>64<br>6  | 9.<br>30<br>32<br>1  | 8.<br>87<br>61<br>7  | 8.<br>93<br>49<br>9 | 2.1<br>143<br>291<br>69  | 1.0<br>802               | 2.1<br>14<br>32<br>91<br>69 | U<br>p           | 0.0<br>10<br>22<br>73<br>79 | 0.3<br>18<br>63<br>84<br>27 |
| 10<br>92<br>6  | DBF4                              | DBF4 zinc finger                                              | 4.<br>62<br>98<br>1  | 5.<br>08<br>94      | 4.<br>94<br>85<br>4  | 5.<br>43<br>02<br>4  | 6.<br>77<br>32<br>5  | 5.<br>83<br>40<br>8 | 2.1<br>784<br>067<br>13  | 1.1<br>232<br>733<br>33  | 2.1<br>78<br>40<br>67<br>13 | U<br>p           | 0.0<br>17<br>98<br>22<br>52 | 0.3<br>62<br>48<br>76<br>38 |
| 42<br>53       | CTAG<br>E5                        | CTAGE family<br>member 5                                      | 9.<br>81<br>78<br>5  | 9.<br>66<br>57<br>3 | 10<br>.1<br>47<br>95 | 8.<br>52<br>84<br>7  | 8.<br>28<br>96<br>2  | 9.<br>11<br>92<br>5 | -2.<br>347<br>941<br>831 | -1.<br>231<br>396<br>667 | 2.3<br>47<br>94<br>18<br>31 | D<br>o<br>w<br>n | 0.0<br>03<br>55<br>09<br>18 | 0.2<br>37<br>14<br>66<br>6  |
| 83<br>45       | HIST1<br>H2BH                     | Histone cluster 1,<br>h2bh                                    | 10<br>.0<br>92<br>21 | 8.<br>93<br>74<br>5 | 9.<br>01<br>67<br>9  | 10<br>.5<br>50<br>16 | 11<br>.6<br>91<br>54 | 10<br>.4<br>29<br>5 | 2.9<br>111<br>382<br>07  | 1.5<br>415<br>833<br>33  | 2.9<br>11<br>13<br>82<br>07 | U<br>p           | 0.0<br>11<br>82<br>93<br>48 | 0.3<br>29<br>73<br>79<br>49 |
| 83<br>59<br>3  | RASSF<br>5                        | Ras association<br>(ralgds/AF-6)<br>domain family<br>member 5 | 8.<br>66<br>90<br>5  | 8.<br>74<br>65<br>4 | 8.<br>95<br>40<br>1  | 6.<br>21<br>66<br>5  | 7.<br>24<br>46<br>5  | 7.<br>33<br>37<br>1 | -3.<br>625<br>541<br>949 | -1.<br>858<br>196<br>667 | 3.6<br>25<br>54<br>19<br>49 | D<br>o<br>w<br>n | 0.0<br>00<br>90<br>82<br>4  | 0.1<br>81<br>04<br>09<br>24 |
| 57<br>65<br>3  | LOC10<br>049948<br>4-C9O<br>RF174 | LOC100499484-c<br>9orf174<br>readthrough                      | 5.<br>20<br>56       | 5.<br>44<br>10<br>4 | 5.<br>73<br>66<br>4  | 4.<br>11<br>49<br>1  | 4.<br>38<br>10<br>3  | 4.<br>78<br>42<br>5 | -2.<br>048<br>209<br>564 | -1.<br>034<br>363<br>333 | 2.0<br>48<br>20<br>95       | D<br>o<br>w<br>n | 0.0<br>04<br>61<br>04       | 0.2<br>54<br>41<br>63       |

|                           |                      |                                                                                                         |                      |                      |                      |                      |                      |                      |                          |                          |                             |                  |                             |                             |
|---------------------------|----------------------|---------------------------------------------------------------------------------------------------------|----------------------|----------------------|----------------------|----------------------|----------------------|----------------------|--------------------------|--------------------------|-----------------------------|------------------|-----------------------------|-----------------------------|
|                           |                      |                                                                                                         |                      |                      |                      |                      |                      |                      |                          |                          | 64                          |                  | 78                          | 12                          |
| 20<br>12                  | EMP1                 | Epithelial<br>membrane protein<br>1                                                                     | 4.<br>56<br>87<br>1  | 3.<br>41<br>38<br>1  | 3.<br>51<br>10<br>2  | 4.<br>89<br>85       | 7.<br>44<br>82<br>5  | 6.<br>13<br>80<br>4  | 5.0<br>295<br>058<br>67  | 2.3<br>304<br>166<br>67  | 5.0<br>29<br>50<br>58<br>67 | U<br>p           | 0.0<br>08<br>92<br>87<br>53 | 0.3<br>09<br>00<br>88<br>78 |
| 47<br>51                  | NEK2                 | NIMA-related<br>kinase 2                                                                                | 4.<br>72<br>61<br>7  | 4.<br>28<br>42<br>5  | 4.<br>69<br>94<br>8  | 7.<br>53<br>78<br>2  | 7.<br>72<br>47       | 5.<br>94<br>39<br>4  | 5.6<br>523<br>599<br>18  | 2.4<br>988<br>533<br>33  | 5.6<br>52<br>35<br>99<br>18 | U<br>p           | 0.0<br>01<br>25<br>29<br>59 | 0.1<br>87<br>10<br>78<br>18 |
| 10<br>53<br>77<br>75<br>1 | LOC10<br>537775<br>1 | Uncharacterized<br>LOC105377751                                                                         | 6.<br>87<br>68<br>9  | 6.<br>80<br>65<br>5  | 6.<br>70<br>38<br>9  | 3.<br>93<br>42<br>4  | 3.<br>95<br>25<br>1  | 5.<br>88<br>33<br>8  | -4.<br>613<br>089<br>661 | -2.<br>205<br>733<br>333 | 4.6<br>13<br>08<br>96<br>61 | D<br>o<br>w<br>n | 0.0<br>04<br>08<br>31<br>77 | 0.2<br>44<br>25<br>17<br>2  |
| 90<br>75                  | CLDN<br>2            | Claudin 2                                                                                               | 6.<br>65<br>58<br>1  | 12<br>.0<br>53<br>15 | 11<br>.9<br>72<br>38 | 5.<br>06<br>98<br>6  | 7.<br>38<br>10<br>2  | 4.<br>28<br>52<br>7  | -25<br>.07<br>880<br>441 | -4.<br>648<br>396<br>667 | 25.<br>07<br>88<br>04<br>41 | D<br>o<br>w<br>n | 0.0<br>19<br>69<br>04<br>8  | 0.3<br>67<br>76<br>00<br>84 |
| 83<br>37                  | HIST2<br>H2AA<br>3   | Histone cluster 2,<br>h2aa3                                                                             | 10<br>.4<br>75<br>23 | 9.<br>12<br>07<br>4  | 9.<br>52<br>91<br>4  | 11<br>.0<br>78<br>25 | 11<br>.2<br>34<br>59 | 10<br>.4<br>18<br>47 | 2.3<br>006<br>900<br>99  | 1.2<br>020<br>666<br>67  | 2.3<br>00<br>69<br>00<br>99 | U<br>p           | 0.0<br>20<br>74<br>91<br>62 | 0.3<br>71<br>73<br>76<br>6  |
| 20<br>21<br>34            | FAM1<br>53B          | Family with<br>sequence<br>similarity<br>member B                                                       | 6.<br>87<br>68<br>9  | 6.<br>80<br>65<br>5  | 6.<br>70<br>38<br>9  | 3.<br>93<br>42<br>4  | 3.<br>95<br>25<br>1  | 5.<br>88<br>33<br>8  | -4.<br>613<br>089<br>661 | -2.<br>205<br>733<br>333 | 4.6<br>13<br>08<br>96<br>61 | D<br>o<br>w<br>n | 0.0<br>04<br>08<br>31<br>77 | 0.2<br>44<br>25<br>17<br>2  |
| 52<br>67                  | SERPI<br>NA4         | Serpin peptidase<br>inhibitor, clade A<br>( $\alpha$ -1<br>antiproteinase,<br>antitrypsin),<br>member 4 | 9.<br>52<br>23<br>2  | 9.<br>92<br>65<br>9  | 9.<br>84<br>96<br>2  | 7.<br>52<br>51       | 6.<br>23<br>58<br>8  | 9.<br>33<br>40<br>8  | -4.<br>192<br>613<br>965 | -2.<br>067<br>85         | 4.1<br>92<br>61<br>39<br>65 | D<br>o<br>w<br>n | 0.0<br>23<br>32<br>83<br>64 | 0.3<br>80<br>85<br>39<br>85 |
| 10<br>09<br>2             | ARPC<br>5            | Actin related<br>protein 2/3<br>complex subunit 5                                                       | 7.<br>97<br>38<br>6  | 7.<br>16<br>96<br>1  | 7.<br>47<br>45<br>7  | 8.<br>48<br>56<br>7  | 8.<br>87<br>24<br>1  | 8.<br>35<br>40<br>9  | 2.0<br>439<br>737<br>48  | 1.0<br>313<br>766<br>67  | 2.0<br>43<br>97<br>37<br>48 | U<br>p           | 0.0<br>08<br>43<br>07<br>07 | 0.3<br>05<br>83<br>03<br>66 |
| 69<br>48                  | TCN2                 | Transcobalamin II                                                                                       | 9.<br>05             | 8.<br>68             | 9.<br>01             | 6.<br>83             | 7.<br>30             | 6.<br>44             | -4.<br>149               | -2.<br>052               | 4.1<br>49                   | D<br>o           | 0.0<br>00                   | 0.1<br>28                   |

|        |           |                                                                           |          |          |         |         |          |         |           |           |           |   |            |             |
|--------|-----------|---------------------------------------------------------------------------|----------|----------|---------|---------|----------|---------|-----------|-----------|-----------|---|------------|-------------|
|        |           |                                                                           | 174      | 541      | 156     | 959     | 49       | 576     | 162038    | 82        | 162038    | w | 163191     | 621894      |
| 246734 | NPCDR1    | Nasopharyngeal carcinoma, down-regulated 1                                | 5.72723  | 4.13972  | 5.78095 | 4.4946  | 3.80259  | 3.83583 | -2.252655 | -1.171626 | 2.252655  | D | 0.042247   | 0.4311549   |
| 2246   | FGF1      | Fibroblast growth factor 1 (acidic)                                       | 5.0621   | 5.76176  | 5.75274 | 4.16593 | 4.93309  | 4.32878 | -2.069955 | -1.0496   | 2.069955  | D | 0.0103409  | 0.319375494 |
| 745    | MYRF      | Myelin regulatory factor                                                  | 8.17492  | 8.801056 | 8.15524 | 6.70384 | 5.78122  | 6.76081 | -3.245145 | -1.698283 | 3.245145  | D | 0.009027   | 0.181040924 |
| 57175  | CORO1B    | Coronin, actin binding protein, 1B                                        | 6.9408   | 7.49776  | 7.06541 | 6.03008 | 6.18748  | 6.10959 | -2.083400 | -1.05894  | 2.083400  | D | 0.0023745  | 0.2144943   |
| 390    | RND3      | Rho family gtpase 3                                                       | 6.84746  | 5.64488  | 5.31932 | 7.51629 | 8.05559  | 7.30535 | 3.22326   | 1.688523  | 3.22326   | U | 0.006024   | 0.279481742 |
| 2260   | FGFR1     | Fibroblast growth factor receptor 1                                       | 6.06597  | 5.67623  | 6.34101 | 4.84059 | 5.18485  | 4.77562 | -2.134724 | -1.09405  | 2.134724  | D | 0.03220148 | 0.234716379 |
| 972    | CD74      | CD74 molecule, major histocompatibility complex, class II invariant chain | 13.45187 | 12.41313 | 13.0121 | 9.67689 | 12.25017 | 11.9246 | -3.145290 | -1.653193 | 3.145290  | D | 0.0470734  | 0.441457431 |
| 8346   | HIST1H2BI | Histone cluster 1, h2bi                                                   | 7.37247  | 6.42515  | 6.32847 | 7.46377 | 8.92266  | 7.3238  | 2.2889934 | 1.1947133 | 2.2889934 | U | 0.0483057  | 0.44427855  |
| 52     | PI3       | Peptidase inhibitor                                                       | 5.       | 6.       | 6.      | 9.      | 8.       | 8.      | 5.3       | 2.4       | 5.3       | U | 0.0        | 0.1         |

|                           |                      |                                                                                                  |                     |                     |                     |                     |                     |                     |                          |                          |                             |                  |                             |                             |
|---------------------------|----------------------|--------------------------------------------------------------------------------------------------|---------------------|---------------------|---------------------|---------------------|---------------------|---------------------|--------------------------|--------------------------|-----------------------------|------------------|-----------------------------|-----------------------------|
| 66                        |                      | 3, skin-derived                                                                                  | 80<br>38<br>4       | 19<br>16<br>2       | 50<br>42<br>6       | 15<br>38<br>4       | 23<br>06<br>4       | 33<br>35<br>8       | 004<br>444<br>37         | 061<br>133<br>33         | 00<br>44<br>44<br>37        | p                | 00<br>16<br>46<br>09        | 28<br>62<br>18<br>94        |
| 28<br>43<br>91            | ZNF84<br>4           | Zinc finger protein<br>844                                                                       | 6.<br>04<br>53<br>2 | 6.<br>07<br>72<br>6 | 5.<br>97<br>55<br>5 | 2.<br>91<br>06<br>4 | 5.<br>58<br>85<br>9 | 4.<br>61<br>07<br>2 | -3.<br>166<br>143<br>548 | -1.<br>662<br>726<br>667 | 3.1<br>66<br>14<br>35<br>48 | D<br>o<br>w<br>n | 0.0<br>31<br>55<br>97<br>03 | 0.4<br>01<br>56<br>52<br>84 |
| 21<br>21                  | EVC                  | Ellis van Creveld<br>protein                                                                     | 7.<br>29<br>41<br>8 | 6.<br>71<br>56<br>5 | 7.<br>27<br>48<br>5 | 4.<br>76<br>00<br>7 | 6.<br>00<br>43<br>1 | 5.<br>65<br>90<br>8 | -3.<br>074<br>616<br>913 | -1.<br>620<br>406<br>667 | 3.0<br>74<br>61<br>69<br>13 | D<br>o<br>w<br>n | 0.0<br>03<br>11<br>14<br>39 | 0.2<br>34<br>23<br>93<br>82 |
| 19<br>97<br>77            | ZNF62<br>6           | Zinc finger protein<br>626                                                                       | 6.<br>69<br>05<br>7 | 6.<br>61<br>70<br>5 | 6.<br>36<br>73<br>8 | 4.<br>29<br>18<br>9 | 5.<br>34<br>54<br>1 | 4.<br>88<br>86<br>5 | -3.<br>286<br>039<br>905 | -1.<br>716<br>35         | 3.2<br>86<br>03<br>99<br>05 | D<br>o<br>w<br>n | 0.0<br>00<br>77<br>34<br>95 | 0.1<br>77<br>73<br>29<br>45 |
| 10<br>01<br>33<br>33<br>1 | LOC10<br>013333<br>1 | Uncharacterized<br>LOC100133331                                                                  | 8.<br>03<br>35<br>9 | 8.<br>30<br>84<br>8 | 7.<br>49<br>20<br>1 | 5.<br>71<br>04<br>9 | 6.<br>09<br>29<br>7 | 7.<br>81<br>82<br>4 | -2.<br>646<br>575<br>235 | -1.<br>404<br>126<br>667 | 2.6<br>46<br>57<br>52<br>35 | D<br>o<br>w<br>n | 0.0<br>40<br>05<br>82<br>98 | 0.4<br>24<br>35<br>94<br>44 |
| 70<br>20                  | TFAP2<br>A           | Transcription<br>factor AP-2 $\alpha$<br>(activating<br>enhancer binding<br>protein 2 $\alpha$ ) | 4.<br>36<br>61      | 2.<br>72<br>98<br>5 | 3.<br>45<br>48<br>9 | 9.<br>06<br>77<br>6 | 6.<br>84<br>67<br>7 | 7.<br>20<br>57<br>7 | 18.<br>249<br>942<br>33  | 4.1<br>898<br>2          | 18.<br>24<br>99<br>42<br>33 | U<br>p           | 0.0<br>00<br>39<br>82<br>9  | 0.1<br>60<br>90<br>15<br>41 |
| 37<br>62                  | KCNJ5                | Potassium<br>channel, inwardly<br>rectifying<br>subfamily J,<br>member 5                         | 5.<br>19<br>04<br>7 | 7.<br>07<br>43<br>9 | 6.<br>07<br>39<br>9 | 4.<br>97<br>66      | 4.<br>85<br>28<br>9 | 5.<br>07<br>70<br>9 | -2.<br>210<br>066<br>836 | -1.<br>144<br>09         | 2.2<br>10<br>06<br>68<br>36 | D<br>o<br>w<br>n | 0.0<br>39<br>58<br>53<br>78 | 0.4<br>23<br>36<br>74<br>07 |
| 83<br>99<br>8             | REG4                 | Regenerating<br>family member 4                                                                  | 4.<br>21<br>38<br>7 | 4.<br>45<br>00<br>3 | 4.<br>93<br>56<br>3 | 6.<br>95<br>84<br>2 | 5.<br>75<br>09<br>9 | 5.<br>16<br>14<br>3 | 2.6<br>828<br>567<br>04  | 1.4<br>237<br>7          | 2.6<br>82<br>85<br>67<br>04 | U<br>p           | 0.0<br>18<br>67<br>32<br>57 | 0.3<br>65<br>32<br>07<br>18 |
| 58<br>02                  | PTPRS                | Protein tyrosine<br>phosphatase,<br>receptor type, S                                             | 8.<br>06<br>11<br>7 | 7.<br>81<br>31<br>4 | 8.<br>34<br>05<br>8 | 6.<br>83<br>00<br>5 | 6.<br>17<br>80<br>9 | 5.<br>50<br>60<br>7 | -3.<br>732<br>718<br>38  | -1.<br>900<br>226<br>667 | 3.7<br>32<br>71<br>83<br>8  | D<br>o<br>w<br>n | 0.0<br>01<br>25<br>14<br>01 | 0.1<br>87<br>10<br>78<br>18 |

|               |              |                                                                    |                     |                     |                     |                     |                      |                     |                          |                          |                             |                  |                             |                             |
|---------------|--------------|--------------------------------------------------------------------|---------------------|---------------------|---------------------|---------------------|----------------------|---------------------|--------------------------|--------------------------|-----------------------------|------------------|-----------------------------|-----------------------------|
| 63<br>34      | SCN8<br>A    | Sodium channel,<br>voltage gated, type<br>VIII $\alpha$ subunit    | 7.<br>57<br>53<br>7 | 5.<br>69<br>51<br>4 | 6.<br>58<br>48<br>6 | 4.<br>92<br>38<br>1 | 5.<br>53<br>81       | 5.<br>64<br>57<br>6 | -2.<br>377<br>150<br>646 | -1.<br>249<br>233<br>333 | 2.3<br>77<br>15<br>06<br>46 | D<br>o<br>w<br>n | 0.0<br>36<br>14<br>49<br>69 | 0.4<br>12<br>66<br>73<br>89 |
| 25<br>28      | FUT6         | Fucosyltransferase<br>6                                            | 7.<br>77            | 8.<br>41<br>89      | 8.<br>38<br>97      | 7.<br>63<br>81<br>6 | 6.<br>60<br>04<br>4  | 5.<br>36<br>77<br>1 | -3.<br>154<br>540<br>777 | -1.<br>657<br>43         | 3.1<br>54<br>54<br>07<br>77 | D<br>o<br>w<br>n | 0.0<br>20<br>67<br>79<br>85 | 0.3<br>71<br>59<br>28<br>73 |
| 98<br>82      | TBC1<br>D4   | TBC1 domain<br>family member 4                                     | 6.<br>48<br>99      | 6.<br>84<br>36<br>9 | 6.<br>98<br>17<br>8 | 6.<br>19<br>19<br>7 | 5.<br>99<br>88<br>1  | 4.<br>74<br>36<br>6 | -2.<br>184<br>005<br>768 | -1.<br>126<br>976<br>667 | 2.1<br>84<br>00<br>57<br>68 | D<br>o<br>w<br>n | 0.0<br>27<br>70<br>73<br>71 | 0.3<br>91<br>40<br>80<br>15 |
| 19<br>48      | EFNB2        | Ephrin-B2                                                          | 2.<br>68<br>31<br>4 | 5.<br>63<br>23<br>6 | 5.<br>64<br>36<br>7 | 7.<br>30<br>56<br>3 | 7.<br>48<br>70<br>7  | 6.<br>42<br>89<br>5 | 5.3<br>547<br>776<br>37  | 2.4<br>208<br>266<br>67  | 5.3<br>54<br>77<br>76<br>37 | U<br>p           | 0.0<br>20<br>36<br>28<br>63 | 0.3<br>71<br>13<br>26<br>99 |
| 88<br>47      | DLEU<br>2    | Deleted in<br>lymphocytic<br>leukemia 2<br>(non-protein<br>coding) | 4.<br>00<br>35<br>4 | 4.<br>05<br>01<br>4 | 4.<br>50<br>13<br>8 | 6.<br>06<br>23<br>2 | 5.<br>54<br>75       | 4.<br>74<br>21<br>8 | 2.4<br>043<br>495<br>72  | 1.2<br>656<br>466<br>67  | 2.4<br>04<br>34<br>95<br>72 | U<br>p           | 0.0<br>09<br>43<br>35<br>77 | 0.3<br>12<br>07<br>48<br>68 |
| 79<br>98<br>3 | POF1B        | Premature ovarian<br>failure, 1B                                   | 8.<br>57<br>89<br>5 | 7.<br>66<br>74      | 8.<br>38<br>13<br>1 | 8.<br>80<br>95<br>8 | 10<br>.2<br>82<br>72 | 9.<br>54<br>49<br>4 | 2.5<br>254<br>258<br>22  | 1.3<br>365<br>266<br>67  | 2.5<br>25<br>42<br>58<br>22 | U<br>p           | 0.0<br>16<br>98<br>12<br>9  | 0.3<br>58<br>57<br>98<br>86 |
| 65<br>3       | BMP5         | Bone<br>morphogenetic<br>protein 5                                 | 6.<br>90<br>93<br>4 | 5.<br>81<br>06<br>6 | 5.<br>35<br>89<br>7 | 4.<br>51<br>76      | 4.<br>19<br>99<br>6  | 3.<br>93<br>25<br>7 | -3.<br>505<br>483<br>231 | -1.<br>809<br>613<br>333 | 3.5<br>05<br>48<br>32<br>31 | D<br>o<br>w<br>n | 0.0<br>03<br>16<br>39<br>63 | 0.2<br>34<br>23<br>93<br>82 |
| 91<br>33      | CCNB<br>2    | Cyclin B2                                                          | 4.<br>72<br>79      | 4.<br>17<br>00<br>7 | 4.<br>78<br>80<br>8 | 5.<br>69<br>34<br>3 | 6.<br>60<br>63<br>3  | 5.<br>03<br>33<br>5 | 2.3<br>225<br>129<br>91  | 1.2<br>156<br>866<br>67  | 2.3<br>22<br>51<br>29<br>91 | U<br>p           | 0.0<br>22<br>12<br>85<br>07 | 0.3<br>78<br>35<br>72<br>21 |
| 91<br>89<br>4 | C11orf<br>52 | Chromosome 11<br>open reading<br>frame 52                          | 6.<br>60<br>85<br>9 | 6.<br>14<br>75<br>6 | 6.<br>22<br>97<br>8 | 4.<br>51<br>20<br>8 | 4.<br>94<br>78<br>8  | 5.<br>35<br>58<br>2 | -2.<br>620<br>877<br>639 | -1.<br>390<br>05         | 2.6<br>20<br>87<br>76       | D<br>o<br>w<br>n | 0.0<br>01<br>62<br>65       | 0.1<br>88<br>01<br>18       |



|                           |                      |                                                                                                     |                     |                     |                     |                     |                     |                     |                          |                          |                             |                  |                             |                             |    |
|---------------------------|----------------------|-----------------------------------------------------------------------------------------------------|---------------------|---------------------|---------------------|---------------------|---------------------|---------------------|--------------------------|--------------------------|-----------------------------|------------------|-----------------------------|-----------------------------|----|
|                           |                      |                                                                                                     |                     |                     |                     |                     |                     |                     |                          |                          |                             | 39               |                             | 58                          | 53 |
| 89<br>2                   | CCNC                 | Cyclin C                                                                                            | 8.<br>00<br>18<br>5 | 7.<br>85<br>57      | 7.<br>79<br>50<br>9 | 6.<br>36<br>73<br>2 | 6.<br>94<br>96<br>4 | 6.<br>61<br>38<br>6 | -2.<br>362<br>978<br>768 | -1.<br>240<br>606<br>667 | 2.3<br>62<br>97<br>87<br>68 | D<br>o<br>w<br>n | 0.0<br>01<br>05<br>49<br>64 | 0.1<br>86<br>14<br>79<br>2  |    |
| 25<br>80<br>5             | BAMB<br>I            | BMP and activin<br>membrane-bound<br>inhibitor                                                      | 6.<br>52<br>32<br>4 | 7.<br>93<br>97<br>6 | 8.<br>42<br>26<br>7 | 5.<br>34<br>23<br>5 | 4.<br>95<br>38<br>3 | 6.<br>94<br>95<br>6 | -3.<br>680<br>691<br>073 | -1.<br>879<br>976<br>667 | 3.6<br>80<br>69<br>10<br>73 | D<br>o<br>w<br>n | 0.0<br>25<br>15<br>40<br>84 | 0.3<br>83<br>71<br>27<br>62 |    |
| 54<br>74<br>9             | EPDR1                | Ependymin related<br>1                                                                              | 5.<br>36<br>76<br>2 | 5.<br>07<br>83<br>1 | 3.<br>72<br>19<br>2 | 6.<br>37<br>36<br>1 | 6.<br>94<br>30<br>5 | 5.<br>42<br>75<br>1 | 2.8<br>787<br>45         | 1.5<br>254<br>4          | 2.8<br>78<br>74<br>5        | U<br>p           | 0.0<br>25<br>97<br>04<br>47 | 0.3<br>85<br>81<br>07<br>78 |    |
| 20<br>57                  | EPOR                 | Erythropoietin<br>receptor                                                                          | 6.<br>69<br>06<br>6 | 7.<br>26<br>75<br>2 | 7.<br>21<br>14<br>6 | 5.<br>91<br>25<br>6 | 4.<br>57<br>44<br>5 | 6.<br>27<br>06<br>1 | -2.<br>771<br>512<br>152 | -1.<br>470<br>673<br>333 | 2.7<br>71<br>51<br>21<br>52 | D<br>o<br>w<br>n | 0.0<br>14<br>57<br>34<br>17 | 0.3<br>46<br>82<br>70<br>31 |    |
| 32<br>95                  | HSD17<br>B4          | Hydroxysteroid<br>(17- $\beta$ )<br>dehydrogenase 4                                                 | 9.<br>34<br>34<br>6 | 9.<br>26<br>38<br>4 | 9.<br>31<br>32      | 8.<br>67<br>30<br>8 | 8.<br>20<br>10<br>8 | 8.<br>02<br>58<br>4 | -2.<br>009<br>495<br>481 | -1.<br>006<br>833<br>333 | 2.0<br>09<br>49<br>54<br>81 | D<br>o<br>w<br>n | 0.0<br>03<br>93<br>12<br>18 | 0.2<br>40<br>20<br>47<br>61 |    |
| 61<br>93                  | RPS5                 | Ribosomal protein<br>S5                                                                             | 7.<br>82<br>35<br>2 | 8.<br>97<br>41<br>1 | 8.<br>75<br>43<br>1 | 9.<br>87<br>58<br>6 | 9.<br>75<br>97<br>4 | 9.<br>64<br>99<br>4 | 2.3<br>694<br>189<br>85  | 1.2<br>445<br>333<br>33  | 2.3<br>69<br>41<br>89<br>85 | U<br>p           | 0.0<br>07<br>06<br>06<br>38 | 0.2<br>89<br>31<br>65<br>01 |    |
| 10<br>53<br>79<br>55<br>6 | LOC10<br>537955<br>6 | Nascent<br>polypeptide-associ<br>ated complex<br>subunit $\alpha$ ,<br>muscle-specific<br>form-like | 8.<br>03<br>35<br>9 | 8.<br>30<br>84<br>8 | 7.<br>49<br>20<br>1 | 5.<br>71<br>04<br>9 | 6.<br>09<br>29<br>7 | 7.<br>81<br>82<br>4 | -2.<br>646<br>575<br>235 | -1.<br>404<br>126<br>667 | 2.6<br>46<br>57<br>52<br>35 | D<br>o<br>w<br>n | 0.0<br>40<br>05<br>82<br>98 | 0.4<br>24<br>35<br>94<br>44 |    |
| 55<br>02<br>2             | PID1                 | Phosphotyrosine<br>interaction domain<br>containing 1                                               | 6.<br>46<br>53<br>6 | 6.<br>19<br>37<br>1 | 6.<br>03<br>30<br>6 | 7.<br>07<br>35<br>7 | 7.<br>68<br>57<br>1 | 7.<br>12<br>04<br>6 | 2.0<br>886<br>006<br>47  | 1.0<br>625<br>366<br>67  | 2.0<br>88<br>60<br>06<br>47 | U<br>p           | 0.0<br>04<br>40<br>00<br>38 | 0.2<br>50<br>69<br>80<br>14 |    |
| 92<br>1                   | CD5                  | CD5 molecule                                                                                        | 5.<br>14            | 7.<br>62            | 7.<br>28            | 4.<br>56            | 5.<br>25            | 5.<br>23            | -3.<br>180               | -1.<br>669               | 3.1<br>80                   | D<br>o           | 0.0<br>35                   | 0.4<br>09                   |    |

|               |             |                                                                |                     |                     |                     |                     |                     |                     |                          |                          |                             |                  |                             |                             |
|---------------|-------------|----------------------------------------------------------------|---------------------|---------------------|---------------------|---------------------|---------------------|---------------------|--------------------------|--------------------------|-----------------------------|------------------|-----------------------------|-----------------------------|
|               |             |                                                                | 87<br>3             | 58<br>4             | 30<br>7             | 27<br>1             | 53<br>9             | 21<br>5             | 227<br>558               | 13                       | 22<br>75<br>58              | w<br>n           | 18<br>99<br>48              | 00<br>19<br>13              |
| 51<br>37<br>7 | UCHL<br>5   | Ubiquitin<br>C-terminal<br>hydrolase L5                        | 6.<br>01<br>56<br>3 | 6.<br>59<br>47<br>7 | 6.<br>36<br>86      | 7.<br>98<br>32<br>3 | 7.<br>77<br>42<br>3 | 6.<br>56<br>99<br>2 | 2.1<br>676<br>422<br>41  | 1.1<br>161<br>266<br>67  | 2.1<br>67<br>64<br>22<br>41 | U<br>p           | 0.0<br>28<br>02<br>61<br>35 | 0.3<br>92<br>00<br>23<br>37 |
| 79<br>89<br>9 | PRR5L       | Proline rich 5 like                                            | 6.<br>12<br>15<br>7 | 6.<br>06<br>83<br>7 | 5.<br>78<br>52<br>2 | 4.<br>23<br>96<br>7 | 5.<br>58<br>60<br>1 | 4.<br>95<br>56<br>5 | -2.<br>091<br>604<br>385 | -1.<br>064<br>61         | 2.0<br>91<br>60<br>43<br>85 | D<br>o<br>w<br>n | 0.0<br>19<br>67<br>40<br>01 | 0.3<br>67<br>76<br>00<br>84 |
| 23<br>30<br>6 | NEMP<br>1   | Nuclear envelope<br>integral membrane<br>protein 1             | 4.<br>87<br>40<br>9 | 4.<br>95<br>77<br>7 | 4.<br>55<br>90<br>1 | 6.<br>18<br>51<br>6 | 5.<br>95<br>04<br>7 | 6.<br>12<br>64<br>5 | 2.4<br>459<br>642<br>76  | 1.2<br>904<br>033<br>33  | 2.4<br>45<br>96<br>42<br>76 | U<br>p           | 0.0<br>00<br>42<br>65<br>44 | 0.1<br>63<br>37<br>87<br>34 |
| 76<br>94      | ZNF13<br>5  | Zinc finger protein<br>135                                     | 6.<br>95<br>55<br>2 | 6.<br>96<br>95      | 7.<br>04<br>65<br>5 | 4.<br>14<br>38<br>6 | 5.<br>22<br>35<br>6 | 4.<br>47<br>9       | -5.<br>187<br>538<br>002 | -2.<br>375<br>05         | 5.1<br>87<br>53<br>80<br>02 | D<br>o<br>w<br>n | 0.0<br>00<br>10<br>82<br>93 | 0.1<br>27<br>84<br>98<br>29 |
| 18<br>24      | DSC2        | Desmocollin 2                                                  | 6.<br>11<br>59<br>2 | 5.<br>12<br>07<br>6 | 4.<br>87<br>42<br>8 | 6.<br>99<br>77<br>3 | 7.<br>63<br>20<br>5 | 5.<br>78<br>85<br>2 | 2.7<br>052<br>838<br>95  | 1.4<br>357<br>8          | 2.7<br>05<br>28<br>38<br>95 | U<br>p           | 0.0<br>31<br>40<br>41<br>75 | 0.4<br>01<br>56<br>52<br>84 |
| 79<br>89<br>1 | ZNF67<br>1  | Zinc finger protein<br>671                                     | 5.<br>43<br>98      | 5.<br>90<br>83<br>5 | 5.<br>70<br>98<br>5 | 3.<br>93<br>66<br>5 | 4.<br>17<br>05<br>5 | 4.<br>94<br>73<br>9 | -2.<br>521<br>828<br>208 | -1.<br>334<br>47         | 2.5<br>21<br>82<br>82<br>08 | D<br>o<br>w<br>n | 0.0<br>03<br>31<br>22<br>79 | 0.2<br>36<br>57<br>66<br>81 |
| 64<br>11<br>6 | SLC39<br>A8 | Solute carrier<br>family 39 (zinc<br>transporter),<br>member 8 | 6.<br>00<br>62<br>1 | 6.<br>92<br>09<br>1 | 6.<br>65<br>33<br>8 | 5.<br>05<br>78<br>4 | 4.<br>89<br>69<br>4 | 4.<br>00<br>74<br>8 | -3.<br>662<br>291<br>601 | -1.<br>872<br>746<br>667 | 3.6<br>62<br>29<br>16<br>01 | D<br>o<br>w<br>n | 0.0<br>01<br>46<br>48<br>8  | 0.1<br>87<br>10<br>78<br>18 |
| 54<br>99<br>7 | TESC        | Tescalcin                                                      | 8.<br>44<br>06<br>1 | 8.<br>79<br>17<br>5 | 8.<br>89<br>57      | 7.<br>90<br>53<br>3 | 6.<br>16<br>59<br>9 | 7.<br>88<br>59      | -2.<br>621<br>295<br>503 | -1.<br>390<br>28         | 2.6<br>21<br>29<br>55<br>03 | D<br>o<br>w<br>n | 0.0<br>24<br>82<br>81<br>99 | 0.3<br>83<br>25<br>28<br>34 |
| 57            | SYT13       | Synaptotagmin 13                                               | 8.                  | 7.                  | 8.                  | 5.                  | 4.                  | 3.                  | -11                      | -3.                      | 11.                         | D                | 0.0                         | 0.1                         |

|                           |                      |                                           |                     |                     |                     |                     |                     |                     |                          |                                   |                             |                  |                             |                             |
|---------------------------|----------------------|-------------------------------------------|---------------------|---------------------|---------------------|---------------------|---------------------|---------------------|--------------------------|-----------------------------------|-----------------------------|------------------|-----------------------------|-----------------------------|
| 58<br>6                   |                      |                                           | 55<br>72<br>6       | 63<br>08            | 99<br>27            | 83<br>49<br>4       | 68<br>76<br>9       | 93<br>98            | .89<br>906<br>795        | 572<br>776<br>667                 | 89<br>90<br>67<br>95        | o<br>w<br>n      | 00<br>34<br>90<br>26        | 60<br>90<br>15<br>41        |
| 10<br>01<br>32<br>28<br>7 | LOC10<br>013228<br>7 | Uncharacterized<br>LOC100132287           | 8.<br>03<br>35<br>9 | 8.<br>30<br>84<br>8 | 7.<br>49<br>20<br>1 | 5.<br>71<br>04<br>9 | 6.<br>09<br>29<br>7 | 7.<br>81<br>82<br>4 | -2.<br>646<br>575<br>235 | -1.<br>404<br>126<br>667          | 2.6<br>46<br>57<br>52<br>35 | D<br>o<br>w<br>n | 0.0<br>40<br>05<br>82<br>98 | 0.4<br>24<br>35<br>94<br>44 |
| 26<br>11<br>8             | WSB1                 | WD repeat and<br>SOCS box<br>containing 1 | 4.<br>47<br>41<br>5 | 4.<br>14<br>01<br>8 | 3.<br>95<br>29<br>9 | 5.<br>17<br>11<br>4 | 5.<br>85<br>91<br>1 | 4.<br>83<br>38      | 2.1<br>419<br>280<br>22  | 1.0<br>989<br>1                   | 2.1<br>41<br>92<br>80<br>22 | U<br>p           | 0.0<br>08<br>72<br>05<br>93 | 0.3<br>08<br>52<br>19<br>75 |
| 10<br>30<br>8             | ZNF26<br>7           | Zinc finger protein<br>267                | 4.<br>22<br>24<br>6 | 3.<br>26<br>57<br>3 | 3.<br>92<br>71<br>3 | 4.<br>83<br>45<br>5 | 5.<br>02<br>54<br>8 | 5.<br>84<br>49<br>8 | 2.6<br>942<br>741<br>69  | 1.4<br>298<br>966<br>67           | 2.6<br>94<br>27<br>41<br>69 | U<br>p           | 0.0<br>05<br>17<br>57<br>57 | 0.2<br>66<br>23<br>90<br>84 |
| 95<br>47                  | CXCL<br>14           | Chemokine<br>(C-X-C motif)<br>ligand 14   | 7.<br>26<br>20<br>5 | 9.<br>54<br>28<br>9 | 8.<br>36<br>47<br>5 | 5.<br>64<br>19<br>6 | 7.<br>07<br>72<br>8 | 6.<br>76<br>80<br>3 | -3.<br>717<br>003<br>38  | -1.<br>894<br>14                  | 3.7<br>17<br>00<br>33<br>8  | D<br>o<br>w<br>n | 0.0<br>19<br>73<br>92<br>54 | 0.3<br>67<br>76<br>00<br>84 |
| 84<br>7                   | CAT                  | Catalase                                  | 9.<br>77<br>11<br>6 | 9.<br>34<br>46<br>2 | 9.<br>33<br>80<br>8 | 9.<br>12<br>55<br>1 | 8.<br>69<br>44<br>7 | 7.<br>57<br>28<br>7 | -2.<br>028<br>392<br>249 | -1.<br>020<br>336<br>667          | 2.0<br>28<br>39<br>22<br>49 | D<br>o<br>w<br>n | 0.0<br>42<br>83<br>33<br>86 | 0.4<br>32<br>07<br>88<br>1  |
| 84<br>76<br>5             | ZNF57<br>7           | Zinc finger protein<br>577                | 5.<br>39<br>52<br>8 | 6.<br>17<br>72      | 6.<br>31<br>80<br>9 | 3.<br>64<br>46<br>7 | 4.<br>90<br>58<br>7 | 4.<br>11<br>26<br>2 | -3.<br>346<br>075<br>504 | -1.<br>742<br>47                  | 3.3<br>46<br>07<br>55<br>04 | D<br>o<br>w<br>n | 0.0<br>03<br>10<br>85<br>13 | 0.2<br>34<br>23<br>93<br>82 |
| 64<br>78<br>3             | RBM1<br>5            | RNA binding<br>motif protein 15           | 4.<br>90<br>39<br>2 | 5.<br>57<br>51<br>6 | 5.<br>44<br>56<br>7 | 7.<br>22<br>39<br>7 | 6.<br>59<br>37<br>2 | 5.<br>82<br>52      | 2.3<br>609<br>704<br>75  | 1.2<br>393<br>8                   | 2.3<br>60<br>97<br>04<br>75 | U<br>p           | 0.0<br>15<br>60<br>91<br>85 | 0.3<br>50<br>84<br>39<br>38 |
| 18<br>2                   | JAG1                 | Jagged 1                                  | 4.<br>78<br>31<br>6 | 5.<br>22<br>44<br>1 | 4.<br>60<br>74<br>8 | 7.<br>15<br>60<br>5 | 6.<br>90<br>92<br>6 | 6.<br>18<br>91<br>7 | 3.6<br>802<br>658<br>87  | 1.8<br>798<br>1<br>26<br>58<br>87 | 3.6<br>80<br>26<br>58<br>87 | U<br>p           | 0.0<br>00<br>60<br>08<br>3  | 0.1<br>67<br>78<br>26<br>85 |
